# Supplementary material for: Identification of Differential Expression Genes between Volume and Pressure Overloaded Hearts Based on Bioinformatics Analysis
Source: MDPI journal article supplement (doi:10.3390/genes13071276), 2022-07-19
Supplement: s1 [file s1]

Sheet S1. The differentially expressed genes (DEGs) of volume overload (VO)

| ID    | LogFC    | AveExpr  | t        | p.Value  | adj.p.Val | B        | Gene.Symbol   |
|-------|----------|----------|----------|----------|-----------|----------|---------------|
| 28963 | 2.485618 | 7.134974 | 10.84387 | 7.23E-09 | 0.000129  | 10.22246 | Gm10375       |
| 34207 | 2.40279  | 7.250885 | 10.48338 | 1.17E-08 | 0.000129  | 9.808189 | LOC100041256  |
| 40268 | 2.2274   | 6.949047 | 9.566585 | 4.29E-08 | 0.000315  | 8.68359  | BC061237      |
| 34310 | 2.226851 | 7.230612 | 8.928314 | 1.11E-07 | 0.000409  | 7.836293 | LOC100041550  |
| 11774 | 2.203637 | 12.72265 | 8.597987 | 1.86E-07 | 0.000445  | 7.37574  | Hsd3b2        |
| 7715  | 2.175901 | 7.122512 | 7.586846 | 9.72E-07 | 0.001159  | 5.867157 | LOC100044090  |
| 13532 | 2.137786 | 7.070263 | 8.170703 | 3.68E-07 | 0.000676  | 6.756772 | Orly          |
| 59366 | 2.094507 | 7.287153 | 8.806436 | 1.34E-07 | 0.000423  | 7.668158 | LOC100040235  |
| 51382 | 2.019994 | 9.844755 | 7.657062 | 8.63E-07 | 0.001159  | 5.976878 | Pign          |
| 22100 | 1.965515 | 10.29    | 5.656941 | 3.32E-05 | 0.003769  | 2.552725 | Ulk3          |
| 58659 | 1.862676 | 8.458082 | 6.46711  | 7.09E-06 | 0.002346  | 4.014119 | Fmn2          |
| 19567 | 1.74471  | 10.67976 | 5.656931 | 3.32E-05 | 0.003769  | 2.552707 | Triobp        |
| 12857 | 1.612315 | 6.875448 | 6.467791 | 7.09E-06 | 0.002346  | 4.015304 | LOC100042413  |
| 19886 | 1.563811 | 8.841558 | 5.90946  | 2.03E-05 | 0.003048  | 3.018753 | Aff3          |
| 46281 | 1.563493 | 10.08237 | 6.335107 | 9.07E-06 | 0.002463  | 3.7828   | Fam107a       |
| 39015 | 1.554225 | 8.520828 | 3.5088   | 0.002839 | 0.019696  | -1.68939 | Gsta1         |
| 39268 | 1.548705 | 9.152994 | 3.451265 | 0.003209 | 0.020878  | -1.80536 | Gm10639       |
| 32308 | 1.538695 | 7.244491 | 5.731818 | 2.87E-05 | 0.003679  | 2.691876 | Sly           |
| 8107  | 1.480945 | 7.905235 | 4.941357 | 0.00014  | 0.005859  | 1.184809 | Slc35e2       |
| 61762 | 1.441614 | 7.27396  | 5.699028 | 3.06E-05 | 0.003721  | 2.631038 | LOC380994     |
| 9509  | 1.424385 | 8.690114 | 3.659742 | 0.002058 | 0.016573  | -1.38434 | Csprs         |
| 34119 | 1.423561 | 9.606183 | 4.720611 | 0.00022  | 0.006777  | 0.750467 | E330020D12Rik |
| 43085 | 1.393177 | 7.086246 | 3.672428 | 0.002003 | 0.016353  | -1.35866 | Syt13         |
| 50954 | 1.383904 | 7.366297 | 5.775059 | 2.64E-05 | 0.003483  | 2.771868 | Sfil          |

|       |          |          |          |          |          |          |              |
|-------|----------|----------|----------|----------|----------|----------|--------------|
| 25423 | 1.359101 | 6.942301 | 4.034354 | 0.000928 | 0.011717 | -0.62558 | LOC100042435 |
| 53536 | 1.354383 | 6.858607 | 6.201055 | 1.17E-05 | 0.002765 | 3.545143 | Gm5800       |
| 50852 | 1.339991 | 7.043056 | 4.840153 | 0.000172 | 0.006133 | 0.986311 | LOC100039675 |
| 38206 | 1.325504 | 6.954495 | 6.043731 | 1.57E-05 | 0.002865 | 3.262731 | Olfr39       |
| 30502 | 1.302481 | 6.82542  | 5.528375 | 4.28E-05 | 0.00399  | 2.311948 | LOC100040022 |
| 60376 | 1.295314 | 8.621765 | 4.281225 | 0.00055  | 0.009575 | -0.12717 | Pdik11       |
| 22190 | 1.275895 | 7.237738 | 5.25486  | 7.39E-05 | 0.004874 | 1.792208 | Pgbd1        |
| 30951 | 1.244864 | 8.520059 | 4.553125 | 0.000311 | 0.007598 | 0.417745 | Slfn9        |
| 7386  | 1.236113 | 6.670749 | 5.050095 | 0.000112 | 0.005573 | 1.396813 | LOC100041207 |
| 18820 | 1.224225 | 7.146517 | 4.846886 | 0.000169 | 0.00613  | 0.99955  | Acot3        |
| 28124 | 1.217282 | 8.465396 | 2.858454 | 0.011219 | 0.043523 | -2.98001 | S100a9       |
| 55968 | 1.204884 | 11.67552 | 4.362106 | 0.000464 | 0.009    | 0.035457 | Slc8a3       |
| 35366 | 1.200904 | 11.63511 | 4.322799 | 0.000504 | 0.009325 | -0.04353 | Lhx6         |
| 14514 | 1.183372 | 6.537453 | 5.629589 | 3.51E-05 | 0.003857 | 2.501696 | LOC100040395 |
| 22853 | 1.159639 | 8.620832 | 4.769055 | 0.000199 | 0.006532 | 0.846215 | Scd3         |
| 39210 | 1.136947 | 12.91978 | 5.076922 | 0.000106 | 0.005504 | 1.448905 | Snap25       |
| 32149 | 1.136003 | 14.64699 | 4.69154  | 0.000233 | 0.006897 | 0.692898 | H2-Gs10      |
| 19990 | 1.111557 | 7.13628  | 4.82526  | 0.000177 | 0.006166 | 0.957007 | Tssk5        |
| 35051 | 1.087513 | 11.3312  | 4.40453  | 0.000425 | 0.008651 | 0.120589 | Pdzn3        |
| 61748 | 1.078852 | 7.451942 | 4.193316 | 0.000663 | 0.010247 | -0.30434 | Gm3161       |
| 4177  | 1.078389 | 7.443118 | 3.620173 | 0.002239 | 0.017286 | -1.46439 | Gsta2        |
| 8795  | 1.076142 | 12.24255 | 3.709064 | 0.001853 | 0.01565  | -1.28449 | Krt222       |
| 37573 | 1.047134 | 13.10303 | 4.835015 | 0.000174 | 0.006133 | 0.976205 | Idua         |
| 8332  | 1.046578 | 6.668707 | 5.456602 | 4.94E-05 | 0.004211 | 2.176534 | Gm9376       |
| 11084 | 1.041758 | 13.11104 | 4.537105 | 0.000322 | 0.007678 | 0.385791 | Fgf23        |
| 28749 | 1.034209 | 6.640172 | 4.680853 | 0.000239 | 0.006939 | 0.671716 | LOC100503215 |

|       |          |          |          |          |          |          |           |
|-------|----------|----------|----------|----------|----------|----------|-----------|
| 57420 | 1.034086 | 12.96086 | 4.85714  | 0.000166 | 0.006078 | 1.019706 | Slc17a5   |
| 20641 | 1.01854  | 6.750123 | 4.909848 | 0.000149 | 0.005914 | 1.123129 | BC051408  |
| 45400 | 1.014512 | 6.748313 | 5.93048  | 1.95E-05 | 0.003017 | 3.057127 | LOC677484 |
| 5489  | -1.00004 | 10.41866 | -3.11631 | 0.00653  | 0.031072 | -2.47488 | Rcor1     |
| 57339 | -1.00007 | 12.1609  | -3.7083  | 0.001856 | 0.01565  | -1.28603 | Pcbp2     |
| 61555 | -1.0001  | 7.201149 | -4.60336 | 0.00028  | 0.007327 | 0.517796 | Spna1     |
| 48134 | -1.0001  | 11.03788 | -3.24265 | 0.004999 | 0.02661  | -2.22372 | Ube2j1    |
| 60793 | -1.00016 | 12.25743 | -3.07085 | 0.007188 | 0.032953 | -2.56472 | Cln4-2    |
| 28010 | -1.00019 | 11.20422 | -2.99814 | 0.008376 | 0.036082 | -2.70777 | Wdr61     |
| 30512 | -1.00042 | 8.62537  | -3.66073 | 0.002054 | 0.016562 | -1.38234 | Ogfrl1    |
| 17268 | -1.00044 | 8.758121 | -3.73426 | 0.001756 | 0.015297 | -1.23347 | Rpia      |
| 33667 | -1.00059 | 8.05251  | -3.95049 | 0.001108 | 0.012525 | -0.79537 | Gfra2     |
| 27731 | -1.00081 | 12.73294 | -3.45692 | 0.00317  | 0.020734 | -1.79398 | Cops5     |
| 55774 | -1.00082 | 11.36153 | -4.18962 | 0.000668 | 0.010268 | -0.31179 | Prkag1    |
| 51711 | -1.001   | 10.28609 | -3.25757 | 0.004843 | 0.026079 | -2.19394 | Txndc9    |
| 9337  | -1.00104 | 12.48171 | -3.08341 | 0.007    | 0.032444 | -2.53994 | Camk2d    |
| 27524 | -1.00123 | 14.83308 | -3.69754 | 0.001899 | 0.015846 | -1.30782 | Gm15501   |
| 28424 | -1.00124 | 11.58863 | -3.71899 | 0.001814 | 0.015538 | -1.26439 | Mrps12    |
| 20294 | -1.00143 | 10.28709 | -3.46575 | 0.003111 | 0.020589 | -1.77619 | Rapgef2   |
| 24048 | -1.00149 | 8.959143 | -3.23458 | 0.005085 | 0.026878 | -2.23983 | Ptplb     |
| 42871 | -1.00164 | 10.34749 | -3.48103 | 0.003012 | 0.020295 | -1.74539 | Dhx16     |
| 4174  | -1.00164 | 10.36094 | -3.26533 | 0.004764 | 0.025854 | -2.17845 | Lrrc45    |
| 58551 | -1.00167 | 11.7471  | -3.59751 | 0.00235  | 0.017719 | -1.51022 | Nkiras2   |
| 30774 | -1.00187 | 11.3931  | -3.04519 | 0.007587 | 0.034024 | -2.61532 | Edc4      |
| 27885 | -1.00222 | 12.75387 | -3.89019 | 0.00126  | 0.013239 | -0.91752 | Dnm2      |
| 18185 | -1.00228 | 12.22668 | -3.29089 | 0.004512 | 0.025161 | -2.12734 | Irf3      |

|       |          |          |          |          |          |          |         |
|-------|----------|----------|----------|----------|----------|----------|---------|
| 16731 | -1.00231 | 9.383377 | -3.61015 | 0.002288 | 0.017493 | -1.48467 | Bcl2l12 |
| 58968 | -1.00232 | 13.67185 | -4.09334 | 0.000819 | 0.011164 | -0.50626 | Rps3    |
| 8959  | -1.00233 | 11.19793 | -2.95888 | 0.009095 | 0.038042 | -2.78466 | Taf9    |
| 37762 | -1.00236 | 10.72341 | -3.51105 | 0.002825 | 0.019649 | -1.68485 | Hmgxb3  |
| 55886 | -1.00267 | 15.20648 | -4.97069 | 0.000131 | 0.005815 | 1.24214  | Brp44l  |
| 55875 | -1.00276 | 10.71341 | -2.84005 | 0.011657 | 0.044527 | -3.01559 | Unc50   |
| 49422 | -1.00277 | 7.846938 | -4.31406 | 0.000514 | 0.009341 | -0.0611  | Pkd2l2  |
| 12239 | -1.00306 | 10.66587 | -2.99769 | 0.008384 | 0.036087 | -2.70867 | Lsm3    |
| 41165 | -1.00307 | 10.12392 | -3.2625  | 0.004793 | 0.025958 | -2.1841  | Gtf2a1  |
| 8659  | -1.00311 | 12.77165 | -3.19584 | 0.00552  | 0.028147 | -2.31702 | Larp1   |
| 12403 | -1.00321 | 13.23238 | -2.75418 | 0.013932 | 0.049965 | -3.18063 | Wnk1    |
| 8297  | -1.00342 | 9.309549 | -3.69141 | 0.001924 | 0.015958 | -1.32023 | Phf23   |
| 26696 | -1.00361 | 9.796461 | -3.21661 | 0.005282 | 0.027481 | -2.27566 | Snrpa1  |
| 52119 | -1.00364 | 10.64504 | -3.43337 | 0.003333 | 0.02129  | -1.8414  | Orc3    |
| 4727  | -1.00375 | 7.668743 | -3.71499 | 0.00183  | 0.015573 | -1.27249 | Ccnjl   |
| 58616 | -1.00387 | 8.927197 | -2.80364 | 0.012574 | 0.046622 | -3.08578 | Snai2   |
| 26054 | -1.00392 | 10.09862 | -3.09832 | 0.006783 | 0.031869 | -2.51046 | Wdr55   |
| 24350 | -1.00393 | 14.04556 | -3.73867 | 0.00174  | 0.015236 | -1.22453 | Fem1a   |
| 11277 | -1.00403 | 9.835679 | -3.08101 | 0.007035 | 0.032533 | -2.54467 | Nup35   |
| 46484 | -1.00419 | 13.78956 | -4.53931 | 0.00032  | 0.007678 | 0.39018  | Naca    |
| 15384 | -1.0043  | 9.254276 | -3.24733 | 0.004949 | 0.026398 | -2.21439 | Jarid2  |
| 52647 | -1.00435 | 12.60636 | -3.52751 | 0.002728 | 0.019251 | -1.65162 | Rpl5    |
| 54864 | -1.00444 | 14.40843 | -4.54216 | 0.000319 | 0.007663 | 0.395872 | Prdx2   |
| 47690 | -1.00478 | 11.46651 | -3.36126 | 0.003886 | 0.02303  | -1.98633 | Tpd52l2 |
| 21131 | -1.00478 | 13.03472 | -3.6217  | 0.002232 | 0.017264 | -1.46131 | Pnpla2  |
| 42671 | -1.00479 | 11.40141 | -3.37859 | 0.003745 | 0.022702 | -1.95153 | Paics   |

|       |          |          |          |          |          |          |         |
|-------|----------|----------|----------|----------|----------|----------|---------|
| 49226 | -1.00492 | 10.08394 | -3.86079 | 0.001341 | 0.013636 | -0.9771  | Wiz     |
| 4224  | -1.00493 | 11.01002 | -3.58355 | 0.002421 | 0.018068 | -1.53844 | Esrrb   |
| 8129  | -1.00496 | 9.282204 | -3.15395 | 0.006031 | 0.029664 | -2.40027 | Brwd1   |
| 58633 | -1.00504 | 8.10602  | -4.9573  | 0.000135 | 0.005828 | 1.215976 | Ybey    |
| 14113 | -1.00519 | 7.96405  | -4.07863 | 0.000845 | 0.011283 | -0.53602 | Atp10d  |
| 27405 | -1.00537 | 9.206938 | -3.62367 | 0.002223 | 0.017248 | -1.45733 | Ddr1    |
| 25152 | -1.00549 | 8.671212 | -4.34334 | 0.000483 | 0.00913  | -0.00225 | Rnaseh1 |
| 35967 | -1.00552 | 10.3344  | -3.28131 | 0.004605 | 0.025433 | -2.14651 | Sbno1   |
| 7519  | -1.00567 | 9.822577 | -2.99146 | 0.008494 | 0.036392 | -2.72088 | Zdhhc6  |
| 28206 | -1.00568 | 10.38124 | -2.87586 | 0.010819 | 0.042549 | -2.94629 | Caprin1 |
| 23341 | -1.0057  | 8.818062 | -3.74663 | 0.00171  | 0.015124 | -1.20841 | Mlx     |
| 2331  | -1.0058  | 12.70405 | -3.92284 | 0.001176 | 0.012879 | -0.85138 | Gm5614  |
| 50363 | -1.00601 | 8.901024 | -4.03941 | 0.000918 | 0.011676 | -0.61536 | Zmym5   |
| 34900 | -1.00619 | 9.797914 | -3.42128 | 0.00342  | 0.021617 | -1.86572 | Fuk     |
| 26172 | -1.00622 | 8.579675 | -3.78546 | 0.001575 | 0.014645 | -1.12975 | Sel1l   |
| 58513 | -1.00633 | 8.573558 | -3.13664 | 0.006256 | 0.030356 | -2.4346  | Runx1t1 |
| 27629 | -1.00636 | 11.51649 | -3.15566 | 0.006009 | 0.029609 | -2.39687 | Serbp1  |
| 22009 | -1.00653 | 12.91794 | -3.46099 | 0.003143 | 0.020649 | -1.78578 | Rnpepl1 |
| 18244 | -1.0066  | 10.51754 | -3.17757 | 0.005737 | 0.028836 | -2.35335 | Spata2  |
| 54747 | -1.00668 | 9.279596 | -3.8064  | 0.001506 | 0.014368 | -1.08731 | Slc38a3 |
| 11525 | -1.00673 | 13.66329 | -3.38283 | 0.003712 | 0.02261  | -1.94301 | Vps28   |
| 24940 | -1.00678 | 8.313235 | -3.92621 | 0.001167 | 0.012862 | -0.84456 | Rftn2   |
| 7872  | -1.00679 | 12.61379 | -2.94014 | 0.009459 | 0.038937 | -2.82125 | Sdf2    |
| 42334 | -1.00687 | 9.464268 | -3.35627 | 0.003927 | 0.023168 | -1.99635 | Zw10    |
| 40409 | -1.00694 | 9.128788 | -3.35017 | 0.003979 | 0.02337  | -2.00858 | Zfp217  |
| 61529 | -1.00697 | 12.63195 | -3.83859 | 0.001406 | 0.013923 | -1.02208 | Nedd8   |

|       |          |          |          |          |          |          |         |
|-------|----------|----------|----------|----------|----------|----------|---------|
| 42842 | -1.00709 | 8.519064 | -4.03237 | 0.000932 | 0.011726 | -0.6296  | Thrb    |
| 19581 | -1.00709 | 11.48685 | -3.4051  | 0.00354  | 0.021965 | -1.89826 | Eps15l1 |
| 52161 | -1.00712 | 9.472674 | -3.68182 | 0.001964 | 0.016154 | -1.33964 | Zfp64   |
| 32243 | -1.00712 | 14.40907 | -3.71375 | 0.001834 | 0.015584 | -1.27501 | Rps26   |
| 21986 | -1.00724 | 10.10017 | -3.64929 | 0.002105 | 0.016774 | -1.40548 | Isy1    |
| 37491 | -1.00729 | 9.106517 | -3.47892 | 0.003025 | 0.020334 | -1.74964 | Ints10  |
| 44161 | -1.00732 | 8.728616 | -3.78495 | 0.001576 | 0.014645 | -1.13077 | Zfp422  |
| 2820  | -1.00753 | 10.77996 | -3.60971 | 0.00229  | 0.017497 | -1.48555 | Sac3d1  |
| 58544 | -1.00757 | 8.946141 | -3.7413  | 0.00173  | 0.01522  | -1.21919 | Egln1   |
| 28937 | -1.0076  | 8.131939 | -3.92281 | 0.001176 | 0.012879 | -0.85143 | Hat1    |
| 2550  | -1.00762 | 13.77817 | -3.31739 | 0.004266 | 0.024348 | -2.07429 | Nudt3   |
| 42896 | -1.00762 | 11.01517 | -2.89718 | 0.010348 | 0.041204 | -2.90491 | Pcgf5   |
| 2025  | -1.00769 | 9.161692 | -3.89586 | 0.001245 | 0.013205 | -0.90605 | Unc119  |
| 57867 | -1.00777 | 10.80721 | -3.7908  | 0.001557 | 0.014594 | -1.11892 | Mylk3   |
| 55317 | -1.00788 | 9.031705 | -3.71838 | 0.001816 | 0.015541 | -1.26563 | Tmem136 |
| 17902 | -1.00792 | 10.5555  | -2.94178 | 0.009426 | 0.038863 | -2.81805 | Uchl4   |
| 46292 | -1.0081  | 14.78367 | -4.56504 | 0.000304 | 0.007532 | 0.441499 | Gm10653 |
| 12374 | -1.0082  | 10.38969 | -2.98321 | 0.008642 | 0.036742 | -2.73704 | Klhl13  |
| 10015 | -1.00828 | 8.995163 | -3.9074  | 0.001215 | 0.013117 | -0.88267 | Mkln1   |
| 378   | -1.00845 | 9.433612 | -3.88918 | 0.001263 | 0.013239 | -0.91957 | Acvr1b  |
| 22774 | -1.00846 | 10.94887 | -3.58935 | 0.002391 | 0.017889 | -1.52672 | Raly    |
| 30392 | -1.00847 | 12.66109 | -4.03773 | 0.000921 | 0.011697 | -0.61876 | Bsg     |
| 26713 | -1.00901 | 11.87592 | -2.97997 | 0.008701 | 0.036914 | -2.7434  | Sec62   |
| 27561 | -1.00908 | 10.59254 | -3.68521 | 0.001949 | 0.016103 | -1.33278 | Pex13   |
| 22842 | -1.00932 | 10.62904 | -3.44408 | 0.003258 | 0.021052 | -1.81983 | Utp11l  |
| 23711 | -1.0095  | 12.19936 | -3.24758 | 0.004947 | 0.026397 | -2.21388 | Dbnidd2 |

|       |          |          |          |          |          |          |               |
|-------|----------|----------|----------|----------|----------|----------|---------------|
| 57166 | -1.00953 | 13.62563 | -4.02041 | 0.000956 | 0.011851 | -0.6538  | Gm16477       |
| 54489 | -1.00985 | 10.58481 | -3.95478 | 0.001098 | 0.012517 | -0.78668 | Ttc4          |
| 28381 | -1.00991 | 10.00014 | -3.20651 | 0.005397 | 0.027769 | -2.29578 | Snap29        |
| 58366 | -1.00997 | 10.67759 | -3.36805 | 0.00383  | 0.022899 | -1.97269 | Gm16515       |
| 26304 | -1.01    | 8.037406 | -4.42988 | 0.000403 | 0.00847  | 0.171407 | Ppp2r3a       |
| 3696  | -1.01002 | 9.504922 | -3.39967 | 0.003581 | 0.02212  | -1.90918 | Gmnn          |
| 4111  | -1.01007 | 13.80631 | -4.44724 | 0.000388 | 0.008335 | 0.206176 | Rhot2         |
| 20402 | -1.0103  | 9.990238 | -3.88002 | 0.001288 | 0.013363 | -0.93813 | Wrap53        |
| 7198  | -1.01055 | 8.820898 | -3.39433 | 0.003622 | 0.022279 | -1.9199  | D030016E14Rik |
| 55381 | -1.01072 | 10.36805 | -3.16004 | 0.005954 | 0.029457 | -2.38817 | Fbxo38        |
| 30918 | -1.01084 | 13.23826 | -3.34691 | 0.004006 | 0.023439 | -2.01512 | Rps7          |
| 29394 | -1.01087 | 10.29778 | -4.47102 | 0.00037  | 0.00812  | 0.253767 | Gm13141       |
| 14923 | -1.01091 | 9.356912 | -3.44641 | 0.003242 | 0.020997 | -1.81514 | Maml1         |
| 29343 | -1.01103 | 9.669433 | -3.11871 | 0.006497 | 0.031022 | -2.47013 | Cmtm7         |
| 11372 | -1.01104 | 12.36923 | -3.30152 | 0.004412 | 0.024829 | -2.10608 | Rps6kb1       |
| 16001 | -1.01112 | 9.550411 | -3.97018 | 0.001063 | 0.012344 | -0.7555  | Acot8         |
| 47219 | -1.01138 | 8.884072 | -3.76407 | 0.001648 | 0.014898 | -1.17308 | Sike1         |
| 31914 | -1.01163 | 12.23663 | -3.55762 | 0.002558 | 0.018579 | -1.59084 | Smpx          |
| 60033 | -1.01165 | 8.994768 | -5.03434 | 0.000115 | 0.005645 | 1.366188 | Gpsm1         |
| 53014 | -1.01179 | 10.5664  | -3.07512 | 0.007123 | 0.032767 | -2.5563  | Cops2         |
| 50942 | -1.0119  | 9.466914 | -3.16757 | 0.00586  | 0.029223 | -2.37322 | Phactr1       |
| 12645 | -1.01199 | 9.157721 | -4.65435 | 0.000252 | 0.007106 | 0.619148 | LOC100504758  |
| 31891 | -1.01203 | 10.29994 | -2.7784  | 0.01325  | 0.048261 | -3.13425 | Glis2         |
| 31844 | -1.01204 | 9.074584 | -4.28733 | 0.000543 | 0.009554 | -0.11487 | Mgat4b        |
| 40558 | -1.01218 | 11.52301 | -3.42874 | 0.003366 | 0.021421 | -1.85071 | Herc1         |
| 15976 | -1.01226 | 12.4967  | -3.36564 | 0.00385  | 0.022932 | -1.97753 | Fbxo6         |

|       |          |          |          |          |          |          |          |
|-------|----------|----------|----------|----------|----------|----------|----------|
| 28195 | -1.01227 | 9.888155 | -3.53283 | 0.002697 | 0.019083 | -1.64088 | Srek1ip1 |
| 23039 | -1.0123  | 11.32023 | -2.9106  | 0.010062 | 0.040504 | -2.87881 | Inpp5j   |
| 61214 | -1.0125  | 10.9543  | -3.3537  | 0.003949 | 0.023245 | -2.00149 | Trp53i13 |
| 31547 | -1.01253 | 9.232569 | -3.66793 | 0.002023 | 0.016409 | -1.36778 | Stk16    |
| 9351  | -1.01259 | 10.39443 | -3.78815 | 0.001566 | 0.014632 | -1.1243  | Lztr1    |
| 39002 | -1.01271 | 10.01819 | -3.32125 | 0.004231 | 0.024256 | -2.06656 | Mll3     |
| 46521 | -1.01276 | 11.27271 | -3.92274 | 0.001176 | 0.012879 | -0.85158 | Ppp2ca   |
| 53545 | -1.01277 | 9.148525 | -3.29213 | 0.004501 | 0.025137 | -2.12486 | Krit1    |
| 27484 | -1.01279 | 9.262006 | -3.7649  | 0.001645 | 0.014895 | -1.1714  | Pex5     |
| 14626 | -1.01284 | 9.89107  | -4.41583 | 0.000415 | 0.008576 | 0.143241 | Gorasp1  |
| 16730 | -1.01292 | 15.01651 | -4.60543 | 0.000279 | 0.007327 | 0.521911 | Pfkm     |
| 49805 | -1.01305 | 8.599519 | -3.81392 | 0.001482 | 0.014282 | -1.07206 | Zfp933   |
| 30293 | -1.01313 | 9.778143 | -3.20945 | 0.005363 | 0.027693 | -2.28992 | Cramp11  |
| 15891 | -1.0132  | 9.077275 | -3.48163 | 0.003008 | 0.02028  | -1.74419 | Tmem201  |
| 22736 | -1.01337 | 9.574267 | -3.45654 | 0.003173 | 0.020745 | -1.79474 | Myst3    |
| 35796 | -1.01345 | 10.87369 | -3.1853  | 0.005644 | 0.028518 | -2.33798 | Emp2     |
| 60000 | -1.01349 | 7.767039 | -3.63129 | 0.002187 | 0.017104 | -1.4419  | Lrp4     |
| 19551 | -1.01362 | 10.56468 | -3.09774 | 0.006791 | 0.031887 | -2.51161 | Ralbp1   |
| 60028 | -1.01375 | 9.432731 | -4.38972 | 0.000438 | 0.008803 | 0.09089  | Kcna7    |
| 5841  | -1.01394 | 9.206268 | -3.16716 | 0.005865 | 0.029235 | -2.37404 | Akap11   |
| 19760 | -1.01409 | 9.634136 | -3.85253 | 0.001365 | 0.013751 | -0.99384 | Fgf9     |
| 6851  | -1.01447 | 12.62811 | -3.61518 | 0.002263 | 0.017388 | -1.47448 | Gcsh     |
| 17574 | -1.01447 | 10.36329 | -3.46116 | 0.003142 | 0.020649 | -1.78544 | Zdhhc16  |
| 24855 | -1.01457 | 12.36602 | -3.72296 | 0.001799 | 0.015473 | -1.25636 | Tspan7   |
| 47885 | -1.01462 | 10.03222 | -3.46747 | 0.0031   | 0.020535 | -1.77272 | Sf3a1    |
| 10677 | -1.01472 | 9.353273 | -3.84631 | 0.001383 | 0.013852 | -1.00644 | Abcc10   |



|       |          |          |          |          |          |          |               |
|-------|----------|----------|----------|----------|----------|----------|---------------|
| 9656  | -1.01477 | 11.35984 | -3.16043 | 0.005949 | 0.029452 | -2.38741 | Mib2          |
| 60585 | -1.01484 | 12.26038 | -4.16055 | 0.00071  | 0.010492 | -0.37047 | Stoml2        |
| 9541  | -1.01489 | 11.77719 | -3.2674  | 0.004743 | 0.025814 | -2.1743  | Lap3          |
| 48802 | -1.01506 | 11.86639 | -3.28898 | 0.004531 | 0.025185 | -2.13116 | Rer1          |
| 38334 | -1.0151  | 9.987634 | -3.47243 | 0.003067 | 0.020469 | -1.76273 | Zfp513        |
| 33726 | -1.0151  | 11.78924 | -3.22013 | 0.005243 | 0.02739  | -2.26864 | Lars          |
| 61247 | -1.01522 | 8.943135 | -3.29842 | 0.004441 | 0.02491  | -2.11227 | Gmcl1         |
| 62590 | -1.0153  | 9.172898 | -3.70421 | 0.001872 | 0.015712 | -1.29432 | Prkra         |
| 59658 | -1.01531 | 11.91608 | -3.07424 | 0.007136 | 0.032805 | -2.55803 | Fam40b        |
| 16042 | -1.0154  | 12.51975 | -3.43617 | 0.003314 | 0.021217 | -1.83575 | Numa1         |
| 1845  | -1.01592 | 15.47211 | -4.85415 | 0.000167 | 0.006078 | 1.013825 | Oaz1          |
| 9573  | -1.01618 | 9.346154 | -3.2306  | 0.005128 | 0.027031 | -2.24777 | Kcnj8         |
| 43414 | -1.0165  | 9.392396 | -2.84217 | 0.011606 | 0.044422 | -3.01149 | Dok4          |
| 19946 | -1.01659 | 10.18761 | -3.26902 | 0.004727 | 0.025804 | -2.17108 | Rars2         |
| 30358 | -1.0168  | 13.23067 | -3.32853 | 0.004166 | 0.024009 | -2.05196 | Arl2bp        |
| 18175 | -1.01681 | 10.50074 | -3.55294 | 0.002584 | 0.018673 | -1.60029 | Rps19bp1      |
| 51679 | -1.01681 | 9.561728 | -3.95224 | 0.001104 | 0.01252  | -0.79182 | Ncoa6         |
| 42701 | -1.01682 | 10.04317 | -3.37816 | 0.003749 | 0.022716 | -1.95239 | Tmem128       |
| 25584 | -1.01685 | 9.228166 | -3.51713 | 0.002789 | 0.019531 | -1.67258 | Fam134c       |
| 60415 | -1.01687 | 9.216395 | -3.47003 | 0.003083 | 0.020504 | -1.76755 | C030046E11Rik |
| 50386 | -1.017   | 11.28592 | -3.75466 | 0.001681 | 0.015038 | -1.19213 | Bphl          |
| 21680 | -1.01711 | 16.27106 | -5.99045 | 1.74E-05 | 0.002891 | 3.166244 | Lpl           |
| 8523  | -1.0172  | 11.21661 | -3.15065 | 0.006073 | 0.029782 | -2.40681 | Prps1         |
| 1626  | -1.01737 | 11.94778 | -2.89807 | 0.010329 | 0.041142 | -2.90318 | Oxnad1        |
| 4582  | -1.01745 | 11.98796 | -2.78525 | 0.013063 | 0.047832 | -3.12112 | Arhgef12      |
| 30514 | -1.01758 | 10.16666 | -3.31307 | 0.004305 | 0.024473 | -2.08294 | Polr1c        |

|       |          |          |          |          |          |          |        |
|-------|----------|----------|----------|----------|----------|----------|--------|
| 34642 | -1.01758 | 12.83739 | -3.80896 | 0.001498 | 0.014345 | -1.08213 | Glud1  |
| 17596 | -1.01761 | 9.587073 | -3.21363 | 0.005316 | 0.02756  | -2.28159 | Kat2b  |
| 14329 | -1.01772 | 15.122   | -3.99468 | 0.001009 | 0.012068 | -0.70589 | Cox8a  |
| 30469 | -1.01773 | 9.278538 | -3.30031 | 0.004423 | 0.024855 | -2.10848 | Ddx19b |
| 53125 | -1.01778 | 11.20602 | -3.43877 | 0.003295 | 0.021171 | -1.83051 | Rab24  |
| 35798 | -1.01781 | 10.77225 | -3.34907 | 0.003988 | 0.023388 | -2.0108  | Iars   |
| 28842 | -1.01783 | 12.62593 | -3.2387  | 0.005041 | 0.026724 | -2.23162 | R3hdm2 |
| 51099 | -1.01794 | 11.87768 | -3.09002 | 0.006903 | 0.032225 | -2.52689 | Pf4    |
| 6456  | -1.01802 | 12.6764  | -3.2824  | 0.004594 | 0.025403 | -2.14432 | Rnf6   |
| 53472 | -1.01821 | 9.958279 | -3.56021 | 0.002544 | 0.018513 | -1.5856  | Rnf38  |
| 14303 | -1.01847 | 10.49939 | -3.04984 | 0.007513 | 0.033886 | -2.60615 | Tmpo   |
| 15614 | -1.01853 | 16.10772 | -4.62226 | 0.00027  | 0.007254 | 0.555384 | Rplp2  |
| 4139  | -1.0186  | 9.464314 | -5.30226 | 6.72E-05 | 0.004775 | 1.882989 | Med25  |
| 30246 | -1.01877 | 8.107277 | -4.28446 | 0.000547 | 0.009563 | -0.12065 | Guf1   |
| 51042 | -1.01877 | 9.729892 | -3.67496 | 0.001992 | 0.01631  | -1.35353 | Btbd9  |
| 52519 | -1.01878 | 9.649965 | -3.83868 | 0.001406 | 0.013923 | -1.02191 | Repin1 |
| 2311  | -1.01882 | 11.40388 | -3.27973 | 0.004621 | 0.025459 | -2.14967 | Tmem9b |
| 50822 | -1.01903 | 8.365474 | -3.74997 | 0.001698 | 0.015061 | -1.20164 | Vps26b |
| 33921 | -1.01909 | 10.54711 | -3.40254 | 0.003559 | 0.022041 | -1.90341 | Actr8  |
| 32703 | -1.01911 | 8.23726  | -4.0325  | 0.000931 | 0.011726 | -0.62934 | L1td1  |
| 320   | -1.01915 | 10.40804 | -2.85557 | 0.011287 | 0.043702 | -2.98559 | Cryz   |
| 42514 | -1.01962 | 15.38878 | -5.17042 | 8.76E-05 | 0.005259 | 1.629775 | Atp2a2 |
| 41521 | -1.01966 | 9.530788 | -3.69479 | 0.00191  | 0.015897 | -1.31339 | Blmh   |
| 30936 | -1.01969 | 12.04487 | -3.28127 | 0.004606 | 0.025433 | -2.14659 | Eif3m  |
| 32654 | -1.01983 | 10.59051 | -3.72216 | 0.001802 | 0.015482 | -1.25797 | Gm3258 |
| 28557 | -1.01984 | 11.98496 | -3.6007  | 0.002334 | 0.017655 | -1.50377 | Eif1b  |

|       |          |          |          |          |          |          |          |
|-------|----------|----------|----------|----------|----------|----------|----------|
| 30638 | -1.02    | 11.35799 | -3.40542 | 0.003538 | 0.021962 | -1.89762 | Afg3l2   |
| 11209 | -1.02001 | 10.30563 | -3.04967 | 0.007516 | 0.033886 | -2.60649 | Snx2     |
| 30157 | -1.02021 | 12.30372 | -3.5695  | 0.002495 | 0.018332 | -1.56682 | Tmem134  |
| 25893 | -1.02023 | 8.945944 | -3.27983 | 0.00462  | 0.025459 | -2.14946 | Cog3     |
| 5939  | -1.02031 | 8.25222  | -4.35761 | 0.000469 | 0.009046 | 0.026433 | Dnd1     |
| 38200 | -1.02048 | 11.64294 | -2.84193 | 0.011612 | 0.04443  | -3.01196 | Nid1     |
| 25628 | -1.02063 | 11.4292  | -3.73669 | 0.001747 | 0.015272 | -1.22853 | Pin4     |
| 5624  | -1.02089 | 9.281586 | -3.03587 | 0.007737 | 0.034404 | -2.63366 | Tspan6   |
| 31252 | -1.02092 | 9.505699 | -3.17294 | 0.005794 | 0.029014 | -2.36255 | Ankrd27  |
| 56021 | -1.021   | 11.01535 | -3.52071 | 0.002768 | 0.019433 | -1.66536 | Irf1     |
| 50659 | -1.02117 | 14.83866 | -3.52377 | 0.00275  | 0.019343 | -1.65919 | Oaz2-ps  |
| 48724 | -1.02125 | 12.63149 | -3.57699 | 0.002455 | 0.018192 | -1.55169 | Rpl36a1  |
| 48614 | -1.02138 | 8.447975 | -4.79569 | 0.000188 | 0.006286 | 0.898759 | Siah2    |
| 56581 | -1.02147 | 10.28812 | -3.81473 | 0.001479 | 0.014273 | -1.07043 | Znrd1as  |
| 60119 | -1.02155 | 8.28846  | -3.70013 | 0.001888 | 0.015774 | -1.30259 | Purg     |
| 19032 | -1.02161 | 14.10215 | -4.1165  | 0.000779 | 0.010901 | -0.45945 | Psma2    |
| 8118  | -1.02166 | 15.23422 | -3.98961 | 0.00102  | 0.012136 | -0.71615 | Hsp90ab1 |
| 168   | -1.02166 | 10.4735  | -3.2842  | 0.004577 | 0.025351 | -2.14072 | Nck2     |
| 23634 | -1.02168 | 9.090318 | -4.06916 | 0.000862 | 0.011379 | -0.55517 | Mtcp1    |
| 27002 | -1.02199 | 10.02216 | -3.62234 | 0.002229 | 0.017254 | -1.46001 | Tm2d2    |
| 11243 | -1.02202 | 9.745563 | -2.85896 | 0.011207 | 0.043503 | -2.97903 | Acbd3    |
| 52420 | -1.02224 | 12.26508 | -3.77852 | 0.001598 | 0.014708 | -1.1438  | Tmx2     |
| 5651  | -1.02228 | 9.973487 | -3.02899 | 0.00785  | 0.034628 | -2.64719 | Exosc6   |
| 61887 | -1.02245 | 9.227635 | -3.82656 | 0.001443 | 0.014117 | -1.04645 | Tada2a   |
| 4115  | -1.02268 | 10.1396  | -3.59065 | 0.002385 | 0.01787  | -1.52409 | Gtf3c5   |
| 62775 | -1.02276 | 9.256381 | -3.56349 | 0.002527 | 0.018445 | -1.57898 | Snx15    |

|       |          |          |          |          |          |          |               |
|-------|----------|----------|----------|----------|----------|----------|---------------|
| 20245 | -1.02276 | 9.570017 | -3.56115 | 0.002539 | 0.018512 | -1.58371 | Stard13       |
| 49572 | -1.02281 | 10.13471 | -3.47986 | 0.003019 | 0.020329 | -1.74775 | Epc1          |
| 5925  | -1.02295 | 9.745414 | -3.9769  | 0.001048 | 0.012318 | -0.74189 | Ap3s2         |
| 31293 | -1.02308 | 14.88024 | -3.89111 | 0.001258 | 0.01323  | -0.91567 | Rpl27         |
| 10825 | -1.02308 | 9.790867 | -3.2495  | 0.004927 | 0.026341 | -2.21006 | Pdgfra        |
| 60357 | -1.02318 | 12.15064 | -3.73521 | 0.001752 | 0.015284 | -1.23153 | Larp4b        |
| 7264  | -1.0232  | 9.840879 | -4.22977 | 0.000614 | 0.010087 | -0.23082 | Srpr          |
| 26144 | -1.0233  | 9.521015 | -3.50595 | 0.002856 | 0.019739 | -1.69513 | Ccdc61        |
| 32293 | -1.02363 | 8.830601 | -3.36334 | 0.003869 | 0.02299  | -1.98215 | Whsc2         |
| 61431 | -1.02366 | 10.35879 | -3.7816  | 0.001588 | 0.014679 | -1.13757 | Nup133        |
| 42268 | -1.02371 | 10.50392 | -3.2364  | 0.005065 | 0.026796 | -2.23619 | Cdc5l         |
| 19047 | -1.02371 | 11.48338 | -3.43182 | 0.003344 | 0.021333 | -1.8445  | Rcsd1         |
| 53892 | -1.02373 | 9.034872 | -3.55428 | 0.002577 | 0.018638 | -1.59758 | D230037D09Rik |
| 46714 | -1.02397 | 8.114663 | -3.54386 | 0.002635 | 0.018815 | -1.61861 | Ccl7          |
| 16475 | -1.02407 | 7.848861 | -4.08892 | 0.000826 | 0.011211 | -0.5152  | Pgpep1        |
| 6804  | -1.0242  | 13.24089 | -4.55204 | 0.000312 | 0.007607 | 0.415573 | Cd36          |
| 36673 | -1.02422 | 9.599503 | -3.18247 | 0.005678 | 0.028617 | -2.34361 | Casp6         |
| 6672  | -1.02423 | 12.89253 | -3.22368 | 0.005204 | 0.027282 | -2.26156 | Nedd4         |
| 50744 | -1.02424 | 12.93698 | -3.64586 | 0.00212  | 0.016831 | -1.41243 | Qk            |
| 15543 | -1.02428 | 14.42485 | -3.48579 | 0.002981 | 0.020149 | -1.73578 | Cdc37         |
| 6922  | -1.02428 | 13.26982 | -3.48381 | 0.002994 | 0.020224 | -1.73979 | Lgmn          |
| 50941 | -1.02429 | 13.40058 | -2.82926 | 0.011922 | 0.045157 | -3.03642 | Crispld2      |
| 21984 | -1.02443 | 13.29699 | -3.89385 | 0.00125  | 0.013205 | -0.91011 | Erp29         |
| 59210 | -1.0245  | 9.920497 | -3.54947 | 0.002603 | 0.018753 | -1.6073  | Tbcel         |
| 54397 | -1.02452 | 10.8013  | -3.19484 | 0.005531 | 0.028177 | -2.319   | Exoc3         |
| 48043 | -1.02457 | 8.603325 | -3.46321 | 0.003128 | 0.020609 | -1.7813  | Tada1         |

|       |          |          |          |          |          |          |          |
|-------|----------|----------|----------|----------|----------|----------|----------|
| 19443 | -1.02477 | 8.977156 | -4.10325 | 0.000802 | 0.011077 | -0.48623 | Usp38    |
| 18012 | -1.02482 | 9.006265 | -3.56765 | 0.002504 | 0.018361 | -1.57056 | Isg2012  |
| 46626 | -1.02518 | 10.33835 | -3.74335 | 0.001722 | 0.015184 | -1.21505 | Ankrd17  |
| 44440 | -1.02521 | 9.143984 | -3.72767 | 0.001781 | 0.015384 | -1.2468  | Extl1    |
| 50434 | -1.02547 | 9.766476 | -3.49207 | 0.002942 | 0.019992 | -1.72313 | Zfp281   |
| 45916 | -1.02554 | 14.78743 | -3.44983 | 0.003219 | 0.020878 | -1.80824 | Rpl22    |
| 15708 | -1.02567 | 8.95932  | -4.21315 | 0.000635 | 0.0101   | -0.26433 | Surf2    |
| 41677 | -1.02568 | 11.44365 | -3.05598 | 0.007416 | 0.033562 | -2.59405 | Impdh2   |
| 1580  | -1.02573 | 12.13716 | -3.00273 | 0.008295 | 0.035868 | -2.69877 | Ebna1bp2 |
| 57918 | -1.02577 | 10.67061 | -3.81742 | 0.001471 | 0.014231 | -1.06499 | Ppp3cb   |
| 14342 | -1.02597 | 13.54188 | -4.00343 | 0.000991 | 0.012022 | -0.68818 | Gm6010   |
| 7534  | -1.02609 | 13.61916 | -3.88627 | 0.001271 | 0.013278 | -0.92547 | Srl      |
| 45281 | -1.0261  | 12.10856 | -3.85252 | 0.001365 | 0.013751 | -0.99385 | Robld3   |
| 30118 | -1.02617 | 9.33272  | -3.00665 | 0.008227 | 0.0357   | -2.69109 | Bcl3     |
| 50354 | -1.0262  | 9.91755  | -3.60215 | 0.002327 | 0.017641 | -1.50083 | Zfp386   |
| 35934 | -1.02644 | 10.32299 | -3.83315 | 0.001423 | 0.013978 | -1.03312 | Aamp     |
| 9684  | -1.02661 | 12.28925 | -3.51365 | 0.00281  | 0.019589 | -1.67961 | Pdcd6    |
| 22524 | -1.02664 | 10.52654 | -3.42475 | 0.003395 | 0.021507 | -1.85874 | Smarca5  |
| 4444  | -1.02666 | 10.03205 | -3.25162 | 0.004905 | 0.026261 | -2.20583 | Chfr     |
| 54233 | -1.02677 | 9.340678 | -3.46747 | 0.0031   | 0.020535 | -1.77272 | Gng12    |
| 41640 | -1.02689 | 9.956696 | -3.26067 | 0.004811 | 0.026008 | -2.18775 | Rab34    |
| 4752  | -1.02709 | 9.662765 | -3.28737 | 0.004546 | 0.025232 | -2.13438 | Sirt1    |
| 42574 | -1.0271  | 8.774017 | -4.08246 | 0.000838 | 0.011255 | -0.52826 | Pm20d1   |
| 30113 | -1.02713 | 12.7743  | -3.74498 | 0.001716 | 0.015149 | -1.21174 | Eif4h    |
| 59846 | -1.02716 | 9.524391 | -3.37025 | 0.003812 | 0.022879 | -1.96828 | Gramd4   |
| 50666 | -1.02727 | 11.04239 | -3.3765  | 0.003762 | 0.022767 | -1.95573 | Pmvk     |

|       |          |          |          |          |          |          |           |
|-------|----------|----------|----------|----------|----------|----------|-----------|
| 44701 | -1.0273  | 11.96244 | -3.5811  | 0.002434 | 0.01812  | -1.5434  | Sharpin   |
| 11898 | -1.02734 | 10.5685  | -3.12429 | 0.006421 | 0.030812 | -2.45908 | Cd82      |
| 29688 | -1.02742 | 11.27783 | -3.59758 | 0.00235  | 0.017719 | -1.51008 | Cep63     |
| 31498 | -1.02745 | 14.07969 | -4.6071  | 0.000278 | 0.007325 | 0.525238 | Prdx5     |
| 59034 | -1.02745 | 11.14562 | -3.58197 | 0.002429 | 0.018098 | -1.54163 | Oplah     |
| 32276 | -1.02754 | 7.516242 | -4.99308 | 0.000126 | 0.005707 | 1.285824 | Slc9a2    |
| 24570 | -1.02763 | 10.09492 | -3.14495 | 0.006147 | 0.030006 | -2.41813 | D8Ertd82e |
| 30629 | -1.02764 | 9.522309 | -3.53171 | 0.002704 | 0.019116 | -1.64314 | Zfml      |
| 9268  | -1.02776 | 9.748956 | -3.19546 | 0.005524 | 0.028163 | -2.31776 | Ctcf      |
| 22094 | -1.02795 | 9.335519 | -3.36901 | 0.003822 | 0.022879 | -1.97076 | Igdcc4    |
| 7205  | -1.0281  | 9.61588  | -3.2959  | 0.004465 | 0.024999 | -2.11731 | Lrig1     |
| 13962 | -1.02811 | 9.152453 | -3.64438 | 0.002127 | 0.016859 | -1.41542 | Extl2     |
| 27877 | -1.02821 | 10.62792 | -3.40258 | 0.003559 | 0.022041 | -1.90333 | Ctnnal1   |
| 16267 | -1.02834 | 12.68478 | -3.66856 | 0.00202  | 0.016408 | -1.36648 | Znhit1    |
| 16368 | -1.02881 | 11.72186 | -3.14879 | 0.006097 | 0.029849 | -2.41051 | Msl1      |
| 48117 | -1.02892 | 9.04896  | -4.05976 | 0.000879 | 0.011455 | -0.57418 | Nme4      |
| 54594 | -1.02911 | 8.486901 | -3.63552 | 0.002167 | 0.017052 | -1.43336 | Ei24      |
| 62770 | -1.02918 | 11.22637 | -3.00249 | 0.0083   | 0.03587  | -2.69925 | Rpap3     |
| 60121 | -1.02922 | 9.193599 | -3.94028 | 0.001133 | 0.012673 | -0.81606 | Vta1      |
| 5275  | -1.02993 | 11.35373 | -3.45923 | 0.003155 | 0.020669 | -1.78932 | Spin1     |
| 21564 | -1.02994 | 9.425205 | -3.26789 | 0.004738 | 0.025809 | -2.17333 | Fam13a    |
| 21229 | -1.03004 | 9.877701 | -3.39253 | 0.003636 | 0.022321 | -1.92353 | Ifrd2     |
| 35179 | -1.03008 | 10.94219 | -3.23352 | 0.005096 | 0.026909 | -2.24195 | Aagab     |
| 10428 | -1.03012 | 13.52249 | -3.17526 | 0.005765 | 0.028924 | -2.35793 | Eef1b2    |
| 33700 | -1.03024 | 10.25165 | -2.75421 | 0.013931 | 0.049965 | -3.18058 | Grasp     |
| 18467 | -1.03041 | 9.00983  | -3.89436 | 0.001249 | 0.013205 | -0.90908 | Cox18     |

|       |          |          |          |          |          |          |          |
|-------|----------|----------|----------|----------|----------|----------|----------|
| 46518 | -1.03042 | 9.444193 | -3.36968 | 0.003817 | 0.022879 | -1.96943 | Fanc1    |
| 58090 | -1.03092 | 11.31528 | -3.75465 | 0.001681 | 0.015038 | -1.19215 | ORF19    |
| 38651 | -1.03095 | 10.91071 | -4.1047  | 0.000799 | 0.01107  | -0.48331 | Parl     |
| 11438 | -1.03118 | 12.14094 | -3.50509 | 0.002861 | 0.019749 | -1.69687 | Abcc8    |
| 21374 | -1.0313  | 9.444468 | -3.44128 | 0.003278 | 0.021098 | -1.82546 | Tmem33   |
| 55424 | -1.03136 | 11.91085 | -3.59993 | 0.002338 | 0.017671 | -1.50532 | F11r     |
| 35893 | -1.03138 | 9.368383 | -3.06098 | 0.007339 | 0.033348 | -2.5842  | Psmc14   |
| 5109  | -1.03142 | 12.98059 | -3.86981 | 0.001316 | 0.013489 | -0.95882 | Higd2a   |
| 28478 | -1.03161 | 10.65189 | -3.77013 | 0.001627 | 0.014847 | -1.16079 | Arfgap2  |
| 26016 | -1.03168 | 10.69444 | -3.33702 | 0.004091 | 0.023741 | -2.03495 | Tmem188  |
| 31030 | -1.03176 | 11.41626 | -3.89199 | 0.001255 | 0.013211 | -0.91388 | Anxa11   |
| 28369 | -1.03179 | 13.21508 | -2.99742 | 0.008388 | 0.036093 | -2.70919 | Eif31    |
| 50508 | -1.03179 | 11.73784 | -2.89034 | 0.010497 | 0.041624 | -2.9182  | Airn     |
| 33138 | -1.03181 | 11.95079 | -3.5446  | 0.00263  | 0.018815 | -1.61712 | Glo1     |
| 26855 | -1.0319  | 9.807032 | -3.5602  | 0.002544 | 0.018513 | -1.58562 | Polg     |
| 50601 | -1.0319  | 9.641766 | -3.0916  | 0.00688  | 0.032145 | -2.52375 | Agps     |
| 10104 | -1.03195 | 10.31193 | -3.15564 | 0.00601  | 0.029609 | -2.39691 | Srp19    |
| 4426  | -1.03199 | 9.728835 | -3.0939  | 0.006847 | 0.032037 | -2.5192  | Aldh9a1  |
| 49095 | -1.032   | 10.6038  | -3.85454 | 0.001359 | 0.013742 | -0.98976 | Larp4    |
| 11358 | -1.03229 | 8.422012 | -4.23004 | 0.000613 | 0.010087 | -0.23028 | Gm1943   |
| 57542 | -1.03229 | 10.146   | -3.30898 | 0.004342 | 0.024603 | -2.09114 | Slc37a4  |
| 10806 | -1.03234 | 13.8665  | -2.98416 | 0.008625 | 0.036717 | -2.73519 | Itga7    |
| 13317 | -1.03243 | 11.54527 | -3.3679  | 0.003831 | 0.022899 | -1.97299 | Ppp3ca   |
| 51615 | -1.03259 | 13.5869  | -3.57357 | 0.002473 | 0.018272 | -1.5586  | Mrpl55   |
| 53891 | -1.03299 | 10.00263 | -3.55318 | 0.002583 | 0.018669 | -1.5998  | BC018507 |
| 8948  | -1.03302 | 12.05259 | -3.16751 | 0.005861 | 0.029223 | -2.37335 | Surf4    |

|       |          |          |          |          |          |          |               |
|-------|----------|----------|----------|----------|----------|----------|---------------|
| 5455  | -1.03308 | 12.51003 | -3.69174 | 0.001923 | 0.015958 | -1.31956 | Apoa1bp       |
| 56633 | -1.03312 | 9.964234 | -3.41272 | 0.003483 | 0.02179  | -1.88294 | Luc7l         |
| 61820 | -1.03314 | 14.27178 | -3.70805 | 0.001857 | 0.01565  | -1.28655 | Got2          |
| 5758  | -1.0334  | 10.61641 | -4.12978 | 0.000758 | 0.010755 | -0.43263 | Prpf19        |
| 53611 | -1.03355 | 8.526121 | -3.67486 | 0.001993 | 0.01631  | -1.35374 | Zfp661        |
| 6616  | -1.0336  | 10.02223 | -3.5999  | 0.002338 | 0.017671 | -1.50539 | Crls1         |
| 2871  | -1.03383 | 10.49078 | -3.89559 | 0.001246 | 0.013205 | -0.9066  | Pfdn2         |
| 57213 | -1.03384 | 12.03534 | -3.42417 | 0.003399 | 0.021521 | -1.85989 | Carkd         |
| 40654 | -1.03385 | 9.030945 | -3.06002 | 0.007354 | 0.033392 | -2.58609 | Thap1         |
| 23500 | -1.03387 | 13.36352 | -3.86838 | 0.00132  | 0.013502 | -0.96173 | Dtnbp1        |
| 22675 | -1.0339  | 9.823852 | -3.36024 | 0.003894 | 0.023047 | -1.98838 | Cnksr3        |
| 26103 | -1.03398 | 7.873714 | -4.84344 | 0.000171 | 0.006133 | 0.992777 | Lrrc39        |
| 56709 | -1.03402 | 12.0772  | -2.88259 | 0.010668 | 0.042106 | -2.93323 | Txn1          |
| 37840 | -1.03407 | 12.23775 | -3.11718 | 0.006518 | 0.031058 | -2.47315 | Prrc2b        |
| 11015 | -1.03408 | 13.2264  | -3.47641 | 0.003042 | 0.020394 | -1.75471 | Sumo1         |
| 31563 | -1.03408 | 10.59934 | -2.82582 | 0.012008 | 0.045351 | -3.04305 | Hexb          |
| 52893 | -1.03412 | 12.79152 | -3.31605 | 0.004278 | 0.024392 | -2.07697 | Bod1          |
| 61728 | -1.03423 | 9.37916  | -3.29903 | 0.004435 | 0.024891 | -2.11105 | Ercc2         |
| 22662 | -1.03423 | 10.79185 | -4.28886 | 0.000542 | 0.009554 | -0.1118  | Dnttip1       |
| 2194  | -1.03423 | 8.47716  | -3.79155 | 0.001554 | 0.014594 | -1.11739 | C330019G07Rik |
| 61869 | -1.03435 | 10.25286 | -3.49258 | 0.002939 | 0.019989 | -1.72209 | Arhgap23      |
| 29550 | -1.03436 | 9.46526  | -3.84352 | 0.001392 | 0.013865 | -1.0121  | Ykt6          |
| 57629 | -1.03446 | 11.3057  | -3.25541 | 0.004865 | 0.026153 | -2.19826 | Kbtbd2        |
| 20594 | -1.03447 | 11.85493 | -3.36501 | 0.003855 | 0.022938 | -1.97879 | Copb2         |
| 43574 | -1.03451 | 14.08467 | -3.90186 | 0.001229 | 0.013182 | -0.89388 | Rpl23a-ps1    |
| 36519 | -1.03472 | 8.906772 | -3.09173 | 0.006878 | 0.032145 | -2.5235  | Ntsr2         |



|       |          |          |          |          |          |          |          |
|-------|----------|----------|----------|----------|----------|----------|----------|
| 60777 | -1.03486 | 11.96292 | -4.06143 | 0.000876 | 0.011455 | -0.57081 | Narfl    |
| 17347 | -1.03494 | 9.567251 | -3.36319 | 0.00387  | 0.02299  | -1.98246 | Fbxl17   |
| 22253 | -1.03501 | 8.877124 | -3.76553 | 0.001643 | 0.014895 | -1.17013 | Daam1    |
| 42090 | -1.03513 | 11.60348 | -3.15602 | 0.006005 | 0.0296   | -2.39616 | Ube2r2   |
| 10132 | -1.03515 | 12.48777 | -3.73102 | 0.001768 | 0.015357 | -1.24002 | Neurl2   |
| 54419 | -1.03516 | 10.30326 | -3.21847 | 0.005261 | 0.027407 | -2.27194 | Fkbp7    |
| 22079 | -1.03522 | 8.003749 | -3.86709 | 0.001324 | 0.01351  | -0.96434 | Tec      |
| 27055 | -1.03527 | 10.00682 | -3.19713 | 0.005505 | 0.028109 | -2.31446 | Pramef8  |
| 15441 | -1.03547 | 7.763215 | -4.42039 | 0.000411 | 0.008563 | 0.152393 | Abcb7    |
| 21738 | -1.03549 | 10.02066 | -3.41477 | 0.003468 | 0.021743 | -1.87882 | Fam193b  |
| 35208 | -1.03567 | 11.12294 | -3.75838 | 0.001668 | 0.01499  | -1.18461 | Slc41a3  |
| 16291 | -1.03572 | 12.4406  | -4.6879  | 0.000235 | 0.006899 | 0.685676 | Atp5c1   |
| 13537 | -1.03574 | 10.93285 | -3.53769 | 0.002669 | 0.018977 | -1.63109 | Exosc5   |
| 29854 | -1.03576 | 9.433988 | -3.55405 | 0.002578 | 0.01864  | -1.59803 | Igsf8    |
| 14167 | -1.03577 | 13.82302 | -3.1501  | 0.00608  | 0.029806 | -2.4079  | Sepp1    |
| 33026 | -1.03586 | 9.3803   | -3.70054 | 0.001887 | 0.015769 | -1.30176 | Prkaa1   |
| 18334 | -1.03588 | 11.20779 | -3.6995  | 0.001891 | 0.015786 | -1.30385 | Fam98c   |
| 1313  | -1.03592 | 9.811206 | -3.36196 | 0.00388  | 0.023027 | -1.98492 | Nup37    |
| 39522 | -1.03598 | 9.680368 | -3.32748 | 0.004175 | 0.02405  | -2.05407 | Morc2a   |
| 58203 | -1.03599 | 11.54291 | -3.36327 | 0.003869 | 0.02299  | -1.9823  | BC024659 |
| 55449 | -1.03619 | 10.84099 | -4.25337 | 0.000584 | 0.009828 | -0.18327 | Mrps35   |
| 28990 | -1.03624 | 11.86736 | -3.71767 | 0.001819 | 0.015552 | -1.26706 | Prkaa2   |
| 4959  | -1.03626 | 11.6458  | -3.3564  | 0.003926 | 0.023168 | -1.99607 | Nsmce4a  |
| 46053 | -1.03626 | 9.818849 | -3.56575 | 0.002515 | 0.0184   | -1.57441 | Samd4b   |
| 54311 | -1.0364  | 11.44622 | -3.54985 | 0.002601 | 0.018753 | -1.60652 | Tomm20   |
| 6020  | -1.03645 | 13.95503 | -3.69535 | 0.001908 | 0.01589  | -1.31225 | Mrps23   |

|       |          |          |          |          |          |          |          |
|-------|----------|----------|----------|----------|----------|----------|----------|
| 58656 | -1.03656 | 9.204856 | -3.90405 | 0.001223 | 0.01316  | -0.88945 | Gpatch1  |
| 52314 | -1.03668 | 10.8397  | -3.75278 | 0.001688 | 0.015038 | -1.19594 | B3gnt1   |
| 19498 | -1.03673 | 8.493772 | -3.95126 | 0.001107 | 0.012525 | -0.79381 | Pex10    |
| 7497  | -1.03675 | 10.8533  | -3.04205 | 0.007637 | 0.034182 | -2.6215  | Nr1h3    |
| 7547  | -1.03679 | 9.748268 | -3.71635 | 0.001824 | 0.015558 | -1.26974 | Crot     |
| 47224 | -1.03679 | 13.36354 | -3.43342 | 0.003333 | 0.02129  | -1.84128 | Ctsl     |
| 36040 | -1.03682 | 11.35178 | -4.01752 | 0.000961 | 0.011911 | -0.65966 | Ccdc12   |
| 62611 | -1.03687 | 8.777385 | -4.181   | 0.00068  | 0.010327 | -0.3292  | Zfp866   |
| 20922 | -1.03691 | 11.9906  | -3.75164 | 0.001692 | 0.015038 | -1.19825 | Usp28    |
| 4728  | -1.03693 | 14.21225 | -3.6599  | 0.002057 | 0.016573 | -1.38402 | Ecsit    |
| 3037  | -1.03701 | 9.305733 | -3.27    | 0.004717 | 0.025783 | -2.16912 | Trim55   |
| 8562  | -1.03702 | 10.5033  | -4.09123 | 0.000822 | 0.011187 | -0.51054 | Msh2     |
| 4432  | -1.03712 | 9.805668 | -3.31037 | 0.00433  | 0.024568 | -2.08835 | Bcdin3d  |
| 15466 | -1.03726 | 9.529198 | -3.36121 | 0.003886 | 0.02303  | -1.98643 | AI597468 |
| 33625 | -1.03743 | 12.52254 | -3.76379 | 0.001649 | 0.014901 | -1.17365 | Erh      |
| 7337  | -1.03744 | 11.24658 | -2.89684 | 0.010356 | 0.041204 | -2.90557 | Uba2     |
| 8213  | -1.03749 | 11.61214 | -3.7269  | 0.001784 | 0.015393 | -1.24837 | Trappc1  |
| 46403 | -1.03768 | 11.00611 | -3.25502 | 0.004869 | 0.026163 | -2.19903 | Fam98a   |
| 45095 | -1.03775 | 11.27404 | -3.45098 | 0.003211 | 0.020878 | -1.80593 | Mcoln1   |
| 6920  | -1.0378  | 8.354348 | -4.00252 | 0.000993 | 0.012032 | -0.69002 | Gadd45a  |
| 59280 | -1.03785 | 11.20617 | -3.24711 | 0.004952 | 0.026398 | -2.21483 | Cdadcl   |
| 21683 | -1.03818 | 14.07548 | -4.99292 | 0.000126 | 0.005707 | 1.28551  | Slc25a3  |
| 17416 | -1.0382  | 8.372456 | -4.15571 | 0.000717 | 0.010555 | -0.38025 | Usp45    |
| 43171 | -1.03843 | 10.07429 | -3.89281 | 0.001253 | 0.013211 | -0.91222 | Atpaf2   |
| 32407 | -1.0385  | 10.23207 | -3.5728  | 0.002477 | 0.018289 | -1.56017 | Prps113  |
| 35105 | -1.03852 | 8.258071 | -3.83519 | 0.001416 | 0.013953 | -1.02897 | Cpne3    |

|       |          |          |          |          |          |          |         |
|-------|----------|----------|----------|----------|----------|----------|---------|
| 43286 | -1.03856 | 9.930514 | -3.6341  | 0.002174 | 0.017075 | -1.43622 | Gm3646  |
| 22857 | -1.03857 | 9.038266 | -3.64146 | 0.00214  | 0.01691  | -1.42134 | Hltf    |
| 13071 | -1.03863 | 9.485809 | -3.07202 | 0.00717  | 0.032919 | -2.56243 | Kat2a   |
| 39134 | -1.03871 | 10.97624 | -3.65679 | 0.002071 | 0.016636 | -1.39032 | Stk39   |
| 15279 | -1.03877 | 9.169005 | -3.57082 | 0.002487 | 0.018311 | -1.56416 | Ddx47   |
| 39618 | -1.03898 | 8.900545 | -3.38146 | 0.003723 | 0.022643 | -1.94576 | Klhl25  |
| 1817  | -1.0392  | 10.58265 | -3.46393 | 0.003123 | 0.020606 | -1.77984 | Tmem131 |
| 23421 | -1.03932 | 8.660375 | -3.95389 | 0.0011   | 0.01252  | -0.78848 | N6amt1  |
| 16674 | -1.03943 | 10.13985 | -3.35903 | 0.003904 | 0.023094 | -1.99081 | Rnf103  |
| 5549  | -1.03944 | 11.68374 | -2.81208 | 0.012356 | 0.046138 | -3.06954 | Samd1   |
| 33563 | -1.03944 | 8.076753 | -4.7458  | 0.000209 | 0.006636 | 0.800288 | Bik     |
| 51222 | -1.03979 | 9.723636 | -3.49489 | 0.002924 | 0.019934 | -1.71744 | Kpna4   |
| 46156 | -1.03999 | 8.819581 | -4.00451 | 0.000988 | 0.01201  | -0.68598 | Upf2    |
| 37720 | -1.04011 | 12.18355 | -3.36471 | 0.003858 | 0.022944 | -1.97941 | Ezh1    |
| 58201 | -1.04038 | 7.838694 | -4.20646 | 0.000644 | 0.010117 | -0.27782 | Cdk7    |
| 9648  | -1.04071 | 9.412634 | -3.2742  | 0.004675 | 0.025631 | -2.16071 | Csnk2a2 |
| 16502 | -1.04072 | 8.701075 | -4.42177 | 0.00041  | 0.008558 | 0.155155 | Cdk16   |
| 7564  | -1.04073 | 11.8609  | -3.18622 | 0.005633 | 0.028488 | -2.33616 | Rftn1   |
| 24104 | -1.04091 | 10.16923 | -3.61238 | 0.002277 | 0.017453 | -1.48016 | Ttc33   |
| 49949 | -1.04106 | 10.77886 | -3.43271 | 0.003338 | 0.021299 | -1.84271 | Sarnp   |
| 11943 | -1.04112 | 8.082738 | -4.56046 | 0.000307 | 0.007568 | 0.432372 | Plxnb3  |
| 20974 | -1.04132 | 13.50614 | -3.68516 | 0.00195  | 0.016103 | -1.33288 | Snrpd2  |
| 40446 | -1.04141 | 10.4947  | -3.1913  | 0.005573 | 0.028314 | -2.32604 | Hdac7   |
| 57760 | -1.04144 | 10.09358 | -4.48273 | 0.000361 | 0.008021 | 0.277178 | Neol    |
| 43921 | -1.04144 | 9.048326 | -3.87951 | 0.001289 | 0.013363 | -0.93916 | Polr2h  |
| 37325 | -1.04159 | 14.83585 | -5.3131  | 6.57E-05 | 0.004733 | 1.903712 | Atp5j   |

|       |          |          |          |          |          |          |          |
|-------|----------|----------|----------|----------|----------|----------|----------|
| 41396 | -1.04163 | 10.87839 | -3.03017 | 0.00783  | 0.034566 | -2.64487 | Gar1     |
| 43885 | -1.04171 | 10.42421 | -3.26382 | 0.004779 | 0.025911 | -2.18145 | Hsd17b11 |
| 61114 | -1.04171 | 8.683839 | -3.56438 | 0.002522 | 0.018434 | -1.57717 | Spice1   |
| 60131 | -1.04181 | 9.230827 | -3.88473 | 0.001275 | 0.013309 | -0.92859 | Gnb11    |
| 43920 | -1.04193 | 13.05048 | -3.73893 | 0.001739 | 0.015236 | -1.22399 | Mrpl52   |
| 16236 | -1.04195 | 12.0289  | -3.34995 | 0.00398  | 0.023375 | -2.00902 | Tmem93   |
| 46157 | -1.04197 | 10.17852 | -3.75947 | 0.001664 | 0.014971 | -1.1824  | Frs2     |
| 33824 | -1.04202 | 9.599309 | -3.98776 | 0.001024 | 0.012161 | -0.7199  | Kti12    |
| 53535 | -1.04205 | 11.17574 | -3.55711 | 0.002561 | 0.018592 | -1.59187 | Timm8a1  |
| 10953 | -1.04212 | 12.17036 | -4.12529 | 0.000765 | 0.010796 | -0.44169 | Dohh     |
| 44195 | -1.04225 | 13.05733 | -3.29065 | 0.004515 | 0.025162 | -2.12783 | Tmed2    |
| 55447 | -1.04252 | 10.87967 | -3.15766 | 0.005984 | 0.029531 | -2.3929  | Zfp710   |
| 26173 | -1.04265 | 7.80964  | -3.60794 | 0.002298 | 0.017522 | -1.48913 | Lypd2    |
| 8907  | -1.04316 | 8.660197 | -4.57568 | 0.000297 | 0.007471 | 0.462687 | Blcap    |
| 59067 | -1.04341 | 10.71821 | -3.49497 | 0.002924 | 0.019934 | -1.71727 | Cmtm6    |
| 34804 | -1.0439  | 12.98127 | -3.81156 | 0.00149  | 0.01431  | -1.07686 | Gm7555   |
| 23705 | -1.04404 | 10.09026 | -3.46048 | 0.003147 | 0.020649 | -1.7868  | Atf2     |
| 26062 | -1.04405 | 9.706945 | -3.5075  | 0.002847 | 0.019705 | -1.69201 | Mecp2    |
| 1530  | -1.0441  | 11.04278 | -3.51396 | 0.002808 | 0.019589 | -1.67898 | Arcn1    |
| 4192  | -1.04419 | 11.14256 | -3.18693 | 0.005625 | 0.028479 | -2.33474 | Ube2a    |
| 1266  | -1.04437 | 10.69631 | -3.07457 | 0.007132 | 0.032799 | -2.5574  | Nudt16l1 |
| 37800 | -1.04439 | 10.92789 | -3.80187 | 0.001521 | 0.014445 | -1.0965  | Gtf2a2   |
| 19688 | -1.04454 | 10.48426 | -3.39618 | 0.003608 | 0.022229 | -1.91619 | Srsf1    |
| 7018  | -1.04464 | 9.938868 | -3.87314 | 0.001307 | 0.013449 | -0.95207 | Add3     |
| 39721 | -1.04471 | 9.601188 | -3.78965 | 0.001561 | 0.014599 | -1.12125 | Ccdc28b  |
| 34332 | -1.04478 | 11.81604 | -2.7815  | 0.013165 | 0.04807  | -3.12832 | Ets2     |

|       |          |          |          |          |          |          |               |
|-------|----------|----------|----------|----------|----------|----------|---------------|
| 60286 | -1.0448  | 12.06741 | -3.70877 | 0.001854 | 0.01565  | -1.28509 | Sf3b5         |
| 11590 | -1.04483 | 9.509256 | -3.51781 | 0.002785 | 0.019516 | -1.67121 | Kbtbd12       |
| 6170  | -1.04513 | 9.97069  | -3.04369 | 0.007611 | 0.034071 | -2.61826 | Fem1b         |
| 36726 | -1.04519 | 10.31042 | -3.07349 | 0.007148 | 0.032846 | -2.55952 | Chchd8        |
| 2149  | -1.04524 | 11.57292 | -3.20796 | 0.00538  | 0.027742 | -2.29288 | Fam40a        |
| 60052 | -1.04535 | 11.94238 | -3.66095 | 0.002053 | 0.016561 | -1.3819  | Slc35b1       |
| 23895 | -1.04539 | 9.117554 | -4.36652 | 0.00046  | 0.008954 | 0.044317 | Rnmtl1        |
| 5352  | -1.04559 | 10.45893 | -3.27752 | 0.004642 | 0.025534 | -2.15409 | Ubn2          |
| 34958 | -1.04563 | 11.44215 | -3.58414 | 0.002418 | 0.018058 | -1.53725 | Rbfox2        |
| 46917 | -1.04587 | 13.51283 | -3.8823  | 0.001281 | 0.013352 | -0.93351 | Csda          |
| 38032 | -1.04594 | 12.63701 | -3.15551 | 0.006011 | 0.029609 | -2.39716 | Rbbp7         |
| 6555  | -1.04606 | 7.836881 | -4.4899  | 0.000355 | 0.007997 | 0.291519 | G630090E17Rik |
| 33394 | -1.04624 | 9.193373 | -3.28214 | 0.004597 | 0.025411 | -2.14484 | Gm3613        |
| 15274 | -1.04627 | 9.763394 | -3.44596 | 0.003245 | 0.021001 | -1.81603 | Ltbp1         |
| 18587 | -1.04632 | 9.543046 | -3.28934 | 0.004527 | 0.025178 | -2.13044 | Rpfl          |
| 41347 | -1.04643 | 13.17946 | -3.53212 | 0.002701 | 0.019106 | -1.64233 | Dnpep         |
| 43404 | -1.04644 | 9.153437 | -3.38812 | 0.00367  | 0.022463 | -1.93239 | Zfand6        |
| 24305 | -1.04652 | 10.44218 | -3.6542  | 0.002083 | 0.016684 | -1.39555 | Ankrd46       |
| 2184  | -1.04655 | 9.856503 | -4.09183 | 0.000821 | 0.01118  | -0.50932 | Btbd2         |
| 38578 | -1.04671 | 9.843937 | -3.44591 | 0.003246 | 0.021001 | -1.81614 | Setd6         |
| 55649 | -1.04671 | 8.145666 | -4.02263 | 0.000951 | 0.011806 | -0.64932 | Krt10         |
| 3817  | -1.04693 | 11.92722 | -3.29441 | 0.004479 | 0.025054 | -2.1203  | Son           |
| 25243 | -1.04693 | 8.385345 | -3.97134 | 0.00106  | 0.012341 | -0.75315 | Zfp341        |
| 28158 | -1.04695 | 9.268738 | -3.78615 | 0.001572 | 0.014645 | -1.12834 | Rcbtb2        |
| 59112 | -1.047   | 9.629943 | -3.57229 | 0.00248  | 0.018302 | -1.5612  | Gosr1         |
| 11814 | -1.04708 | 9.345098 | -4.73515 | 0.000213 | 0.006665 | 0.77922  | Fam193a       |

|       |          |          |          |          |          |          |          |
|-------|----------|----------|----------|----------|----------|----------|----------|
| 7988  | -1.04735 | 10.81851 | -3.47803 | 0.003031 | 0.020348 | -1.75144 | Gm15431  |
| 16882 | -1.04745 | 11.10777 | -3.23902 | 0.005037 | 0.026723 | -2.23098 | Psmc6    |
| 46124 | -1.04749 | 8.788125 | -4.24808 | 0.00059  | 0.009909 | -0.19392 | Zfp213   |
| 59300 | -1.0475  | 9.813294 | -3.28513 | 0.004568 | 0.025314 | -2.13886 | Ncapd2   |
| 3737  | -1.04756 | 9.598641 | -4.0045  | 0.000988 | 0.01201  | -0.68601 | Snrpn    |
| 51266 | -1.04794 | 11.12048 | -3.43737 | 0.003305 | 0.02121  | -1.83335 | Araf     |
| 20282 | -1.04799 | 10.11804 | -3.89998 | 0.001234 | 0.013201 | -0.8977  | BC024814 |
| 54765 | -1.04807 | 9.522157 | -3.674   | 0.001997 | 0.016322 | -1.35548 | Bcor     |
| 45919 | -1.0481  | 12.07402 | -3.12217 | 0.00645  | 0.030891 | -2.46328 | Csrp2    |
| 49085 | -1.04812 | 8.160141 | -4.50036 | 0.000348 | 0.007904 | 0.312423 | Gstm7    |
| 56493 | -1.04815 | 11.53754 | -3.44753 | 0.003234 | 0.020954 | -1.81289 | Cwc15    |
| 33474 | -1.04834 | 8.442822 | -4.18126 | 0.00068  | 0.010327 | -0.32867 | Abhd10   |
| 18716 | -1.04836 | 11.76932 | -4.59185 | 0.000287 | 0.007378 | 0.494905 | Pnkd     |
| 60129 | -1.04845 | 10.13449 | -4.55759 | 0.000308 | 0.007581 | 0.426648 | Pim3     |
| 32948 | -1.04857 | 9.246777 | -3.8359  | 0.001414 | 0.013953 | -1.02754 | Wdr83    |
| 16814 | -1.04858 | 8.210207 | -4.0294  | 0.000938 | 0.011752 | -0.63561 | Gmps     |
| 20838 | -1.04881 | 9.709411 | -3.7921  | 0.001553 | 0.01459  | -1.11629 | Exoc8    |
| 1305  | -1.04886 | 10.27634 | -3.095   | 0.006831 | 0.031983 | -2.51704 | Tmem129  |
| 12165 | -1.04897 | 11.64611 | -3.12004 | 0.006479 | 0.030969 | -2.4675  | Celf2    |
| 19245 | -1.04902 | 11.81035 | -3.14886 | 0.006097 | 0.029849 | -2.41038 | Fam136a  |
| 47478 | -1.04921 | 15.82088 | -5.49181 | 4.60E-05 | 0.004091 | 2.243052 | Ndufv1   |
| 22984 | -1.04923 | 11.90432 | -3.65046 | 0.002099 | 0.016751 | -1.40311 | Rpa1     |
| 38468 | -1.04929 | 13.83646 | -4.03466 | 0.000927 | 0.011716 | -0.62496 | Fastk    |
| 53260 | -1.04948 | 8.709536 | -4.19358 | 0.000662 | 0.010247 | -0.30381 | Mrps5    |
| 49365 | -1.0495  | 9.507781 | -3.79033 | 0.001558 | 0.014596 | -1.11987 | Nup54    |
| 34888 | -1.04967 | 9.586305 | -3.0524  | 0.007472 | 0.033761 | -2.60111 | Ebpl     |

|       |          |          |          |          |          |          |         |
|-------|----------|----------|----------|----------|----------|----------|---------|
| 19442 | -1.04968 | 9.598872 | -4.89495 | 0.000153 | 0.005923 | 1.093927 | Hemk1   |
| 49050 | -1.0497  | 11.04939 | -3.53096 | 0.002708 | 0.019129 | -1.64467 | Cept1   |
| 50558 | -1.04986 | 10.56656 | -3.23703 | 0.005059 | 0.026787 | -2.23495 | Ankra2  |
| 51353 | -1.04986 | 11.81673 | -3.64401 | 0.002128 | 0.016861 | -1.41618 | Armc1   |
| 17175 | -1.04989 | 10.63354 | -3.07828 | 0.007076 | 0.032645 | -2.55006 | Wtip    |
| 53830 | -1.04995 | 8.877609 | -4.06875 | 0.000862 | 0.011382 | -0.556   | Pnpt1   |
| 11066 | -1.05006 | 12.35757 | -3.65136 | 0.002095 | 0.016742 | -1.4013  | Asnsd1  |
| 59497 | -1.05014 | 10.48515 | -2.87223 | 0.010901 | 0.042788 | -2.95333 | Stag2   |
| 44719 | -1.05014 | 9.286725 | -3.70745 | 0.001859 | 0.01565  | -1.28776 | Sirt4   |
| 26368 | -1.05017 | 13.86051 | -3.74059 | 0.001733 | 0.015225 | -1.22065 | Nenf    |
| 61457 | -1.05035 | 10.22034 | -3.37312 | 0.003789 | 0.022849 | -1.96252 | Fkbp2   |
| 26222 | -1.05056 | 13.77663 | -3.26312 | 0.004786 | 0.025937 | -2.18285 | Psma3   |
| 18911 | -1.05059 | 8.879345 | -3.98133 | 0.001038 | 0.012262 | -0.73292 | Eif2b3  |
| 23683 | -1.05062 | 12.4385  | -3.56067 | 0.002542 | 0.018513 | -1.58466 | Hmg20b  |
| 15696 | -1.05082 | 14.47531 | -3.80127 | 0.001523 | 0.014454 | -1.0977  | Pgm2    |
| 18909 | -1.0509  | 14.05216 | -3.59399 | 0.002368 | 0.017794 | -1.51734 | Prdx6   |
| 44316 | -1.05103 | 12.24148 | -3.27852 | 0.004632 | 0.0255   | -2.15208 | Fam96a  |
| 4594  | -1.05106 | 15.15141 | -4.93294 | 0.000142 | 0.005859 | 1.16834  | Ndufv2  |
| 10345 | -1.05108 | 8.701855 | -4.43455 | 0.000399 | 0.008456 | 0.180764 | Nlrx1   |
| 35738 | -1.05113 | 8.997851 | -3.50831 | 0.002842 | 0.019701 | -1.69037 | Caprin2 |
| 39059 | -1.05142 | 8.965595 | -2.8517  | 0.011378 | 0.043924 | -2.99307 | Kcnip2  |
| 20304 | -1.05151 | 11.7455  | -4.00813 | 0.000981 | 0.011995 | -0.67865 | Mtx1    |
| 36235 | -1.05151 | 9.063983 | -3.53141 | 0.002705 | 0.019122 | -1.64375 | Dhx15   |
| 20936 | -1.05162 | 11.54361 | -3.12193 | 0.006453 | 0.030893 | -2.46375 | Ctnnd1  |
| 18885 | -1.05164 | 12.51555 | -3.76171 | 0.001656 | 0.014915 | -1.17785 | Eif2b4  |
| 1151  | -1.05166 | 14.71004 | -3.97475 | 0.001053 | 0.012334 | -0.74623 | Pkig    |

|       |          |          |          |          |          |          |          |
|-------|----------|----------|----------|----------|----------|----------|----------|
| 48879 | -1.05167 | 13.06773 | -3.6818  | 0.001964 | 0.016154 | -1.3397  | Arhgef7  |
| 23563 | -1.05171 | 8.543863 | -4.25671 | 0.00058  | 0.009789 | -0.17654 | Tmem82   |
| 4877  | -1.05188 | 9.065845 | -3.69354 | 0.001915 | 0.015915 | -1.31593 | Taf8     |
| 15075 | -1.05217 | 10.26994 | -3.42687 | 0.00338  | 0.021485 | -1.85447 | Ssna1    |
| 27290 | -1.05242 | 12.63725 | -3.2663  | 0.004754 | 0.025849 | -2.17651 | Murc     |
| 52793 | -1.05245 | 9.796563 | -4.05931 | 0.00088  | 0.011455 | -0.57509 | Nipa2    |
| 27458 | -1.05249 | 9.638252 | -3.63021 | 0.002192 | 0.017112 | -1.4441  | Dpcd     |
| 31265 | -1.05253 | 10.96203 | -3.70812 | 0.001857 | 0.01565  | -1.2864  | Apba3    |
| 42684 | -1.05288 | 9.160943 | -4.3565  | 0.00047  | 0.009047 | 0.024189 | Cno      |
| 30945 | -1.05312 | 14.08286 | -3.98447 | 0.001031 | 0.012226 | -0.72656 | Pptc7    |
| 38440 | -1.05332 | 8.407847 | -4.22001 | 0.000626 | 0.0101   | -0.2505  | Cd1d1    |
| 13419 | -1.05342 | 13.45091 | -3.55608 | 0.002567 | 0.018615 | -1.59395 | Hspa9    |
| 26427 | -1.05347 | 12.88821 | -3.86233 | 0.001337 | 0.013616 | -0.97397 | Egln2    |
| 52881 | -1.05348 | 14.55477 | -3.99147 | 0.001016 | 0.012109 | -0.71238 | Mtap7d1  |
| 14214 | -1.05363 | 8.458524 | -3.89419 | 0.001249 | 0.013205 | -0.90943 | Ppp6r3   |
| 9686  | -1.05382 | 12.251   | -3.74803 | 0.001705 | 0.015099 | -1.20557 | Dhx30    |
| 417   | -1.05382 | 12.26101 | -3.1283  | 0.006367 | 0.030632 | -2.45114 | Arhgap21 |
| 54143 | -1.05394 | 8.322028 | -4.69511 | 0.000232 | 0.006885 | 0.699972 | Dpyd     |
| 51299 | -1.05396 | 9.982636 | -3.2125  | 0.005328 | 0.027606 | -2.28384 | Fam63b   |
| 50603 | -1.05418 | 11.11522 | -3.43637 | 0.003312 | 0.021215 | -1.83536 | Osbp12   |
| 7310  | -1.05427 | 10.18931 | -3.08724 | 0.006944 | 0.032298 | -2.53238 | Usp15    |
| 39068 | -1.05445 | 13.83714 | -4.7175  | 0.000221 | 0.006791 | 0.744319 | Sgca     |
| 53262 | -1.05491 | 10.4592  | -3.39169 | 0.003643 | 0.022349 | -1.92522 | Nxt1     |
| 44188 | -1.05499 | 10.09941 | -3.80385 | 0.001514 | 0.014415 | -1.09248 | Kdm2b    |
| 17699 | -1.05525 | 10.00212 | -3.38423 | 0.003701 | 0.022568 | -1.9402  | Pdpr     |
| 3348  | -1.0553  | 11.65727 | -3.43634 | 0.003312 | 0.021215 | -1.83541 | Arl6ip5  |



|       |          |          |          |          |          |          |              |
|-------|----------|----------|----------|----------|----------|----------|--------------|
| 27152 | -1.05571 | 13.30389 | -3.36982 | 0.003816 | 0.022879 | -1.96914 | Tmem63b      |
| 42910 | -1.05578 | 9.35842  | -3.54591 | 0.002623 | 0.018788 | -1.61449 | Ino80d       |
| 4257  | -1.05582 | 11.44844 | -3.38351 | 0.003706 | 0.022585 | -1.94164 | Ttc19        |
| 55331 | -1.05582 | 10.57082 | -3.87927 | 0.00129  | 0.013363 | -0.93966 | Tbc1d16      |
| 10610 | -1.056   | 8.809012 | -4.46253 | 0.000376 | 0.008192 | 0.236785 | Vps33a       |
| 9040  | -1.05612 | 13.48063 | -3.87569 | 0.0013   | 0.013415 | -0.9469  | Bloc1s1      |
| 33806 | -1.05614 | 11.23401 | -3.35079 | 0.003973 | 0.023352 | -2.00734 | Tgfb2        |
| 27843 | -1.05632 | 9.857747 | -3.64968 | 0.002103 | 0.016767 | -1.40471 | Gtf3a        |
| 34471 | -1.0564  | 8.398396 | -4.08232 | 0.000838 | 0.011255 | -0.52855 | Tcfcp2       |
| 40859 | -1.05653 | 11.00116 | -3.14733 | 0.006116 | 0.029914 | -2.4134  | C2cd2l       |
| 53921 | -1.05657 | 10.72748 | -3.15961 | 0.005959 | 0.029462 | -2.38903 | Ankrd16      |
| 18757 | -1.05665 | 9.162853 | -3.03947 | 0.007679 | 0.034276 | -2.62658 | E2f3         |
| 62630 | -1.05689 | 14.79807 | -3.40089 | 0.003572 | 0.022085 | -1.90672 | Ctnna1       |
| 12586 | -1.05708 | 11.50214 | -3.03074 | 0.007821 | 0.034553 | -2.64376 | Top2b        |
| 45232 | -1.05718 | 8.919555 | -4.42562 | 0.000406 | 0.008514 | 0.162867 | Zfp868       |
| 8912  | -1.05731 | 9.437485 | -3.7561  | 0.001676 | 0.015024 | -1.18921 | Mzt1         |
| 31042 | -1.05763 | 12.80959 | -4.47949 | 0.000363 | 0.00805  | 0.2707   | Map1lc3a     |
| 19852 | -1.05802 | 12.85124 | -3.84351 | 0.001392 | 0.013865 | -1.01212 | Pdpf         |
| 2102  | -1.05804 | 10.58567 | -3.47902 | 0.003025 | 0.020334 | -1.74944 | Rnf111       |
| 29754 | -1.05815 | 11.43167 | -4.21447 | 0.000634 | 0.0101   | -0.26167 | Srp54c       |
| 23297 | -1.05827 | 10.67187 | -3.65164 | 0.002094 | 0.016739 | -1.40074 | Ola1         |
| 60353 | -1.05831 | 8.969678 | -4.08281 | 0.000837 | 0.011255 | -0.52755 | Clns1a       |
| 17312 | -1.05856 | 9.837652 | -3.2898  | 0.004523 | 0.025171 | -2.12952 | Haus4        |
| 57450 | -1.05863 | 11.50871 | -3.75297 | 0.001687 | 0.015038 | -1.19557 | LOC100046282 |
| 52859 | -1.05867 | 10.64832 | -3.42467 | 0.003396 | 0.021507 | -1.8589  | Tctex1d2     |
| 27465 | -1.05872 | 10.44297 | -3.06436 | 0.007287 | 0.033262 | -2.57753 | Kdm5b        |

|       |          |          |          |          |          |          |         |
|-------|----------|----------|----------|----------|----------|----------|---------|
| 38815 | -1.05878 | 11.88729 | -3.19057 | 0.005582 | 0.02835  | -2.32749 | U2af1   |
| 41939 | -1.05908 | 8.865576 | -3.99131 | 0.001016 | 0.012109 | -0.71271 | Helb    |
| 3151  | -1.05913 | 13.43634 | -3.40817 | 0.003517 | 0.021892 | -1.89209 | Creg1   |
| 22271 | -1.05921 | 8.998454 | -3.34728 | 0.004003 | 0.023433 | -2.01438 | Tgs1    |
| 4969  | -1.0595  | 13.32032 | -3.88717 | 0.001268 | 0.013271 | -0.92365 | Ndufa8  |
| 21713 | -1.0596  | 9.46312  | -4.60774 | 0.000278 | 0.007325 | 0.526507 | Tm9sf1  |
| 60858 | -1.05986 | 9.371274 | -3.6477  | 0.002112 | 0.016819 | -1.40871 | Nxt2    |
| 32381 | -1.05991 | 14.29667 | -3.76226 | 0.001654 | 0.014915 | -1.17674 | Gm9457  |
| 26446 | -1.06003 | 12.35765 | -3.3132  | 0.004304 | 0.024473 | -2.08269 | Nxf1    |
| 47851 | -1.06003 | 10.30607 | -3.2293  | 0.005142 | 0.027066 | -2.25035 | Exoc2   |
| 31589 | -1.06007 | 9.807557 | -4.54619 | 0.000316 | 0.007649 | 0.403922 | Rbfa    |
| 8814  | -1.06017 | 14.52528 | -4.08235 | 0.000838 | 0.011255 | -0.52849 | Txn2    |
| 39039 | -1.06018 | 12.56537 | -3.47947 | 0.003022 | 0.020329 | -1.74853 | Ccdc72  |
| 54303 | -1.06021 | 9.538292 | -4.30553 | 0.000523 | 0.009425 | -0.07826 | Zfp770  |
| 46902 | -1.06021 | 8.331384 | -3.50345 | 0.002871 | 0.01976  | -1.70017 | Mtap    |
| 16144 | -1.06029 | 12.39161 | -3.09554 | 0.006823 | 0.03196  | -2.51596 | Rbm39   |
| 39742 | -1.06033 | 10.28516 | -3.63485 | 0.00217  | 0.017058 | -1.43472 | Camsap1 |
| 26102 | -1.06053 | 8.935403 | -3.78725 | 0.001569 | 0.014645 | -1.12611 | Agk     |
| 44430 | -1.06059 | 11.28682 | -3.25754 | 0.004843 | 0.026079 | -2.194   | Nfe2l2  |
| 48095 | -1.0606  | 10.39115 | -4.11928 | 0.000775 | 0.010871 | -0.45383 | Denr    |
| 36212 | -1.06061 | 12.21533 | -4.26824 | 0.000566 | 0.009682 | -0.1533  | Ap1b1   |
| 18884 | -1.06072 | 13.62242 | -3.57694 | 0.002455 | 0.018192 | -1.55179 | Gm2099  |
| 27407 | -1.06094 | 13.25202 | -3.17003 | 0.00583  | 0.02914  | -2.36834 | Dnaja4  |
| 35280 | -1.06132 | 15.94917 | -3.59887 | 0.002343 | 0.017698 | -1.50746 | Hba-a1  |
| 36538 | -1.06144 | 8.409051 | -4.3666  | 0.00046  | 0.008954 | 0.044482 | Map2k6  |
| 34962 | -1.06148 | 11.57685 | -4.05246 | 0.000893 | 0.01149  | -0.58894 | Ythdf1  |

|       |          |          |          |          |          |          |           |
|-------|----------|----------|----------|----------|----------|----------|-----------|
| 4197  | -1.06161 | 9.418505 | -3.18989 | 0.00559  | 0.028359 | -2.32885 | Zfp238    |
| 33141 | -1.06168 | 11.34006 | -3.90808 | 0.001213 | 0.013108 | -0.88129 | Sms       |
| 60423 | -1.06178 | 11.15228 | -3.40063 | 0.003574 | 0.022088 | -1.90725 | Ociad1    |
| 17134 | -1.06206 | 10.11702 | -3.04507 | 0.007589 | 0.034024 | -2.61554 | Pigs      |
| 24254 | -1.06209 | 8.625007 | -3.43271 | 0.003338 | 0.021299 | -1.84272 | Tfdp1     |
| 24400 | -1.06217 | 11.73444 | -3.7798  | 0.001594 | 0.014702 | -1.14121 | Rab3a     |
| 41501 | -1.06232 | 10.36881 | -3.57113 | 0.002486 | 0.018311 | -1.56355 | Rnf181    |
| 12499 | -1.06236 | 11.23911 | -3.58283 | 0.002425 | 0.018084 | -1.53989 | Fam168b   |
| 24551 | -1.0627  | 10.16605 | -2.81897 | 0.01218  | 0.045755 | -3.05626 | Matn2     |
| 60830 | -1.06272 | 10.51107 | -3.91465 | 0.001196 | 0.013013 | -0.86798 | Ttc7      |
| 9931  | -1.06275 | 11.87763 | -3.62259 | 0.002228 | 0.017254 | -1.45951 | Gstp1     |
| 16221 | -1.06293 | 11.13153 | -3.6646  | 0.002037 | 0.016487 | -1.37451 | Taz       |
| 45532 | -1.06314 | 10.68809 | -4.12993 | 0.000758 | 0.010755 | -0.43233 | Rnf11     |
| 1249  | -1.06321 | 10.92355 | -3.94278 | 0.001127 | 0.012635 | -0.81099 | Gfm2      |
| 26481 | -1.06345 | 12.50929 | -2.83516 | 0.011777 | 0.044807 | -3.02503 | Jun       |
| 27881 | -1.06352 | 9.054252 | -3.44142 | 0.003277 | 0.021098 | -1.82519 | Pdelc     |
| 21583 | -1.06352 | 10.74261 | -3.33635 | 0.004097 | 0.023749 | -2.0363  | Osbp15    |
| 28654 | -1.06368 | 8.329126 | -4.08136 | 0.00084  | 0.011264 | -0.5305  | Nop16     |
| 29350 | -1.06379 | 14.02822 | -4.22697 | 0.000617 | 0.010087 | -0.23646 | Rpl7a-ps5 |
| 14139 | -1.06387 | 10.11287 | -3.42262 | 0.003411 | 0.02158  | -1.86302 | AW549877  |
| 685   | -1.06405 | 10.72353 | -3.72823 | 0.001779 | 0.015379 | -1.24566 | Suv420h2  |
| 23992 | -1.06416 | 12.67978 | -3.49434 | 0.002928 | 0.019951 | -1.71856 | Ank1      |
| 38821 | -1.06423 | 9.029213 | -3.59226 | 0.002376 | 0.017839 | -1.52083 | Olfml2b   |
| 31606 | -1.06444 | 11.97483 | -3.09831 | 0.006783 | 0.031869 | -2.51049 | Hnrnpc    |
| 6293  | -1.06454 | 10.78772 | -3.44069 | 0.003282 | 0.021115 | -1.82665 | Sertad2   |
| 34912 | -1.0648  | 9.056948 | -3.48737 | 0.002971 | 0.0201   | -1.73261 | Fbxo11    |

|       |          |          |          |          |          |          |         |
|-------|----------|----------|----------|----------|----------|----------|---------|
| 517   | -1.06492 | 10.37583 | -3.63932 | 0.00215  | 0.016969 | -1.42567 | Tpp2    |
| 40623 | -1.06505 | 8.923286 | -4.20481 | 0.000647 | 0.010126 | -0.28116 | Nrip1   |
| 14699 | -1.06519 | 8.195281 | -4.65357 | 0.000253 | 0.007106 | 0.61758  | Prkab1  |
| 9601  | -1.06563 | 9.82775  | -3.42497 | 0.003394 | 0.021507 | -1.85829 | Oxr1    |
| 34084 | -1.06566 | 10.5178  | -3.32381 | 0.004208 | 0.024181 | -2.06142 | Tgfr3   |
| 49676 | -1.06567 | 11.56169 | -3.05601 | 0.007416 | 0.033562 | -2.59399 | Csnk1a1 |
| 38574 | -1.06571 | 8.21672  | -4.07936 | 0.000843 | 0.011277 | -0.53454 | C1qtnf4 |
| 38216 | -1.06572 | 9.700291 | -4.82573 | 0.000177 | 0.006166 | 0.957932 | Gtf3c1  |
| 5153  | -1.06626 | 11.9769  | -3.26241 | 0.004794 | 0.025958 | -2.18427 | Klc2    |
| 45271 | -1.06635 | 9.725705 | -3.8264  | 0.001443 | 0.014117 | -1.04678 | Nipa1   |
| 42918 | -1.06651 | 12.14831 | -3.89556 | 0.001246 | 0.013205 | -0.90665 | Obsl1   |
| 10297 | -1.06661 | 8.996438 | -3.66817 | 0.002022 | 0.016409 | -1.36729 | Ccdc91  |
| 44866 | -1.06674 | 12.57455 | -3.67405 | 0.001996 | 0.016322 | -1.35537 | Fnta    |
| 58854 | -1.06723 | 11.68556 | -4.00151 | 0.000995 | 0.012039 | -0.69206 | Agpat6  |
| 34409 | -1.06727 | 11.82739 | -2.94469 | 0.009369 | 0.038726 | -2.81237 | Arpc5l  |
| 19262 | -1.06743 | 10.36097 | -3.12304 | 0.006438 | 0.030866 | -2.46155 | Jmjd1c  |
| 4704  | -1.06752 | 11.04824 | -2.79201 | 0.012881 | 0.047441 | -3.10812 | Thy1    |
| 58889 | -1.06756 | 10.62165 | -3.72863 | 0.001777 | 0.015378 | -1.24486 | Tsen15  |
| 31730 | -1.06767 | 11.24743 | -4.06008 | 0.000878 | 0.011455 | -0.57353 | Sh2b1   |
| 8530  | -1.06774 | 13.67244 | -4.21797 | 0.000629 | 0.0101   | -0.25462 | Cpt1b   |
| 14724 | -1.06786 | 9.908949 | -3.71626 | 0.001825 | 0.015558 | -1.26992 | Rasgrp2 |
| 59961 | -1.06791 | 8.032194 | -4.22019 | 0.000626 | 0.0101   | -0.25014 | Car2    |
| 6548  | -1.06798 | 9.741455 | -3.06141 | 0.007332 | 0.033344 | -2.58336 | Bdp1    |
| 21441 | -1.06803 | 13.11982 | -3.31496 | 0.004288 | 0.024443 | -2.07916 | Cdk2ap1 |
| 21992 | -1.06806 | 9.932238 | -4.14636 | 0.000732 | 0.010607 | -0.39912 | Rbm6    |
| 13629 | -1.06807 | 9.892224 | -3.73733 | 0.001745 | 0.015258 | -1.22724 | Commd8  |

|       |          |          |          |          |          |          |          |
|-------|----------|----------|----------|----------|----------|----------|----------|
| 52100 | -1.06817 | 11.76819 | -3.31137 | 0.00432  | 0.024535 | -2.08636 | Tsnax    |
| 51433 | -1.06821 | 14.26295 | -4.06747 | 0.000865 | 0.011399 | -0.55858 | Acox1    |
| 46419 | -1.06873 | 11.63748 | -4.34251 | 0.000484 | 0.00913  | -0.00391 | Gm6133   |
| 10602 | -1.0688  | 9.12321  | -3.90152 | 0.00123  | 0.013186 | -0.89458 | Hexim1   |
| 28166 | -1.06883 | 9.074437 | -4.18155 | 0.000679 | 0.010327 | -0.32809 | Med22    |
| 53563 | -1.06892 | 13.5323  | -4.10606 | 0.000797 | 0.011056 | -0.48055 | Gm4825   |
| 10386 | -1.06931 | 10.11265 | -3.74593 | 0.001713 | 0.015125 | -1.20983 | Fip1l1   |
| 10459 | -1.06935 | 13.09754 | -3.47423 | 0.003056 | 0.020437 | -1.7591  | Mrpl48   |
| 28075 | -1.06993 | 10.33432 | -4.30725 | 0.000521 | 0.009398 | -0.07479 | Tnfaip2  |
| 19941 | -1.07015 | 10.85433 | -2.9771  | 0.008754 | 0.037072 | -2.749   | Glt8d1   |
| 59289 | -1.07023 | 9.851038 | -3.14702 | 0.00612  | 0.029914 | -2.41402 | Rabgap1l |
| 61999 | -1.07039 | 14.48385 | -4.7722  | 0.000198 | 0.006509 | 0.852431 | Brp44    |
| 51201 | -1.07044 | 9.457676 | -3.78708 | 0.001569 | 0.014645 | -1.12645 | Gm8801   |
| 30479 | -1.07069 | 9.059117 | -3.85964 | 0.001345 | 0.013644 | -0.97943 | Zfp277   |
| 8618  | -1.07074 | 8.624661 | -3.30363 | 0.004392 | 0.024763 | -2.10185 | Stard3nl |
| 34755 | -1.07088 | 8.689563 | -3.2654  | 0.004763 | 0.025854 | -2.1783  | Zmat1    |
| 15457 | -1.07101 | 13.5676  | -2.98829 | 0.008551 | 0.036518 | -2.72709 | Fabp5l2  |
| 4955  | -1.07107 | 14.23205 | -3.74054 | 0.001733 | 0.015225 | -1.22075 | Nisch    |
| 58036 | -1.07125 | 11.63546 | -3.35814 | 0.003912 | 0.023119 | -1.99259 | Guk1     |
| 41140 | -1.07125 | 9.516794 | -2.94834 | 0.009298 | 0.038591 | -2.80525 | Lrrk2    |
| 42113 | -1.07146 | 10.73333 | -3.51039 | 0.002829 | 0.019655 | -1.68617 | Cdkn2d   |
| 395   | -1.07152 | 10.5036  | -3.61016 | 0.002288 | 0.017493 | -1.48464 | Zscan21  |
| 40437 | -1.07184 | 9.261153 | -3.18578 | 0.005639 | 0.028495 | -2.33702 | Rassf3   |
| 48562 | -1.07199 | 11.52226 | -4.12975 | 0.000758 | 0.010755 | -0.43268 | Snrpd3   |
| 12363 | -1.072   | 10.75708 | -4.19397 | 0.000662 | 0.010247 | -0.30302 | Naa10    |
| 28832 | -1.072   | 8.641635 | -2.96022 | 0.009069 | 0.037987 | -2.78204 | Ccl24    |

|       |          |          |          |          |          |          |              |
|-------|----------|----------|----------|----------|----------|----------|--------------|
| 47996 | -1.07205 | 11.43674 | -3.6245  | 0.002219 | 0.017241 | -1.45564 | Asb10        |
| 19324 | -1.07209 | 11.92841 | -3.33883 | 0.004076 | 0.023681 | -2.03132 | Zcchc24      |
| 20607 | -1.07209 | 14.42306 | -4.02646 | 0.000943 | 0.011762 | -0.64156 | LOC100504872 |
| 32830 | -1.07213 | 9.545755 | -3.72252 | 0.001801 | 0.015476 | -1.25724 | Snx14        |
| 44744 | -1.07213 | 11.81308 | -3.56086 | 0.002541 | 0.018512 | -1.58428 | Ccnl2        |
| 58665 | -1.07226 | 10.86883 | -4.00604 | 0.000985 | 0.01201  | -0.68289 | Unc45a       |
| 8     | -1.07234 | 11.31514 | -3.50772 | 0.002845 | 0.019705 | -1.69157 | C85492       |
| 4859  | -1.07238 | 8.297334 | -3.80118 | 0.001523 | 0.014454 | -1.09789 | Sec23a       |
| 44700 | -1.07241 | 8.447666 | -5.02857 | 0.000117 | 0.005645 | 1.35495  | Mto1         |
| 16837 | -1.07261 | 8.239242 | -3.9328  | 0.001151 | 0.012818 | -0.83121 | Sema5a       |
| 51825 | -1.07268 | 10.65121 | -4.63219 | 0.000264 | 0.007219 | 0.575128 | Mrpl38       |
| 42143 | -1.07273 | 9.607839 | -4.07336 | 0.000854 | 0.011339 | -0.54667 | Psmg3        |
| 12691 | -1.07281 | 11.36395 | -3.69588 | 0.001906 | 0.015885 | -1.31119 | Foxj3        |
| 12683 | -1.07292 | 12.5152  | -3.07743 | 0.007089 | 0.032663 | -2.55174 | Sipa1l2      |
| 25747 | -1.07338 | 8.252068 | -4.07268 | 0.000855 | 0.011339 | -0.54805 | Prepl        |
| 24270 | -1.07341 | 8.799282 | -3.79424 | 0.001545 | 0.014574 | -1.11194 | Zfp644       |
| 763   | -1.07349 | 12.83134 | -4.54262 | 0.000318 | 0.007663 | 0.396784 | Asb11        |
| 20069 | -1.07354 | 8.01477  | -4.78989 | 0.000191 | 0.006332 | 0.88732  | Zfp128       |
| 48705 | -1.07376 | 9.577798 | -3.41702 | 0.003451 | 0.021703 | -1.87429 | Hmg20a       |
| 32167 | -1.07386 | 11.16474 | -3.49346 | 0.002933 | 0.019964 | -1.72033 | Lmo4         |
| 42987 | -1.07397 | 9.156413 | -4.11454 | 0.000783 | 0.010932 | -0.46343 | Rhobtb3      |
| 14572 | -1.07405 | 15.85145 | -4.93921 | 0.00014  | 0.005859 | 1.180618 | Hrc          |
| 17002 | -1.0741  | 9.976017 | -3.29935 | 0.004432 | 0.02488  | -2.11042 | Cdk2ap2      |
| 13635 | -1.07417 | 11.9645  | -3.10717 | 0.006658 | 0.0315   | -2.49297 | Bicc1        |
| 16088 | -1.0742  | 10.42189 | -3.63028 | 0.002192 | 0.017112 | -1.44395 | Aftph        |
| 43066 | -1.07437 | 15.32129 | -4.91852 | 0.000146 | 0.005905 | 1.140124 | Got1         |

|       |          |          |          |          |          |          |          |
|-------|----------|----------|----------|----------|----------|----------|----------|
| 18818 | -1.07446 | 12.42398 | -3.25395 | 0.00488  | 0.026189 | -2.20118 | Snrpg    |
| 23439 | -1.07449 | 10.0366  | -3.13711 | 0.00625  | 0.030342 | -2.43368 | Casp9    |
| 18003 | -1.07451 | 8.045783 | -4.16281 | 0.000707 | 0.010472 | -0.36591 | Zfp11    |
| 40827 | -1.07452 | 9.143818 | -2.99569 | 0.008419 | 0.036197 | -2.71259 | Slc22a17 |
| 14301 | -1.07458 | 10.26011 | -3.53905 | 0.002662 | 0.018958 | -1.62832 | Nup107   |
| 9090  | -1.07462 | 9.894332 | -3.38777 | 0.003673 | 0.022467 | -1.93308 | Gfpt1    |
| 784   | -1.07467 | 13.37918 | -3.8998  | 0.001235 | 0.013201 | -0.89806 | Psmc12   |
| 36123 | -1.07512 | 10.7214  | -3.7095  | 0.001851 | 0.01565  | -1.28361 | P2ry2    |
| 19314 | -1.07522 | 7.190695 | -2.7863  | 0.013035 | 0.04776  | -3.11909 | Prss12   |
| 36413 | -1.07562 | 9.782181 | -3.61131 | 0.002282 | 0.017474 | -1.48231 | Colec11  |
| 42893 | -1.07575 | 10.7735  | -3.47679 | 0.003039 | 0.020389 | -1.75393 | Pcmt1    |
| 41627 | -1.07582 | 11.65945 | -3.03842 | 0.007696 | 0.034319 | -2.62864 | Pop7     |
| 14858 | -1.07603 | 11.4425  | -3.0229  | 0.007951 | 0.034927 | -2.65915 | Thrsp    |
| 37197 | -1.07604 | 12.54342 | -3.62434 | 0.002219 | 0.017241 | -1.45596 | Fech     |
| 14061 | -1.07629 | 11.66931 | -3.72987 | 0.001773 | 0.01537  | -1.24234 | Hyal2    |
| 53148 | -1.07644 | 10.98586 | -3.71849 | 0.001816 | 0.015541 | -1.26541 | Aven     |
| 16294 | -1.07645 | 9.688393 | -4.61068 | 0.000276 | 0.007325 | 0.532364 | Gde1     |
| 4035  | -1.07646 | 11.49323 | -2.92979 | 0.009666 | 0.03948  | -2.84144 | Rad21    |
| 53820 | -1.07647 | 10.22489 | -4.28958 | 0.000541 | 0.009554 | -0.11035 | Mrpl9    |
| 32219 | -1.07658 | 12.61651 | -3.70646 | 0.001863 | 0.015673 | -1.28976 | Gps1     |
| 16451 | -1.07665 | 13.60194 | -3.4704  | 0.003081 | 0.020494 | -1.76681 | Calm2    |
| 33970 | -1.07713 | 9.353899 | -4.22509 | 0.00062  | 0.010087 | -0.24026 | Parp8    |
| 13096 | -1.07717 | 13.35684 | -2.90276 | 0.010228 | 0.040896 | -2.89405 | Lmod3    |
| 34125 | -1.07738 | 13.81197 | -4.17972 | 0.000682 | 0.010327 | -0.33178 | Mrpl12   |
| 51581 | -1.07751 | 11.58463 | -3.57179 | 0.002482 | 0.018311 | -1.5622  | Cd320    |
| 41434 | -1.07754 | 9.792976 | -3.6629  | 0.002044 | 0.016522 | -1.37795 | Txnrd3   |

|       |          |          |          |          |          |          |          |
|-------|----------|----------|----------|----------|----------|----------|----------|
| 6021  | -1.07767 | 9.273609 | -2.94124 | 0.009437 | 0.038872 | -2.81911 | Hlf      |
| 42173 | -1.07771 | 11.51365 | -4.18676 | 0.000672 | 0.01029  | -0.31756 | Mcat     |
| 44940 | -1.07773 | 8.073975 | -3.81877 | 0.001467 | 0.014216 | -1.06225 | Fam117a  |
| 38782 | -1.07776 | 11.64815 | -3.49842 | 0.002902 | 0.019868 | -1.71033 | Zwint    |
| 27455 | -1.0778  | 8.531593 | -4.1321  | 0.000754 | 0.010744 | -0.42794 | Rasd2    |
| 48399 | -1.07782 | 12.30349 | -3.6214  | 0.002233 | 0.017264 | -1.4619  | Ube2d3   |
| 4719  | -1.07787 | 11.01713 | -3.37208 | 0.003798 | 0.022874 | -1.96461 | Ube2e1   |
| 55328 | -1.07792 | 9.408295 | -4.45205 | 0.000385 | 0.008288 | 0.2158   | Slc44a1  |
| 22490 | -1.07793 | 10.56924 | -3.29429 | 0.00448  | 0.025054 | -2.12055 | Dusp12   |
| 48734 | -1.07798 | 11.86611 | -4.07735 | 0.000847 | 0.011298 | -0.53861 | Lmf1     |
| 53320 | -1.07804 | 12.44006 | -4.75695 | 0.000204 | 0.006618 | 0.822306 | Pink1    |
| 20567 | -1.07814 | 8.169213 | -3.78555 | 0.001574 | 0.014645 | -1.12955 | Ankrd34a |
| 53474 | -1.07818 | 14.85129 | -5.0886  | 0.000103 | 0.0055   | 1.471556 | Myoz2    |
| 26711 | -1.07824 | 9.298011 | -3.97485 | 0.001053 | 0.012334 | -0.74605 | Smcr8    |
| 18424 | -1.07829 | 8.648314 | -4.08488 | 0.000833 | 0.011248 | -0.52337 | Zfp961   |
| 50448 | -1.07836 | 12.08639 | -4.74041 | 0.000211 | 0.006665 | 0.789622 | Dnajc4   |
| 36554 | -1.07844 | 8.420488 | -2.75603 | 0.013878 | 0.049847 | -3.17709 | Prr15    |
| 10508 | -1.07845 | 8.093811 | -3.2849  | 0.00457  | 0.02532  | -2.13933 | Col4a6   |
| 39785 | -1.07861 | 9.878542 | -3.93108 | 0.001155 | 0.012818 | -0.83468 | Synj2    |
| 41725 | -1.07862 | 10.96742 | -3.71532 | 0.001828 | 0.01557  | -1.27181 | Ndufaf1  |
| 31677 | -1.07868 | 10.18796 | -4.15011 | 0.000726 | 0.010601 | -0.39155 | Nme6     |
| 22130 | -1.07878 | 15.83926 | -3.99953 | 0.000999 | 0.012047 | -0.69607 | Rpl9     |
| 34232 | -1.0788  | 15.98881 | -5.5607  | 4.02E-05 | 0.003964 | 2.372697 | Ndufb11  |
| 21620 | -1.07889 | 11.89293 | -3.672   | 0.002005 | 0.016353 | -1.35953 | Pcnt     |
| 58701 | -1.07905 | 10.38373 | -3.8118  | 0.001489 | 0.014309 | -1.07637 | Dnajc8   |
| 52439 | -1.07963 | 11.83978 | -2.85647 | 0.011266 | 0.04365  | -2.98385 | Zfp3612  |



|       |          |          |          |          |          |          |         |
|-------|----------|----------|----------|----------|----------|----------|---------|
| 2521  | -1.07964 | 12.43077 | -3.32313 | 0.004214 | 0.02421  | -2.0628  | Atp6v0e |
| 15645 | -1.07966 | 10.19822 | -4.14569 | 0.000733 | 0.010611 | -0.40048 | Tmem205 |
| 7949  | -1.0797  | 11.26338 | -3.08778 | 0.006936 | 0.032282 | -2.5313  | Parp6   |
| 37497 | -1.0797  | 11.46215 | -4.05268 | 0.000892 | 0.01149  | -0.5885  | Slc2a8  |
| 3526  | -1.07975 | 13.56703 | -3.40925 | 0.003509 | 0.021889 | -1.88991 | Spg7    |
| 60402 | -1.07979 | 9.936489 | -3.47101 | 0.003077 | 0.020486 | -1.76559 | Atf1    |
| 62918 | -1.08012 | 9.814118 | -3.48258 | 0.003002 | 0.020256 | -1.74225 | Srp72   |
| 48358 | -1.0803  | 9.838467 | -3.44878 | 0.003226 | 0.02091  | -1.81036 | Hrasls  |
| 9944  | -1.08046 | 9.641715 | -4.00746 | 0.000982 | 0.011995 | -0.68001 | Sphk2   |
| 16248 | -1.08048 | 9.343608 | -4.63539 | 0.000262 | 0.007219 | 0.581479 | Gdpd5   |
| 6936  | -1.08069 | 13.18294 | -3.75636 | 0.001675 | 0.015024 | -1.1887  | Ppm1b   |
| 33063 | -1.08088 | 11.2796  | -3.50331 | 0.002872 | 0.01976  | -1.70045 | Sf3b3   |
| 10965 | -1.08092 | 12.02458 | -3.5863  | 0.002407 | 0.017981 | -1.53289 | Abhd11  |
| 32747 | -1.08099 | 12.81246 | -3.61069 | 0.002285 | 0.017485 | -1.48358 | Polr2i  |
| 10348 | -1.081   | 9.645985 | -4.23656 | 0.000605 | 0.010014 | -0.21713 | Gtpbp2  |
| 13938 | -1.08103 | 15.44619 | -4.53501 | 0.000323 | 0.007678 | 0.381611 | Etfa    |
| 36393 | -1.08124 | 12.95862 | -3.77641 | 0.001605 | 0.014738 | -1.14808 | Selk    |
| 42420 | -1.08133 | 9.368864 | -3.5919  | 0.002378 | 0.01784  | -1.52157 | Rev3l   |
| 49574 | -1.0815  | 11.51049 | -3.327   | 0.004179 | 0.024066 | -2.05505 | Sec61a1 |
| 40342 | -1.08151 | 8.661759 | -3.94611 | 0.001119 | 0.012593 | -0.80424 | Kin     |
| 30528 | -1.08152 | 13.4739  | -3.85199 | 0.001367 | 0.013754 | -0.99494 | Rnf128  |
| 18622 | -1.08152 | 11.4114  | -3.07748 | 0.007088 | 0.032663 | -2.55164 | Rasa3   |
| 62171 | -1.08171 | 11.22806 | -3.38974 | 0.003658 | 0.022423 | -1.92913 | Cetn2   |
| 37517 | -1.08176 | 9.984817 | -3.62517 | 0.002216 | 0.017235 | -1.45429 | Mthfd1  |
| 38669 | -1.08183 | 9.744654 | -4.40603 | 0.000423 | 0.008651 | 0.123604 | Dhx33   |
| 29951 | -1.08189 | 10.723   | -3.27562 | 0.004661 | 0.02559  | -2.15789 | Sbds    |

|       |          |          |          |          |          |          |          |
|-------|----------|----------|----------|----------|----------|----------|----------|
| 14442 | -1.08194 | 13.77559 | -4.94939 | 0.000137 | 0.005859 | 1.200512 | Fam195a  |
| 11223 | -1.08222 | 12.6548  | -3.71336 | 0.001836 | 0.015584 | -1.2758  | Timm44   |
| 56059 | -1.08223 | 10.72836 | -3.52358 | 0.002751 | 0.019345 | -1.65957 | Rbm10    |
| 52532 | -1.08223 | 8.216886 | -3.97384 | 0.001055 | 0.012341 | -0.74808 | Adamts14 |
| 55871 | -1.08254 | 12.85245 | -3.37499 | 0.003774 | 0.022806 | -1.95876 | Hp1bp3   |
| 42669 | -1.08267 | 10.48757 | -4.20277 | 0.00065  | 0.010138 | -0.28527 | Glrx2    |
| 51637 | -1.08305 | 11.44371 | -4.14725 | 0.00073  | 0.010607 | -0.39733 | Opa3     |
| 31415 | -1.08312 | 12.12018 | -3.5932  | 0.002372 | 0.017815 | -1.51894 | Atp11a   |
| 19744 | -1.08316 | 9.279676 | -4.02248 | 0.000951 | 0.011806 | -0.64962 | Cyb5rl   |
| 44680 | -1.08324 | 12.47778 | -3.64676 | 0.002116 | 0.016831 | -1.41062 | Bri3bp   |
| 4379  | -1.08331 | 9.907208 | -3.34945 | 0.003985 | 0.023383 | -2.01002 | Usp3     |
| 60943 | -1.08331 | 14.75989 | -5.21382 | 8.02E-05 | 0.004967 | 1.71337  | Uqcrfs1  |
| 10003 | -1.08347 | 12.35651 | -3.16247 | 0.005924 | 0.029382 | -2.38335 | Sirt3    |
| 18557 | -1.08391 | 9.168037 | -3.85544 | 0.001357 | 0.013729 | -0.98793 | Nrbf2    |
| 59881 | -1.08391 | 10.73782 | -4.38122 | 0.000446 | 0.008891 | 0.073837 | Abcb10   |
| 56585 | -1.08404 | 12.32622 | -3.96387 | 0.001077 | 0.012408 | -0.76827 | Zfand5   |
| 3420  | -1.08414 | 11.59486 | -2.86209 | 0.011134 | 0.043339 | -2.97296 | Cxcr7    |
| 57825 | -1.08439 | 8.5514   | -3.55622 | 0.002566 | 0.018615 | -1.59366 | Nipal3   |
| 4887  | -1.08441 | 13.23893 | -3.85074 | 0.00137  | 0.013778 | -0.99746 | Casq2    |
| 12729 | -1.08451 | 15.01243 | -4.21105 | 0.000638 | 0.010115 | -0.26858 | Gm11810  |
| 1094  | -1.08461 | 10.95065 | -2.98889 | 0.00854  | 0.036489 | -2.72591 | Smarce1  |
| 61115 | -1.08462 | 9.954361 | -3.36742 | 0.003835 | 0.022914 | -1.97396 | Fbxo25   |
| 53905 | -1.08493 | 12.06379 | -3.49099 | 0.002949 | 0.020009 | -1.72532 | Tarbp2   |
| 61786 | -1.08493 | 11.47759 | -3.44127 | 0.003278 | 0.021098 | -1.82549 | Creld2   |
| 23227 | -1.08496 | 13.01396 | -3.53695 | 0.002674 | 0.018977 | -1.63257 | Ube2l3   |
| 47153 | -1.08499 | 10.45018 | -3.96459 | 0.001076 | 0.012402 | -0.76682 | Btf3l4   |

|       |          |          |          |          |          |          |          |
|-------|----------|----------|----------|----------|----------|----------|----------|
| 9737  | -1.08499 | 10.78696 | -4.50299 | 0.000346 | 0.007904 | 0.317671 | Rfk      |
| 39193 | -1.085   | 12.75192 | -4.68445 | 0.000237 | 0.006925 | 0.678847 | Mapkapk5 |
| 26996 | -1.08504 | 8.4424   | -4.20684 | 0.000644 | 0.010117 | -0.27707 | Lrrc57   |
| 12885 | -1.08532 | 14.30697 | -4.1481  | 0.000729 | 0.010606 | -0.39562 | Slc4a3   |
| 34673 | -1.08541 | 8.575334 | -3.82131 | 0.001459 | 0.014191 | -1.05709 | Tcta     |
| 28562 | -1.0857  | 11.73122 | -3.85974 | 0.001344 | 0.013644 | -0.97922 | Man2c1   |
| 696   | -1.08579 | 11.20867 | -3.81976 | 0.001464 | 0.014211 | -1.06023 | Grb2     |
| 53250 | -1.0858  | 12.42615 | -4.0081  | 0.000981 | 0.011995 | -0.67872 | Coq10a   |
| 38252 | -1.08585 | 13.13739 | -3.77098 | 0.001624 | 0.014835 | -1.15907 | Sub1     |
| 57768 | -1.08607 | 14.93942 | -4.27288 | 0.00056  | 0.009646 | -0.14396 | Cox7a2   |
| 14853 | -1.08625 | 9.996734 | -3.4372  | 0.003306 | 0.02121  | -1.83369 | Cbfa2t2  |
| 15150 | -1.08638 | 10.67165 | -3.72512 | 0.001791 | 0.015421 | -1.25196 | Ccdc75   |
| 4670  | -1.08639 | 10.76149 | -3.1921  | 0.005564 | 0.028305 | -2.32445 | Zfp322a  |
| 39443 | -1.08653 | 11.35473 | -3.88955 | 0.001262 | 0.013239 | -0.91883 | Mrps15   |
| 21385 | -1.0866  | 11.69496 | -3.38095 | 0.003727 | 0.022644 | -1.94679 | Fcfl     |
| 60343 | -1.08664 | 13.7523  | -3.02599 | 0.007899 | 0.034757 | -2.65308 | Vti1b    |
| 370   | -1.08677 | 9.954997 | -3.90337 | 0.001225 | 0.013165 | -0.89082 | Spen     |
| 22906 | -1.08697 | 10.93195 | -3.26506 | 0.004767 | 0.025862 | -2.17898 | Ost4     |
| 22468 | -1.08701 | 9.433444 | -3.00259 | 0.008298 | 0.03587  | -2.69905 | Cd200    |
| 60598 | -1.08705 | 11.18615 | -3.37023 | 0.003813 | 0.022879 | -1.96831 | Pdpl1    |
| 37746 | -1.0871  | 10.80352 | -3.55971 | 0.002547 | 0.018514 | -1.5866  | Chuk     |
| 62294 | -1.08724 | 9.233032 | -3.36786 | 0.003832 | 0.022899 | -1.97308 | Atg3     |
| 45160 | -1.08727 | 10.17307 | -3.25603 | 0.004859 | 0.02615  | -2.19701 | Dhx40    |
| 2390  | -1.08731 | 9.845899 | -3.18618 | 0.005634 | 0.028488 | -2.33624 | Bach1    |
| 26145 | -1.08732 | 10.66783 | -3.96208 | 0.001082 | 0.012434 | -0.77189 | Fry      |
| 37507 | -1.0875  | 11.35546 | -4.22096 | 0.000625 | 0.0101   | -0.24859 | Msl3     |

|       |          |          |          |          |          |          |          |
|-------|----------|----------|----------|----------|----------|----------|----------|
| 15399 | -1.08763 | 8.781168 | -3.63862 | 0.002153 | 0.016977 | -1.42707 | Dock5    |
| 46112 | -1.08769 | 9.396086 | -3.6948  | 0.00191  | 0.015897 | -1.31338 | Ctsc     |
| 50037 | -1.08823 | 10.32248 | -4.40609 | 0.000423 | 0.008651 | 0.123723 | Rpap1    |
| 6289  | -1.08824 | 11.95201 | -3.30099 | 0.004417 | 0.024838 | -2.10713 | Bptf     |
| 43819 | -1.08829 | 9.842462 | -4.49985 | 0.000348 | 0.007904 | 0.311408 | Lymr4    |
| 60890 | -1.08836 | 7.128596 | -3.42645 | 0.003383 | 0.021485 | -1.85531 | Gm4544   |
| 19256 | -1.08869 | 10.3255  | -3.5144  | 0.002805 | 0.019583 | -1.67808 | Gm10767  |
| 44838 | -1.08884 | 10.60798 | -3.63534 | 0.002168 | 0.017052 | -1.43371 | Zc3h14   |
| 46176 | -1.08887 | 12.61972 | -3.62798 | 0.002202 | 0.017163 | -1.44861 | Nutf2    |
| 40811 | -1.08902 | 10.21362 | -3.80029 | 0.001526 | 0.014459 | -1.09969 | Mterfd2  |
| 4990  | -1.08921 | 8.221118 | -4.50056 | 0.000347 | 0.007904 | 0.312829 | Slc19a1  |
| 33279 | -1.0897  | 9.67047  | -3.81894 | 0.001466 | 0.014216 | -1.06191 | Fam73a   |
| 62555 | -1.08993 | 15.52932 | -3.70311 | 0.001877 | 0.015731 | -1.29654 | Oxct1    |
| 58113 | -1.09013 | 9.100058 | -3.86143 | 0.00134  | 0.013623 | -0.9758  | Ube3c    |
| 2945  | -1.09014 | 9.864141 | -3.64599 | 0.002119 | 0.016831 | -1.41217 | Eif2c4   |
| 60642 | -1.09015 | 13.65899 | -3.20604 | 0.005402 | 0.027789 | -2.2967  | Taok1    |
| 56420 | -1.09071 | 10.44711 | -3.51358 | 0.00281  | 0.019589 | -1.67974 | Atp6ap1  |
| 35874 | -1.09071 | 8.396786 | -4.64954 | 0.000255 | 0.007124 | 0.609587 | Klhl7    |
| 11094 | -1.09071 | 11.25214 | -3.60872 | 0.002295 | 0.017516 | -1.48756 | Cry2     |
| 8978  | -1.09092 | 12.41561 | -4.54233 | 0.000318 | 0.007663 | 0.396211 | Rbm24    |
| 18384 | -1.09096 | 11.00393 | -4.05469 | 0.000889 | 0.01149  | -0.58445 | Plk1s1   |
| 51680 | -1.09112 | 12.09545 | -3.86201 | 0.001338 | 0.013616 | -0.97462 | Hnrnpm   |
| 21340 | -1.09137 | 8.898192 | -3.71419 | 0.001833 | 0.015584 | -1.2741  | Tmem185b |
| 33444 | -1.09144 | 9.674547 | -3.77402 | 0.001613 | 0.014782 | -1.15291 | Pias2    |
| 21123 | -1.09153 | 8.587118 | -4.2455  | 0.000594 | 0.00994  | -0.19913 | Ercc8    |
| 42686 | -1.09154 | 11.28931 | -3.62314 | 0.002225 | 0.017254 | -1.4584  | G3bp1    |

|       |          |          |          |          |          |          |         |
|-------|----------|----------|----------|----------|----------|----------|---------|
| 40659 | -1.09157 | 13.80164 | -4.01422 | 0.000968 | 0.011934 | -0.66633 | Perp    |
| 42167 | -1.09165 | 10.68351 | -3.18369 | 0.005664 | 0.028582 | -2.34118 | Ggh     |
| 30300 | -1.09198 | 7.845006 | -5.57854 | 3.88E-05 | 0.003938 | 2.406167 | Galm    |
| 3505  | -1.09211 | 9.84467  | -3.26698 | 0.004747 | 0.025827 | -2.17515 | Caml    |
| 28461 | -1.09224 | 10.37154 | -3.60617 | 0.002307 | 0.017546 | -1.49272 | Efr3a   |
| 27759 | -1.09227 | 14.4164  | -4.3184  | 0.000509 | 0.009336 | -0.05237 | Epas1   |
| 36410 | -1.09243 | 7.577445 | -3.54593 | 0.002623 | 0.018788 | -1.61445 | Dll1    |
| 24635 | -1.09246 | 9.573962 | -2.76679 | 0.013573 | 0.049086 | -3.15651 | P4ha1   |
| 44985 | -1.09257 | 9.621454 | -3.87161 | 0.001311 | 0.013481 | -0.95517 | Ptpn2   |
| 52918 | -1.09259 | 8.520603 | -4.06045 | 0.000878 | 0.011455 | -0.57278 | Prdm16  |
| 60321 | -1.09276 | 9.496838 | -3.96453 | 0.001076 | 0.012402 | -0.76694 | Nbeal1  |
| 27917 | -1.09296 | 10.12793 | -4.08315 | 0.000837 | 0.011255 | -0.52688 | Phf14   |
| 62714 | -1.09299 | 9.255477 | -3.86898 | 0.001318 | 0.0135   | -0.96051 | Ap3m1   |
| 39237 | -1.09321 | 10.54924 | -7.62893 | 9.05E-07 | 0.001159 | 5.933003 | Ppp1r3b |
| 19566 | -1.09323 | 11.11516 | -3.76573 | 0.001642 | 0.014895 | -1.16972 | Bcs1l   |
| 28687 | -1.09334 | 9.853085 | -3.6337  | 0.002176 | 0.017075 | -1.43702 | Pdcd2   |
| 25166 | -1.09354 | 9.163644 | -3.89597 | 0.001245 | 0.013205 | -0.90581 | Naaa    |
| 41898 | -1.09409 | 8.622392 | -4.08463 | 0.000834 | 0.011248 | -0.52387 | Nicn1   |
| 55965 | -1.09418 | 9.754647 | -3.40773 | 0.00352  | 0.021892 | -1.89297 | Fah     |
| 33447 | -1.09422 | 9.118516 | -3.68912 | 0.001933 | 0.016018 | -1.32488 | Nudt21  |
| 37199 | -1.09427 | 9.855604 | -3.87567 | 0.0013   | 0.013415 | -0.94696 | Plcl2   |
| 8714  | -1.09433 | 9.931524 | -3.89368 | 0.001251 | 0.013205 | -0.91046 | Rad17   |
| 57206 | -1.09446 | 9.072019 | -3.70849 | 0.001855 | 0.01565  | -1.28566 | Vps37a  |
| 58107 | -1.09458 | 14.50421 | -4.16667 | 0.000701 | 0.010424 | -0.35811 | Psmb6   |
| 49936 | -1.09461 | 12.73114 | -3.25873 | 0.004831 | 0.026053 | -2.19163 | Polr2g  |
| 32650 | -1.09464 | 10.94194 | -3.81954 | 0.001464 | 0.014211 | -1.06068 | Fgfl    |

|       |          |          |          |          |          |          |               |
|-------|----------|----------|----------|----------|----------|----------|---------------|
| 28568 | -1.09483 | 12.32647 | -4.2079  | 0.000643 | 0.010117 | -0.27492 | Fbxw5         |
| 14120 | -1.09516 | 12.50344 | -3.91623 | 0.001192 | 0.013001 | -0.86477 | Arl6ip4       |
| 24583 | -1.09524 | 9.899674 | -3.59792 | 0.002348 | 0.017719 | -1.5094  | Plcb3         |
| 62855 | -1.09524 | 12.91037 | -4.57829 | 0.000295 | 0.007466 | 0.467888 | Psap          |
| 35921 | -1.09536 | 10.30666 | -3.90903 | 0.001211 | 0.013091 | -0.87935 | Mvk           |
| 17423 | -1.09582 | 10.95621 | -4.06083 | 0.000877 | 0.011455 | -0.57202 | Wdr45         |
| 12544 | -1.09591 | 9.938805 | -3.42523 | 0.003392 | 0.021507 | -1.85777 | Fam110a       |
| 53740 | -1.09602 | 11.28432 | -3.89774 | 0.00124  | 0.013202 | -0.90224 | Bicd2         |
| 39897 | -1.09608 | 10.30317 | -3.85776 | 0.00135  | 0.013686 | -0.98323 | Dcun1d5       |
| 19732 | -1.09609 | 8.984931 | -3.34122 | 0.004055 | 0.023611 | -2.02654 | Acpl2         |
| 46142 | -1.0961  | 9.47496  | -3.73951 | 0.001737 | 0.015235 | -1.22283 | Dgka          |
| 32370 | -1.09632 | 11.24501 | -3.71884 | 0.001815 | 0.015538 | -1.26469 | Tbkbpl        |
| 49531 | -1.09638 | 8.731441 | -3.50682 | 0.002851 | 0.019722 | -1.69337 | Spon1         |
| 29492 | -1.09674 | 11.28689 | -3.21918 | 0.005254 | 0.027398 | -2.27053 | Arhgef25      |
| 24094 | -1.09682 | 9.30205  | -3.46931 | 0.003088 | 0.020516 | -1.76901 | Polb          |
| 45642 | -1.09686 | 11.88389 | -4.41052 | 0.000419 | 0.008624 | 0.132593 | Polr2j        |
| 11799 | -1.09698 | 8.283904 | -4.60235 | 0.000281 | 0.007328 | 0.515793 | Pts           |
| 7294  | -1.09705 | 13.02084 | -3.47946 | 0.003022 | 0.020329 | -1.74855 | Ppp1cb        |
| 33322 | -1.09722 | 11.28691 | -3.3659  | 0.003848 | 0.022932 | -1.97702 | Slc15a4       |
| 46816 | -1.09733 | 8.848368 | -3.9142  | 0.001197 | 0.013013 | -0.86888 | Clec2d        |
| 12399 | -1.09742 | 10.53675 | -3.59968 | 0.002339 | 0.017673 | -1.50584 | Appbp2        |
| 44295 | -1.09757 | 13.88264 | -4.50179 | 0.000347 | 0.007904 | 0.31528  | Ube2b         |
| 6584  | -1.09767 | 9.279088 | -3.40862 | 0.003514 | 0.021892 | -1.89117 | Dlg3          |
| 47951 | -1.09775 | 8.520205 | -4.43018 | 0.000403 | 0.00847  | 0.172011 | Pds5b         |
| 59393 | -1.09804 | 13.16224 | -3.96248 | 0.001081 | 0.01243  | -0.7711  | Ppp1cc        |
| 49003 | -1.09814 | 8.829236 | -3.07026 | 0.007197 | 0.032962 | -2.5659  | F830016B08Rik |

|       |          |          |          |          |          |          |         |
|-------|----------|----------|----------|----------|----------|----------|---------|
| 25848 | -1.09836 | 10.38437 | -3.71586 | 0.001826 | 0.015558 | -1.27073 | Dnajc9  |
| 57626 | -1.09849 | 14.86305 | -4.96264 | 0.000134 | 0.005828 | 1.226414 | Gm5786  |
| 49712 | -1.09869 | 12.43485 | -4.05373 | 0.00089  | 0.01149  | -0.58639 | Rbpms2  |
| 27974 | -1.09908 | 8.580912 | -3.9159  | 0.001193 | 0.013003 | -0.86544 | Rwdd4a  |
| 60332 | -1.09913 | 8.353552 | -4.59756 | 0.000284 | 0.007333 | 0.506261 | Ube2w   |
| 34563 | -1.09917 | 13.47451 | -3.12318 | 0.006436 | 0.030866 | -2.46128 | Hspb8   |
| 49552 | -1.09934 | 13.47509 | -5.05764 | 0.00011  | 0.005572 | 1.411468 | Ckm     |
| 8884  | -1.09936 | 10.99117 | -4.41106 | 0.000419 | 0.008622 | 0.133692 | Mtr     |
| 19327 | -1.09977 | 8.50599  | -4.41793 | 0.000413 | 0.008563 | 0.147451 | Aldh1l1 |
| 15467 | -1.09978 | 11.90573 | -3.36168 | 0.003882 | 0.023027 | -1.98548 | Mesdc2  |
| 44020 | -1.1     | 13.78997 | -5.23246 | 7.73E-05 | 0.004951 | 1.749204 | Macrodl |
| 51920 | -1.10006 | 10.3978  | -3.63221 | 0.002183 | 0.017094 | -1.44004 | Fam173b |
| 51492 | -1.10024 | 10.23146 | -3.16871 | 0.005846 | 0.029198 | -2.37095 | Nr1d2   |
| 31947 | -1.10031 | 14.70976 | -3.02076 | 0.007987 | 0.035026 | -2.66337 | Sh3bgr  |
| 42662 | -1.10038 | 10.87674 | -4.05256 | 0.000893 | 0.01149  | -0.58874 | Krba1   |
| 44725 | -1.1005  | 12.19916 | -3.56408 | 0.002524 | 0.018434 | -1.57779 | Rom1    |
| 24664 | -1.10052 | 10.17478 | -3.83157 | 0.001427 | 0.014006 | -1.0363  | Golph3  |
| 17288 | -1.10059 | 9.384957 | -3.75619 | 0.001676 | 0.015024 | -1.18904 | Sox7    |
| 61735 | -1.1006  | 11.89724 | -3.42619 | 0.003385 | 0.021485 | -1.85583 | Arhgef6 |
| 26077 | -1.10061 | 7.986596 | -4.45367 | 0.000383 | 0.008277 | 0.219036 | Rg9mtd1 |
| 39846 | -1.10062 | 11.02789 | -3.96379 | 0.001078 | 0.012408 | -0.76844 | Ccdc90a |
| 57559 | -1.1007  | 10.52345 | -3.60071 | 0.002334 | 0.017655 | -1.50375 | Snrpf   |
| 17964 | -1.10087 | 8.696505 | -6.6209  | 5.35E-06 | 0.002346 | 4.280202 | Gabrr2  |
| 42387 | -1.10109 | 10.56524 | -3.74007 | 0.001734 | 0.015225 | -1.22169 | Lrba    |
| 28758 | -1.10122 | 9.923812 | -3.921   | 0.00118  | 0.012908 | -0.8551  | Cars2   |
| 54650 | -1.10151 | 10.06792 | -3.5821  | 0.002428 | 0.018098 | -1.54137 | Abhd14a |

|       |          |          |          |          |          |          |            |
|-------|----------|----------|----------|----------|----------|----------|------------|
| 13078 | -1.10155 | 10.24121 | -3.37564 | 0.003769 | 0.022795 | -1.95746 | Rai1       |
| 59504 | -1.10182 | 10.88506 | -3.62774 | 0.002203 | 0.017165 | -1.44909 | Diablo     |
| 61416 | -1.10184 | 10.54479 | -3.93082 | 0.001156 | 0.012818 | -0.83522 | Mrrf       |
| 25175 | -1.10193 | 10.77923 | -3.48982 | 0.002956 | 0.020021 | -1.72767 | Zc3h18     |
| 52496 | -1.10203 | 10.73101 | -2.90843 | 0.010108 | 0.040629 | -2.88303 | Zfp579     |
| 61292 | -1.10203 | 10.76607 | -3.32871 | 0.004164 | 0.024006 | -2.05162 | Clk4       |
| 4345  | -1.10209 | 12.04162 | -4.1387  | 0.000744 | 0.010683 | -0.4146  | AV026068   |
| 2686  | -1.1021  | 10.80689 | -4.03361 | 0.000929 | 0.011722 | -0.62709 | Srpk3      |
| 32365 | -1.10225 | 10.73224 | -4.11842 | 0.000776 | 0.010884 | -0.45558 | Med1       |
| 52203 | -1.10312 | 14.64257 | -4.94125 | 0.00014  | 0.005859 | 1.184603 | Mrpl14     |
| 14331 | -1.10318 | 13.02757 | -3.73225 | 0.001764 | 0.015332 | -1.23753 | Ube2j2     |
| 16259 | -1.10327 | 9.587164 | -4.0518  | 0.000894 | 0.011495 | -0.59028 | Usp21      |
| 14980 | -1.1034  | 10.20752 | -3.82467 | 0.001449 | 0.014138 | -1.0503  | Cmc1       |
| 17483 | -1.10369 | 13.19879 | -3.66255 | 0.002046 | 0.016528 | -1.37865 | Mrp63      |
| 32389 | -1.10374 | 12.03953 | -3.88897 | 0.001263 | 0.013239 | -0.92001 | Nhp211     |
| 18203 | -1.10403 | 7.698765 | -3.59701 | 0.002353 | 0.017724 | -1.51124 | Klra8      |
| 17329 | -1.10404 | 11.45232 | -3.52615 | 0.002736 | 0.01928  | -1.65437 | Poldip2    |
| 38470 | -1.10405 | 9.039551 | -4.1167  | 0.000779 | 0.010901 | -0.45906 | Wnt5a      |
| 44885 | -1.10419 | 11.03032 | -3.35608 | 0.003929 | 0.023171 | -1.99672 | Psmc8      |
| 51324 | -1.10423 | 10.38096 | -3.44309 | 0.003265 | 0.021078 | -1.82182 | Tmem206    |
| 13900 | -1.10426 | 11.85657 | -4.09943 | 0.000808 | 0.011101 | -0.49397 | St6galnac6 |
| 8023  | -1.10439 | 13.13861 | -3.95942 | 0.001088 | 0.012478 | -0.77729 | Mrps25     |
| 37261 | -1.10443 | 9.098415 | -4.17392 | 0.00069  | 0.010371 | -0.34349 | Med26      |
| 5299  | -1.10446 | 14.55385 | -4.43164 | 0.000401 | 0.008463 | 0.174935 | Mrpl51     |
| 3904  | -1.10459 | 11.66566 | -3.38113 | 0.003725 | 0.022643 | -1.94643 | Cd47       |
| 15597 | -1.10491 | 12.71613 | -3.50323 | 0.002873 | 0.01976  | -1.70062 | Fam96b     |



|       |          |          |          |          |          |          |         |
|-------|----------|----------|----------|----------|----------|----------|---------|
| 5735  | -1.10494 | 10.92821 | -3.61407 | 0.002269 | 0.017417 | -1.47674 | Pdcd2l  |
| 33655 | -1.10507 | 11.90827 | -3.70061 | 0.001887 | 0.015769 | -1.30161 | Smc1a   |
| 25964 | -1.10532 | 9.777168 | -3.61216 | 0.002278 | 0.017455 | -1.4806  | Tomm70a |
| 48878 | -1.10537 | 11.15703 | -4.48654 | 0.000358 | 0.008021 | 0.284791 | Brd4    |
| 41542 | -1.10542 | 13.04401 | -3.8866  | 0.00127  | 0.013275 | -0.9248  | Sec24c  |
| 46235 | -1.10557 | 10.51161 | -3.2911  | 0.00451  | 0.025161 | -2.12692 | Unc13b  |
| 48940 | -1.10573 | 10.88517 | -4.11955 | 0.000774 | 0.010871 | -0.4533  | Aph1a   |
| 29824 | -1.10585 | 9.346306 | -3.67188 | 0.002006 | 0.016353 | -1.35977 | Coq10b  |
| 7835  | -1.10621 | 12.90861 | -4.56834 | 0.000302 | 0.007502 | 0.448077 | Ldb3    |
| 36722 | -1.10622 | 9.98242  | -3.41374 | 0.003476 | 0.021767 | -1.88089 | Klhl17  |
| 43069 | -1.1063  | 10.17817 | -4.1407  | 0.000741 | 0.010661 | -0.41055 | Snrpc   |
| 9750  | -1.10631 | 12.57579 | -3.39976 | 0.00358  | 0.02212  | -1.90899 | Tmed10  |
| 52084 | -1.10638 | 12.10294 | -3.51522 | 0.0028   | 0.019574 | -1.67643 | Yap1    |
| 28840 | -1.10663 | 12.67083 | -3.44238 | 0.00327  | 0.021098 | -1.82326 | H2afz   |
| 44581 | -1.10675 | 10.5481  | -3.8497  | 0.001373 | 0.013796 | -0.99957 | Psmg2   |
| 28210 | -1.10687 | 11.73049 | -3.72175 | 0.001803 | 0.015483 | -1.25881 | Acbd4   |
| 40345 | -1.10725 | 10.21123 | -3.6327  | 0.00218  | 0.017088 | -1.43906 | Cnot2   |
| 11629 | -1.10728 | 8.740244 | -3.41974 | 0.003431 | 0.021638 | -1.86881 | Wdr41   |
| 32175 | -1.10731 | 10.5099  | -4.29255 | 0.000537 | 0.00953  | -0.10438 | Rai12   |
| 1357  | -1.10738 | 11.46478 | -3.82808 | 0.001438 | 0.01408  | -1.04339 | Dpf2    |
| 36547 | -1.10746 | 8.972382 | -3.47141 | 0.003074 | 0.020486 | -1.76478 | Bivm    |
| 37195 | -1.10748 | 9.726483 | -3.47117 | 0.003076 | 0.020486 | -1.76525 | Sgce    |
| 35470 | -1.10775 | 11.42115 | -3.78404 | 0.001579 | 0.014646 | -1.13261 | Klhl22  |
| 30989 | -1.10789 | 11.56444 | -3.94321 | 0.001126 | 0.012635 | -0.81013 | Dnajc30 |
| 28079 | -1.10792 | 11.59613 | -3.43941 | 0.003291 | 0.021151 | -1.82924 | Ilkap   |
| 36193 | -1.10817 | 7.76484  | -4.09015 | 0.000824 | 0.011193 | -0.51273 | Ccbe1   |

|       |          |          |          |          |          |          |          |
|-------|----------|----------|----------|----------|----------|----------|----------|
| 53812 | -1.10818 | 10.57964 | -4.02607 | 0.000944 | 0.011763 | -0.64234 | Thap11   |
| 21946 | -1.10823 | 10.79977 | -3.65087 | 0.002097 | 0.016742 | -1.4023  | Tmem42   |
| 58082 | -1.10826 | 15.51874 | -5.72282 | 2.92E-05 | 0.003693 | 2.675191 | Ndufb4   |
| 58126 | -1.10839 | 9.605551 | -3.66654 | 0.002029 | 0.016446 | -1.37059 | Man2a2   |
| 19724 | -1.1086  | 10.07601 | -3.84649 | 0.001383 | 0.013852 | -1.00608 | Pex6     |
| 40747 | -1.10864 | 9.235203 | -3.90317 | 0.001226 | 0.013165 | -0.89123 | Homer2   |
| 4491  | -1.10869 | 12.26017 | -3.67343 | 0.001999 | 0.016329 | -1.35663 | Pde4a    |
| 28893 | -1.10895 | 11.63655 | -3.60528 | 0.002311 | 0.017572 | -1.49452 | Clasrp   |
| 4041  | -1.10927 | 13.9101  | -4.20775 | 0.000643 | 0.010117 | -0.27523 | Rps4x    |
| 33041 | -1.10932 | 10.52837 | -3.87078 | 0.001313 | 0.013488 | -0.95686 | Gkap1    |
| 60259 | -1.1094  | 10.91459 | -3.23876 | 0.00504  | 0.026724 | -2.23149 | Cnot8    |
| 4455  | -1.10959 | 10.75448 | -4.85974 | 0.000165 | 0.00607  | 1.024806 | Adcy6    |
| 23537 | -1.10973 | 10.70629 | -3.74952 | 0.0017   | 0.01507  | -1.20256 | Cul4a    |
| 41742 | -1.10984 | 8.975744 | -4.21385 | 0.000635 | 0.0101   | -0.26291 | Slc2a12  |
| 17267 | -1.11002 | 9.150104 | -4.18029 | 0.000681 | 0.010327 | -0.33062 | Fbxo34   |
| 52672 | -1.11013 | 12.86361 | -4.04455 | 0.000908 | 0.011594 | -0.60496 | Mrpl43   |
| 13299 | -1.11021 | 12.02151 | -4.32001 | 0.000507 | 0.009336 | -0.04913 | Spsb3    |
| 41638 | -1.11028 | 8.573468 | -3.77824 | 0.001599 | 0.014708 | -1.14437 | Fam185a  |
| 21423 | -1.11056 | 13.41174 | -3.45314 | 0.003196 | 0.020827 | -1.80158 | Tsen34   |
| 22350 | -1.11065 | 8.731474 | -4.16834 | 0.000699 | 0.010416 | -0.35474 | Polr3d   |
| 11897 | -1.1108  | 9.152842 | -3.46577 | 0.003111 | 0.020589 | -1.77614 | Klhl8    |
| 43473 | -1.11095 | 10.10198 | -4.34108 | 0.000485 | 0.009134 | -0.00679 | Setd2    |
| 40833 | -1.11096 | 11.13121 | -3.40785 | 0.003519 | 0.021892 | -1.89273 | Lsm2     |
| 56186 | -1.11105 | 12.10511 | -2.87702 | 0.010793 | 0.042492 | -2.94405 | Btg1     |
| 58985 | -1.1112  | 10.93946 | -3.68246 | 0.001961 | 0.01615  | -1.33835 | Slc25a46 |
| 58445 | -1.11121 | 10.75765 | -3.61991 | 0.00224  | 0.017286 | -1.46492 | Klhl12   |

|       |          |          |          |          |          |          |          |
|-------|----------|----------|----------|----------|----------|----------|----------|
| 21275 | -1.11131 | 8.394283 | -3.82084 | 0.00146  | 0.014191 | -1.05806 | Ggcx     |
| 3664  | -1.11114 | 10.11753 | -3.54846 | 0.002609 | 0.018768 | -1.60934 | Chchd4   |
| 18770 | -1.11151 | 10.58134 | -4.66785 | 0.000245 | 0.007001 | 0.645919 | Tmem164  |
| 45184 | -1.11168 | 13.43939 | -3.97084 | 0.001062 | 0.012344 | -0.75415 | Lsmd1    |
| 11574 | -1.11245 | 8.905893 | -4.63878 | 0.00026  | 0.007218 | 0.588213 | Chchd5   |
| 23774 | -1.11253 | 11.19561 | -3.60676 | 0.002304 | 0.017541 | -1.49153 | Txnl4a   |
| 18179 | -1.11275 | 10.4485  | -3.64423 | 0.002127 | 0.016859 | -1.41572 | Fcgrt    |
| 33793 | -1.11276 | 10.74478 | -4.16916 | 0.000697 | 0.010411 | -0.3531  | Cpsf3    |
| 26015 | -1.11282 | 12.2502  | -3.90503 | 0.001221 | 0.013158 | -0.88746 | Bud31    |
| 28538 | -1.11293 | 11.57908 | -3.32019 | 0.00424  | 0.024286 | -2.06868 | Traf2    |
| 58144 | -1.11295 | 9.630192 | -3.78976 | 0.00156  | 0.014599 | -1.12104 | Aig1     |
| 28851 | -1.11303 | 8.092597 | -3.72659 | 0.001785 | 0.015397 | -1.249   | Rgs6     |
| 56343 | -1.11305 | 10.58179 | -3.94216 | 0.001128 | 0.012641 | -0.81224 | Ttc17    |
| 45578 | -1.11312 | 8.637041 | -4.35953 | 0.000467 | 0.009033 | 0.030289 | Sh3kbp1  |
| 33296 | -1.11349 | 14.2429  | -6.19126 | 1.19E-05 | 0.002786 | 3.527661 | Ndufa9   |
| 2219  | -1.11378 | 8.374326 | -3.84013 | 0.001402 | 0.01392  | -1.01897 | Fam82a1  |
| 45612 | -1.11379 | 15.24986 | -5.66216 | 3.29E-05 | 0.003769 | 2.562453 | Slc25a11 |
| 34681 | -1.1138  | 9.223411 | -3.88044 | 0.001286 | 0.013363 | -0.93729 | Ppp1r9a  |
| 9489  | -1.11392 | 12.0562  | -3.70107 | 0.001885 | 0.015769 | -1.30067 | Mrpl34   |
| 38472 | -1.114   | 8.361239 | -4.29967 | 0.000529 | 0.009465 | -0.09005 | Papolg   |
| 61173 | -1.11408 | 10.22041 | -4.12949 | 0.000758 | 0.010755 | -0.4332  | Tomm40l  |
| 39460 | -1.11411 | 9.373351 | -3.82212 | 0.001456 | 0.014177 | -1.05546 | Rcc1     |
| 45148 | -1.11429 | 11.5461  | -3.6939  | 0.001914 | 0.015915 | -1.31519 | Znfx1    |
| 14855 | -1.11433 | 11.63781 | -3.67188 | 0.002006 | 0.016353 | -1.35978 | Gstz1    |
| 34996 | -1.11455 | 10.82163 | -3.61952 | 0.002242 | 0.017286 | -1.46571 | Setx     |
| 5422  | -1.11475 | 10.32668 | -3.60805 | 0.002298 | 0.017522 | -1.48892 | Lmcd1    |

|       |          |          |          |          |          |          |         |
|-------|----------|----------|----------|----------|----------|----------|---------|
| 19687 | -1.11477 | 10.16469 | -4.41618 | 0.000415 | 0.008576 | 0.143948 | Cmtm8   |
| 43355 | -1.11497 | 13.07079 | -4.34624 | 0.00048  | 0.009113 | 0.003585 | Ict1    |
| 17665 | -1.11506 | 9.980084 | -3.72141 | 0.001805 | 0.015483 | -1.25949 | Lifr    |
| 25694 | -1.11509 | 11.09706 | -3.53722 | 0.002672 | 0.018977 | -1.63203 | Gatad1  |
| 60240 | -1.11529 | 12.09215 | -2.94176 | 0.009427 | 0.038863 | -2.8181  | Tspan13 |
| 12517 | -1.1153  | 11.87329 | -3.92542 | 0.001169 | 0.012871 | -0.84615 | Yifla   |
| 11548 | -1.11534 | 12.02294 | -3.87443 | 0.001303 | 0.013438 | -0.94947 | Asb8    |
| 17766 | -1.11538 | 8.907147 | -4.47456 | 0.000367 | 0.008089 | 0.260837 | Slco2b1 |
| 5639  | -1.11561 | 13.27376 | -3.99908 | 0.001    | 0.012047 | -0.69697 | Mrpl11  |
| 6155  | -1.11562 | 10.91102 | -3.65559 | 0.002076 | 0.016665 | -1.39273 | Scfd2   |
| 8605  | -1.11564 | 9.575998 | -3.49003 | 0.002955 | 0.020021 | -1.72725 | Ddr2    |
| 26027 | -1.1159  | 10.98532 | -3.92428 | 0.001172 | 0.012876 | -0.84846 | Isyna1  |
| 35999 | -1.11696 | 8.787867 | -3.87062 | 0.001314 | 0.013488 | -0.95719 | Fam92a  |
| 46904 | -1.11711 | 9.897544 | -3.89851 | 0.001238 | 0.013202 | -0.90068 | Pycard  |
| 8625  | -1.11713 | 13.17434 | -3.37093 | 0.003807 | 0.022874 | -1.96692 | Inpp11  |
| 25084 | -1.11718 | 8.664056 | -4.46299 | 0.000376 | 0.008192 | 0.237704 | Metap1d |
| 62428 | -1.11782 | 10.57495 | -3.73292 | 0.001761 | 0.015317 | -1.23618 | Akap9   |
| 22750 | -1.11785 | 12.46581 | -3.58016 | 0.002438 | 0.018131 | -1.54528 | Msi2    |
| 26452 | -1.11786 | 9.617    | -3.6812  | 0.001966 | 0.01616  | -1.34091 | Hspb11  |
| 57153 | -1.11808 | 10.89274 | -4.06655 | 0.000866 | 0.011414 | -0.56044 | Nsd1    |
| 45345 | -1.11823 | 9.639904 | -3.97251 | 0.001058 | 0.012341 | -0.75077 | Cpox    |
| 17631 | -1.11852 | 10.73113 | -3.55559 | 0.00257  | 0.018628 | -1.59493 | Tars    |
| 22280 | -1.11857 | 12.17939 | -3.25499 | 0.00487  | 0.026163 | -2.19909 | Lamp2   |
| 52501 | -1.11874 | 11.54776 | -3.22042 | 0.00524  | 0.027385 | -2.26807 | Entpd2  |
| 47148 | -1.11893 | 10.24026 | -4.40407 | 0.000425 | 0.008651 | 0.119661 | Fam126a |
| 37077 | -1.11903 | 11.42273 | -3.76498 | 0.001645 | 0.014895 | -1.17124 | Metap2  |

|       |          |          |          |          |          |          |          |
|-------|----------|----------|----------|----------|----------|----------|----------|
| 22433 | -1.11907 | 10.48162 | -3.49608 | 0.002917 | 0.019915 | -1.71504 | Jagn1    |
| 9485  | -1.11916 | 11.68292 | -3.85541 | 0.001357 | 0.013729 | -0.98799 | Ppa1     |
| 11495 | -1.11919 | 9.755139 | -3.85319 | 0.001363 | 0.013751 | -0.9925  | Mccc2    |
| 24698 | -1.11923 | 12.25819 | -3.60791 | 0.002299 | 0.017522 | -1.48919 | Spns1    |
| 1008  | -1.11924 | 7.467395 | -4.29022 | 0.00054  | 0.009554 | -0.10906 | Akap5    |
| 41089 | -1.11927 | 10.21347 | -3.36858 | 0.003826 | 0.022894 | -1.97163 | Kpna3    |
| 57946 | -1.11966 | 10.8322  | -4.2853  | 0.000546 | 0.009554 | -0.11896 | Ndufaf2  |
| 11763 | -1.11992 | 12.5292  | -4.12592 | 0.000764 | 0.010788 | -0.44043 | Trim63   |
| 34022 | -1.11995 | 10.2801  | -3.66572 | 0.002032 | 0.016461 | -1.37223 | Rsrc2    |
| 40935 | -1.12033 | 12.59293 | -3.555   | 0.002573 | 0.018637 | -1.59612 | Rnfl14   |
| 36012 | -1.12034 | 9.407359 | -4.99709 | 0.000125 | 0.005707 | 1.293638 | Qrs11    |
| 43686 | -1.12048 | 8.802446 | -4.17021 | 0.000696 | 0.010396 | -0.35098 | Crbn     |
| 31862 | -1.12051 | 8.904264 | -4.60464 | 0.00028  | 0.007327 | 0.520355 | AW209491 |
| 48644 | -1.1206  | 8.787438 | -3.89235 | 0.001254 | 0.013211 | -0.91314 | Immp21   |
| 51938 | -1.12063 | 9.046255 | -4.46479 | 0.000374 | 0.008178 | 0.241305 | Spryd4   |
| 26241 | -1.12076 | 12.3063  | -4.05353 | 0.000891 | 0.01149  | -0.58679 | Zbtb20   |
| 20478 | -1.12076 | 7.166392 | -4.54827 | 0.000314 | 0.007633 | 0.408071 | Pla2g4e  |
| 40233 | -1.12103 | 7.4805   | -3.4542  | 0.003189 | 0.020805 | -1.79945 | Hspa1a   |
| 59892 | -1.12112 | 8.29568  | -3.03195 | 0.007801 | 0.03451  | -2.64137 | Itga8    |
| 53232 | -1.12114 | 12.43153 | -3.55084 | 0.002596 | 0.018727 | -1.60453 | Hk2      |
| 38364 | -1.1214  | 11.17056 | -3.5605  | 0.002543 | 0.018513 | -1.58501 | Polr2f   |
| 15772 | -1.12149 | 11.0372  | -4.1011  | 0.000805 | 0.011093 | -0.49058 | Chmp7    |
| 19044 | -1.12155 | 9.441578 | -3.41704 | 0.003451 | 0.021703 | -1.87425 | Lrrc17   |
| 41531 | -1.12162 | 9.646679 | -3.9143  | 0.001197 | 0.013013 | -0.86867 | Nubpl    |
| 19549 | -1.12203 | 9.145756 | -3.87978 | 0.001288 | 0.013363 | -0.93862 | Akr1e1   |
| 43156 | -1.12204 | 9.650059 | -4.65258 | 0.000253 | 0.007106 | 0.61563  | Mov1011  |

|       |          |          |          |          |          |          |               |
|-------|----------|----------|----------|----------|----------|----------|---------------|
| 10597 | -1.12226 | 13.8311  | -4.13975 | 0.000742 | 0.010675 | -0.41248 | Pam16         |
| 62888 | -1.12235 | 11.88879 | -3.45357 | 0.003193 | 0.020825 | -1.80071 | Commd3        |
| 8407  | -1.12267 | 13.13229 | -4.23051 | 0.000613 | 0.010087 | -0.22933 | Dcaf11        |
| 565   | -1.12313 | 10.16065 | -3.68281 | 0.001959 | 0.016149 | -1.33765 | Cand2         |
| 9998  | -1.1237  | 10.14953 | -3.34073 | 0.004059 | 0.023623 | -2.0275  | Nck1          |
| 54288 | -1.1239  | 11.06784 | -4.16638 | 0.000701 | 0.010424 | -0.35871 | Sobp          |
| 14764 | -1.12393 | 11.19012 | -4.01662 | 0.000963 | 0.011923 | -0.66147 | Rfng          |
| 15517 | -1.12424 | 11.27121 | -3.7846  | 0.001578 | 0.014645 | -1.13148 | Ethel         |
| 39894 | -1.12439 | 11.12006 | -3.42032 | 0.003427 | 0.021619 | -1.86764 | Snrpb2        |
| 58949 | -1.12452 | 11.17072 | -3.76795 | 0.001634 | 0.014876 | -1.16522 | Sdhaf1        |
| 48523 | -1.12453 | 12.75168 | -4.36323 | 0.000463 | 0.008987 | 0.03772  | Rab12         |
| 875   | -1.12503 | 13.32055 | -4.18087 | 0.00068  | 0.010327 | -0.32946 | Ahsa1         |
| 48592 | -1.12505 | 12.23411 | -3.39864 | 0.003589 | 0.022148 | -1.91125 | Map4k4        |
| 42994 | -1.12506 | 12.07075 | -3.56767 | 0.002504 | 0.018361 | -1.57053 | Elavl1        |
| 49301 | -1.12519 | 11.55263 | -4.10123 | 0.000805 | 0.011093 | -0.49032 | Tsc22d4       |
| 40538 | -1.12521 | 13.73912 | -4.42351 | 0.000408 | 0.008543 | 0.158641 | Mrpl2         |
| 8822  | -1.12534 | 9.4844   | -3.46212 | 0.003136 | 0.020634 | -1.7835  | Dcakd         |
| 2975  | -1.12536 | 13.28365 | -3.61659 | 0.002256 | 0.017363 | -1.47164 | Urod          |
| 28708 | -1.12536 | 9.931783 | -4.05624 | 0.000886 | 0.01149  | -0.58131 | Dolpp1        |
| 50498 | -1.12537 | 10.70049 | -3.91018 | 0.001208 | 0.013079 | -0.87703 | Hic1          |
| 12404 | -1.12566 | 10.45168 | -3.24722 | 0.00495  | 0.026398 | -2.2146  | Crebzf        |
| 40477 | -1.12577 | 9.692065 | -4.82739 | 0.000176 | 0.006166 | 0.961194 | E130311K13Rik |
| 60186 | -1.12603 | 12.03854 | -2.77372 | 0.013379 | 0.048548 | -3.14322 | Rangrf        |
| 62203 | -1.12605 | 10.47816 | -4.97182 | 0.000131 | 0.005815 | 1.244331 | H2-Ke2        |
| 57969 | -1.12605 | 9.889935 | -3.894   | 0.00125  | 0.013205 | -0.90982 | Mlst8         |
| 49996 | -1.12608 | 10.28324 | -3.12704 | 0.006384 | 0.030681 | -2.45364 | Jam3          |

|       |          |          |          |          |          |          |               |
|-------|----------|----------|----------|----------|----------|----------|---------------|
| 12271 | -1.12608 | 12.14272 | -3.48262 | 0.003002 | 0.020256 | -1.74219 | Nono          |
| 21878 | -1.12624 | 12.90432 | -3.77591 | 0.001607 | 0.014738 | -1.14909 | Mrpl13        |
| 28876 | -1.12633 | 9.523342 | -4.13461 | 0.00075  | 0.010741 | -0.42287 | Tmem218       |
| 31078 | -1.12642 | 11.00906 | -3.94357 | 0.001125 | 0.012635 | -0.80939 | Dnlz          |
| 46760 | -1.12642 | 9.400962 | -4.49195 | 0.000354 | 0.007971 | 0.295611 | Ankrd50       |
| 44455 | -1.12647 | 16.26893 | -6.57635 | 5.80E-06 | 0.002346 | 4.203511 | Cs            |
| 44809 | -1.12654 | 9.818454 | -4.23624 | 0.000605 | 0.010014 | -0.21779 | Kdm4a         |
| 21511 | -1.12654 | 10.34499 | -4.19269 | 0.000664 | 0.010247 | -0.30561 | Tmem51        |
| 40101 | -1.12725 | 9.702779 | -3.93156 | 0.001154 | 0.012818 | -0.83372 | Nol11         |
| 31949 | -1.12775 | 13.86104 | -4.04576 | 0.000906 | 0.011576 | -0.60251 | Grin11a       |
| 55388 | -1.12779 | 12.3427  | -3.67381 | 0.001997 | 0.016322 | -1.35587 | Elof1         |
| 35780 | -1.1282  | 9.614975 | -4.27162 | 0.000562 | 0.009657 | -0.14651 | Slc31a1       |
| 41160 | -1.1282  | 9.701559 | -3.41641 | 0.003456 | 0.021712 | -1.87552 | Mettl16       |
| 50052 | -1.12826 | 10.65169 | -3.73362 | 0.001758 | 0.015306 | -1.23476 | D030056L22Rik |
| 55554 | -1.12877 | 8.589701 | -4.70667 | 0.000226 | 0.006827 | 0.722872 | Gm2695        |
| 20839 | -1.12884 | 10.04602 | -4.24806 | 0.00059  | 0.009909 | -0.19396 | Kcnd3         |
| 46500 | -1.12904 | 10.37839 | -3.61397 | 0.002269 | 0.017417 | -1.47695 | Osbpl3        |
| 28148 | -1.12924 | 9.348255 | -4.17869 | 0.000683 | 0.010338 | -0.33386 | Dnajc12       |
| 22518 | -1.12924 | 13.23731 | -4.98028 | 0.000129 | 0.00578  | 1.260846 | Cox6b1        |
| 47305 | -1.12949 | 14.9387  | -3.16269 | 0.005921 | 0.029382 | -2.38291 | Clu           |
| 15582 | -1.12952 | 12.57557 | -4.28053 | 0.000551 | 0.00958  | -0.12857 | Rab14         |
| 1124  | -1.12959 | 10.14805 | -3.52685 | 0.002732 | 0.019267 | -1.65296 | Zmym3         |
| 55393 | -1.12963 | 14.51041 | -4.60753 | 0.000278 | 0.007325 | 0.526088 | Gm7065        |
| 39639 | -1.12964 | 9.853893 | -3.95949 | 0.001087 | 0.012478 | -0.77715 | Lats2         |
| 31004 | -1.12972 | 12.0946  | -4.09547 | 0.000815 | 0.011156 | -0.50196 | Rab1          |
| 37547 | -1.12984 | 11.40645 | -4.2135  | 0.000635 | 0.0101   | -0.26364 | Ptges2        |

|       |          |          |          |          |          |          |          |
|-------|----------|----------|----------|----------|----------|----------|----------|
| 4778  | -1.12991 | 8.605907 | -4.2355  | 0.000606 | 0.010014 | -0.21926 | Lig4     |
| 51974 | -1.13    | 9.511279 | -3.29654 | 0.004459 | 0.024985 | -2.11605 | Kctd3    |
| 6427  | -1.1304  | 12.41602 | -4.34661 | 0.00048  | 0.009113 | 0.004333 | Slc25a12 |
| 3852  | -1.13041 | 10.8108  | -3.13752 | 0.006244 | 0.030326 | -2.43286 | Pcna     |
| 56648 | -1.13042 | 11.47059 | -3.93038 | 0.001157 | 0.012818 | -0.83611 | Cbr4     |
| 27432 | -1.13045 | 7.368033 | -5.9651  | 1.83E-05 | 0.002941 | 3.120178 | Gm6416   |
| 33636 | -1.13055 | 9.719693 | -3.91831 | 0.001187 | 0.012963 | -0.86055 | Wrnip1   |
| 12158 | -1.13058 | 9.748159 | -3.83367 | 0.001421 | 0.013969 | -1.03206 | Snx16    |
| 22705 | -1.13077 | 11.73232 | -4.04956 | 0.000898 | 0.011523 | -0.59482 | Usp2     |
| 50018 | -1.13081 | 10.03282 | -3.71077 | 0.001846 | 0.015643 | -1.28104 | Baz2b    |
| 33612 | -1.13096 | 13.51358 | -3.5051  | 0.002861 | 0.019749 | -1.69685 | Mrps16   |
| 62544 | -1.13106 | 12.53761 | -3.76879 | 0.001632 | 0.014858 | -1.16351 | Ttc3     |
| 14867 | -1.13108 | 9.664814 | -3.79398 | 0.001546 | 0.014574 | -1.11249 | Zfp131   |
| 11699 | -1.13111 | 13.80144 | -5.24843 | 7.48E-05 | 0.004894 | 1.779871 | Timm17a  |
| 13008 | -1.13146 | 13.17018 | -3.7709  | 0.001624 | 0.014835 | -1.15923 | Paip2    |
| 16255 | -1.13148 | 12.07729 | -2.8966  | 0.010361 | 0.041217 | -2.90604 | Rcn3     |
| 7998  | -1.13178 | 10.9561  | -3.45938 | 0.003154 | 0.020669 | -1.78903 | Rab2a    |
| 21824 | -1.13179 | 11.12829 | -3.34238 | 0.004045 | 0.023591 | -2.02421 | Tmem132a |
| 11880 | -1.13188 | 11.31554 | -3.9249  | 0.00117  | 0.012871 | -0.84722 | Psm6     |
| 47801 | -1.13195 | 11.12139 | -3.93068 | 0.001156 | 0.012818 | -0.8355  | Zhx3     |
| 27435 | -1.13196 | 9.448412 | -4.54648 | 0.000316 | 0.007649 | 0.404499 | Nedd4l   |
| 20951 | -1.13213 | 12.73132 | -4.04211 | 0.000913 | 0.011622 | -0.60989 | Mrpl41   |
| 25326 | -1.1322  | 14.1327  | -3.73526 | 0.001752 | 0.015284 | -1.23144 | Chchd1   |
| 28785 | -1.13234 | 10.78246 | -3.82103 | 0.00146  | 0.014191 | -1.05767 | Fance    |
| 6240  | -1.13275 | 9.571865 | -4.00016 | 0.000998 | 0.012046 | -0.6948  | Tmem14a  |
| 5201  | -1.13325 | 11.05521 | -4.17233 | 0.000693 | 0.010378 | -0.3467  | Hagh     |



|       |          |          |          |          |          |          |          |
|-------|----------|----------|----------|----------|----------|----------|----------|
| 21519 | -1.13354 | 8.593499 | -3.96775 | 0.001069 | 0.01237  | -0.76041 | Ado      |
| 25335 | -1.13391 | 12.80286 | -4.05478 | 0.000888 | 0.01149  | -0.58426 | Serinc1  |
| 11424 | -1.13427 | 13.40629 | -3.11852 | 0.0065   | 0.031028 | -2.4705  | Nudt4    |
| 18928 | -1.13446 | 8.590011 | -4.52641 | 0.000329 | 0.007758 | 0.364452 | Magohb   |
| 45746 | -1.13461 | 10.72112 | -3.50593 | 0.002856 | 0.019739 | -1.69517 | Srsf3    |
| 3563  | -1.13524 | 9.469488 | -3.70615 | 0.001864 | 0.015677 | -1.2904  | Ahcyl1   |
| 62173 | -1.13525 | 10.49746 | -3.90359 | 0.001225 | 0.013165 | -0.89037 | B4galt3  |
| 29779 | -1.13533 | 9.953261 | -3.27554 | 0.004662 | 0.02559  | -2.15805 | Sp1      |
| 4019  | -1.13536 | 10.85986 | -3.26794 | 0.004738 | 0.025809 | -2.17323 | Casc3    |
| 45600 | -1.13539 | 11.89909 | -4.83777 | 0.000173 | 0.006133 | 0.981631 | Ptp4a3   |
| 19323 | -1.13572 | 10.85354 | -3.48939 | 0.002959 | 0.020032 | -1.72853 | Otud4    |
| 30611 | -1.13585 | 12.48153 | -4.06302 | 0.000873 | 0.011432 | -0.56758 | Tmem141  |
| 33810 | -1.1359  | 11.19582 | -4.16016 | 0.000711 | 0.010492 | -0.37127 | Coasy    |
| 60078 | -1.13598 | 9.591716 | -3.71487 | 0.00183  | 0.015573 | -1.27274 | Exosc8   |
| 16666 | -1.13609 | 9.838808 | -3.95445 | 0.001099 | 0.012519 | -0.78736 | Gpatch8  |
| 38160 | -1.13614 | 8.244104 | -4.43487 | 0.000399 | 0.008456 | 0.181405 | Lcor     |
| 59082 | -1.1364  | 10.00291 | -5.28421 | 6.96E-05 | 0.004827 | 1.848457 | Tln2     |
| 3292  | -1.13644 | 15.776   | -4.74835 | 0.000208 | 0.006636 | 0.805325 | Ndufa1   |
| 41860 | -1.13648 | 12.29509 | -3.66786 | 0.002023 | 0.016409 | -1.36791 | Hibch    |
| 57960 | -1.13655 | 8.413243 | -4.12816 | 0.000761 | 0.010779 | -0.43591 | Trmt11   |
| 6446  | -1.1366  | 11.95458 | -3.43036 | 0.003355 | 0.021378 | -1.84744 | Jkamp    |
| 23478 | -1.13695 | 14.26235 | -4.28527 | 0.000546 | 0.009554 | -0.11903 | Tmem59   |
| 39940 | -1.13701 | 13.40569 | -4.374   | 0.000453 | 0.008944 | 0.059341 | Aurkaip1 |
| 35491 | -1.13708 | 10.13191 | -4.45622 | 0.000381 | 0.008263 | 0.224156 | Med4     |
| 34428 | -1.13712 | 11.81297 | -3.86805 | 0.001321 | 0.013502 | -0.9624  | Qdpr     |
| 3476  | -1.13723 | 10.06329 | -4.98403 | 0.000128 | 0.005764 | 1.268162 | Csl      |

|       |          |          |          |          |          |          |         |
|-------|----------|----------|----------|----------|----------|----------|---------|
| 15908 | -1.13729 | 11.5726  | -4.07633 | 0.000849 | 0.011306 | -0.54067 | Echdc3  |
| 27475 | -1.13738 | 9.755234 | -3.52582 | 0.002738 | 0.01928  | -1.65504 | Uhrf2   |
| 28552 | -1.13748 | 8.716685 | -4.18379 | 0.000676 | 0.010327 | -0.32356 | Erlec1  |
| 14775 | -1.13749 | 9.667095 | -3.4018  | 0.003565 | 0.022063 | -1.90489 | Ano1    |
| 52975 | -1.13761 | 7.889498 | -3.48307 | 0.002999 | 0.020248 | -1.74127 | Rgs18   |
| 11991 | -1.13768 | 10.94398 | -4.11944 | 0.000775 | 0.010871 | -0.45351 | Mal     |
| 47859 | -1.13783 | 13.29368 | -3.75351 | 0.001685 | 0.015038 | -1.19446 | Acaa1a  |
| 6402  | -1.13786 | 12.57841 | -4.46595 | 0.000373 | 0.008171 | 0.243612 | Entpd4  |
| 44880 | -1.13786 | 8.415588 | -3.78229 | 0.001585 | 0.014676 | -1.13615 | Tlcd2   |
| 24326 | -1.13788 | 11.72713 | -3.46039 | 0.003147 | 0.020649 | -1.78697 | Ebp     |
| 21335 | -1.1379  | 10.01166 | -3.71783 | 0.001819 | 0.015552 | -1.26674 | Nab2    |
| 34236 | -1.13803 | 10.62949 | -4.03197 | 0.000932 | 0.011729 | -0.6304  | Bcas2   |
| 41168 | -1.13811 | 11.93216 | -3.89796 | 0.001239 | 0.013202 | -0.90179 | Zfp703  |
| 27998 | -1.13813 | 11.82431 | -3.47414 | 0.003056 | 0.020437 | -1.75927 | Pten    |
| 33548 | -1.13831 | 10.22022 | -3.76178 | 0.001656 | 0.014915 | -1.17771 | Zfp1    |
| 29321 | -1.13838 | 10.46164 | -3.60066 | 0.002334 | 0.017655 | -1.50386 | Cyb5d2  |
| 17    | -1.13843 | 10.94024 | -4.01623 | 0.000964 | 0.011923 | -0.66227 | Cops3   |
| 49403 | -1.13847 | 11.96901 | -5.00043 | 0.000124 | 0.005707 | 1.300142 | Sdr39u1 |
| 58657 | -1.13865 | 12.89033 | -3.37659 | 0.003761 | 0.022767 | -1.95556 | Dexi    |
| 56160 | -1.13935 | 12.62042 | -4.0795  | 0.000843 | 0.011277 | -0.53425 | Mrps7   |
| 48008 | -1.13962 | 11.21868 | -3.39438 | 0.003622 | 0.022279 | -1.9198  | Dynlt1c |
| 25247 | -1.13963 | 12.27894 | -3.72321 | 0.001798 | 0.015472 | -1.25583 | Zfp46   |
| 55153 | -1.14046 | 11.63958 | -4.21829 | 0.000629 | 0.0101   | -0.25397 | Ppm1l   |
| 43381 | -1.14068 | 12.23911 | -3.52862 | 0.002722 | 0.019218 | -1.6494  | Me1     |
| 10216 | -1.14079 | 14.43805 | -4.2247  | 0.00062  | 0.010087 | -0.24104 | Hspa5   |
| 13633 | -1.1412  | 8.726369 | -4.30434 | 0.000524 | 0.009438 | -0.08065 | Nlrp10  |

|       |          |          |          |          |          |          |          |
|-------|----------|----------|----------|----------|----------|----------|----------|
| 35225 | -1.14136 | 12.06438 | -3.85509 | 0.001358 | 0.013732 | -0.98865 | Dus1l    |
| 14390 | -1.14153 | 11.10086 | -3.87319 | 0.001306 | 0.013449 | -0.95197 | Tcea3    |
| 48448 | -1.14159 | 9.955289 | -4.12995 | 0.000758 | 0.010755 | -0.43227 | Tsfm     |
| 56478 | -1.14165 | 13.38801 | -4.37459 | 0.000452 | 0.008944 | 0.060516 | Coq6     |
| 14280 | -1.14211 | 9.89694  | -4.85346 | 0.000167 | 0.006078 | 1.012467 | Rufy1    |
| 23722 | -1.14218 | 12.92976 | -3.41687 | 0.003453 | 0.021703 | -1.87459 | Spcl1    |
| 40742 | -1.1422  | 11.00126 | -3.19854 | 0.005488 | 0.028092 | -2.31164 | Fkbp10   |
| 60988 | -1.14222 | 11.91507 | -3.57129 | 0.002485 | 0.018311 | -1.56322 | Klhl9    |
| 20724 | -1.14225 | 10.07537 | -3.54748 | 0.002614 | 0.018768 | -1.61132 | Oxsr1    |
| 26652 | -1.14234 | 14.06826 | -4.2071  | 0.000644 | 0.010117 | -0.27653 | Pdcd5    |
| 59760 | -1.14243 | 11.2843  | -3.64586 | 0.00212  | 0.016831 | -1.41243 | Thap4    |
| 3515  | -1.14249 | 9.141083 | -4.3966  | 0.000432 | 0.008717 | 0.104692 | Tiprl    |
| 39840 | -1.14317 | 10.07808 | -4.08504 | 0.000833 | 0.011248 | -0.52305 | Pqlc1    |
| 7917  | -1.14323 | 9.457991 | -3.75001 | 0.001698 | 0.015061 | -1.20157 | Ilf2     |
| 31489 | -1.14345 | 9.812379 | -4.01138 | 0.000974 | 0.011974 | -0.67209 | Msh3     |
| 22596 | -1.1436  | 12.88362 | -3.43274 | 0.003338 | 0.021299 | -1.84265 | Psmal    |
| 52068 | -1.14365 | 10.84431 | -4.07072 | 0.000859 | 0.011362 | -0.55201 | Insig2   |
| 38234 | -1.14373 | 10.20699 | -4.28684 | 0.000544 | 0.009554 | -0.11587 | Snrpb    |
| 60878 | -1.144   | 12.17324 | -3.94717 | 0.001116 | 0.012572 | -0.80209 | Fgfr1op2 |
| 58150 | -1.14441 | 11.40259 | -3.59009 | 0.002387 | 0.017879 | -1.52522 | Micall1  |
| 17502 | -1.14444 | 11.13129 | -3.41702 | 0.003451 | 0.021703 | -1.87428 | Comm7    |
| 15475 | -1.14451 | 10.99671 | -5.13785 | 9.35E-05 | 0.005355 | 1.566891 | Fxn      |
| 61704 | -1.14471 | 13.74161 | -5.08907 | 0.000103 | 0.0055   | 1.472473 | Hibadh   |
| 56954 | -1.1453  | 8.445763 | -3.90453 | 0.001222 | 0.013159 | -0.88847 | Prkar2b  |
| 33432 | -1.14564 | 8.888049 | -3.78097 | 0.00159  | 0.014684 | -1.13883 | Zfp326   |
| 6950  | -1.14587 | 12.25896 | -3.38013 | 0.003733 | 0.022676 | -1.94844 | Rgs5     |

|       |          |          |          |          |          |          |          |
|-------|----------|----------|----------|----------|----------|----------|----------|
| 58169 | -1.14637 | 11.62524 | -4.03869 | 0.000919 | 0.011683 | -0.61681 | Hmgb3    |
| 43006 | -1.14638 | 9.188062 | -5.12425 | 9.62E-05 | 0.00542  | 1.540604 | Llgl2    |
| 52150 | -1.14646 | 12.14976 | -3.74294 | 0.001724 | 0.015191 | -1.21587 | Hbxip    |
| 2391  | -1.14647 | 10.11723 | -3.92474 | 0.001171 | 0.012871 | -0.84753 | Ralgapa2 |
| 7496  | -1.14655 | 9.969894 | -3.37603 | 0.003766 | 0.022782 | -1.95668 | Kcnj12   |
| 39448 | -1.14658 | 8.390681 | -5.37814 | 5.77E-05 | 0.004414 | 2.02771  | Fastkd3  |
| 8088  | -1.14659 | 11.3664  | -3.96746 | 0.001069 | 0.01237  | -0.761   | Sypl     |
| 46096 | -1.1466  | 10.5487  | -3.28884 | 0.004532 | 0.025185 | -2.13145 | Oste     |
| 19459 | -1.14672 | 12.35483 | -3.39408 | 0.003624 | 0.022284 | -1.9204  | Csnk1d   |
| 44322 | -1.14678 | 12.27107 | -4.1991  | 0.000655 | 0.010181 | -0.29268 | Ptpmt1   |
| 30712 | -1.14682 | 9.124554 | -4.43973 | 0.000395 | 0.008418 | 0.191127 | Slc30a5  |
| 34102 | -1.14686 | 14.79002 | -5.11077 | 9.88E-05 | 0.005444 | 1.514512 | Ndufb5   |
| 36092 | -1.14704 | 12.91719 | -4.19486 | 0.00066  | 0.010244 | -0.30122 | Btbd1    |
| 12462 | -1.14704 | 8.847927 | -3.54397 | 0.002634 | 0.018815 | -1.61839 | Ncapd3   |
| 32702 | -1.14714 | 13.70208 | -3.36464 | 0.003858 | 0.022944 | -1.97954 | Sdpr     |
| 2204  | -1.14731 | 10.06739 | -3.42649 | 0.003383 | 0.021485 | -1.85524 | Fbxw7    |
| 59149 | -1.14759 | 11.87226 | -3.57088 | 0.002487 | 0.018311 | -1.56405 | Rbms1    |
| 24986 | -1.14762 | 10.96505 | -3.98316 | 0.001034 | 0.012241 | -0.72921 | Mepce    |
| 6039  | -1.14809 | 14.26551 | -4.40394 | 0.000425 | 0.008651 | 0.119412 | Hsd17b10 |
| 27467 | -1.14809 | 8.650232 | -4.98214 | 0.000128 | 0.005774 | 1.264486 | Slc41a1  |
| 33553 | -1.14813 | 13.48101 | -4.50108 | 0.000347 | 0.007904 | 0.313868 | Tufm     |
| 32848 | -1.14833 | 8.91528  | -3.95017 | 0.001109 | 0.012525 | -0.79601 | Sort1    |
| 47970 | -1.14845 | 9.421246 | -3.83533 | 0.001416 | 0.013953 | -1.02869 | Magt1    |
| 4846  | -1.14853 | 11.89022 | -2.83841 | 0.011697 | 0.04463  | -3.01877 | Psma6    |
| 24475 | -1.14856 | 9.807697 | -3.79911 | 0.00153  | 0.014474 | -1.10208 | Itsn2    |
| 2746  | -1.1486  | 9.289917 | -3.96608 | 0.001072 | 0.01238  | -0.7638  | Lzic     |

|       |          |          |          |          |          |          |          |
|-------|----------|----------|----------|----------|----------|----------|----------|
| 33313 | -1.14887 | 10.117   | -4.14883 | 0.000728 | 0.010604 | -0.39414 | Papd5    |
| 14469 | -1.1495  | 9.696027 | -4.42787 | 0.000404 | 0.008482 | 0.167369 | Dot1l    |
| 34540 | -1.14959 | 11.69756 | -4.03024 | 0.000936 | 0.011742 | -0.63392 | Rhbdd3   |
| 46513 | -1.14975 | 8.414828 | -5.38207 | 5.73E-05 | 0.004414 | 2.035179 | Nt5c3l   |
| 3374  | -1.14984 | 12.92998 | -3.45993 | 0.00315  | 0.020663 | -1.78791 | Map1lc3b |
| 11787 | -1.14993 | 9.698894 | -3.35048 | 0.003976 | 0.023361 | -2.00795 | Kbtbd4   |
| 23780 | -1.15005 | 11.38187 | -2.96363 | 0.009005 | 0.03784  | -2.77537 | Trappc4  |
| 4245  | -1.15011 | 9.339348 | -4.01478 | 0.000967 | 0.011933 | -0.6652  | Cradd    |
| 37575 | -1.15017 | 13.08728 | -4.5614  | 0.000306 | 0.007568 | 0.434237 | Anxa6    |
| 21584 | -1.15017 | 11.78499 | -3.57914 | 0.002444 | 0.018153 | -1.54736 | Rsl1d1   |
| 2517  | -1.1502  | 13.29687 | -4.30774 | 0.000521 | 0.009396 | -0.0738  | Grpel1   |
| 50529 | -1.1506  | 10.30124 | -3.76161 | 0.001657 | 0.014915 | -1.17805 | Pld2     |
| 49133 | -1.1507  | 8.51927  | -5.53912 | 4.19E-05 | 0.00398  | 2.332154 | Mlxip    |
| 37591 | -1.15103 | 15.53373 | -5.10656 | 9.97E-05 | 0.005451 | 1.506348 | Ak1      |
| 16405 | -1.15106 | 11.88467 | -4.49427 | 0.000352 | 0.007957 | 0.300259 | Def8     |
| 44446 | -1.15113 | 9.847999 | -4.5159  | 0.000336 | 0.007874 | 0.343471 | Gja1     |
| 42352 | -1.15118 | 10.98615 | -3.74007 | 0.001734 | 0.015225 | -1.2217  | Eed      |
| 56449 | -1.15174 | 8.490952 | -5.97565 | 1.79E-05 | 0.002925 | 3.13936  | Pank1    |
| 3294  | -1.15185 | 9.422303 | -4.10717 | 0.000795 | 0.011053 | -0.47832 | Zfx      |
| 27072 | -1.15192 | 12.25798 | -3.80839 | 0.0015   | 0.014345 | -1.08328 | Lypla2   |
| 8347  | -1.15202 | 10.05618 | -3.9351  | 0.001145 | 0.012794 | -0.82655 | Dhodh    |
| 50082 | -1.15213 | 12.50136 | -3.22131 | 0.00523  | 0.027369 | -2.2663  | Dpm3     |
| 46074 | -1.15223 | 9.817105 | -3.7853  | 0.001575 | 0.014645 | -1.13007 | Slc31a2  |
| 1676  | -1.15225 | 11.23359 | -3.99617 | 0.001006 | 0.012068 | -0.70286 | Polr1a   |
| 59630 | -1.15259 | 15.66535 | -4.26908 | 0.000565 | 0.009682 | -0.15162 | Hint1    |
| 32652 | -1.15261 | 12.10203 | -4.39091 | 0.000437 | 0.008789 | 0.093272 | Pank4    |

|       |          |          |          |          |          |          |               |
|-------|----------|----------|----------|----------|----------|----------|---------------|
| 32443 | -1.15262 | 11.00573 | -5.02633 | 0.000117 | 0.005645 | 1.350601 | Pin1-ps1      |
| 5212  | -1.15287 | 12.67508 | -4.59824 | 0.000283 | 0.007333 | 0.50762  | Atad3a        |
| 11363 | -1.15325 | 8.98925  | -4.95915 | 0.000135 | 0.005828 | 1.219601 | Klhl24        |
| 36656 | -1.1535  | 11.40482 | -3.79506 | 0.001543 | 0.014565 | -1.11029 | Pepd          |
| 16402 | -1.1536  | 10.41897 | -4.30924 | 0.000519 | 0.00939  | -0.07079 | Mapk9         |
| 18519 | -1.15378 | 10.82208 | -3.9297  | 0.001159 | 0.012818 | -0.83748 | Lars2         |
| 81    | -1.15418 | 11.17786 | -3.90257 | 0.001227 | 0.013169 | -0.89244 | Ckap5         |
| 119   | -1.15439 | 9.665154 | -3.99498 | 0.001009 | 0.012068 | -0.70527 | Tmem149       |
| 46343 | -1.15531 | 13.5312  | -3.79101 | 0.001556 | 0.014594 | -1.11849 | Tef           |
| 28536 | -1.15538 | 8.926184 | -4.16667 | 0.000701 | 0.010424 | -0.35813 | Zmym2         |
| 2206  | -1.15561 | 12.37024 | -4.08879 | 0.000827 | 0.011211 | -0.51547 | LOC100042049  |
| 56369 | -1.15565 | 10.74736 | -4.28665 | 0.000544 | 0.009554 | -0.11624 | Slc25a33      |
| 57391 | -1.15573 | 10.98753 | -4.00768 | 0.000982 | 0.011995 | -0.67957 | Ppp2r2a       |
| 44105 | -1.15576 | 14.37612 | -3.10079 | 0.006748 | 0.031748 | -2.5056  | Hbb-b2        |
| 18620 | -1.15588 | 10.86186 | -3.48662 | 0.002976 | 0.020126 | -1.73412 | Sec11a        |
| 2013  | -1.1562  | 13.91097 | -4.09786 | 0.000811 | 0.011114 | -0.49713 | Scp2          |
| 56348 | -1.15624 | 8.796118 | -4.63086 | 0.000265 | 0.007222 | 0.572476 | Rif1          |
| 61345 | -1.15625 | 10.68923 | -4.37076 | 0.000456 | 0.008954 | 0.052825 | D930015E06Rik |
| 32860 | -1.15644 | 11.73624 | -4.4813  | 0.000362 | 0.008029 | 0.274315 | Ttc12         |
| 41569 | -1.15648 | 12.95895 | -4.20554 | 0.000646 | 0.010122 | -0.27969 | Fars2         |
| 46850 | -1.15649 | 12.10053 | -2.93913 | 0.009479 | 0.038983 | -2.82322 | Zfp361l       |
| 61864 | -1.15658 | 8.763005 | -4.23586 | 0.000606 | 0.010014 | -0.21854 | Dph2          |
| 9877  | -1.1566  | 10.18643 | -3.83871 | 0.001406 | 0.013923 | -1.02185 | Naa38         |
| 59608 | -1.15666 | 10.9763  | -4.59139 | 0.000287 | 0.007378 | 0.49397  | Ptd2          |
| 20084 | -1.15682 | 10.75558 | -4.05452 | 0.000889 | 0.01149  | -0.58479 | Chkb          |
| 46377 | -1.15684 | 9.876899 | -4.05594 | 0.000886 | 0.01149  | -0.58191 | Supv3l1       |

|       |          |          |          |          |          |          |           |
|-------|----------|----------|----------|----------|----------|----------|-----------|
| 43809 | -1.15702 | 10.10305 | -4.05508 | 0.000888 | 0.01149  | -0.58364 | Polr2b    |
| 33445 | -1.15748 | 10.17901 | -4.00171 | 0.000994 | 0.012039 | -0.69165 | Iars2     |
| 698   | -1.15769 | 10.76322 | -4.18838 | 0.00067  | 0.010276 | -0.31429 | Mobkl3    |
| 28046 | -1.15772 | 10.04977 | -3.80356 | 0.001515 | 0.014418 | -1.09307 | Ssbp3     |
| 47036 | -1.15782 | 8.039893 | -3.77291 | 0.001617 | 0.014799 | -1.15517 | Gfra3     |
| 29566 | -1.15789 | 9.682738 | -3.81573 | 0.001476 | 0.014271 | -1.06841 | Rap2a     |
| 7480  | -1.15792 | 9.907715 | -3.46052 | 0.003146 | 0.020649 | -1.78673 | Ftsj1     |
| 54032 | -1.15816 | 11.65244 | -3.42279 | 0.003409 | 0.021579 | -1.86268 | Ppap2b    |
| 28727 | -1.15836 | 9.076084 | -3.89909 | 0.001236 | 0.013202 | -0.89949 | Cct6a     |
| 36531 | -1.15887 | 8.866828 | -3.91093 | 0.001206 | 0.013064 | -0.87551 | AK010878  |
| 33795 | -1.15907 | 12.2975  | -4.12186 | 0.000771 | 0.010847 | -0.44863 | Dnajb5    |
| 11550 | -1.1592  | 11.63129 | -4.21659 | 0.000631 | 0.0101   | -0.2574  | Raph1     |
| 13915 | -1.15937 | 11.8697  | -4.00148 | 0.000995 | 0.012039 | -0.69211 | Nop10     |
| 43816 | -1.15945 | 11.89824 | -3.77912 | 0.001596 | 0.014708 | -1.14258 | Cobra1    |
| 57221 | -1.15947 | 13.44178 | -3.53498 | 0.002685 | 0.01902  | -1.63656 | Pcbp1     |
| 32775 | -1.15949 | 9.36481  | -3.64865 | 0.002107 | 0.016791 | -1.40679 | Abhd5     |
| 24225 | -1.15972 | 9.637757 | -3.95508 | 0.001098 | 0.012515 | -0.78607 | Arhgef17  |
| 17729 | -1.15991 | 10.26164 | -4.02809 | 0.00094  | 0.011752 | -0.63827 | Man1a2    |
| 12251 | -1.1601  | 8.124804 | -4.43375 | 0.0004   | 0.008456 | 0.179158 | Zfp809    |
| 13610 | -1.1602  | 9.685486 | -4.06382 | 0.000872 | 0.011419 | -0.56597 | Amy1      |
| 11874 | -1.1605  | 10.51037 | -5.25849 | 7.33E-05 | 0.004873 | 1.799165 | Clpp      |
| 32915 | -1.16059 | 9.397986 | -4.16237 | 0.000707 | 0.010472 | -0.3668  | Rnf139    |
| 1100  | -1.16063 | 11.73785 | -3.6352  | 0.002169 | 0.017052 | -1.43401 | Spast     |
| 2943  | -1.1608  | 8.144064 | -4.0523  | 0.000893 | 0.01149  | -0.58928 | Ccdc117   |
| 6767  | -1.16102 | 10.96257 | -4.2332  | 0.000609 | 0.010041 | -0.2239  | Cux1      |
| 13506 | -1.16107 | 7.871966 | -6.47241 | 7.03E-06 | 0.002346 | 4.023353 | D9Ert402e |

|       |          |          |          |          |          |          |         |
|-------|----------|----------|----------|----------|----------|----------|---------|
| 38899 | -1.16126 | 11.09258 | -3.76507 | 0.001645 | 0.014895 | -1.17106 | Gbp1    |
| 19334 | -1.16133 | 14.09858 | -4.16685 | 0.000701 | 0.010424 | -0.35775 | Lrtm1   |
| 61280 | -1.16135 | 9.128834 | -4.14468 | 0.000734 | 0.010615 | -0.40253 | Cmpk1   |
| 5825  | -1.16143 | 10.51693 | -3.76785 | 0.001635 | 0.014876 | -1.16543 | Khk     |
| 51289 | -1.16147 | 10.54741 | -3.92468 | 0.001171 | 0.012871 | -0.84766 | Eif3e   |
| 48205 | -1.16154 | 8.461856 | -5.24537 | 7.53E-05 | 0.004894 | 1.77399  | Slc22a5 |
| 48156 | -1.16198 | 10.93203 | -3.91531 | 0.001195 | 0.013013 | -0.86663 | Fbxo9   |
| 43359 | -1.16218 | 10.72804 | -4.27766 | 0.000555 | 0.009599 | -0.13434 | Ncoa1   |
| 37039 | -1.16225 | 11.34734 | -4.43823 | 0.000396 | 0.008424 | 0.188132 | Amz2    |
| 19147 | -1.16237 | 9.921157 | -3.93215 | 0.001153 | 0.012818 | -0.83251 | Hectd1  |
| 56140 | -1.16245 | 10.75758 | -4.39898 | 0.00043  | 0.008694 | 0.109466 | Fnip1   |
| 31846 | -1.16251 | 11.66478 | -3.50875 | 0.002839 | 0.019696 | -1.68949 | Fbxw11  |
| 645   | -1.16259 | 11.08842 | -2.86624 | 0.011038 | 0.043126 | -2.96493 | Capza2  |
| 8134  | -1.16262 | 8.594672 | -4.70679 | 0.000226 | 0.006827 | 0.723117 | Smpd2   |
| 9812  | -1.16289 | 9.071594 | -3.59689 | 0.002353 | 0.017724 | -1.51148 | Slc6a9  |
| 58338 | -1.16296 | 8.923098 | -4.21515 | 0.000633 | 0.0101   | -0.26031 | Ebag9   |
| 29112 | -1.16306 | 14.06114 | -4.20433 | 0.000647 | 0.010126 | -0.28211 | Ndufc2  |
| 46604 | -1.16326 | 9.415109 | -4.34842 | 0.000478 | 0.009113 | 0.007971 | Nit2    |
| 46048 | -1.16366 | 10.05649 | -4.18915 | 0.000668 | 0.010268 | -0.31275 | Gga2    |
| 46054 | -1.16373 | 12.90398 | -4.35328 | 0.000473 | 0.009089 | 0.017725 | Akt2    |
| 57163 | -1.16386 | 14.34121 | -4.31956 | 0.000508 | 0.009336 | -0.05003 | Akr1b3  |
| 38424 | -1.16388 | 13.81723 | -4.45009 | 0.000386 | 0.008301 | 0.211877 | Mrpl23  |
| 15974 | -1.16396 | 9.609921 | -4.16279 | 0.000707 | 0.010472 | -0.36596 | Zrsr1   |
| 13087 | -1.16399 | 10.58287 | -3.57134 | 0.002485 | 0.018311 | -1.56312 | Zfp655  |
| 32299 | -1.16411 | 10.24499 | -4.22855 | 0.000615 | 0.010087 | -0.23329 | Tti1    |
| 58578 | -1.16445 | 10.90843 | -4.40005 | 0.000429 | 0.008694 | 0.111601 | Herc4   |



|       |          |          |          |          |          |          |          |
|-------|----------|----------|----------|----------|----------|----------|----------|
| 43755 | -1.16448 | 10.71663 | -3.76617 | 0.001641 | 0.014895 | -1.16882 | Pmpca    |
| 16566 | -1.16479 | 11.20623 | -4.15257 | 0.000722 | 0.010601 | -0.38659 | Anapc1   |
| 25107 | -1.16493 | 11.65332 | -4.21061 | 0.000639 | 0.010115 | -0.26945 | Smu1     |
| 62407 | -1.16526 | 9.980844 | -3.71039 | 0.001848 | 0.015649 | -1.2818  | Mina     |
| 6462  | -1.1654  | 7.690099 | -5.36991 | 5.87E-05 | 0.004449 | 2.012038 | Slc25a16 |
| 13308 | -1.16558 | 13.65936 | -4.36804 | 0.000459 | 0.008954 | 0.047374 | Mrpl30   |
| 4108  | -1.16592 | 12.68351 | -3.39786 | 0.003595 | 0.022168 | -1.9128  | Hmgn1    |
| 41549 | -1.16658 | 11.85763 | -4.28022 | 0.000552 | 0.00958  | -0.12919 | E2f6     |
| 30343 | -1.16668 | 10.74685 | -3.36154 | 0.003884 | 0.023027 | -1.98577 | Tsen54   |
| 16886 | -1.16669 | 13.72166 | -4.27859 | 0.000554 | 0.009598 | -0.13247 | Bola3    |
| 24010 | -1.16687 | 12.32352 | -4.24727 | 0.000591 | 0.009918 | -0.19556 | Mmaa     |
| 9597  | -1.16695 | 13.43696 | -4.22529 | 0.000619 | 0.010087 | -0.23985 | Fdx1     |
| 27398 | -1.16769 | 13.01707 | -5.43294 | 5.17E-05 | 0.004303 | 2.131741 | Art1     |
| 46581 | -1.16829 | 8.885463 | -4.59583 | 0.000285 | 0.007333 | 0.502812 | Ept1     |
| 31621 | -1.16832 | 9.094488 | -3.18281 | 0.005674 | 0.028611 | -2.34293 | Ecm2     |
| 42689 | -1.16845 | 11.61092 | -3.8308  | 0.00143  | 0.014017 | -1.03786 | Snrrnp27 |
| 17619 | -1.16882 | 9.467077 | -3.99818 | 0.001002 | 0.012061 | -0.6988  | Taf12    |
| 3056  | -1.16892 | 14.71218 | -4.03054 | 0.000935 | 0.011742 | -0.63331 | Gm5623   |
| 60374 | -1.16893 | 13.66175 | -4.3578  | 0.000469 | 0.009046 | 0.026806 | Mat2a    |
| 1843  | -1.16894 | 13.35173 | -4.00551 | 0.000986 | 0.01201  | -0.68397 | Fam54b   |
| 32755 | -1.16894 | 12.32734 | -4.65373 | 0.000253 | 0.007106 | 0.617907 | Aarsd1   |
| 27414 | -1.16911 | 11.1735  | -4.93359 | 0.000142 | 0.005859 | 1.169625 | Mavs     |
| 49406 | -1.1692  | 13.05357 | -4.2151  | 0.000633 | 0.0101   | -0.2604  | Cxx1b    |
| 29252 | -1.16928 | 8.583435 | -4.94179 | 0.000139 | 0.005859 | 1.185648 | Ppil3    |
| 6910  | -1.16928 | 11.73217 | -5.42978 | 5.21E-05 | 0.004313 | 2.125747 | Usf2     |
| 60474 | -1.16952 | 8.751128 | -3.91256 | 0.001202 | 0.013032 | -0.8722  | Gm7265   |

|       |          |          |          |          |          |          |         |
|-------|----------|----------|----------|----------|----------|----------|---------|
| 21608 | -1.16952 | 11.23373 | -3.92747 | 0.001164 | 0.012845 | -0.84199 | Dnajb2  |
| 58187 | -1.16953 | 13.19407 | -4.12705 | 0.000762 | 0.010783 | -0.43814 | Pmpcb   |
| 1315  | -1.16992 | 9.361439 | -4.26815 | 0.000566 | 0.009682 | -0.15349 | Mterfd1 |
| 27039 | -1.16993 | 11.08612 | -3.69719 | 0.0019   | 0.015852 | -1.30854 | Lass4   |
| 29076 | -1.17007 | 10.42918 | -3.66119 | 0.002052 | 0.016558 | -1.3814  | Acss2   |
| 58688 | -1.17014 | 9.012396 | -5.09751 | 0.000102 | 0.005481 | 1.488831 | Gpam    |
| 41042 | -1.17023 | 11.83123 | -3.75336 | 0.001686 | 0.015038 | -1.19478 | Eiflax  |
| 8569  | -1.1703  | 12.48814 | -3.63849 | 0.002153 | 0.016977 | -1.42733 | Trim35  |
| 36808 | -1.17033 | 10.41193 | -4.62543 | 0.000268 | 0.007229 | 0.561701 | Vps25   |
| 28802 | -1.17045 | 9.323118 | -3.84375 | 0.001391 | 0.013865 | -1.01163 | Stard8  |
| 47571 | -1.17075 | 11.49115 | -5.54896 | 4.11E-05 | 0.00398  | 2.35066  | Pla2g16 |
| 31046 | -1.17077 | 10.97823 | -4.27364 | 0.000559 | 0.009638 | -0.14243 | Rnfl67  |
| 24725 | -1.17083 | 10.07087 | -3.73876 | 0.001739 | 0.015236 | -1.22436 | Farsb   |
| 20994 | -1.1709  | 8.275347 | -4.83762 | 0.000173 | 0.006133 | 0.981332 | Cdk20   |
| 59102 | -1.17131 | 11.52771 | -3.68928 | 0.001933 | 0.016018 | -1.32454 | Pnol    |
| 33386 | -1.17134 | 10.52384 | -3.38797 | 0.003671 | 0.022464 | -1.9327  | Smchd1  |
| 49189 | -1.17169 | 8.344476 | -4.76182 | 0.000202 | 0.006581 | 0.831928 | Lingo3  |
| 61796 | -1.17185 | 9.115646 | -4.94739 | 0.000138 | 0.005859 | 1.1966   | Pdss2   |
| 15247 | -1.17212 | 12.74052 | -4.22467 | 0.00062  | 0.010087 | -0.2411  | Tceb1   |
| 33701 | -1.17213 | 10.01957 | -4.47388 | 0.000367 | 0.008089 | 0.259482 | Eif2b1  |
| 48874 | -1.17224 | 12.55909 | -4.51792 | 0.000335 | 0.007855 | 0.347507 | Map3k4  |
| 45910 | -1.17225 | 12.85135 | -4.07138 | 0.000858 | 0.011353 | -0.55069 | Mrps26  |
| 22410 | -1.17252 | 8.836708 | -4.15876 | 0.000713 | 0.010508 | -0.37408 | Fam149b |
| 8504  | -1.17277 | 10.10669 | -3.40842 | 0.003515 | 0.021892 | -1.89158 | Med21   |
| 28080 | -1.17277 | 9.650935 | -4.28644 | 0.000544 | 0.009554 | -0.11667 | Mrps11  |
| 47261 | -1.17308 | 15.58263 | -6.56822 | 5.89E-06 | 0.002346 | 4.189478 | Usmg5   |

|       |          |          |          |          |          |          |          |
|-------|----------|----------|----------|----------|----------|----------|----------|
| 46896 | -1.1732  | 11.54249 | -3.84061 | 0.0014   | 0.013919 | -1.01799 | Cdk4     |
| 2883  | -1.17355 | 12.37982 | -4.63495 | 0.000263 | 0.007219 | 0.580609 | Vegfb    |
| 55108 | -1.17357 | 10.55074 | -3.5016  | 0.002883 | 0.019805 | -1.7039  | Emilin2  |
| 12743 | -1.1737  | 10.23953 | -3.56783 | 0.002503 | 0.018361 | -1.57021 | Snx13    |
| 8158  | -1.17379 | 10.45841 | -4.0247  | 0.000947 | 0.011777 | -0.64513 | Ccdc28a  |
| 30580 | -1.1738  | 12.32836 | -3.8619  | 0.001338 | 0.013616 | -0.97484 | Actr10   |
| 19530 | -1.17383 | 10.93678 | -3.59204 | 0.002378 | 0.01784  | -1.52128 | Sipa1    |
| 12201 | -1.17391 | 9.255525 | -4.19762 | 0.000657 | 0.010204 | -0.29567 | Chrm2    |
| 50276 | -1.17393 | 8.592793 | -4.45551 | 0.000382 | 0.008264 | 0.222723 | Gin1     |
| 9288  | -1.17394 | 10.70764 | -2.81263 | 0.012341 | 0.0461   | -3.06846 | Serf1    |
| 47213 | -1.1743  | 9.528931 | -3.72906 | 0.001776 | 0.01537  | -1.244   | Taf2     |
| 34584 | -1.17438 | 10.71281 | -4.1903  | 0.000667 | 0.010268 | -0.31044 | R3hdm1   |
| 41215 | -1.17444 | 9.494315 | -4.90528 | 0.00015  | 0.005914 | 1.114172 | Gm12824  |
| 22205 | -1.17445 | 9.608435 | -3.54895 | 0.002606 | 0.018758 | -1.60835 | Bcl10    |
| 46964 | -1.17458 | 11.38221 | -4.21757 | 0.00063  | 0.0101   | -0.25542 | Tfg      |
| 4007  | -1.17474 | 11.10612 | -3.21118 | 0.005343 | 0.02765  | -2.28647 | Cbfb     |
| 50944 | -1.1749  | 10.11839 | -3.9217  | 0.001178 | 0.012895 | -0.85369 | Kpna1    |
| 30278 | -1.17502 | 10.83346 | -4.32579 | 0.000501 | 0.009325 | -0.03751 | Surf1    |
| 18191 | -1.17506 | 10.15078 | -3.77403 | 0.001613 | 0.014782 | -1.15289 | Gls      |
| 35103 | -1.17509 | 9.0428   | -4.74969 | 0.000207 | 0.006636 | 0.807962 | Gdpd1    |
| 56490 | -1.17513 | 9.691762 | -4.30077 | 0.000528 | 0.009458 | -0.08782 | Epm2aip1 |
| 6105  | -1.17519 | 11.50974 | -4.17452 | 0.000689 | 0.010365 | -0.34226 | Kri1     |
| 43241 | -1.17535 | 12.05022 | -4.16763 | 0.0007   | 0.010424 | -0.35618 | Bzw2     |
| 52989 | -1.17542 | 11.87033 | -4.93429 | 0.000142 | 0.005859 | 1.170992 | Commd1   |
| 14562 | -1.17562 | 12.15388 | -3.64459 | 0.002126 | 0.016859 | -1.415   | Atp6v1e1 |
| 21355 | -1.17579 | 10.14364 | -4.22511 | 0.00062  | 0.010087 | -0.24022 | Arl1     |

|       |          |          |          |          |          |          |           |
|-------|----------|----------|----------|----------|----------|----------|-----------|
| 34727 | -1.17581 | 14.27573 | -4.50783 | 0.000342 | 0.007904 | 0.327344 | Eef1g     |
| 43407 | -1.17587 | 7.562917 | -3.5016  | 0.002883 | 0.019805 | -1.70392 | Kcnj3     |
| 37477 | -1.17627 | 13.85426 | -4.60514 | 0.000279 | 0.007327 | 0.521345 | Mrpl4     |
| 40597 | -1.17639 | 14.36158 | -3.77371 | 0.001615 | 0.014783 | -1.15354 | Tesc      |
| 134   | -1.1766  | 11.76652 | -4.83762 | 0.000173 | 0.006133 | 0.981328 | Mrpl28    |
| 14738 | -1.1767  | 12.57346 | -3.46378 | 0.003124 | 0.020606 | -1.78015 | Gm4130    |
| 53174 | -1.1768  | 14.30132 | -5.16142 | 8.92E-05 | 0.005274 | 1.612427 | Sdhc      |
| 51014 | -1.17731 | 12.68978 | -3.67737 | 0.001982 | 0.016253 | -1.34865 | Gabarapl2 |
| 33203 | -1.17746 | 10.87981 | -4.03523 | 0.000926 | 0.011716 | -0.62381 | Spes2     |
| 25294 | -1.17757 | 10.37343 | -4.28177 | 0.00055  | 0.009575 | -0.12607 | Wdr5      |
| 35942 | -1.17765 | 10.46077 | -4.93618 | 0.000141 | 0.005859 | 1.174692 | Zfyve19   |
| 9206  | -1.17776 | 10.69087 | -4.32046 | 0.000507 | 0.009336 | -0.04824 | Dolk      |
| 32023 | -1.1778  | 12.14252 | -4.14232 | 0.000738 | 0.010638 | -0.40729 | Tbca      |
| 59798 | -1.17781 | 10.84056 | -3.81352 | 0.001483 | 0.014288 | -1.07288 | Wbp11     |
| 37314 | -1.17801 | 10.66727 | -3.8002  | 0.001526 | 0.014459 | -1.09988 | Rgl3      |
| 50027 | -1.17811 | 10.25297 | -3.84828 | 0.001378 | 0.013821 | -1.00245 | Slc30a9   |
| 61436 | -1.1785  | 10.49937 | -3.68489 | 0.001951 | 0.016103 | -1.33344 | Ppmlm     |
| 55062 | -1.17879 | 11.9927  | -3.82377 | 0.001451 | 0.01415  | -1.05211 | Zer1      |
| 46462 | -1.17887 | 10.77847 | -4.10723 | 0.000795 | 0.011053 | -0.47818 | Mapk1ip1  |
| 56684 | -1.17937 | 11.15899 | -3.2944  | 0.004479 | 0.025054 | -2.12032 | Rbm18     |
| 15022 | -1.17952 | 12.90026 | -4.57428 | 0.000298 | 0.007471 | 0.459901 | Tmem143   |
| 52402 | -1.17956 | 10.34548 | -4.25899 | 0.000577 | 0.009765 | -0.17194 | Fam132a   |
| 26588 | -1.18002 | 9.801111 | -4.18032 | 0.000681 | 0.010327 | -0.33057 | Pex3      |
| 18966 | -1.18053 | 9.541896 | -3.42147 | 0.003419 | 0.021615 | -1.86533 | Lrrc33    |
| 2589  | -1.18086 | 7.849409 | -4.0725  | 0.000856 | 0.011339 | -0.54842 | Gm7120    |
| 16564 | -1.18104 | 10.38146 | -3.57611 | 0.00246  | 0.018215 | -1.55349 | Syne2     |

|       |          |          |          |          |          |          |               |
|-------|----------|----------|----------|----------|----------|----------|---------------|
| 56634 | -1.18147 | 10.54247 | -4.36583 | 0.000461 | 0.008954 | 0.042935 | Uqcc          |
| 36949 | -1.18215 | 10.21807 | -3.7022  | 0.00188  | 0.015749 | -1.29838 | Atg5          |
| 36529 | -1.18216 | 12.42798 | -3.82125 | 0.001459 | 0.014191 | -1.05722 | H3f3a         |
| 20591 | -1.18257 | 9.738725 | -2.77147 | 0.013442 | 0.0487   | -3.14755 | Folr2         |
| 41543 | -1.18282 | 9.330915 | -4.26289 | 0.000572 | 0.009722 | -0.16409 | C330018D20Rik |
| 13830 | -1.18304 | 11.99597 | -4.21013 | 0.00064  | 0.010117 | -0.27042 | Spag9         |
| 43589 | -1.18312 | 13.8541  | -4.90639 | 0.00015  | 0.005914 | 1.11635  | Acat1         |
| 30291 | -1.18315 | 13.28527 | -3.92356 | 0.001174 | 0.012879 | -0.84992 | Canx          |
| 36934 | -1.18337 | 12.73289 | -4.8657  | 0.000163 | 0.006036 | 1.03653  | Samm50        |
| 61849 | -1.18343 | 9.002632 | -6.42493 | 7.67E-06 | 0.002382 | 3.940493 | Crat          |
| 52019 | -1.1836  | 11.97295 | -3.4416  | 0.003276 | 0.021098 | -1.82482 | Ythdc1        |
| 17408 | -1.18463 | 9.365702 | -3.76902 | 0.001631 | 0.014858 | -1.16306 | Snapc3        |
| 17978 | -1.18465 | 9.256586 | -4.16041 | 0.00071  | 0.010492 | -0.37077 | Mtrf11        |
| 11442 | -1.18536 | 9.768775 | -3.76882 | 0.001631 | 0.014858 | -1.16346 | Nhlrc1        |
| 42520 | -1.18547 | 11.19174 | -3.80682 | 0.001505 | 0.014364 | -1.08645 | Asxl1         |
| 47139 | -1.18553 | 9.084787 | -4.5732  | 0.000299 | 0.007471 | 0.45776  | Prkrir        |
| 2708  | -1.18578 | 8.952427 | -4.66719 | 0.000246 | 0.007001 | 0.644622 | Arl3          |
| 38074 | -1.18581 | 10.6255  | -4.21284 | 0.000636 | 0.0101   | -0.26496 | Hsd3b7        |
| 30268 | -1.18591 | 12.4368  | -4.2183  | 0.000629 | 0.0101   | -0.25396 | Mfn1          |
| 47152 | -1.18625 | 11.29427 | -3.74926 | 0.001701 | 0.015072 | -1.20308 | Hspa14        |
| 23953 | -1.18629 | 9.428305 | -3.73604 | 0.001749 | 0.015275 | -1.22985 | Cdk5          |
| 22012 | -1.18675 | 9.52124  | -4.16335 | 0.000706 | 0.010472 | -0.36483 | Lrfr4         |
| 23820 | -1.18688 | 9.853088 | -4.75493 | 0.000205 | 0.006627 | 0.818313 | Sbk1          |
| 60244 | -1.18706 | 9.739782 | -3.70929 | 0.001852 | 0.01565  | -1.28403 | Rnd3          |
| 39386 | -1.18712 | 12.34598 | -4.0159  | 0.000965 | 0.011925 | -0.66293 | Trappc21      |
| 2961  | -1.18722 | 13.29484 | -4.97759 | 0.00013  | 0.00578  | 1.255605 | Psmel         |

|       |          |          |          |          |          |          |           |
|-------|----------|----------|----------|----------|----------|----------|-----------|
| 16090 | -1.18742 | 9.786946 | -3.83399 | 0.00142  | 0.013969 | -1.0314  | Zbtb44    |
| 24821 | -1.1877  | 9.461614 | -3.94398 | 0.001124 | 0.012635 | -0.80857 | Zfp777    |
| 32835 | -1.18822 | 9.165872 | -3.49211 | 0.002942 | 0.019992 | -1.72305 | Fam43a    |
| 25998 | -1.18827 | 14.54603 | -4.97735 | 0.00013  | 0.00578  | 1.255129 | Vdac3     |
| 57838 | -1.1884  | 10.22885 | -4.53794 | 0.000321 | 0.007678 | 0.387453 | Fig4      |
| 14149 | -1.18859 | 9.774806 | -3.96914 | 0.001065 | 0.012358 | -0.7576  | Tnfaip8   |
| 12560 | -1.18867 | 13.28008 | -3.72957 | 0.001774 | 0.01537  | -1.24297 | Acad11    |
| 34497 | -1.18876 | 10.86083 | -3.65659 | 0.002072 | 0.016636 | -1.39071 | Gpank1    |
| 49641 | -1.18882 | 13.83031 | -4.24447 | 0.000595 | 0.009954 | -0.20119 | LOC675851 |
| 42641 | -1.1889  | 9.757101 | -4.09308 | 0.000819 | 0.011164 | -0.50679 | Zbtb40    |
| 10288 | -1.18896 | 10.64771 | -4.11947 | 0.000775 | 0.010871 | -0.45346 | Stard3    |
| 47408 | -1.1892  | 12.72119 | -4.534   | 0.000324 | 0.007686 | 0.379593 | Rpl22l1   |
| 21492 | -1.18937 | 10.0897  | -4.6378  | 0.000261 | 0.007218 | 0.586279 | Kif16b    |
| 1532  | -1.18967 | 16.01514 | -5.0981  | 0.000101 | 0.005481 | 1.489962 | Acadv1    |
| 34933 | -1.18994 | 10.33491 | -4.28336 | 0.000548 | 0.009571 | -0.12288 | Cldn12    |
| 45606 | -1.19007 | 13.95911 | -4.74784 | 0.000208 | 0.006636 | 0.80432  | Mrps21    |
| 22545 | -1.19029 | 11.97905 | -3.65515 | 0.002078 | 0.016675 | -1.39363 | Polr2k    |
| 372   | -1.19034 | 13.30158 | -4.39785 | 0.000431 | 0.008702 | 0.1072   | Mrpl53    |
| 62928 | -1.19066 | 8.751282 | -4.31408 | 0.000514 | 0.009341 | -0.06105 | Nhsl1     |
| 21193 | -1.19093 | 10.17866 | -3.95363 | 0.001101 | 0.01252  | -0.78901 | Prpf18    |
| 39749 | -1.19099 | 9.859871 | -4.01099 | 0.000975 | 0.011974 | -0.67286 | Rab28     |
| 44678 | -1.19103 | 9.043593 | -4.4325  | 0.000401 | 0.008456 | 0.176641 | Fbxo10    |
| 56132 | -1.19111 | 9.336756 | -4.70931 | 0.000225 | 0.006827 | 0.72809  | Pex26     |
| 16350 | -1.19143 | 8.416773 | -4.49576 | 0.000351 | 0.007948 | 0.303224 | Gtf2e1    |
| 44734 | -1.19144 | 11.72215 | -4.09941 | 0.000808 | 0.011101 | -0.49399 | Eif3f     |
| 54762 | -1.19158 | 11.24122 | -3.86817 | 0.00132  | 0.013502 | -0.96214 | Zfp260    |

|       |          |          |          |          |          |          |              |
|-------|----------|----------|----------|----------|----------|----------|--------------|
| 50334 | -1.19166 | 8.909154 | -4.06575 | 0.000868 | 0.011414 | -0.56207 | Sec24d       |
| 45572 | -1.19175 | 15.30358 | -5.71035 | 2.99E-05 | 0.003707 | 2.652066 | LOC100504871 |
| 44170 | -1.19199 | 12.32403 | -4.50116 | 0.000347 | 0.007904 | 0.314012 | Tmem11       |
| 3654  | -1.19222 | 9.710069 | -4.82281 | 0.000178 | 0.006182 | 0.952179 | Mrps2        |
| 14196 | -1.1924  | 9.536499 | -3.39557 | 0.003613 | 0.022245 | -1.91742 | Mex3c        |
| 15999 | -1.19247 | 10.46306 | -4.06505 | 0.000869 | 0.011417 | -0.56347 | Rcor3        |
| 2109  | -1.19256 | 10.73024 | -4.15162 | 0.000724 | 0.010601 | -0.3885  | Pex19        |
| 33397 | -1.19277 | 7.359689 | -2.97443 | 0.008803 | 0.037224 | -2.75425 | Gpm6a        |
| 47390 | -1.19287 | 11.39364 | -4.07172 | 0.000857 | 0.011351 | -0.54999 | Zcche17      |
| 40356 | -1.19294 | 7.326504 | -3.77919 | 0.001596 | 0.014708 | -1.14244 | Clec18a      |
| 28929 | -1.19299 | 11.46999 | -3.7333  | 0.00176  | 0.01531  | -1.23541 | Cnot6l       |
| 617   | -1.19326 | 9.49919  | -3.83893 | 0.001405 | 0.013923 | -1.02139 | Zbtb5        |
| 57114 | -1.19333 | 9.740429 | -3.96655 | 0.001071 | 0.012374 | -0.76284 | H2afx        |
| 48784 | -1.19333 | 12.50258 | -4.3706  | 0.000456 | 0.008954 | 0.052516 | Acot7        |
| 28365 | -1.19397 | 8.918296 | -4.41961 | 0.000412 | 0.008563 | 0.150819 | Med20        |
| 7130  | -1.19419 | 10.21037 | -3.63531 | 0.002168 | 0.017052 | -1.43378 | Derl1        |
| 38288 | -1.19423 | 12.29553 | -3.81754 | 0.001471 | 0.014231 | -1.06474 | Rnf7         |
| 29906 | -1.19435 | 15.55405 | -4.81393 | 0.000181 | 0.006223 | 0.934702 | Rpl14        |
| 29538 | -1.19436 | 11.43963 | -4.48472 | 0.000359 | 0.008021 | 0.281154 | Mrpl40       |
| 12662 | -1.19442 | 10.98043 | -3.20205 | 0.005448 | 0.027933 | -2.30466 | Mlxipl       |
| 29692 | -1.19448 | 9.986045 | -3.4816  | 0.003008 | 0.02028  | -1.74423 | Rab3il1      |
| 6680  | -1.19453 | 14.48796 | -4.89767 | 0.000153 | 0.005922 | 1.099264 | Anapc13      |
| 35392 | -1.19462 | 8.78381  | -4.8365  | 0.000173 | 0.006133 | 0.979127 | Eif4e3       |
| 38248 | -1.1948  | 9.298362 | -3.85901 | 0.001346 | 0.013656 | -0.9807  | Zfp612       |
| 51056 | -1.19524 | 11.21394 | -4.38067 | 0.000447 | 0.008891 | 0.072722 | Zswim7       |
| 12401 | -1.19581 | 8.033606 | -4.73814 | 0.000212 | 0.006665 | 0.785135 | Ehhadh       |

|       |          |          |          |          |          |          |          |
|-------|----------|----------|----------|----------|----------|----------|----------|
| 48591 | -1.19584 | 11.9888  | -4.68752 | 0.000235 | 0.006899 | 0.684938 | Kcnk3    |
| 20076 | -1.1959  | 11.52714 | -4.05399 | 0.00089  | 0.01149  | -0.58586 | Hsbp1    |
| 45646 | -1.19593 | 13.1358  | -4.61713 | 0.000272 | 0.007278 | 0.545189 | Me3      |
| 37582 | -1.19607 | 10.4123  | -3.97795 | 0.001046 | 0.012301 | -0.73976 | Fbxl12   |
| 3764  | -1.19636 | 10.63927 | -4.18525 | 0.000674 | 0.010316 | -0.32061 | Slc27a1  |
| 26766 | -1.19646 | 9.313212 | -3.4436  | 0.003262 | 0.021061 | -1.82079 | Fgl2     |
| 9917  | -1.19653 | 11.47308 | -4.38344 | 0.000444 | 0.008871 | 0.078283 | Map2k5   |
| 18648 | -1.19661 | 11.86154 | -3.80673 | 0.001505 | 0.014364 | -1.08665 | Csnk2a1  |
| 40523 | -1.19683 | 10.93104 | -3.89572 | 0.001245 | 0.013205 | -0.90632 | Cdk18    |
| 14920 | -1.19687 | 9.861174 | -3.91418 | 0.001197 | 0.013013 | -0.86893 | Trak1    |
| 43872 | -1.19729 | 9.491039 | -3.89862 | 0.001238 | 0.013202 | -0.90046 | Tmem111  |
| 48420 | -1.19748 | 12.34913 | -6.72599 | 4.41E-06 | 0.002346 | 4.459912 | Asb2     |
| 5968  | -1.19758 | 9.931832 | -4.67364 | 0.000242 | 0.006971 | 0.657416 | Matr3    |
| 30141 | -1.19782 | 12.583   | -3.80487 | 0.001511 | 0.014396 | -1.09042 | Cd164    |
| 7642  | -1.1979  | 9.793817 | -4.27706 | 0.000555 | 0.009599 | -0.13556 | AI314976 |
| 33652 | -1.19805 | 10.37396 | -4.55043 | 0.000313 | 0.007617 | 0.412365 | Rpain    |
| 57833 | -1.19816 | 10.229   | -4.20965 | 0.00064  | 0.010117 | -0.27139 | Wdr82    |
| 26235 | -1.19861 | 9.215944 | -5.02652 | 0.000117 | 0.005645 | 1.350969 | Calr3    |
| 29618 | -1.19893 | 14.01915 | -4.57152 | 0.0003   | 0.007478 | 0.454403 | Timm23   |
| 12502 | -1.19905 | 13.09749 | -4.51499 | 0.000337 | 0.007877 | 0.341652 | Higd1a   |
| 60448 | -1.19939 | 13.60159 | -5.09323 | 0.000102 | 0.005491 | 1.480533 | Cmya5    |
| 49314 | -1.19955 | 13.71977 | -3.76551 | 0.001643 | 0.014895 | -1.17016 | Ran      |
| 20183 | -1.19955 | 11.60166 | -4.31583 | 0.000512 | 0.009337 | -0.05754 | Jtb      |
| 54487 | -1.19956 | 10.45383 | -5.244   | 7.55E-05 | 0.004894 | 1.77136  | Abtb2    |
| 40603 | -1.19956 | 11.58472 | -4.22258 | 0.000623 | 0.0101   | -0.24533 | Sgpp1    |
| 61307 | -1.19969 | 16.03233 | -5.21927 | 7.94E-05 | 0.004967 | 1.72386  | Etfb     |



|       |          |          |          |          |          |          |          |
|-------|----------|----------|----------|----------|----------|----------|----------|
| 20035 | -1.19971 | 9.407489 | -4.3698  | 0.000457 | 0.008954 | 0.050913 | Zfp407   |
| 31605 | -1.19987 | 8.878338 | -3.44061 | 0.003282 | 0.021115 | -1.82681 | Mrvi1    |
| 9526  | -1.20007 | 10.12484 | -4.30348 | 0.000525 | 0.009438 | -0.08238 | Cav2     |
| 2137  | -1.20014 | 10.75737 | -3.74607 | 0.001712 | 0.015125 | -1.20954 | Metap1   |
| 21068 | -1.20024 | 13.76683 | -3.5157  | 0.002797 | 0.01956  | -1.67547 | Mapksp1  |
| 35081 | -1.20027 | 10.5638  | -4.94378 | 0.000139 | 0.005859 | 1.18954  | Whrn     |
| 48547 | -1.20069 | 12.52685 | -5.11381 | 9.82E-05 | 0.005435 | 1.520384 | Car14    |
| 56570 | -1.20091 | 12.95958 | -4.61425 | 0.000274 | 0.007296 | 0.539461 | Trip10   |
| 43820 | -1.20091 | 13.05885 | -4.32318 | 0.000504 | 0.009325 | -0.04276 | Psmc2    |
| 41082 | -1.20109 | 11.511   | -3.96887 | 0.001066 | 0.012359 | -0.75815 | Bccip    |
| 30782 | -1.20119 | 12.17335 | -3.75814 | 0.001669 | 0.01499  | -1.18509 | Smpdl3a  |
| 23903 | -1.20192 | 11.37332 | -3.23004 | 0.005134 | 0.027049 | -2.24889 | Nacc2    |
| 35570 | -1.20207 | 9.025091 | -4.07825 | 0.000845 | 0.011283 | -0.53678 | Ap4s1    |
| 22916 | -1.20222 | 10.89459 | -3.68551 | 0.001948 | 0.016103 | -1.33217 | Nufip2   |
| 37336 | -1.2026  | 11.02095 | -4.14836 | 0.000729 | 0.010606 | -0.3951  | Dedd2    |
| 50608 | -1.20263 | 10.25394 | -3.65804 | 0.002066 | 0.016609 | -1.38779 | Zfp207   |
| 1526  | -1.20271 | 12.62063 | -5.23443 | 7.70E-05 | 0.004951 | 1.752986 | Oxa11    |
| 31183 | -1.20275 | 10.80604 | -3.72279 | 0.001799 | 0.015473 | -1.25668 | Syap1    |
| 10697 | -1.2028  | 14.2825  | -3.25871 | 0.004831 | 0.026053 | -2.19168 | Cpe      |
| 27350 | -1.20288 | 8.726936 | -4.65104 | 0.000254 | 0.007111 | 0.612565 | Npc1     |
| 20296 | -1.20299 | 9.567565 | -4.06021 | 0.000878 | 0.011455 | -0.57327 | Timm9    |
| 50493 | -1.20338 | 9.668092 | -3.03694 | 0.00772  | 0.034366 | -2.63156 | Tmprss13 |
| 9697  | -1.2034  | 11.07685 | -3.72526 | 0.00179  | 0.015421 | -1.25169 | Rexo4    |
| 62338 | -1.20343 | 13.24191 | -3.91633 | 0.001192 | 0.013001 | -0.86456 | Prdx1    |
| 15349 | -1.20362 | 8.806428 | -3.54456 | 0.002631 | 0.018815 | -1.61721 | Cggbp1   |
| 54540 | -1.2037  | 9.972492 | -3.92027 | 0.001182 | 0.012921 | -0.85658 | Dido1    |

|       |          |          |          |          |          |          |           |
|-------|----------|----------|----------|----------|----------|----------|-----------|
| 50862 | -1.20387 | 9.815172 | -4.45782 | 0.00038  | 0.008257 | 0.227351 | Laptm4b   |
| 60731 | -1.20437 | 9.815715 | -4.13642 | 0.000747 | 0.010709 | -0.4192  | Seh1l     |
| 28379 | -1.20439 | 10.25519 | -3.82388 | 0.001451 | 0.01415  | -1.0519  | Lztf1l    |
| 35071 | -1.20456 | 10.66159 | -4.01204 | 0.000973 | 0.011974 | -0.67075 | Zfp191    |
| 26226 | -1.20473 | 9.826754 | -3.83372 | 0.001421 | 0.013969 | -1.03195 | Ssr2      |
| 26460 | -1.20474 | 8.344197 | -5.59168 | 3.78E-05 | 0.0039   | 2.430793 | Frem2     |
| 42405 | -1.20489 | 9.211943 | -4.89211 | 0.000154 | 0.005923 | 1.088351 | Fn3k      |
| 29132 | -1.20502 | 11.56197 | -4.74481 | 0.000209 | 0.00664  | 0.798334 | Ednra     |
| 26861 | -1.20541 | 9.620185 | -4.58003 | 0.000294 | 0.007457 | 0.471351 | Arl2      |
| 44353 | -1.20566 | 12.76591 | -4.54978 | 0.000313 | 0.007617 | 0.411067 | Csnk2b    |
| 51457 | -1.2057  | 12.44225 | -3.7805  | 0.001591 | 0.014692 | -1.13979 | Agpat2    |
| 21070 | -1.20573 | 11.74538 | -4.16335 | 0.000706 | 0.010472 | -0.36483 | Dennd4b   |
| 42129 | -1.20596 | 10.47866 | -4.2031  | 0.000649 | 0.010138 | -0.2846  | Lrrc20    |
| 13480 | -1.206   | 15.05279 | -5.6441  | 3.41E-05 | 0.003805 | 2.528778 | D10Jhu81e |
| 14433 | -1.20604 | 15.12089 | -5.53801 | 4.20E-05 | 0.00398  | 2.330081 | Ndufa7    |
| 62015 | -1.20629 | 9.743243 | -4.48668 | 0.000358 | 0.008021 | 0.285071 | Sh3rf2    |
| 27272 | -1.20655 | 9.845952 | -4.03606 | 0.000924 | 0.011716 | -0.62213 | Cetn3     |
| 21727 | -1.20667 | 12.21975 | -3.74633 | 0.001711 | 0.015124 | -1.20902 | Slmo2     |
| 20424 | -1.20682 | 13.36441 | -4.06418 | 0.000871 | 0.011417 | -0.56524 | Ctbp1     |
| 48299 | -1.20683 | 11.09616 | -5.61101 | 3.64E-05 | 0.0039   | 2.466979 | Anks1     |
| 3597  | -1.20698 | 14.60064 | -3.45346 | 0.003194 | 0.020825 | -1.80095 | Tomm5     |
| 8210  | -1.20749 | 13.81012 | -4.56476 | 0.000304 | 0.007532 | 0.440943 | Ghitm     |
| 1496  | -1.20769 | 12.93854 | -4.36814 | 0.000458 | 0.008954 | 0.047581 | Cops7a    |
| 16330 | -1.20783 | 13.47113 | -4.63319 | 0.000264 | 0.007219 | 0.577105 | Trpc4ap   |
| 40720 | -1.20785 | 8.496402 | -5.72098 | 2.93E-05 | 0.003693 | 2.671785 | Cacnb2    |
| 29630 | -1.20805 | 12.11508 | -3.4979  | 0.002906 | 0.019874 | -1.71138 | Nptn      |

|       |          |          |          |          |          |          |          |
|-------|----------|----------|----------|----------|----------|----------|----------|
| 30492 | -1.20807 | 9.995363 | -4.0698  | 0.000861 | 0.01137  | -0.55386 | Gm6616   |
| 9690  | -1.20811 | 9.262722 | -4.50971 | 0.000341 | 0.007904 | 0.331106 | Pik3r4   |
| 53787 | -1.20854 | 9.794639 | -5.02931 | 0.000117 | 0.005645 | 1.356391 | Hmbs     |
| 39321 | -1.20879 | 11.17789 | -3.79669 | 0.001537 | 0.014542 | -1.10698 | Smg6     |
| 57368 | -1.20895 | 12.54062 | -4.05719 | 0.000884 | 0.011479 | -0.57939 | Raf1     |
| 27701 | -1.20905 | 12.06596 | -3.94986 | 0.00111  | 0.012525 | -0.79664 | Slc20a2  |
| 57353 | -1.20917 | 10.95541 | -4.31625 | 0.000511 | 0.009337 | -0.0567  | Scrn2    |
| 27508 | -1.20943 | 10.10705 | -3.89361 | 0.001251 | 0.013205 | -0.91059 | Sec13    |
| 43702 | -1.2096  | 9.227623 | -4.39879 | 0.00043  | 0.008694 | 0.109074 | Esrrg    |
| 48039 | -1.20966 | 9.745275 | -3.8075  | 0.001502 | 0.014362 | -1.08507 | Dnajb9   |
| 32505 | -1.2098  | 12.71644 | -4.18977 | 0.000668 | 0.010268 | -0.31149 | Ulk1     |
| 11468 | -1.20985 | 8.977755 | -3.97272 | 0.001057 | 0.012341 | -0.75036 | Tmem126b |
| 59344 | -1.21015 | 9.259878 | -3.70749 | 0.001859 | 0.01565  | -1.28768 | Tcf21    |
| 27216 | -1.21017 | 9.544127 | -4.6694  | 0.000244 | 0.007001 | 0.649    | Zfp672   |
| 50156 | -1.21024 | 11.12667 | -4.40327 | 0.000426 | 0.008651 | 0.118067 | Lclat1   |
| 32914 | -1.21038 | 9.098622 | -4.12365 | 0.000768 | 0.010819 | -0.44501 | Nmb      |
| 12923 | -1.21041 | 9.385372 | -4.50354 | 0.000345 | 0.007904 | 0.318774 | Slc39a3  |
| 24718 | -1.21063 | 14.29221 | -4.57482 | 0.000298 | 0.007471 | 0.460986 | Alas1    |
| 59043 | -1.21089 | 10.38185 | -4.08613 | 0.000831 | 0.011247 | -0.52085 | Hcfc1    |
| 26360 | -1.21097 | 8.790754 | -4.2364  | 0.000605 | 0.010014 | -0.21746 | Gtf2h3   |
| 25478 | -1.21102 | 14.53217 | -5.0624  | 0.000109 | 0.005572 | 1.420725 | Ndufs4   |
| 23246 | -1.21117 | 10.56329 | -4.15523 | 0.000718 | 0.010559 | -0.38121 | Ccrn4l   |
| 22308 | -1.2112  | 11.67902 | -3.95336 | 0.001102 | 0.01252  | -0.78956 | Pdgfa    |
| 44697 | -1.21123 | 9.619174 | -4.28658 | 0.000544 | 0.009554 | -0.11638 | Tnni3k   |
| 10774 | -1.21158 | 10.61775 | -3.89335 | 0.001252 | 0.013205 | -0.91113 | Yaf2     |
| 42700 | -1.21169 | 12.1179  | -4.14081 | 0.00074  | 0.010661 | -0.41035 | Zfand3   |

|       |          |          |          |          |          |          |          |
|-------|----------|----------|----------|----------|----------|----------|----------|
| 26447 | -1.21216 | 13.23368 | -4.50656 | 0.000343 | 0.007904 | 0.324807 | C1qbp    |
| 17494 | -1.21333 | 12.21365 | -3.54916 | 0.002605 | 0.018756 | -1.60793 | Hnrpd1   |
| 16120 | -1.21371 | 9.746747 | -4.02775 | 0.000941 | 0.011752 | -0.63894 | Dapk1    |
| 17466 | -1.21374 | 11.05451 | -3.68159 | 0.001965 | 0.016156 | -1.34012 | Dhdh     |
| 40258 | -1.21377 | 10.04084 | -4.12677 | 0.000763 | 0.010783 | -0.43871 | Fundc1   |
| 27063 | -1.21378 | 11.84587 | -4.81186 | 0.000182 | 0.006231 | 0.930623 | Timm17b  |
| 27263 | -1.21386 | 10.12135 | -5.02836 | 0.000117 | 0.005645 | 1.354541 | Agap1    |
| 59723 | -1.21394 | 10.74651 | -4.18713 | 0.000671 | 0.01029  | -0.31683 | Clcc1    |
| 16985 | -1.21429 | 8.940861 | -3.9029  | 0.001226 | 0.013166 | -0.89177 | Eif2a    |
| 38970 | -1.21467 | 7.513736 | -5.15122 | 9.10E-05 | 0.005319 | 1.592717 | Slc38a4  |
| 14549 | -1.21469 | 8.735509 | -4.1819  | 0.000679 | 0.010327 | -0.32739 | Hpd1     |
| 11819 | -1.21486 | 11.00306 | -3.81788 | 0.00147  | 0.014231 | -1.06404 | Rfwd3    |
| 9738  | -1.21502 | 10.2278  | -5.01387 | 0.00012  | 0.005671 | 1.326327 | Irx4     |
| 18413 | -1.21554 | 11.96331 | -3.88663 | 0.00127  | 0.013275 | -0.92475 | Fam125b  |
| 50975 | -1.21598 | 11.97991 | -4.32457 | 0.000502 | 0.009325 | -0.03996 | Mrpl47   |
| 30908 | -1.21605 | 12.20847 | -4.01536 | 0.000966 | 0.01193  | -0.66403 | Slc25a13 |
| 42291 | -1.21622 | 10.84167 | -4.27736 | 0.000555 | 0.009599 | -0.13495 | Ezr      |
| 55742 | -1.21662 | 10.85739 | -4.43866 | 0.000395 | 0.008424 | 0.188983 | Scnm1    |
| 5400  | -1.21694 | 11.10411 | -4.05121 | 0.000895 | 0.011496 | -0.59148 | Mrpl44   |
| 7209  | -1.21733 | 13.19374 | -4.01633 | 0.000964 | 0.011923 | -0.66206 | Htra1    |
| 28302 | -1.21747 | 11.77734 | -4.36866 | 0.000458 | 0.008954 | 0.048621 | Qars     |
| 4383  | -1.21751 | 14.13985 | -4.46978 | 0.00037  | 0.008133 | 0.251286 | Dnajc15  |
| 22798 | -1.21759 | 11.17807 | -5.21498 | 8.00E-05 | 0.004967 | 1.715606 | Mrps9    |
| 6899  | -1.21763 | 10.87088 | -4.61642 | 0.000273 | 0.00728  | 0.543784 | Cenpv    |
| 60885 | -1.21796 | 11.25478 | -3.78034 | 0.001592 | 0.014692 | -1.1401  | Golga7   |
| 22144 | -1.21814 | 12.72385 | -5.11771 | 9.74E-05 | 0.005435 | 1.527949 | Phpt1    |

|       |          |          |          |          |          |          |          |
|-------|----------|----------|----------|----------|----------|----------|----------|
| 28859 | -1.21824 | 10.48604 | -3.74219 | 0.001727 | 0.015206 | -1.2174  | Las1l    |
| 34547 | -1.21826 | 7.948455 | -6.07062 | 1.49E-05 | 0.002865 | 3.311266 | Adhfe1   |
| 23334 | -1.21826 | 11.81654 | -3.99674 | 0.001005 | 0.012068 | -0.70173 | Slc29a1  |
| 61438 | -1.21862 | 7.9984   | -4.78327 | 0.000193 | 0.006391 | 0.874276 | Amph     |
| 13849 | -1.21869 | 11.35123 | -3.95995 | 0.001086 | 0.012477 | -0.77621 | Opa1     |
| 9190  | -1.21878 | 11.66161 | -4.6556  | 0.000252 | 0.007106 | 0.621627 | Nudt19   |
| 42471 | -1.219   | 13.00255 | -4.17837 | 0.000684 | 0.010338 | -0.3345  | Glr5     |
| 14551 | -1.21914 | 12.11776 | -4.221   | 0.000625 | 0.0101   | -0.24851 | Gm4535   |
| 7218  | -1.21924 | 10.51682 | -4.57929 | 0.000295 | 0.007459 | 0.46989  | Ubiad1   |
| 20671 | -1.21959 | 8.545656 | -5.38972 | 5.64E-05 | 0.004397 | 2.049722 | Fastkd1  |
| 26493 | -1.21976 | 11.57896 | -3.09785 | 0.00679  | 0.031887 | -2.51141 | Ammecr1l |
| 10912 | -1.21995 | 8.211941 | -4.20634 | 0.000645 | 0.010117 | -0.27807 | Pigz     |
| 2799  | -1.22007 | 9.073293 | -3.78465 | 0.001577 | 0.014645 | -1.13139 | Bmper    |
| 21546 | -1.22011 | 12.44515 | -4.6991  | 0.00023  | 0.006871 | 0.707869 | Hdac5    |
| 52063 | -1.22037 | 9.582519 | -5.49819 | 4.54E-05 | 0.004091 | 2.25509  | Pvrl2    |
| 34666 | -1.22051 | 13.02694 | -3.8412  | 0.001398 | 0.013908 | -1.01679 | Txndc17  |
| 17787 | -1.22064 | 8.24099  | -5.16361 | 8.88E-05 | 0.005274 | 1.616641 | Lysmd4   |
| 5421  | -1.22071 | 10.32201 | -2.93401 | 0.009581 | 0.039249 | -2.83321 | Bace2    |
| 253   | -1.22108 | 8.561173 | -4.13818 | 0.000745 | 0.010683 | -0.41566 | Mthfd2l  |
| 62588 | -1.22135 | 10.4043  | -4.69189 | 0.000233 | 0.006897 | 0.693591 | Nap1l4   |
| 38363 | -1.22142 | 11.1262  | -3.51504 | 0.002801 | 0.019575 | -1.6768  | Itpa     |
| 5146  | -1.22181 | 12.09667 | -5.15018 | 9.12E-05 | 0.005319 | 1.590726 | Rilp     |
| 15095 | -1.22206 | 9.007806 | -4.4429  | 0.000392 | 0.00837  | 0.197476 | Slc19a2  |
| 25811 | -1.2222  | 9.824271 | -3.70318 | 0.001876 | 0.015731 | -1.2964  | Arid1a   |
| 37585 | -1.22248 | 14.32597 | -5.15105 | 9.11E-05 | 0.005319 | 1.592407 | Phyh     |
| 18216 | -1.22297 | 10.50836 | -5.06004 | 0.00011  | 0.005572 | 1.416124 | Pecr     |

|       |          |          |          |          |          |          |         |
|-------|----------|----------|----------|----------|----------|----------|---------|
| 9608  | -1.22302 | 9.675833 | -4.19737 | 0.000657 | 0.010204 | -0.29617 | Krr1    |
| 27259 | -1.2233  | 14.07253 | -4.39543 | 0.000433 | 0.00873  | 0.102348 | Mrfap1  |
| 26515 | -1.2235  | 8.546034 | -4.65969 | 0.000249 | 0.007065 | 0.62974  | Cox15   |
| 2051  | -1.22364 | 10.36782 | -4.85535 | 0.000166 | 0.006078 | 1.016182 | Adck1   |
| 25610 | -1.22367 | 15.5725  | -5.85331 | 2.27E-05 | 0.003204 | 2.915937 | Cyc1    |
| 21655 | -1.22388 | 12.89913 | -4.59722 | 0.000284 | 0.007333 | 0.505589 | Nudt9   |
| 32366 | -1.22389 | 12.7563  | -6.43824 | 7.48E-06 | 0.002382 | 3.963754 | Adck3   |
| 59903 | -1.22399 | 10.2685  | -4.70604 | 0.000227 | 0.006827 | 0.721622 | Acvr2b  |
| 61111 | -1.22421 | 10.31041 | -4.84891 | 0.000169 | 0.006115 | 1.003535 | Cct3    |
| 53455 | -1.22441 | 11.23352 | -3.9273  | 0.001164 | 0.012845 | -0.84235 | Gata6   |
| 14917 | -1.22472 | 10.36151 | -4.88058 | 0.000158 | 0.005925 | 1.065736 | Ndufaf3 |
| 53673 | -1.22516 | 10.83755 | -3.93125 | 0.001155 | 0.012818 | -0.83435 | Zfp943  |
| 12245 | -1.22524 | 12.06624 | -3.7161  | 0.001825 | 0.015558 | -1.27025 | Txndc15 |
| 56424 | -1.2254  | 10.81247 | -3.98048 | 0.00104  | 0.012268 | -0.73465 | Cdc14b  |
| 14085 | -1.2255  | 12.44662 | -2.90788 | 0.01012  | 0.040653 | -2.88411 | Slc38a2 |
| 27582 | -1.22551 | 14.42231 | -4.89832 | 0.000152 | 0.005922 | 1.100528 | Rps15a  |
| 4587  | -1.22572 | 12.55341 | -4.31215 | 0.000516 | 0.009357 | -0.06494 | Dlat    |
| 46264 | -1.22576 | 11.15328 | -4.35788 | 0.000468 | 0.009046 | 0.026962 | Ublcp1  |
| 16633 | -1.22577 | 12.55118 | -4.03466 | 0.000927 | 0.011716 | -0.62497 | Clasp1  |
| 40259 | -1.22637 | 11.78968 | -4.32346 | 0.000504 | 0.009325 | -0.04219 | Mff     |
| 58319 | -1.22643 | 11.21706 | -3.83729 | 0.00141  | 0.013936 | -1.02472 | Khdrbs3 |
| 33145 | -1.22647 | 12.39219 | -3.77282 | 0.001618 | 0.014799 | -1.15535 | Tardbp  |
| 10802 | -1.22709 | 11.25568 | -4.18047 | 0.000681 | 0.010327 | -0.33026 | Gtpbp5  |
| 58619 | -1.22746 | 10.58169 | -3.75233 | 0.00169  | 0.015038 | -1.19685 | Ing4    |
| 27025 | -1.2285  | 8.728327 | -4.88308 | 0.000157 | 0.005925 | 1.070639 | Mett5d1 |
| 35924 | -1.22862 | 12.4028  | -4.63236 | 0.000264 | 0.007219 | 0.575468 | Deb1    |

|       |          |          |          |          |          |          |          |
|-------|----------|----------|----------|----------|----------|----------|----------|
| 28092 | -1.22885 | 8.561885 | -4.23852 | 0.000602 | 0.009996 | -0.21318 | Zfp82    |
| 62671 | -1.22895 | 15.77381 | -6.07583 | 1.48E-05 | 0.002865 | 3.320662 | Cycs     |
| 55997 | -1.22898 | 11.95896 | -3.8041  | 0.001513 | 0.014414 | -1.09198 | Pgs1     |
| 57617 | -1.2291  | 9.701585 | -3.80873 | 0.001499 | 0.014345 | -1.08258 | Dnajc24  |
| 50333 | -1.22985 | 7.977195 | -3.67699 | 0.001984 | 0.01626  | -1.34943 | Gprasp2  |
| 7829  | -1.23004 | 8.827308 | -4.48341 | 0.00036  | 0.008021 | 0.278537 | Zfp30    |
| 13774 | -1.23009 | 10.06962 | -4.25552 | 0.000581 | 0.009799 | -0.17894 | Mcart1   |
| 48423 | -1.2302  | 11.77426 | -4.31344 | 0.000514 | 0.009346 | -0.06234 | Rfwd2    |
| 11331 | -1.23039 | 9.388392 | -4.0645  | 0.00087  | 0.011417 | -0.56459 | Xpo1     |
| 56688 | -1.23049 | 9.907091 | -3.95283 | 0.001103 | 0.01252  | -0.79064 | Med30    |
| 22082 | -1.2306  | 9.099645 | -4.41839 | 0.000413 | 0.008563 | 0.148385 | Rdh5     |
| 25323 | -1.23073 | 12.30726 | -4.59882 | 0.000283 | 0.007333 | 0.508763 | Mat2b    |
| 7656  | -1.23085 | 10.05939 | -3.47682 | 0.003039 | 0.020389 | -1.75387 | Cdc42ep3 |
| 47890 | -1.23151 | 9.810174 | -4.81897 | 0.000179 | 0.006189 | 0.94462  | Lsm14b   |
| 57664 | -1.23151 | 12.96021 | -4.16232 | 0.000707 | 0.010472 | -0.3669  | Cxx1c    |
| 14640 | -1.23155 | 11.26888 | -3.87372 | 0.001305 | 0.013449 | -0.95089 | Thbd     |
| 9747  | -1.2316  | 11.23947 | -4.12082 | 0.000772 | 0.010864 | -0.45074 | Pigo     |
| 28611 | -1.23203 | 10.29792 | -4.1723  | 0.000693 | 0.010378 | -0.34675 | Rreb1    |
| 41672 | -1.23214 | 12.6419  | -3.34941 | 0.003985 | 0.023383 | -2.01011 | Lamb1    |
| 33294 | -1.23221 | 10.18053 | -4.75069 | 0.000207 | 0.006636 | 0.80995  | Med31    |
| 59266 | -1.2327  | 10.8312  | -3.39299 | 0.003632 | 0.022318 | -1.92261 | Trappc6b |
| 29745 | -1.23272 | 12.35213 | -4.03149 | 0.000933 | 0.011731 | -0.63139 | Mlf2     |
| 36862 | -1.23289 | 10.87359 | -4.5126  | 0.000339 | 0.007886 | 0.336876 | Slc25a19 |
| 24320 | -1.23386 | 11.70612 | -4.06791 | 0.000864 | 0.011395 | -0.55769 | Syvn1    |
| 19541 | -1.23409 | 11.26572 | -4.21234 | 0.000637 | 0.0101   | -0.26596 | Rgs3     |
| 13558 | -1.23439 | 11.31012 | -3.97453 | 0.001053 | 0.012334 | -0.74668 | Pgam5    |

|       |          |          |          |          |          |          |          |
|-------|----------|----------|----------|----------|----------|----------|----------|
| 41395 | -1.23444 | 9.86904  | -3.99695 | 0.001004 | 0.012068 | -0.70129 | Golph3l  |
| 21332 | -1.23506 | 8.134153 | -4.99288 | 0.000126 | 0.005707 | 1.285435 | Plxnb1   |
| 31837 | -1.23514 | 10.56155 | -3.89868 | 0.001238 | 0.013202 | -0.90033 | Adnp     |
| 26833 | -1.23528 | 11.64383 | -4.40513 | 0.000424 | 0.008651 | 0.121798 | Ccdc58   |
| 60196 | -1.23545 | 10.71419 | -4.90092 | 0.000152 | 0.005922 | 1.105639 | Tmem14c  |
| 19633 | -1.23571 | 9.685445 | -4.0351  | 0.000926 | 0.011716 | -0.62408 | Plekhb2  |
| 51368 | -1.23589 | 9.555357 | -4.99702 | 0.000125 | 0.005707 | 1.293502 | Ric8b    |
| 29614 | -1.23591 | 11.54425 | -3.75389 | 0.001684 | 0.015038 | -1.1937  | Vezf1    |
| 38676 | -1.23593 | 8.683295 | -4.35266 | 0.000474 | 0.009093 | 0.016486 | Acrbp    |
| 25272 | -1.23602 | 10.78305 | -5.4674  | 4.83E-05 | 0.004208 | 2.196954 | Get4     |
| 56485 | -1.23622 | 12.14288 | -3.81732 | 0.001471 | 0.014231 | -1.06519 | Ssr3     |
| 45564 | -1.23661 | 12.45469 | -5.06579 | 0.000108 | 0.005562 | 1.42729  | H2-Ke6   |
| 60886 | -1.23671 | 12.84573 | -4.32351 | 0.000504 | 0.009325 | -0.0421  | Mpp6     |
| 56153 | -1.23704 | 10.20745 | -4.34011 | 0.000486 | 0.009137 | -0.00872 | Cdkal1   |
| 62443 | -1.23719 | 11.71893 | -4.31994 | 0.000507 | 0.009336 | -0.04928 | Naprt1   |
| 2894  | -1.23749 | 9.626113 | -4.82036 | 0.000179 | 0.006189 | 0.947366 | Dusp28   |
| 4520  | -1.23786 | 8.112787 | -4.64011 | 0.00026  | 0.007218 | 0.590863 | Dcaf12l1 |
| 41671 | -1.238   | 8.567623 | -4.13367 | 0.000752 | 0.010741 | -0.42476 | Asb4     |
| 7008  | -1.23805 | 11.68786 | -4.7134  | 0.000223 | 0.006803 | 0.736192 | Nudt8    |
| 10495 | -1.2383  | 10.53843 | -3.51043 | 0.002829 | 0.019655 | -1.68609 | Epdr1    |
| 57714 | -1.23837 | 11.46825 | -4.75162 | 0.000206 | 0.006636 | 0.811779 | Sirt5    |
| 31235 | -1.2386  | 15.65057 | -6.17526 | 1.22E-05 | 0.002798 | 3.499096 | Sod2     |
| 13529 | -1.23871 | 11.31231 | -3.8455  | 0.001386 | 0.013862 | -1.00809 | Alkbh5   |
| 47235 | -1.23925 | 11.79447 | -4.20817 | 0.000642 | 0.010117 | -0.27438 | Strn3    |
| 34372 | -1.23929 | 10.83939 | -4.0932  | 0.000819 | 0.011164 | -0.50656 | Gba2     |
| 36850 | -1.23951 | 10.71145 | -4.43082 | 0.000402 | 0.00847  | 0.173274 | Klhl21   |



|       |          |          |          |          |          |          |               |
|-------|----------|----------|----------|----------|----------|----------|---------------|
| 33937 | -1.23952 | 14.0593  | -4.19027 | 0.000667 | 0.010268 | -0.31048 | B230118H07Rik |
| 18257 | -1.24005 | 9.230231 | -4.31128 | 0.000517 | 0.009357 | -0.06669 | Pppde1        |
| 19555 | -1.24019 | 11.71542 | -3.87939 | 0.001289 | 0.013363 | -0.93941 | Tmbim4        |
| 230   | -1.24059 | 9.320516 | -4.90715 | 0.00015  | 0.005914 | 1.117842 | Pknnox2       |
| 49988 | -1.24106 | 9.491673 | -4.88688 | 0.000156 | 0.005925 | 1.078108 | Inpp5e        |
| 22753 | -1.24142 | 11.83243 | -3.97068 | 0.001062 | 0.012344 | -0.75447 | LOC100039181  |
| 11866 | -1.24154 | 11.58166 | -4.05121 | 0.000895 | 0.011496 | -0.59147 | Tnk2          |
| 5710  | -1.24188 | 9.371504 | -3.84686 | 0.001382 | 0.013848 | -1.00534 | Cse11         |
| 3356  | -1.24199 | 9.338814 | -3.92948 | 0.001159 | 0.012818 | -0.83794 | Slu7          |
| 38545 | -1.24221 | 8.4587   | -4.55393 | 0.000311 | 0.007593 | 0.419351 | Zfp84         |
| 36433 | -1.24254 | 8.99623  | -4.72757 | 0.000217 | 0.006719 | 0.764242 | Dok2          |
| 8497  | -1.24255 | 10.57861 | -3.7471  | 0.001709 | 0.015117 | -1.20744 | Tjp1          |
| 54728 | -1.24257 | 11.03748 | -5.0307  | 0.000116 | 0.005645 | 1.359091 | Trpt1         |
| 6816  | -1.24261 | 11.66986 | -3.95582 | 0.001096 | 0.012502 | -0.78457 | Ank2          |
| 53280 | -1.24265 | 12.5892  | -4.5719  | 0.000299 | 0.007478 | 0.455157 | Dctn6         |
| 62570 | -1.24299 | 8.914672 | -4.3752  | 0.000452 | 0.008944 | 0.061748 | Trim13        |
| 41829 | -1.24306 | 12.51891 | -5.01842 | 0.000119 | 0.005671 | 1.335195 | Lrpprc        |
| 25291 | -1.24328 | 13.12368 | -3.98353 | 0.001033 | 0.012238 | -0.72847 | Gtf2i         |
| 15911 | -1.24338 | 8.857303 | -4.90788 | 0.000149 | 0.005914 | 1.119269 | Ccdc64        |
| 5091  | -1.24374 | 11.10124 | -4.76066 | 0.000202 | 0.006587 | 0.829646 | Plcd1         |
| 30891 | -1.2439  | 9.314821 | -4.52975 | 0.000327 | 0.007724 | 0.371116 | Hiat1         |
| 13192 | -1.24408 | 9.854107 | -4.13268 | 0.000753 | 0.010744 | -0.42676 | Rblcc1        |
| 23124 | -1.24417 | 9.552189 | -3.04413 | 0.007604 | 0.03406  | -2.61739 | Scrn1         |
| 39192 | -1.24426 | 10.36837 | -4.71332 | 0.000223 | 0.006803 | 0.736035 | Mrpl46        |
| 23401 | -1.24428 | 10.00935 | -3.98923 | 0.001021 | 0.012136 | -0.71692 | Smad3         |
| 33467 | -1.24457 | 11.3209  | -3.99545 | 0.001008 | 0.012068 | -0.70434 | Chtf8         |

|       |          |          |          |          |          |          |              |
|-------|----------|----------|----------|----------|----------|----------|--------------|
| 11062 | -1.24463 | 11.26161 | -3.94265 | 0.001127 | 0.012635 | -0.81124 | Gstm5        |
| 7026  | -1.24482 | 10.64222 | -4.2624  | 0.000573 | 0.009725 | -0.16506 | Osbp11a      |
| 41241 | -1.24485 | 11.09695 | -3.81275 | 0.001486 | 0.014299 | -1.07445 | Eya3         |
| 21522 | -1.24501 | 12.08829 | -4.5975  | 0.000284 | 0.007333 | 0.506138 | Mrpl27       |
| 33807 | -1.24544 | 12.64454 | -4.94445 | 0.000139 | 0.005859 | 1.190864 | Tmed1        |
| 6806  | -1.24559 | 11.29436 | -3.4907  | 0.00295  | 0.020009 | -1.72589 | Lamp3        |
| 60143 | -1.24589 | 11.29316 | -3.61368 | 0.00227  | 0.017417 | -1.47752 | Yipf4        |
| 32752 | -1.24618 | 9.856606 | -4.86249 | 0.000164 | 0.006056 | 1.030212 | Hars2        |
| 35192 | -1.24622 | 13.14499 | -5.08016 | 0.000105 | 0.005504 | 1.455195 | Fam165b      |
| 52413 | -1.24626 | 11.06394 | -3.75185 | 0.001691 | 0.015038 | -1.19783 | Acvr1        |
| 36059 | -1.24645 | 8.360229 | -4.2247  | 0.00062  | 0.010087 | -0.24104 | Slc22a23     |
| 51004 | -1.24657 | 11.82679 | -3.71884 | 0.001815 | 0.015538 | -1.26469 | St13         |
| 16486 | -1.24665 | 14.48181 | -4.1711  | 0.000694 | 0.010391 | -0.34917 | Rpl23a       |
| 51020 | -1.24711 | 11.31135 | -4.51458 | 0.000337 | 0.007877 | 0.340825 | Hist1h2bm    |
| 56324 | -1.24712 | 9.664511 | -3.85286 | 0.001364 | 0.013751 | -0.99317 | Cops8        |
| 29937 | -1.24731 | 10.51917 | -3.85322 | 0.001363 | 0.013751 | -0.99245 | Smc3         |
| 9285  | -1.24798 | 10.28136 | -4.43799 | 0.000396 | 0.008424 | 0.187649 | Art5         |
| 5138  | -1.24805 | 10.98337 | -5.04648 | 0.000113 | 0.005602 | 1.389787 | Ttc35        |
| 37256 | -1.2487  | 10.79043 | -4.48264 | 0.000361 | 0.008021 | 0.277    | Ppapdc3      |
| 10709 | -1.24882 | 9.017724 | -4.41885 | 0.000412 | 0.008563 | 0.149296 | Ogt          |
| 16132 | -1.24889 | 12.67243 | -4.39395 | 0.000434 | 0.008749 | 0.099373 | Sra1         |
| 5749  | -1.24925 | 11.57609 | -4.32491 | 0.000502 | 0.009325 | -0.03929 | Sik3         |
| 12402 | -1.24931 | 7.458763 | -4.73469 | 0.000214 | 0.006665 | 0.77831  | Gpr22        |
| 16170 | -1.24939 | 10.53587 | -3.69181 | 0.001922 | 0.015958 | -1.31944 | LOC100504289 |
| 22469 | -1.24943 | 11.10259 | -4.60821 | 0.000278 | 0.007325 | 0.527453 | Cox11        |
| 3978  | -1.24952 | 8.342658 | -4.63168 | 0.000264 | 0.007219 | 0.574109 | Plekhb1      |

|       |          |          |          |          |          |          |               |
|-------|----------|----------|----------|----------|----------|----------|---------------|
| 58288 | -1.24997 | 10.99439 | -4.61296 | 0.000275 | 0.007306 | 0.536903 | Rnfl66        |
| 337   | -1.25028 | 11.81095 | -4.71366 | 0.000223 | 0.006803 | 0.7367   | Grb14         |
| 43979 | -1.25061 | 10.32513 | -3.97127 | 0.001061 | 0.012341 | -0.75328 | Rchyl         |
| 51597 | -1.25103 | 10.41415 | -4.55737 | 0.000309 | 0.007581 | 0.42621  | Mmachc        |
| 33492 | -1.25112 | 12.34383 | -4.73529 | 0.000213 | 0.006665 | 0.779504 | Phtf2         |
| 24960 | -1.25128 | 9.060453 | -4.8882  | 0.000156 | 0.005925 | 1.080694 | Zdhhc13       |
| 27342 | -1.25155 | 11.28636 | -4.4852  | 0.000359 | 0.008021 | 0.282124 | Gm5617        |
| 11219 | -1.25175 | 9.675071 | -3.92781 | 0.001163 | 0.012845 | -0.84131 | Ubfd1         |
| 37478 | -1.25192 | 12.60828 | -3.95851 | 0.00109  | 0.012479 | -0.77913 | Fundc2        |
| 40531 | -1.25236 | 11.29767 | -4.80144 | 0.000186 | 0.006267 | 0.91009  | Tcp1112       |
| 15602 | -1.25252 | 12.13558 | -5.05493 | 0.000111 | 0.005572 | 1.406198 | Pomgnt1       |
| 24440 | -1.25258 | 8.390294 | -5.2365  | 7.66E-05 | 0.004951 | 1.756973 | Gab1          |
| 19799 | -1.25319 | 8.888651 | -4.95899 | 0.000135 | 0.005828 | 1.219279 | Kcnip3        |
| 1203  | -1.25327 | 12.11114 | -4.34194 | 0.000484 | 0.009132 | -0.00506 | Ssbp1         |
| 21030 | -1.25337 | 11.99504 | -4.04447 | 0.000908 | 0.011594 | -0.60512 | Ptgr2         |
| 11694 | -1.25351 | 9.167662 | -3.46494 | 0.003117 | 0.020606 | -1.77781 | Cyp4b1        |
| 29397 | -1.25353 | 12.35566 | -5.03521 | 0.000115 | 0.005645 | 1.367865 | Mrpl22        |
| 8100  | -1.25357 | 9.562758 | -4.59116 | 0.000288 | 0.007378 | 0.493526 | Capn7         |
| 19613 | -1.25379 | 12.5574  | -3.79118 | 0.001556 | 0.014594 | -1.11814 | Xbp1          |
| 22797 | -1.25453 | 8.390465 | -4.40325 | 0.000426 | 0.008651 | 0.118027 | Rasl10a       |
| 57111 | -1.25461 | 8.701208 | -5.01687 | 0.00012  | 0.005671 | 1.332183 | Fbxl5         |
| 24897 | -1.25463 | 10.47007 | -3.99917 | 0.001    | 0.012047 | -0.6968  | Smyd1         |
| 47232 | -1.25508 | 8.843298 | -4.32774 | 0.000499 | 0.009314 | -0.0336  | C430048L16Rik |
| 24737 | -1.25522 | 13.64736 | -4.62881 | 0.000266 | 0.007229 | 0.568414 | Gm6238        |
| 41294 | -1.25532 | 9.588675 | -4.76358 | 0.000201 | 0.006567 | 0.835409 | Mettl5        |
| 18881 | -1.25533 | 9.64914  | -3.9779  | 0.001046 | 0.012301 | -0.73986 | Vbp1          |

|       |          |          |          |          |          |          |              |
|-------|----------|----------|----------|----------|----------|----------|--------------|
| 12872 | -1.25546 | 11.60704 | -3.86767 | 0.001322 | 0.013506 | -0.96316 | Hmgn2        |
| 33247 | -1.25549 | 9.727635 | -3.51203 | 0.002819 | 0.019626 | -1.68287 | Gm3014       |
| 60427 | -1.25565 | 11.56116 | -3.90591 | 0.001219 | 0.01314  | -0.88567 | Med8         |
| 17802 | -1.25567 | 11.67895 | -3.5977  | 0.002349 | 0.017719 | -1.50983 | Tmco1        |
| 16060 | -1.25611 | 7.788371 | -4.17461 | 0.000689 | 0.010365 | -0.34209 | Ddc          |
| 49478 | -1.25632 | 11.22423 | -3.97327 | 0.001056 | 0.012341 | -0.74923 | Abl1         |
| 17071 | -1.25633 | 9.232458 | -5.19297 | 8.37E-05 | 0.005108 | 1.673243 | Psmb2        |
| 49740 | -1.25645 | 10.98082 | -4.25436 | 0.000583 | 0.009815 | -0.18127 | Dgcr2        |
| 20860 | -1.25667 | 8.616793 | -4.30378 | 0.000525 | 0.009438 | -0.08179 | Ttc21b       |
| 4081  | -1.25682 | 14.57044 | -4.10545 | 0.000798 | 0.011061 | -0.4818  | Gng5         |
| 60876 | -1.25708 | 12.33945 | -4.05926 | 0.00088  | 0.011455 | -0.57519 | Gm10094      |
| 48075 | -1.2571  | 11.80169 | -4.86346 | 0.000164 | 0.006054 | 1.032117 | Gm12693      |
| 30810 | -1.25725 | 12.8939  | -3.96548 | 0.001074 | 0.012389 | -0.76501 | Dnaja3       |
| 5264  | -1.25778 | 11.81011 | -4.86595 | 0.000163 | 0.006036 | 1.037012 | Rhot1        |
| 15877 | -1.25782 | 11.31608 | -4.26074 | 0.000575 | 0.00974  | -0.16842 | LOC100134990 |
| 50307 | -1.25793 | 11.28451 | -4.28532 | 0.000546 | 0.009554 | -0.11892 | Adipor1      |
| 48086 | -1.2581  | 13.91626 | -6.1603  | 1.26E-05 | 0.002798 | 3.472353 | Dlst         |
| 36454 | -1.2587  | 12.05794 | -4.09391 | 0.000818 | 0.011164 | -0.50512 | Psmb1        |
| 44067 | -1.25875 | 12.88354 | -4.19354 | 0.000662 | 0.010247 | -0.3039  | Mrpl3        |
| 51876 | -1.25878 | 8.743366 | -4.79878 | 0.000187 | 0.006267 | 0.904847 | Dut          |
| 23437 | -1.25923 | 12.46326 | -3.99159 | 0.001016 | 0.012109 | -0.71214 | Josd1        |
| 15958 | -1.26009 | 12.30219 | -3.98199 | 0.001037 | 0.012257 | -0.73159 | Ak3          |
| 52652 | -1.26009 | 15.08143 | -3.12458 | 0.006417 | 0.0308   | -2.4585  | Hbb-b1       |
| 31880 | -1.26024 | 10.75503 | -4.50488 | 0.000344 | 0.007904 | 0.321454 | Fam118b      |
| 44343 | -1.26092 | 12.31054 | -5.07674 | 0.000106 | 0.005504 | 1.448556 | Hint3        |
| 14172 | -1.26141 | 14.2852  | -4.63926 | 0.00026  | 0.007218 | 0.589175 | Sdha         |

|       |          |          |          |          |          |          |              |
|-------|----------|----------|----------|----------|----------|----------|--------------|
| 6673  | -1.26155 | 12.50005 | -3.75127 | 0.001694 | 0.015044 | -1.199   | Cct2         |
| 3020  | -1.26197 | 10.1576  | -4.55803 | 0.000308 | 0.007581 | 0.427526 | LOC100503238 |
| 56531 | -1.26201 | 12.43388 | -4.37671 | 0.00045  | 0.008933 | 0.064767 | Echdc2       |
| 31479 | -1.26225 | 11.8289  | -3.61865 | 0.002246 | 0.017305 | -1.46746 | Tfpi         |
| 31311 | -1.26228 | 12.58572 | -4.29625 | 0.000533 | 0.009487 | -0.09692 | Tmem85       |
| 59996 | -1.26316 | 12.09094 | -3.65659 | 0.002072 | 0.016636 | -1.39073 | Ptplad1      |
| 4598  | -1.26352 | 11.64903 | -3.77766 | 0.001601 | 0.014716 | -1.14555 | Prr14        |
| 28967 | -1.26361 | 11.50769 | -4.14634 | 0.000732 | 0.010607 | -0.39917 | Pcnp         |
| 60027 | -1.26446 | 13.97061 | -6.34613 | 8.88E-06 | 0.002463 | 3.802227 | Bckdha       |
| 61104 | -1.26464 | 10.14952 | -4.63538 | 0.000262 | 0.007219 | 0.581458 | Mpped2       |
| 49210 | -1.26477 | 9.604066 | -4.73156 | 0.000215 | 0.006689 | 0.772119 | Lsm1         |
| 55798 | -1.26499 | 12.63272 | -4.01311 | 0.00097  | 0.011955 | -0.66858 | Ogn          |
| 59934 | -1.26502 | 10.34684 | -4.65306 | 0.000253 | 0.007106 | 0.616583 | Zfp68        |
| 58302 | -1.26504 | 10.59209 | -4.31158 | 0.000516 | 0.009357 | -0.06609 | Coq5         |
| 52252 | -1.26512 | 9.703424 | -3.98039 | 0.00104  | 0.012268 | -0.73482 | Actr6        |
| 4712  | -1.26547 | 12.55751 | -4.26054 | 0.000575 | 0.00974  | -0.16881 | Hsd17b4      |
| 14943 | -1.26567 | 10.44011 | -4.03923 | 0.000918 | 0.011676 | -0.61571 | Stmn1        |
| 9649  | -1.26587 | 11.34979 | -4.17604 | 0.000687 | 0.010365 | -0.33921 | Gm10731      |
| 61534 | -1.26626 | 12.38163 | -5.39397 | 5.59E-05 | 0.004397 | 2.057786 | Snapin       |
| 9061  | -1.26649 | 11.67269 | -4.79916 | 0.000187 | 0.006267 | 0.905595 | Sgcb         |
| 60445 | -1.26673 | 10.45283 | -3.87023 | 0.001315 | 0.013488 | -0.95798 | Cdk5rap1     |
| 50615 | -1.26675 | 11.66382 | -4.25007 | 0.000588 | 0.009882 | -0.18991 | Npepps       |
| 33619 | -1.26683 | 12.60112 | -4.35673 | 0.00047  | 0.009047 | 0.024664 | Rbm5         |
| 26490 | -1.26683 | 12.01038 | -3.78626 | 0.001572 | 0.014645 | -1.12811 | Hax1         |
| 31704 | -1.26789 | 12.38294 | -4.79783 | 0.000187 | 0.006267 | 0.902983 | Wnk2         |
| 11095 | -1.2679  | 8.969765 | -4.48468 | 0.000359 | 0.008021 | 0.281076 | Pigv         |

|       |          |          |          |          |          |          |          |
|-------|----------|----------|----------|----------|----------|----------|----------|
| 31989 | -1.2679  | 9.42029  | -4.20844 | 0.000642 | 0.010117 | -0.27384 | Lgi4     |
| 28906 | -1.26794 | 11.27695 | -4.31205 | 0.000516 | 0.009357 | -0.06515 | Eif2s1   |
| 38866 | -1.26807 | 11.35702 | -3.71352 | 0.001835 | 0.015584 | -1.27547 | Ncoa4    |
| 29263 | -1.26819 | 14.28472 | -4.9919  | 0.000126 | 0.005707 | 1.283525 | Gm5451   |
| 25040 | -1.26836 | 8.812493 | -4.84566 | 0.00017  | 0.006133 | 0.997142 | D2hgdh   |
| 14451 | -1.26872 | 11.46213 | -4.39976 | 0.000429 | 0.008694 | 0.111014 | Cct4     |
| 47946 | -1.26895 | 13.274   | -5.08506 | 0.000104 | 0.005504 | 1.464684 | Chchd7   |
| 54180 | -1.26908 | 12.47538 | -4.07579 | 0.00085  | 0.011306 | -0.54175 | Ubac1    |
| 59162 | -1.26913 | 10.21797 | -4.00074 | 0.000996 | 0.012046 | -0.69362 | Banfl    |
| 1719  | -1.26941 | 11.94555 | -4.32494 | 0.000502 | 0.009325 | -0.03922 | Ndufaf4  |
| 51602 | -1.26942 | 9.07863  | -4.78859 | 0.000191 | 0.006332 | 0.884756 | Capn3    |
| 46620 | -1.26969 | 10.01337 | -5.07464 | 0.000106 | 0.005514 | 1.444477 | AI316807 |
| 39131 | -1.2699  | 9.407345 | -3.88119 | 0.001284 | 0.013363 | -0.93576 | Gprasp1  |
| 24179 | -1.27    | 11.25502 | -4.83331 | 0.000174 | 0.006133 | 0.972857 | Ipo13    |
| 22568 | -1.27015 | 9.815766 | -4.10047 | 0.000806 | 0.011101 | -0.49186 | Tmem41a  |
| 52478 | -1.27048 | 11.81711 | -3.60117 | 0.002332 | 0.017655 | -1.50283 | Sh3bp5l  |
| 12080 | -1.2708  | 11.41329 | -4.36421 | 0.000462 | 0.008977 | 0.03968  | Cacna2d1 |
| 952   | -1.2709  | 9.118648 | -4.61964 | 0.000271 | 0.007258 | 0.55019  | Kifc2    |
| 32520 | -1.27106 | 10.64882 | -5.49172 | 4.60E-05 | 0.004091 | 2.242882 | Pitrm1   |
| 11477 | -1.27112 | 12.76443 | -3.75319 | 0.001687 | 0.015038 | -1.19512 | Cnbp     |
| 51570 | -1.27152 | 12.48597 | -4.80383 | 0.000185 | 0.006267 | 0.914803 | Cpeb3    |
| 57071 | -1.27158 | 11.07125 | -4.29108 | 0.000539 | 0.009544 | -0.10733 | Gm6578   |
| 43162 | -1.27204 | 11.81126 | -4.6081  | 0.000278 | 0.007325 | 0.527234 | Osgep    |
| 36897 | -1.27241 | 11.19566 | -4.31894 | 0.000508 | 0.009336 | -0.05128 | Zfp637   |
| 28040 | -1.27241 | 11.08021 | -3.31296 | 0.004306 | 0.024473 | -2.08317 | Hsph1    |
| 27689 | -1.27248 | 12.54683 | -4.26415 | 0.000571 | 0.009719 | -0.16154 | Nfyc     |

|       |          |          |          |          |          |          |          |
|-------|----------|----------|----------|----------|----------|----------|----------|
| 10861 | -1.27266 | 11.42177 | -4.53171 | 0.000326 | 0.007714 | 0.375028 | Taf6     |
| 44794 | -1.27327 | 8.349893 | -5.53713 | 4.21E-05 | 0.00398  | 2.328419 | Ccdc46   |
| 34158 | -1.27379 | 9.282167 | -3.93709 | 0.00114  | 0.012753 | -0.82252 | Pde6d    |
| 18813 | -1.27412 | 10.06137 | -4.5805  | 0.000294 | 0.007457 | 0.472305 | Yars2    |
| 13297 | -1.27421 | 8.801099 | -5.59834 | 3.73E-05 | 0.0039   | 2.443265 | Lphn1    |
| 19574 | -1.27457 | 11.00393 | -3.75198 | 0.001691 | 0.015038 | -1.19757 | Ccdc53   |
| 54144 | -1.27495 | 11.63924 | -4.04308 | 0.000911 | 0.011608 | -0.60793 | Btg3     |
| 58983 | -1.27551 | 10.47277 | -4.53778 | 0.000321 | 0.007678 | 0.38714  | Tmem60   |
| 16283 | -1.27592 | 13.6024  | -4.76645 | 0.0002   | 0.006541 | 0.841064 | Vldlr    |
| 62516 | -1.27608 | 10.73366 | -4.37406 | 0.000453 | 0.008944 | 0.059465 | Klhdc2   |
| 32010 | -1.2763  | 11.0151  | -3.70078 | 0.001886 | 0.015769 | -1.30126 | Abat     |
| 30131 | -1.27666 | 9.376502 | -4.1503  | 0.000726 | 0.010601 | -0.39118 | Rem1     |
| 31170 | -1.27668 | 11.18904 | -3.79192 | 0.001553 | 0.01459  | -1.11664 | Pygo2    |
| 48872 | -1.27706 | 11.35241 | -3.68111 | 0.001967 | 0.01616  | -1.34108 | Srp9     |
| 23165 | -1.27738 | 12.02886 | -4.31777 | 0.00051  | 0.009337 | -0.05365 | Fam73b   |
| 56516 | -1.27827 | 11.93727 | -3.97623 | 0.00105  | 0.012323 | -0.74325 | Rnaseh2c |
| 37119 | -1.27842 | 13.70379 | -4.80099 | 0.000186 | 0.006267 | 0.909208 | Grcc10   |
| 21164 | -1.27843 | 11.6731  | -4.15193 | 0.000723 | 0.010601 | -0.38787 | Lrrfip1  |
| 10237 | -1.27852 | 12.18536 | -4.0053  | 0.000987 | 0.01201  | -0.68438 | Asph     |
| 42508 | -1.27872 | 11.90064 | -4.31856 | 0.000509 | 0.009336 | -0.05206 | Nt5c3    |
| 47636 | -1.27882 | 11.33892 | -4.99639 | 0.000125 | 0.005707 | 1.292276 | Gchfr    |
| 41910 | -1.27882 | 10.00369 | -4.238   | 0.000603 | 0.009999 | -0.21424 | Rarb     |
| 59312 | -1.27916 | 9.124584 | -4.41527 | 0.000415 | 0.008578 | 0.142115 | Lypla1   |
| 21971 | -1.2796  | 11.2837  | -3.66924 | 0.002017 | 0.016395 | -1.36512 | Siva1    |
| 62085 | -1.27963 | 10.77649 | -3.0965  | 0.006809 | 0.031943 | -2.51408 | Fam102a  |
| 59667 | -1.28005 | 9.923839 | -4.62898 | 0.000266 | 0.007229 | 0.568747 | Gm826    |

|       |          |          |          |          |          |          |          |
|-------|----------|----------|----------|----------|----------|----------|----------|
| 54533 | -1.28013 | 10.30666 | -4.10395 | 0.0008   | 0.011075 | -0.48483 | Ubl3     |
| 2870  | -1.28045 | 11.96463 | -4.09928 | 0.000808 | 0.011101 | -0.49426 | Eif5a    |
| 59938 | -1.28095 | 12.89326 | -4.4076  | 0.000422 | 0.008651 | 0.126744 | Stard7   |
| 26108 | -1.28115 | 10.30175 | -4.52233 | 0.000332 | 0.007808 | 0.356302 | Lactb    |
| 42963 | -1.28121 | 9.914723 | -3.85989 | 0.001344 | 0.013644 | -0.97892 | Rabggtb  |
| 39973 | -1.28123 | 11.86197 | -4.2156  | 0.000632 | 0.0101   | -0.2594  | Rilpl1   |
| 50827 | -1.28127 | 12.7549  | -3.82512 | 0.001447 | 0.014131 | -1.04939 | Phldb1   |
| 59195 | -1.28137 | 14.07748 | -4.6937  | 0.000232 | 0.006885 | 0.697171 | Suclg1   |
| 57808 | -1.28148 | 10.21287 | -3.98424 | 0.001032 | 0.012226 | -0.72702 | Meaf6    |
| 26421 | -1.28151 | 10.43555 | -3.8123  | 0.001487 | 0.0143   | -1.07536 | Rarg     |
| 45203 | -1.28236 | 10.60495 | -4.37396 | 0.000453 | 0.008944 | 0.05926  | Zfp187   |
| 50438 | -1.28287 | 12.10332 | -4.12597 | 0.000764 | 0.010788 | -0.44032 | Dctpp1   |
| 38460 | -1.28346 | 12.78495 | -3.76315 | 0.001651 | 0.014908 | -1.17494 | Pkdcc    |
| 51269 | -1.2839  | 11.30255 | -4.60308 | 0.000281 | 0.007327 | 0.517252 | Flcn     |
| 32551 | -1.28398 | 11.24539 | -4.34651 | 0.00048  | 0.009113 | 0.004135 | Eif4g2   |
| 3260  | -1.28423 | 10.46561 | -4.13004 | 0.000757 | 0.010755 | -0.4321  | Pxmp3    |
| 46265 | -1.28444 | 10.02436 | -3.34816 | 0.003996 | 0.023403 | -2.01261 | Enpp2    |
| 42073 | -1.28454 | 11.72042 | -4.66748 | 0.000245 | 0.007001 | 0.645196 | Atxn2    |
| 61545 | -1.28458 | 14.31294 | -4.57744 | 0.000296 | 0.00747  | 0.466201 | Timm8b   |
| 58390 | -1.28521 | 11.86273 | -4.62031 | 0.000271 | 0.007258 | 0.551504 | Cox16    |
| 20659 | -1.28563 | 12.12634 | -4.17359 | 0.000691 | 0.010372 | -0.34416 | Thra     |
| 52255 | -1.28576 | 8.577205 | -5.29361 | 6.83E-05 | 0.004788 | 1.866448 | Dcaf4    |
| 20461 | -1.28587 | 15.10014 | -5.40634 | 5.45E-05 | 0.004397 | 2.08129  | Ndufs1   |
| 28746 | -1.2859  | 8.685663 | -3.54763 | 0.002614 | 0.018768 | -1.61101 | D0H4S114 |
| 50750 | -1.28613 | 11.8328  | -4.06017 | 0.000878 | 0.011455 | -0.57336 | Psmg1    |
| 49142 | -1.28616 | 10.93105 | -5.12782 | 9.55E-05 | 0.005402 | 1.547495 | Scn4b    |



|       |          |          |          |          |          |          |           |
|-------|----------|----------|----------|----------|----------|----------|-----------|
| 48842 | -1.28628 | 12.34209 | -5.05241 | 0.000111 | 0.005572 | 1.401311 | Hmgcl     |
| 54520 | -1.28641 | 12.10346 | -3.95148 | 0.001106 | 0.012525 | -0.79336 | Atp5sl    |
| 4815  | -1.28652 | 10.0648  | -4.91914 | 0.000146 | 0.005905 | 1.14133  | Mrps22    |
| 22749 | -1.28669 | 11.71398 | -4.55467 | 0.00031  | 0.007593 | 0.420834 | Cobl1l    |
| 56642 | -1.28675 | 13.66692 | -4.43273 | 0.0004   | 0.008456 | 0.177114 | Mtch2     |
| 48649 | -1.28687 | 13.8677  | -5.06416 | 0.000109 | 0.005567 | 1.424136 | Pdhb      |
| 56161 | -1.28693 | 11.99544 | -3.97782 | 0.001046 | 0.012301 | -0.74003 | Mettl9    |
| 23581 | -1.28704 | 11.41282 | -4.11725 | 0.000778 | 0.010901 | -0.45795 | Zadh2     |
| 39587 | -1.28775 | 12.261   | -4.37771 | 0.000449 | 0.00893  | 0.066779 | Atp1a2    |
| 15882 | -1.28807 | 14.1796  | -4.7815  | 0.000194 | 0.006401 | 0.870781 | Atp5fl    |
| 14425 | -1.28837 | 12.58354 | -4.00019 | 0.000997 | 0.012046 | -0.69474 | Hist1h2bc |
| 61770 | -1.28843 | 9.673272 | -4.57016 | 0.0003   | 0.00749  | 0.451699 | Mettl3    |
| 58030 | -1.28856 | 11.69734 | -4.61846 | 0.000272 | 0.007267 | 0.547834 | N6amt2    |
| 51683 | -1.28865 | 8.852743 | -6.6434  | 5.13E-06 | 0.002346 | 4.318828 | Wfdc1     |
| 4378  | -1.28909 | 9.899919 | -4.06511 | 0.000869 | 0.011417 | -0.56337 | Bmpr1a    |
| 2668  | -1.28914 | 10.89441 | -5.39512 | 5.58E-05 | 0.004397 | 2.059976 | Pdf       |
| 34857 | -1.28974 | 12.8712  | -3.9589  | 0.001089 | 0.012479 | -0.77834 | Cyb5      |
| 1215  | -1.28978 | 10.89371 | -4.38437 | 0.000443 | 0.008862 | 0.080142 | Kcnq1     |
| 42461 | -1.2899  | 12.05526 | -4.1229  | 0.000769 | 0.01083  | -0.44653 | Pigyl     |
| 59359 | -1.29012 | 8.525561 | -5.26917 | 7.18E-05 | 0.004837 | 1.819646 | Rhbdl3    |
| 19594 | -1.29055 | 11.14463 | -4.34671 | 0.00048  | 0.009113 | 0.004527 | Crybg3    |
| 17864 | -1.29059 | 11.65213 | -4.83303 | 0.000174 | 0.006133 | 0.972297 | Endog     |
| 47802 | -1.29063 | 11.88206 | -3.3582  | 0.003911 | 0.023119 | -1.99247 | Rgs2      |
| 28373 | -1.29073 | 10.60231 | -4.20641 | 0.000645 | 0.010117 | -0.27793 | Cstf2t    |
| 35261 | -1.29084 | 10.07589 | -4.88029 | 0.000158 | 0.005925 | 1.065167 | Arfgef1   |
| 10236 | -1.29101 | 10.39434 | -4.85515 | 0.000167 | 0.006078 | 1.015802 | Cog6      |

|       |          |          |          |          |          |          |              |
|-------|----------|----------|----------|----------|----------|----------|--------------|
| 60978 | -1.29167 | 8.538095 | -3.04917 | 0.007523 | 0.033915 | -2.60748 | Traf4        |
| 38085 | -1.29179 | 11.42721 | -4.40848 | 0.000421 | 0.008645 | 0.128517 | Tcp1         |
| 22727 | -1.29192 | 10.61821 | -4.77118 | 0.000198 | 0.006513 | 0.850413 | Ablim1       |
| 21292 | -1.29206 | 11.6122  | -4.83307 | 0.000174 | 0.006133 | 0.972375 | Clpx         |
| 28525 | -1.2924  | 11.69966 | -4.9026  | 0.000151 | 0.005914 | 1.108914 | Cd59a        |
| 31743 | -1.29251 | 8.621162 | -4.58971 | 0.000288 | 0.007384 | 0.49063  | Bola1        |
| 29617 | -1.29335 | 12.12729 | -4.75883 | 0.000203 | 0.006602 | 0.826034 | Itgb1bp2     |
| 26416 | -1.2937  | 11.01681 | -5.70519 | 3.02E-05 | 0.003713 | 2.642489 | Cbr1         |
| 56252 | -1.29397 | 8.717842 | -4.61542 | 0.000273 | 0.007287 | 0.541788 | Syde2        |
| 38167 | -1.29415 | 12.23428 | -4.34631 | 0.00048  | 0.009113 | 0.003735 | Hist2h2aa1   |
| 4333  | -1.29455 | 12.65316 | -4.21367 | 0.000635 | 0.0101   | -0.26328 | Ddt          |
| 6948  | -1.29486 | 13.48797 | -4.10625 | 0.000797 | 0.011056 | -0.48018 | Phyhd1       |
| 33506 | -1.29503 | 12.42751 | -4.80301 | 0.000185 | 0.006267 | 0.913196 | Rmnd1        |
| 47541 | -1.29505 | 10.71936 | -3.78677 | 0.00157  | 0.014645 | -1.12709 | Fam174a      |
| 32474 | -1.29538 | 12.87218 | -4.67846 | 0.00024  | 0.006956 | 0.66697  | Fblim1       |
| 61274 | -1.29541 | 10.12569 | -4.02879 | 0.000939 | 0.011752 | -0.63684 | Rbm14        |
| 59629 | -1.29569 | 9.571521 | -4.14367 | 0.000736 | 0.010629 | -0.40456 | Sacm11       |
| 33516 | -1.2958  | 12.33261 | -4.68329 | 0.000237 | 0.006925 | 0.676547 | Fam158a      |
| 59064 | -1.29591 | 10.3742  | -4.89162 | 0.000155 | 0.005923 | 1.087397 | Gm8120       |
| 7746  | -1.29596 | 8.63976  | -4.6825  | 0.000238 | 0.006925 | 0.67499  | Hist2h3c2-ps |
| 34817 | -1.29602 | 11.86702 | -4.70261 | 0.000228 | 0.006851 | 0.714821 | Art3         |
| 61928 | -1.29629 | 9.140441 | -5.44473 | 5.05E-05 | 0.004235 | 2.154069 | Abhd8        |
| 44526 | -1.29655 | 8.478952 | -4.39232 | 0.000436 | 0.008771 | 0.096108 | Plp1         |
| 19445 | -1.29665 | 13.59653 | -4.17143 | 0.000694 | 0.010391 | -0.3485  | D4Wsu53e     |
| 14477 | -1.29727 | 10.1408  | -4.09376 | 0.000818 | 0.011164 | -0.50542 | Ppil1        |
| 53128 | -1.29764 | 8.863183 | -4.70597 | 0.000227 | 0.006827 | 0.721475 | Mboat2       |

|       |          |          |          |          |          |          |         |
|-------|----------|----------|----------|----------|----------|----------|---------|
| 7839  | -1.29804 | 12.25162 | -4.96673 | 0.000132 | 0.005817 | 1.234403 | Mrps24  |
| 62916 | -1.2981  | 11.77345 | -4.90408 | 0.000151 | 0.005914 | 1.111833 | Grsf1   |
| 8722  | -1.29831 | 12.15267 | -4.27671 | 0.000556 | 0.009599 | -0.13626 | Arfrp1  |
| 17063 | -1.29935 | 9.185093 | -4.69969 | 0.00023  | 0.006871 | 0.709044 | Zdhhc17 |
| 31218 | -1.29938 | 13.47378 | -4.51325 | 0.000338 | 0.007886 | 0.338167 | Sumo2   |
| 23648 | -1.29941 | 10.09518 | -6.42353 | 7.69E-06 | 0.002382 | 3.938045 | Pex11b  |
| 17505 | -1.3     | 11.72795 | -3.95703 | 0.001093 | 0.012483 | -0.78212 | Lman1   |
| 27108 | -1.30034 | 13.61155 | -5.00586 | 0.000122 | 0.005707 | 1.310728 | Alkbh7  |
| 48183 | -1.30038 | 9.653774 | -4.96981 | 0.000132 | 0.005815 | 1.24042  | Celsr1  |
| 34999 | -1.30042 | 11.08955 | -4.20909 | 0.000641 | 0.010117 | -0.27253 | Abcb9   |
| 4090  | -1.30042 | 12.97883 | -4.5997  | 0.000283 | 0.007333 | 0.510509 | Acadl   |
| 17992 | -1.30044 | 9.241154 | -4.63716 | 0.000261 | 0.007218 | 0.585007 | Ndufab1 |
| 55581 | -1.3006  | 10.48033 | -5.1435  | 9.25E-05 | 0.005346 | 1.577822 | Cryba4  |
| 57134 | -1.30064 | 10.50062 | -5.1643  | 8.87E-05 | 0.005274 | 1.617966 | Spnb1   |
| 36220 | -1.30071 | 9.874423 | -4.5122  | 0.000339 | 0.007886 | 0.336066 | Cnst    |
| 14585 | -1.30135 | 11.77027 | -3.99332 | 0.001012 | 0.012077 | -0.70865 | Ctsh    |
| 5524  | -1.3015  | 12.18498 | -4.12495 | 0.000766 | 0.010796 | -0.44238 | Clip4   |
| 61011 | -1.30178 | 10.73093 | -5.2722  | 7.13E-05 | 0.004827 | 1.82544  | Mterfd3 |
| 23412 | -1.30217 | 13.19333 | -4.33438 | 0.000492 | 0.009216 | -0.02024 | Mrps33  |
| 6280  | -1.30252 | 10.30784 | -5.62562 | 3.53E-05 | 0.003857 | 2.494281 | Myocd   |
| 4559  | -1.30253 | 10.91607 | -4.21566 | 0.000632 | 0.0101   | -0.25928 | Zfand1  |
| 3322  | -1.30298 | 11.16963 | -4.36831 | 0.000458 | 0.008954 | 0.04792  | Suox    |
| 9524  | -1.30306 | 10.82422 | -5.10427 | 0.0001   | 0.005451 | 1.501914 | Dguok   |
| 20342 | -1.30328 | 11.08561 | -4.19305 | 0.000663 | 0.010247 | -0.30487 | Exosc7  |
| 52648 | -1.30332 | 9.019143 | -4.89568 | 0.000153 | 0.005923 | 1.095362 | Adrbk2  |
| 17826 | -1.30349 | 10.95512 | -4.40624 | 0.000423 | 0.008651 | 0.124019 | Srsf6   |

|       |          |          |          |          |          |          |               |
|-------|----------|----------|----------|----------|----------|----------|---------------|
| 4441  | -1.30354 | 12.05415 | -4.05539 | 0.000887 | 0.01149  | -0.58302 | Med28         |
| 16076 | -1.30453 | 11.22702 | -4.29907 | 0.00053  | 0.009469 | -0.09126 | Efna1         |
| 61593 | -1.30459 | 8.185837 | -3.35095 | 0.003972 | 0.02335  | -2.00702 | Clec1b        |
| 1767  | -1.30475 | 9.346805 | -4.15204 | 0.000723 | 0.010601 | -0.38767 | Ppnr          |
| 38593 | -1.30477 | 9.477721 | -4.41409 | 0.000416 | 0.008591 | 0.13976  | Myliip        |
| 30764 | -1.30512 | 9.797008 | -4.27247 | 0.000561 | 0.009647 | -0.14479 | Pdpl          |
| 2675  | -1.30513 | 10.40795 | -4.74057 | 0.000211 | 0.006665 | 0.789934 | Zfp639        |
| 25549 | -1.30536 | 9.640888 | -3.79313 | 0.001549 | 0.014578 | -1.1142  | Taf4a         |
| 61608 | -1.30567 | 11.97743 | -4.50756 | 0.000342 | 0.007904 | 0.326811 | Aldh5a1       |
| 23781 | -1.30609 | 11.67696 | -4.49249 | 0.000353 | 0.00797  | 0.296703 | Uck1          |
| 34660 | -1.30712 | 11.69829 | -4.10175 | 0.000804 | 0.011092 | -0.48928 | Rhoq          |
| 34927 | -1.30793 | 10.77986 | -4.41348 | 0.000417 | 0.008594 | 0.138532 | Gm15800       |
| 39808 | -1.30826 | 11.15181 | -3.32478 | 0.004199 | 0.024144 | -2.05949 | Pxdn          |
| 46130 | -1.30828 | 10.17988 | -5.22396 | 7.86E-05 | 0.004964 | 1.73288  | Slc46a3       |
| 52860 | -1.30859 | 10.17289 | -4.23347 | 0.000609 | 0.010041 | -0.22336 | Fkrp          |
| 60170 | -1.30902 | 9.867918 | -3.50359 | 0.002871 | 0.01976  | -1.6999  | Scd2          |
| 4550  | -1.30935 | 9.772962 | -4.22361 | 0.000622 | 0.0101   | -0.24323 | Slc4a7        |
| 31609 | -1.30939 | 9.432871 | -3.98933 | 0.001021 | 0.012136 | -0.71671 | C1galt1c1     |
| 14641 | -1.30967 | 12.2814  | -6.20098 | 1.17E-05 | 0.002765 | 3.545005 | Gm5048        |
| 20491 | -1.31001 | 10.87885 | -4.54296 | 0.000318 | 0.007663 | 0.397476 | Mpst          |
| 20352 | -1.31003 | 10.55904 | -4.34998 | 0.000476 | 0.009113 | 0.011107 | Irak1         |
| 32345 | -1.31052 | 9.885104 | -4.00481 | 0.000988 | 0.01201  | -0.68539 | Gt(ROSA)26Sor |
| 46173 | -1.31065 | 10.98482 | -4.10709 | 0.000795 | 0.011053 | -0.47848 | Dynlt1e       |
| 2860  | -1.31084 | 9.060545 | -4.52732 | 0.000329 | 0.007752 | 0.366257 | Aga           |
| 27810 | -1.31131 | 11.07518 | -4.0257  | 0.000945 | 0.011764 | -0.64309 | Mgst1         |
| 49514 | -1.31171 | 9.606628 | -4.21382 | 0.000635 | 0.0101   | -0.26299 | Phf8          |

|       |          |          |          |          |          |          |              |
|-------|----------|----------|----------|----------|----------|----------|--------------|
| 27639 | -1.31179 | 8.515713 | -4.62688 | 0.000267 | 0.007229 | 0.564573 | Zfp955a      |
| 40671 | -1.31248 | 13.13423 | -4.35632 | 0.00047  | 0.009047 | 0.023832 | Tspan3       |
| 19712 | -1.31277 | 9.022565 | -4.69427 | 0.000232 | 0.006885 | 0.698304 | LOC100502627 |
| 40022 | -1.31374 | 8.735284 | -4.87019 | 0.000161 | 0.006012 | 1.045344 | Kcnn2        |
| 40682 | -1.314   | 9.487674 | -4.80176 | 0.000186 | 0.006267 | 0.910721 | Ormdl1       |
| 23130 | -1.31404 | 12.37988 | -4.66857 | 0.000245 | 0.007001 | 0.647359 | Mllt6        |
| 28292 | -1.31408 | 10.71722 | -3.87777 | 0.001294 | 0.013381 | -0.9427  | Zfp664       |
| 20451 | -1.31424 | 10.83634 | -4.50542 | 0.000344 | 0.007904 | 0.322536 | Rnf150       |
| 44708 | -1.31427 | 13.16827 | -4.96698 | 0.000132 | 0.005817 | 1.234894 | Pdrgl        |
| 29359 | -1.31478 | 10.04972 | -4.00809 | 0.000981 | 0.011995 | -0.67875 | Tmem123      |
| 55616 | -1.31504 | 10.02951 | -4.76711 | 0.0002   | 0.006541 | 0.842382 | Pigy         |
| 59603 | -1.3152  | 9.221223 | -5.33455 | 6.30E-05 | 0.004625 | 1.944651 | Lonrf1       |
| 61909 | -1.31524 | 11.64415 | -4.63868 | 0.000261 | 0.007218 | 0.588021 | Neurl4       |
| 31317 | -1.31566 | 11.21222 | -4.07371 | 0.000853 | 0.011338 | -0.54597 | Smad5        |
| 19430 | -1.3158  | 10.83468 | -4.38153 | 0.000446 | 0.008891 | 0.074459 | Mrpl32       |
| 61679 | -1.31683 | 9.719764 | -5.66929 | 3.24E-05 | 0.003769 | 2.575739 | Aasdhppt     |
| 50305 | -1.31713 | 10.78541 | -3.52606 | 0.002736 | 0.01928  | -1.65455 | Mapre2       |
| 19593 | -1.31728 | 10.62955 | -4.9396  | 0.00014  | 0.005859 | 1.18138  | Fbxo21       |
| 43588 | -1.31765 | 11.27738 | -4.06572 | 0.000868 | 0.011414 | -0.56213 | Magoh        |
| 59953 | -1.31785 | 13.44353 | -4.07426 | 0.000852 | 0.011331 | -0.54485 | Skpl1a       |
| 28360 | -1.31809 | 11.18383 | -4.85177 | 0.000168 | 0.006089 | 1.009151 | Tsc22d1      |
| 15109 | -1.31856 | 11.099   | -4.03313 | 0.00093  | 0.011726 | -0.62805 | Ift20        |
| 22003 | -1.3189  | 12.7983  | -4.58997 | 0.000288 | 0.007384 | 0.491145 | Lama2        |
| 46767 | -1.31919 | 9.340568 | -5.03907 | 0.000114 | 0.005645 | 1.375381 | Inadl        |
| 14919 | -1.31959 | 12.4449  | -3.83759 | 0.001409 | 0.013936 | -1.02411 | Nr3c1        |
| 20497 | -1.3197  | 10.4939  | -4.66188 | 0.000248 | 0.007051 | 0.634083 | Tmem25       |

|       |          |          |          |          |          |          |         |
|-------|----------|----------|----------|----------|----------|----------|---------|
| 61062 | -1.31992 | 10.17673 | -5.08179 | 0.000105 | 0.005504 | 1.458349 | Cdc26   |
| 16907 | -1.32027 | 7.426025 | -3.7074  | 0.001859 | 0.01565  | -1.28786 | Pcp4    |
| 20875 | -1.32071 | 10.39807 | -4.31981 | 0.000508 | 0.009336 | -0.04954 | Mdp1    |
| 46409 | -1.32075 | 12.26657 | -4.91886 | 0.000146 | 0.005905 | 1.140777 | Sgk3    |
| 4440  | -1.32091 | 11.21032 | -4.22609 | 0.000618 | 0.010087 | -0.23824 | Rab9    |
| 20160 | -1.32134 | 11.39531 | -4.51576 | 0.000337 | 0.007874 | 0.343187 | Aldh4a1 |
| 52623 | -1.32177 | 9.801266 | -4.56877 | 0.000301 | 0.007502 | 0.448934 | Tmem41b |
| 19776 | -1.32179 | 12.8731  | -4.82249 | 0.000178 | 0.006182 | 0.95156  | Wbp1    |
| 33595 | -1.32188 | 11.00023 | -4.50242 | 0.000346 | 0.007904 | 0.316539 | Stat5b  |
| 45020 | -1.32199 | 10.6072  | -4.54274 | 0.000318 | 0.007663 | 0.39704  | Tcf15   |
| 36039 | -1.32229 | 12.18009 | -4.47892 | 0.000363 | 0.008051 | 0.269569 | Mtx2    |
| 41513 | -1.32261 | 13.22222 | -5.36744 | 5.89E-05 | 0.004449 | 2.007344 | Ppa2    |
| 43722 | -1.32354 | 8.925707 | -4.98649 | 0.000127 | 0.005759 | 1.272964 | Six5    |
| 53504 | -1.32359 | 10.89061 | -4.24053 | 0.0006   | 0.009984 | -0.20913 | Fbxo8   |
| 4501  | -1.324   | 8.212507 | -5.63397 | 3.48E-05 | 0.003851 | 2.509884 | Egf     |
| 41106 | -1.3243  | 10.51275 | -4.10594 | 0.000797 | 0.011056 | -0.48079 | Dtymk   |
| 16171 | -1.32446 | 8.894023 | -5.00676 | 0.000122 | 0.005707 | 1.312488 | Parp1   |
| 61479 | -1.32447 | 11.74485 | -4.10695 | 0.000795 | 0.011053 | -0.47875 | Pigp    |
| 17993 | -1.32452 | 11.18307 | -4.14461 | 0.000734 | 0.010615 | -0.40266 | Meis1   |
| 41621 | -1.32461 | 12.35903 | -4.66898 | 0.000245 | 0.007001 | 0.648173 | Aifm1   |
| 58293 | -1.32514 | 11.06602 | -4.2226  | 0.000623 | 0.0101   | -0.24528 | Rab18   |
| 38228 | -1.32522 | 10.84282 | -4.85516 | 0.000167 | 0.006078 | 1.015814 | Ggct    |
| 3097  | -1.3255  | 10.69088 | -3.17196 | 0.005806 | 0.029053 | -2.36449 | Dusp1   |
| 29036 | -1.32632 | 8.903485 | -4.08664 | 0.00083  | 0.011241 | -0.51982 | Cc2d2a  |
| 62913 | -1.32643 | 11.63141 | -4.85437 | 0.000167 | 0.006078 | 1.014265 | Mrpl50  |
| 58207 | -1.32647 | 10.49073 | -4.53737 | 0.000322 | 0.007678 | 0.386325 | Ctage5  |

|       |          |          |          |          |          |          |             |
|-------|----------|----------|----------|----------|----------|----------|-------------|
| 41278 | -1.32657 | 9.025494 | -3.89961 | 0.001235 | 0.013201 | -0.89845 | Eef1e1      |
| 28932 | -1.32728 | 11.52845 | -4.48302 | 0.00036  | 0.008021 | 0.277753 | LOC676974   |
| 17765 | -1.32806 | 11.8871  | -4.31597 | 0.000512 | 0.009337 | -0.05726 | Prosc       |
| 24127 | -1.32815 | 8.554612 | -5.47082 | 4.80E-05 | 0.004197 | 2.203415 | Tmc7        |
| 57505 | -1.32832 | 10.97018 | -4.02549 | 0.000945 | 0.011764 | -0.64352 | Mogs        |
| 43502 | -1.32897 | 12.92848 | -4.71042 | 0.000225 | 0.006825 | 0.730294 | Mmadhc      |
| 35993 | -1.32906 | 11.77611 | -4.7267  | 0.000217 | 0.006719 | 0.76251  | Fam82b      |
| 49570 | -1.32983 | 11.54994 | -5.07983 | 0.000105 | 0.005504 | 1.454553 | Immp1l      |
| 60646 | -1.33041 | 11.21697 | -4.74718 | 0.000208 | 0.006636 | 0.803017 | Pin1        |
| 1914  | -1.33066 | 9.387305 | -3.75631 | 0.001675 | 0.015024 | -1.1888  | Tfrc        |
| 50284 | -1.33077 | 12.76082 | -4.57382 | 0.000298 | 0.007471 | 0.458981 | Armc2       |
| 50078 | -1.33107 | 11.41605 | -4.6986  | 0.00023  | 0.006871 | 0.706891 | Tmem37      |
| 18209 | -1.33107 | 12.98857 | -5.01519 | 0.00012  | 0.005671 | 1.328915 | D16H22S680E |
| 46935 | -1.33187 | 8.20446  | -4.54998 | 0.000313 | 0.007617 | 0.411474 | Hmgcs2      |
| 26975 | -1.33273 | 12.26314 | -3.89412 | 0.00125  | 0.013205 | -0.90957 | Txnip       |
| 24895 | -1.33313 | 9.832786 | -4.49942 | 0.000348 | 0.007904 | 0.310553 | Mzt2        |
| 45648 | -1.33336 | 8.694328 | -5.55338 | 4.08E-05 | 0.00398  | 2.358955 | Apbb1       |
| 28917 | -1.33382 | 11.68612 | -4.55444 | 0.00031  | 0.007593 | 0.420366 | Rasl2-9-ps  |
| 28795 | -1.33405 | 10.51503 | -4.42224 | 0.000409 | 0.008558 | 0.156093 | Rbm4        |
| 36691 | -1.33413 | 10.18972 | -3.8764  | 0.001298 | 0.013407 | -0.94548 | Pja1        |
| 14618 | -1.33416 | 9.908832 | -4.02636 | 0.000944 | 0.011762 | -0.64175 | Ccdc45      |
| 42647 | -1.33423 | 12.35997 | -4.90529 | 0.00015  | 0.005914 | 1.114205 | Sgcg        |
| 5869  | -1.33431 | 8.50779  | -3.55476 | 0.002574 | 0.018637 | -1.59661 | Cdon        |
| 10321 | -1.3345  | 11.41873 | -4.10358 | 0.000801 | 0.011076 | -0.48558 | l7Rn6       |
| 36577 | -1.33454 | 11.13871 | -4.83218 | 0.000175 | 0.006133 | 0.970618 | Ccdc47      |
| 32073 | -1.33486 | 12.83263 | -5.13992 | 9.31E-05 | 0.005346 | 1.570897 | Rxrg        |

|       |          |          |          |          |          |          |          |
|-------|----------|----------|----------|----------|----------|----------|----------|
| 27400 | -1.33537 | 9.616389 | -6.323   | 9.28E-06 | 0.002463 | 3.761457 | Lengl    |
| 14351 | -1.33543 | 11.25891 | -3.83245 | 0.001425 | 0.01399  | -1.03453 | Ppp2r5c  |
| 38757 | -1.33585 | 11.37792 | -4.34762 | 0.000479 | 0.009113 | 0.006355 | Ccnk     |
| 23800 | -1.33619 | 9.898291 | -4.88792 | 0.000156 | 0.005925 | 1.080144 | Mapkapk3 |
| 27279 | -1.3364  | 11.84933 | -3.9668  | 0.001071 | 0.012374 | -0.76234 | Ppid     |
| 30592 | -1.33671 | 14.49962 | -5.21435 | 8.01E-05 | 0.004967 | 1.7144   | Sdhd     |
| 15624 | -1.33687 | 9.297134 | -3.06349 | 0.0073   | 0.033285 | -2.57924 | Phkg1    |
| 17798 | -1.33691 | 11.35597 | -4.44372 | 0.000391 | 0.008366 | 0.199118 | Mrpl45   |
| 1090  | -1.33739 | 10.83653 | -5.3248  | 6.42E-05 | 0.004669 | 1.926054 | Il10rb   |
| 20549 | -1.33774 | 8.519897 | -3.01471 | 0.008089 | 0.035309 | -2.67526 | Rbp4     |
| 31666 | -1.33833 | 13.07789 | -4.92449 | 0.000144 | 0.005905 | 1.151807 | Ptcd3    |
| 43274 | -1.33846 | 8.804181 | -5.45099 | 4.99E-05 | 0.004215 | 2.16592  | Gcdh     |
| 435   | -1.3397  | 10.77676 | -3.65433 | 0.002082 | 0.016684 | -1.39529 | Pesk6    |
| 38519 | -1.33974 | 9.574478 | -5.10407 | 0.0001   | 0.005451 | 1.501527 | Mreg     |
| 14821 | -1.34077 | 9.438196 | -4.7088  | 0.000225 | 0.006827 | 0.72708  | Synpo2   |
| 45836 | -1.34121 | 10.80869 | -3.49238 | 0.00294  | 0.019991 | -1.72251 | Anp32a   |
| 26171 | -1.34123 | 12.91906 | -5.67295 | 3.22E-05 | 0.003769 | 2.582539 | Tecr     |
| 36006 | -1.34189 | 8.924722 | -5.20276 | 8.20E-05 | 0.005036 | 1.692104 | Epb4.1l3 |
| 55820 | -1.34296 | 11.15044 | -5.53758 | 4.20E-05 | 0.00398  | 2.329261 | Antxr2   |
| 2397  | -1.34296 | 11.02561 | -4.27385 | 0.000559 | 0.009638 | -0.14201 | Ttll1    |
| 25740 | -1.34337 | 13.22247 | -3.04839 | 0.007536 | 0.033928 | -2.609   | Myl1     |
| 33592 | -1.34364 | 12.68751 | -3.81044 | 0.001493 | 0.014332 | -1.07913 | Pdia6    |
| 22435 | -1.34374 | 9.134068 | -5.47262 | 4.78E-05 | 0.004197 | 2.20682  | Dhrs11   |
| 24721 | -1.34414 | 10.83928 | -4.17469 | 0.000689 | 0.010365 | -0.34193 | Fam53c   |
| 37759 | -1.34439 | 9.808112 | -4.54431 | 0.000317 | 0.007663 | 0.400157 | Triap1   |
| 12960 | -1.34498 | 10.75778 | -6.43127 | 7.58E-06 | 0.002382 | 3.951588 | Acads    |



|       |          |          |          |          |          |          |          |
|-------|----------|----------|----------|----------|----------|----------|----------|
| 39782 | -1.34503 | 9.946135 | -4.47181 | 0.000369 | 0.008115 | 0.255338 | Sdhaf2   |
| 26955 | -1.34504 | 10.32776 | -4.13014 | 0.000757 | 0.010755 | -0.4319  | Ift8l    |
| 22641 | -1.34516 | 11.06083 | -4.90638 | 0.00015  | 0.005914 | 1.116336 | Prickle1 |
| 12250 | -1.34533 | 10.80718 | -4.19087 | 0.000666 | 0.010268 | -0.30928 | Top1     |
| 52358 | -1.34567 | 12.70517 | -5.49946 | 4.53E-05 | 0.004091 | 2.257475 | Mrps36   |
| 54824 | -1.34604 | 7.79767  | -3.9729  | 0.001057 | 0.012341 | -0.74998 | Acsm5    |
| 12000 | -1.34754 | 11.4266  | -4.95823 | 0.000135 | 0.005828 | 1.217786 | Naa20    |
| 17127 | -1.34764 | 9.320873 | -5.81849 | 2.43E-05 | 0.00335  | 2.851931 | Fdft1    |
| 21051 | -1.34813 | 8.912735 | -5.16422 | 8.87E-05 | 0.005274 | 1.617816 | Rrs1     |
| 24574 | -1.34828 | 9.82536  | -4.38078 | 0.000446 | 0.008891 | 0.072941 | Slc5a6   |
| 46317 | -1.3486  | 12.31149 | -3.36588 | 0.003848 | 0.022932 | -1.97705 | Serpinh1 |
| 62956 | -1.34923 | 8.773159 | -4.88609 | 0.000156 | 0.005925 | 1.07654  | Asap3    |
| 55600 | -1.34949 | 12.20887 | -3.03314 | 0.007782 | 0.034451 | -2.63902 | Klf2     |
| 16557 | -1.34952 | 9.897292 | -4.58134 | 0.000294 | 0.007457 | 0.473966 | Isoc1    |
| 58182 | -1.34985 | 9.833498 | -6.15514 | 1.27E-05 | 0.002798 | 3.463114 | Ptov1    |
| 33740 | -1.35012 | 12.17619 | -4.18911 | 0.000669 | 0.010268 | -0.31282 | Ngrn     |
| 34199 | -1.35027 | 13.26207 | -4.62134 | 0.00027  | 0.007258 | 0.553567 | Selenbp1 |
| 61862 | -1.35114 | 9.290657 | -3.79361 | 0.001548 | 0.014574 | -1.11322 | Igf1     |
| 14866 | -1.35114 | 10.34661 | -4.21378 | 0.000635 | 0.0101   | -0.26306 | Emg1     |
| 27603 | -1.35134 | 11.88993 | -4.63736 | 0.000261 | 0.007218 | 0.585403 | Thoc7    |
| 26477 | -1.35134 | 13.18805 | -4.15067 | 0.000725 | 0.010601 | -0.39042 | Sspn     |
| 13982 | -1.35142 | 13.69581 | -4.6878  | 0.000235 | 0.006899 | 0.685483 | Prpf8    |
| 22713 | -1.35172 | 14.01442 | -4.93034 | 0.000143 | 0.005878 | 1.163253 | Dbi      |
| 59285 | -1.35218 | 8.090381 | -6.13836 | 1.31E-05 | 0.002798 | 3.433046 | Klhdc1   |
| 44251 | -1.35232 | 10.68909 | -3.78396 | 0.00158  | 0.014646 | -1.13278 | Osbp18   |
| 56336 | -1.35242 | 14.86947 | -5.26575 | 7.23E-05 | 0.004856 | 1.81308  | Sucla2   |

|       |          |          |          |          |          |          |           |
|-------|----------|----------|----------|----------|----------|----------|-----------|
| 61612 | -1.35293 | 9.918187 | -4.23421 | 0.000608 | 0.010034 | -0.22186 | Sfrs18    |
| 59384 | -1.35294 | 8.595409 | -4.99897 | 0.000124 | 0.005707 | 1.297309 | Magix     |
| 55157 | -1.35344 | 10.47049 | -4.34848 | 0.000478 | 0.009113 | 0.008078 | Manf      |
| 56194 | -1.35357 | 10.01306 | -4.83175 | 0.000175 | 0.006133 | 0.969787 | Mipep     |
| 54782 | -1.35405 | 11.93421 | -4.8122  | 0.000182 | 0.006231 | 0.931284 | Mad211bp  |
| 16534 | -1.35415 | 11.76525 | -4.96997 | 0.000132 | 0.005815 | 1.240723 | Pxmp2     |
| 11834 | -1.35424 | 9.490344 | -5.27265 | 7.13E-05 | 0.004827 | 1.826306 | Lpcat3    |
| 25680 | -1.35536 | 10.29773 | -4.45179 | 0.000385 | 0.008288 | 0.215272 | Dram2     |
| 31697 | -1.35593 | 12.17781 | -4.11308 | 0.000785 | 0.010955 | -0.46636 | Kctd2     |
| 34141 | -1.35652 | 9.102791 | -3.71322 | 0.001837 | 0.015584 | -1.27608 | Nr2f1     |
| 26352 | -1.35675 | 11.76153 | -4.92957 | 0.000143 | 0.005878 | 1.161756 | Hnrnpa2b1 |
| 8788  | -1.35707 | 10.65962 | -4.39871 | 0.00043  | 0.008694 | 0.10892  | Tarsl2    |
| 18649 | -1.35738 | 9.768788 | -4.88126 | 0.000158 | 0.005925 | 1.067078 | Fastkd5   |
| 57973 | -1.35769 | 13.24405 | -5.26422 | 7.25E-05 | 0.004856 | 1.81016  | Tmem223   |
| 56826 | -1.35777 | 13.40865 | -5.49795 | 4.55E-05 | 0.004091 | 2.254639 | Acacb     |
| 49190 | -1.35822 | 9.80229  | -4.47709 | 0.000365 | 0.008073 | 0.265903 | Snn       |
| 38743 | -1.35865 | 9.386396 | -4.83437 | 0.000174 | 0.006133 | 0.974937 | Gpt2      |
| 9680  | -1.36103 | 11.43244 | -4.92561 | 0.000144 | 0.005904 | 1.154005 | Zfp629    |
| 3102  | -1.36118 | 9.909597 | -4.7555  | 0.000205 | 0.006627 | 0.819452 | Svip      |
| 61811 | -1.36227 | 9.722623 | -2.82783 | 0.011958 | 0.04524  | -3.03918 | Cx3cr1    |
| 39994 | -1.36322 | 8.288033 | -4.1796  | 0.000682 | 0.010327 | -0.33201 | Tppp      |
| 21278 | -1.3636  | 13.25377 | -4.50063 | 0.000347 | 0.007904 | 0.31296  | H2afv     |
| 43100 | -1.36375 | 10.92453 | -4.58298 | 0.000293 | 0.007445 | 0.477226 | Eif4e     |
| 10703 | -1.36446 | 9.121128 | -4.57664 | 0.000296 | 0.007471 | 0.464608 | Chadl     |
| 13726 | -1.36553 | 9.905463 | -4.98404 | 0.000128 | 0.005764 | 1.268188 | Nmnat3    |
| 60693 | -1.36591 | 9.241848 | -5.96606 | 1.82E-05 | 0.002941 | 3.121936 | Paqr9     |

|       |          |          |          |          |          |          |         |
|-------|----------|----------|----------|----------|----------|----------|---------|
| 36535 | -1.36607 | 8.750261 | -4.50167 | 0.000347 | 0.007904 | 0.315043 | Tmtc4   |
| 13722 | -1.36634 | 11.4278  | -5.09079 | 0.000103 | 0.0055   | 1.475792 | Mrps30  |
| 26205 | -1.36686 | 10.02459 | -4.28161 | 0.00055  | 0.009575 | -0.1264  | Gm6195  |
| 17418 | -1.36718 | 13.1905  | -4.84058 | 0.000172 | 0.006133 | 0.987158 | Gnpat   |
| 41235 | -1.36765 | 7.861538 | -2.79185 | 0.012886 | 0.04745  | -3.10844 | Ptgfr   |
| 52425 | -1.36873 | 9.54928  | -3.68784 | 0.001939 | 0.016051 | -1.32747 | Tppp3   |
| 53113 | -1.36903 | 12.75956 | -5.98567 | 1.76E-05 | 0.002891 | 3.15756  | Ivd     |
| 50729 | -1.36936 | 12.71807 | -4.25695 | 0.000579 | 0.009789 | -0.17604 | Imp3    |
| 22188 | -1.36999 | 11.47559 | -3.99803 | 0.001002 | 0.012061 | -0.69911 | Tra2a   |
| 19229 | -1.37047 | 14.10246 | -5.45599 | 4.94E-05 | 0.004211 | 2.17538  | Echs1   |
| 61086 | -1.37201 | 12.90233 | -5.29757 | 6.78E-05 | 0.004788 | 1.874018 | Prdx3   |
| 17940 | -1.37246 | 12.12436 | -4.22624 | 0.000618 | 0.010087 | -0.23795 | Mrpl36  |
| 13815 | -1.37252 | 9.210762 | -5.62638 | 3.53E-05 | 0.003857 | 2.495701 | Tmem117 |
| 50770 | -1.37255 | 13.30577 | -4.45094 | 0.000385 | 0.008295 | 0.213587 | Kpna2   |
| 54561 | -1.37256 | 11.37448 | -4.49453 | 0.000352 | 0.007957 | 0.300762 | Ibtk    |
| 61801 | -1.37283 | 13.07588 | -4.6322  | 0.000264 | 0.007219 | 0.575155 | Tmem66  |
| 62511 | -1.37311 | 10.24045 | -5.08764 | 0.000104 | 0.0055   | 1.469696 | Ankrd24 |
| 21983 | -1.37329 | 9.028897 | -4.96216 | 0.000134 | 0.005828 | 1.225464 | Scara5  |
| 51525 | -1.37415 | 10.26162 | -4.87974 | 0.000158 | 0.005925 | 1.064083 | Cdkn1c  |
| 28938 | -1.37491 | 12.20316 | -4.11297 | 0.000785 | 0.010955 | -0.46659 | Amd2    |
| 14468 | -1.37558 | 13.95792 | -5.27939 | 7.03E-05 | 0.004827 | 1.839218 | Mgrn1   |
| 13208 | -1.37618 | 10.90748 | -4.28286 | 0.000549 | 0.009571 | -0.12387 | Lonp2   |
| 3546  | -1.3763  | 11.51853 | -4.83283 | 0.000174 | 0.006133 | 0.971897 | Foxred1 |
| 14769 | -1.37891 | 14.3345  | -5.27826 | 7.05E-05 | 0.004827 | 1.837064 | Ybx1    |
| 6505  | -1.37982 | 12.18499 | -4.04713 | 0.000903 | 0.011556 | -0.59972 | Sh3glb1 |
| 48646 | -1.38011 | 12.2556  | -4.72051 | 0.00022  | 0.006777 | 0.750276 | Pygb    |

|       |          |          |          |          |          |          |          |
|-------|----------|----------|----------|----------|----------|----------|----------|
| 9001  | -1.38012 | 9.116814 | -4.45606 | 0.000381 | 0.008263 | 0.223827 | Dsc2     |
| 23672 | -1.38057 | 10.40637 | -4.83249 | 0.000174 | 0.006133 | 0.971245 | Ythdf3   |
| 14004 | -1.38134 | 10.37996 | -4.36621 | 0.00046  | 0.008954 | 0.043707 | Mtfr1    |
| 9076  | -1.38272 | 9.807531 | -3.80594 | 0.001507 | 0.014374 | -1.08824 | Clec10a  |
| 27771 | -1.38308 | 15.70328 | -6.96176 | 2.89E-06 | 0.001944 | 4.856819 | Fhl2     |
| 7066  | -1.38392 | 11.11824 | -4.41689 | 0.000414 | 0.008573 | 0.145361 | Tmod1    |
| 31638 | -1.38446 | 8.417672 | -4.79058 | 0.00019  | 0.006332 | 0.888693 | Hnmt     |
| 21770 | -1.3853  | 11.52008 | -4.67647 | 0.000241 | 0.006957 | 0.66303  | Nsmaf    |
| 3128  | -1.38586 | 11.14194 | -4.67478 | 0.000242 | 0.006964 | 0.65968  | Mtg1     |
| 21024 | -1.38626 | 11.79875 | -4.90785 | 0.000149 | 0.005914 | 1.11921  | Mrps31   |
| 22887 | -1.38646 | 8.563193 | -4.74641 | 0.000208 | 0.006636 | 0.801481 | Slc47a1  |
| 24663 | -1.38657 | 10.11521 | -5.03163 | 0.000116 | 0.005645 | 1.360904 | Uhrf1bp1 |
| 6294  | -1.38789 | 12.11615 | -4.99476 | 0.000125 | 0.005707 | 1.2891   | Mrpl18   |
| 32887 | -1.38791 | 9.82995  | -4.00734 | 0.000982 | 0.011995 | -0.68026 | Golm1    |
| 61650 | -1.38809 | 13.37887 | -4.6082  | 0.000278 | 0.007325 | 0.527425 | Eif4a2   |
| 32248 | -1.38825 | 11.49829 | -5.40169 | 5.51E-05 | 0.004397 | 2.072451 | Pstk     |
| 40613 | -1.38887 | 12.40011 | -3.92533 | 0.001169 | 0.012871 | -0.84633 | Mrps6    |
| 50522 | -1.38921 | 14.04896 | -6.40978 | 7.89E-06 | 0.002382 | 3.913985 | Idh3a    |
| 37515 | -1.38922 | 10.27958 | -4.45853 | 0.000379 | 0.008253 | 0.228766 | Metrn1   |
| 56092 | -1.38943 | 15.83345 | -6.79244 | 3.91E-06 | 0.002278 | 4.572657 | Hadhb    |
| 43452 | -1.38953 | 11.90861 | -4.93602 | 0.000141 | 0.005859 | 1.17436  | Dnajc19  |
| 35206 | -1.39026 | 9.309153 | -4.44901 | 0.000387 | 0.008312 | 0.209719 | Paip2b   |
| 27964 | -1.3909  | 11.00273 | -4.53586 | 0.000323 | 0.007678 | 0.383308 | Lims1    |
| 18603 | -1.39329 | 10.79236 | -4.68923 | 0.000235 | 0.006899 | 0.68832  | Trap1    |
| 55700 | -1.39398 | 13.01608 | -5.76272 | 2.70E-05 | 0.003547 | 2.749066 | D13Mgi7  |
| 32239 | -1.39411 | 9.939437 | -4.90007 | 0.000152 | 0.005922 | 1.103963 | Ubr3     |

|       |          |          |          |          |          |          |         |
|-------|----------|----------|----------|----------|----------|----------|---------|
| 44829 | -1.39434 | 9.817534 | -5.39512 | 5.58E-05 | 0.004397 | 2.059988 | Rnf5    |
| 60173 | -1.3949  | 10.62463 | -3.84553 | 0.001386 | 0.013862 | -1.00803 | Cxadr   |
| 15554 | -1.39505 | 12.40602 | -5.23033 | 7.76E-05 | 0.004955 | 1.74511  | Mrpl39  |
| 62843 | -1.3952  | 9.8384   | -4.26305 | 0.000572 | 0.009722 | -0.16377 | Vtn     |
| 35750 | -1.3958  | 14.42254 | -5.0175  | 0.000119 | 0.005671 | 1.333401 | Rps2    |
| 47908 | -1.39605 | 9.976987 | -6.39347 | 8.13E-06 | 0.002422 | 3.885407 | L2hgdh  |
| 54896 | -1.39609 | 11.09211 | -5.01587 | 0.00012  | 0.005671 | 1.330227 | Mcee    |
| 30840 | -1.39618 | 10.73606 | -4.20328 | 0.000649 | 0.010138 | -0.28425 | Snx3    |
| 27106 | -1.39624 | 11.9057  | -6.05645 | 1.54E-05 | 0.002865 | 3.285701 | Apip    |
| 44577 | -1.39719 | 10.40334 | -4.29134 | 0.000539 | 0.009544 | -0.10681 | Carns1  |
| 27821 | -1.39758 | 7.52224  | -5.27177 | 7.14E-05 | 0.004827 | 1.82462  | Cngb3   |
| 30828 | -1.39819 | 8.271544 | -5.3979  | 5.55E-05 | 0.004397 | 2.065252 | MacroD2 |
| 37811 | -1.39893 | 12.0819  | -4.65161 | 0.000254 | 0.007111 | 0.613706 | Trmt2b  |
| 31003 | -1.39948 | 10.54881 | -5.25308 | 7.41E-05 | 0.004877 | 1.788786 | Chrac1  |
| 6853  | -1.40038 | 12.0931  | -6.355   | 8.74E-06 | 0.002463 | 3.817824 | Hadha   |
| 11122 | -1.4006  | 11.93546 | -6.12554 | 1.35E-05 | 0.002798 | 3.410056 | Ppara   |
| 51494 | -1.40139 | 11.83629 | -4.90277 | 0.000151 | 0.005914 | 1.109252 | Mrps17  |
| 44450 | -1.4015  | 13.19075 | -5.47961 | 4.72E-05 | 0.004174 | 2.220024 | Glr3    |
| 7968  | -1.40202 | 10.4833  | -4.74824 | 0.000208 | 0.006636 | 0.805102 | Pex7    |
| 7841  | -1.40372 | 10.42715 | -4.99593 | 0.000125 | 0.005707 | 1.291382 | Pigu    |
| 28752 | -1.40414 | 9.234751 | -4.89384 | 0.000154 | 0.005923 | 1.091746 | Dusp23  |
| 13025 | -1.40433 | 10.85332 | -4.66578 | 0.000246 | 0.007012 | 0.641818 | Dtd1    |
| 24247 | -1.4048  | 9.138931 | -2.91572 | 0.009955 | 0.040234 | -2.86885 | Aldh1b1 |
| 9532  | -1.40491 | 11.59287 | -6.13737 | 1.32E-05 | 0.002798 | 3.431271 | Alad    |
| 34488 | -1.40622 | 11.03271 | -4.92109 | 0.000145 | 0.005905 | 1.145143 | Hscb    |
| 41341 | -1.40677 | 10.38896 | -4.24088 | 0.000599 | 0.009984 | -0.20843 | Phf10   |

|       |          |          |          |          |          |          |          |
|-------|----------|----------|----------|----------|----------|----------|----------|
| 10584 | -1.40784 | 13.29751 | -4.67663 | 0.000241 | 0.006957 | 0.663342 | Ndufs2   |
| 57113 | -1.40801 | 9.177669 | -5.09531 | 0.000102 | 0.005481 | 1.484556 | Tnfrsf25 |
| 39003 | -1.40817 | 9.164782 | -4.31449 | 0.000513 | 0.009341 | -0.06023 | Sned1    |
| 20987 | -1.4082  | 12.35518 | -3.97968 | 0.001042 | 0.012279 | -0.73625 | Dhrs7    |
| 33408 | -1.40859 | 10.00555 | -4.34582 | 0.000481 | 0.009114 | 0.002734 | F3       |
| 2802  | -1.40936 | 10.58659 | -4.49378 | 0.000352 | 0.007957 | 0.299281 | Pfn2     |
| 18933 | -1.4099  | 11.9095  | -4.48275 | 0.000361 | 0.008021 | 0.277213 | Churc1   |
| 9904  | -1.41045 | 8.537886 | -4.07559 | 0.00085  | 0.011306 | -0.54215 | Cd209f   |
| 4079  | -1.41058 | 9.375603 | -4.31824 | 0.000509 | 0.009336 | -0.0527  | Fndc4    |
| 26239 | -1.41079 | 9.557391 | -4.79811 | 0.000187 | 0.006267 | 0.903523 | Adsl     |
| 30529 | -1.41141 | 13.80947 | -6.33996 | 8.99E-06 | 0.002463 | 3.791349 | Chchd3   |
| 32431 | -1.41212 | 11.82437 | -4.81006 | 0.000183 | 0.006244 | 0.927074 | Zfp706   |
| 62541 | -1.41218 | 10.86812 | -4.51824 | 0.000335 | 0.007855 | 0.348128 | Nqo2     |
| 38378 | -1.41225 | 8.954387 | -5.18935 | 8.43E-05 | 0.005132 | 1.666268 | Hdac9    |
| 52849 | -1.41243 | 10.28523 | -5.6548  | 3.34E-05 | 0.003769 | 2.548727 | Ppp1r3a  |
| 57197 | -1.41286 | 9.92007  | -4.58913 | 0.000289 | 0.007384 | 0.489472 | Rasl12   |
| 28077 | -1.4132  | 15.13935 | -6.74113 | 4.29E-06 | 0.002346 | 4.485666 | Cox7c    |
| 8742  | -1.41329 | 9.827552 | -4.82686 | 0.000177 | 0.006166 | 0.960149 | Mccc1    |
| 50673 | -1.41347 | 9.713534 | -5.11371 | 9.82E-05 | 0.005435 | 1.520193 | Tmem135  |
| 46731 | -1.41438 | 10.36086 | -4.92758 | 0.000144 | 0.005891 | 1.157852 | Eif3i    |
| 33025 | -1.41442 | 9.743751 | -4.68031 | 0.000239 | 0.006939 | 0.670643 | Cenpa    |
| 30160 | -1.41535 | 11.56369 | -4.64212 | 0.000259 | 0.007218 | 0.594852 | Rdh14    |
| 21682 | -1.41652 | 10.41311 | -5.33993 | 6.23E-05 | 0.004597 | 1.954931 | Herc3    |
| 36966 | -1.41777 | 12.42235 | -4.28831 | 0.000542 | 0.009554 | -0.1129  | Ptpla    |
| 11174 | -1.41781 | 15.8413  | -5.814   | 2.45E-05 | 0.00335  | 2.843681 | Atp5g2   |
| 52243 | -1.41804 | 9.508723 | -4.97921 | 0.000129 | 0.00578  | 1.258773 | Stat5a   |

|       |          |          |          |          |          |          |          |
|-------|----------|----------|----------|----------|----------|----------|----------|
| 19649 | -1.41825 | 11.98181 | -4.91253 | 0.000148 | 0.005914 | 1.128388 | Nup62    |
| 62797 | -1.42053 | 11.40697 | -4.6001  | 0.000282 | 0.007333 | 0.511312 | Nod1     |
| 6654  | -1.42122 | 11.1704  | -4.5621  | 0.000306 | 0.007566 | 0.435645 | Gcom1    |
| 59258 | -1.42237 | 11.85838 | -5.1399  | 9.32E-05 | 0.005346 | 1.570853 | Nfs1     |
| 22629 | -1.42314 | 10.97959 | -5.37942 | 5.76E-05 | 0.004414 | 2.030126 | Isca2    |
| 49781 | -1.4234  | 10.52414 | -5.17209 | 8.73E-05 | 0.005256 | 1.633002 | Asb14    |
| 56748 | -1.42355 | 10.24974 | -4.34706 | 0.000479 | 0.009113 | 0.005242 | Tmx4     |
| 12710 | -1.42386 | 10.53029 | -4.14619 | 0.000732 | 0.010607 | -0.39947 | Wif1     |
| 46027 | -1.42584 | 11.42183 | -3.91705 | 0.00119  | 0.012991 | -0.86311 | Laptm4a  |
| 15528 | -1.4259  | 13.45937 | -5.01841 | 0.000119 | 0.005671 | 1.335179 | Txlnb    |
| 15765 | -1.42762 | 8.577275 | -5.27291 | 7.12E-05 | 0.004827 | 1.826806 | Rnls     |
| 27924 | -1.42902 | 10.2753  | -4.74043 | 0.000211 | 0.006665 | 0.789668 | Snapc5   |
| 23775 | -1.42924 | 10.23622 | -2.84603 | 0.011513 | 0.044222 | -3.00403 | Angptl4  |
| 11323 | -1.42945 | 11.29736 | -4.68252 | 0.000238 | 0.006925 | 0.675013 | Tmem159  |
| 51254 | -1.42957 | 9.298009 | -4.72069 | 0.00022  | 0.006777 | 0.750616 | Alox5    |
| 14973 | -1.42991 | 8.218263 | -4.58489 | 0.000291 | 0.007427 | 0.481048 | Tmem35   |
| 13162 | -1.43043 | 11.82194 | -4.64117 | 0.000259 | 0.007218 | 0.592973 | Larp1b   |
| 52154 | -1.43047 | 12.4519  | -4.91827 | 0.000146 | 0.005905 | 1.139627 | Tmem106b |
| 42146 | -1.43096 | 11.16625 | -5.11431 | 9.81E-05 | 0.005435 | 1.521369 | Ube2e3   |
| 3299  | -1.43236 | 13.1374  | -5.59495 | 3.75E-05 | 0.0039   | 2.43691  | Adk      |
| 15778 | -1.43237 | 10.52954 | -4.88607 | 0.000156 | 0.005925 | 1.076508 | Akap1    |
| 62595 | -1.43243 | 9.126505 | -4.09823 | 0.00081  | 0.011112 | -0.49638 | Figl     |
| 28278 | -1.43248 | 12.1479  | -5.21376 | 8.02E-05 | 0.004967 | 1.713267 | Ccbl1    |
| 57890 | -1.43267 | 10.37766 | -4.24068 | 0.0006   | 0.009984 | -0.20884 | Ccdc90b  |
| 50295 | -1.43435 | 10.52782 | -4.93363 | 0.000142 | 0.005859 | 1.169687 | Glrx     |
| 21383 | -1.43448 | 14.71661 | -6.79194 | 3.92E-06 | 0.002278 | 4.571807 | Nnt      |

|       |          |          |          |          |          |          |          |
|-------|----------|----------|----------|----------|----------|----------|----------|
| 61900 | -1.43485 | 10.19916 | -5.03099 | 0.000116 | 0.005645 | 1.359668 | Pxmp4    |
| 2743  | -1.43555 | 10.14682 | -3.9007  | 0.001232 | 0.013196 | -0.89624 | Hist3h2a |
| 37140 | -1.43734 | 9.229171 | -5.37658 | 5.79E-05 | 0.004414 | 2.024736 | As3mt    |
| 49901 | -1.44041 | 9.911902 | -5.54449 | 4.15E-05 | 0.00398  | 2.342247 | Ppif     |
| 16226 | -1.44106 | 12.30367 | -5.25147 | 7.44E-05 | 0.004878 | 1.785696 | Spop     |
| 11622 | -1.44177 | 11.39294 | -3.97832 | 0.001045 | 0.012301 | -0.73901 | Trim11   |
| 25029 | -1.44234 | 10.35324 | -5.29578 | 6.80E-05 | 0.004788 | 1.870587 | Hand2    |
| 9173  | -1.4429  | 10.06372 | -4.33841 | 0.000488 | 0.009154 | -0.01214 | Ube2n    |
| 2731  | -1.44363 | 8.435335 | -4.76623 | 0.0002   | 0.006541 | 0.840639 | Ntf3     |
| 3729  | -1.44405 | 14.0276  | -5.27271 | 7.13E-05 | 0.004827 | 1.826422 | Ndufb6   |
| 37566 | -1.44446 | 10.24464 | -4.69522 | 0.000232 | 0.006885 | 0.700183 | Ccl27a   |
| 29419 | -1.44486 | 12.69344 | -4.80912 | 0.000183 | 0.006246 | 0.925234 | Phb2     |
| 412   | -1.4511  | 11.22656 | -4.03497 | 0.000926 | 0.011716 | -0.62433 | Pdlim4   |
| 24851 | -1.45175 | 12.5417  | -6.01279 | 1.67E-05 | 0.002891 | 3.206757 | Immt     |
| 9881  | -1.45292 | 9.509397 | -5.17374 | 8.70E-05 | 0.005252 | 1.636187 | Chac2    |
| 1911  | -1.45327 | 14.05982 | -5.32303 | 6.44E-05 | 0.00467  | 1.92268  | Mtftp1   |
| 56254 | -1.4539  | 11.5273  | -5.75127 | 2.76E-05 | 0.003584 | 2.727892 | Ank      |
| 45735 | -1.45543 | 12.05205 | -4.68957 | 0.000234 | 0.006899 | 0.688987 | Cish     |
| 2563  | -1.45649 | 9.39128  | -5.1634  | 8.88E-05 | 0.005274 | 1.616236 | Ttc30b   |
| 51236 | -1.45721 | 10.67688 | -5.19362 | 8.36E-05 | 0.005108 | 1.674496 | Mapk10   |
| 59775 | -1.45798 | 8.409523 | -3.79599 | 0.00154  | 0.014558 | -1.1084  | Ppl      |
| 35237 | -1.45832 | 12.3425  | -4.9562  | 0.000135 | 0.005828 | 1.213828 | Mrpl15   |
| 17799 | -1.45902 | 13.95474 | -5.65268 | 3.35E-05 | 0.003769 | 2.544774 | Dgat2    |
| 41696 | -1.45919 | 11.09495 | -5.3915  | 5.62E-05 | 0.004397 | 2.053104 | Rtn2     |
| 62615 | -1.46043 | 12.21253 | -4.94898 | 0.000137 | 0.005859 | 1.199707 | Isca1    |
| 26864 | -1.4609  | 11.36241 | -5.13428 | 9.42E-05 | 0.005379 | 1.560002 | Oat      |



|       |          |          |          |          |          |          |          |
|-------|----------|----------|----------|----------|----------|----------|----------|
| 26573 | -1.46398 | 9.595879 | -5.38577 | 5.68E-05 | 0.00441  | 2.042216 | Mrpl37   |
| 38104 | -1.46592 | 12.21456 | -5.57456 | 3.91E-05 | 0.003951 | 2.398714 | Mut      |
| 14013 | -1.46621 | 10.43516 | -5.20287 | 8.20E-05 | 0.005036 | 1.692309 | Bcap29   |
| 26584 | -1.46707 | 11.47464 | -4.83496 | 0.000174 | 0.006133 | 0.97609  | Atad1    |
| 51352 | -1.4677  | 10.11195 | -4.5562  | 0.000309 | 0.007591 | 0.423866 | Polr2d   |
| 42269 | -1.46961 | 10.53663 | -4.5354  | 0.000323 | 0.007678 | 0.382398 | Rpa3     |
| 47434 | -1.47222 | 10.72047 | -5.00195 | 0.000123 | 0.005707 | 1.303121 | Plekh3   |
| 32475 | -1.47323 | 12.05161 | -4.50165 | 0.000347 | 0.007904 | 0.315008 | Itpr2    |
| 48689 | -1.47339 | 11.21806 | -5.02749 | 0.000117 | 0.005645 | 1.352848 | Acp6     |
| 54571 | -1.47488 | 11.10022 | -4.59617 | 0.000285 | 0.007333 | 0.503495 | Sar1b    |
| 104   | -1.47521 | 10.75973 | -4.53579 | 0.000323 | 0.007678 | 0.383167 | Tm2d1    |
| 19771 | -1.47712 | 11.77916 | -4.62511 | 0.000268 | 0.007229 | 0.561063 | Chpt1    |
| 21702 | -1.47772 | 9.554251 | -5.31021 | 6.61E-05 | 0.004733 | 1.898181 | Tom111   |
| 39457 | -1.47787 | 13.39206 | -5.41586 | 5.35E-05 | 0.004377 | 2.099349 | Agpat3   |
| 25693 | -1.47817 | 8.711781 | -3.88005 | 0.001288 | 0.013363 | -0.93807 | Mnda     |
| 59299 | -1.47967 | 12.29946 | -4.95767 | 0.000135 | 0.005828 | 1.216703 | Coq2     |
| 62933 | -1.48092 | 11.5634  | -6.17295 | 1.23E-05 | 0.002798 | 3.494976 | Abcb8    |
| 10842 | -1.48094 | 11.26864 | -4.91194 | 0.000148 | 0.005914 | 1.12722  | Frmd5    |
| 424   | -1.48136 | 11.09862 | -4.14333 | 0.000736 | 0.010629 | -0.40525 | Aldh2    |
| 40525 | -1.48377 | 9.422393 | -4.33891 | 0.000488 | 0.009152 | -0.01115 | Heyl     |
| 20740 | -1.48417 | 11.34982 | -5.00149 | 0.000123 | 0.005707 | 1.30222  | Nudt6    |
| 62664 | -1.48433 | 12.28273 | -4.63183 | 0.000264 | 0.007219 | 0.574403 | Igsf1    |
| 62112 | -1.48442 | 9.896378 | -4.32403 | 0.000503 | 0.009325 | -0.04105 | Gm889    |
| 20929 | -1.48455 | 9.860341 | -5.47701 | 4.74E-05 | 0.004178 | 2.215114 | AI464131 |
| 31166 | -1.48528 | 8.578467 | -5.6024  | 3.70E-05 | 0.0039   | 2.450863 | Oma1     |
| 42504 | -1.48555 | 10.78867 | -5.53406 | 4.23E-05 | 0.003987 | 2.322653 | Ldhd     |

|       |          |          |          |          |          |          |          |
|-------|----------|----------|----------|----------|----------|----------|----------|
| 183   | -1.48666 | 10.73022 | -4.57997 | 0.000294 | 0.007457 | 0.471243 | Csfl     |
| 1487  | -1.48863 | 9.329255 | -5.99434 | 1.73E-05 | 0.002891 | 3.173295 | Slc25a29 |
| 56157 | -1.4892  | 12.27279 | -5.18183 | 8.56E-05 | 0.005182 | 1.651781 | Agl      |
| 61737 | -1.49001 | 13.47168 | -6.02417 | 1.63E-05 | 0.002891 | 3.227363 | Fhod3    |
| 18759 | -1.49037 | 12.88091 | -5.52521 | 4.31E-05 | 0.00399  | 2.305995 | Gm561    |
| 7866  | -1.49249 | 10.8618  | -4.58464 | 0.000292 | 0.007427 | 0.480541 | Irs1     |
| 5861  | -1.49253 | 12.97224 | -4.36848 | 0.000458 | 0.008954 | 0.048252 | Fam36a   |
| 37373 | -1.49267 | 8.565414 | -5.59271 | 3.77E-05 | 0.0039   | 2.432732 | Dok7     |
| 5663  | -1.49272 | 12.32409 | -5.0524  | 0.000111 | 0.005572 | 1.401292 | Dld      |
| 2762  | -1.49311 | 12.68582 | -5.55922 | 4.03E-05 | 0.003964 | 2.369927 | Msrp2    |
| 14604 | -1.49355 | 12.25804 | -4.96396 | 0.000133 | 0.005828 | 1.228994 | Sqrdl    |
| 5834  | -1.49389 | 9.622373 | -4.06471 | 0.00087  | 0.011417 | -0.56416 | Art4     |
| 53634 | -1.4974  | 12.89805 | -6.62389 | 5.32E-06 | 0.002346 | 4.285346 | Aldh6a1  |
| 60278 | -1.49861 | 10.95829 | -4.87013 | 0.000161 | 0.006012 | 1.04523  | Elmod3   |
| 5317  | -1.49895 | 13.54437 | -5.60398 | 3.69E-05 | 0.0039   | 2.453815 | Ndufa10  |
| 29603 | -1.49898 | 9.679488 | -4.81612 | 0.00018  | 0.006205 | 0.939019 | Reep1    |
| 36019 | -1.49972 | 14.71431 | -5.78604 | 2.58E-05 | 0.00346  | 2.792141 | Idh3b    |
| 18073 | -1.49999 | 7.786052 | -4.34019 | 0.000486 | 0.009137 | -0.00856 | Aqp4     |
| 35654 | -1.50026 | 12.52679 | -4.8061  | 0.000184 | 0.006267 | 0.919278 | Pop5     |
| 28211 | -1.50032 | 9.742293 | -5.27558 | 7.09E-05 | 0.004827 | 1.831926 | Tfb1m    |
| 14671 | -1.50121 | 14.2592  | -5.9942  | 1.73E-05 | 0.002891 | 3.173036 | Acsl1    |
| 62354 | -1.50124 | 13.2853  | -6.12684 | 1.34E-05 | 0.002798 | 3.412379 | Mrps28   |
| 34312 | -1.50384 | 11.76304 | -5.56531 | 3.98E-05 | 0.003964 | 2.381348 | Coq9     |
| 22558 | -1.50651 | 9.578643 | -5.25643 | 7.36E-05 | 0.004873 | 1.795221 | Rpsd4    |
| 13538 | -1.50745 | 14.42257 | -6.15411 | 1.27E-05 | 0.002798 | 3.461262 | Fndc5    |
| 39482 | -1.50813 | 9.97464  | -6.27185 | 1.02E-05 | 0.002528 | 3.670993 | Agtr1a   |

|       |          |          |          |          |          |          |         |
|-------|----------|----------|----------|----------|----------|----------|---------|
| 30074 | -1.50882 | 13.58949 | -5.53812 | 4.20E-05 | 0.00398  | 2.330282 | Hopx    |
| 13984 | -1.5095  | 13.02193 | -5.64266 | 3.42E-05 | 0.003805 | 2.526094 | Ccng1   |
| 18362 | -1.51005 | 9.794941 | -6.12069 | 1.36E-05 | 0.002798 | 3.401352 | Dusp7   |
| 17120 | -1.51044 | 11.75696 | -5.0592  | 0.00011  | 0.005572 | 1.414511 | Ghr     |
| 43962 | -1.51065 | 10.49204 | -6.35794 | 8.69E-06 | 0.002463 | 3.823006 | Acadsb  |
| 35616 | -1.51139 | 9.640669 | -5.39384 | 5.59E-05 | 0.004397 | 2.057549 | Pdp2    |
| 3456  | -1.51317 | 11.46723 | -5.36869 | 5.88E-05 | 0.004449 | 2.009716 | Klhl30  |
| 58991 | -1.51333 | 8.663875 | -6.1325  | 1.33E-05 | 0.002798 | 3.422534 | Prrg1   |
| 44566 | -1.51341 | 12.93376 | -4.84311 | 0.000171 | 0.006133 | 0.99212  | Abcd3   |
| 35282 | -1.51374 | 11.0825  | -5.69705 | 3.07E-05 | 0.003721 | 2.627368 | Kptn    |
| 56975 | -1.51441 | 11.60796 | -4.72868 | 0.000216 | 0.006719 | 0.766431 | Cln3    |
| 26485 | -1.51594 | 11.49391 | -5.32808 | 6.38E-05 | 0.004669 | 1.932309 | Hhatl   |
| 4992  | -1.51697 | 7.804497 | -4.21274 | 0.000636 | 0.0101   | -0.26515 | Kcna1   |
| 50308 | -1.51922 | 12.03281 | -5.5619  | 4.01E-05 | 0.003964 | 2.374957 | Mrpl42  |
| 1698  | -1.52033 | 12.94525 | -5.36481 | 5.93E-05 | 0.004457 | 2.002325 | Fkbp3   |
| 60434 | -1.52103 | 10.76165 | -4.86629 | 0.000163 | 0.006036 | 1.037686 | Dip2c   |
| 54100 | -1.52132 | 13.07983 | -6.05087 | 1.55E-05 | 0.002865 | 3.275632 | Ndufs8  |
| 62669 | -1.52236 | 7.420659 | -3.02658 | 0.00789  | 0.03472  | -2.65192 | Upk3b   |
| 51362 | -1.52274 | 10.19716 | -4.88284 | 0.000157 | 0.005925 | 1.070167 | Zfp467  |
| 44891 | -1.52442 | 9.18991  | -5.53129 | 4.26E-05 | 0.00399  | 2.317431 | Kcnh2   |
| 34422 | -1.52467 | 9.852186 | -5.04095 | 0.000114 | 0.00564  | 1.379045 | Mmgt1   |
| 46587 | -1.52555 | 10.12692 | -5.25779 | 7.34E-05 | 0.004873 | 1.797821 | Gzmm    |
| 59750 | -1.52571 | 10.28941 | -4.88029 | 0.000158 | 0.005925 | 1.065176 | Lnpep   |
| 35735 | -1.52926 | 11.47719 | -5.80133 | 2.51E-05 | 0.003391 | 2.820331 | Ccbl2   |
| 4807  | -1.53023 | 9.71162  | -5.49267 | 4.59E-05 | 0.004091 | 2.244677 | Chordc1 |
| 8622  | -1.53112 | 12.96376 | -4.78106 | 0.000194 | 0.006401 | 0.869914 | Apoo    |

|       |          |          |          |          |          |          |          |
|-------|----------|----------|----------|----------|----------|----------|----------|
| 49340 | -1.53217 | 11.25448 | -5.40196 | 5.50E-05 | 0.004397 | 2.072977 | Tmtc1    |
| 41407 | -1.53232 | 13.23306 | -6.69193 | 4.70E-06 | 0.002346 | 4.401865 | Mgst3    |
| 37837 | -1.53288 | 9.796742 | -5.14754 | 9.17E-05 | 0.00532  | 1.585619 | Gmpr     |
| 42208 | -1.53371 | 9.40227  | -4.56034 | 0.000307 | 0.007568 | 0.432133 | Blnk     |
| 23831 | -1.53491 | 10.10685 | -5.42019 | 5.31E-05 | 0.004364 | 2.107567 | Efcab2   |
| 48725 | -1.5365  | 13.228   | -4.13843 | 0.000744 | 0.010683 | -0.41515 | Dbp      |
| 1732  | -1.53795 | 10.46347 | -4.08522 | 0.000833 | 0.011248 | -0.52268 | Ddo      |
| 28588 | -1.5387  | 11.24534 | -5.35177 | 6.08E-05 | 0.004544 | 1.977497 | Tmem50b  |
| 47913 | -1.53896 | 13.17682 | -5.6578  | 3.32E-05 | 0.003769 | 2.554325 | Hspe1    |
| 6513  | -1.53992 | 10.60514 | -4.35446 | 0.000472 | 0.009074 | 0.020109 | Hsd11b1  |
| 48624 | -1.5409  | 11.10645 | -5.16101 | 8.93E-05 | 0.005274 | 1.611625 | Osgepl1  |
| 28693 | -1.54112 | 10.37393 | -5.8108  | 2.46E-05 | 0.00335  | 2.837787 | Pcca     |
| 39012 | -1.54427 | 8.945415 | -4.7998  | 0.000187 | 0.006267 | 0.906866 | Tbc1d10c |
| 44048 | -1.54462 | 11.20974 | -4.89898 | 0.000152 | 0.005922 | 1.101819 | Slc25a38 |
| 38196 | -1.54496 | 11.05239 | -5.24401 | 7.55E-05 | 0.004894 | 1.771389 | Maob     |
| 3168  | -1.54561 | 12.40313 | -4.57302 | 0.000299 | 0.007471 | 0.457405 | Camk2g   |
| 49854 | -1.54584 | 10.52771 | -5.81332 | 2.45E-05 | 0.00335  | 2.842428 | Bcl2l13  |
| 44846 | -1.54663 | 14.72346 | -7.417   | 1.30E-06 | 0.001253 | 5.598617 | Fhl      |
| 31565 | -1.5469  | 11.55127 | -5.40055 | 5.52E-05 | 0.004397 | 2.070294 | Akr1b10  |
| 41401 | -1.54692 | 9.998018 | -5.34917 | 6.11E-05 | 0.004552 | 1.972549 | Wdr33    |
| 41655 | -1.54698 | 8.441338 | -5.10622 | 9.97E-05 | 0.005451 | 1.50569  | Adamts15 |
| 61597 | -1.54826 | 12.03098 | -5.10204 | 0.000101 | 0.00546  | 1.497592 | Bves     |
| 23339 | -1.54832 | 11.02035 | -6.28911 | 9.89E-06 | 0.002476 | 3.701567 | Atp2a1   |
| 17142 | -1.54856 | 13.48962 | -4.65845 | 0.00025  | 0.007074 | 0.62727  | Hspd1    |
| 21594 | -1.54955 | 7.512729 | -3.99077 | 0.001018 | 0.012116 | -0.7138  | Ccl11    |
| 52072 | -1.5505  | 12.5042  | -5.01372 | 0.00012  | 0.005671 | 1.326047 | Rdm1     |

|       |          |          |          |          |          |          |         |
|-------|----------|----------|----------|----------|----------|----------|---------|
| 45795 | -1.55068 | 11.64267 | -5.99049 | 1.74E-05 | 0.002891 | 3.166306 | Tmem70  |
| 14719 | -1.5533  | 9.840662 | -4.51198 | 0.000339 | 0.007886 | 0.335643 | Pcmtd2  |
| 30508 | -1.55378 | 12.37867 | -5.93577 | 1.93E-05 | 0.003017 | 3.066768 | Ephx2   |
| 37771 | -1.55454 | 8.53777  | -3.44383 | 0.00326  | 0.021057 | -1.82033 | Efemp1  |
| 32184 | -1.5583  | 9.483774 | -5.9917  | 1.74E-05 | 0.002891 | 3.168501 | Tmx1    |
| 60714 | -1.55936 | 10.43302 | -5.46337 | 4.87E-05 | 0.004209 | 2.189336 | Tfam    |
| 38721 | -1.56475 | 9.559228 | -6.29209 | 9.83E-06 | 0.002476 | 3.706846 | Ankrd32 |
| 2218  | -1.5648  | 11.37052 | -4.88299 | 0.000157 | 0.005925 | 1.070463 | Lrrc14b |
| 15668 | -1.57138 | 11.99299 | -4.71912 | 0.00022  | 0.006778 | 0.747512 | Dcun1d2 |
| 15946 | -1.57487 | 9.471999 | -4.28255 | 0.000549 | 0.009571 | -0.1245  | Lamb3   |
| 20006 | -1.57528 | 12.73443 | -5.57946 | 3.87E-05 | 0.003938 | 2.407905 | Pdha1   |
| 57620 | -1.57985 | 11.61117 | -4.89464 | 0.000154 | 0.005923 | 1.093314 | Mapk14  |
| 19663 | -1.58032 | 13.34705 | -5.49365 | 4.59E-05 | 0.004091 | 2.246526 | Peci    |
| 11560 | -1.58086 | 14.3113  | -5.50721 | 4.46E-05 | 0.004091 | 2.272096 | Acsl1   |
| 28304 | -1.58095 | 15.37405 | -6.5997  | 5.56E-06 | 0.002346 | 4.243747 | Acadm   |
| 45071 | -1.58355 | 13.48359 | -5.74288 | 2.81E-05 | 0.003622 | 2.712357 | Rit1    |
| 28266 | -1.58419 | 12.08947 | -5.56248 | 4.00E-05 | 0.003964 | 2.376036 | Ifngr2  |
| 32268 | -1.58481 | 8.751371 | -5.22774 | 7.80E-05 | 0.004955 | 1.740148 | Meig1   |
| 52198 | -1.58817 | 11.89584 | -4.69621 | 0.000231 | 0.006885 | 0.702158 | Cacybp  |
| 5257  | -1.5884  | 11.26476 | -5.92596 | 1.97E-05 | 0.003017 | 3.048889 | Gpt     |
| 8375  | -1.59457 | 11.48897 | -5.27281 | 7.13E-05 | 0.004827 | 1.826624 | Ppip5k2 |
| 6808  | -1.59471 | 10.72269 | -4.27501 | 0.000558 | 0.009625 | -0.13967 | Gstt1   |
| 50000 | -1.5967  | 10.86787 | -5.1306  | 9.49E-05 | 0.005402 | 1.55288  | Tbc1d4  |
| 21446 | -1.60583 | 9.858634 | -5.32638 | 6.40E-05 | 0.004669 | 1.929061 | Unc45b  |
| 4489  | -1.60645 | 10.21174 | -8.30361 | 2.97E-07 | 0.000595 | 6.952157 | Actr3b  |
| 6504  | -1.61057 | 10.62167 | -4.46563 | 0.000374 | 0.008171 | 0.24297  | Pla2g5  |

|       |          |          |          |          |          |          |         |
|-------|----------|----------|----------|----------|----------|----------|---------|
| 44626 | -1.61108 | 12.84586 | -6.26086 | 1.04E-05 | 0.002553 | 3.651506 | Ryr2    |
| 49578 | -1.61222 | 10.67876 | -6.06873 | 1.50E-05 | 0.002865 | 3.307856 | Cited4  |
| 27254 | -1.61237 | 13.28823 | -5.75761 | 2.73E-05 | 0.003561 | 2.739615 | Gfm1    |
| 45427 | -1.61586 | 8.261361 | -6.14671 | 1.29E-05 | 0.002798 | 3.44802  | Ccdc69  |
| 599   | -1.6167  | 10.51077 | -5.38902 | 5.65E-05 | 0.004397 | 2.048391 | Zfyve21 |
| 62133 | -1.61716 | 10.82157 | -4.60441 | 0.00028  | 0.007327 | 0.519883 | Rcor2   |
| 23035 | -1.61916 | 10.30078 | -5.09613 | 0.000102 | 0.005481 | 1.486154 | Gcat    |
| 33789 | -1.62198 | 9.385721 | -6.9571  | 2.91E-06 | 0.001944 | 4.84905  | Schip1  |
| 36458 | -1.62339 | 9.759183 | -6.04495 | 1.57E-05 | 0.002865 | 3.264942 | Fam78a  |
| 27814 | -1.62442 | 13.29098 | -6.46435 | 7.13E-06 | 0.002346 | 4.009309 | Auh     |
| 50765 | -1.62543 | 12.56899 | -5.14061 | 9.30E-05 | 0.005346 | 1.572223 | Entpd5  |
| 49685 | -1.62757 | 13.06643 | -6.0969  | 1.42E-05 | 0.002822 | 3.358595 | Pcp4l1  |
| 41081 | -1.62867 | 10.50866 | -7.30369 | 1.58E-06 | 0.001432 | 5.416995 | Tmod4   |
| 39732 | -1.62933 | 7.96266  | -5.1476  | 9.17E-05 | 0.00532  | 1.585735 | Fbp2    |
| 1818  | -1.63005 | 10.52091 | -6.05567 | 1.54E-05 | 0.002865 | 3.284301 | Pkia    |
| 32774 | -1.63198 | 9.099509 | -4.49994 | 0.000348 | 0.007904 | 0.311591 | ErbB4   |
| 19521 | -1.63365 | 14.02885 | -5.92589 | 1.97E-05 | 0.003017 | 3.048753 | Plin5   |
| 38740 | -1.63382 | 9.824129 | -6.03819 | 1.59E-05 | 0.002871 | 3.252711 | Ttc32   |
| 18714 | -1.63406 | 12.22717 | -5.78159 | 2.61E-05 | 0.00346  | 2.783917 | Fam174b |
| 60765 | -1.63605 | 11.56545 | -5.89304 | 2.10E-05 | 0.003091 | 2.988737 | Nudt7   |
| 33070 | -1.63911 | 11.4178  | -4.81642 | 0.00018  | 0.006205 | 0.939598 | Gypc    |
| 26956 | -1.64168 | 8.758386 | -6.68902 | 4.72E-06 | 0.002346 | 4.396885 | Acot2   |
| 27391 | -1.64493 | 10.02857 | -4.71543 | 0.000222 | 0.006801 | 0.740218 | Mmd     |
| 8825  | -1.64558 | 10.6057  | -4.90925 | 0.000149 | 0.005914 | 1.121953 | Uros    |
| 2016  | -1.64634 | 11.58627 | -5.21901 | 7.94E-05 | 0.004967 | 1.723367 | Tmem65  |
| 57306 | -1.6476  | 14.75804 | -6.41071 | 7.88E-06 | 0.002382 | 3.915616 | Ecil    |

|       |          |          |          |          |          |          |              |
|-------|----------|----------|----------|----------|----------|----------|--------------|
| 25369 | -1.64827 | 9.704746 | -5.87381 | 2.18E-05 | 0.00314  | 2.95352  | Dhrs4        |
| 38643 | -1.64978 | 13.34869 | -4.29309 | 0.000537 | 0.009527 | -0.10329 | Pdk4         |
| 43108 | -1.65128 | 8.595737 | -2.77187 | 0.013431 | 0.048675 | -3.14677 | Apoc1        |
| 56237 | -1.65438 | 8.793869 | -5.82661 | 2.39E-05 | 0.003341 | 2.866874 | LOC100502705 |
| 4792  | -1.6564  | 15.21039 | -6.09957 | 1.41E-05 | 0.002822 | 3.363391 | Decr1        |
| 60495 | -1.65666 | 11.70956 | -6.35971 | 8.66E-06 | 0.002463 | 3.826115 | Amacr        |
| 61508 | -1.65926 | 11.59778 | -5.82501 | 2.40E-05 | 0.003341 | 2.863941 | Pex11a       |
| 32400 | -1.65953 | 11.06317 | -5.05575 | 0.00011  | 0.005572 | 1.4078   | Mrm1         |
| 5030  | -1.66336 | 13.12915 | -5.65363 | 3.35E-05 | 0.003769 | 2.546546 | Mlycd        |
| 43464 | -1.66427 | 10.53045 | -4.9534  | 0.000136 | 0.005848 | 1.208364 | Tspan18      |
| 45727 | -1.67089 | 7.894218 | -4.50275 | 0.000346 | 0.007904 | 0.317198 | Slc38a5      |
| 21092 | -1.67165 | 11.23305 | -5.40202 | 5.50E-05 | 0.004397 | 2.073093 | Tmem126a     |
| 12430 | -1.67238 | 14.07433 | -5.99817 | 1.72E-05 | 0.002891 | 3.180244 | Etfdh        |
| 47474 | -1.67251 | 12.27016 | -5.98815 | 1.75E-05 | 0.002891 | 3.162067 | Slc25a42     |
| 53146 | -1.67361 | 9.369377 | -6.50974 | 6.56E-06 | 0.002346 | 4.088253 | Atg10        |
| 4085  | -1.67371 | 11.81808 | -5.07713 | 0.000106 | 0.005504 | 1.449315 | Yipf7        |
| 5530  | -1.67579 | 13.31883 | -4.9686  | 0.000132 | 0.005817 | 1.238044 | Cpt2         |
| 51528 | -1.67733 | 9.412687 | -5.4553  | 4.95E-05 | 0.004211 | 2.174062 | Adrb1        |
| 47289 | -1.68062 | 10.38454 | -6.30189 | 9.65E-06 | 0.002476 | 3.724166 | Agpat9       |
| 25436 | -1.68222 | 8.86688  | -6.58194 | 5.74E-06 | 0.002346 | 4.213148 | Il15         |
| 48325 | -1.68235 | 11.5673  | -5.94979 | 1.88E-05 | 0.002985 | 3.092317 | Nampt        |
| 44094 | -1.68278 | 9.750779 | -5.21462 | 8.01E-05 | 0.004967 | 1.714914 | Arl4d        |
| 22207 | -1.69242 | 9.908921 | -3.17435 | 0.005777 | 0.028954 | -2.35975 | Plagl1       |
| 5364  | -1.69706 | 8.532781 | -5.25715 | 7.35E-05 | 0.004873 | 1.796602 | Aldh1a2      |
| 5680  | -1.7007  | 10.48002 | -4.0489  | 0.0009   | 0.011533 | -0.59615 | Psd3         |
| 60658 | -1.70341 | 11.0853  | -5.01354 | 0.00012  | 0.005671 | 1.325701 | Leprel4      |

|       |          |          |          |          |          |          |          |
|-------|----------|----------|----------|----------|----------|----------|----------|
| 35668 | -1.70498 | 11.24023 | -4.41951 | 0.000412 | 0.008563 | 0.150613 | Sox4     |
| 36071 | -1.70602 | 9.131936 | -4.14665 | 0.000731 | 0.010607 | -0.39855 | Casq1    |
| 61718 | -1.70634 | 10.02511 | -7.0443  | 2.49E-06 | 0.001942 | 4.993703 | Apobec2  |
| 30311 | -1.71162 | 13.46802 | -5.86862 | 2.20E-05 | 0.003151 | 2.944012 | Slc25a34 |
| 4718  | -1.71204 | 9.471522 | -4.08155 | 0.000839 | 0.011264 | -0.53011 | Itm2a    |
| 25006 | -1.715   | 8.262396 | -5.37794 | 5.77E-05 | 0.004414 | 2.027326 | Cacna1g  |
| 49579 | -1.71698 | 10.10268 | -5.72269 | 2.92E-05 | 0.003693 | 2.674952 | Lpin1    |
| 47223 | -1.71959 | 12.97694 | -5.29295 | 6.84E-05 | 0.004788 | 1.865173 | Plbd1    |
| 57143 | -1.72194 | 9.668839 | -5.61769 | 3.59E-05 | 0.003898 | 2.479467 | Ppm1k    |
| 3690  | -1.72518 | 9.91569  | -4.81949 | 0.000179 | 0.006189 | 0.94564  | Ppp1r3d  |
| 33128 | -1.72639 | 10.42278 | -6.0445  | 1.57E-05 | 0.002865 | 3.264128 | Retsat   |
| 36941 | -1.73049 | 8.069063 | -3.03398 | 0.007768 | 0.034426 | -2.63737 | Cyp2s1   |
| 1871  | -1.73186 | 8.869191 | -9.29633 | 6.39E-08 | 0.000352 | 8.331531 | Ctfl     |
| 62074 | -1.73786 | 15.65045 | -7.51172 | 1.10E-06 | 0.001159 | 5.748933 | Acaa2    |
| 46874 | -1.73983 | 12.59787 | -5.65378 | 3.34E-05 | 0.003769 | 2.546835 | Dnaja1   |
| 12417 | -1.74176 | 11.20282 | -5.12212 | 9.66E-05 | 0.005429 | 1.536482 | Reep5    |
| 40017 | -1.74334 | 9.184212 | -5.90645 | 2.05E-05 | 0.003048 | 3.013247 | Foxo6    |
| 24047 | -1.75101 | 12.60602 | -6.31602 | 9.40E-06 | 0.002466 | 3.749124 | Bckdhb   |
| 57010 | -1.75241 | 10.46499 | -5.12771 | 9.55E-05 | 0.005402 | 1.547295 | Dnmt3a   |
| 33769 | -1.75303 | 11.99214 | -5.93638 | 1.93E-05 | 0.003017 | 3.06789  | Mlfl     |
| 62069 | -1.75594 | 11.10961 | -5.60361 | 3.69E-05 | 0.0039   | 2.453126 | Lym5     |
| 62293 | -1.75772 | 9.87856  | -6.13424 | 1.32E-05 | 0.002798 | 3.425654 | Slc25a20 |
| 38934 | -1.76424 | 11.40946 | -5.8888  | 2.12E-05 | 0.003091 | 2.980975 | Fam131a  |
| 17337 | -1.76647 | 12.88513 | -7.4137  | 1.31E-06 | 0.001253 | 5.593362 | Gm5595   |
| 1238  | -1.76842 | 9.842412 | -5.23365 | 7.71E-05 | 0.004951 | 1.751491 | Abhd1    |
| 8230  | -1.77132 | 9.788115 | -3.79045 | 0.001558 | 0.014596 | -1.11964 | Tbx5     |



|       |          |          |          |          |          |          |          |
|-------|----------|----------|----------|----------|----------|----------|----------|
| 51685 | -1.77264 | 8.098608 | -3.68494 | 0.001951 | 0.016103 | -1.33333 | Rspo1    |
| 13384 | -1.77386 | 10.51329 | -5.87708 | 2.17E-05 | 0.00314  | 2.959511 | Smtnl2   |
| 33250 | -1.78735 | 11.8957  | -5.53898 | 4.19E-05 | 0.00398  | 2.331898 | Rnf207   |
| 49863 | -1.78842 | 10.2521  | -7.65912 | 8.60E-07 | 0.001159 | 5.98008  | Fkbp4    |
| 10368 | -1.7901  | 8.954502 | -5.70382 | 3.03E-05 | 0.003713 | 2.639939 | Gm14492  |
| 7121  | -1.79455 | 11.07483 | -7.03286 | 2.54E-06 | 0.001942 | 4.974798 | Mif4gd   |
| 20404 | -1.79586 | 8.389867 | -5.18523 | 8.50E-05 | 0.00516  | 1.658331 | Kcnv2    |
| 46423 | -1.80407 | 10.49223 | -6.32646 | 9.22E-06 | 0.002463 | 3.767555 | Slc25a26 |
| 61709 | -1.80527 | 8.532154 | -3.26562 | 0.004761 | 0.025854 | -2.17786 | Fos      |
| 7341  | -1.81129 | 9.925557 | -5.7139  | 2.97E-05 | 0.003707 | 2.658656 | Lrrc3b   |
| 36833 | -1.81202 | 10.54078 | -5.58973 | 3.79E-05 | 0.0039   | 2.427143 | Mkks     |
| 28236 | -1.81628 | 10.34827 | -6.53204 | 6.29E-06 | 0.002346 | 4.126913 | Suclg2   |
| 12976 | -1.81841 | 11.79867 | -6.72764 | 4.40E-06 | 0.002346 | 4.462729 | Cmb1     |
| 18720 | -1.81905 | 14.44299 | -6.96484 | 2.87E-06 | 0.001944 | 4.861936 | Pln      |
| 1796  | -1.82582 | 7.997714 | -3.22055 | 0.005238 | 0.027383 | -2.26781 | Nkain4   |
| 18895 | -1.85008 | 10.20442 | -6.51341 | 6.51E-06 | 0.002346 | 4.094616 | Slc36a2  |
| 60864 | -1.8501  | 11.10869 | -6.60532 | 5.50E-06 | 0.002346 | 4.253425 | Crhr2    |
| 60310 | -1.85166 | 8.678187 | -5.99654 | 1.72E-05 | 0.002891 | 3.177281 | Itgb6    |
| 41816 | -1.85702 | 9.730978 | -6.37705 | 8.39E-06 | 0.002463 | 3.856598 | Impa2    |
| 62427 | -1.86269 | 10.08486 | -5.88863 | 2.12E-05 | 0.003091 | 2.980672 | Hfe2     |
| 56701 | -1.86281 | 11.64012 | -6.47032 | 7.05E-06 | 0.002346 | 4.019705 | Fyco1    |
| 48055 | -1.89115 | 9.412857 | -3.89352 | 0.001251 | 0.013205 | -0.91078 | Ppbp     |
| 36154 | -1.90057 | 12.18781 | -6.49399 | 6.75E-06 | 0.002346 | 4.060895 | Hsdl2    |
| 24508 | -1.90988 | 14.16924 | -7.58385 | 9.77E-07 | 0.001159 | 5.862455 | Ech1     |
| 16365 | -1.91022 | 12.89577 | -6.62027 | 5.35E-06 | 0.002346 | 4.279123 | Mid1ip1  |
| 1520  | -1.91029 | 9.890778 | -5.4149  | 5.36E-05 | 0.004377 | 2.097532 | Slc26a6  |

|       |          |          |          |          |          |          |         |
|-------|----------|----------|----------|----------|----------|----------|---------|
| 6069  | -1.91524 | 10.33247 | -3.53843 | 0.002665 | 0.018966 | -1.62959 | Dpt     |
| 3285  | -1.93699 | 10.34612 | -6.7145  | 4.51E-06 | 0.002346 | 4.440356 | P2ry1   |
| 26549 | -1.94198 | 12.26315 | -6.10939 | 1.39E-05 | 0.002822 | 3.381051 | Mitf    |
| 50713 | -1.96966 | 12.14898 | -5.91234 | 2.02E-05 | 0.003048 | 3.024022 | Gstk1   |
| 13753 | -1.97364 | 12.43893 | -7.1488  | 2.07E-06 | 0.001757 | 5.165488 | Rpl3l   |
| 1890  | -1.98332 | 9.635574 | -6.55505 | 6.03E-06 | 0.002346 | 4.16672  | Asb5    |
| 56206 | -2.01009 | 10.4205  | -4.57312 | 0.000299 | 0.007471 | 0.457601 | Dbh     |
| 29393 | -2.01067 | 10.24062 | -4.44361 | 0.000391 | 0.008366 | 0.198911 | Inmt    |
| 61703 | -2.01589 | 12.50746 | -6.24313 | 1.08E-05 | 0.00261  | 3.620039 | Trdn    |
| 46564 | -2.02017 | 8.748218 | -2.81542 | 0.01227  | 0.045912 | -3.06309 | Car3    |
| 57091 | -2.03619 | 13.65286 | -6.79021 | 3.93E-06 | 0.002278 | 4.568884 | Dhrs7c  |
| 44954 | -2.03716 | 12.16862 | -5.99041 | 1.74E-05 | 0.002891 | 3.166168 | Dnajb1  |
| 36866 | -2.04616 | 12.10173 | -7.54931 | 1.04E-06 | 0.001159 | 5.808195 | Rbfox1  |
| 38860 | -2.06155 | 11.63643 | -7.2881  | 1.62E-06 | 0.001432 | 5.391849 | Fitm1   |
| 58134 | -2.08948 | 8.907501 | -6.07995 | 1.47E-05 | 0.002865 | 3.328076 | Epha4   |
| 60277 | -2.13559 | 10.74043 | -4.73512 | 0.000213 | 0.006665 | 0.779177 | Lgals4  |
| 29187 | -2.18148 | 10.19913 | -6.85022 | 3.53E-06 | 0.002239 | 4.670132 | Kcnd2   |
| 62323 | -2.19028 | 9.479667 | -4.30833 | 0.00052  | 0.009396 | -0.07263 | Slc22a1 |
| 14790 | -2.20163 | 11.00686 | -6.10598 | 1.40E-05 | 0.002822 | 3.374926 | Kcnj5   |
| 5591  | -2.23418 | 11.00894 | -5.49816 | 4.55E-05 | 0.004091 | 2.255027 | Penk    |
| 39377 | -2.24455 | 8.938597 | -4.0468  | 0.000904 | 0.011557 | -0.60039 | Aldob   |
| 18419 | -2.25368 | 8.298277 | -3.39622 | 0.003608 | 0.022229 | -1.9161  | Muc16   |
| 2337  | -2.29512 | 10.64599 | -4.22815 | 0.000616 | 0.010087 | -0.23409 | Pfkfb1  |
| 56598 | -2.3298  | 11.17527 | -8.54539 | 2.02E-07 | 0.000445 | 7.300984 | Efnb3   |
| 42075 | -2.35523 | 11.7021  | -6.49371 | 6.75E-06 | 0.002346 | 4.060403 | Ano10   |
| 62398 | -2.38258 | 10.27594 | -5.42228 | 5.28E-05 | 0.004362 | 2.111538 | Angptl  |

|       |          |          |          |          |          |          |        |
|-------|----------|----------|----------|----------|----------|----------|--------|
| 16156 | -2.50344 | 10.53236 | -8.93006 | 1.11E-07 | 0.000409 | 7.83869  | G0s2   |
| 19496 | -2.52166 | 10.81939 | -6.62346 | 5.32E-06 | 0.002346 | 4.284608 | Ces1d  |
| 18121 | -2.56884 | 9.083365 | -3.03901 | 0.007686 | 0.034297 | -2.62748 | Cfd    |
| 14967 | -2.6053  | 12.27879 | -5.46395 | 4.86E-05 | 0.004209 | 2.190438 | Aqp1   |
| 10748 | -2.63345 | 9.588391 | -5.06972 | 0.000107 | 0.005555 | 1.43492  | Acot1  |
| 54909 | -2.78008 | 9.710497 | -6.6354  | 5.21E-06 | 0.002346 | 4.305108 | Retnla |
| 11380 | -3.12552 | 9.036671 | -4.24688 | 0.000592 | 0.009918 | -0.19635 | Msln   |

Sheet S2 The differentially expressed genes (DEGs) of pressure overload (PO)

| ID           | adj. <i>P</i> .Val | <i>P</i> .Value | t        | B        | logFC    | Gene.symbol |
|--------------|--------------------|-----------------|----------|----------|----------|-------------|
| ILMN_2625893 | 4.56E-05           | 1.55E-07        | 13.6958  | 8.099738 | 3.499986 | Ces1d       |
| ILMN_1214402 | 6.44E-06           | 5.69E-10        | 25.22372 | 13.03971 | 3.149162 | Wnk2        |
| ILMN_3139875 | 6.29E-05           | 3.39E-07        | 12.55281 | 7.333634 | 3.102932 | Acot1       |
| ILMN_2476329 | 1.98E-05           | 1.70E-08        | 17.46218 | 10.17938 | 3.019201 | Whrn        |
| ILMN_2644229 | 5.68E-06           | 3.00E-10        | 27.02079 | 13.52021 | 2.61044  | Kcnd2       |
| ILMN_2421890 | 0.000159           | 2.22E-06        | 10.14752 | 5.447442 | 2.55568  | Acacb       |
| ILMN_2588249 | 8.21E-05           | 6.22E-07        | 11.72701 | 6.731469 | 2.513091 | Plin4       |
| ILMN_2750912 | 0.000149           | 1.95E-06        | 10.29749 | 5.577587 | 2.4777   | Fyco1       |
| ILMN_2909238 | 0.002617           | 1.60E-04        | 6.039556 | 1.004214 | 2.472191 | Sptb        |
| ILMN_2710139 | 0.000252           | 5.02E-06        | 9.232003 | 4.610976 | 2.459956 | Ppargc1a    |
| ILMN_3134598 | 3.81E-05           | 9.92E-08        | 14.39073 | 8.53121  | 2.371887 | Pdp2        |
| ILMN_1229315 | 0.00174            | 9.23E-05        | 6.483259 | 1.580675 | 2.305932 | Tns1        |
| ILMN_2853957 | 0.000308           | 7.15E-06        | 8.856527 | 4.245647 | 2.30006  | Dag1        |
| ILMN_1235374 | 9.73E-06           | 2.67E-09        | 21.35305 | 11.79911 | 2.29782  | Decr1       |
| ILMN_1258086 | 0.000108           | 1.11E-06        | 10.98001 | 6.147368 | 2.275773 | Setd1b      |
| ILMN_2724545 | 0.000565           | 1.80E-05        | 7.937377 | 3.290734 | 2.274738 | Sbk1        |
| ILMN_2606973 | 3.87E-05           | 1.05E-07        | 14.29744 | 8.474696 | 2.244942 | Tmem201     |
| ILMN_2688415 | 3.78E-05           | 9.44E-08        | 14.46873 | 8.578142 | 2.233924 | Vwa8        |
| ILMN_1250469 | 0.003232           | 2.16E-04        | 5.804546 | 0.687756 | 2.203809 | Bcl9l       |
| ILMN_2634905 | 0.000272           | 5.71E-06        | 9.093842 | 4.47813  | 2.203534 | Fbp2        |
| ILMN_2665095 | 7.03E-05           | 4.24E-07        | 12.24306 | 7.112844 | 2.187733 | Casz1       |
| ILMN_2475156 | 0.02285            | 3.01E-03        | 3.961912 | -2.06541 | 2.168751 | Xist        |
| ILMN_1236136 | 2.97E-05           | 5.88E-08        | 15.24314 | 9.028547 | 2.153289 | Corin       |
| ILMN_2978040 | 0.003241           | 2.17E-04        | 5.799873 | 0.681384 | 2.145563 | Myh8        |
| ILMN_2855423 | 2.87E-05           | 5.04E-08        | 15.5035  | 9.173904 | 2.143011 | Ube3b       |
| ILMN_2427454 | 9.73E-06           | 2.42E-09        | 21.58112 | 11.88123 | 2.105052 | Npc1        |
| ILMN_2769795 | 0.0001             | 9.34E-07        | 11.19894 | 6.322664 | 2.058932 | Phkg1       |
| ILMN_2698757 | 2.79E-05           | 4.00E-08        | 15.90145 | 9.390474 | 2.053724 | Ppm1l       |
| ILMN_2716085 | 3.78E-05           | 9.63E-08        | 14.43645 | 8.558757 | 2.012081 | Pex6        |
| ILMN_2964785 | 0.000179           | 2.73E-06        | 9.908762 | 5.236368 | 2.005951 | Zfhx2       |
| ILMN_2710419 | 0.005484           | 4.52E-04        | 5.252232 | -0.08713 | 1.984573 | Plec        |

|              |          |          |          |          |          |         |
|--------------|----------|----------|----------|----------|----------|---------|
| ILMN_2672624 | 0.000157 | 2.17E-06 | 10.1716  | 5.468464 | 1.980454 | Hcn2    |
| ILMN_2617265 | 0.000198 | 3.31E-06 | 9.6882   | 5.037043 | 1.977809 | Ipo13   |
| ILMN_2835423 | 0.022688 | 2.98E-03 | 3.968202 | -2.05525 | 1.977421 | Cfd     |
| ILMN_1259322 | 0.001067 | 4.63E-05 | 7.071086 | 2.30372  | 1.964091 | Pdk4    |
| ILMN_2591440 | 3.99E-05 | 1.19E-07 | 14.0971  | 8.35188  | 1.955014 | Noct    |
| ILMN_2858399 | 5.86E-05 | 2.82E-07 | 12.81367 | 7.515061 | 1.953973 | Fitm2   |
| ILMN_2628174 | 6.61E-05 | 3.72E-07 | 12.42161 | 7.240835 | 1.941483 | Acss1   |
| ILMN_2906855 | 9.7E-05  | 8.84E-07 | 11.26912 | 6.37812  | 1.930391 | Ky      |
| ILMN_1247614 | 0.000166 | 2.44E-06 | 10.03698 | 5.35032  | 1.884305 | Dusp18  |
| ILMN_2672221 | 5.68E-05 | 2.64E-07 | 12.90991 | 7.580978 | 1.884042 | Fhod3   |
| ILMN_3128792 | 0.000118 | 1.34E-06 | 10.75373 | 5.962452 | 1.88344  | Ttn     |
| ILMN_2601705 | 0.000719 | 2.58E-05 | 7.595583 | 2.911971 | 1.868931 | Pirt    |
| ILMN_2868013 | 2.54E-05 | 3.01E-08 | 16.40744 | 9.656466 | 1.863118 | Pank1   |
| ILMN_2637661 | 3.8E-05  | 9.82E-08 | 14.40542 | 8.540076 | 1.857681 | Prpf8   |
| ILMN_2675785 | 0.008946 | 8.62E-04 | 4.794488 | -0.76274 | 1.842043 | Myo18b  |
| ILMN_1215246 | 9.03E-05 | 7.65E-07 | 11.45604 | 6.524126 | 1.83291  | Mccc1   |
| ILMN_2788984 | 0.000238 | 4.63E-06 | 9.319363 | 4.694047 | 1.829773 | Acaa2   |
| ILMN_1222261 | 0.000111 | 1.18E-06 | 10.90384 | 6.085555 | 1.826972 | Gon4l   |
| ILMN_1241229 | 6.84E-05 | 4.00E-07 | 12.32132 | 7.169191 | 1.818258 | Prrc2c  |
| ILMN_2750431 | 9.73E-06 | 1.62E-09 | 22.52915 | 12.20956 | 1.804552 | Dst     |
| ILMN_2701815 | 4.88E-05 | 1.75E-07 | 13.51714 | 7.984784 | 1.803122 | Plxna2  |
| ILMN_2689187 | 0.003061 | 2.01E-04 | 5.859715 | 0.762749 | 1.802159 | Ahdc1   |
| ILMN_3151642 | 8.1E-05  | 6.06E-07 | 11.76065 | 6.756862 | 1.80189  | Myocd   |
| ILMN_2874554 | 0.000159 | 2.28E-06 | 10.1164  | 5.4202   | 1.797148 | Aldh4a1 |
| ILMN_1227398 | 0.000288 | 6.40E-06 | 8.97262  | 4.360064 | 1.797044 | Agt     |
| ILMN_2713622 | 0.002859 | 1.82E-04 | 5.936978 | 0.867047 | 1.792968 | Ldb3    |

|              |          |          |          |          |          |          |
|--------------|----------|----------|----------|----------|----------|----------|
| ILMN_2723474 | 2.97E-05 | 5.93E-08 | 15.22943 | 9.02081  | 1.785262 | Adcy9    |
| ILMN_2691157 | 0.005024 | 4.02E-04 | 5.338637 | 0.037003 | 1.771737 | Dctn1    |
| ILMN_3005873 | 0.000545 | 1.69E-05 | 7.993291 | 3.351426 | 1.758297 | Sort1    |
| ILMN_2700107 | 0.000138 | 1.69E-06 | 10.4671  | 5.722588 | 1.755247 | Polr1a   |
| ILMN_2481117 | 0.00033  | 7.95E-06 | 8.747069 | 4.136545 | 1.746601 | Man2a2   |
| ILMN_1254104 | 0.000313 | 7.31E-06 | 8.833558 | 4.222852 | 1.741676 | Prepl    |
| ILMN_1241965 | 3.53E-05 | 8.10E-08 | 14.71566 | 8.724782 | 1.720165 | Mitf     |
| ILMN_3125920 | 0.002462 | 1.47E-04 | 6.106208 | 1.092548 | 1.714946 | Mast2    |
| ILMN_2997002 | 4.53E-05 | 1.48E-07 | 13.76305 | 8.142576 | 1.714916 | Pigo     |
| ILMN_1236539 | 0.000207 | 3.59E-06 | 9.599693 | 4.955857 | 1.712113 | Pfkl     |
| ILMN_1253692 | 0.000663 | 2.26E-05 | 7.719013 | 3.05031  | 1.707176 | Glg1     |
| ILMN_2635784 | 0.000149 | 1.96E-06 | 10.29517 | 5.575592 | 1.704032 | Gpc1     |
| ILMN_2766727 | 0.000206 | 3.55E-06 | 9.610816 | 4.966098 | 1.695791 | Chrm2    |
| ILMN_2670472 | 7.81E-05 | 5.30E-07 | 11.93833 | 6.889743 | 1.691595 | AI464131 |
| ILMN_2662191 | 0.000124 | 1.44E-06 | 10.65981 | 5.884562 | 1.691379 | Oplah    |
| ILMN_1226447 | 0.000583 | 1.87E-05 | 7.8972   | 3.246906 | 1.688153 | Sema4b   |
| ILMN_1233987 | 0.002452 | 1.46E-04 | 6.111291 | 1.099259 | 1.682742 | Hipk2    |
| ILMN_2855590 | 0.000159 | 2.28E-06 | 10.11753 | 5.421194 | 1.682209 | Map7d1   |
| ILMN_2782634 | 0.000279 | 5.96E-06 | 9.04818  | 4.433824 | 1.68078  | Cobl1    |
| ILMN_1218058 | 0.000186 | 2.99E-06 | 9.80498  | 5.143106 | 1.675331 | Atp1a1   |
| ILMN_3004553 | 0.00031  | 7.23E-06 | 8.845198 | 4.23441  | 1.674219 | Pfkm     |
| ILMN_2476341 | 0.00314  | 2.08E-04 | 5.833221 | 0.726789 | 1.668173 | Ago2     |
| ILMN_2752030 | 3.99E-05 | 1.17E-07 | 14.13358 | 8.374393 | 1.66526  | Cacna2d1 |
| ILMN_2670713 | 7.81E-05 | 5.34E-07 | 11.9292  | 6.882961 | 1.663183 | Cyfip2   |
| ILMN_1229216 | 0.001433 | 7.02E-05 | 6.711323 | 1.866573 | 1.662729 | Zbtb16   |
| ILMN_2707207 | 0.00026  | 5.26E-06 | 9.181283 | 4.562418 | 1.660953 | Hhatl    |

|              |          |          |          |          |          |          |
|--------------|----------|----------|----------|----------|----------|----------|
| ILMN_1240274 | 0.000539 | 1.67E-05 | 8.007697 | 3.367007 | 1.660495 | Prrc2b   |
| ILMN_3131197 | 0.000204 | 3.45E-06 | 9.641804 | 4.994571 | 1.656746 | Repin1   |
| ILMN_2784078 | 0.002397 | 1.42E-04 | 6.135247 | 1.130839 | 1.652211 | Mmp15    |
| ILMN_2459899 | 0.000353 | 8.96E-06 | 8.623744 | 4.012174 | 1.650326 | Adamtsl4 |
| ILMN_2687745 | 0.004422 | 3.33E-04 | 5.476932 | 0.233434 | 1.649074 | Pnpla2   |
| ILMN_2601453 | 0.000105 | 1.01E-06 | 11.09805 | 6.242318 | 1.648951 | Fam78a   |
| ILMN_2745889 | 7.93E-05 | 5.59E-07 | 11.86827 | 6.837593 | 1.647661 | Acot2    |
| ILMN_2842338 | 0.000586 | 1.90E-05 | 7.883615 | 3.232046 | 1.647289 | Tbc1d10c |
| ILMN_1222829 | 0.000745 | 2.73E-05 | 7.544697 | 2.854418 | 1.641107 | Ints1    |
| ILMN_1238309 | 5.93E-05 | 3.02E-07 | 12.71473 | 7.446728 | 1.63327  | Rbfox1   |
| ILMN_2713060 | 0.000106 | 1.05E-06 | 11.05383 | 6.206868 | 1.629204 | Fam131a  |
| ILMN_1236742 | 0.002639 | 1.62E-04 | 6.030526 | 0.992199 | 1.626129 | Alpk2    |
| ILMN_1221142 | 0.000769 | 2.85E-05 | 7.504514 | 2.808753 | 1.62498  | Ppard    |
| ILMN_1236008 | 4.2E-05  | 1.28E-07 | 13.99436 | 8.288114 | 1.6239   | Isoc2a   |
| ILMN_1259206 | 0.000108 | 1.11E-06 | 10.97979 | 6.147188 | 1.620509 | Hrc      |
| ILMN_1228497 | 0.000944 | 3.85E-05 | 7.233534 | 2.495714 | 1.620293 | Esrrb    |
| ILMN_2604227 | 5.13E-05 | 2.05E-07 | 13.27472 | 7.82604  | 1.615955 | Sugp2    |
| ILMN_1244134 | 2.79E-05 | 4.27E-08 | 15.78834 | 9.329595 | 1.615777 | Lrp4     |
| ILMN_2923615 | 0.00033  | 7.97E-06 | 8.744081 | 4.13355  | 1.614287 | Ppm1k    |
| ILMN_2664660 | 9.73E-06 | 2.55E-09 | 21.45983 | 11.83771 | 1.613507 | Aldh5a1  |
| ILMN_1253791 | 2.97E-05 | 6.23E-08 | 15.14692 | 8.974071 | 1.611626 | Kcnv2    |
| ILMN_2594899 | 6.42E-05 | 3.54E-07 | 12.49293 | 7.291411 | 1.611124 | Med26    |
| ILMN_1220498 | 0.003704 | 2.60E-04 | 5.663466 | 0.494004 | 1.610212 | Pygm     |
| ILMN_2450031 | 0.007989 | 7.44E-04 | 4.897239 | -0.60847 | 1.609738 | Atp2a2   |
| ILMN_2623591 | 6.42E-05 | 3.56E-07 | 12.48588 | 7.286427 | 1.608274 | Apbb1    |
| ILMN_2756704 | 0.00189  | 1.03E-04 | 6.393624 | 1.466399 | 1.604433 | Parm1    |

|              |          |          |          |          |          |          |
|--------------|----------|----------|----------|----------|----------|----------|
| ILMN_1243455 | 1.12E-05 | 3.69E-09 | 20.61387 | 11.52411 | 1.603713 | Celsr2   |
| ILMN_2709240 | 8.07E-05 | 5.88E-07 | 11.80076 | 6.78704  | 1.602214 | Cpt1b    |
| ILMN_2832641 | 0.00057  | 1.82E-05 | 7.926458 | 3.278841 | 1.599795 | Ndst1    |
| ILMN_1222609 | 0.000336 | 8.30E-06 | 8.702883 | 4.092162 | 1.593185 | Igfals   |
| ILMN_1216617 | 0.006509 | 5.71E-04 | 5.083904 | -0.33207 | 1.593121 | Kmt2d    |
| ILMN_2723881 | 5.48E-05 | 2.45E-07 | 13.01598 | 7.653012 | 1.587701 | Hcfc1    |
| ILMN_2825080 | 2.97E-05 | 6.00E-08 | 15.20907 | 9.009303 | 1.585666 | Ldhd     |
| ILMN_1214500 | 0.000115 | 1.27E-06 | 10.81244 | 6.0108   | 1.581055 | Rgma     |
| ILMN_1218956 | 0.029453 | 4.18E-03 | 3.753131 | -2.40518 | 1.577877 | Tead1    |
| ILMN_2765759 | 0.000392 | 1.04E-05 | 8.471875 | 3.856871 | 1.57608  | Asb2     |
| ILMN_1232261 | 0.000272 | 5.72E-06 | 9.092641 | 4.476968 | 1.575023 | Ctnnal1  |
| ILMN_2717777 | 0.000126 | 1.49E-06 | 10.61663 | 5.848523 | 1.572084 | Polrmt   |
| ILMN_2771709 | 0.00296  | 1.91E-04 | 5.899653 | 0.816767 | 1.571027 | Ppargc1b |
| ILMN_2757232 | 0.00056  | 1.77E-05 | 7.953976 | 3.308788 | 1.567318 | Aqp4     |
| ILMN_2686721 | 0.000179 | 2.75E-06 | 9.897338 | 5.226147 | 1.56467  | Tap2     |
| ILMN_1249691 | 6.92E-05 | 4.14E-07 | 12.27507 | 7.13594  | 1.564006 | Mlycd    |
| ILMN_2524251 | 1.54E-05 | 7.83E-09 | 19.00137 | 10.87354 | 1.563018 | Tnik     |
| ILMN_2610156 | 0.000417 | 1.14E-05 | 8.38539  | 3.767355 | 1.561065 | Neo1     |
| ILMN_3159149 | 0.000681 | 2.37E-05 | 7.676229 | 3.00256  | 1.556875 | Rusc2    |
| ILMN_2658566 | 0.004019 | 2.89E-04 | 5.582286 | 0.381221 | 1.55609  | Midn     |
| ILMN_2690203 | 0.000169 | 2.52E-06 | 10.00037 | 5.31792  | 1.550523 | R3hdm2   |
| ILMN_1251989 | 9.73E-06 | 1.74E-09 | 22.36165 | 12.15304 | 1.549986 | Ryr2     |
| ILMN_1249578 | 0.000945 | 3.86E-05 | 7.23066  | 2.492347 | 1.545504 | Sorl1    |
| ILMN_1228568 | 3.57E-05 | 8.29E-08 | 14.67875 | 8.703047 | 1.543964 | Irf2bp1  |
| ILMN_2914416 | 3.53E-05 | 8.07E-08 | 14.72255 | 8.728831 | 1.543906 | Ncstn    |
| ILMN_1244402 | 0.00033  | 7.98E-06 | 8.742996 | 4.132462 | 1.539939 | Kcnh2    |



|              |          |          |          |          |          |               |
|--------------|----------|----------|----------|----------|----------|---------------|
| ILMN_1252290 | 4.53E-05 | 1.51E-07 | 13.74009 | 8.12798  | 1.53352  | Chd6          |
| ILMN_1254199 | 0.008761 | 8.37E-04 | 4.81471  | -0.73226 | 1.531487 | Gaa           |
| ILMN_3136056 | 0.000708 | 2.51E-05 | 7.622306 | 2.942075 | 1.531326 | Atxn2         |
| ILMN_1240471 | 0.000193 | 3.20E-06 | 9.727754 | 5.073102 | 1.528667 | Retsat        |
| ILMN_2990420 | 0.000121 | 1.39E-06 | 10.70616 | 5.923088 | 1.527964 | Kdm4b         |
| ILMN_3158565 | 3.77E-05 | 9.01E-08 | 14.54385 | 8.623055 | 1.527583 | Plin5         |
| ILMN_2666190 | 0.000845 | 3.28E-05 | 7.378534 | 2.66433  | 1.526567 | Rnpepl1       |
| ILMN_2698801 | 0.000912 | 3.68E-05 | 7.273752 | 2.542741 | 1.525416 | Atg9a         |
| ILMN_2445548 | 0.000562 | 1.78E-05 | 7.948531 | 3.302869 | 1.516718 | C330006A16Rik |
| ILMN_2689887 | 0.000778 | 2.90E-05 | 7.489258 | 2.791365 | 1.515164 | Mark2         |
| ILMN_2688728 | 0.000129 | 1.54E-06 | 10.58375 | 5.820981 | 1.513891 | Pcytl1a       |
| ILMN_2955047 | 8.33E-05 | 6.50E-07 | 11.66858 | 6.687183 | 1.505148 | Dsg2          |
| ILMN_2615855 | 0.000216 | 3.84E-06 | 9.522772 | 4.884729 | 1.503073 | Hnrnpa2b1     |
| ILMN_2803138 | 0.002642 | 1.62E-04 | 6.028871 | 0.989995 | 1.501713 | Prkaa2        |
| ILMN_2736847 | 2.79E-05 | 4.20E-08 | 15.81718 | 9.345171 | 1.501327 | Csdc2         |
| ILMN_2628603 | 0.002042 | 1.14E-04 | 6.311583 | 1.360846 | 1.498897 | Limch1        |
| ILMN_1256171 | 0.00058  | 1.86E-05 | 7.903876 | 3.254202 | 1.495142 | Tmem63b       |
| ILMN_1213862 | 0.000418 | 1.15E-05 | 8.37427  | 3.755787 | 1.493815 | Usp19         |
| ILMN_2702704 | 8.02E-05 | 5.77E-07 | 11.82532 | 6.805473 | 1.493074 | Ndufv1        |
| ILMN_1242794 | 0.000752 | 2.77E-05 | 7.532504 | 2.840582 | 1.492997 | Insr          |
| ILMN_2832524 | 0.000299 | 6.78E-06 | 8.911672 | 4.300162 | 1.491526 | Gpt           |
| ILMN_2639972 | 0.000112 | 1.19E-06 | 10.89563 | 6.078862 | 1.489174 | Ppp1r3b       |
| ILMN_3160507 | 0.000109 | 1.13E-06 | 10.96175 | 6.132587 | 1.487622 | Pm20d2        |
| ILMN_2681474 | 0.009107 | 8.85E-04 | 4.776413 | -0.79003 | 1.486206 | Lmtk2         |
| ILMN_1242039 | 0.000459 | 1.33E-05 | 8.229396 | 3.603882 | 1.485925 | Med14         |
| ILMN_1226195 | 0.001931 | 1.06E-04 | 6.368753 | 1.434496 | 1.48591  | Bag3          |

|              |          |          |          |          |          |          |
|--------------|----------|----------|----------|----------|----------|----------|
| ILMN_2690122 | 6.03E-05 | 3.10E-07 | 12.67688 | 7.42043  | 1.482031 | Slc27a1  |
| ILMN_2971314 | 0.000106 | 1.07E-06 | 11.03378 | 6.190748 | 1.478551 | Dhdh     |
| ILMN_2747507 | 0.008441 | 7.98E-04 | 4.847779 | -0.68254 | 1.477656 | Pitpnm2  |
| ILMN_1225348 | 5.13E-05 | 2.11E-07 | 13.23673 | 7.800872 | 1.475571 | Fam102a  |
| ILMN_2795359 | 0.000117 | 1.31E-06 | 10.77392 | 5.979113 | 1.474451 | Hdlbp    |
| ILMN_2724235 | 0.002556 | 1.55E-04 | 6.066061 | 1.039415 | 1.474334 | Myo18a   |
| ILMN_2949021 | 4.56E-05 | 1.57E-07 | 13.67508 | 8.086498 | 1.472361 | Nceh1    |
| ILMN_2674351 | 1.56E-05 | 9.07E-09 | 18.70017 | 10.74367 | 1.469203 | Ednra    |
| ILMN_2460692 | 9.71E-05 | 8.91E-07 | 11.259   | 6.370146 | 1.468799 | Bves     |
| ILMN_1247682 | 0.003482 | 2.39E-04 | 5.727165 | 0.581838 | 1.468265 | Atp6v0a1 |
| ILMN_1247765 | 0.004492 | 3.40E-04 | 5.461309 | 0.211382 | 1.462052 | Mfhas1   |
| ILMN_1224079 | 0.03068  | 4.43E-03 | 3.716523 | -2.4652  | 1.460728 | Wfs1     |
| ILMN_2992239 | 0.00027  | 5.60E-06 | 9.115082 | 4.498672 | 1.458597 | Amd2     |
| ILMN_2956932 | 0.000593 | 1.94E-05 | 7.865255 | 3.211928 | 1.458193 | Acadv1   |
| ILMN_2957987 | 0.000146 | 1.88E-06 | 10.34071 | 5.614757 | 1.457423 | Perm1    |
| ILMN_1257445 | 0.000358 | 9.14E-06 | 8.604099 | 3.992219 | 1.45736  | Agl      |
| ILMN_1229082 | 0.000498 | 1.49E-05 | 8.116572 | 3.48401  | 1.457171 | Klhl21   |
| ILMN_2694687 | 0.000272 | 5.71E-06 | 9.094364 | 4.478636 | 1.456556 | Mypn     |
| ILMN_3095624 | 0.001181 | 5.32E-05 | 6.949753 | 2.15815  | 1.455778 | Kdm6b    |
| ILMN_1243678 | 0.000547 | 1.71E-05 | 7.983689 | 3.341029 | 1.449147 | Gtf3c1   |
| ILMN_3135566 | 0.005897 | 4.99E-04 | 5.180315 | -0.19128 | 1.447608 | Tsc2     |
| ILMN_1255832 | 0.00164  | 8.51E-05 | 6.550599 | 1.665814 | 1.446021 | Irgq     |
| ILMN_2777696 | 0.000149 | 1.97E-06 | 10.28875 | 5.570055 | 1.445902 | Gcat     |
| ILMN_2788836 | 0.026237 | 3.60E-03 | 3.846328 | -2.25296 | 1.443716 | Myh6     |
| ILMN_2484322 | 0.000105 | 1.02E-06 | 11.08749 | 6.233865 | 1.442581 | Ank3     |
| ILMN_2782061 | 0.001695 | 8.86E-05 | 6.516997 | 1.623407 | 1.441771 | Slc4a3   |

|              |          |          |          |          |          |         |
|--------------|----------|----------|----------|----------|----------|---------|
| ILMN_2806676 | 0.000615 | 2.04E-05 | 7.818242 | 3.16024  | 1.440961 | Acads   |
| ILMN_1224093 | 2.87E-05 | 4.86E-08 | 15.56626 | 9.208503 | 1.440797 | Llg12   |
| ILMN_2992232 | 0.001166 | 5.24E-05 | 6.962386 | 2.173394 | 1.439498 | Mlxipl  |
| ILMN_3004864 | 0.000423 | 1.17E-05 | 8.355739 | 3.736482 | 1.439199 | Sun2    |
| ILMN_1226540 | 0.000273 | 5.78E-06 | 9.080166 | 4.464881 | 1.438044 | Agpat3  |
| ILMN_2633212 | 9.03E-05 | 7.72E-07 | 11.44287 | 6.513914 | 1.431758 | Cox10   |
| ILMN_2864834 | 1.77E-05 | 1.31E-08 | 17.96396 | 10.41421 | 1.430868 | Abcb8   |
| ILMN_2618364 | 0.01462  | 1.67E-03 | 4.346248 | -1.45289 | 1.429889 | Flnc    |
| ILMN_2674184 | 0.000365 | 9.40E-06 | 8.575734 | 3.963336 | 1.429645 | Kcnb1   |
| ILMN_2685985 | 0.003782 | 2.68E-04 | 5.641138 | 0.463079 | 1.428548 | Megf8   |
| ILMN_2765936 | 8.1E-05  | 6.02E-07 | 11.76861 | 6.762862 | 1.42648  | Fam73b  |
| ILMN_2622217 | 0.000919 | 3.73E-05 | 7.262129 | 2.529171 | 1.426204 | Myh11   |
| ILMN_2695900 | 1.26E-05 | 4.43E-09 | 20.20978 | 11.36783 | 1.425726 | Kcnj12  |
| ILMN_1238640 | 0.000272 | 5.74E-06 | 9.088294 | 4.472758 | 1.424105 | Faap100 |
| ILMN_2783519 | 0.000882 | 3.49E-05 | 7.322051 | 2.598954 | 1.422125 | Acadl   |
| ILMN_1224336 | 0.000634 | 2.14E-05 | 7.773289 | 3.110579 | 1.420751 | Spsb1   |
| ILMN_2966826 | 0.004796 | 3.76E-04 | 5.387733 | 0.107054 | 1.41621  | Ttll1   |
| ILMN_2706640 | 0.038384 | 5.94E-03 | 3.53264  | -2.76846 | 1.413101 | Cmya5   |
| ILMN_2518744 | 0.00023  | 4.40E-06 | 9.374043 | 4.745679 | 1.412721 | Wnk4    |
| ILMN_3092653 | 0.044562 | 7.20E-03 | 3.413787 | -2.96582 | 1.410293 | Palld   |
| ILMN_2826709 | 0.000104 | 9.76E-07 | 11.14364 | 6.278719 | 1.408941 | Atad3a  |
| ILMN_2628258 | 0.001351 | 6.41E-05 | 6.788786 | 1.962114 | 1.408837 | Syvn1   |
| ILMN_2927172 | 0.000104 | 9.84E-07 | 11.13385 | 6.270916 | 1.408458 | Ppara   |
| ILMN_2832620 | 0.002584 | 1.57E-04 | 6.052257 | 1.021094 | 1.405671 | Rfx1    |
| ILMN_2813547 | 0.001149 | 5.13E-05 | 6.980895 | 2.195691 | 1.402893 | Scn4b   |
| ILMN_2733179 | 5.48E-05 | 2.43E-07 | 13.02805 | 7.661167 | 1.401523 | Aldh2   |

|              |          |          |          |          |          |          |
|--------------|----------|----------|----------|----------|----------|----------|
| ILMN_1228288 | 0.00519  | 4.20E-04 | 5.306148 | -0.00955 | 1.400023 | Zbtb20   |
| ILMN_2885532 | 0.000375 | 9.71E-06 | 8.542943 | 3.929843 | 1.398484 | Cpt2     |
| ILMN_2845214 | 0.000365 | 9.39E-06 | 8.576764 | 3.964387 | 1.398332 | Lrpprc   |
| ILMN_1254671 | 0.000244 | 4.79E-06 | 9.281674 | 4.658296 | 1.39777  | BC034090 |
| ILMN_2719069 | 0.000381 | 9.96E-06 | 8.516841 | 3.903103 | 1.390992 | Maob     |
| ILMN_2966104 | 2.63E-05 | 3.71E-08 | 16.03346 | 9.460867 | 1.388626 | Htra1    |
| ILMN_1222599 | 0.000127 | 1.51E-06 | 10.60382 | 5.837801 | 1.387183 | Ubr4     |
| ILMN_2798674 | 0.000219 | 3.95E-06 | 9.494039 | 4.858023 | 1.384871 | Proser1  |
| ILMN_1245489 | 0.003868 | 2.76E-04 | 5.617909 | 0.430828 | 1.384353 | Tmem94   |
| ILMN_1245815 | 0.000273 | 5.78E-06 | 9.08159  | 4.466262 | 1.383906 | Ube2o    |
| ILMN_2755727 | 0.000115 | 1.26E-06 | 10.82692 | 6.022685 | 1.383059 | Filip1   |
| ILMN_2509327 | 0.005315 | 4.33E-04 | 5.284448 | -0.04072 | 1.382565 | Wipf3    |
| ILMN_2993221 | 0.000813 | 3.09E-05 | 7.432111 | 2.725984 | 1.375974 | Slc4a4   |
| ILMN_1250904 | 0.000445 | 1.26E-05 | 8.278761 | 3.655896 | 1.374187 | Rtn2     |
| ILMN_1257579 | 3.78E-05 | 9.62E-08 | 14.43888 | 8.560217 | 1.374186 | Nup210   |
| ILMN_2727329 | 8.08E-05 | 5.90E-07 | 11.79547 | 6.783071 | 1.373285 | Bckdha   |
| ILMN_1235186 | 7.63E-05 | 5.00E-07 | 12.01705 | 6.947944 | 1.372697 | Cox15    |
| ILMN_1232596 | 0.000137 | 1.67E-06 | 10.48462 | 5.737432 | 1.369721 | Pom121   |
| ILMN_1259606 | 0.00149  | 7.43E-05 | 6.664221 | 1.808093 | 1.369563 | Abhd18   |
| ILMN_1232621 | 0.000151 | 2.01E-06 | 10.26042 | 5.54559  | 1.369502 | Ank      |
| ILMN_2789294 | 2.87E-05 | 4.99E-08 | 15.52269 | 9.1845   | 1.368792 | Tmem25   |
| ILMN_1248181 | 0.003409 | 2.32E-04 | 5.750217 | 0.613481 | 1.36696  | Zbtb7a   |
| ILMN_2487847 | 0.000229 | 4.34E-06 | 9.388275 | 4.759073 | 1.366664 | Uhrf1bp1 |
| ILMN_2628488 | 3.84E-05 | 1.01E-07 | 14.36422 | 8.515196 | 1.365234 | Pick1    |
| ILMN_1237821 | 0.000333 | 8.16E-06 | 8.720356 | 4.109736 | 1.365118 | Hectd1   |
| ILMN_1257253 | 3.35E-05 | 7.26E-08 | 14.89395 | 8.828873 | 1.361806 | Iqsec2   |

|              |          |          |          |          |          |               |
|--------------|----------|----------|----------|----------|----------|---------------|
| ILMN_3094043 | 0.000155 | 2.13E-06 | 10.19263 | 5.486787 | 1.359707 | Paqr9         |
| ILMN_3158250 | 0.003045 | 1.99E-04 | 5.866941 | 0.772539 | 1.358692 | Cxcl12        |
| ILMN_1257876 | 9.73E-06 | 2.02E-09 | 22.00202 | 12.02955 | 1.357472 | B4gat1        |
| ILMN_2760064 | 1.56E-05 | 8.55E-09 | 18.81984 | 10.7956  | 1.357274 | Focad         |
| ILMN_2630730 | 7.81E-05 | 5.32E-07 | 11.93466 | 6.887018 | 1.357073 | Sf3a1         |
| ILMN_2645526 | 0.000115 | 1.27E-06 | 10.81438 | 6.012395 | 1.355772 | Abcc8         |
| ILMN_2652518 | 0.000116 | 1.29E-06 | 10.79469 | 5.996212 | 1.354708 | Atg2b         |
| ILMN_1246992 | 0.000946 | 3.87E-05 | 7.229657 | 2.491171 | 1.353191 | Hmgxb3        |
| ILMN_1232237 | 0.001905 | 1.04E-04 | 6.386013 | 1.456644 | 1.35065  | Ciapi1        |
| ILMN_2685329 | 0.001139 | 5.07E-05 | 6.99085  | 2.207666 | 1.350323 | Hspg2         |
| ILMN_1216689 | 0.002388 | 1.41E-04 | 6.139088 | 1.135896 | 1.349319 | Aplp2         |
| ILMN_2664040 | 0.000201 | 3.38E-06 | 9.667139 | 5.017788 | 1.348129 | Alas1         |
| ILMN_3104271 | 0.000159 | 2.26E-06 | 10.12568 | 5.428331 | 1.347446 | Abcc9         |
| ILMN_2694659 | 7.38E-05 | 4.73E-07 | 12.09314 | 7.003826 | 1.345902 | Ckap5         |
| ILMN_2489448 | 0.000337 | 8.33E-06 | 8.698289 | 4.087537 | 1.343871 | Sobp          |
| ILMN_2879534 | 0.001076 | 4.71E-05 | 7.056054 | 2.285786 | 1.342357 | Extl1         |
| ILMN_2670778 | 0.001843 | 9.95E-05 | 6.421426 | 1.50196  | 1.341666 | Kif1b         |
| ILMN_2661005 | 9.03E-05 | 7.76E-07 | 11.43673 | 6.509156 | 1.340952 | Arel1         |
| ILMN_2486863 | 0.003287 | 2.22E-04 | 5.784144 | 0.659914 | 1.332046 | Fam160b2      |
| ILMN_2422333 | 1.51E-05 | 7.34E-09 | 19.13413 | 10.92991 | 1.330795 | Trap1         |
| ILMN_1216308 | 0.000455 | 1.31E-05 | 8.245894 | 3.621294 | 1.33049  | Zfp574        |
| ILMN_2684316 | 0.000484 | 1.43E-05 | 8.154911 | 3.5249   | 1.329181 | P2ry1         |
| ILMN_1250303 | 7.37E-05 | 4.65E-07 | 12.11551 | 7.020181 | 1.327607 | C730029A08Rik |
| ILMN_2593496 | 0.00014  | 1.72E-06 | 10.44587 | 5.704561 | 1.325121 | Got2          |
| ILMN_1229556 | 0.000193 | 3.16E-06 | 9.743201 | 5.087145 | 1.325085 | Ppp1r12b      |
| ILMN_2501267 | 0.001222 | 5.57E-05 | 6.909618 | 2.109583 | 1.324885 | Tmc7          |

|              |          |          |          |          |          |         |
|--------------|----------|----------|----------|----------|----------|---------|
| ILMN_3053158 | 0.000231 | 4.42E-06 | 9.370675 | 4.742507 | 1.323844 | Dyrk1b  |
| ILMN_2511768 | 0.000155 | 2.13E-06 | 10.19224 | 5.486441 | 1.321957 | Ttc17   |
| ILMN_2595637 | 0.000111 | 1.17E-06 | 10.92105 | 6.09956  | 1.320006 | Dnajc16 |
| ILMN_3153940 | 0.000659 | 2.25E-05 | 7.725293 | 3.057301 | 1.31858  | Unc45b  |
| ILMN_1239535 | 0.001057 | 4.55E-05 | 7.085549 | 2.320947 | 1.31609  | Plekhm2 |
| ILMN_1250017 | 0.000586 | 1.90E-05 | 7.886143 | 3.234813 | 1.314884 | Rptor   |
| ILMN_2705991 | 0.000107 | 1.09E-06 | 11.001   | 6.164332 | 1.313431 | Tpp1    |
| ILMN_1244906 | 0.000355 | 9.03E-06 | 8.615808 | 4.004117 | 1.311639 | Ap1b1   |
| ILMN_1249888 | 0.046369 | 7.57E-03 | 3.383079 | -3.01696 | 1.305566 | Adcy6   |
| ILMN_2633333 | 0.005875 | 4.97E-04 | 5.183829 | -0.18617 | 1.304152 | Brd4    |
| ILMN_1254488 | 0.000193 | 3.19E-06 | 9.732173 | 5.077121 | 1.303751 | Mgrn1   |
| ILMN_2644161 | 9.96E-06 | 3.08E-09 | 21.02242 | 11.6778  | 1.299503 | Acad12  |
| ILMN_2517170 | 0.000636 | 2.15E-05 | 7.768279 | 3.105031 | 1.297405 | Tuba4a  |
| ILMN_1234471 | 0.000176 | 2.64E-06 | 9.945726 | 5.269361 | 1.29541  | Cux2    |
| ILMN_3129198 | 0.004666 | 3.61E-04 | 5.417689 | 0.149626 | 1.292901 | Pgm5    |
| ILMN_2694381 | 0.001535 | 7.75E-05 | 6.628242 | 1.763226 | 1.290993 | Dnajc7  |
| ILMN_1257020 | 4.38E-05 | 1.35E-07 | 13.90362 | 8.231351 | 1.289017 | Aldh1b1 |
| ILMN_2501357 | 2.44E-05 | 2.64E-08 | 16.64093 | 9.775804 | 1.28871  | Dyrk1a  |
| ILMN_1219915 | 0.000819 | 3.13E-05 | 7.421197 | 2.713453 | 1.288351 | Dgat2   |
| ILMN_2668261 | 0.000104 | 9.76E-07 | 11.14419 | 6.279153 | 1.284833 | Slc26a6 |
| ILMN_1234702 | 0.000697 | 2.44E-05 | 7.647195 | 2.970035 | 1.284105 | Gpt2    |
| ILMN_2933112 | 0.000162 | 2.36E-06 | 10.07627 | 5.384956 | 1.280907 | Oat     |
| ILMN_2641278 | 0.000462 | 1.34E-05 | 8.22229  | 3.596373 | 1.280242 | Mfn2    |
| ILMN_3107156 | 0.001221 | 5.56E-05 | 6.910432 | 2.110571 | 1.27963  | Anxa11  |
| ILMN_2679386 | 0.048469 | 8.01E-03 | 3.348285 | -3.07497 | 1.276508 | Gsn     |
| ILMN_2680673 | 0.00134  | 6.35E-05 | 6.797529 | 1.972847 | 1.275524 | Fign    |

|              |          |          |          |          |          |          |
|--------------|----------|----------|----------|----------|----------|----------|
| ILMN_2475585 | 5.01E-05 | 1.82E-07 | 13.45105 | 7.941819 | 1.275196 | Vdac1    |
| ILMN_2859032 | 0.000454 | 1.30E-05 | 8.251642 | 3.627354 | 1.274682 | Gfod1    |
| ILMN_2716098 | 0.000123 | 1.43E-06 | 10.67083 | 5.893733 | 1.273816 | Hsph1    |
| ILMN_2718330 | 0.001695 | 8.86E-05 | 6.516637 | 1.622952 | 1.272991 | Cish     |
| ILMN_1251909 | 6.16E-05 | 3.18E-07 | 12.64146 | 7.395744 | 1.271922 | Vars2    |
| ILMN_3136542 | 0.000276 | 5.89E-06 | 9.061271 | 4.446547 | 1.27186  | Gcdh     |
| ILMN_2529395 | 0.000205 | 3.52E-06 | 9.621599 | 4.976016 | 1.270585 | Fbxo10   |
| ILMN_2993804 | 0.006483 | 5.68E-04 | 5.087802 | -0.32635 | 1.267045 | Ift81    |
| ILMN_1249698 | 0.000433 | 1.21E-05 | 8.324814 | 3.704184 | 1.267018 | Wbp2     |
| ILMN_2881272 | 0.000288 | 6.39E-06 | 8.975207 | 4.362598 | 1.265819 | Aifm1    |
| ILMN_2669487 | 0.023422 | 3.11E-03 | 3.941144 | -2.09901 | 1.265809 | Kcnk3    |
| ILMN_3036708 | 0.000522 | 1.60E-05 | 8.050652 | 3.413325 | 1.263877 | Gatsl2   |
| ILMN_2606667 | 0.002536 | 1.53E-04 | 6.074751 | 1.050936 | 1.263735 | Ddx6     |
| ILMN_3114641 | 0.002414 | 1.43E-04 | 6.127274 | 1.120338 | 1.262638 | Pik3r1   |
| ILMN_1258601 | 0.000782 | 2.92E-05 | 7.483442 | 2.784729 | 1.257856 | Ywhag    |
| ILMN_2757569 | 0.001381 | 6.63E-05 | 6.759751 | 1.926395 | 1.256793 | Eno3     |
| ILMN_1237323 | 8.62E-05 | 6.95E-07 | 11.58046 | 6.619954 | 1.25631  | Lman2l   |
| ILMN_2723639 | 0.000231 | 4.44E-06 | 9.364911 | 4.737075 | 1.255933 | Pacs1    |
| ILMN_2595091 | 5.13E-05 | 2.11E-07 | 13.23635 | 7.800618 | 1.254524 | Nhlrc1   |
| ILMN_2996683 | 0.000179 | 2.73E-06 | 9.906708 | 5.234531 | 1.254005 | Nectin2  |
| ILMN_2689274 | 0.024166 | 3.23E-03 | 3.915393 | -2.14072 | 1.252684 | Dync1h1  |
| ILMN_1238982 | 0.035074 | 5.29E-03 | 3.604497 | -2.64962 | 1.250601 | Myom2    |
| ILMN_1225056 | 9.73E-06 | 2.79E-09 | 21.24528 | 11.75986 | 1.246905 | Slc5a6   |
| ILMN_2763674 | 0.000285 | 6.24E-06 | 8.998956 | 4.385836 | 1.24476  | Fto      |
| ILMN_1237034 | 0.000217 | 3.89E-06 | 9.509384 | 4.872295 | 1.244566 | AU040320 |
| ILMN_2670517 | 0.000155 | 2.13E-06 | 10.19404 | 5.48801  | 1.243983 | Fntb     |

|              |          |          |          |          |          |         |
|--------------|----------|----------|----------|----------|----------|---------|
| ILMN_1246734 | 0.000155 | 2.08E-06 | 10.22012 | 5.510672 | 1.242155 | Osbp2   |
| ILMN_1260244 | 0.000396 | 1.05E-05 | 8.4591   | 3.843698 | 1.24046  | Zfp777  |
| ILMN_2936199 | 0.000176 | 2.64E-06 | 9.944222 | 5.268022 | 1.239721 | Trim32  |
| ILMN_2651035 | 0.000546 | 1.70E-05 | 7.991262 | 3.349229 | 1.238861 | Kremen1 |
| ILMN_2697499 | 0.000216 | 3.84E-06 | 9.523652 | 4.885546 | 1.237994 | Igdcc4  |
| ILMN_2666447 | 0.000267 | 5.50E-06 | 9.1345   | 4.517413 | 1.236038 | Intu    |
| ILMN_2963792 | 3.98E-05 | 1.14E-07 | 14.17561 | 8.400249 | 1.230902 | Trmt11  |
| ILMN_2669958 | 0.000587 | 1.91E-05 | 7.879454 | 3.22749  | 1.230209 | Bcas3   |
| ILMN_1231930 | 0.000104 | 9.97E-07 | 11.11655 | 6.257111 | 1.22947  | Tesk1   |
| ILMN_2698046 | 0.013349 | 1.47E-03 | 4.428464 | -1.32426 | 1.229405 | Stat3   |
| ILMN_2948649 | 0.001578 | 8.07E-05 | 6.594801 | 1.721369 | 1.22829  | Helz    |
| ILMN_1223862 | 0.000304 | 6.97E-06 | 8.883013 | 4.271868 | 1.227787 | Cux1    |
| ILMN_2712685 | 0.000236 | 4.57E-06 | 9.333765 | 4.707673 | 1.226479 | Phka1   |
| ILMN_1255611 | 0.000243 | 4.74E-06 | 9.294599 | 4.670571 | 1.225534 | Ppp1r3d |
| ILMN_1217353 | 0.000307 | 7.08E-06 | 8.867332 | 4.256352 | 1.224269 | Rfx2    |
| ILMN_1219208 | 0.000329 | 7.91E-06 | 8.751894 | 4.14138  | 1.223829 | Nol6    |
| ILMN_1229829 | 0.000102 | 9.58E-07 | 11.16688 | 6.297217 | 1.221185 | Arid1a  |
| ILMN_1237752 | 0.0001   | 9.35E-07 | 11.19793 | 6.321868 | 1.219024 | Ubr2    |
| ILMN_2517171 | 0.000488 | 1.44E-05 | 8.147658 | 3.517176 | 1.21888  | Stk16   |
| ILMN_2715201 | 0.000893 | 3.57E-05 | 7.301105 | 2.57461  | 1.216407 | Golga2  |
| ILMN_2659960 | 0.000807 | 3.05E-05 | 7.443557 | 2.73911  | 1.2155   | Lrba    |
| ILMN_2697174 | 2.63E-05 | 3.68E-08 | 16.0477  | 9.468413 | 1.215191 | Trrap   |
| ILMN_2491654 | 0.020802 | 2.66E-03 | 4.041063 | -1.93783 | 1.214727 | Ubap2   |
| ILMN_2547737 | 0.000114 | 1.25E-06 | 10.83385 | 6.028365 | 1.214425 | Daam1   |
| ILMN_2678336 | 0.002532 | 1.53E-04 | 6.076267 | 1.052943 | 1.214347 | Ctf1    |
| ILMN_2740134 | 6.29E-05 | 3.34E-07 | 12.57359 | 7.348234 | 1.212278 | Idh3a   |



|              |          |          |          |          |          |         |
|--------------|----------|----------|----------|----------|----------|---------|
| ILMN_1250265 | 0.003409 | 2.32E-04 | 5.749678 | 0.612742 | 1.211253 | Scn5a   |
| ILMN_2686252 | 0.009107 | 8.85E-04 | 4.776395 | -0.79006 | 1.211231 | Ppip5k1 |
| ILMN_2790246 | 6.29E-05 | 3.38E-07 | 12.55668 | 7.336357 | 1.210974 | Herpud1 |
| ILMN_2893321 | 5.13E-05 | 2.10E-07 | 13.23909 | 7.802432 | 1.210602 | Fam185a |
| ILMN_2822915 | 0.000285 | 6.25E-06 | 8.997297 | 4.384214 | 1.208091 | Lnpep   |
| ILMN_1254786 | 0.00014  | 1.75E-06 | 10.42829 | 5.689612 | 1.20687  | Ech1    |
| ILMN_2609052 | 0.006541 | 5.75E-04 | 5.079614 | -0.33837 | 1.205916 | Dynll2  |
| ILMN_2820948 | 0.00027  | 5.65E-06 | 9.10487  | 4.488801 | 1.204964 | Dbt     |
| ILMN_3161263 | 0.000709 | 2.52E-05 | 7.617865 | 2.937078 | 1.204964 | Fzd5    |
| ILMN_1257501 | 0.00014  | 1.76E-06 | 10.41982 | 5.682404 | 1.204636 | Gatb    |
| ILMN_2466164 | 0.001    | 4.18E-05 | 7.160205 | 2.409456 | 1.203156 | Wfdc1   |
| ILMN_2962958 | 2.97E-05 | 6.09E-08 | 15.18555 | 8.995995 | 1.20068  | Nudc    |
| ILMN_2737296 | 0.00011  | 1.15E-06 | 10.9374  | 6.112844 | 1.198547 | Lars2   |
| ILMN_2748384 | 0.000909 | 3.66E-05 | 7.27989  | 2.549901 | 1.197967 | Zfp710  |
| ILMN_2710678 | 0.001471 | 7.28E-05 | 6.680485 | 1.828319 | 1.19791  | Nfic    |
| ILMN_2926155 | 0.004248 | 3.15E-04 | 5.519094 | 0.292769 | 1.193862 | Rbm38   |
| ILMN_3158444 | 0.000107 | 1.08E-06 | 11.01253 | 6.173632 | 1.192697 | Ank2    |
| ILMN_1230048 | 0.000269 | 5.56E-06 | 9.121433 | 4.504805 | 1.192213 | Fxr2    |
| ILMN_2602204 | 0.000281 | 6.05E-06 | 9.033036 | 4.419085 | 1.192106 | Tsc22d2 |
| ILMN_2457727 | 7.71E-05 | 5.11E-07 | 11.98949 | 6.927611 | 1.190924 | Adrb1   |
| ILMN_1248465 | 0.000392 | 1.04E-05 | 8.476179 | 3.861306 | 1.190646 | Zcchc3  |
| ILMN_2750089 | 0.001195 | 5.39E-05 | 6.93711  | 2.142872 | 1.189924 | Slc38a3 |
| ILMN_2605453 | 0.000157 | 2.18E-06 | 10.16937 | 5.466514 | 1.189898 | Ranbp10 |
| ILMN_1227459 | 0.000681 | 2.37E-05 | 7.676103 | 3.002419 | 1.18958  | Gga2    |
| ILMN_2589525 | 0.000157 | 2.18E-06 | 10.1655  | 5.463143 | 1.189579 | Cpeb3   |
| ILMN_3153225 | 0.002138 | 1.21E-04 | 6.261102 | 1.295438 | 1.187317 | Pomgnt2 |

|              |          |          |          |          |          |         |
|--------------|----------|----------|----------|----------|----------|---------|
| ILMN_2742599 | 0.046182 | 7.53E-03 | 3.386217 | -3.01173 | 1.187071 | Nfix    |
| ILMN_2987339 | 0.000288 | 6.35E-06 | 8.981538 | 4.368798 | 1.186908 | Mybbp1a |
| ILMN_1219898 | 6.84E-05 | 4.02E-07 | 12.31633 | 7.165607 | 1.186221 | Dnajc28 |
| ILMN_2748837 | 0.002174 | 1.24E-04 | 6.240741 | 1.268959 | 1.185422 | Aco2    |
| ILMN_2667814 | 0.000396 | 1.06E-05 | 8.456495 | 3.84101  | 1.185005 | Iars2   |
| ILMN_2484679 | 0.001757 | 9.38E-05 | 6.470049 | 1.563902 | 1.181355 | Gpcpd1  |
| ILMN_1224664 | 0.012354 | 1.33E-03 | 4.497157 | -1.21748 | 1.17992  | Kdm2a   |
| ILMN_3163481 | 8.62E-05 | 6.98E-07 | 11.57407 | 6.615057 | 1.178471 | Trappc9 |
| ILMN_1222009 | 8.1E-05  | 6.08E-07 | 11.75647 | 6.753711 | 1.174712 | Gab1    |
| ILMN_2780205 | 0.002503 | 1.50E-04 | 6.088295 | 1.068869 | 1.172291 | Ctnna1  |
| ILMN_2894355 | 0.002414 | 1.43E-04 | 6.127731 | 1.12094  | 1.171128 | Prox1   |
| ILMN_1255897 | 3.87E-05 | 1.05E-07 | 14.30623 | 8.480039 | 1.17086  | Dip2c   |
| ILMN_2950837 | 6.23E-05 | 3.26E-07 | 12.60964 | 7.373509 | 1.170067 | Mfn1    |
| ILMN_1216883 | 0.005153 | 4.15E-04 | 5.314052 | 0.001791 | 1.167278 | Raver1  |
| ILMN_3009685 | 0.000955 | 3.92E-05 | 7.218005 | 2.477504 | 1.166562 | Ptpns   |
| ILMN_2442914 | 6.42E-05 | 3.54E-07 | 12.49118 | 7.290172 | 1.165749 | Lsm14b  |
| ILMN_2931096 | 0.010345 | 1.04E-03 | 4.664048 | -0.96073 | 1.162615 | Igf2r   |
| ILMN_1244272 | 0.00141  | 6.83E-05 | 6.734653 | 1.89543  | 1.159303 | Epb41l3 |
| ILMN_2424912 | 0.000852 | 3.31E-05 | 7.368836 | 2.653132 | 1.159083 | Vamp2   |
| ILMN_1255216 | 0.00019  | 3.07E-06 | 9.773133 | 5.1143   | 1.158358 | Hsf1    |
| ILMN_2833376 | 2.97E-05 | 6.00E-08 | 15.21049 | 9.010108 | 1.157735 | Prkaca  |
| ILMN_2624713 | 0.003264 | 2.20E-04 | 5.791718 | 0.670256 | 1.157244 | Mast4   |
| ILMN_2626359 | 0.00027  | 5.64E-06 | 9.106299 | 4.490183 | 1.156596 | Cds2    |
| ILMN_2760430 | 0.002248 | 1.30E-04 | 6.201156 | 1.217312 | 1.156504 | Lrp10   |
| ILMN_2494747 | 5.68E-05 | 2.65E-07 | 12.90387 | 7.57686  | 1.156221 | Huwl    |
| ILMN_2810473 | 0.001149 | 5.13E-05 | 6.980478 | 2.195189 | 1.156072 | Acadm   |

|              |          |          |          |          |          |         |
|--------------|----------|----------|----------|----------|----------|---------|
| ILMN_2655025 | 0.006113 | 5.24E-04 | 5.145283 | -0.24228 | 1.152179 | Dennd4b |
| ILMN_1248384 | 7.92E-05 | 5.56E-07 | 11.87454 | 6.84228  | 1.151157 | Ylpm1   |
| ILMN_2524489 | 0.019115 | 2.38E-03 | 4.114252 | -1.82049 | 1.150039 | Afg3l2  |
| ILMN_3150313 | 0.001544 | 7.83E-05 | 6.620276 | 1.753269 | 1.150003 | Strip2  |
| ILMN_2835461 | 0.000312 | 7.27E-06 | 8.839584 | 4.228837 | 1.147784 | Noa1    |
| ILMN_3148489 | 0.002802 | 1.77E-04 | 5.961153 | 0.899508 | 1.147645 | Furin   |
| ILMN_1242264 | 0.001924 | 1.06E-04 | 6.372552 | 1.439375 | 1.147317 | Supt6   |
| ILMN_2934533 | 0.013246 | 1.46E-03 | 4.436073 | -1.3124  | 1.146887 | Prpf19  |
| ILMN_1241756 | 0.000155 | 2.13E-06 | 10.19354 | 5.487578 | 1.145569 | Nfib    |
| ILMN_2967622 | 0.000288 | 6.33E-06 | 8.985082 | 4.372267 | 1.144012 | Gpsm1   |
| ILMN_2447456 | 0.017086 | 2.07E-03 | 4.204873 | -1.6761  | 1.143673 | Kdm6a   |
| ILMN_2657190 | 0.000705 | 2.49E-05 | 7.63164  | 2.952568 | 1.142855 | Fbxo42  |
| ILMN_2590321 | 0.002961 | 1.91E-04 | 5.89904  | 0.81594  | 1.142612 | Nhlrc2  |
| ILMN_1258158 | 0.002051 | 1.14E-04 | 6.306803 | 1.354667 | 1.141524 | Aldh6a1 |
| ILMN_2421751 | 0.000192 | 3.14E-06 | 9.747705 | 5.091237 | 1.14108  | Kif1c   |
| ILMN_2424605 | 0.000332 | 8.10E-06 | 8.727524 | 4.116937 | 1.140485 | Txnrd2  |
| ILMN_1223875 | 0.001068 | 4.63E-05 | 7.069596 | 2.301943 | 1.135161 | Rasd2   |
| ILMN_1222333 | 0.008931 | 8.60E-04 | 4.796188 | -0.76017 | 1.13476  | Slc2a4  |
| ILMN_2562146 | 0.00377  | 2.67E-04 | 5.643981 | 0.46702  | 1.134483 | Ankhd1  |
| ILMN_2958484 | 0.000298 | 6.76E-06 | 8.915917 | 4.304345 | 1.132276 | Nlr1    |
| ILMN_2421179 | 0.014743 | 1.69E-03 | 4.338965 | -1.46432 | 1.13113  | Rhobtb1 |
| ILMN_2675674 | 0.00647  | 5.67E-04 | 5.089726 | -0.32353 | 1.13037  | Acsf2   |
| ILMN_2466601 | 0.000277 | 5.91E-06 | 9.057321 | 4.44271  | 1.129803 | Wdr7    |
| ILMN_2722716 | 0.015329 | 1.78E-03 | 4.303093 | -1.52075 | 1.129583 | Atp1a2  |
| ILMN_1217519 | 0.000302 | 6.90E-06 | 8.894653 | 4.283369 | 1.128586 | Myh14   |
| ILMN_1233008 | 0.000105 | 1.02E-06 | 11.09164 | 6.237189 | 1.128215 | Dhx30   |

|              |          |          |          |          |          |          |
|--------------|----------|----------|----------|----------|----------|----------|
| ILMN_2636666 | 0.001547 | 7.85E-05 | 6.617746 | 1.750104 | 1.127881 | Prodh    |
| ILMN_2796472 | 0.001073 | 4.67E-05 | 7.062521 | 2.293505 | 1.126716 | Vldlr    |
| ILMN_2792924 | 0.000514 | 1.55E-05 | 8.076944 | 3.441575 | 1.124952 | Gstk1    |
| ILMN_1252110 | 0.000391 | 1.04E-05 | 8.477695 | 3.862867 | 1.124883 | Foxj2    |
| ILMN_1255551 | 0.040619 | 6.39E-03 | 3.487218 | -2.84377 | 1.123855 | Sorbs1   |
| ILMN_2599719 | 0.000691 | 2.42E-05 | 7.65701  | 2.981041 | 1.121007 | Slc44a2  |
| ILMN_1245678 | 0.00492  | 3.90E-04 | 5.360462 | 0.068186 | 1.120831 | Abhd1    |
| ILMN_2621901 | 0.000113 | 1.22E-06 | 10.86688 | 6.055398 | 1.120675 | N4bp1    |
| ILMN_2743780 | 0.000512 | 1.55E-05 | 8.080656 | 3.445557 | 1.120231 | Msl2     |
| ILMN_1230087 | 0.00073  | 2.64E-05 | 7.574922 | 2.888641 | 1.118315 | Psme4    |
| ILMN_2681824 | 4.78E-05 | 1.69E-07 | 13.56798 | 8.017668 | 1.118194 | Fbxw7    |
| ILMN_3023962 | 0.000347 | 8.74E-06 | 8.64941  | 4.038185 | 1.117997 | Tnni3k   |
| ILMN_1223268 | 0.000178 | 2.71E-06 | 9.916076 | 5.242905 | 1.117436 | Bcl2l13  |
| ILMN_1237234 | 5.12E-05 | 1.93E-07 | 13.36566 | 7.885964 | 1.116184 | Tarsl2   |
| ILMN_2597769 | 0.001049 | 4.51E-05 | 7.0943   | 2.331359 | 1.114865 | Igf2     |
| ILMN_2819530 | 0.00074  | 2.71E-05 | 7.553019 | 2.863852 | 1.11429  | Rpap3    |
| ILMN_3142789 | 0.000105 | 1.02E-06 | 11.08895 | 6.235038 | 1.113321 | Abcb10   |
| ILMN_2474111 | 4.53E-05 | 1.50E-07 | 13.74623 | 8.131883 | 1.113147 | Arfgef2  |
| ILMN_3002181 | 2.23E-05 | 2.06E-08 | 17.10518 | 10.00697 | 1.112657 | Ppif     |
| ILMN_1248254 | 0.000218 | 3.94E-06 | 9.496406 | 4.860226 | 1.112316 | Gfm1     |
| ILMN_2419138 | 0.000417 | 1.14E-05 | 8.382633 | 3.764488 | 1.11156  | Vcl      |
| ILMN_1247131 | 0.000211 | 3.71E-06 | 9.562924 | 4.921923 | 1.111111 | Emc10    |
| ILMN_2590896 | 0.000562 | 1.78E-05 | 7.94815  | 3.302455 | 1.110502 | Slc25a13 |
| ILMN_1217815 | 0.001709 | 8.97E-05 | 6.506762 | 1.610459 | 1.109169 | Cacnb2   |
| ILMN_1225300 | 0.000709 | 2.53E-05 | 7.616168 | 2.935168 | 1.107897 | Slc25a29 |
| ILMN_2844097 | 0.002738 | 1.71E-04 | 5.987554 | 0.934862 | 1.107809 | Foxn3    |

|              |          |          |          |          |          |           |
|--------------|----------|----------|----------|----------|----------|-----------|
| ILMN_3064283 | 0.011398 | 1.19E-03 | 4.575493 | -1.09649 | 1.107571 | Pde4dip   |
| ILMN_2783852 | 0.000185 | 2.92E-06 | 9.830901 | 5.166487 | 1.107336 | Adgrl1    |
| ILMN_1238648 | 8.07E-05 | 5.88E-07 | 11.80155 | 6.787638 | 1.107318 | Tbc1d4    |
| ILMN_2713898 | 0.012001 | 1.28E-03 | 4.524221 | -1.17559 | 1.106979 | Ddr1      |
| ILMN_2433547 | 0.000117 | 1.32E-06 | 10.76658 | 5.973059 | 1.106771 | Trp53bp1  |
| ILMN_2679456 | 0.004536 | 3.46E-04 | 5.449171 | 0.194225 | 1.106769 | Crat      |
| ILMN_2698443 | 0.000304 | 6.96E-06 | 8.885194 | 4.274024 | 1.105892 | Efnb1     |
| ILMN_2503651 | 0.000317 | 7.48E-06 | 8.80931  | 4.19873  | 1.103465 | Usp9x     |
| ILMN_2663230 | 0.004291 | 3.20E-04 | 5.507284 | 0.276176 | 1.101447 | Slco3a1   |
| ILMN_3005211 | 0.028026 | 3.92E-03 | 3.7931   | -2.33979 | 1.100861 | Akap6     |
| ILMN_2631591 | 0.000138 | 1.69E-06 | 10.47122 | 5.726079 | 1.100504 | Nckap5    |
| ILMN_1254154 | 0.024854 | 3.36E-03 | 3.891531 | -2.17944 | 1.100028 | Prrc2a    |
| ILMN_2875938 | 9.13E-05 | 8.10E-07 | 11.38124 | 6.465996 | 1.097334 | Pccb      |
| ILMN_2491232 | 0.000537 | 1.66E-05 | 8.014117 | 3.373942 | 1.096534 | Usp36     |
| ILMN_1228970 | 5.48E-05 | 2.48E-07 | 12.99717 | 7.640287 | 1.095884 | Rhobtb2   |
| ILMN_2721874 | 0.000204 | 3.49E-06 | 9.630581 | 4.984269 | 1.094796 | Arhgap20  |
| ILMN_2804523 | 0.010406 | 1.05E-03 | 4.658374 | -0.96939 | 1.094059 | Dusp7     |
| ILMN_1222492 | 0.000155 | 2.10E-06 | 10.20946 | 5.501416 | 1.091809 | Mipep     |
| ILMN_1252601 | 0.000745 | 2.73E-05 | 7.545663 | 2.855514 | 1.089941 | Bcl7a     |
| ILMN_2596499 | 0.001485 | 7.38E-05 | 6.669589 | 1.814773 | 1.086177 | Ldoc1l    |
| ILMN_1231066 | 0.002881 | 1.84E-04 | 5.927416 | 0.854185 | 1.086104 | Hist2h2be |
| ILMN_2954474 | 0.000724 | 2.62E-05 | 7.583249 | 2.89805  | 1.086045 | Enpp2     |
| ILMN_2608174 | 0.001218 | 5.54E-05 | 6.914157 | 2.115086 | 1.085986 | Tmem143   |
| ILMN_1255644 | 0.033062 | 4.88E-03 | 3.655498 | -2.56553 | 1.08589  | Atn1      |
| ILMN_2805372 | 0.000293 | 6.57E-06 | 8.944559 | 4.332529 | 1.084741 | Itgb6     |
| ILMN_2971721 | 0.006035 | 5.15E-04 | 5.158703 | -0.22272 | 1.082261 | Fbrsl1    |

|              |          |          |          |          |          |          |
|--------------|----------|----------|----------|----------|----------|----------|
| ILMN_2627205 | 0.000225 | 4.25E-06 | 9.41308  | 4.782372 | 1.081051 | Zmynd8   |
| ILMN_1232447 | 5.13E-05 | 2.14E-07 | 13.21577 | 7.786946 | 1.080651 | Por      |
| ILMN_1226228 | 0.004445 | 3.36E-04 | 5.47132  | 0.225517 | 1.078697 | Urgcp    |
| ILMN_3115213 | 0.000255 | 5.10E-06 | 9.214611 | 4.594353 | 1.078602 | Irx2     |
| ILMN_1226688 | 0.000225 | 4.24E-06 | 9.416153 | 4.785254 | 1.078183 | Ephx2    |
| ILMN_2799351 | 0.000869 | 3.40E-05 | 7.345452 | 2.626086 | 1.075225 | Acot11   |
| ILMN_3124235 | 6.42E-05 | 3.56E-07 | 12.48619 | 7.286648 | 1.075126 | Sall4    |
| ILMN_2740020 | 0.027825 | 3.88E-03 | 3.799367 | -2.32956 | 1.074457 | Mapt     |
| ILMN_2600465 | 0.00207  | 1.16E-04 | 6.29711  | 1.342129 | 1.072761 | Phactr4  |
| ILMN_1256518 | 0.000159 | 2.24E-06 | 10.13537 | 5.436817 | 1.070078 | Akr7a5   |
| ILMN_2970436 | 0.001372 | 6.56E-05 | 6.768755 | 1.937484 | 1.069763 | Dnajb5   |
| ILMN_2462448 | 0.000508 | 1.53E-05 | 8.092275 | 3.458012 | 1.069234 | Tufm     |
| ILMN_1256369 | 0.00014  | 1.75E-06 | 10.42433 | 5.686243 | 1.068773 | Lynx1    |
| ILMN_2666990 | 0.000412 | 1.11E-05 | 8.408825 | 3.791689 | 1.068227 | Eef1a2   |
| ILMN_2608666 | 0.000868 | 3.39E-05 | 7.347302 | 2.628229 | 1.067273 | Dcaf6    |
| ILMN_1225191 | 0.00047  | 1.38E-05 | 8.19302  | 3.565386 | 1.065081 | Naprt    |
| ILMN_2458442 | 0.00028  | 6.01E-06 | 9.039296 | 4.42518  | 1.064476 | Usp15    |
| ILMN_1212875 | 0.002654 | 1.63E-04 | 6.023218 | 0.982466 | 1.064134 | Arhgef19 |
| ILMN_2772582 | 0.007164 | 6.49E-04 | 4.992791 | -0.46636 | 1.064    | Smad3    |
| ILMN_2973156 | 0.000208 | 3.61E-06 | 9.592175 | 4.948929 | 1.063303 | Esrrg    |
| ILMN_2624328 | 0.000636 | 2.15E-05 | 7.766345 | 3.102888 | 1.062624 | Adamts7  |
| ILMN_1218761 | 0.007458 | 6.82E-04 | 4.958104 | -0.51779 | 1.062588 | Lzts2    |
| ILMN_2611022 | 0.000157 | 2.16E-06 | 10.17716 | 5.473308 | 1.062114 | Bcl11b   |
| ILMN_2791578 | 8.81E-05 | 7.18E-07 | 11.53827 | 6.587576 | 1.060948 | Gspt1    |
| ILMN_2846255 | 0.004624 | 3.56E-04 | 5.427468 | 0.163494 | 1.060293 | Pgpep1   |
| ILMN_2898319 | 0.00011  | 1.14E-06 | 10.9437  | 6.117954 | 1.059688 | Aldh1l2  |

|              |          |          |          |          |          |               |
|--------------|----------|----------|----------|----------|----------|---------------|
| ILMN_2800687 | 0.003656 | 2.56E-04 | 5.676057 | 0.511412 | 1.058712 | Hr            |
| ILMN_2869524 | 0.000235 | 4.51E-06 | 9.34665  | 4.719848 | 1.058241 | Coa7          |
| ILMN_3156010 | 0.002085 | 1.17E-04 | 6.2894   | 1.332147 | 1.058054 | Pdzn3         |
| ILMN_2699488 | 0.046377 | 7.58E-03 | 3.382799 | -3.01743 | 1.057314 | Lamb2         |
| ILMN_2680406 | 0.003684 | 2.58E-04 | 5.668559 | 0.501048 | 1.055478 | Rnf44         |
| ILMN_1246777 | 0.009296 | 9.07E-04 | 4.758874 | -0.81656 | 1.055434 | Ptpm          |
| ILMN_2658266 | 0.030735 | 4.44E-03 | 3.71494  | -2.4678  | 1.05469  | Gpr22         |
| ILMN_2722081 | 0.002885 | 1.85E-04 | 5.925157 | 0.851145 | 1.054284 | Cln3          |
| ILMN_2420353 | 9.03E-05 | 7.76E-07 | 11.4376  | 6.509831 | 1.05354  | C230098O21Rik |
| ILMN_2596479 | 0.001425 | 6.97E-05 | 6.71817  | 1.87505  | 1.052256 | Camk2a        |
| ILMN_2757993 | 2.87E-05 | 5.07E-08 | 15.49424 | 9.168784 | 1.052224 | Dlat          |
| ILMN_1254409 | 0.026928 | 3.72E-03 | 3.825769 | -2.28647 | 1.051952 | Atxn1         |
| ILMN_1227693 | 5.83E-05 | 2.78E-07 | 12.83652 | 7.530764 | 1.051396 | Ints5         |
| ILMN_2804622 | 0.005692 | 4.77E-04 | 5.214033 | -0.14236 | 1.050926 | Med25         |
| ILMN_3107059 | 5.68E-05 | 2.61E-07 | 12.92644 | 7.592252 | 1.050917 | Espn          |
| ILMN_2876712 | 0.002107 | 1.19E-04 | 6.276517 | 1.315448 | 1.050881 | Krba1         |
| ILMN_2669146 | 4.61E-05 | 1.61E-07 | 13.63992 | 8.063967 | 1.049457 | Synrg         |
| ILMN_1227412 | 0.005753 | 4.84E-04 | 5.20358  | -0.15751 | 1.048271 | Ppip5k2       |
| ILMN_1231586 | 0.000245 | 4.81E-06 | 9.277326 | 4.654163 | 1.048262 | Sertad2       |
| ILMN_2509052 | 3.32E-05 | 7.09E-08 | 14.9341  | 8.852114 | 1.047882 | Zfp629        |
| ILMN_2636200 | 0.003631 | 2.53E-04 | 5.683922 | 0.522274 | 1.046373 | Syne1         |
| ILMN_2509817 | 0.000219 | 3.97E-06 | 9.487394 | 4.851837 | 1.045466 | Atp8a1        |
| ILMN_2623844 | 0.00076  | 2.81E-05 | 7.518947 | 2.825177 | 1.045367 | Pkp4          |
| ILMN_1256673 | 0.000324 | 7.77E-06 | 8.770928 | 4.160429 | 1.04476  | Uqcrc1        |
| ILMN_3122427 | 0.002992 | 1.94E-04 | 5.885962 | 0.798275 | 1.044331 | Suc1g2        |
| ILMN_2616709 | 0.029894 | 4.27E-03 | 3.739756 | -2.4271  | 1.044193 | Nisch         |

|              |          |          |          |          |          |           |
|--------------|----------|----------|----------|----------|----------|-----------|
| ILMN_2986051 | 4.46E-05 | 1.43E-07 | 13.8214  | 8.179549 | 1.043803 | Kyat1     |
| ILMN_1257880 | 0.048851 | 8.10E-03 | 3.341865 | -3.08568 | 1.043234 | Itga7     |
| ILMN_1248190 | 5.1E-05  | 1.91E-07 | 13.37924 | 7.894878 | 1.043201 | Mfsd7c    |
| ILMN_1220834 | 0.009164 | 8.91E-04 | 4.77113  | -0.79801 | 1.042659 | Camta2    |
| ILMN_3154640 | 0.000453 | 1.29E-05 | 8.256722 | 3.632707 | 1.04187  | Affl      |
| ILMN_2466316 | 0.00141  | 6.83E-05 | 6.734713 | 1.895504 | 1.041086 | Usp2      |
| ILMN_2608933 | 0.000908 | 3.65E-05 | 7.281261 | 2.5515   | 1.040918 | Tcof1     |
| ILMN_2465338 | 0.006525 | 5.73E-04 | 5.08194  | -0.33495 | 1.040458 | Pigt      |
| ILMN_1212672 | 0.000217 | 3.91E-06 | 9.503685 | 4.866997 | 1.040379 | Elac2     |
| ILMN_2643977 | 0.000179 | 2.73E-06 | 9.905984 | 5.233883 | 1.040234 | Acat1     |
| ILMN_1221298 | 7.81E-05 | 5.31E-07 | 11.938   | 6.889497 | 1.03924  | Tuba8     |
| ILMN_1251595 | 0.001471 | 7.29E-05 | 6.680398 | 1.828211 | 1.038173 | Bhlhb9    |
| ILMN_2764727 | 0.001761 | 9.41E-05 | 6.466857 | 1.559846 | 1.037327 | Actn2     |
| ILMN_2594768 | 0.000257 | 5.16E-06 | 9.202332 | 4.5826   | 1.036134 | Tha1      |
| ILMN_1244995 | 0.00045  | 1.28E-05 | 8.265463 | 3.641911 | 1.035856 | LOC432459 |
| ILMN_1221828 | 0.00762  | 7.01E-04 | 4.938877 | -0.54638 | 1.034555 | Wiz       |
| ILMN_2756286 | 0.000219 | 3.96E-06 | 9.48932  | 4.85363  | 1.033987 | Larp4b    |
| ILMN_2728379 | 0.000262 | 5.32E-06 | 9.168245 | 4.549897 | 1.033724 | Ivd       |
| ILMN_1232998 | 0.000515 | 1.56E-05 | 8.072839 | 3.437169 | 1.033617 | Zak       |
| ILMN_2829935 | 7.81E-05 | 5.28E-07 | 11.94536 | 6.894958 | 1.033015 | Dpysl4    |
| ILMN_2762514 | 0.00094  | 3.83E-05 | 7.237744 | 2.500647 | 1.03249  | Mier2     |
| ILMN_1253596 | 0.003058 | 2.01E-04 | 5.860844 | 0.764279 | 1.032393 | Pi4ka     |
| ILMN_1255561 | 0.000307 | 7.11E-06 | 8.863388 | 4.252446 | 1.031978 | Hspa5     |
| ILMN_2669804 | 0.001062 | 4.59E-05 | 7.078371 | 2.3124   | 1.031887 | Etfdh     |
| ILMN_1245081 | 0.000193 | 3.21E-06 | 9.725352 | 5.070916 | 1.030901 | Otud4     |
| ILMN_1239726 | 0.001384 | 6.67E-05 | 6.755529 | 1.921191 | 1.03086  | Snai3     |



|              |          |          |          |          |          |          |
|--------------|----------|----------|----------|----------|----------|----------|
| ILMN_3146196 | 0.000614 | 2.03E-05 | 7.822021 | 3.164404 | 1.029301 | Akap1    |
| ILMN_2868133 | 0.000334 | 8.21E-06 | 8.713879 | 4.103226 | 1.028963 | Gata6    |
| ILMN_2627299 | 0.000493 | 1.47E-05 | 8.13247  | 3.500986 | 1.028611 | Akap9    |
| ILMN_2921698 | 0.00021  | 3.67E-06 | 9.57494  | 4.933026 | 1.028504 | Pcca     |
| ILMN_2672943 | 8.61E-05 | 6.92E-07 | 11.58533 | 6.623683 | 1.027215 | Cntn2    |
| ILMN_2447042 | 0.0003   | 6.82E-06 | 8.906656 | 4.295215 | 1.027103 | Tnpo3    |
| ILMN_2881681 | 0.00475  | 3.70E-04 | 5.399989 | 0.124487 | 1.02562  | Tnrc6c   |
| ILMN_1226555 | 0.000143 | 1.82E-06 | 10.3789  | 5.647473 | 1.025506 | Inafm2   |
| ILMN_2817864 | 0.00056  | 1.77E-05 | 7.953831 | 3.308631 | 1.025022 | Ckmt2    |
| ILMN_2675464 | 0.000091 | 7.94E-07 | 11.40757 | 6.486497 | 1.024173 | Ankrd17  |
| ILMN_2594855 | 0.001522 | 7.65E-05 | 6.639335 | 1.777078 | 1.024025 | Pdpk1    |
| ILMN_2939652 | 0.000142 | 1.79E-06 | 10.39788 | 5.663693 | 1.023859 | Selenbp2 |
| ILMN_2942669 | 0.00032  | 7.64E-06 | 8.788465 | 4.177948 | 1.023463 | Atp13a1  |
| ILMN_2654068 | 0.000283 | 6.19E-06 | 9.00823  | 4.394895 | 1.023048 | Med23    |
| ILMN_1230454 | 3.87E-05 | 1.03E-07 | 14.32809 | 8.49331  | 1.023045 | Hadhb    |
| ILMN_1222137 | 0.000107 | 1.09E-06 | 10.99956 | 6.163169 | 1.021848 | Kmt2a    |
| ILMN_2484527 | 0.001156 | 5.18E-05 | 6.972481 | 2.18556  | 1.020606 | Vegfa    |
| ILMN_2687032 | 0.001289 | 6.00E-05 | 6.845792 | 2.031922 | 1.019135 | Fbxo31   |
| ILMN_2943165 | 0.004087 | 2.96E-04 | 5.564882 | 0.356918 | 1.017888 | Aqp7     |
| ILMN_3010109 | 0.000224 | 4.16E-06 | 9.436287 | 4.804118 | 1.017149 | Slc25a11 |
| ILMN_3008068 | 0.014484 | 1.65E-03 | 4.353584 | -1.44137 | 1.017006 | Scara5   |
| ILMN_2443129 | 0.000115 | 1.28E-06 | 10.80937 | 6.008283 | 1.015861 | Usp10    |
| ILMN_1227039 | 0.003252 | 2.19E-04 | 5.795959 | 0.676045 | 1.015456 | Dlc1     |
| ILMN_2509623 | 0.000587 | 1.91E-05 | 7.876988 | 3.224789 | 1.013015 | Bptf     |
| ILMN_2557496 | 0.000225 | 4.21E-06 | 9.422322 | 4.791038 | 1.012578 | Ehd2     |
| ILMN_2845080 | 0.019792 | 2.50E-03 | 4.081839 | -1.87238 | 1.012515 | Psap     |

|              |          |          |          |          |          |         |
|--------------|----------|----------|----------|----------|----------|---------|
| ILMN_2991912 | 5.59E-05 | 2.56E-07 | 12.95435 | 7.611237 | 1.011229 | Rab3a   |
| ILMN_2797239 | 0.000159 | 2.26E-06 | 10.12501 | 5.427747 | 1.010848 | Slc12a3 |
| ILMN_2682574 | 0.000155 | 2.10E-06 | 10.2138  | 5.50519  | 1.009212 | Pla2g5  |
| ILMN_2447538 | 0.000552 | 1.73E-05 | 7.972471 | 3.328867 | 1.00889  | Emsy    |
| ILMN_3104414 | 0.001652 | 8.59E-05 | 6.542838 | 1.656032 | 1.008546 | Etfb    |
| ILMN_2800297 | 8.49E-05 | 6.79E-07 | 11.61078 | 6.643147 | 1.008426 | Sart3   |
| ILMN_2713841 | 4.46E-05 | 1.42E-07 | 13.83141 | 8.185877 | 1.00646  | Hspd1   |
| ILMN_1250816 | 3.87E-05 | 1.06E-07 | 14.2829  | 8.465849 | 1.005475 | Apeh    |
| ILMN_1230395 | 0.00012  | 1.37E-06 | 10.72115 | 5.935506 | 1.004239 | C2cd2l  |
| ILMN_2960407 | 0.002398 | 1.42E-04 | 6.134257 | 1.129536 | 1.003498 | Mthfd1  |
| ILMN_2616164 | 0.000283 | 6.17E-06 | 9.011252 | 4.397845 | 1.002263 | Itga3   |
| ILMN_1253259 | 0.00149  | 7.42E-05 | 6.664506 | 1.808448 | 1.002262 | Snx27   |
| ILMN_1237432 | 0.000659 | 2.25E-05 | 7.724648 | 3.056583 | 1.00172  | Atg2a   |
| ILMN_2913989 | 0.00014  | 1.76E-06 | 10.42251 | 5.68469  | 1.001679 | Myzap   |
| ILMN_1230422 | 0.000204 | 3.46E-06 | 9.638624 | 4.991653 | 1.001589 | Ice1    |
| ILMN_2416424 | 7.14E-05 | 4.36E-07 | 12.20257 | 7.08354  | 1.001383 | Wbp1l   |
| ILMN_2605201 | 0.002719 | 1.69E-04 | 5.995644 | 0.945676 | 1.000821 | Klhl30  |
| ILMN_3093150 | 0.000377 | 9.79E-06 | -8.53472 | 3.921427 | -1.00041 | Npm3    |
| ILMN_1229745 | 0.000282 | 6.09E-06 | -9.02603 | 4.412259 | -1.00133 | Sertad4 |
| ILMN_2777319 | 0.017086 | 2.07E-03 | -4.20478 | -1.67625 | -1.00174 | Stc1    |
| ILMN_2654554 | 0.011465 | 1.20E-03 | -4.56905 | -1.10641 | -1.00208 | Fgl2    |
| ILMN_1216042 | 0.00176  | 9.40E-05 | -6.4679  | 1.561177 | -1.00297 | Apoe    |
| ILMN_2739760 | 0.011764 | 1.24E-03 | -4.54378 | -1.14537 | -1.00437 | Prelp   |
| ILMN_2515784 | 0.000434 | 1.22E-05 | -8.31717 | 3.696181 | -1.00468 | Tspan6  |
| ILMN_2501489 | 6.42E-05 | 3.50E-07 | -12.5071 | 7.301415 | -1.00653 | Was     |
| ILMN_2866327 | 0.033492 | 4.96E-03 | -3.64545 | -2.58209 | -1.0071  | Pkd2    |

|              |          |          |          |          |          |           |
|--------------|----------|----------|----------|----------|----------|-----------|
| ILMN_1220996 | 0.00099  | 4.12E-05 | -7.17324 | 2.424838 | -1.00725 | Ptpn6     |
| ILMN_2712075 | 0.03351  | 4.97E-03 | -3.64436 | -2.58387 | -1.00808 | Lcn2      |
| ILMN_2805945 | 0.000111 | 1.18E-06 | -10.9113 | 6.091626 | -1.00828 | Serp1     |
| ILMN_2721357 | 0.004004 | 2.88E-04 | -5.58585 | 0.386191 | -1.00842 | Lhfp12    |
| ILMN_1219213 | 0.010434 | 1.06E-03 | -4.65448 | -0.97534 | -1.00948 | Mfsd11    |
| ILMN_2699898 | 0.014128 | 1.59E-03 | -4.37635 | -1.40569 | -1.00985 | Itgae     |
| ILMN_2594971 | 0.00463  | 3.57E-04 | -5.42588 | 0.161237 | -1.01043 | Rpl38     |
| ILMN_1238314 | 0.004723 | 3.67E-04 | -5.40515 | 0.131822 | -1.01101 | Serpinb1c |
| ILMN_1217143 | 0.041833 | 6.65E-03 | -3.46326 | -2.88355 | -1.01312 | Mbip      |
| ILMN_1245733 | 0.001115 | 4.94E-05 | -7.01406 | 2.235536 | -1.01325 | Ddx49     |
| ILMN_1260262 | 0.001034 | 4.41E-05 | -7.114   | 2.354764 | -1.01391 | Mrpl30    |
| ILMN_1249498 | 0.01978  | 2.49E-03 | -4.08278 | -1.87087 | -1.01528 | Plek      |
| ILMN_2719202 | 0.006669 | 5.90E-04 | -5.06063 | -0.36625 | -1.01674 | Hist1h2bf |
| ILMN_3161639 | 5.13E-05 | 1.96E-07 | -13.3406 | 7.869479 | -1.01681 | Ssna1     |
| ILMN_1256735 | 0.003232 | 2.16E-04 | -5.80382 | 0.686771 | -1.01735 | Gusb      |
| ILMN_2873822 | 0.010853 | 1.11E-03 | -4.61929 | -1.02921 | -1.01889 | Aebp1     |
| ILMN_2724294 | 0.000397 | 1.06E-05 | -8.45351 | 3.837933 | -1.02035 | Gpx7      |
| ILMN_2596834 | 0.000684 | 2.39E-05 | -7.66969 | 2.995238 | -1.02038 | Llph      |
| ILMN_2694955 | 0.022941 | 3.02E-03 | -3.9583  | -2.07126 | -1.02181 | Igfbp4    |
| ILMN_2654682 | 5.13E-05 | 2.22E-07 | -13.1604 | 7.750036 | -1.02184 | Hspa11    |
| ILMN_2660263 | 0.014966 | 1.72E-03 | -4.32496 | -1.48634 | -1.02219 | Bcl2a1b   |
| ILMN_1259294 | 0.004205 | 3.10E-04 | -5.52955 | 0.307445 | -1.02252 | Tmem126b  |
| ILMN_1247592 | 0.004792 | 3.75E-04 | -5.3887  | 0.108424 | -1.02341 | Casp1     |
| ILMN_2611295 | 0.012487 | 1.35E-03 | -4.48724 | -1.23285 | -1.02423 | Dusp26    |
| ILMN_2755008 | 7.64E-05 | 5.03E-07 | -12.0109 | 6.943424 | -1.0256  | Nfkbiz    |
| ILMN_3161936 | 0.000883 | 3.50E-05 | -7.31996 | 2.596525 | -1.02564 | Mpp1      |

|              |          |          |          |          |          |          |
|--------------|----------|----------|----------|----------|----------|----------|
| ILMN_1232458 | 0.000403 | 1.08E-05 | -8.43369 | 3.817445 | -1.02609 | C1qtnf2  |
| ILMN_2633805 | 0.000204 | 3.48E-06 | -9.63472 | 4.988067 | -1.02773 | Mrpl43   |
| ILMN_1248099 | 0.005705 | 4.78E-04 | -5.21175 | -0.14567 | -1.02807 | Col16a1  |
| ILMN_2853508 | 0.003477 | 2.38E-04 | -5.7299  | 0.585602 | -1.02835 | Tmem208  |
| ILMN_1222453 | 0.00857  | 8.14E-04 | -4.83442 | -0.7026  | -1.03044 | Apold1   |
| ILMN_3001076 | 0.003808 | 2.70E-04 | -5.63379 | 0.452886 | -1.03159 | Kmt5a    |
| ILMN_1221274 | 0.002617 | 1.60E-04 | -6.03926 | 1.003814 | -1.0318  | Rab32    |
| ILMN_2636764 | 0.005574 | 4.63E-04 | -5.23517 | -0.11177 | -1.03329 | C1qtnf5  |
| ILMN_1219786 | 0.010032 | 1.00E-03 | -4.69038 | -0.92057 | -1.03463 | Morn2    |
| ILMN_2663585 | 0.027851 | 3.89E-03 | -3.7983  | -2.33129 | -1.03537 | Jdp2     |
| ILMN_1242508 | 0.001039 | 4.44E-05 | -7.10742 | 2.346951 | -1.03681 | Pin4     |
| ILMN_2463181 | 0.019771 | 2.49E-03 | -4.08334 | -1.86998 | -1.0372  | Tnc      |
| ILMN_2933618 | 0.000275 | 5.83E-06 | -9.07066 | 4.455662 | -1.03733 | Gemin7   |
| ILMN_2636116 | 0.005641 | 4.71E-04 | -5.22315 | -0.12915 | -1.03734 | Pdcd5    |
| ILMN_2849359 | 0.000179 | 2.75E-06 | -9.89725 | 5.22607  | -1.03752 | Fam96b   |
| ILMN_2756665 | 0.000826 | 3.17E-05 | -7.40771 | 2.697949 | -1.03874 | Cbr2     |
| ILMN_2749052 | 0.000168 | 2.49E-06 | -10.0153 | 5.331175 | -1.03985 | Ramp3    |
| ILMN_2663130 | 0.001293 | 6.03E-05 | -6.8419  | 2.027168 | -1.04008 | P2ry6    |
| ILMN_2614486 | 0.000606 | 1.99E-05 | -7.84173 | 3.186101 | -1.0408  | Slc50a1  |
| ILMN_1377920 | 5.48E-05 | 2.48E-07 | -13.0017 | 7.643334 | -1.04116 | Eef1a1   |
| ILMN_2641678 | 0.000317 | 7.50E-06 | -8.80752 | 4.196944 | -1.04204 | Bdh2     |
| ILMN_2631663 | 0.000546 | 1.70E-05 | -7.98986 | 3.347713 | -1.04232 | BC022687 |
| ILMN_1254553 | 0.000565 | 1.79E-05 | -7.94001 | 3.293603 | -1.0426  | Pole3    |
| ILMN_3125606 | 8.26E-05 | 6.33E-07 | -11.7029 | 6.713189 | -1.04407 | Ifi27    |
| ILMN_1259470 | 0.00359  | 2.49E-04 | -5.69613 | 0.539118 | -1.04486 | Tmem176b |
| ILMN_3136561 | 0.012604 | 1.37E-03 | -4.47903 | -1.2456  | -1.04552 | Sparc    |

|              |          |          |          |          |          |         |
|--------------|----------|----------|----------|----------|----------|---------|
| ILMN_2834379 | 8.26E-05 | 6.33E-07 | -11.7036 | 6.713771 | -1.04586 | Tgfb1   |
| ILMN_2999762 | 0.00955  | 9.39E-04 | -4.73534 | -0.85222 | -1.04614 | Fmod    |
| ILMN_2710185 | 0.001016 | 4.29E-05 | -7.13719 | 2.382248 | -1.04724 | Myl12b  |
| ILMN_2629455 | 0.000282 | 6.09E-06 | -9.02499 | 4.411243 | -1.04847 | Ptpn    |
| ILMN_2711267 | 0.010427 | 1.05E-03 | -4.65521 | -0.97423 | -1.04995 | Krt18   |
| ILMN_1249366 | 0.00151  | 7.56E-05 | -6.64978 | 1.790104 | -1.05098 | Bcl2    |
| ILMN_2724942 | 0.00895  | 8.63E-04 | -4.79381 | -0.76376 | -1.05123 | Ptgis   |
| ILMN_1252204 | 0.00014  | 1.72E-06 | -10.4464 | 5.705054 | -1.05209 | Sepw1   |
| ILMN_2452717 | 0.004655 | 3.59E-04 | -5.42071 | 0.153908 | -1.05235 | Rab26os |
| ILMN_3091641 | 2.23E-05 | 2.16E-08 | -17.0153 | 9.962833 | -1.0526  | Dab2    |
| ILMN_2690976 | 0.000137 | 1.66E-06 | -10.488  | 5.740316 | -1.05303 | Cdk4    |
| ILMN_1213858 | 0.000799 | 3.00E-05 | -7.45715 | 2.75468  | -1.05419 | Itgb3bp |
| ILMN_1215085 | 0.017345 | 2.10E-03 | -4.19346 | -1.69423 | -1.05443 | Fkbp10  |
| ILMN_2424060 | 0.014627 | 1.67E-03 | -4.34579 | -1.4536  | -1.05565 | Ace     |
| ILMN_3001616 | 0.004106 | 2.98E-04 | -5.55899 | 0.348676 | -1.05656 | Plp2    |
| ILMN_2766580 | 0.000458 | 1.32E-05 | -8.23398 | 3.60872  | -1.05681 | Emc8    |
| ILMN_2683831 | 0.001075 | 4.69E-05 | -7.05932 | 2.289686 | -1.05755 | Mafk    |
| ILMN_1232601 | 0.004822 | 3.79E-04 | -5.38192 | 0.098778 | -1.05841 | Cyb561  |
| ILMN_2702233 | 0.000913 | 3.69E-05 | -7.27261 | 2.541405 | -1.0621  | Ccng1   |
| ILMN_3066673 | 0.032191 | 4.72E-03 | -3.67669 | -2.53065 | -1.06324 | Gm14325 |
| ILMN_2669766 | 0.040738 | 6.42E-03 | -3.48474 | -2.84788 | -1.06362 | Eid1    |
| ILMN_2602406 | 0.000167 | 2.46E-06 | -10.0267 | 5.341259 | -1.06403 | Ptpmt1  |
| ILMN_2707616 | 0.003808 | 2.70E-04 | -5.63422 | 0.453478 | -1.06449 | Col22a1 |
| ILMN_1227972 | 0.001214 | 5.51E-05 | -6.91933 | 2.121356 | -1.06453 | Rps16   |
| ILMN_2759563 | 0.00039  | 1.03E-05 | -8.4838  | 3.869153 | -1.06492 | Gatsl3  |
| ILMN_2655595 | 0.001255 | 5.78E-05 | -6.87747 | 2.070533 | -1.06534 | Crep    |

|              |          |          |          |          |          |          |
|--------------|----------|----------|----------|----------|----------|----------|
| ILMN_2694275 | 0.004143 | 3.02E-04 | -5.54921 | 0.334989 | -1.06537 | Lxn      |
| ILMN_1241496 | 0.000546 | 1.70E-05 | -7.98867 | 3.346418 | -1.06577 | Egfr     |
| ILMN_2681186 | 0.000498 | 1.49E-05 | -8.11597 | 3.483363 | -1.06626 | Rab29    |
| ILMN_1224855 | 0.000492 | 1.46E-05 | -8.13567 | 3.504396 | -1.06787 | Samd9l   |
| ILMN_1248811 | 0.041637 | 6.61E-03 | -3.46694 | -2.87744 | -1.06812 | Ctla2b   |
| ILMN_2679077 | 0.001597 | 8.20E-05 | -6.58099 | 1.704044 | -1.06908 | Nhp2     |
| ILMN_2735961 | 1.56E-05 | 9.30E-09 | -18.6491 | 10.72136 | -1.06956 | Tlr13    |
| ILMN_1260348 | 0.000584 | 1.89E-05 | -7.89097 | 3.240097 | -1.07001 | Srp9     |
| ILMN_2910596 | 0.000155 | 2.09E-06 | -10.2184 | 5.509151 | -1.07158 | Pold4    |
| ILMN_1221936 | 0.000223 | 4.10E-06 | -9.45224 | 4.819041 | -1.07187 | Cox19    |
| ILMN_2661185 | 0.000206 | 3.53E-06 | -9.61625 | 4.9711   | -1.072   | Scml4    |
| ILMN_2608622 | 0.00016  | 2.30E-06 | -10.1059 | 5.411009 | -1.07205 | B3gnt9   |
| ILMN_1260512 | 0.002263 | 1.32E-04 | -6.19459 | 1.20872  | -1.07272 | Mif      |
| ILMN_1233840 | 0.014873 | 1.71E-03 | -4.33012 | -1.47822 | -1.073   | Kif1a    |
| ILMN_2624385 | 0.001301 | 6.09E-05 | -6.83318 | 2.016519 | -1.07317 | Use1     |
| ILMN_2966632 | 0.006312 | 5.48E-04 | -5.11393 | -0.28807 | -1.07364 | Cyb5a    |
| ILMN_2694884 | 0.012612 | 1.37E-03 | -4.47832 | -1.24671 | -1.07364 | Dnaic1   |
| ILMN_2464381 | 0.000362 | 9.27E-06 | -8.58986 | 3.977726 | -1.07478 | Ttc1     |
| ILMN_2895000 | 0.000171 | 2.55E-06 | -9.98345 | 5.30291  | -1.07635 | Slc35c2  |
| ILMN_1215901 | 0.000219 | 3.97E-06 | -9.48854 | 4.852902 | -1.0768  | Agpat2   |
| ILMN_2861493 | 0.000819 | 3.12E-05 | -7.42285 | 2.715349 | -1.07767 | Tceal8   |
| ILMN_2840818 | 0.000467 | 1.36E-05 | -8.20535 | 3.57845  | -1.07817 | Cmpk1    |
| ILMN_1233188 | 0.000952 | 3.90E-05 | -7.22289 | 2.483234 | -1.07823 | Snord123 |
| ILMN_2959291 | 0.00576  | 4.85E-04 | -5.20184 | -0.16003 | -1.07957 | Upp1     |
| ILMN_1239102 | 0.004611 | 3.54E-04 | -5.43142 | 0.1691   | -1.07998 | H2-Eb1   |
| ILMN_3089584 | 0.006554 | 5.77E-04 | -5.07662 | -0.34277 | -1.08087 | Cd74     |

|              |          |          |          |          |          |          |
|--------------|----------|----------|----------|----------|----------|----------|
| ILMN_1247343 | 0.011679 | 1.23E-03 | -4.5511  | -1.13408 | -1.08115 | Lmcd1    |
| ILMN_2950721 | 0.000335 | 8.27E-06 | -8.70685 | 4.096157 | -1.0828  | Smim15   |
| ILMN_2611510 | 0.002866 | 1.83E-04 | -5.9335  | 0.862377 | -1.08285 | Med21    |
| ILMN_2879588 | 2.92E-05 | 5.41E-08 | -15.3854 | 9.108339 | -1.08322 | Lhfp     |
| ILMN_1238868 | 5.13E-05 | 2.20E-07 | -13.1718 | 7.75769  | -1.08334 | Gm5434   |
| ILMN_3085992 | 0.009284 | 9.06E-04 | -4.75996 | -0.81492 | -1.08434 | Ifi202b  |
| ILMN_2688681 | 0.003656 | 2.56E-04 | -5.6754  | 0.510504 | -1.0854  | Npm3-ps1 |
| ILMN_3103689 | 0.000709 | 2.53E-05 | -7.6145  | 2.933295 | -1.087   | Spata24  |
| ILMN_1243525 | 8.51E-05 | 6.83E-07 | -11.6038 | 6.637833 | -1.08915 | Bloc1s6  |
| ILMN_2675669 | 0.000269 | 5.56E-06 | -9.12224 | 4.505583 | -1.09064 | Cd72     |
| ILMN_1250771 | 0.000738 | 2.69E-05 | -7.55721 | 2.868594 | -1.09123 | Prorsd1  |
| ILMN_2669062 | 0.003457 | 2.37E-04 | -5.73519 | 0.592866 | -1.09369 | Pi16     |
| ILMN_1260378 | 0.000104 | 1.00E-06 | -11.1091 | 6.251153 | -1.09378 | Csrp1    |
| ILMN_2878071 | 9.66E-05 | 8.79E-07 | -11.277  | 6.38436  | -1.09471 | Lyz1     |
| ILMN_2742075 | 0.000458 | 1.32E-05 | -8.23456 | 3.609333 | -1.09545 | Cd14     |
| ILMN_3003130 | 0.000386 | 1.02E-05 | -8.49701 | 3.882745 | -1.09575 | Rarres2  |
| ILMN_2725414 | 0.001104 | 4.86E-05 | -7.02767 | 2.251848 | -1.09584 | Cd9      |
| ILMN_2681604 | 0.00419  | 3.09E-04 | -5.53289 | 0.312134 | -1.09662 | Svbp     |
| ILMN_2816137 | 0.00014  | 1.72E-06 | -10.4475 | 5.705911 | -1.09709 | Ppp1r11  |
| ILMN_2799596 | 0.000104 | 9.98E-07 | -11.1155 | 6.256294 | -1.09713 | Vmac     |
| ILMN_1230882 | 0.017141 | 2.08E-03 | -4.20219 | -1.68037 | -1.09716 | Pramel4  |
| ILMN_2701991 | 0.021571 | 2.79E-03 | -4.00992 | -1.98795 | -1.09723 | Rcan1    |
| ILMN_2890357 | 0.002928 | 1.88E-04 | -5.91052 | 0.831429 | -1.0976  | Eva1b    |
| ILMN_2866267 | 0.000531 | 1.63E-05 | -8.03    | 3.391086 | -1.09867 | F2rl1    |
| ILMN_2933914 | 0.001112 | 4.91E-05 | -7.0188  | 2.241223 | -1.09874 | Psmc14   |
| ILMN_2501191 | 9.03E-05 | 7.71E-07 | -11.4449 | 6.515468 | -1.09892 | Sulf1    |

|              |          |          |          |          |          |          |
|--------------|----------|----------|----------|----------|----------|----------|
| ILMN_2718189 | 4.65E-05 | 1.63E-07 | -13.616  | 8.048604 | -1.10002 | Chn2     |
| ILMN_2883392 | 0.001347 | 6.39E-05 | -6.79201 | 1.966068 | -1.10054 | S100a11  |
| ILMN_2776521 | 0.000231 | 4.42E-06 | -9.36925 | 4.74116  | -1.10237 | Dpy30    |
| ILMN_2614644 | 0.001783 | 9.56E-05 | -6.45416 | 1.543702 | -1.106   | Pnlsr    |
| ILMN_2651643 | 0.000266 | 5.46E-06 | -9.14165 | 4.524309 | -1.10694 | Naca     |
| ILMN_2541190 | 8.1E-05  | 6.02E-07 | -11.7691 | 6.763266 | -1.11068 | Ddal     |
| ILMN_1232849 | 3.78E-05 | 9.68E-08 | -14.4284 | 8.553914 | -1.11125 | Cd99     |
| ILMN_1232901 | 0.000125 | 1.46E-06 | -10.6428 | 5.87042  | -1.11268 | Vamp5    |
| ILMN_2497657 | 0.00174  | 9.23E-05 | -6.48319 | 1.580589 | -1.11285 | Xirp2    |
| ILMN_2883164 | 0.000531 | 1.63E-05 | -8.02961 | 3.390657 | -1.11286 | Serpine2 |
| ILMN_2624280 | 8.1E-05  | 6.00E-07 | -11.7747 | 6.767453 | -1.114   | Rps27l   |
| ILMN_2971816 | 2.87E-05 | 4.88E-08 | -15.5584 | 9.204165 | -1.11471 | Gltf     |
| ILMN_2670727 | 0.000296 | 6.68E-06 | -8.92823 | 4.316474 | -1.11474 | Gtf3a    |
| ILMN_2712120 | 0.000223 | 4.12E-06 | -9.44637 | 4.813553 | -1.11711 | S100a6   |
| ILMN_2775030 | 0.000996 | 4.15E-05 | -7.1665  | 2.416891 | -1.11739 | Folr2    |
| ILMN_1248860 | 6.8E-05  | 3.92E-07 | -12.3498 | 7.18963  | -1.11795 | Dpm3     |
| ILMN_1247267 | 0.002268 | 1.32E-04 | -6.1923  | 1.205733 | -1.118   | Smox     |
| ILMN_2642517 | 0.000295 | 6.63E-06 | -8.93599 | 4.324102 | -1.11838 | Medag    |
| ILMN_1228535 | 0.001202 | 5.44E-05 | -6.92934 | 2.133476 | -1.11848 | Pmp22    |
| ILMN_1254516 | 0.001576 | 8.04E-05 | -6.59806 | 1.725453 | -1.12061 | Ntan1    |
| ILMN_2821676 | 0.003602 | 2.50E-04 | -5.69241 | 0.533993 | -1.12212 | Nostrin  |
| ILMN_2810882 | 0.000305 | 7.02E-06 | -8.87579 | 4.264722 | -1.12344 | Ppic     |
| ILMN_2971946 | 0.015457 | 1.80E-03 | -4.29466 | -1.53404 | -1.12546 | Lsm5     |
| ILMN_2672190 | 0.006978 | 6.27E-04 | -5.01804 | -0.42902 | -1.12618 | Id1      |
| ILMN_2850937 | 0.003278 | 2.21E-04 | -5.78753 | 0.664532 | -1.12831 | Tmed3    |
| ILMN_2790097 | 0.000731 | 2.65E-05 | -7.57105 | 2.884264 | -1.12892 | Rhoc     |



|              |          |          |          |          |          |          |
|--------------|----------|----------|----------|----------|----------|----------|
| ILMN_1219253 | 0.000632 | 2.13E-05 | -7.77721 | 3.114917 | -1.12935 | Olfml1   |
| ILMN_2647435 | 0.001383 | 6.65E-05 | -6.75737 | 1.923456 | -1.13107 | Rassf1   |
| ILMN_3070389 | 0.001605 | 8.27E-05 | -6.57449 | 1.695875 | -1.13115 | Gm5796   |
| ILMN_2769884 | 0.002218 | 1.28E-04 | -6.21644 | 1.237281 | -1.13155 | Igf1     |
| ILMN_3129497 | 0.000265 | 5.40E-06 | -9.15405 | 4.536248 | -1.1322  | Nsmf     |
| ILMN_2903379 | 0.003287 | 2.22E-04 | -5.78381 | 0.65945  | -1.13251 | Memo1    |
| ILMN_2944666 | 0.000466 | 1.36E-05 | -8.20925 | 3.582578 | -1.13346 | Ifit3    |
| ILMN_2822141 | 0.000514 | 1.56E-05 | -8.07505 | 3.439547 | -1.13387 | Lym5     |
| ILMN_1242221 | 0.000136 | 1.64E-06 | -10.5065 | 5.755901 | -1.13536 | Ppp1r14b |
| ILMN_2792809 | 5.83E-05 | 2.76E-07 | -12.8465 | 7.537585 | -1.1356  | Arpc5    |
| ILMN_1247990 | 0.025682 | 3.51E-03 | -3.86372 | -2.22466 | -1.13865 | Purb     |
| ILMN_3076439 | 0.001015 | 4.28E-05 | -7.13913 | 2.384537 | -1.13877 | Slc1a2   |
| ILMN_1249976 | 7.81E-05 | 5.43E-07 | -11.9073 | 6.866679 | -1.13938 | Cfl2     |
| ILMN_2634317 | 0.00033  | 8.02E-06 | -8.73775 | 4.127201 | -1.13958 | Slc1a3   |
| ILMN_2956942 | 0.000219 | 3.95E-06 | -9.49265 | 4.856727 | -1.13979 | Prkcdp   |
| ILMN_1248108 | 0.002151 | 1.22E-04 | -6.25222 | 1.283898 | -1.14027 | Lyplal1  |
| ILMN_1253854 | 0.000606 | 1.99E-05 | -7.84009 | 3.184289 | -1.14083 | Tgif1    |
| ILMN_3135801 | 0.000396 | 1.06E-05 | -8.45867 | 3.843251 | -1.14085 | Tmem237  |
| ILMN_2929572 | 3.35E-05 | 7.33E-08 | -14.8789 | 8.820132 | -1.14099 | Ccdc68   |
| ILMN_1233809 | 0.004622 | 3.55E-04 | -5.42875 | 0.165309 | -1.14173 | Cmtm7    |
| ILMN_2715585 | 0.000257 | 5.14E-06 | -9.20586 | 4.585975 | -1.14227 | Cyp20a1  |
| ILMN_1258594 | 0.000622 | 2.07E-05 | -7.80147 | 3.141738 | -1.14325 | Zfp560   |
| ILMN_2642922 | 0.000382 | 9.99E-06 | -8.51431 | 3.900503 | -1.14343 | Mtmr11   |
| ILMN_2704641 | 4.56E-05 | 1.54E-07 | -13.7103 | 8.109003 | -1.14423 | Dph3     |
| ILMN_1236010 | 0.001478 | 7.33E-05 | -6.67479 | 1.821236 | -1.14556 | Bicc1    |
| ILMN_1226525 | 0.005398 | 4.42E-04 | -5.26847 | -0.06372 | -1.14672 | H2-Ab1   |

|              |          |          |          |          |          |         |
|--------------|----------|----------|----------|----------|----------|---------|
| ILMN_1213989 | 0.007416 | 6.76E-04 | -4.96411 | -0.50888 | -1.14723 | Pmepa1  |
| ILMN_2649199 | 0.016958 | 2.04E-03 | -4.21208 | -1.66466 | -1.15054 | Hpgd    |
| ILMN_3163288 | 0.000193 | 3.17E-06 | -9.73741 | 5.081887 | -1.15552 | Egfl7   |
| ILMN_2617468 | 0.009555 | 9.40E-04 | -4.73451 | -0.85348 | -1.15627 | Chac1   |
| ILMN_2629486 | 0.000143 | 1.84E-06 | -10.3702 | 5.640072 | -1.15685 | Srpx    |
| ILMN_1250752 | 0.028862 | 4.07E-03 | -3.76924 | -2.37881 | -1.15804 | Kif23   |
| ILMN_2620804 | 0.00136  | 6.48E-05 | -6.77947 | 1.950668 | -1.15934 | Iah1    |
| ILMN_2901227 | 3.32E-05 | 7.11E-08 | -14.9292 | 8.849264 | -1.16144 | Tmem5   |
| ILMN_2619528 | 0.000455 | 1.31E-05 | -8.24691 | 3.622363 | -1.16153 | Klhl6   |
| ILMN_2914507 | 0.000912 | 3.68E-05 | -7.27508 | 2.544287 | -1.16187 | Ndufb6  |
| ILMN_2858106 | 0.018193 | 2.23E-03 | -4.15413 | -1.75683 | -1.16215 | Tpt1    |
| ILMN_2751492 | 9.03E-05 | 7.69E-07 | -11.4483 | 6.518096 | -1.16302 | Pgap2   |
| ILMN_3130403 | 0.000141 | 1.77E-06 | -10.4147 | 5.678075 | -1.16374 | Smagp   |
| ILMN_2596611 | 1.77E-05 | 1.30E-08 | -17.9809 | 10.42199 | -1.16409 | Clic1   |
| ILMN_1243826 | 0.000335 | 8.22E-06 | -8.71224 | 4.101578 | -1.16595 | Plekha4 |
| ILMN_2454788 | 0.000628 | 2.11E-05 | -7.78682 | 3.125552 | -1.16671 | Wbp1    |
| ILMN_2429025 | 9.13E-05 | 8.21E-07 | -11.3649 | 6.453214 | -1.16763 | Wbp5    |
| ILMN_2705673 | 0.000157 | 2.17E-06 | -10.1747 | 5.47117  | -1.16784 | Spg21   |
| ILMN_3001540 | 0.001451 | 7.15E-05 | -6.69641 | 1.848083 | -1.16993 | Lum     |
| ILMN_2654754 | 0.000468 | 1.37E-05 | -8.19957 | 3.572322 | -1.17015 | Pdpn    |
| ILMN_2827780 | 0.000799 | 3.01E-05 | -7.45657 | 2.754013 | -1.17112 | Phf11d  |
| ILMN_3101732 | 7.21E-05 | 4.46E-07 | -12.1734 | 7.062378 | -1.17374 | Syng1   |
| ILMN_2863837 | 0.000319 | 7.59E-06 | -8.79448 | 4.183946 | -1.17499 | Alox5ap |
| ILMN_1233017 | 0.041096 | 6.50E-03 | -3.47726 | -2.86031 | -1.17575 | Klra9   |
| ILMN_2484707 | 0.000826 | 3.18E-05 | -7.40675 | 2.696838 | -1.17587 | Tyms    |
| ILMN_2609323 | 0.000527 | 1.62E-05 | -8.03915 | 3.400942 | -1.17707 | Lst1    |

|              |          |          |          |          |          |          |
|--------------|----------|----------|----------|----------|----------|----------|
| ILMN_2478202 | 0.000147 | 1.91E-06 | -10.3249 | 5.601204 | -1.17809 | Camta1   |
| ILMN_1249934 | 0.004162 | 3.06E-04 | -5.54156 | 0.324288 | -1.17849 | Gna13    |
| ILMN_1256702 | 0.00324  | 2.17E-04 | -5.80172 | 0.683901 | -1.18221 | S100a10  |
| ILMN_2515363 | 0.000091 | 7.93E-07 | -11.4092 | 6.487749 | -1.185   | Tpm4     |
| ILMN_2684667 | 0.000122 | 1.41E-06 | -10.6914 | 5.910845 | -1.19035 | Slirp    |
| ILMN_2625451 | 0.001295 | 6.04E-05 | -6.84051 | 2.02547  | -1.19077 | Ankrd1   |
| ILMN_2752873 | 0.000209 | 3.65E-06 | -9.5816  | 4.93917  | -1.19213 | Lgals9   |
| ILMN_1250438 | 0.000616 | 2.05E-05 | -7.81368 | 3.155209 | -1.19319 | Marcks11 |
| ILMN_2726837 | 0.003628 | 2.53E-04 | -5.68515 | 0.523966 | -1.1934  | Nppb     |
| ILMN_2733733 | 0.000251 | 4.97E-06 | -9.24138 | 4.619925 | -1.19373 | Tlr2     |
| ILMN_3002745 | 3.78E-05 | 9.19E-08 | -14.5112 | 8.603566 | -1.19573 | Vkorc1   |
| ILMN_2670508 | 5.99E-05 | 3.07E-07 | -12.6926 | 7.431362 | -1.19678 | H2-M3    |
| ILMN_2723718 | 0.000157 | 2.16E-06 | -10.1789 | 5.474788 | -1.1973  | Rcn3     |
| ILMN_2773624 | 0.000104 | 9.79E-07 | -11.1405 | 6.276185 | -1.19834 | Hexa     |
| ILMN_2757445 | 0.000301 | 6.87E-06 | -8.89812 | 4.286792 | -1.19848 | Cep83    |
| ILMN_2860750 | 0.004087 | 2.96E-04 | -5.56474 | 0.356713 | -1.20272 | Snrnp27  |
| ILMN_1259252 | 0.006121 | 5.25E-04 | -5.14397 | -0.24419 | -1.20293 | Anxa1    |
| ILMN_2684874 | 0.00047  | 1.38E-05 | -8.1924  | 3.564726 | -1.20469 | Timm10b  |
| ILMN_2886618 | 0.000397 | 1.06E-05 | -8.45517 | 3.839641 | -1.20549 | Nbl1     |
| ILMN_3145814 | 2.87E-05 | 4.92E-08 | -15.5457 | 9.1972   | -1.2059  | Ogfrl1   |
| ILMN_2914938 | 7.16E-05 | 4.40E-07 | -12.1926 | 7.076331 | -1.20614 | F13a1    |
| ILMN_2939681 | 0.011679 | 1.23E-03 | -4.55111 | -1.13406 | -1.20719 | Lyz2     |
| ILMN_2665008 | 5.68E-05 | 2.64E-07 | -12.9075 | 7.579306 | -1.20942 | Rab31    |
| ILMN_2787172 | 0.011842 | 1.26E-03 | -4.53632 | -1.15689 | -1.20972 | Tpm2     |
| ILMN_2909248 | 9.13E-05 | 8.04E-07 | -11.3914 | 6.473929 | -1.20977 | Vgll2    |
| ILMN_1234223 | 0.000159 | 2.25E-06 | -10.1287 | 5.430975 | -1.21087 | Pld4     |

|              |          |          |          |          |          |            |
|--------------|----------|----------|----------|----------|----------|------------|
| ILMN_2516348 | 0.000844 | 3.26E-05 | -7.38342 | 2.669963 | -1.21109 | Vamp4      |
| ILMN_2711461 | 0.001478 | 7.33E-05 | -6.67477 | 1.821211 | -1.21132 | Tgfb1      |
| ILMN_2748966 | 0.000666 | 2.28E-05 | -7.71093 | 3.041304 | -1.2146  | Tgfb3      |
| ILMN_2730005 | 0.001019 | 4.31E-05 | -7.13417 | 2.378674 | -1.21531 | Rpl29      |
| ILMN_2942989 | 5.13E-05 | 2.19E-07 | -13.1816 | 7.764214 | -1.21661 | Mtpn       |
| ILMN_1225261 | 0.000206 | 3.55E-06 | -9.60983 | 4.96519  | -1.22078 | Uchl1      |
| ILMN_2513826 | 0.000676 | 2.34E-05 | -7.68708 | 3.01469  | -1.22325 | Tnfrsf11b  |
| ILMN_2644719 | 0.002475 | 1.48E-04 | -6.09979 | 1.084065 | -1.2273  | Hmgn3      |
| ILMN_1249242 | 0.00028  | 5.99E-06 | -9.04339 | 4.429164 | -1.23229 | Dnajc2     |
| ILMN_3160770 | 0.000207 | 3.57E-06 | -9.60482 | 4.96058  | -1.23292 | Cd200      |
| ILMN_1256285 | 0.007458 | 6.82E-04 | -4.95804 | -0.51789 | -1.23369 | St6galnac2 |
| ILMN_1242700 | 0.001367 | 6.53E-05 | -6.77297 | 1.94267  | -1.23549 | Spcs3      |
| ILMN_2964042 | 0.025315 | 3.44E-03 | -3.87608 | -2.20456 | -1.23763 | Bgn        |
| ILMN_1251341 | 0.025504 | 3.47E-03 | -3.8699  | -2.21461 | -1.24221 | Ndufc2     |
| ILMN_1214488 | 0.00126  | 5.81E-05 | -6.87309 | 2.065205 | -1.2424  | Pebp1      |
| ILMN_2675811 | 0.002317 | 1.35E-04 | -6.1711  | 1.177957 | -1.24424 | Slc11a1    |
| ILMN_2638114 | 0.00305  | 2.00E-04 | -5.86486 | 0.76972  | -1.24677 | Ptn        |
| ILMN_2695228 | 0.000446 | 1.27E-05 | -8.27598 | 3.652971 | -1.24745 | Fam220a    |
| ILMN_1239380 | 0.000396 | 1.06E-05 | -8.45865 | 3.843231 | -1.24758 | P3h3       |
| ILMN_2592823 | 0.000466 | 1.36E-05 | -8.21001 | 3.583387 | -1.24896 | Cdc42ep5   |
| ILMN_2776431 | 0.000149 | 1.99E-06 | -10.2739 | 5.557277 | -1.25079 | C1qa       |
| ILMN_1227814 | 0.000859 | 3.35E-05 | -7.35929 | 2.642101 | -1.25154 | Srr        |
| ILMN_1246861 | 0.027623 | 3.85E-03 | -3.80497 | -2.32041 | -1.25229 | Ctss       |
| ILMN_2422982 | 0.010139 | 1.02E-03 | -4.68042 | -0.93574 | -1.25484 | Synpo      |
| ILMN_2777270 | 0.004237 | 3.14E-04 | -5.52192 | 0.296741 | -1.25712 | Pfdn4      |
| ILMN_2798138 | 0.000357 | 9.09E-06 | -8.60907 | 3.997272 | -1.25971 | Gipc2      |

|              |          |          |          |          |          |         |
|--------------|----------|----------|----------|----------|----------|---------|
| ILMN_2822000 | 0.004252 | 3.16E-04 | -5.51702 | 0.289857 | -1.26059 | Slc10a6 |
| ILMN_2685516 | 0.000587 | 1.91E-05 | -7.87662 | 3.224391 | -1.26274 | Hcls1   |
| ILMN_1249289 | 0.000196 | 3.26E-06 | -9.70757 | 5.054715 | -1.26316 | Tspan12 |
| ILMN_2660555 | 0.002189 | 1.26E-04 | -6.23077 | 1.255976 | -1.26522 | Bcl2a1d |
| ILMN_1232716 | 0.001578 | 8.06E-05 | -6.5959  | 1.72275  | -1.26692 | Cyp1b1  |
| ILMN_1216133 | 0.000988 | 4.11E-05 | -7.17558 | 2.427602 | -1.2692  | Igsf1   |
| ILMN_2604282 | 0.030238 | 4.34E-03 | -3.72944 | -2.44402 | -1.26929 | Sfrp1   |
| ILMN_2749669 | 0.039277 | 6.12E-03 | -3.51407 | -2.79923 | -1.27123 | Nr1d1   |
| ILMN_2688966 | 0.000742 | 2.71E-05 | -7.55065 | 2.861167 | -1.27184 | Col8a2  |
| ILMN_2806700 | 0.000148 | 1.93E-06 | -10.3094 | 5.58786  | -1.27357 | Cyba    |
| ILMN_2999439 | 0.000434 | 1.22E-05 | -8.31634 | 3.695317 | -1.27454 | Klf4    |
| ILMN_1233545 | 0.013349 | 1.48E-03 | -4.42838 | -1.32439 | -1.27469 | Lbh     |
| ILMN_2947568 | 0.000777 | 2.89E-05 | -7.49393 | 2.796695 | -1.27494 | Gadd45a |
| ILMN_3107690 | 0.000353 | 8.97E-06 | -8.62292 | 4.011335 | -1.27508 | Fam177a |
| ILMN_2706730 | 0.025182 | 3.41E-03 | -3.88098 | -2.19659 | -1.27699 | Ptprr   |
| ILMN_1245307 | 0.005749 | 4.83E-04 | -5.20428 | -0.15649 | -1.27817 | Fbln2   |
| ILMN_1219002 | 0.002522 | 1.52E-04 | -6.08097 | 1.059172 | -1.28066 | Usmg5   |
| ILMN_2986458 | 0.000871 | 3.42E-05 | -7.34091 | 2.620829 | -1.28665 | Terf2ip |
| ILMN_2543929 | 0.00091  | 3.66E-05 | -7.27826 | 2.547996 | -1.28679 | Cenpw   |
| ILMN_1257631 | 6.23E-05 | 3.26E-07 | -12.6058 | 7.370835 | -1.28722 | Apobec1 |
| ILMN_2998976 | 0.00016  | 2.30E-06 | -10.1048 | 5.409988 | -1.28849 | Lpar1   |
| ILMN_1259400 | 4.56E-05 | 1.56E-07 | -13.6853 | 8.093049 | -1.29051 | Prr33   |
| ILMN_2710819 | 5.48E-05 | 2.46E-07 | -13.0115 | 7.649972 | -1.29121 | Csflr   |
| ILMN_2794645 | 0.003617 | 2.52E-04 | -5.68832 | 0.528348 | -1.29214 | Cyr61   |
| ILMN_2757224 | 0.005951 | 5.05E-04 | -5.17207 | -0.20327 | -1.29216 | Srp19   |
| ILMN_2636212 | 0.001693 | 8.84E-05 | -6.51827 | 1.625016 | -1.29356 | Sh3bgrl |

|              |          |          |          |          |          |          |
|--------------|----------|----------|----------|----------|----------|----------|
| ILMN_3049559 | 0.000598 | 1.96E-05 | -7.854   | 3.199572 | -1.2948  | C4b      |
| ILMN_2904686 | 0.006146 | 5.29E-04 | -5.13956 | -0.25062 | -1.29673 | Cyb5r3   |
| ILMN_2757428 | 7.92E-05 | 5.55E-07 | -11.8773 | 6.8443   | -1.2999  | Bloc1s2  |
| ILMN_1260025 | 0.001374 | 6.58E-05 | -6.76631 | 1.934476 | -1.30018 | Map3k7cl |
| ILMN_2672597 | 4.93E-05 | 1.79E-07 | -13.4828 | 7.96252  | -1.30063 | Gng10    |
| ILMN_2443330 | 0.000569 | 1.81E-05 | -7.92884 | 3.28144  | -1.30112 | Ttr      |
| ILMN_2748875 | 5.48E-05 | 2.44E-07 | -13.0206 | 7.656139 | -1.30114 | Fcer1g   |
| ILMN_1229340 | 0.010584 | 1.08E-03 | -4.64173 | -0.99484 | -1.30193 | Triqk    |
| ILMN_2811737 | 0.000321 | 7.66E-06 | -8.78514 | 4.174628 | -1.30666 | Casp4    |
| ILMN_2743244 | 0.003172 | 2.11E-04 | -5.82282 | 0.712644 | -1.30676 | Cd86     |
| ILMN_2642913 | 0.000251 | 4.98E-06 | -9.24067 | 4.619247 | -1.30901 | Emp1     |
| ILMN_2700848 | 0.000113 | 1.22E-06 | -10.8689 | 6.057084 | -1.31499 | Arrb2    |
| ILMN_2803399 | 0.000112 | 1.19E-06 | -10.8977 | 6.080536 | -1.31816 | Mcm6     |
| ILMN_2946088 | 0.001975 | 1.09E-04 | -6.34563 | 1.404758 | -1.31835 | Panx1    |
| ILMN_2921303 | 0.000431 | 1.20E-05 | -8.3309  | 3.710548 | -1.31955 | Tyms-ps  |
| ILMN_2795078 | 4.56E-05 | 1.55E-07 | -13.7009 | 8.103026 | -1.32261 | Unc93b1  |
| ILMN_2675874 | 0.001661 | 8.64E-05 | -6.53798 | 1.649905 | -1.32587 | Alas2    |
| ILMN_2598775 | 4.46E-05 | 1.42E-07 | -13.8281 | 8.183788 | -1.32614 | Stard3nl |
| ILMN_2451022 | 0.002967 | 1.92E-04 | -5.89602 | 0.811859 | -1.32858 | Vim      |
| ILMN_1249032 | 0.000225 | 4.20E-06 | -9.42613 | 4.794602 | -1.33399 | Mzt1     |
| ILMN_3117381 | 0.000345 | 8.66E-06 | -8.65944 | 4.048336 | -1.33845 | Fhl1     |
| ILMN_2771979 | 0.001376 | 6.60E-05 | -6.76471 | 1.932499 | -1.34888 | Dio2     |
| ILMN_2543417 | 0.000807 | 3.05E-05 | -7.44361 | 2.739172 | -1.35125 | Auh      |
| ILMN_2771237 | 0.001757 | 9.37E-05 | -6.47037 | 1.56431  | -1.36091 | Lbp      |
| ILMN_2974343 | 5.83E-05 | 2.78E-07 | -12.8346 | 7.529435 | -1.36313 | Pla1a    |
| ILMN_2687403 | 5.13E-05 | 2.17E-07 | -13.1957 | 7.773596 | -1.36605 | Fcgr3    |

|              |          |          |          |          |          |          |
|--------------|----------|----------|----------|----------|----------|----------|
| ILMN_2625125 | 0.000185 | 2.93E-06 | -9.82822 | 5.164074 | -1.36714 | Cx3cr1   |
| ILMN_2707834 | 7.25E-05 | 4.55E-07 | -12.1467 | 7.042949 | -1.36735 | Rpl13a   |
| ILMN_2667463 | 0.000467 | 1.37E-05 | -8.20327 | 3.576252 | -1.36843 | Ocell    |
| ILMN_2854157 | 0.000327 | 7.87E-06 | -8.75699 | 4.146482 | -1.36999 | Aqp8     |
| ILMN_2720083 | 0.000119 | 1.35E-06 | -10.738  | 5.949435 | -1.37111 | Bace2    |
| ILMN_2718204 | 9.03E-05 | 7.66E-07 | -11.4534 | 6.522077 | -1.37143 | Clec11a  |
| ILMN_1247377 | 0.002065 | 1.15E-04 | -6.30006 | 1.345948 | -1.38238 | Mpeg1    |
| ILMN_2444316 | 0.000414 | 1.12E-05 | -8.39681 | 3.779217 | -1.38284 | Tpm3     |
| ILMN_2657478 | 0.012049 | 1.28E-03 | -4.52124 | -1.18019 | -1.38454 | Cd53     |
| ILMN_1253741 | 0.016764 | 2.02E-03 | -4.22146 | -1.64979 | -1.38503 | Pcolce   |
| ILMN_2987984 | 0.000731 | 2.66E-05 | -7.56857 | 2.88146  | -1.38882 | S100a13  |
| ILMN_1215252 | 5.87E-05 | 2.98E-07 | -12.7343 | 7.460254 | -1.38953 | Bmp4     |
| ILMN_1258770 | 0.000468 | 1.37E-05 | -8.2016  | 3.574481 | -1.39167 | Lrrc51   |
| ILMN_2806159 | 0.000494 | 1.47E-05 | -8.12767 | 3.495867 | -1.39711 | Tmsb4x   |
| ILMN_2792601 | 0.001457 | 7.19E-05 | -6.69171 | 1.842259 | -1.39823 | Lpar6    |
| ILMN_2693403 | 0.000665 | 2.27E-05 | -7.71445 | 3.045224 | -1.39907 | Cela1    |
| ILMN_2950622 | 3.99E-05 | 1.18E-07 | -14.1164 | 8.363813 | -1.39912 | Arhgdig  |
| ILMN_2544890 | 0.000851 | 3.31E-05 | -7.36941 | 2.653793 | -1.39976 | Pde4b    |
| ILMN_2787257 | 0.000179 | 2.72E-06 | -9.91083 | 5.238216 | -1.40099 | Coro1a   |
| ILMN_1227907 | 0.006081 | 5.20E-04 | -5.15061 | -0.23452 | -1.40116 | Gmfg     |
| ILMN_1251071 | 0.000301 | 6.86E-06 | -8.89992 | 4.288574 | -1.402   | Ypel5    |
| ILMN_2885277 | 0.000688 | 2.41E-05 | -7.66225 | 2.986911 | -1.40405 | Nnmt     |
| ILMN_2795412 | 0.000179 | 2.75E-06 | -9.90078 | 5.229231 | -1.40603 | Tmem176a |
| ILMN_1217235 | 0.001543 | 7.81E-05 | -6.62247 | 1.756009 | -1.40752 | Fam114a1 |
| ILMN_2915232 | 0.000334 | 8.17E-06 | -8.71871 | 4.108085 | -1.4105  | Cotl1    |
| ILMN_2857595 | 9.42E-05 | 8.49E-07 | -11.321  | 6.418898 | -1.41486 | AI413582 |

|              |          |          |          |          |          |           |
|--------------|----------|----------|----------|----------|----------|-----------|
| ILMN_2681913 | 0.028864 | 4.07E-03 | -3.76903 | -2.37915 | -1.42446 | Crc1      |
| ILMN_2440530 | 0.025175 | 3.41E-03 | -3.88147 | -2.19579 | -1.42519 | Vat1      |
| ILMN_2993314 | 0.000313 | 7.30E-06 | -8.8357  | 4.224984 | -1.427   | Clec4n    |
| ILMN_1245354 | 0.002617 | 1.60E-04 | -6.03907 | 1.003565 | -1.42861 | Tlr7      |
| ILMN_2671923 | 0.005252 | 4.26E-04 | -5.29506 | -0.02547 | -1.42896 | Ly86      |
| ILMN_2493826 | 0.000121 | 1.39E-06 | -10.7082 | 5.924804 | -1.42939 | Ugt1a10   |
| ILMN_2712892 | 0.030384 | 4.37E-03 | -3.72506 | -2.4512  | -1.42952 | Mir99ahg  |
| ILMN_2829330 | 0.000229 | 4.34E-06 | -9.38878 | 4.759546 | -1.43079 | Hexb      |
| ILMN_2741117 | 0.000167 | 2.48E-06 | -10.0196 | 5.334968 | -1.43193 | Ankrd23   |
| ILMN_1239806 | 0.000777 | 2.89E-05 | -7.49332 | 2.795994 | -1.43239 | Rpa3      |
| ILMN_2984744 | 0.000314 | 7.36E-06 | -8.82682 | 4.216155 | -1.43291 | Emp3      |
| ILMN_2788121 | 7.71E-05 | 5.14E-07 | -11.9818 | 6.921921 | -1.43412 | Dynll1    |
| ILMN_2687169 | 8.36E-05 | 6.56E-07 | -11.6567 | 6.678154 | -1.44183 | Id3       |
| ILMN_1250213 | 0.000109 | 1.14E-06 | -10.952  | 6.124693 | -1.44271 | Sh3glb1   |
| ILMN_1258691 | 0.00029  | 6.45E-06 | -8.96536 | 4.352949 | -1.44459 | Pdzd3     |
| ILMN_2677712 | 8.49E-05 | 6.75E-07 | -11.6192 | 6.649611 | -1.44841 | Arf5      |
| ILMN_2847144 | 0.002189 | 1.26E-04 | -6.23145 | 1.256853 | -1.46081 | Hist1h2ak |
| ILMN_1256676 | 0.021509 | 2.78E-03 | -4.01242 | -1.98392 | -1.46455 | Ddah1     |
| ILMN_2631518 | 0.002107 | 1.19E-04 | -6.27707 | 1.31616  | -1.46623 | Serfl     |
| ILMN_1258629 | 0.00193  | 1.06E-04 | -6.36937 | 1.435283 | -1.46696 | Col3a1    |
| ILMN_1228631 | 0.000638 | 2.16E-05 | -7.76384 | 3.100112 | -1.46782 | Nkd2      |
| ILMN_2479977 | 7.98E-05 | 5.69E-07 | -11.8442 | 6.819585 | -1.46802 | Enho      |
| ILMN_2795040 | 0.001075 | 4.69E-05 | -7.05996 | 2.290448 | -1.47405 | Hist1h2ad |
| ILMN_2904641 | 1.43E-05 | 6.15E-09 | -19.5055 | 11.08481 | -1.47678 | Snora65   |
| ILMN_2650115 | 0.001423 | 6.94E-05 | -6.72146 | 1.879124 | -1.47715 | Adamtsl2  |
| ILMN_2970879 | 1.77E-05 | 1.30E-08 | -17.9863 | 10.42446 | -1.47876 | Uchl3     |



|              |          |          |          |          |          |           |
|--------------|----------|----------|----------|----------|----------|-----------|
| ILMN_2621021 | 0.001536 | 7.76E-05 | -6.62756 | 1.762371 | -1.48053 | Ptpn14    |
| ILMN_2867147 | 0.00019  | 3.09E-06 | -9.76686 | 5.10862  | -1.48177 | Tyrobp    |
| ILMN_2860480 | 3.98E-05 | 1.14E-07 | -14.1658 | 8.394205 | -1.48347 | Arpc1b    |
| ILMN_2588051 | 0.003852 | 2.74E-04 | -5.62223 | 0.436835 | -1.48481 | Tubb2b    |
| ILMN_2733356 | 7.38E-05 | 4.74E-07 | -12.0901 | 7.001575 | -1.48523 | Endod1    |
| ILMN_2903926 | 5.87E-05 | 2.89E-07 | -12.7764 | 7.489391 | -1.48541 | Pdgfrl    |
| ILMN_2650739 | 0.000526 | 1.61E-05 | -8.04218 | 3.404203 | -1.48669 | Arhgap9   |
| ILMN_2838317 | 0.000236 | 4.57E-06 | -9.3329  | 4.706854 | -1.49411 | Pqlc3     |
| ILMN_1246173 | 0.00021  | 3.69E-06 | -9.5696  | 4.928089 | -1.49496 | Msx1      |
| ILMN_1239430 | 0.000152 | 2.04E-06 | -10.2423 | 5.529936 | -1.49646 | Mrc1      |
| ILMN_2880906 | 8.36E-05 | 6.55E-07 | -11.6587 | 6.679685 | -1.49733 | Pdlim2    |
| ILMN_2702303 | 0.002675 | 1.65E-04 | -6.01372 | 0.969812 | -1.49858 | Ch25h     |
| ILMN_2864309 | 0.0108   | 1.10E-03 | -4.62377 | -1.02234 | -1.50501 | Wfdc17    |
| ILMN_2687586 | 8.45E-05 | 6.65E-07 | -11.6387 | 6.664484 | -1.50536 | Cxcl16    |
| ILMN_2789948 | 2.97E-05 | 6.21E-08 | -15.1515 | 8.976676 | -1.5156  | Arhgdib   |
| ILMN_1246056 | 0.00035  | 8.83E-06 | -8.63926 | 4.027903 | -1.51563 | Gngt2     |
| ILMN_2609614 | 6.66E-05 | 3.83E-07 | -12.3842 | 7.214214 | -1.51571 | Snx10     |
| ILMN_1239181 | 0.001156 | 5.18E-05 | -6.97299 | 2.186178 | -1.51662 | Nmral1    |
| ILMN_2898924 | 0.001022 | 4.33E-05 | -7.12832 | 2.371738 | -1.51739 | Kcnj14    |
| ILMN_1241695 | 0.00039  | 1.03E-05 | -8.4837  | 3.869053 | -1.52018 | Ms4a6d    |
| ILMN_1229683 | 0.009107 | 8.85E-04 | -4.77624 | -0.79029 | -1.52176 | Gm9961    |
| ILMN_1234812 | 0.000429 | 1.19E-05 | -8.33543 | 3.715281 | -1.52269 | Dap       |
| ILMN_2730329 | 0.001789 | 9.59E-05 | -6.45094 | 1.539602 | -1.53094 | Hist1h2ah |
| ILMN_2609813 | 0.00149  | 7.43E-05 | -6.66434 | 1.808238 | -1.53126 | Chil1     |
| ILMN_2879382 | 0.000291 | 6.51E-06 | -8.95543 | 4.343206 | -1.53937 | Med10     |
| ILMN_1231506 | 7.38E-05 | 4.72E-07 | -12.0966 | 7.006379 | -1.54099 | Cnrip1    |

|              |          |          |          |          |          |           |
|--------------|----------|----------|----------|----------|----------|-----------|
| ILMN_2757966 | 0.000262 | 5.31E-06 | -9.17153 | 4.553055 | -1.5549  | Pf4       |
| ILMN_1214602 | 0.000183 | 2.84E-06 | -9.86073 | 5.193323 | -1.55836 | Sfrp2     |
| ILMN_1252506 | 2.63E-05 | 3.59E-08 | -16.0935 | 9.492648 | -1.55944 | Fbn1      |
| ILMN_1252757 | 0.000918 | 3.72E-05 | -7.26402 | 2.531376 | -1.55997 | Mllt3     |
| ILMN_2609809 | 0.000257 | 5.15E-06 | -9.204   | 4.584195 | -1.56246 | Sec61b    |
| ILMN_2504823 | 0.001744 | 9.27E-05 | -6.47912 | 1.575416 | -1.56271 | Trim47    |
| ILMN_1251669 | 0.003052 | 2.00E-04 | -5.86381 | 0.768299 | -1.56642 | Evi2a     |
| ILMN_2847787 | 0.000835 | 3.21E-05 | -7.39601 | 2.684477 | -1.57416 | Adgre1    |
| ILMN_2630605 | 0.032077 | 4.69E-03 | -3.6797  | -2.5257  | -1.57483 | Fscn1     |
| ILMN_2877069 | 0.000248 | 4.88E-06 | -9.26315 | 4.640675 | -1.58198 | Tspo      |
| ILMN_2880536 | 0.000546 | 1.70E-05 | -7.9891  | 3.346889 | -1.59426 | Uck2      |
| ILMN_2762944 | 0.001747 | 9.30E-05 | -6.47696 | 1.572679 | -1.59715 | Ifi2712a  |
| ILMN_1247691 | 4.93E-05 | 1.78E-07 | -13.4859 | 7.964529 | -1.60878 | Hes1      |
| ILMN_2983624 | 2.23E-05 | 2.06E-08 | -17.0973 | 10.00313 | -1.61051 | Ackr4     |
| ILMN_2609998 | 3.87E-05 | 1.07E-07 | -14.2723 | 8.459411 | -1.6125  | Fxyd6     |
| ILMN_1246800 | 0.037895 | 5.85E-03 | -3.54273 | -2.75174 | -1.61991 | Serpina3n |
| ILMN_2821460 | 0.00338  | 2.30E-04 | -5.75775 | 0.623806 | -1.62144 | Ptpn18    |
| ILMN_1219574 | 0.003606 | 2.51E-04 | -5.69136 | 0.532545 | -1.62621 | Hist1h2af |
| ILMN_2909150 | 0.007959 | 7.40E-04 | -4.90059 | -0.60346 | -1.62865 | Ctgf      |
| ILMN_2946466 | 0.000106 | 1.04E-06 | -11.0613 | 6.212842 | -1.6299  | Bin1      |
| ILMN_2771766 | 0.013759 | 1.53E-03 | -4.40185 | -1.3658  | -1.63199 | Ccl12     |
| ILMN_2923607 | 0.000225 | 4.22E-06 | -9.41919 | 4.788102 | -1.63372 | Phlda3    |
| ILMN_2804487 | 0.000159 | 2.25E-06 | -10.1331 | 5.434812 | -1.64083 | Aif1      |
| ILMN_3091003 | 0.001165 | 5.23E-05 | -6.96425 | 2.175644 | -1.64225 | Ms4a7     |
| ILMN_2625351 | 6.29E-05 | 3.37E-07 | -12.5611 | 7.339498 | -1.64682 | Sh3bgrl3  |
| ILMN_2699531 | 0.000929 | 3.77E-05 | -7.25138 | 2.516605 | -1.64992 | Rgs10     |

|              |          |          |          |          |          |           |
|--------------|----------|----------|----------|----------|----------|-----------|
| ILMN_2992709 | 2.54E-05 | 2.93E-08 | -16.4567 | 9.681815 | -1.66219 | Trem2     |
| ILMN_2666018 | 0.000139 | 1.70E-06 | -10.4628 | 5.71892  | -1.67826 | Mgp       |
| ILMN_2837802 | 0.00037  | 9.58E-06 | -8.55611 | 3.943304 | -1.69343 | BC028528  |
| ILMN_1225035 | 2.97E-05 | 5.92E-08 | -15.2322 | 9.022347 | -1.69863 | Carhsp1   |
| ILMN_1248830 | 0.001242 | 5.69E-05 | -6.89121 | 2.087238 | -1.70139 | Hist1h2an |
| ILMN_2910934 | 0.00087  | 3.41E-05 | -7.34196 | 2.622044 | -1.70786 | Cd52      |
| ILMN_3145331 | 0.000182 | 2.82E-06 | -9.86906 | 5.200804 | -1.70894 | Tmsb10    |
| ILMN_2836654 | 0.002378 | 1.40E-04 | -6.14442 | 1.142917 | -1.71016 | Hist1h2ap |
| ILMN_2869110 | 0.000264 | 5.36E-06 | -9.16051 | 4.542459 | -1.71471 | Comp      |
| ILMN_1237364 | 2.23E-05 | 2.23E-08 | -16.9514 | 9.931298 | -1.71979 | Mmp23     |
| ILMN_2702193 | 3.49E-05 | 7.86E-08 | -14.7653 | 8.75391  | -1.72206 | Mxra7     |
| ILMN_1232884 | 0.000118 | 1.34E-06 | -10.7517 | 5.960802 | -1.74041 | Sphk1     |
| ILMN_1238276 | 0.000892 | 3.55E-05 | -7.3067  | 2.581123 | -1.74974 | Hist1h2ai |
| ILMN_1213286 | 3.78E-05 | 9.49E-08 | -14.4609 | 8.573452 | -1.75313 | Ccl21a    |
| ILMN_2715840 | 6.66E-05 | 3.81E-07 | -12.3894 | 7.217897 | -1.77499 | C1qc      |
| ILMN_2899599 | 0.030784 | 4.45E-03 | -3.71347 | -2.47021 | -1.78245 | Ddx3y     |
| ILMN_2538422 | 0.002047 | 1.14E-04 | -6.30858 | 1.356969 | -1.78247 | Adap1     |
| ILMN_1241350 | 0.00027  | 5.61E-06 | -9.11239 | 4.496066 | -1.79714 | Vsig4     |
| ILMN_1254082 | 0.000178 | 2.71E-06 | -9.91617 | 5.242986 | -1.80037 | Chodl     |
| ILMN_2689790 | 0.000629 | 2.11E-05 | -7.78538 | 3.123957 | -1.80328 | Igfbp6    |
| ILMN_2831436 | 3.99E-05 | 1.20E-07 | -14.092  | 8.348703 | -1.81391 | Fcrls     |
| ILMN_2918838 | 0.001868 | 1.01E-04 | -6.40669 | 1.483119 | -1.81462 | Ptms      |
| ILMN_2619620 | 3.67E-05 | 8.59E-08 | -14.6202 | 8.668405 | -1.83123 | C1qb      |
| ILMN_1220034 | 0.004495 | 3.41E-04 | -5.45998 | 0.209499 | -1.8399  | Junb      |
| ILMN_2839569 | 2.23E-05 | 2.11E-08 | -17.0522 | 9.980988 | -1.84331 | Ctsz      |
| ILMN_2782964 | 5.13E-05 | 2.21E-07 | -13.1664 | 7.75408  | -1.84491 | Enpp1     |

|              |          |          |          |          |          |              |
|--------------|----------|----------|----------|----------|----------|--------------|
| ILMN_2927638 | 0.001616 | 8.35E-05 | -6.5658  | 1.684951 | -1.84566 | Mxra8        |
| ILMN_2623983 | 0.014373 | 1.63E-03 | -4.36088 | -1.42993 | -1.84945 | Egr2         |
| ILMN_2738825 | 0.004589 | 3.52E-04 | -5.4355  | 0.174873 | -1.85726 | Acta1        |
| ILMN_2691567 | 2.79E-05 | 4.44E-08 | -15.7236 | 9.29451  | -1.85903 | Hyl          |
| ILMN_2602139 | 1.77E-05 | 1.27E-08 | -18.0251 | 10.44222 | -1.85949 | LOC100041504 |
| ILMN_2711163 | 0.000146 | 1.90E-06 | -10.3317 | 5.607    | -1.86331 | Ctsk         |
| ILMN_1233455 | 4.61E-05 | 1.61E-07 | -13.6416 | 8.065037 | -1.87389 | Olfml3       |
| ILMN_2543688 | 0.000207 | 3.57E-06 | -9.6044  | 4.960189 | -1.88017 | Snhg18       |
| ILMN_2658501 | 8.26E-05 | 6.40E-07 | -11.6885 | 6.702327 | -1.88333 | Ifitm3       |
| ILMN_1223317 | 0.000145 | 1.87E-06 | -10.3508 | 5.623448 | -1.89301 | Lgals3       |
| ILMN_2691951 | 0.001195 | 5.40E-05 | -6.93583 | 2.141319 | -1.8966  | Svep1        |
| ILMN_3127595 | 0.00016  | 2.29E-06 | -10.1125 | 5.416779 | -1.90172 | Lman11       |
| ILMN_1226016 | 0.000285 | 6.26E-06 | -8.9969  | 4.383824 | -1.90649 | Scx          |
| ILMN_2967266 | 0.000115 | 1.27E-06 | -10.811  | 6.009621 | -1.91127 | Fxyd5        |
| ILMN_2639239 | 4.46E-05 | 1.40E-07 | -13.8464 | 8.195317 | -1.91279 | Serpinf1     |
| ILMN_3161547 | 0.00324  | 2.17E-04 | -5.80152 | 0.683631 | -1.94507 | Nppa         |
| ILMN_2817714 | 8.49E-05 | 6.72E-07 | -11.6233 | 6.652736 | -1.95617 | Tspan17      |
| ILMN_2969845 | 3.77E-05 | 9.07E-08 | -14.5324 | 8.616208 | -1.99371 | Ccl21c       |
| ILMN_1246153 | 0.000217 | 3.87E-06 | -9.51648 | 4.878885 | -2.01231 | Erdr1        |
| ILMN_2870864 | 2.63E-05 | 3.61E-08 | -16.0851 | 9.488222 | -2.0316  | Pamr1        |
| ILMN_1247811 | 5.13E-05 | 2.04E-07 | -13.2843 | 7.832386 | -2.06244 | Ass1         |
| ILMN_2852957 | 0.000105 | 1.02E-06 | -11.0868 | 6.233349 | -2.07019 | Dkk3         |
| ILMN_1238886 | 0.000118 | 1.34E-06 | -10.7526 | 5.961527 | -2.11169 | Ccl8         |
| ILMN_2690603 | 7.99E-05 | 5.73E-07 | -11.8345 | 6.812341 | -2.13109 | Spp1         |
| ILMN_2735350 | 0.011574 | 1.21E-03 | -4.56078 | -1.11915 | -2.14944 | Gdf15        |
| ILMN_2615412 | 0.000149 | 1.95E-06 | -10.2986 | 5.57858  | -2.14989 | Gngl3        |

|              |          |          |          |          |          |         |
|--------------|----------|----------|----------|----------|----------|---------|
| ILMN_2646052 | 0.000223 | 4.11E-06 | -9.44858 | 4.815621 | -2.15327 | C4a     |
| ILMN_2833163 | 0.000489 | 1.45E-05 | -8.14369 | 3.512952 | -2.16459 | Fam180a |
| ILMN_2773113 | 5.87E-05 | 2.93E-07 | -12.76   | 7.478056 | -2.18199 | Capg    |
| ILMN_2663249 | 6.84E-05 | 3.98E-07 | -12.3297 | 7.175203 | -2.19108 | Slamf9  |
| ILMN_2750515 | 0.000106 | 1.05E-06 | -11.0551 | 6.207885 | -2.192   | Fos     |
| ILMN_2997494 | 0.002953 | 1.91E-04 | -5.90184 | 0.819724 | -2.25563 | Lox     |
| ILMN_2818294 | 0.000243 | 4.75E-06 | -9.29143 | 4.667559 | -2.2673  | Srpx2   |
| ILMN_2724880 | 0.035326 | 5.35E-03 | -3.59762 | -2.66099 | -2.30384 | Nmrk2   |
| ILMN_2734683 | 0.000379 | 9.84E-06 | -8.52902 | 3.915591 | -2.3201  | Fstl1   |
| ILMN_2806065 | 0.000144 | 1.85E-06 | -10.3609 | 5.632039 | -2.32045 | Ankrd2  |
| ILMN_2698499 | 5.33E-05 | 2.34E-07 | -13.0812 | 7.696952 | -2.36598 | Nox4    |
| ILMN_1213886 | 6.42E-05 | 3.59E-07 | -12.474  | 7.277991 | -2.48595 | Meox1   |
| ILMN_3103896 | 0.005086 | 4.08E-04 | -5.3268  | 0.020066 | -2.56184 | Timp1   |
| ILMN_1238433 | 1.56E-05 | 8.70E-09 | -18.7837 | 10.77995 | -2.58965 | Rbp1    |
| ILMN_1225835 | 2.79E-05 | 4.37E-08 | -15.7513 | 9.309521 | -2.63529 | Mfap5   |
| ILMN_2633350 | 0.000138 | 1.69E-06 | -10.4661 | 5.721736 | -2.67376 | Mfap4   |
| ILMN_2747811 | 0.00033  | 8.00E-06 | -8.74039 | 4.129849 | -2.76013 | Crlf1   |
| ILMN_2742042 | 5.13E-05 | 2.05E-07 | -13.2756 | 7.826629 | -2.84461 | Nupr1   |
| ILMN_2503553 | 2.54E-05 | 3.06E-08 | -16.3766 | 9.640541 | -3.03408 | Col8a1  |
| ILMN_2486906 | 8.9E-05  | 7.39E-07 | -11.5004 | 6.558389 | -3.28501 | Wisp2   |
| ILMN_2636424 | 5.68E-06 | 3.76E-10 | -26.3675 | 13.35165 | -3.37448 | Itgb11  |
| ILMN_1227100 | 4.26E-06 | 9.41E-11 | -30.593  | 14.33415 | -3.6075  | Uba6    |

---

Table S1. GO analysis of DEGs in VO group of up-regulated differential gene.

| Ontology | ID         | Description                                             | GeneRatio | BgRatio   | pvalue   | p.adjust | qvalue |
|----------|------------|---------------------------------------------------------|-----------|-----------|----------|----------|--------|
| BP       | GO:0006790 | sulfur compound metabolic process                       | 5/35      | 272/23210 | 5.19e-05 | 0.028    | 0.024  |
| BP       | GO:0006749 | glutathione metabolic process                           | 3/35      | 59/23210  | 9.64e-05 | 0.028    | 0.024  |
| BP       | GO:0035634 | response to stilbenoid                                  | 2/35      | 22/23210  | 5.01e-04 | 0.092    | 0.079  |
| BP       | GO:0006805 | xenobiotic metabolic process                            | 3/35      | 112/23210 | 6.40e-04 | 0.092    | 0.079  |
| MF       | GO:0004364 | glutathione transferase activity                        | 3/35      | 32/22710  | 1.61e-05 | 0.002    | 0.001  |
|          |            | transferase activity, transferring alkyl or aryl (other |           |           |          |          |        |
| MF       | GO:0016765 | than methyl) groups                                     | 3/35      | 61/22710  | 1.14e-04 | 0.006    | 0.004  |
| MF       | GO:0043295 | glutathione binding                                     | 2/35      | 17/22710  | 3.09e-04 | 0.008    | 0.006  |
| MF       | GO:1900750 | oligopeptide binding                                    | 2/35      | 17/22710  | 3.09e-04 | 0.008    | 0.006  |
| KEGG     | mmu00480   | Glutathione metabolism                                  | 3/14      | 71/8910   | 1.66e-04 | 0.003    | 0.002  |
| KEGG     | mmu00982   | Drug metabolism - cytochrome P450                       | 3/14      | 71/8910   | 1.66e-04 | 0.003    | 0.002  |
| KEGG     | mmu00980   | Metabolism of xenobiotics by cytochrome P450            | 3/14      | 73/8910   | 1.80e-04 | 0.003    | 0.002  |
| KEGG     | mmu01524   | Platinum drug resistance                                | 3/14      | 80/8910   | 2.36e-04 | 0.003    | 0.002  |

Table S2. GO analysis of DEGs in VO group of down-regulated differential gene.

| Ontology | ID         | Description                                        | GeneRatio | BgRatio   | pvalue   | p.adjust | qvalue   |
|----------|------------|----------------------------------------------------|-----------|-----------|----------|----------|----------|
| BP       | GO:0007005 | mitochondrion organization                         | 151/2381  | 459/23210 | 1.13e-40 | 6.61e-37 | 5.09e-37 |
| BP       | GO:0072594 | establishment of protein localization to organelle | 115/2381  | 374/23210 | 3.15e-28 | 9.23e-25 | 7.10e-25 |
| BP       | GO:0009259 | ribonucleotide metabolic process                   | 123/2381  | 433/23210 | 1.39e-26 | 2.10e-23 | 1.62e-23 |
| CC       | GO:0005759 | mitochondrial matrix                               | 148/2416  | 264/23436 | 2.22e-76 | 1.63e-73 | 1.18e-73 |
| CC       | GO:0098798 | mitochondrial protein complex                      | 128/2416  | 263/23436 | 1.42e-56 | 5.24e-54 | 3.80e-54 |
| CC       | GO:0005743 | mitochondrial inner membrane                       | 162/2416  | 433/23436 | 8.50e-52 | 2.08e-49 | 1.51e-49 |
| MF       | GO:0050662 | coenzyme binding                                   | 85/2363   | 288/22710 | 1.58e-19 | 1.73e-16 | 1.29e-16 |

|      |            |                                            |         |           |          |          |          |
|------|------------|--------------------------------------------|---------|-----------|----------|----------|----------|
| MF   | GO:0003735 | structural constituent of ribosome         | 63/2363 | 182/22710 | 1.23e-18 | 6.76e-16 | 5.05e-16 |
| MF   | GO:0051082 | unfolded protein binding                   | 37/2363 | 97/22710  | 5.17e-13 | 1.89e-10 | 1.41e-10 |
| KEGG | mmu04146   | Peroxisome                                 | 41/1165 | 86/8910   | 5.07e-15 | 1.59e-12 | 1.31e-12 |
| KEGG | mmu00280   | Valine, leucine and isoleucine degradation | 30/1165 | 57/8910   | 8.93e-13 | 1.40e-10 | 1.15e-10 |
| KEGG | mmu00640   | Propanoate metabolism                      | 21/1165 | 34/8910   | 4.03e-11 | 4.22e-09 | 3.46e-09 |

Table S3. GO analysis of DEGs in TAC group of up-regulated differential gene.

| Ontology | ID         | Description                       | GeneRatio | BgRatio   | pvalue   | p.adjust | qvalue   |
|----------|------------|-----------------------------------|-----------|-----------|----------|----------|----------|
| BP       | GO:0016054 | organic acid catabolic process    | 31/564    | 213/23210 | 1.21e-15 | 2.40e-12 | 1.77e-12 |
| BP       | GO:0046395 | carboxylic acid catabolic process | 31/564    | 213/23210 | 1.21e-15 | 2.40e-12 | 1.77e-12 |
| BP       | GO:0019395 | fatty acid oxidation              | 22/564    | 98/23210  | 1.62e-15 | 2.40e-12 | 1.77e-12 |
| CC       | GO:0042383 | sarcolemma                        | 28/571    | 163/23436 | 4.01e-16 | 2.20e-13 | 1.59e-13 |
| CC       | GO:0005759 | mitochondrial matrix              | 32/571    | 264/23436 | 8.73e-14 | 2.40e-11 | 1.74e-11 |
| CC       | GO:0019866 | organelle inner membrane          | 43/571    | 475/23436 | 1.58e-13 | 2.88e-11 | 2.09e-11 |
| MF       | GO:0050662 | coenzyme binding                  | 32/568    | 288/22710 | 1.92e-12 | 1.53e-09 | 1.14e-09 |
| MF       | GO:0003779 | actin binding                     | 34/568    | 428/22710 | 3.54e-09 | 1.41e-06 | 1.05e-06 |
| MF       | GO:0003995 | acyl-CoA dehydrogenase activity   | 6/568     | 10/22710  | 4.60e-08 | 1.22e-05 | 9.10e-06 |
|          |            | Valine, leucine and isoleucine    |           |           |          |          |          |
| KEGG     | mmu00280   | degradation                       | 14/294    | 57/8910   | 2.86e-09 | 7.81e-07 | 6.23e-07 |
| KEGG     | mmu00640   | Propanoate metabolism             | 11/294    | 34/8910   | 6.10e-09 | 8.32e-07 | 6.64e-07 |
| KEGG     | mmu04931   | Insulin resistance                | 18/294    | 110/8910  | 1.64e-08 | 1.50e-06 | 1.19e-06 |

Table S4. GO analysis of DEGs in TAC group of down-regulated differential gene.

| Ontology | ID         | Description         | GeneRatio | BgRatio   | pvalue   | p.adjust | qvalue   |
|----------|------------|---------------------|-----------|-----------|----------|----------|----------|
| BP       | GO:0050900 | leukocyte migration | 32/455    | 340/23210 | 2.60e-13 | 1.12e-09 | 7.69e-10 |

|      |            |                                             |        |           |          |          |          |
|------|------------|---------------------------------------------|--------|-----------|----------|----------|----------|
| BP   | GO:0030595 | leukocyte chemotaxis                        | 25/455 | 211/23210 | 6.93e-13 | 1.50e-09 | 1.02e-09 |
| BP   | GO:0060326 | cell chemotaxis                             | 29/455 | 299/23210 | 1.66e-12 | 2.39e-09 | 1.64e-09 |
| CC   | GO:0062023 | collagen-containing extracellular matrix    | 43/463 | 359/23436 | 2.32e-21 | 1.01e-18 | 8.11e-19 |
| CC   | GO:0031012 | extracellular matrix                        | 48/463 | 475/23436 | 1.45e-20 | 3.16e-18 | 2.54e-18 |
| CC   | GO:0045335 | phagocytic vesicle                          | 12/463 | 89/23436  | 1.84e-07 | 2.66e-05 | 2.14e-05 |
| MF   | GO:0005201 | extracellular matrix structural constituent | 18/442 | 140/22710 | 2.75e-10 | 1.82e-07 | 1.55e-07 |
| MF   | GO:0005539 | glycosaminoglycan binding                   | 19/442 | 208/22710 | 2.83e-08 | 9.38e-06 | 7.98e-06 |
| MF   | GO:0051015 | actin filament binding                      | 18/442 | 200/22710 | 8.25e-08 | 1.82e-05 | 1.55e-05 |
| KEGG | mmu05140   | Leishmaniasis                               | 11/221 | 70/8910   | 1.02e-06 | 2.54e-04 | 2.21e-04 |
| KEGG | mmu05152   | Tuberculosis                                | 15/221 | 180/8910  | 3.90e-05 | 0.005    | 0.004    |
| KEGG | mmu05133   | Pertussis                                   | 9/221  | 77/8910   | 1.13e-04 | 0.009    | 0.008    |

---



Table S5. GO analysis of DEGs in VO and TAC groups with same regulation.

| ONTOLO |          |                                                                               | GeneRati |          |          |          |          |
|--------|----------|-------------------------------------------------------------------------------|----------|----------|----------|----------|----------|
| GY     | ID       | Description                                                                   | o        | BgRatio  | pvalue   | p.adjust | qvalue   |
| BP     | GO:00450 | protein targeting to ER                                                       | 3/46     | 33/23210 | 3.8126E- | 0.022316 | 0.016527 |
|        | 47       |                                                                               |          |          | 05       | 21       | 36       |
| BP     | GO:00725 | establishment of protein localization to endoplasmic reticulum                | 3/46     | 37/23210 | 5.3996E- | 0.022316 | 0.016527 |
|        | 99       |                                                                               |          |          | 05       | 21       | 36       |
| BP     | GO:00313 | negative regulation of defense response                                       | 5/46     | 0        | 220/2321 | 7.3033E- | 0.022316 |
|        | 48       |                                                                               |          |          | 05       | 21       | 36       |
| BP     | GO:00901 | establishment of protein localization to membrane                             | 5/46     | 0        | 223/2321 | 7.7855E- | 0.022316 |
|        | 50       |                                                                               |          |          | 05       | 21       | 36       |
| BP     | GO:00102 | NADH dehydrogenase complex assembly                                           | 3/46     | 45/23210 | 9.7522E- | 0.022316 | 0.016527 |
|        | 57       |                                                                               |          |          | 05       | 21       | 36       |
| BP     | GO:00329 | mitochondrial respiratory chain complex I assembly                            | 3/46     | 45/23210 | 9.7522E- | 0.022316 | 0.016527 |
|        | 81       |                                                                               |          |          | 05       | 21       | 36       |
| BP     | GO:20012 | regulation of apoptotic signaling pathway                                     | 6/46     | 0        | 414/2321 | 0.000159 | 0.029379 |
|        | 33       |                                                                               |          |          | 0.000171 | 0.029379 | 0.021758 |
| BP     | GO:19037 | positive regulation of establishment of protein localization to mitochondrion | 2/46     | 10/23210 | 18       | 18       | 18       |
|        | 49       |                                                                               |          |          | 0.000208 | 0.030085 | 0.022281 |
| BP     | GO:01500 | negative regulation of neuroinflammatory response                             | 2/46     | 11/23210 | 96       | 83       | 53       |
|        | 79       |                                                                               |          |          | 0.000219 | 0.030085 | 0.022281 |
| BP     | GO:00709 | protein localization to endoplasmic reticulum                                 | 3/46     | 59/23210 | 12       | 83       | 53       |
|        | 72       |                                                                               |          |          | 158/2321 | 0.000270 | 0.030838 |
| BP     | GO:00086 | phospholipid biosynthetic process                                             | 4/46     | 0        | 02       | 03       | 61       |
|        | 54       |                                                                               |          |          | 0.000277 | 0.030838 | 0.022838 |
| BP     | GO:00070 | mitochondrion organization                                                    | 6/46     | 459/2321 |          |          |          |

|    |          |                                                             |      |          |          |          |          |
|----|----------|-------------------------------------------------------------|------|----------|----------|----------|----------|
|    | 05       |                                                             |      | 0        | 47       | 03       | 61       |
|    | GO:01500 |                                                             |      |          | 0.000291 | 0.030838 | 0.022838 |
| BP | 76       | neuroinflammatory response                                  | 3/46 | 65/23210 | 98       | 03       | 61       |
|    | GO:00331 |                                                             |      |          | 0.000480 | 0.035691 | 0.026433 |
| BP | 08       | mitochondrial respiratory chain complex assembly            | 3/46 | 77/23210 | 92       | 44       | 03       |
|    | GO:00066 |                                                             |      |          | 0.000512 | 0.035691 | 0.026433 |
| BP | 14       | SRP-dependent cotranslational protein targeting to membrane | 2/46 | 17/23210 | 8        | 44       | 03       |
|    | GO:00708 |                                                             |      |          | 0.000512 | 0.035691 | 0.026433 |
| BP | 86       | positive regulation of calcineurin-NFAT signaling cascade   | 2/46 | 17/23210 | 8        | 44       | 03       |
|    | GO:01060 |                                                             |      |          | 0.000512 | 0.035691 | 0.026433 |
| BP | 58       | positive regulation of calcineurin-mediated signaling       | 2/46 | 17/23210 | 8        | 44       | 03       |
|    | GO:00380 |                                                             |      |          | 0.000518 | 0.035691 | 0.026433 |
| BP | 34       | signal transduction in absence of ligand                    | 3/46 | 79/23210 | 46       | 44       | 03       |
|    | GO:00971 |                                                             |      |          | 0.000518 | 0.035691 | 0.026433 |
| BP | 92       | extrinsic apoptotic signaling pathway in absence of ligand  | 3/46 | 79/23210 | 46       | 44       | 03       |
|    | GO:00321 |                                                             |      | 336/2321 | 0.000519 | 0.035691 | 0.026433 |
| BP | 02       | negative regulation of response to external stimulus        | 5/46 | 0        | 9        | 44       | 03       |
|    | GO:00066 |                                                             |      |          | 0.000576 | 0.037670 | 0.027898 |
| BP | 13       | cotranslational protein targeting to membrane               | 2/46 | 18/23210 | 17       | 51       | 73       |
|    | GO:20003 |                                                             |      | 200/2321 | 0.000657 | 0.041051 | 0.030403 |
| BP | 77       | regulation of reactive oxygen species metabolic process     | 4/46 | 0        | 79       | 95       | 03       |
|    | GO:00061 |                                                             |      |          | 0.000787 | 0.045070 | 0.033379 |
| BP | 20       | mitochondrial electron transport, NADH to ubiquinone        | 2/46 | 21/23210 | 83       | 58       | 22       |
|    | GO:19012 |                                                             |      |          | 0.000787 | 0.045070 | 0.033379 |
| BP | 23       | negative regulation of NIK/NF-kappaB signaling              | 2/46 | 21/23210 | 83       | 58       | 22       |
| BP | GO:00725 | establishment of protein localization to organelle          | 5/46 | 374/2321 | 0.000842 | 0.045706 | 0.033850 |

|    |          |                                                                      |      |          |          |          |          |
|----|----------|----------------------------------------------------------------------|------|----------|----------|----------|----------|
|    | 94       |                                                                      |      | 0        | 68       | 27       | 01       |
|    | GO:00326 |                                                                      |      |          | 0.000865 | 0.045706 | 0.033850 |
| BP | 91       | negative regulation of interleukin-1 beta production                 | 2/46 | 22/23210 | 52       | 27       | 01       |
|    | GO:20012 |                                                                      |      |          | 0.000971 | 0.048228 | 0.035718 |
| BP | 37       | negative regulation of extrinsic apoptotic signaling pathway         | 3/46 | 98/23210 | 31       | 96       | 31       |
|    | GO:00506 |                                                                      |      |          | 0.001031 | 0.048228 | 0.035718 |
| BP | 87       | negative regulation of defense response to virus                     | 2/46 | 24/23210 | 53       | 96       | 31       |
|    | GO:01500 |                                                                      |      |          | 0.001119 | 0.048228 | 0.035718 |
| BP | 77       | regulation of neuroinflammatory response                             | 2/46 | 25/23210 | 81       | 96       | 31       |
|    | GO:19037 |                                                                      |      |          | 0.001119 | 0.048228 | 0.035718 |
| BP | 47       | regulation of establishment of protein localization to mitochondrion | 2/46 | 25/23210 | 81       | 96       | 31       |
|    | GO:19034 |                                                                      |      | 103/2321 | 0.001121 | 0.048228 | 0.035718 |
| BP | 26       | regulation of reactive oxygen species biosynthetic process           | 3/46 | 0        | 62       | 96       | 31       |
|    | GO:20012 |                                                                      |      | 231/2321 | 0.001124 | 0.048228 | 0.035718 |
| BP | 34       | negative regulation of apoptotic signaling pathway                   | 4/46 | 0        | 05       | 96       | 31       |
|    | GO:00464 |                                                                      |      | 106/2321 | 0.001218 | 0.050695 | 0.037545 |
| BP | 74       | glycerophospholipid biosynthetic process                             | 3/46 | 0        | 47       | 68       | 16       |
|    | GO:00066 |                                                                      |      | 109/2321 | 0.001320 | 0.053322 | 0.039490 |
| BP | 12       | protein targeting to membrane                                        | 3/46 | 0        | 44       | 58       | 63       |
|    | GO:00086 |                                                                      |      | 111/2321 | 0.001391 | 0.054579 | 0.040421 |
| BP | 37       | apoptotic mitochondrial changes                                      | 3/46 | 0        | 32       | 56       | 55       |
|    | GO:00326 |                                                                      |      |          | 0.001613 | 0.060849 | 0.045064 |
| BP | 92       | negative regulation of interleukin-1 production                      | 2/46 | 30/23210 | 52       | 01       | 7        |
|    | GO:00066 |                                                                      |      | 256/2321 | 0.001639 | 0.060849 | 0.045064 |
| BP | 05       | protein targeting                                                    | 4/46 | 0        | 78       | 01       | 7        |
| BP | GO:19034 | reactive oxygen species biosynthetic process                         | 3/46 | 121/2321 | 0.001781 | 0.064370 | 0.047672 |

|    |          |                                                                         |      |          |          |          |          |
|----|----------|-------------------------------------------------------------------------|------|----------|----------|----------|----------|
|    | 09       |                                                                         |      | 0        | 56       | 62       | 8        |
|    | GO:20011 |                                                                         |      |          | 0.001835 | 0.064606 | 0.047847 |
| BP | 71       | positive regulation of ATP biosynthetic process                         | 2/46 | 32/23210 | 15       | 86       | 76       |
|    | GO:19010 |                                                                         |      |          | 0.001951 | 0.065337 | 0.048389 |
| BP | 99       | negative regulation of signal transduction in absence of ligand         | 2/46 | 33/23210 | 09       | 79       | 09       |
|    | GO:20012 | negative regulation of extrinsic apoptotic signaling pathway in absence |      |          | 0.001951 | 0.065337 | 0.048389 |
| BP | 40       | of ligand                                                               | 2/46 | 33/23210 | 09       | 79       | 09       |
|    | GO:00198 |                                                                         |      |          | 0.002193 | 0.071694 | 0.053097 |
| BP | 35       | cytolysis                                                               | 2/46 | 35/23210 | 14       | 85       | 11       |
|    | GO:00026 |                                                                         |      | 473/2321 | 0.002371 | 0.073472 | 0.054413 |
| BP | 83       | negative regulation of immune system process                            | 5/46 | 0        | 11       | 38       | 55       |
|    | GO:00308 |                                                                         |      |          | 0.002448 | 0.073472 | 0.054413 |
| BP | 10       | positive regulation of nucleotide biosynthetic process                  | 2/46 | 37/23210 | 67       | 38       | 55       |
|    | GO:19003 |                                                                         |      |          | 0.002448 | 0.073472 | 0.054413 |
| BP | 73       | positive regulation of purine nucleotide biosynthetic process           | 2/46 | 37/23210 | 67       | 38       | 55       |
|    | GO:00108 |                                                                         |      | 136/2321 | 0.002484 | 0.073472 | 0.054413 |
| BP | 21       | regulation of mitochondrion organization                                | 3/46 | 0        | 7        | 38       | 55       |
|    | GO:00725 |                                                                         |      | 288/2321 | 0.002515 | 0.073472 | 0.054413 |
| BP | 93       | reactive oxygen species metabolic process                               | 4/46 | 0        | 08       | 38       | 55       |
|    | GO:00450 |                                                                         |      | 141/2321 | 0.002752 | 0.075435 | 0.055867 |
| BP | 17       | glycerolipid biosynthetic process                                       | 3/46 | 0        | 1        | 78       | 65       |
|    | GO:00073 |                                                                         |      | 493/2321 | 0.002834 | 0.075435 | 0.055867 |
| BP | 46       | regulation of mitotic cell cycle                                        | 5/46 | 0        | 77       | 78       | 65       |
|    | GO:00091 |                                                                         |      | 298/2321 | 0.002843 | 0.075435 | 0.055867 |
| BP | 41       | nucleoside triphosphate metabolic process                               | 4/46 | 0        | 88       | 78       | 65       |
| BP | GO:00708 | regulation of calcineurin-NFAT signaling cascade                        | 2/46 | 40/23210 | 0.002857 | 0.075435 | 0.055867 |

|    |          |                                                                          |      |          |          |          |          |
|----|----------|--------------------------------------------------------------------------|------|----------|----------|----------|----------|
|    | 84       |                                                                          |      |          |          | 78       | 65       |
|    | GO:01060 |                                                                          |      |          |          | 0.075435 | 0.055867 |
| BP | 56       | regulation of calcineurin-mediated signaling                             | 2/46 | 40/23210 | 0.002857 | 78       | 65       |
|    | GO:00028 |                                                                          |      |          | 0.002999 | 0.077710 | 0.057552 |
| BP | 32       | negative regulation of response to biotic stimulus                       | 2/46 | 41/23210 | 73       | 11       | 01       |
|    | GO:00105 |                                                                          |      |          | 0.003145 | 0.079983 | 0.059235 |
| BP | 59       | regulation of glycoprotein biosynthetic process                          | 2/46 | 42/23210 | 76       | 86       | 95       |
|    | GO:00507 |                                                                          |      | 149/2321 | 0.003215 | 0.080276 | 0.059452 |
| BP | 28       | negative regulation of inflammatory response                             | 3/46 | 0        | 72       | 03       | 33       |
|    | GO:00434 |                                                                          |      |          | 0.003295 | 0.080787 | 0.059831 |
| BP | 03       | skeletal muscle tissue regeneration                                      | 2/46 | 43/23210 | 06       | 89       | 41       |
|    | GO:00149 |                                                                          |      |          | 0.003447 | 0.083045 | 0.061503 |
| BP | 04       | myotube cell development                                                 | 2/46 | 44/23210 | 63       | 56       | 44       |
|    | GO:00518 |                                                                          |      | 155/2321 | 0.003593 | 0.083336 | 0.061719 |
| BP | 96       | regulation of protein kinase B signaling                                 | 3/46 | 0        | 07       | 72       | 07       |
|    | GO:19035 |                                                                          |      |          | 0.003603 | 0.083336 | 0.061719 |
| BP | 80       | positive regulation of ATP metabolic process                             | 2/46 | 45/23210 | 45       | 72       | 07       |
|    | GO:00901 |                                                                          |      |          | 0.003924 | 0.083336 | 0.061719 |
| BP | 99       | regulation of release of cytochrome c from mitochondria                  | 2/46 | 47/23210 | 79       | 72       | 07       |
|    | GO:19030 |                                                                          |      |          | 0.003924 | 0.083336 | 0.061719 |
| BP | 18       | regulation of glycoprotein metabolic process                             | 2/46 | 47/23210 | 79       | 72       | 07       |
|    | GO:20012 |                                                                          |      |          | 0.003924 | 0.083336 | 0.061719 |
| BP | 39       | regulation of extrinsic apoptotic signaling pathway in absence of ligand | 2/46 | 47/23210 | 79       | 72       | 07       |
|    | GO:00091 |                                                                          |      | 160/2321 | 0.003927 | 0.083336 | 0.061719 |
| BP | 42       | nucleoside triphosphate biosynthetic process                             | 3/46 | 0        | 4        | 72       | 07       |
| BP | GO:20012 | regulation of extrinsic apoptotic signaling pathway                      | 3/46 | 161/2321 | 0.003996 | 0.083336 | 0.061719 |

|    |          |                                                                     |      |          |          |          |          |
|----|----------|---------------------------------------------------------------------|------|----------|----------|----------|----------|
|    | 36       |                                                                     |      | 0        | 46       | 72       | 07       |
|    | GO:00504 |                                                                     |      |          | 0.004090 | 0.083336 | 0.061719 |
| BP | 35       | amyloid-beta metabolic process                                      | 2/46 | 48/23210 | 29       | 72       | 07       |
|    | GO:00508 |                                                                     |      |          | 0.004090 | 0.083336 | 0.061719 |
| BP | 50       | positive regulation of calcium-mediated signaling                   | 2/46 | 48/23210 | 29       | 72       | 07       |
|    | GO:00326 |                                                                     |      | 164/2321 | 0.004208 | 0.083336 | 0.061719 |
| BP | 80       | regulation of tumor necrosis factor production                      | 3/46 | 0        | 09       | 72       | 07       |
|    | GO:00331 |                                                                     |      |          | 0.004258 | 0.083336 | 0.061719 |
| BP | 73       | calcineurin-NFAT signaling cascade                                  | 2/46 | 49/23210 | 98       | 72       | 07       |
|    | GO:00439 |                                                                     |      | 165/2321 | 0.004280 | 0.083336 | 0.061719 |
| BP | 01       | negative regulation of multi-organism process                       | 3/46 | 0        | 12       | 72       | 07       |
|    | GO:19035 |                                                                     |      | 166/2321 | 0.004352 | 0.083336 | 0.061719 |
| BP | 55       | regulation of tumor necrosis factor superfamily cytokine production | 3/46 | 0        | 9        | 72       | 07       |
|    | GO:00326 |                                                                     |      | 167/2321 | 0.004426 | 0.083336 | 0.061719 |
| BP | 40       | tumor necrosis factor production                                    | 3/46 | 0        | 43       | 72       | 07       |
|    | GO:00459 |                                                                     |      |          | 0.004430 | 0.083336 | 0.061719 |
| BP | 81       | positive regulation of nucleotide metabolic process                 | 2/46 | 50/23210 | 87       | 72       | 07       |
|    | GO:19005 |                                                                     |      |          | 0.004430 | 0.083336 | 0.061719 |
| BP | 44       | positive regulation of purine nucleotide metabolic process          | 2/46 | 50/23210 | 87       | 72       | 07       |
|    | GO:00604 |                                                                     |      |          | 0.004605 | 0.085154 | 0.063065 |
| BP | 28       | lung epithelium development                                         | 2/46 | 51/23210 | 93       | 21       | 1        |
|    | GO:00717 |                                                                     |      | 170/2321 | 0.004651 | 0.085154 | 0.063065 |
| BP | 06       | tumor necrosis factor superfamily cytokine production               | 3/46 | 0        | 54       | 21       | 1        |
|    | GO:00977 |                                                                     |      |          | 0.004784 | 0.086429 | 0.064009 |
| BP | 20       | calcineurin-mediated signaling                                      | 2/46 | 52/23210 | 15       | 38       | 49       |
| BP | GO:00066 | phospholipid metabolic process                                      | 4/46 | 348/2321 | 0.004936 | 0.088031 | 0.065195 |

|    |          |                                                        |      |          |          |          |          |
|----|----------|--------------------------------------------------------|------|----------|----------|----------|----------|
|    | 44       |                                                        |      | 0        | 93       | 24       | 83       |
|    | GO:00507 |                                                        |      | 354/2321 | 0.005242 | 0.092282 | 0.068344 |
| BP | 27       | regulation of inflammatory response                    | 4/46 | 0        | 56       | 57       | 36       |
|    | GO:19055 |                                                        |      |          | 0.005528 | 0.096082 | 0.071158 |
| BP | 17       | macrophage migration                                   | 2/46 | 56/23210 | 39       | 09       | 28       |
|    | GO:00427 |                                                        |      |          | 0.005722 | 0.096995 | 0.071834 |
| BP | 75       | mitochondrial ATP synthesis coupled electron transport | 2/46 | 57/23210 | 23       | 42       | 68       |
|    | GO:00480 |                                                        |      |          | 0.005722 | 0.096995 | 0.071834 |
| BP | 16       | inositol phosphate-mediated signaling                  | 2/46 | 57/23210 | 23       | 42       | 68       |
|    | GO:00106 |                                                        |      |          | 0.005919 | 0.098147 | 0.072687 |
| BP | 56       | negative regulation of muscle cell apoptotic process   | 2/46 | 58/23210 | 16       | 3        | 77       |
|    | GO:00434 |                                                        |      | 186/2321 | 0.005968 | 0.098147 | 0.072687 |
| BP | 91       | protein kinase B signaling                             | 3/46 | 0        | 92       | 3        | 77       |
|    | GO:19012 |                                                        |      | 368/2321 | 0.006004 | 0.098147 | 0.072687 |
| BP | 14       | regulation of neuron death                             | 4/46 | 0        | 64       | 3        | 77       |
|    | GO:00485 |                                                        |      |          | 0.000167 | 0.019813 | 0.012902 |
| CC | 00       | signal recognition particle                            | 2/46 | 10/23436 | 91       | 75       | 8        |
|    | GO:00310 |                                                        |      |          | 0.000630 | 0.037224 | 0.024240 |
| CC | 91       | platelet alpha granule                                 | 2/46 | 19/23436 | 93       | 76       | 92       |
|    | GO:00987 |                                                        |      | 263/2343 | 0.001746 | 0.068712 | 0.044745 |
| CC | 98       | mitochondrial protein complex                          | 4/46 | 6        | 93       | 52       | 89       |
|    | GO:00003 |                                                        |      |          | 0.003086 | 0.073300 | 0.047733 |
| CC | 07       | cyclin-dependent protein kinase holoenzyme complex     | 2/46 | 42/23436 | 88       | 8        | 8        |
|    | GO:00057 |                                                        |      |          | 0.004348 | 0.073300 | 0.047733 |
| CC | 47       | mitochondrial respiratory chain complex I              | 2/46 | 50/23436 | 35       | 8        | 8        |
| CC | GO:00309 | NADH dehydrogenase complex                             | 2/46 | 50/23436 | 0.004348 | 0.073300 | 0.047733 |

|      |          |                                         |      |          |          |          |          |
|------|----------|-----------------------------------------|------|----------|----------|----------|----------|
|      | 64       |                                         |      |          | 35       | 8        | 8        |
|      | GO:00452 |                                         |      |          | 0.004348 | 0.073300 | 0.047733 |
| CC   | 71       | respiratory chain complex I             | 2/46 | 50/23436 | 35       | 8        | 8        |
|      | GO:00003 |                                         |      |          | 0.006205 | 0.078733 | 0.051271 |
| CC   | 15       | organellar large ribosomal subunit      | 2/46 | 60/23436 | 24       | 38       | 51       |
|      | GO:00057 |                                         |      |          | 0.006205 | 0.078733 | 0.051271 |
| CC   | 62       | mitochondrial large ribosomal subunit   | 2/46 | 60/23436 | 24       | 38       | 51       |
|      | GO:00301 |                                         |      | 383/2343 | 0.006672 | 0.078733 | 0.051271 |
| CC   | 41       | secretory granule                       | 4/46 | 6        | 32       | 38       | 51       |
|      | GO:00444 |                                         |      | 216/2343 | 0.008757 | 0.093949 | 0.061180 |
| CC   | 55       | mitochondrial membrane part             | 3/46 | 6        | 99       | 37       | 23       |
|      | GO:00057 |                                         |      |          | 0.010043 | 0.095487 | 0.062181 |
| CC   | 46       | mitochondrial respiratory chain         | 2/46 | 77/23436 | 6        | 1        | 61       |
|      | GO:00988 |                                         |      |          | 0.011066 | 0.095487 | 0.062181 |
| CC   | 03       | respiratory chain complex               | 2/46 | 81/23436 | 37       | 1        | 61       |
|      | GO:19025 |                                         |      |          | 0.011328 | 0.095487 | 0.062181 |
| CC   | 54       | serine/threonine protein kinase complex | 2/46 | 82/23436 | 98       | 1        | 61       |
|      | GO:00704 |                                         |      |          | 0.013243 | 0.097897 | 0.063751 |
| CC   | 69       | respiratory chain                       | 2/46 | 89/23436 | 32       | 82       | 48       |
|      | GO:00003 |                                         |      |          | 0.014103 | 0.097897 | 0.063751 |
| CC   | 13       | organellar ribosome                     | 2/46 | 92/23436 | 92       | 82       | 48       |
|      | GO:00057 |                                         |      |          | 0.014103 | 0.097897 | 0.063751 |
| CC   | 61       | mitochondrial ribosome                  | 2/46 | 92/23436 | 92       | 82       | 48       |
|      | GO:00057 |                                         |      | 264/2343 | 0.015020 | 0.098465 | 0.064121 |
| CC   | 59       | mitochondrial matrix                    | 3/46 | 6        | 22       | 87       | 4        |
| KEGG | mmu0411  | p53 signaling pathway                   | 4/23 | 72/8910  | 3.0905E- | 0.003832 | 0.003090 |



|      |         |                      |      |          |    |          |          |          |
|------|---------|----------------------|------|----------|----|----------|----------|----------|
|      | 5       |                      |      |          |    | 05       | 2        | 48       |
|      | mmu0522 |                      |      |          |    | 0.000493 | 0.026794 | 0.021608 |
| KEGG | 4       | Breast cancer        | 4/23 | 147/8910 | 33 | 96       | 84       |          |
|      | mmu0521 |                      |      |          |    | 0.000797 | 0.026794 | 0.021608 |
| KEGG | 8       | Melanoma             | 3/23 | 72/8910  | 91 | 96       | 84       |          |
|      | mmu0521 |                      |      |          |    | 0.000864 | 0.026794 | 0.021608 |
| KEGG | 4       | Glioma               | 3/23 | 74/8910  | 35 | 96       | 84       |          |
|      | mmu0152 |                      |      |          |    | 0.001675 | 0.041561 | 0.033517 |
| KEGG | 2       | Endocrine resistance | 3/23 | 93/8910  | 86 | 28       | 16       |          |
|      | mmu0306 |                      |      |          |    | 0.002480 | 0.051265 | 0.041343 |
| KEGG | 0       | Protein export       | 2/23 | 29/8910  | 58 | 4        | 06       |          |

Table S6. GO analysis of DEGs in VO and TAC groups with opposite regulation.

| ONTOLO |         |                                       | GeneRat |         |          |          |          |
|--------|---------|---------------------------------------|---------|---------|----------|----------|----------|
| GY     | ID      | Description                           | io      | BgRatio | pvalue   | p.adjust | qvalue   |
|        | GO:0016 |                                       |         | 213/232 | 2.1827E- | 3.3243E- | 2.5963E- |
| BP     | 054     | organic acid catabolic process        | 27/245  | 10      | 21       | 18       | 18       |
|        | GO:0046 |                                       |         | 213/232 | 2.1827E- | 3.3243E- | 2.5963E- |
| BP     | 395     | carboxylic acid catabolic process     | 27/245  | 10      | 21       | 18       | 18       |
|        | GO:0072 |                                       |         | 112/232 | 1.5989E- | 1.6235E- | 1.2679E- |
| BP     | 329     | monocarboxylic acid catabolic process | 21/245  | 10      | 20       | 17       | 17       |
|        | GO:0006 |                                       |         | 376/232 | 7.8118E- | 5.9487E- | 4.646E-1 |
| BP     | 631     | fatty acid metabolic process          | 32/245  | 10      | 20       | 17       | 7        |
|        | GO:0009 |                                       |         | 93/2321 | 1.986E-1 | 1.2099E- | 9.4492E- |
| BP     | 062     | fatty acid catabolic process          | 19/245  | 0       | 9        | 16       | 17       |
| BP     | GO:0044 | small molecule catabolic process      | 29/245  | 311/232 | 3.8449E- | 1.9519E- | 1.5245E- |

|    |         |                                                        |        |         |          |          |          |
|----|---------|--------------------------------------------------------|--------|---------|----------|----------|----------|
|    | 282     |                                                        |        | 10      | 19       | 16       | 16       |
|    | GO:0019 |                                                        |        | 98/2321 | 5.712E-1 | 2.4855E- | 1.9412E- |
| BP | 395     | fatty acid oxidation                                   | 19/245 | 0       | 9        | 16       | 16       |
|    | GO:0034 |                                                        |        | 100/232 | 8.5656E- | 3.2614E- | 2.5471E- |
| BP | 440     | lipid oxidation                                        | 19/245 | 10      | 19       | 16       | 16       |
|    | GO:0006 |                                                        |        | 67/2321 | 1.0107E- | 3.4206E- | 2.6715E- |
| BP | 635     | fatty acid beta-oxidation                              | 16/245 | 0       | 17       | 15       | 15       |
|    | GO:0044 |                                                        |        | 199/232 | 2.4431E- | 7.4418E- | 5.8121E- |
| BP | 242     | cellular lipid catabolic process                       | 22/245 | 10      | 16       | 14       | 14       |
|    | GO:0030 |                                                        |        | 218/232 | 1.9368E- | 5.3633E- | 4.1888E- |
| BP | 258     | lipid modification                                     | 21/245 | 10      | 14       | 12       | 12       |
|    | GO:0033 |                                                        |        | 11/2321 | 2.2075E- | 5.6034E- | 4.3763E- |
| BP | 539     | fatty acid beta-oxidation using acyl-CoA dehydrogenase | 8/245  | 0       | 14       | 12       | 12       |
|    | GO:0006 |                                                        |        | 447/232 |          | 1.0591E- | 8.2714E- |
| BP | 163     | purine nucleotide metabolic process                    | 28/245 | 10      | 4.52E-14 | 11       | 12       |
|    | GO:0009 |                                                        |        | 423/232 | 8.4215E- | 1.8323E- | 1.431E-1 |
| BP | 150     | purine ribonucleotide metabolic process                | 27/245 | 10      | 14       | 11       | 1        |
|    | GO:0009 |                                                        |        | 433/232 | 1.4725E- | 2.9901E- | 2.3353E- |
| BP | 259     | ribonucleotide metabolic process                       | 27/245 | 10      | 13       | 11       | 11       |
|    | GO:0016 |                                                        |        | 306/232 | 2.169E-1 | 4.1293E- | 3.225E-1 |
| BP | 042     | lipid catabolic process                                | 23/245 | 10      | 3        | 11       | 1        |
|    | GO:0019 |                                                        |        | 450/232 | 3.6764E- | 6.5872E- | 5.1446E- |
| BP | 693     | ribose phosphate metabolic process                     | 27/245 | 10      | 13       | 11       | 11       |
|    | GO:0072 |                                                        |        | 490/232 | 4.3035E- | 7.2824E- | 5.6876E- |
| BP | 521     | purine-containing compound metabolic process           | 28/245 | 10      | 13       | 11       | 11       |
| BP | GO:0033 | nucleoside bisphosphate metabolic process              | 14/245 | 99/2321 | 2.5196E- | 3.6547E- | 2.8543E- |

|    |         |                                                  |        |         |          |          |          |
|----|---------|--------------------------------------------------|--------|---------|----------|----------|----------|
|    | 865     |                                                  |        | 0       | 12       | 10       | 10       |
|    | GO:0033 |                                                  |        | 99/2321 | 2.5196E- | 3.6547E- | 2.8543E- |
| BP | 875     | ribonucleoside bisphosphate metabolic process    | 14/245 | 0       | 12       | 10       | 10       |
|    | GO:0034 |                                                  |        | 99/2321 | 2.5196E- | 3.6547E- | 2.8543E- |
| BP | 032     | purine nucleoside bisphosphate metabolic process | 14/245 | 0       | 12       | 10       | 10       |
|    | GO:0006 |                                                  |        | 82/2321 | 3.4363E- | 4.5509E- | 3.5543E- |
| BP | 637     | acyl-CoA metabolic process                       | 13/245 | 0       | 12       | 10       | 10       |
|    | GO:0035 |                                                  |        | 82/2321 | 3.4363E- | 4.5509E- | 3.5543E- |
| BP | 383     | thioester metabolic process                      | 13/245 | 0       | 12       | 10       | 10       |
|    | GO:0006 |                                                  |        | 331/232 | 8.5163E- | 1.0809E- | 8.4416E- |
| BP | 732     | coenzyme metabolic process                       | 22/245 | 10      | 12       | 09       | 10       |
|    | GO:0006 |                                                  |        | 379/232 | 1.7838E- | 2.1734E- | 1.6975E- |
| BP | 091     | generation of precursor metabolites and energy   | 23/245 | 10      | 11       | 09       | 09       |
|    | GO:0006 |                                                  |        | 240/232 | 1.0044E- | 1.1767E- | 9.1904E- |
| BP | 164     | purine nucleotide biosynthetic process           | 18/245 | 10      | 10       | 08       | 09       |
|    | GO:0072 |                                                  |        | 245/232 | 1.4085E- | 1.589E-0 | 1.241E-0 |
| BP | 522     | purine-containing compound biosynthetic process  | 18/245 | 10      | 10       | 8        | 8        |
|    | GO:0009 |                                                  |        | 223/232 | 2.6202E- | 2.8504E- | 2.2262E- |
| BP | 152     | purine ribonucleotide biosynthetic process       | 17/245 | 10      | 10       | 08       | 08       |
|    | GO:0009 |                                                  |        | 232/232 | 4.8387E- | 5.0823E- | 3.9693E- |
| BP | 260     | ribonucleotide biosynthetic process              | 17/245 | 10      | 10       | 08       | 08       |
|    | GO:0046 |                                                  |        | 239/232 | 7.6492E- | 7.7665E- | 6.0657E- |
| BP | 390     | ribose phosphate biosynthetic process            | 17/245 | 10      | 10       | 08       | 08       |
|    | GO:0044 |                                                  |        | 284/232 | 1.5284E- | 1.4935E- | 1.1664E- |
| BP | 262     | cellular carbohydrate metabolic process          | 18/245 | 10      | 09       | 07       | 07       |
| BP | GO:0009 | nucleotide biosynthetic process                  | 18/245 | 285/232 | 1.6163E- | 1.4935E- | 1.1664E- |

|    |         |                                                     |        |         |          |          |          |
|----|---------|-----------------------------------------------------|--------|---------|----------|----------|----------|
|    | 165     |                                                     |        | 10      | 09       | 07       | 07       |
|    | GO:0051 |                                                     |        | 251/232 | 1.618E-0 | 1.4935E- | 1.1664E- |
| BP | 188     | cofactor biosynthetic process                       | 17/245 | 10      | 9        | 07       | 07       |
|    | GO:0015 |                                                     |        | 254/232 | 1.9383E- | 1.7365E- | 1.3562E- |
| BP | 980     | energy derivation by oxidation of organic compounds | 17/245 | 10      | 09       | 07       | 07       |
|    | GO:1901 |                                                     |        | 291/232 | 2.2493E- | 1.9269E- | 1.5049E- |
| BP | 293     | nucleoside phosphate biosynthetic process           | 18/245 | 10      | 09       | 07       | 07       |
|    | GO:0009 |                                                     |        | 194/232 | 2.4985E- | 1.9269E- | 1.5049E- |
| BP | 108     | coenzyme biosynthetic process                       | 15/245 | 10      | 09       | 07       | 07       |
|    | GO:0033 |                                                     |        | 35/2321 | 2.5304E- | 1.9269E- | 1.5049E- |
| BP | 866     | nucleoside bisphosphate biosynthetic process        | 8/245  | 0       | 09       | 07       | 07       |
|    | GO:0034 |                                                     |        | 35/2321 | 2.5304E- | 1.9269E- | 1.5049E- |
| BP | 030     | ribonucleoside bisphosphate biosynthetic process    | 8/245  | 0       | 09       | 07       | 07       |
|    | GO:0034 |                                                     |        | 35/2321 | 2.5304E- | 1.9269E- | 1.5049E- |
| BP | 033     | purine nucleoside bisphosphate biosynthetic process | 8/245  | 0       | 09       | 07       | 07       |
|    | GO:0046 |                                                     |        | 35/2321 | 2.5304E- | 1.9269E- | 1.5049E- |
| BP | 320     | regulation of fatty acid oxidation                  | 8/245  | 0       | 09       | 07       | 07       |
|    | GO:0006 |                                                     |        | 272/232 | 5.4442E- | 3.8814E- | 3.0314E- |
| BP | 790     | sulfur compound metabolic process                   | 17/245 | 10      | 09       | 07       | 07       |
|    | GO:0035 |                                                     |        | 25/2321 | 5.4794E- | 3.8814E- | 3.0314E- |
| BP | 384     | thioester biosynthetic process                      | 7/245  | 0       | 09       | 07       | 07       |
|    | GO:0071 |                                                     |        | 25/2321 | 5.4794E- | 3.8814E- | 3.0314E- |
| BP | 616     | acyl-CoA biosynthetic process                       | 7/245  | 0       | 09       | 07       | 07       |
|    | GO:0003 |                                                     |        | 392/232 | 7.7288E- | 5.3505E- | 4.1788E- |
| BP | 012     | muscle system process                               | 20/245 | 10      | 09       | 07       | 07       |
| BP | GO:0006 | acetyl-CoA metabolic process                        | 7/245  | 33/2321 | 4.5315E- | 3.0673E- | 2.3956E- |

|    |         |                                                |        |         |          |          |          |
|----|---------|------------------------------------------------|--------|---------|----------|----------|----------|
|    | 084     |                                                |        | 0       | 08       | 06       | 06       |
|    | GO:0008 |                                                |        | 177/232 | 5.4394E- | 3.6018E- | 2.8131E- |
| BP | 016     | regulation of heart contraction                | 13/245 | 10      | 08       | 06       | 06       |
|    | GO:0062 |                                                |        | 359/232 | 5.7884E- | 3.7514E- | 2.9298E- |
| BP | 012     | regulation of small molecule metabolic process | 18/245 | 10      | 08       | 06       | 06       |
|    | GO:0005 |                                                |        | 253/232 | 8.8216E- | 5.5981E- | 4.3721E- |
| BP | 996     | monosaccharide metabolic process               | 15/245 | 10      | 08       | 06       | 06       |
|    | GO:0086 |                                                |        | 54/2321 | 9.411E-0 | 5.8502E- | 4.569E-0 |
| BP | 001     | cardiac muscle cell action potential           | 8/245  | 0       | 8        | 06       | 6        |
|    | GO:0006 |                                                |        | 186/232 | 9.7474E- | 5.9381E- | 4.6377E- |
| BP | 109     | regulation of carbohydrate metabolic process   | 13/245 | 10      | 08       | 06       | 06       |
|    | GO:0019 |                                                |        | 223/232 | 1.1858E- | 7.0825E- | 5.5314E- |
| BP | 318     | hexose metabolic process                       | 14/245 | 10      | 07       | 06       | 06       |
|    | GO:0005 |                                                |        | 78/2321 | 1.3596E- | 7.6691E- | 5.9896E- |
| BP | 977     | glycogen metabolic process                     | 9/245  | 0       | 07       | 06       | 06       |
|    | GO:0006 |                                                |        | 78/2321 | 1.3596E- | 7.6691E- | 5.9896E- |
| BP | 073     | cellular glucan metabolic process              | 9/245  | 0       | 07       | 06       | 06       |
|    | GO:0044 |                                                |        | 78/2321 | 1.3596E- | 7.6691E- | 5.9896E- |
| BP | 042     | glucan metabolic process                       | 9/245  | 0       | 07       | 06       | 06       |
|    | GO:0046 |                                                |        | 13/2321 | 1.5112E- | 8.3695E- | 6.5366E- |
| BP | 322     | negative regulation of fatty acid oxidation    | 5/245  | 0       | 07       | 06       | 06       |
|    | GO:0044 |                                                |        | 104/232 | 1.5655E- | 8.5117E- | 6.6477E- |
| BP | 264     | cellular polysaccharide metabolic process      | 10/245 | 10      | 07       | 06       | 06       |
|    | GO:0006 |                                                |        | 194/232 | 1.5928E- | 8.5117E- | 6.6477E- |
| BP | 006     | glucose metabolic process                      | 13/245 | 10      | 07       | 06       | 06       |
| BP | GO:0086 | cardiac muscle cell contraction                | 8/245  | 62/2321 | 2.8438E- | 1.4935E- | 1.1664E- |

|    |         |                                            |        |         |          |          |          |
|----|---------|--------------------------------------------|--------|---------|----------|----------|----------|
|    | 003     |                                            |        | 0       | 07       | 05       | 05       |
|    | GO:0016 |                                            |        | 142/232 | 3.4241E- | 1.7678E- | 1.3806E- |
| BP | 052     | carbohydrate catabolic process             | 11/245 | 10      | 07       | 05       | 05       |
|    | GO:0006 |                                            |        | 88/2321 | 3.8869E- | 1.9409E- | 1.5159E- |
| BP | 112     | energy reserve metabolic process           | 9/245  | 0       | 07       | 05       | 05       |
|    | GO:0019 |                                            |        | 88/2321 | 3.8869E- | 1.9409E- | 1.5159E- |
| BP | 217     | regulation of fatty acid metabolic process | 9/245  | 0       | 07       | 05       | 05       |
|    | GO:0005 |                                            |        | 115/232 | 4.0401E- | 1.9849E- | 1.5502E- |
| BP | 976     | polysaccharide metabolic process           | 10/245 | 10      | 07       | 05       | 05       |
|    | GO:0060 |                                            |        | 211/232 | 4.1917E- | 2.0266E- | 1.5828E- |
| BP | 047     | heart contraction                          | 13/245 | 10      | 07       | 05       | 05       |
|    | GO:0009 |                                            |        | 90/2321 | 4.7175E- | 2.2452E- | 1.7536E- |
| BP | 063     | cellular amino acid catabolic process      | 9/245  | 0       | 07       | 05       | 05       |
|    | GO:0002 |                                            |        | 93/2321 | 6.2507E- | 2.9292E- | 2.2877E- |
| BP | 027     | regulation of heart rate                   | 9/245  | 0       | 07       | 05       | 05       |
|    | GO:0003 |                                            |        | 221/232 | 7.0953E- | 3.2746E- | 2.5575E- |
| BP | 015     | heart process                              | 13/245 | 10      | 07       | 05       | 05       |
|    | GO:0006 |                                            |        | 261/232 | 8.0112E- | 3.6421E- | 2.8445E- |
| BP | 520     | cellular amino acid metabolic process      | 14/245 | 10      | 07       | 05       | 05       |
|    | GO:0060 |                                            |        | 124/232 | 8.141E-0 | 3.6467E- | 2.8481E- |
| BP | 048     | cardiac muscle contraction                 | 10/245 | 10      | 7        | 05       | 05       |
|    | GO:0005 |                                            |        | 18/2321 | 9.6356E- | 4.1338E- | 3.2285E- |
| BP | 980     | glycogen catabolic process                 | 5/245  | 0       | 07       | 05       | 05       |
|    | GO:0006 |                                            |        | 18/2321 | 9.6356E- | 4.1338E- | 3.2285E- |
| BP | 085     | acetyl-CoA biosynthetic process            | 5/245  | 0       | 07       | 05       | 05       |
| BP | GO:0009 | glucan catabolic process                   | 5/245  | 18/2321 | 9.6356E- | 4.1338E- | 3.2285E- |

|    |         |                                                            |        |         |          |          |          |
|----|---------|------------------------------------------------------------|--------|---------|----------|----------|----------|
|    | 251     |                                                            |        | 0       | 07       | 05       | 05       |
|    | GO:0008 |                                                            |        | 484/232 | 1.0609E- | 4.4881E- | 3.5053E- |
| BP | 015     | blood circulation                                          | 19/245 | 10      | 06       | 05       | 05       |
|    | GO:0034 |                                                            |        | 233/232 | 1.286E-0 | 5.3658E- | 4.1907E- |
| BP | 764     | positive regulation of transmembrane transport             | 13/245 | 10      | 6        | 05       | 05       |
|    | GO:1904 |                                                            |        | 163/232 | 1.3547E- | 5.5762E- | 4.355E-0 |
| BP | 064     | positive regulation of cation transmembrane transport      | 11/245 | 10      | 06       | 05       | 5        |
|    | GO:0003 |                                                            |        | 495/232 | 1.4789E- | 5.9655E- | 4.6591E- |
| BP | 013     | circulatory system process                                 | 19/245 | 10      | 06       | 05       | 05       |
|    | GO:0051 |                                                            |        | 103/232 | 1.4884E- | 5.9655E- | 4.6591E- |
| BP | 289     | protein homotetramerization                                | 9/245  | 10      | 06       | 05       | 05       |
|    | GO:0046 |                                                            |        | 362/232 | 1.6969E- | 6.3659E- | 4.9718E- |
| BP | 394     | carboxylic acid biosynthetic process                       | 16/245 | 10      | 06       | 05       | 05       |
|    | GO:0034 |                                                            |        | 78/2321 | 1.7056E- | 6.3659E- | 4.9718E- |
| BP | 637     | cellular carbohydrate biosynthetic process                 | 8/245  | 0       | 06       | 05       | 05       |
|    | GO:0090 |                                                            |        | 239/232 | 1.7074E- | 6.3659E- | 4.9718E- |
| BP | 257     | regulation of muscle system process                        | 13/245 | 10      | 06       | 05       | 05       |
|    | GO:1903 |                                                            |        | 239/232 | 1.7074E- | 6.3659E- | 4.9718E- |
| BP | 522     | regulation of blood circulation                            | 13/245 | 10      | 06       | 05       | 05       |
|    | GO:0044 |                                                            |        | 20/2321 | 1.7137E- | 6.3659E- | 4.9718E- |
| BP | 247     | cellular polysaccharide catabolic process                  | 5/245  | 0       | 06       | 05       | 05       |
|    | GO:0051 |                                                            |        | 20/2321 | 1.7137E- | 6.3659E- | 4.9718E- |
| BP | 481     | negative regulation of cytosolic calcium ion concentration | 5/245  | 0       | 06       | 05       | 05       |
|    | GO:0016 |                                                            |        | 363/232 | 1.7586E- | 6.4063E- | 5.0034E- |
| BP | 053     | organic acid biosynthetic process                          | 16/245 | 10      | 06       | 05       | 05       |
| BP | GO:0043 | regulation of carbohydrate catabolic process               | 7/245  | 55/2321 | 1.7667E- | 6.4063E- | 5.0034E- |

|    |         |                                                     |        |         |          |          |          |
|----|---------|-----------------------------------------------------|--------|---------|----------|----------|----------|
|    | 470     |                                                     |        | 0       | 06       | 05       | 05       |
|    | GO:0044 |                                                     |        | 79/2321 | 1.8806E- | 6.7393E- | 5.2634E- |
| BP | 272     | sulfur compound biosynthetic process                | 8/245  | 0       | 06       | 05       | 05       |
|    | GO:0030 |                                                     |        | 108/232 | 2.2161E- | 7.849E-0 | 6.1301E- |
| BP | 048     | actin filament-based movement                       | 9/245  | 10      | 06       | 5        | 05       |
|    | GO:0086 |                                                     |        | 37/2321 | 2.2999E- | 8.0522E- | 6.2888E- |
| BP | 065     | cell communication involved in cardiac conduction   | 6/245  | 0       | 06       | 05       | 05       |
|    | GO:0061 |                                                     |        | 58/2321 | 2.5482E- | 8.8202E- | 6.8886E- |
| BP | 337     | cardiac conduction                                  | 7/245  | 0       | 06       | 05       | 05       |
|    | GO:0034 |                                                     |        | 179/232 | 3.3777E- | 0.000115 | 9.0284E- |
| BP | 767     | positive regulation of ion transmembrane transport  | 11/245 | 10      | 06       | 6        | 05       |
|    | GO:0019 |                                                     |        | 338/232 | 3.4269E- | 0.000115 | 9.0583E- |
| BP | 216     | regulation of lipid metabolic process               | 15/245 | 10      | 06       | 98       | 05       |
|    | GO:0043 |                                                     |        | 86/2321 | 3.5897E- |          | 9.372E-0 |
| BP | 648     | dicarboxylic acid metabolic process                 | 8/245  | 0       | 06       | 0.00012  | 5        |
|    | GO:0000 |                                                     |        | 23/2321 | 3.6244E- |          | 9.372E-0 |
| BP | 272     | polysaccharide catabolic process                    | 5/245  | 0       | 06       | 0.00012  | 5        |
|    | GO:0086 |                                                     |        | 11/2321 | 3.7719E- | 0.000122 | 9.546E-0 |
| BP | 016     | AV node cell action potential                       | 4/245  | 0       | 06       | 23       | 5        |
|    | GO:0086 |                                                     |        | 11/2321 | 3.7719E- | 0.000122 | 9.546E-0 |
| BP | 027     | AV node cell to bundle of His cell signaling        | 4/245  | 0       | 06       | 23       | 5        |
|    | GO:0070 |                                                     |        | 87/2321 | 3.9176E- | 0.000125 | 9.8102E- |
| BP | 252     | actin-mediated cell contraction                     | 8/245  | 0       | 06       | 61       | 05       |
|    | GO:0045 |                                                     |        | 24/2321 | 4.5389E- | 0.000144 | 0.000112 |
| BP | 922     | negative regulation of fatty acid metabolic process | 5/245  | 0       | 06       | 01       | 48       |
| BP | GO:0072 | monocarboxylic acid biosynthetic process            | 13/245 | 264/232 | 5.093E-0 | 0.000159 | 0.000124 |



|    |         |                                                              |        |         |          |          |          |
|----|---------|--------------------------------------------------------------|--------|---------|----------|----------|----------|
|    | 330     |                                                              |        | 10      | 6        | 93       | 91       |
|    | GO:0010 |                                                              |        | 152/232 | 5.1703E- | 0.000160 | 0.000125 |
| BP | 675     | regulation of cellular carbohydrate metabolic process        | 10/245 | 10      | 06       | 7        | 51       |
|    | GO:0009 |                                                              |        | 12/2321 | 5.611E-0 | 0.000167 | 0.000130 |
| BP | 437     | carnitine metabolic process                                  | 4/245  | 0       | 6        | 54       | 85       |
|    | GO:0086 |                                                              |        | 25/2321 | 5.6249E- | 0.000167 | 0.000130 |
| BP | 019     | cell-cell signaling involved in cardiac conduction           | 5/245  | 0       | 06       | 54       | 85       |
|    | GO:0010 |                                                              |        | 121/232 | 5.6836E- | 0.000167 | 0.000130 |
| BP | 906     | regulation of glucose metabolic process                      | 9/245  | 10      | 06       | 54       | 85       |
|    | GO:0005 |                                                              |        | 43/2321 | 5.7202E- | 0.000167 | 0.000130 |
| BP | 978     | glycogen biosynthetic process                                | 6/245  | 0       | 06       | 54       | 85       |
|    | GO:0009 |                                                              |        | 43/2321 | 5.7202E- | 0.000167 | 0.000130 |
| BP | 250     | glucan biosynthetic process                                  | 6/245  | 0       | 06       | 54       | 85       |
|    | GO:0086 |                                                              |        | 43/2321 | 5.7202E- | 0.000167 | 0.000130 |
| BP | 002     | cardiac muscle cell action potential involved in contraction | 6/245  | 0       | 06       | 54       | 85       |
|    | GO:0033 |                                                              |        | 67/2321 | 6.7992E- | 0.000197 | 0.000154 |
| BP | 692     | cellular polysaccharide biosynthetic process                 | 7/245  | 0       | 06       | 24       | 05       |
|    | GO:0006 |                                                              |        | 158/232 | 7.2912E- | 0.000207 | 0.000162 |
| BP | 941     | striated muscle contraction                                  | 10/245 | 10      | 06       | 96       | 42       |
|    | GO:0016 |                                                              |        | 194/232 | 7.3051E- | 0.000207 | 0.000162 |
| BP | 051     | carbohydrate biosynthetic process                            | 11/245 | 10      | 06       | 96       | 42       |
|    | GO:0086 |                                                              |        | 13/2321 | 8.0376E- | 0.000226 | 0.000177 |
| BP | 067     | AV node cell to bundle of His cell communication             | 4/245  | 0       | 06       | 69       | 05       |
|    | GO:0010 |                                                              |        | 127/232 | 8.4411E- | 0.000233 | 0.000182 |
| BP | 565     | regulation of cellular ketone metabolic process              | 9/245  | 10      | 06       | 74       | 55       |
| BP | GO:0043 | regulation of generation of precursor metabolites and energy | 9/245  | 127/232 | 8.4411E- | 0.000233 | 0.000182 |

|    |         |                                             |        |         |          |          |          |
|----|---------|---------------------------------------------|--------|---------|----------|----------|----------|
|    | 467     |                                             |        | 10      | 06       | 74       | 55       |
|    | GO:0043 |                                             |        | 322/232 | 9.1958E- | 0.000252 | 0.000197 |
| BP | 270     | positive regulation of ion transport        | 14/245 | 10      | 06       | 35       | 08       |
|    | GO:0006 |                                             |        | 14/2321 | 1.1159E- | 0.000300 | 0.000234 |
| BP | 577     | amino-acid betaine metabolic process        | 4/245  | 0       | 05       | 81       | 94       |
|    | GO:0046 |                                             |        | 14/2321 | 1.1159E- | 0.000300 | 0.000234 |
| BP | 459     | short-chain fatty acid metabolic process    | 4/245  | 0       | 05       | 81       | 94       |
|    | GO:0003 |                                             |        | 101/232 | 1.1936E- | 0.000318 | 0.000249 |
| BP | 300     | cardiac muscle hypertrophy                  | 8/245  | 10      | 05       | 92       | 08       |
|    | GO:0006 |                                             |        | 134/232 | 1.3034E- | 0.000345 | 0.000269 |
| BP | 633     | fatty acid biosynthetic process             | 9/245  | 10      | 05       | 24       | 64       |
|    | GO:0050 |                                             |        | 169/232 | 1.317E-0 | 0.000345 | 0.000270 |
| BP | 821     | protein stabilization                       | 10/245 | 10      | 5        | 84       | 1        |
|    | GO:0006 |                                             |        | 289/232 | 1.344E-0 | 0.000349 | 0.000273 |
| BP | 936     | muscle contraction                          | 13/245 | 10      | 5        | 89       | 27       |
|    | GO:0034 |                                             |        | 478/232 | 1.4424E- | 0.000369 | 0.000288 |
| BP | 765     | regulation of ion transmembrane transport   | 17/245 | 10      | 05       | 76       | 79       |
|    | GO:0000 |                                             |        | 75/2321 | 1.4446E- | 0.000369 | 0.000288 |
| BP | 271     | polysaccharide biosynthetic process         | 7/245  | 0       | 05       | 76       | 79       |
|    | GO:0009 |                                             |        | 15/2321 | 1.5091E- | 0.000383 | 0.000299 |
| BP | 083     | branched-chain amino acid catabolic process | 4/245  | 0       | 05       | 07       | 18       |
|    | GO:1901 |                                             |        | 76/2321 | 1.577E-0 | 0.000396 | 0.000309 |
| BP | 606     | alpha-amino acid catabolic process          | 7/245  | 0       | 5        | 53       | 69       |
|    | GO:0014 |                                             |        | 105/232 | 1.5882E- | 0.000396 | 0.000309 |
| BP | 897     | striated muscle hypertrophy                 | 8/245  | 10      | 05       | 53       | 69       |
| BP | GO:0048 | multicellular organismal homeostasis        | 17/245 | 486/232 | 1.7834E- | 0.000441 | 0.000344 |

|    |         |                                                               |        |         |          |          |          |
|----|---------|---------------------------------------------------------------|--------|---------|----------|----------|----------|
|    | 871     |                                                               |        | 10      | 05       | 65       | 93       |
|    | GO:0014 |                                                               |        | 107/232 | 1.8234E- | 0.000447 | 0.000349 |
| BP | 896     | muscle hypertrophy                                            | 8/245  | 10      | 05       | 9        | 81       |
|    | GO:0009 |                                                               |        | 16/2321 | 1.9955E- | 0.000486 | 0.000379 |
| BP | 081     | branched-chain amino acid metabolic process                   | 4/245  | 0       | 05       | 27       | 78       |
|    | GO:0042 |                                                               |        | 395/232 | 2.1843E- | 0.000528 | 0.000412 |
| BP | 692     | muscle cell differentiation                                   | 15/245 | 10      | 05       | 04       | 41       |
|    | GO:1904 |                                                               |        | 80/2321 | 2.2109E- | 0.000530 | 0.000414 |
| BP | 427     | positive regulation of calcium ion transmembrane transport    | 7/245  | 0       | 05       | 27       | 15       |
|    | GO:1904 |                                                               |        | 349/232 | 2.2584E- | 0.000537 | 0.000419 |
| BP | 062     | regulation of cation transmembrane transport                  | 14/245 | 10      | 05       | 44       | 74       |
|    | GO:0086 |                                                               |        | 33/2321 | 2.3454E- | 0.000553 | 0.000432 |
| BP | 091     | regulation of heart rate by cardiac conduction                | 5/245  | 0       | 05       | 8        | 52       |
|    | GO:0051 |                                                               |        | 183/232 | 2.6219E- | 0.000614 | 0.000479 |
| BP | 262     | protein tetramerization                                       | 10/245 | 10      | 05       | 34       | 81       |
|    | GO:0051 |                                                               |        | 56/2321 | 2.7168E- | 0.000629 | 0.000491 |
| BP | 196     | regulation of coenzyme metabolic process                      | 6/245  | 0       | 05       | 1        | 33       |
|    | GO:0044 |                                                               |        | 34/2321 | 2.7262E- | 0.000629 | 0.000491 |
| BP | 275     | cellular carbohydrate catabolic process                       | 5/245  | 0       | 05       | 1        | 33       |
|    | GO:0032 |                                                               |        | 114/232 | 2.8898E- | 0.000661 | 0.000516 |
| BP | 414     | positive regulation of ion transmembrane transporter activity | 8/245  | 10      | 05       | 83       | 9        |
|    | GO:0015 |                                                               |        | 455/232 | 2.9625E- | 0.000673 | 0.000525 |
| BP | 672     | monovalent inorganic cation transport                         | 16/245 | 10      | 05       | 42       | 94       |
|    | GO:0045 |                                                               |        | 84/2321 | 3.0416E- | 0.000686 | 0.000535 |
| BP | 913     | positive regulation of carbohydrate metabolic process         | 7/245  | 0       | 05       | 28       | 99       |
| BP | GO:0009 | purine ribonucleoside triphosphate metabolic process          | 12/245 | 272/232 | 3.4929E- | 0.000782 | 0.000610 |

|    |         |                                                                       |        |         |          |          |          |
|----|---------|-----------------------------------------------------------------------|--------|---------|----------|----------|----------|
|    | 205     |                                                                       |        | 10      | 05       | 31       | 99       |
|    | GO:0006 |                                                                       |        | 118/232 | 3.7048E- | 0.000823 | 0.000643 |
| BP | 090     | pyruvate metabolic process                                            | 8/245  | 10      | 05       | 72       | 33       |
|    | GO:0071 |                                                                       |        | 191/232 | 3.7776E- | 0.000827 | 0.000646 |
| BP | 804     | cellular potassium ion transport                                      | 10/245 | 10      | 05       | 81       | 52       |
|    | GO:0071 |                                                                       |        | 191/232 | 3.7776E- | 0.000827 | 0.000646 |
| BP | 805     | potassium ion transmembrane transport                                 | 10/245 | 10      | 05       | 81       | 52       |
|    | GO:0009 |                                                                       |        | 276/232 | 4.025E-0 | 0.000875 | 0.000683 |
| BP | 199     | ribonucleoside triphosphate metabolic process                         | 12/245 | 10      | 5        | 74       | 96       |
|    | GO:1901 |                                                                       |        | 193/232 | 4.1266E- | 0.000888 | 0.000694 |
| BP | 605     | alpha-amino acid metabolic process                                    | 10/245 | 10      | 05       | 98       | 3        |
|    | GO:0062 |                                                                       |        | 155/232 | 4.1443E- | 0.000888 | 0.000694 |
| BP | 013     | positive regulation of small molecule metabolic process               | 9/245  | 10      | 05       | 98       | 3        |
|    | GO:0010 |                                                                       |        | 370/232 | 4.2741E- | 0.000910 | 0.000711 |
| BP | 876     | lipid localization                                                    | 14/245 | 10      | 05       | 42       | 05       |
|    | GO:0032 |                                                                       |        | 121/232 | 4.435E-0 | 0.000938 | 0.000732 |
| BP | 411     | positive regulation of transporter activity                           | 8/245  | 10      | 5        | 13       | 68       |
|    | GO:0010 |                                                                       |        | 421/232 | 4.5361E- | 0.000952 | 0.000744 |
| BP | 959     | regulation of metal ion transport                                     | 15/245 | 10      | 05       | 9        | 22       |
|    | GO:0009 |                                                                       |        | 281/232 | 4.788E-0 | 0.000998 | 0.000780 |
| BP | 144     | purine nucleoside triphosphate metabolic process                      | 12/245 | 10      | 5        | 93       | 17       |
|    | GO:0045 |                                                                       |        | 20/2321 | 5.1386E- | 0.001057 | 0.000825 |
| BP | 821     | positive regulation of glycolytic process                             | 4/245  | 0       | 05       | 59       | 98       |
|    | GO:0060 |                                                                       |        | 20/2321 | 5.1386E- | 0.001057 | 0.000825 |
| BP | 307     | regulation of ventricular cardiac muscle cell membrane repolarization | 4/245  | 0       | 05       | 59       | 98       |
| BP | GO:0008 | cholesterol metabolic process                                         | 8/245  | 126/232 | 5.9173E- | 0.001209 | 0.000944 |

|    |         |                                                              |        |         |          |          |          |
|----|---------|--------------------------------------------------------------|--------|---------|----------|----------|----------|
|    | 203     |                                                              |        | 10      | 05       | 68       | 77       |
|    | GO:0009 |                                                              |        | 40/2321 | 6.1228E- | 0.001235 | 0.000964 |
| BP | 409     | response to cold                                             | 5/245  | 0       | 05       | 1        | 62       |
|    | GO:0086 |                                                              |        | 40/2321 | 6.1228E- | 0.001235 | 0.000964 |
| BP | 004     | regulation of cardiac muscle cell contraction                | 5/245  | 0       | 05       | 1        | 62       |
|    | GO:0030 |                                                              |        | 21/2321 | 6.2953E- | 0.001253 | 0.000978 |
| BP | 813     | positive regulation of nucleotide catabolic process          | 4/245  | 0       | 05       | 29       | 83       |
|    | GO:0051 |                                                              |        | 21/2321 | 6.2953E- | 0.001253 | 0.000978 |
| BP | 197     | positive regulation of coenzyme metabolic process            | 4/245  | 0       | 05       | 29       | 83       |
|    | GO:0001 |                                                              |        | 204/232 | 6.5793E- | 0.001301 | 0.001016 |
| BP | 666     | response to hypoxia                                          | 10/245 | 10      | 05       | 33       | 35       |
|    | GO:0046 |                                                              |        | 247/232 | 6.8012E- | 0.001336 | 0.001043 |
| BP | 034     | ATP metabolic process                                        | 11/245 | 10      | 05       | 55       | 86       |
|    | GO:0099 |                                                              |        | 22/2321 | 7.6306E- | 0.001489 | 0.001163 |
| BP | 625     | ventricular cardiac muscle cell membrane repolarization      | 4/245  | 0       | 05       | 93       | 65       |
|    | GO:0097 |                                                              |        | 168/232 | 7.7435E- | 0.001501 |          |
| BP | 164     | ammonium ion metabolic process                               | 9/245  | 10      | 05       | 91       | 0.001173 |
|    | GO:1902 |                                                              |        | 131/232 | 7.7906E- | 0.001501 |          |
| BP | 652     | secondary alcohol metabolic process                          | 8/245  | 10      | 05       | 91       | 0.001173 |
|    | GO:0001 |                                                              |        | 132/232 | 8.2187E- | 0.001574 | 0.001229 |
| BP | 508     | action potential                                             | 8/245  | 10      | 05       | 48       | 68       |
|    | GO:0009 |                                                              |        | 298/232 | 8.3948E- | 0.001598 | 0.001248 |
| BP | 141     | nucleoside triphosphate metabolic process                    | 12/245 | 10      | 05       | 16       | 18       |
|    | GO:0032 |                                                              |        | 254/232 | 8.7267E- | 0.001634 | 0.001276 |
| BP | 412     | regulation of ion transmembrane transporter activity         | 11/245 | 10      | 05       | 05       | 2        |
| BP | GO:1901 | positive regulation of potassium ion transmembrane transport | 5/245  | 43/2321 | 8.7292E- | 0.001634 | 0.001276 |

|    |         |                                                           |        |         |          |          |          |
|----|---------|-----------------------------------------------------------|--------|---------|----------|----------|----------|
|    | 381     |                                                           |        | 0       | 05       | 05       | 2        |
|    | GO:0062 |                                                           |        | 99/2321 | 8.7443E- | 0.001634 | 0.001276 |
| BP | 014     | negative regulation of small molecule metabolic process   | 7/245  | 0       | 05       | 05       | 2        |
|    | GO:0055 |                                                           |        | 69/2321 | 8.9478E- | 0.001661 | 0.001297 |
| BP | 117     | regulation of cardiac muscle contraction                  | 6/245  | 0       | 05       | 9        | 95       |
|    | GO:0016 |                                                           |        | 135/232 | 9.6218E- | 0.001776 | 0.001387 |
| BP | 125     | sterol metabolic process                                  | 8/245  | 10      | 05       | 25       | 26       |
|    | GO:0009 |                                                           |        | 136/232 | 0.000101 | 0.001848 | 0.001443 |
| BP | 166     | nucleotide catabolic process                              | 8/245  | 10      | 31       | 11       | 39       |
|    | GO:0006 |                                                           |        | 174/232 | 0.000101 | 0.001848 | 0.001443 |
| BP | 575     | cellular modified amino acid metabolic process            | 9/245  | 10      | 32       | 11       | 39       |
|    | GO:0006 |                                                           |        | 137/232 | 0.000106 | 0.001933 | 0.001509 |
| BP | 754     | ATP biosynthetic process                                  | 8/245  | 10      | 63       | 33       | 94       |
|    | GO:0099 |                                                           |        | 24/2321 | 0.000109 | 0.001964 | 0.001534 |
| BP | 623     | regulation of cardiac muscle cell membrane repolarization | 4/245  | 0       | 02       | 97       | 66       |
|    | GO:0043 |                                                           |        | 103/232 | 0.000112 | 0.002000 | 0.001562 |
| BP | 255     | regulation of carbohydrate biosynthetic process           | 7/245  | 10      | 3        | 42       | 34       |
|    | GO:1900 |                                                           |        | 103/232 | 0.000112 | 0.002000 | 0.001562 |
| BP | 542     | regulation of purine nucleotide metabolic process         | 7/245  | 10      | 3        | 42       | 34       |
|    | GO:0022 |                                                           |        | 262/232 | 0.000114 | 0.002033 | 0.001587 |
| BP | 898     | regulation of transmembrane transporter activity          | 11/245 | 10      | 81       | 2        | 95       |
|    | GO:0006 |                                                           |        | 46/2321 | 0.000121 | 0.002120 | 0.001656 |
| BP | 110     | regulation of glycolytic process                          | 5/245  | 0       | 15       | 74       | 31       |
|    | GO:0030 |                                                           |        | 46/2321 | 0.000121 | 0.002120 | 0.001656 |
| BP | 811     | regulation of nucleotide catabolic process                | 5/245  | 0       | 15       | 74       | 31       |
| BP | GO:0035 | multicellular organismal signaling                        | 8/245  | 141/232 | 0.000130 | 0.002254 | 0.001760 |

|    |         |                                                       |        |         |          |          |          |
|----|---------|-------------------------------------------------------|--------|---------|----------|----------|----------|
|    | 637     |                                                       |        | 10      | 26       | 46       | 75       |
|    | GO:0055 |                                                       |        | 141/232 | 0.000130 | 0.002254 | 0.001760 |
| BP | 088     | lipid homeostasis                                     | 8/245  | 10      | 26       | 46       | 75       |
|    | GO:0051 |                                                       |        | 10/2321 | 0.000131 | 0.002271 | 0.001773 |
| BP | 791     | medium-chain fatty acid metabolic process             | 3/245  | 0       | 99       | 42       | 99       |
|    | GO:0030 |                                                       |        | 75/2321 | 0.000142 | 0.002400 | 0.001874 |
| BP | 808     | regulation of nucleotide biosynthetic process         | 6/245  | 0       | 59       | 15       | 53       |
|    | GO:0051 |                                                       |        | 75/2321 | 0.000142 | 0.002400 | 0.001874 |
| BP | 193     | regulation of cofactor metabolic process              | 6/245  | 0       | 59       | 15       | 53       |
|    | GO:1900 |                                                       |        | 75/2321 | 0.000142 | 0.002400 | 0.001874 |
| BP | 371     | regulation of purine nucleotide biosynthetic process  | 6/245  | 0       | 59       | 15       | 53       |
|    | GO:0006 |                                                       |        | 107/232 | 0.000142 | 0.002400 | 0.001874 |
| BP | 140     | regulation of nucleotide metabolic process            | 7/245  | 10      | 62       | 15       | 53       |
|    | GO:0055 |                                                       |        | 143/232 | 0.000143 | 0.002403 | 0.001877 |
| BP | 007     | cardiac muscle cell differentiation                   | 8/245  | 10      | 61       | 49       | 14       |
|    | GO:0051 |                                                       |        | 316/232 | 0.000145 | 0.002423 | 0.001892 |
| BP | 146     | striated muscle cell differentiation                  | 12/245 | 10      | 57       | 02       | 39       |
|    | GO:1903 |                                                       |        | 48/2321 | 0.000148 | 0.002462 | 0.001923 |
| BP | 115     | regulation of actin filament-based movement           | 5/245  | 0       | 76       | 59       | 3        |
|    | GO:0090 |                                                       |        | 26/2321 | 0.000150 | 0.002483 | 0.001939 |
| BP | 208     | positive regulation of triglyceride metabolic process | 4/245  | 0       | 86       | 95       | 99       |
|    | GO:0009 |                                                       |        | 272/232 | 0.000159 | 0.002596 | 0.002027 |
| BP | 167     | purine ribonucleoside monophosphate metabolic process | 11/245 | 10      | 38       | 06       | 54       |
|    | GO:0032 |                                                       |        | 272/232 | 0.000159 | 0.002596 | 0.002027 |
| BP | 409     | regulation of transporter activity                    | 11/245 | 10      | 38       | 06       | 54       |
| BP | GO:0009 | purine nucleoside monophosphate metabolic process     | 11/245 | 273/232 | 0.000164 | 0.002666 | 0.002082 |

|    |         |                                                         |        |         |          |          |          |
|----|---------|---------------------------------------------------------|--------|---------|----------|----------|----------|
|    | 126     |                                                         |        | 10      | 55       | 04       | 2        |
|    | GO:0051 |                                                         |        | 322/232 | 0.000173 | 0.002784 | 0.002174 |
| BP | 235     | maintenance of location                                 | 12/245 | 10      | 29       | 56       | 76       |
|    | GO:0009 |                                                         |        | 147/232 | 0.000173 | 0.002784 | 0.002174 |
| BP | 206     | purine ribonucleoside triphosphate biosynthetic process | 8/245  | 10      | 69       | 56       | 76       |
|    | GO:0036 |                                                         |        | 230/232 | 0.000176 | 0.002816 | 0.002199 |
| BP | 293     | response to decreased oxygen levels                     | 10/245 | 10      | 59       | 16       | 44       |
|    | GO:0009 |                                                         |        | 276/232 | 0.000180 | 0.002857 | 0.002231 |
| BP | 161     | ribonucleoside monophosphate metabolic process          | 11/245 | 10      | 93       | 14       | 44       |
|    | GO:0009 |                                                         |        | 148/232 | 0.000181 | 0.002857 | 0.002231 |
| BP | 145     | purine nucleoside triphosphate biosynthetic process     | 8/245  | 10      | 97       | 14       | 44       |
|    | GO:1901 |                                                         |        | 148/232 | 0.000181 | 0.002857 | 0.002231 |
| BP | 292     | nucleoside phosphate catabolic process                  | 8/245  | 10      | 97       | 14       | 44       |
|    | GO:0009 |                                                         |        | 150/232 | 0.000199 | 0.003116 | 0.002433 |
| BP | 201     | ribonucleoside triphosphate biosynthetic process        | 8/245  | 10      | 5        | 35       | 89       |
|    | GO:0006 |                                                         |        | 234/232 | 0.000202 | 0.003142 | 0.002454 |
| BP | 813     | potassium ion transport                                 | 10/245 | 10      | 98       | 23       | 1        |
|    | GO:0051 |                                                         |        | 28/2321 | 0.000203 | 0.003142 | 0.002454 |
| BP | 194     | positive regulation of cofactor metabolic process       | 4/245  | 0       | 22       | 23       | 1        |
|    | GO:0043 |                                                         |        | 52/2321 | 0.000218 | 0.003356 | 0.002621 |
| BP | 268     | positive regulation of potassium ion transport          | 5/245  | 0       | 18       | 41       | 38       |
|    | GO:0006 |                                                         |        | 29/2321 | 0.000233 | 0.003512 | 0.002742 |
| BP | 536     | glutamate metabolic process                             | 4/245  | 0       | 8        | 03       | 92       |
|    | GO:0070 |                                                         |        | 29/2321 | 0.000233 | 0.003512 | 0.002742 |
| BP | 296     | sarcoplasmic reticulum calcium ion transport            | 4/245  | 0       | 8        | 03       | 92       |
| BP | GO:0090 | regulation of cholesterol metabolic process             | 4/245  | 29/2321 | 0.000233 | 0.003512 | 0.002742 |



|    |         |                                                          |        |         |          |          |          |
|----|---------|----------------------------------------------------------|--------|---------|----------|----------|----------|
|    | 181     |                                                          |        | 0       | 8        | 03       | 92       |
|    | GO:0099 |                                                          |        | 29/2321 | 0.000233 | 0.003512 | 0.002742 |
| BP | 622     | cardiac muscle cell membrane repolarization              | 4/245  | 0       | 8        | 03       | 92       |
|    | GO:0051 |                                                          |        | 383/232 | 0.000234 | 0.003512 | 0.002742 |
| BP | 260     | protein homooligomerization                              | 13/245 | 10      | 06       | 03       | 92       |
|    | GO:0010 |                                                          |        | 12/2321 | 0.000238 | 0.003515 | 0.002745 |
| BP | 889     | regulation of sequestering of triglyceride               | 3/245  | 0       | 22       | 24       | 43       |
|    | GO:0009 |                                                          |        | 285/232 | 0.000238 | 0.003515 | 0.002745 |
| BP | 123     | nucleoside monophosphate metabolic process               | 11/245 | 10      | 61       | 24       | 43       |
|    | GO:0006 |                                                          |        | 154/232 | 0.000238 | 0.003515 | 0.002745 |
| BP | 937     | regulation of muscle contraction                         | 8/245  | 10      | 74       | 24       | 43       |
|    | GO:0042 |                                                          |        | 195/232 | 0.000238 | 0.003515 | 0.002745 |
| BP | 180     | cellular ketone metabolic process                        | 9/245  | 10      | 89       | 24       | 43       |
|    | GO:0043 |                                                          |        | 117/232 | 0.000248 | 0.003631 | 0.002836 |
| BP | 500     | muscle adaptation                                        | 7/245  | 10      | 15       | 67       | 36       |
|    | GO:0006 |                                                          |        | 83/2321 | 0.000249 | 0.003631 | 0.002836 |
| BP | 942     | regulation of striated muscle contraction                | 6/245  | 0       | 19       | 67       | 36       |
|    | GO:0045 |                                                          |        | 157/232 | 0.000272 | 0.003947 | 0.003082 |
| BP | 834     | positive regulation of lipid metabolic process           | 8/245  | 10      | 14       | 32       | 89       |
|    | GO:0009 |                                                          |        | 158/232 | 0.000284 | 0.004062 | 0.003172 |
| BP | 127     | purine nucleoside monophosphate biosynthetic process     | 8/245  | 10      | 09       | 57       | 9        |
|    | GO:0009 |                                                          |        | 158/232 | 0.000284 | 0.004062 | 0.003172 |
| BP | 168     | purine ribonucleoside monophosphate biosynthetic process | 8/245  | 10      | 09       | 57       | 9        |
|    | GO:0046 |                                                          |        | 158/232 | 0.000284 | 0.004062 | 0.003172 |
| BP | 496     | nicotinamide nucleotide metabolic process                | 8/245  | 10      | 09       | 57       | 9        |
| BP | GO:0002 | regulation of the force of heart contraction             | 4/245  | 31/2321 | 0.000304 | 0.004316 | 0.003370 |

|    |         |                                                                   |       |         |          |          |          |
|----|---------|-------------------------------------------------------------------|-------|---------|----------|----------|----------|
|    | 026     |                                                                   |       | 0       | 65       | 06       | 87       |
|    | GO:0086 |                                                                   |       | 31/2321 | 0.000304 | 0.004316 | 0.003370 |
| BP | 010     | membrane depolarization during action potential                   | 4/245 | 0       | 65       | 06       | 87       |
|    | GO:0009 |                                                                   |       | 160/232 | 0.000309 | 0.004321 | 0.003374 |
| BP | 142     | nucleoside triphosphate biosynthetic process                      | 8/245 | 10      | 27       | 23       | 91       |
|    | GO:0019 |                                                                   |       | 160/232 | 0.000309 | 0.004321 | 0.003374 |
| BP | 362     | pyridine nucleotide metabolic process                             | 8/245 | 10      | 27       | 23       | 91       |
|    | GO:1903 |                                                                   |       | 160/232 | 0.000309 | 0.004321 | 0.003374 |
| BP | 169     | regulation of calcium ion transmembrane transport                 | 8/245 | 10      | 27       | 23       | 91       |
|    | GO:0009 |                                                                   |       | 162/232 | 0.000336 | 0.004676 | 0.003652 |
| BP | 156     | ribonucleoside monophosphate biosynthetic process                 | 8/245 | 10      | 24       | 67       | 51       |
|    | GO:0060 |                                                                   |       | 32/2321 | 0.000345 | 0.004759 | 0.003716 |
| BP | 306     | regulation of membrane repolarization                             | 4/245 | 0       | 3        | 2        | 97       |
|    | GO:2001 |                                                                   |       | 32/2321 | 0.000345 | 0.004759 | 0.003716 |
| BP | 171     | positive regulation of ATP biosynthetic process                   | 4/245 | 0       | 3        | 2        | 97       |
|    | GO:0045 |                                                                   |       | 163/232 | 0.000350 | 0.004808 | 0.003755 |
| BP | 333     | cellular respiration                                              | 8/245 | 10      | 43       | 16       | 2        |
|    | GO:0055 |                                                                   |       | 207/232 | 0.000370 | 0.005064 | 0.003955 |
| BP | 001     | muscle cell development                                           | 9/245 | 10      | 78       | 51       | 42       |
|    | GO:0072 |                                                                   |       | 165/232 | 0.000380 | 0.005171 | 0.004038 |
| BP | 524     | pyridine-containing compound metabolic process                    | 8/245 | 10      | 27       | 04       | 62       |
|    | GO:0006 |                                                                   |       | 90/2321 | 0.000386 | 0.005206 | 0.004066 |
| BP | 096     | glycolytic process                                                | 6/245 | 0       | 61       | 93       | 65       |
|    | GO:0045 |                                                                   |       | 90/2321 | 0.000386 | 0.005206 | 0.004066 |
| BP | 833     | negative regulation of lipid metabolic process                    | 6/245 | 0       | 61       | 93       | 65       |
| BP | GO:0010 | regulation of cardiac muscle contraction by calcium ion signaling | 3/245 | 14/2321 | 0.000388 | 0.005206 | 0.004066 |

|    |         |                                                          |       |         |          |          |          |
|----|---------|----------------------------------------------------------|-------|---------|----------|----------|----------|
|    | 882     |                                                          |       | 0       | 04       | 93       | 65       |
|    | GO:0006 |                                                          |       | 91/2321 | 0.000410 | 0.005453 | 0.004258 |
| BP | 757     | ATP generation from ADP                                  | 6/245 | 0       | 3        | 18       | 97       |
|    | GO:1903 |                                                          |       | 91/2321 | 0.000410 | 0.005453 | 0.004258 |
| BP | 578     | regulation of ATP metabolic process                      | 6/245 | 0       | 3        | 18       | 97       |
|    | GO:0046 |                                                          |       | 210/232 | 0.000411 | 0.005453 | 0.004258 |
| BP | 434     | organophosphate catabolic process                        | 9/245 | 10      | 76       | 18       | 97       |
|    | GO:0009 |                                                          |       | 168/232 | 0.000428 | 0.005655 | 0.004416 |
| BP | 124     | nucleoside monophosphate biosynthetic process            | 8/245 | 10      | 89       | 4        | 91       |
|    | GO:0097 |                                                          |       | 61/2321 | 0.000462 | 0.006040 | 0.004717 |
| BP | 006     | regulation of plasma lipoprotein particle levels         | 5/245 | 0       | 4        | 18       | 42       |
|    | GO:0046 |                                                          |       | 170/232 | 0.000464 | 0.006040 | 0.004717 |
| BP | 890     | regulation of lipid biosynthetic process                 | 8/245 | 10      | 02       | 18       | 42       |
|    | GO:0060 |                                                          |       | 170/232 | 0.000464 | 0.006040 | 0.004717 |
| BP | 401     | cytosolic calcium ion transport                          | 8/245 | 10      | 02       | 18       | 42       |
|    | GO:0030 |                                                          |       | 15/2321 | 0.000481 | 0.006108 | 0.004770 |
| BP | 730     | sequestering of triglyceride                             | 3/245 | 0       | 28       | 23       | 57       |
|    | GO:0035 |                                                          |       | 15/2321 | 0.000481 | 0.006108 | 0.004770 |
| BP | 337     | fatty-acyl-CoA metabolic process                         | 3/245 | 0       | 28       | 23       | 57       |
|    | GO:0055 |                                                          |       | 15/2321 | 0.000481 | 0.006108 | 0.004770 |
| BP | 089     | fatty acid homeostasis                                   | 3/245 | 0       | 28       | 23       | 57       |
|    | GO:0086 |                                                          |       | 15/2321 | 0.000481 | 0.006108 | 0.004770 |
| BP | 014     | atrial cardiac muscle cell action potential              | 3/245 | 0       | 28       | 23       | 57       |
|    | GO:0086 |                                                          |       | 15/2321 | 0.000481 | 0.006108 | 0.004770 |
| BP | 026     | atrial cardiac muscle cell to AV node cell signaling     | 3/245 | 0       | 28       | 23       | 57       |
| BP | GO:0086 | atrial cardiac muscle cell to AV node cell communication | 3/245 | 15/2321 | 0.000481 | 0.006108 | 0.004770 |

|    |         |                                                               |        |         |          |          |          |
|----|---------|---------------------------------------------------------------|--------|---------|----------|----------|----------|
|    | 066     |                                                               |        | 0       | 28       | 23       | 57       |
|    | GO:0042 |                                                               |        | 94/2321 | 0.000488 | 0.006170 | 0.004819 |
| BP | 866     | pyruvate biosynthetic process                                 | 6/245  | 0       | 21       | 53       | 23       |
|    | GO:0034 |                                                               |        | 172/232 | 0.000501 | 0.006311 | 0.004929 |
| BP | 404     | nucleobase-containing small molecule biosynthetic process     | 8/245  | 10      | 45       | 62       | 42       |
|    | GO:2001 |                                                               |        | 63/2321 | 0.000537 | 0.006732 | 0.005257 |
| BP | 169     | regulation of ATP biosynthetic process                        | 5/245  | 0       | 06       | 08       | 8        |
|    | GO:0006 |                                                               |        | 314/232 | 0.000540 | 0.006749 | 0.005271 |
| BP | 066     | alcohol metabolic process                                     | 11/245 | 10      | 67       | 53       | 43       |
|    | GO:0006 |                                                               |        | 36/2321 | 0.000547 | 0.006775 | 0.005292 |
| BP | 458     | 'de novo' protein folding                                     | 4/245  | 0       | 24       | 93       | 05       |
|    | GO:0071 |                                                               |        | 36/2321 | 0.000547 | 0.006775 | 0.005292 |
| BP | 398     | cellular response to fatty acid                               | 4/245  | 0       | 24       | 93       | 05       |
|    | GO:0051 |                                                               |        | 134/232 | 0.000564 | 0.006963 | 0.005438 |
| BP | 928     | positive regulation of calcium ion transport                  | 7/245  | 10      | 66       | 41       | 47       |
|    | GO:0043 |                                                               |        | 97/2321 | 0.000577 | 0.007089 | 0.005536 |
| BP | 502     | regulation of muscle adaptation                               | 6/245  | 0       | 19       | 18       | 7        |
|    | GO:0006 |                                                               |        | 16/2321 | 0.000587 |          | 0.005592 |
| BP | 103     | 2-oxoglutarate metabolic process                              | 3/245  | 0       | 74       | 0.007161 | 79       |
|    | GO:1903 |                                                               |        | 16/2321 | 0.000587 |          | 0.005592 |
| BP | 779     | regulation of cardiac conduction                              | 3/245  | 0       | 74       | 0.007161 | 79       |
|    | GO:0006 |                                                               |        | 177/232 | 0.000605 | 0.007309 | 0.005708 |
| BP | 733     | oxidoreduction coenzyme metabolic process                     | 8/245  | 10      | 82       | 01       | 39       |
|    | GO:0030 |                                                               |        | 37/2321 | 0.000608 | 0.007309 | 0.005708 |
| BP | 810     | positive regulation of nucleotide biosynthetic process        | 4/245  | 0       | 52       | 01       | 39       |
| BP | GO:1900 | positive regulation of purine nucleotide biosynthetic process | 4/245  | 37/2321 | 0.000608 | 0.007309 | 0.005708 |

|    |         |                                                                       |        |         |          |          |          |
|----|---------|-----------------------------------------------------------------------|--------|---------|----------|----------|----------|
|    | 373     |                                                                       |        | 0       | 52       | 01       | 39       |
|    | GO:0046 |                                                                       |        | 98/2321 | 0.000609 | 0.007309 | 0.005708 |
| BP | 031     | ADP metabolic process                                                 | 6/245  | 0       | 48       | 01       | 39       |
|    | GO:0001 |                                                                       |        | 179/232 | 0.000652 | 0.007760 | 0.006060 |
| BP | 659     | temperature homeostasis                                               | 8/245  | 10      | 19       | 02       | 63       |
|    | GO:0006 |                                                                       |        | 179/232 | 0.000652 | 0.007760 | 0.006060 |
| BP | 839     | mitochondrial transport                                               | 8/245  | 10      | 19       | 02       | 63       |
|    | GO:0051 |                                                                       |        | 272/232 | 0.000664 | 0.007871 | 0.006147 |
| BP | 924     | regulation of calcium ion transport                                   | 10/245 | 10      | 17       | 86       | 97       |
|    | GO:0010 |                                                                       |        | 17/2321 | 0.000708 | 0.008296 | 0.006479 |
| BP | 867     | positive regulation of triglyceride biosynthetic process              | 3/245  | 0       | 14       | 09       | 31       |
|    | GO:0042 |                                                                       |        | 17/2321 | 0.000708 | 0.008296 | 0.006479 |
| BP | 135     | neurotransmitter catabolic process                                    | 3/245  | 0       | 14       | 09       | 31       |
|    | GO:0086 |                                                                       |        | 17/2321 | 0.000708 | 0.008296 | 0.006479 |
| BP | 012     | membrane depolarization during cardiac muscle cell action potential   | 3/245  | 0       | 14       | 09       | 31       |
|    | GO:0046 |                                                                       |        | 325/232 | 0.000718 | 0.008382 | 0.006546 |
| BP | 486     | glycerolipid metabolic process                                        | 11/245 | 10      | 22       | 01       | 41       |
|    | GO:0031 |                                                                       |        | 275/232 | 0.000722 | 0.008399 | 0.006560 |
| BP | 647     | regulation of protein stability                                       | 10/245 | 10      | 51       | 87       | 36       |
|    | GO:0035 |                                                                       |        | 182/232 | 0.000727 | 0.008420 | 0.006576 |
| BP | 051     | cardiocyte differentiation                                            | 8/245  | 10      | 08       | 82       | 72       |
|    | GO:1901 |                                                                       |        | 39/2321 | 0.000745 | 0.008600 | 0.006717 |
| BP | 021     | positive regulation of calcium ion transmembrane transporter activity | 4/245  | 0       | 44       | 75       | 25       |
|    | GO:0006 |                                                                       |        | 103/232 | 0.000792 | 0.009041 | 0.007061 |
| BP | 165     | nucleoside diphosphate phosphorylation                                | 6/245  | 10      | 54       | 51       | 48       |
| BP | GO:0009 | purine nucleoside diphosphate metabolic process                       | 6/245  | 103/232 | 0.000792 | 0.009041 | 0.007061 |

|    |         |                                                     |        |         |          |          |          |
|----|---------|-----------------------------------------------------|--------|---------|----------|----------|----------|
|    | 135     |                                                     |        | 10      | 54       | 51       | 48       |
|    | GO:0009 |                                                     |        | 103/232 | 0.000792 | 0.009041 | 0.007061 |
| BP | 179     | purine ribonucleoside diphosphate metabolic process | 6/245  | 10      | 54       | 51       | 48       |
|    | GO:0072 |                                                     |        | 279/232 | 0.000806 | 0.009169 | 0.007161 |
| BP | 659     | protein localization to plasma membrane             | 10/245 | 10      | 81       | 91       | 77       |
|    | GO:0070 |                                                     |        | 280/232 | 0.000829 | 0.009388 | 0.007332 |
| BP | 588     | calcium ion transmembrane transport                 | 10/245 | 10      | 1        | 26       | 29       |
|    | GO:0046 |                                                     |        | 18/2321 | 0.000843 | 0.009512 | 0.007429 |
| BP | 321     | positive regulation of fatty acid oxidation         | 3/245  | 0       | 16       | 14       | 05       |
|    | GO:0019 |                                                     |        | 70/2321 | 0.000871 | 0.009780 | 0.007638 |
| BP | 915     | lipid storage                                       | 5/245  | 0       | 13       | 77       | 85       |
|    | GO:0070 |                                                     |        | 282/232 | 0.000875 | 0.009780 | 0.007638 |
| BP | 482     | response to oxygen levels                           | 10/245 | 10      | 21       | 77       | 85       |
|    | GO:0046 |                                                     |        | 105/232 | 0.000876 | 0.009780 | 0.007638 |
| BP | 939     | nucleotide phosphorylation                          | 6/245  | 10      | 61       | 77       | 85       |
|    | GO:0042 |                                                     |        | 41/2321 | 0.000902 | 0.009999 | 0.007809 |
| BP | 304     | regulation of fatty acid biosynthetic process       | 4/245  | 0       | 79       | 65       | 8        |
|    | GO:0086 |                                                     |        | 41/2321 | 0.000902 | 0.009999 | 0.007809 |
| BP | 009     | membrane repolarization                             | 4/245  | 0       | 79       | 65       | 8        |
|    | GO:0019 |                                                     |        | 106/232 | 0.000921 | 0.010165 | 0.007939 |
| BP | 359     | nicotinamide nucleotide biosynthetic process        | 6/245  | 10      | 14       | 88       | 62       |
|    | GO:0009 |                                                     |        | 107/232 | 0.000967 | 0.010637 | 0.008308 |
| BP | 185     | ribonucleoside diphosphate metabolic process        | 6/245  | 10      | 39       | 74       | 15       |
|    | GO:0010 |                                                     |        | 42/2321 | 0.000989 | 0.010804 | 0.008438 |
| BP | 883     | regulation of lipid storage                         | 4/245  | 0       | 63       | 37       | 29       |
| BP | GO:0045 | positive regulation of fatty acid metabolic process | 4/245  | 42/2321 | 0.000989 | 0.010804 | 0.008438 |

|    |         |                                                   |        |         |          |          |          |
|----|---------|---------------------------------------------------|--------|---------|----------|----------|----------|
|    | 923     |                                                   |        | 0       | 63       | 37       | 29       |
|    | GO:0031 |                                                   |        | 19/2321 | 0.000993 | 0.010807 | 0.008440 |
| BP | 998     | regulation of fatty acid beta-oxidation           | 3/245  | 0       | 49       | 7        | 89       |
|    | GO:0014 |                                                   |        | 449/232 | 0.001035 | 0.011227 | 0.008768 |
| BP | 706     | striated muscle tissue development                | 13/245 | 10      | 75       | 37       | 66       |
|    | GO:0019 |                                                   |        | 109/232 | 0.001065 | 0.011505 | 0.008986 |
| BP | 363     | pyridine nucleotide biosynthetic process          | 6/245  | 10      | 22       | 91       | 2        |
|    | GO:0015 |                                                   |        | 150/232 | 0.001097 | 0.011817 | 0.009229 |
| BP | 718     | monocarboxylic acid transport                     | 7/245  | 10      | 95       | 53       | 57       |
|    | GO:0032 |                                                   |        | 75/2321 | 0.001190 | 0.012767 | 0.009971 |
| BP | 543     | mitochondrial translation                         | 5/245  | 0       | 44       | 9        | 82       |
|    | GO:0006 |                                                   |        | 153/232 | 0.001231 | 0.013163 | 0.010280 |
| BP | 457     | protein folding                                   | 7/245  | 10      | 62       | 24       | 58       |
|    | GO:0072 |                                                   |        | 113/232 | 0.001283 | 0.013592 | 0.010615 |
| BP | 525     | pyridine-containing compound biosynthetic process | 6/245  | 10      | 53       | 69       | 99       |
|    | GO:0090 |                                                   |        | 45/2321 | 0.001285 | 0.013592 | 0.010615 |
| BP | 207     | regulation of triglyceride metabolic process      | 4/245  | 0       | 19       | 69       | 99       |
|    | GO:1903 |                                                   |        | 45/2321 | 0.001285 | 0.013592 | 0.010615 |
| BP | 580     | positive regulation of ATP metabolic process      | 4/245  | 0       | 19       | 69       | 99       |
|    | GO:2001 |                                                   |        | 77/2321 | 0.001339 | 0.014101 | 0.011013 |
| BP | 259     | positive regulation of cation channel activity    | 5/245  | 0       | 75       | 25       | 18       |
|    | GO:0010 |                                                   |        | 21/2321 | 0.001342 | 0.014101 | 0.011013 |
| BP | 866     | regulation of triglyceride biosynthetic process   | 3/245  | 0       | 54       | 25       | 18       |
|    | GO:0044 |                                                   |        | 463/232 | 0.001364 | 0.014277 | 0.011151 |
| BP | 270     | cellular nitrogen compound catabolic process      | 13/245 | 10      | 03       | 81       | 07       |
| BP | GO:0046 | carboxylic acid transport                         | 10/245 | 301/232 | 0.001427 | 0.014893 | 0.011631 |

|    |         |                                                                          |        |         |          |          |          |
|----|---------|--------------------------------------------------------------------------|--------|---------|----------|----------|----------|
|    | 942     |                                                                          |        | 10      | 72       | 3        | 77       |
|    | GO:0015 |                                                                          |        | 302/232 | 0.001463 | 0.015211 | 0.011880 |
| BP | 849     | organic acid transport                                                   | 10/245 | 10      | 25       | 78       | 51       |
|    | GO:0007 |                                                                          |        | 357/232 | 0.001528 | 0.015788 | 0.012331 |
| BP | 178     | transmembrane receptor protein serine/threonine kinase signaling pathway | 11/245 | 10      | 92       | 71       | 09       |
|    | GO:0046 |                                                                          |        | 469/232 | 0.001529 | 0.015788 | 0.012331 |
| BP | 700     | heterocycle catabolic process                                            | 13/245 | 10      | 11       | 71       | 09       |
|    | GO:0007 |                                                                          |        | 254/232 | 0.001579 | 0.016253 | 0.012694 |
| BP | 626     | locomotory behavior                                                      | 9/245  | 10      | 46       | 51       | 1        |
|    | GO:0060 |                                                                          |        | 472/232 | 0.001617 | 0.016590 | 0.012957 |
| BP | 537     | muscle tissue development                                                | 13/245 | 10      | 67       | 69       | 45       |
|    | GO:0010 |                                                                          |        | 48/2321 | 0.001637 | 0.016737 | 0.013072 |
| BP | 107     | potassium ion import                                                     | 4/245  | 0       | 48       | 42       | 04       |
|    | GO:0006 |                                                                          |        | 473/232 | 0.001648 | 0.016789 | 0.013113 |
| BP | 874     | cellular calcium ion homeostasis                                         | 13/245 | 10      | 12       | 93       | 05       |
|    | GO:0014 |                                                                          |        | 49/2321 | 0.001768 | 0.017925 | 0.013999 |
| BP | 888     | striated muscle adaptation                                               | 4/245  | 0       | 43       | 28       | 77       |
|    | GO:0009 |                                                                          |        | 163/232 | 0.001771 | 0.017925 | 0.013999 |
| BP | 266     | response to temperature stimulus                                         | 7/245  | 10      | 34       | 28       | 77       |
|    | GO:0009 |                                                                          |        | 121/232 | 0.001821 | 0.018368 | 0.014345 |
| BP | 132     | nucleoside diphosphate metabolic process                                 | 6/245  | 10      | 15       | 28       | 76       |
|    | GO:0048 |                                                                          |        | 260/232 | 0.001852 | 0.018620 | 0.014542 |
| BP | 738     | cardiac muscle tissue development                                        | 9/245  | 10      | 25       | 3        | 58       |
|    | GO:1901 |                                                                          |        | 83/2321 | 0.001870 | 0.018745 |          |
| BP | 019     | regulation of calcium ion transmembrane transporter activity             | 5/245  | 0       | 81       | 03       | 0.01464  |
| BP | GO:0006 | calcium ion transport                                                    | 12/245 | 423/232 | 0.001898 | 0.018881 | 0.014746 |



|    |         |                                                             |        |         |          |          |          |
|----|---------|-------------------------------------------------------------|--------|---------|----------|----------|----------|
|    | 816     |                                                             |        | 10      | 7        | 9        | 9        |
|    | GO:0045 |                                                             |        | 50/2321 | 0.001906 | 0.018881 | 0.014746 |
| BP | 981     | positive regulation of nucleotide metabolic process         | 4/245  | 0       | 47       | 9        | 9        |
|    | GO:1900 |                                                             |        | 50/2321 | 0.001906 | 0.018881 | 0.014746 |
| BP | 544     | positive regulation of purine nucleotide metabolic process  | 4/245  | 0       | 47       | 9        | 9        |
|    | GO:1901 |                                                             |        | 481/232 | 0.001909 | 0.018881 | 0.014746 |
| BP | 615     | organic hydroxy compound metabolic process                  | 13/245 | 10      | 27       | 9        | 9        |
|    | GO:1901 |                                                             |        | 84/2321 | 0.001972 | 0.019442 | 0.015185 |
| BP | 379     | regulation of potassium ion transmembrane transport         | 5/245  | 0       | 38       | 95       | 08       |
|    | GO:0009 |                                                             |        | 24/2321 | 0.001995 | 0.019611 | 0.015317 |
| BP | 065     | glutamine family amino acid catabolic process               | 3/245  | 0       | 96       | 95       | 07       |
|    | GO:0070 |                                                             |        | 51/2321 | 0.002051 | 0.020095 | 0.015694 |
| BP | 542     | response to fatty acid                                      | 4/245  | 0       | 8        | 74       | 92       |
|    | GO:0070 |                                                             |        | 86/2321 | 0.002187 | 0.021318 | 0.016649 |
| BP | 509     | calcium ion import                                          | 5/245  | 0       | 52       | 13       | 61       |
|    | GO:0051 |                                                             |        | 374/232 | 0.002199 | 0.021318 | 0.016649 |
| BP | 480     | regulation of cytosolic calcium ion concentration           | 11/245 | 10      | 09       | 13       | 61       |
|    | GO:0055 |                                                             |        | 489/232 | 0.002203 | 0.021318 | 0.016649 |
| BP | 074     | calcium ion homeostasis                                     | 13/245 | 10      | 71       | 13       | 61       |
|    | GO:0061 |                                                             |        | 52/2321 | 0.002204 | 0.021318 | 0.016649 |
| BP | 077     | chaperone-mediated protein folding                          | 4/245  | 0       | 6        | 13       | 61       |
|    | GO:0001 |                                                             |        | 170/232 | 0.002247 | 0.021489 | 0.016783 |
| BP | 890     | placenta development                                        | 7/245  | 10      | 22       | 94       | 79       |
|    | GO:1901 |                                                             |        | 25/2321 | 0.002250 | 0.021489 | 0.016783 |
| BP | 032     | negative regulation of response to reactive oxygen species  | 3/245  | 0       | 59       | 94       | 79       |
| BP | GO:1903 | negative regulation of hydrogen peroxide-induced cell death | 3/245  | 25/2321 | 0.002250 | 0.021489 | 0.016783 |

|    |         |                                                                              |        |         |          |          |          |
|----|---------|------------------------------------------------------------------------------|--------|---------|----------|----------|----------|
|    | 206     |                                                                              |        | 0       | 59       | 94       | 79       |
|    | GO:2001 |                                                                              |        | 25/2321 | 0.002250 | 0.021489 | 0.016783 |
| BP | 039     | negative regulation of cellular response to drug                             | 3/245  | 0       | 59       | 94       | 79       |
|    | GO:0043 |                                                                              |        | 171/232 | 0.002322 | 0.022107 | 0.017266 |
| BP | 271     | negative regulation of ion transport                                         | 7/245  | 10      | 55       | 75       | 31       |
|    | GO:0043 |                                                                              |        | 324/232 | 0.002445 | 0.023205 | 0.018123 |
| BP | 434     | response to peptide hormone                                                  | 10/245 | 10      | 48       | 42       | 6        |
|    | GO:0003 |                                                                              |        | 26/2321 | 0.002524 | 0.023537 | 0.018382 |
| BP | 299     | muscle hypertrophy in response to stress                                     | 3/245  | 0       | 46       | 55       | 99       |
|    | GO:0014 |                                                                              |        | 26/2321 | 0.002524 | 0.023537 | 0.018382 |
| BP | 898     | cardiac muscle hypertrophy in response to stress                             | 3/245  | 0       | 46       | 55       | 99       |
|    | GO:0045 |                                                                              |        | 26/2321 | 0.002524 | 0.023537 | 0.018382 |
| BP | 117     | azole transport                                                              | 3/245  | 0       | 46       | 55       | 99       |
|    | GO:0098 |                                                                              |        | 26/2321 | 0.002524 | 0.023537 | 0.018382 |
| BP | 901     | regulation of cardiac muscle cell action potential                           | 3/245  | 0       | 46       | 55       | 99       |
|    | GO:1902 |                                                                              |        | 26/2321 | 0.002524 | 0.023537 | 0.018382 |
| BP | 175     | regulation of oxidative stress-induced intrinsic apoptotic signaling pathway | 3/245  | 0       | 46       | 55       | 99       |
|    | GO:0046 |                                                                              |        | 54/2321 | 0.002533 | 0.023537 | 0.018382 |
| BP | 503     | glycerolipid catabolic process                                               | 4/245  | 0       | 4        | 55       | 99       |
|    | GO:0072 |                                                                              |        | 497/232 | 0.002534 | 0.023537 | 0.018382 |
| BP | 503     | cellular divalent inorganic cation homeostasis                               | 13/245 | 10      | 57       | 55       | 99       |
|    | GO:0042 |                                                                              |        | 439/232 | 0.002574 | 0.023835 | 0.018615 |
| BP | 391     | regulation of membrane potential                                             | 12/245 | 10      | 5        | 63       | 8        |
|    | GO:1901 |                                                                              |        | 384/232 | 0.002693 | 0.024862 | 0.019418 |
| BP | 652     | response to peptide                                                          | 11/245 | 10      | 63       | 98       | 16       |
| BP | GO:0010 | regulation of cardiac muscle cell apoptotic process                          | 4/245  | 55/2321 | 0.002709 | 0.024936 | 0.019475 |

|    |         |                                                                         |        |         |          |          |          |
|----|---------|-------------------------------------------------------------------------|--------|---------|----------|----------|----------|
|    | 665     |                                                                         |        | 0       | 77       | 44       | 53       |
|    | GO:0016 |                                                                         |        | 176/232 | 0.002728 | 0.025036 | 0.019553 |
| BP | 202     | regulation of striated muscle tissue development                        | 7/245  | 10      | 83       | 17       | 43       |
|    | GO:0006 |                                                                         |        | 330/232 | 0.002789 | 0.025515 | 0.019927 |
| BP | 869     | lipid transport                                                         | 10/245 | 10      | 48       | 76       | 99       |
|    | GO:0014 |                                                                         |        | 27/2321 | 0.002818 | 0.025623 | 0.020012 |
| BP | 887     | cardiac muscle adaptation                                               | 3/245  | 0       | 07       | 38       | 04       |
|    | GO:1901 |                                                                         |        | 27/2321 | 0.002818 | 0.025623 | 0.020012 |
| BP | 018     | positive regulation of potassium ion transmembrane transporter activity | 3/245  | 0       | 07       | 38       | 04       |
|    | GO:0065 |                                                                         |        | 56/2321 | 0.002894 | 0.026238 | 0.020492 |
| BP | 002     | intracellular protein transmembrane transport                           | 4/245  | 0       | 38       | 91       | 78       |
|    | GO:1901 |                                                                         |        | 179/232 | 0.002997 | 0.027093 | 0.021160 |
| BP | 861     | regulation of muscle tissue development                                 | 7/245  | 10      | 51       | 25       | 02       |
|    | GO:0001 |                                                                         |        | 93/2321 | 0.003076 | 0.027533 | 0.021503 |
| BP | 676     | long-chain fatty acid metabolic process                                 | 5/245  | 0       | 16       | 61       | 94       |
|    | GO:0046 |                                                                         |        | 93/2321 | 0.003076 | 0.027533 | 0.021503 |
| BP | 889     | positive regulation of lipid biosynthetic process                       | 5/245  | 0       | 16       | 61       | 94       |
|    | GO:0050 |                                                                         |        | 57/2321 | 0.003087 | 0.027533 | 0.021503 |
| BP | 994     | regulation of lipid catabolic process                                   | 4/245  | 0       | 4        | 61       | 94       |
|    | GO:0071 |                                                                         |        | 57/2321 | 0.003087 | 0.027533 | 0.021503 |
| BP | 806     | protein transmembrane transport                                         | 4/245  | 0       | 4        | 61       | 94       |
|    | GO:0048 |                                                                         |        | 180/232 | 0.003091 | 0.027533 | 0.021503 |
| BP | 634     | regulation of muscle organ development                                  | 7/245  | 10      | 43       | 61       | 94       |
|    | GO:0005 |                                                                         |        | 28/2321 | 0.003131 | 0.027731 | 0.021658 |
| BP | 979     | regulation of glycogen biosynthetic process                             | 3/245  | 0       | 85       | 43       | 44       |
| BP | GO:0010 | regulation of glucan biosynthetic process                               | 3/245  | 28/2321 | 0.003131 | 0.027731 | 0.021658 |

|    |         |                                                      |        |         |          |          |          |
|----|---------|------------------------------------------------------|--------|---------|----------|----------|----------|
|    | 962     |                                                      |        | 0       | 85       | 43       | 44       |
|    | GO:0010 |                                                      |        | 58/2321 | 0.003289 | 0.028954 | 0.022613 |
| BP | 662     | regulation of striated muscle cell apoptotic process | 4/245  | 0       | 03       | 91       | 99       |
|    | GO:0098 |                                                      |        | 58/2321 | 0.003289 | 0.028954 | 0.022613 |
| BP | 900     | regulation of action potential                       | 4/245  | 0       | 03       | 91       | 99       |
|    | GO:0010 |                                                      |        | 59/2321 | 0.003499 | 0.030718 | 0.023991 |
| BP | 659     | cardiac muscle cell apoptotic process                | 4/245  | 0       | 45       | 51       | 37       |
|    | GO:0071 |                                                      |        | 96/2321 | 0.003527 | 0.030783 | 0.024042 |
| BP | 456     | cellular response to hypoxia                         | 5/245  | 0       | 08       | 63       | 23       |
|    | GO:0120 |                                                      |        | 96/2321 | 0.003527 | 0.030783 | 0.024042 |
| BP | 162     | positive regulation of cold-induced thermogenesis    | 5/245  | 0       | 08       | 63       | 23       |
|    | GO:1990 |                                                      |        | 344/232 | 0.003743 | 0.032580 | 0.025445 |
| BP | 778     | protein localization to cell periphery               | 10/245 | 10      | 62       | 15       | 33       |
|    | GO:0042 |                                                      |        | 30/2321 | 0.003821 | 0.033070 | 0.025828 |
| BP | 026     | protein refolding                                    | 3/245  | 0       | 65       | 3        | 14       |
|    | GO:0051 |                                                      |        | 30/2321 | 0.003821 | 0.033070 | 0.025828 |
| BP | 085     | chaperone cofactor-dependent protein refolding       | 3/245  | 0       | 65       | 3        | 14       |
|    | GO:0045 |                                                      |        | 141/232 | 0.003903 | 0.033680 | 0.026304 |
| BP | 017     | glycerolipid biosynthetic process                    | 6/245  | 10      | 24       | 63       | 81       |
|    | GO:1905 |                                                      |        | 61/2321 | 0.003947 | 0.033965 | 0.026526 |
| BP | 207     | regulation of cardiocyte differentiation             | 4/245  | 0       | 35       | 05       | 94       |
|    | GO:0071 |                                                      |        | 142/232 | 0.004040 | 0.034472 | 0.026923 |
| BP | 331     | cellular response to hexose stimulus                 | 6/245  | 10      | 3        | 68       | 4        |
|    | GO:0106 |                                                      |        | 142/232 | 0.004040 | 0.034472 | 0.026923 |
| BP | 106     | cold-induced thermogenesis                           | 6/245  | 10      | 3        | 68       | 4        |
| BP | GO:0120 | regulation of cold-induced thermogenesis             | 6/245  | 142/232 | 0.004040 | 0.034472 | 0.026923 |

|    |         |                                                   |        |         |          |          |          |
|----|---------|---------------------------------------------------|--------|---------|----------|----------|----------|
|    | 161     |                                                   |        | 10      | 3        | 68       | 4        |
|    | GO:0071 |                                                   |        | 143/232 | 0.004180 | 0.035143 | 0.027447 |
| BP | 326     | cellular response to monosaccharide stimulus      | 6/245  | 10      | 89       | 47       | 3        |
|    | GO:0010 |                                                   |        | 62/2321 | 0.004185 | 0.035143 | 0.027447 |
| BP | 658     | striated muscle cell apoptotic process            | 4/245  | 0       | 19       | 47       | 3        |
|    | GO:0001 |                                                   |        | 31/2321 | 0.004198 | 0.035143 | 0.027447 |
| BP | 832     | blastocyst growth                                 | 3/245  | 0       | 47       | 47       | 3        |
|    | GO:0006 |                                                   |        | 31/2321 | 0.004198 | 0.035143 | 0.027447 |
| BP | 099     | tricarboxylic acid cycle                          | 3/245  | 0       | 47       | 47       | 3        |
|    | GO:0010 |                                                   |        | 31/2321 | 0.004198 | 0.035143 | 0.027447 |
| BP | 614     | negative regulation of cardiac muscle hypertrophy | 3/245  | 0       | 47       | 47       | 3        |
|    | GO:0090 |                                                   |        | 31/2321 | 0.004198 | 0.035143 | 0.027447 |
| BP | 075     | relaxation of muscle                              | 3/245  | 0       | 47       | 47       | 3        |
|    | GO:0055 |                                                   |        | 100/232 | 0.004199 | 0.035143 | 0.027447 |
| BP | 013     | cardiac muscle cell development                   | 5/245  | 10      | 68       | 47       | 3        |
|    | GO:2000 |                                                   |        | 101/232 | 0.004381 | 0.036561 | 0.028555 |
| BP | 300     | regulation of synaptic vesicle exocytosis         | 5/245  | 10      | 18       | 86       | 07       |
|    | GO:0006 |                                                   |        | 297/232 | 0.004473 | 0.037233 | 0.029079 |
| BP | 836     | neurotransmitter transport                        | 9/245  | 10      | 91       | 7        | 78       |
|    | GO:0055 |                                                   |        | 193/232 | 0.004528 | 0.037583 | 0.029353 |
| BP | 002     | striated muscle cell development                  | 7/245  | 10      | 33       | 95       | 33       |
|    | GO:0010 |                                                   |        | 102/232 | 0.004568 | 0.037811 | 0.029531 |
| BP | 522     | regulation of calcium ion transport into cytosol  | 5/245  | 10      | 21       | 83       | 31       |
|    | GO:0070 |                                                   |        | 472/232 | 0.004589 | 0.037845 | 0.029557 |
| BP | 838     | divalent metal ion transport                      | 12/245 | 10      | 29       | 12       | 3        |
| BP | GO:0006 | citrate metabolic process                         | 3/245  | 32/2321 | 0.004597 | 0.037845 | 0.029557 |

|    |         |                                                                          |        |         |          |          |          |
|----|---------|--------------------------------------------------------------------------|--------|---------|----------|----------|----------|
|    | 101     |                                                                          |        | 0       | 08       | 12       | 3        |
|    | GO:0031 |                                                                          |        | 355/232 | 0.004661 | 0.038257 | 0.029879 |
| BP | 331     | positive regulation of cellular catabolic process                        | 10/245 | 10      | 37       | 29       | 21       |
|    | GO:0010 |                                                                          |        | 64/2321 | 0.004689 | 0.038257 | 0.029879 |
| BP | 676     | positive regulation of cellular carbohydrate metabolic process           | 4/245  | 0       | 51       | 29       | 21       |
|    | GO:0006 |                                                                          |        | 10/2321 | 0.004722 | 0.038257 | 0.029879 |
| BP | 560     | proline metabolic process                                                | 2/245  | 0       | 5        | 29       | 21       |
|    | GO:0015 |                                                                          |        | 10/2321 | 0.004722 | 0.038257 | 0.029879 |
| BP | 937     | coenzyme A biosynthetic process                                          | 2/245  | 0       | 5        | 29       | 21       |
|    | GO:0019 |                                                                          |        | 10/2321 | 0.004722 | 0.038257 | 0.029879 |
| BP | 374     | galactolipid metabolic process                                           | 2/245  | 0       | 5        | 29       | 21       |
|    | GO:0035 |                                                                          |        | 10/2321 | 0.004722 | 0.038257 | 0.029879 |
| BP | 811     | negative regulation of urine volume                                      | 2/245  | 0       | 5        | 29       | 21       |
|    | GO:0017 |                                                                          |        | 103/232 | 0.004760 | 0.038363 | 0.029962 |
| BP | 015     | regulation of transforming growth factor beta receptor signaling pathway | 5/245  | 10      | 84       | 82       | 41       |
|    | GO:0140 |                                                                          |        | 103/232 | 0.004760 | 0.038363 | 0.029962 |
| BP | 053     | mitochondrial gene expression                                            | 5/245  | 10      | 84       | 82       | 41       |
|    | GO:0015 |                                                                          |        | 415/232 | 0.004821 | 0.038652 | 0.030187 |
| BP | 711     | organic anion transport                                                  | 11/245 | 10      | 79       | 43       | 82       |
|    | GO:0072 |                                                                          |        | 475/232 | 0.004822 | 0.038652 | 0.030187 |
| BP | 511     | divalent inorganic cation transport                                      | 12/245 | 10      | 04       | 43       | 82       |
|    | GO:0009 |                                                                          |        | 65/2321 | 0.004956 | 0.039624 | 0.030947 |
| BP | 064     | glutamine family amino acid metabolic process                            | 4/245  | 0       | 34       | 68       | 15       |
|    | GO:0010 |                                                                          |        | 33/2321 | 0.005017 | 0.039699 | 0.031005 |
| BP | 667     | negative regulation of cardiac muscle cell apoptotic process             | 3/245  | 0       | 81       | 39       | 5        |
| BP | GO:0014 | negative regulation of muscle hypertrophy                                | 3/245  | 33/2321 | 0.005017 | 0.039699 | 0.031005 |

|    |         |                                                                             |        |         |          |          |          |
|----|---------|-----------------------------------------------------------------------------|--------|---------|----------|----------|----------|
|    | 741     |                                                                             |        | 0       | 81       | 39       | 5        |
|    | GO:0021 |                                                                             |        | 33/2321 | 0.005017 | 0.039699 | 0.031005 |
| BP | 680     | cerebellar Purkinje cell layer development                                  | 3/245  | 0       | 81       | 39       | 5        |
|    | GO:1903 |                                                                             |        | 33/2321 | 0.005017 | 0.039699 | 0.031005 |
| BP | 205     | regulation of hydrogen peroxide-induced cell death                          | 3/245  | 0       | 81       | 39       | 5        |
|    | GO:0043 |                                                                             |        | 105/232 | 0.005163 | 0.040639 | 0.031739 |
| BP | 266     | regulation of potassium ion transport                                       | 5/245  | 10      | 31       | 37       | 63       |
|    | GO:1903 |                                                                             |        | 105/232 | 0.005163 | 0.040639 | 0.031739 |
| BP | 844     | regulation of cellular response to transforming growth factor beta stimulus | 5/245  | 10      | 31       | 37       | 63       |
|    | GO:0071 |                                                                             |        | 150/232 | 0.005268 | 0.041359 | 0.032302 |
| BP | 322     | cellular response to carbohydrate stimulus                                  | 6/245  | 10      | 41       | 76       | 26       |
|    | GO:0055 |                                                                             |        | 106/232 | 0.005373 | 0.041966 | 0.032776 |
| BP | 006     | cardiac cell development                                                    | 5/245  | 10      | 32       | 97       | 5        |
|    | GO:1902 |                                                                             |        | 106/232 | 0.005373 | 0.041966 | 0.032776 |
| BP | 803     | regulation of synaptic vesicle transport                                    | 5/245  | 10      | 32       | 97       | 5        |
|    | GO:0002 |                                                                             |        | 34/2321 | 0.005461 | 0.042434 | 0.033141 |
| BP | 931     | response to ischemia                                                        | 3/245  | 0       | 02       | 36       | 53       |
|    | GO:0071 |                                                                             |        | 34/2321 | 0.005461 | 0.042434 | 0.033141 |
| BP | 634     | regulation of transforming growth factor beta production                    | 3/245  | 0       | 02       | 36       | 53       |
|    | GO:0019 |                                                                             |        | 483/232 | 0.005489 | 0.042544 | 0.033227 |
| BP | 439     | aromatic compound catabolic process                                         | 12/245 | 10      | 12       | 17       | 29       |
|    | GO:0006 |                                                                             |        | 67/2321 | 0.005520 | 0.042676 | 0.033330 |
| BP | 940     | regulation of smooth muscle contraction                                     | 4/245  | 0       | 14       | 04       | 29       |
|    | GO:0003 |                                                                             |        | 107/232 | 0.005589 | 0.043101 | 0.033662 |
| BP | 014     | renal system process                                                        | 5/245  | 10      | 29       | 23       | 36       |
| BP | GO:0007 | muscle organ development                                                    | 11/245 | 424/232 | 0.005641 | 0.043391 | 0.033888 |

|    |         |                                                                          |        |         |          |          |          |
|----|---------|--------------------------------------------------------------------------|--------|---------|----------|----------|----------|
|    | 517     |                                                                          |        | 10      | 13       | 15       | 79       |
|    | GO:0006 |                                                                          |        | 11/2321 | 0.005731 | 0.043590 | 0.034044 |
| BP | 002     | fructose 6-phosphate metabolic process                                   | 2/245  | 0       | 93       | 2        | 25       |
|    | GO:0016 |                                                                          |        | 11/2321 | 0.005731 | 0.043590 | 0.034044 |
| BP | 188     | synaptic vesicle maturation                                              | 2/245  | 0       | 93       | 2        | 25       |
|    | GO:0071 |                                                                          |        | 11/2321 | 0.005731 | 0.043590 | 0.034044 |
| BP | 415     | cellular response to purine-containing compound                          | 2/245  | 0       | 93       | 2        | 25       |
|    | GO:1902 | regulation of calcium ion transmembrane transport via high voltage-gated |        | 11/2321 | 0.005731 | 0.043590 | 0.034044 |
| BP | 514     | calcium channel                                                          | 2/245  | 0       | 93       | 2        | 25       |
|    | GO:0034 |                                                                          |        | 425/232 | 0.005738 | 0.043590 | 0.034044 |
| BP | 655     | nucleobase-containing compound catabolic process                         | 11/245 | 10      | 57       | 2        | 25       |
|    | GO:0019 |                                                                          |        | 35/2321 | 0.005927 | 0.044249 | 0.034558 |
| BP | 432     | triglyceride biosynthetic process                                        | 3/245  | 0       | 01       | 2        | 94       |
|    | GO:0034 |                                                                          |        | 35/2321 | 0.005927 | 0.044249 | 0.034558 |
| BP | 381     | plasma lipoprotein particle clearance                                    | 3/245  | 0       | 01       | 2        | 94       |
|    | GO:0046 |                                                                          |        | 35/2321 | 0.005927 | 0.044249 | 0.034558 |
| BP | 461     | neutral lipid catabolic process                                          | 3/245  | 0       | 01       | 2        | 94       |
|    | GO:0046 |                                                                          |        | 35/2321 | 0.005927 | 0.044249 | 0.034558 |
| BP | 464     | acylglycerol catabolic process                                           | 3/245  | 0       | 01       | 2        | 94       |
|    | GO:0051 |                                                                          |        | 35/2321 | 0.005927 | 0.044249 | 0.034558 |
| BP | 084     | 'de novo' posttranslational protein folding                              | 3/245  | 0       | 01       | 2        | 94       |
|    | GO:0070 |                                                                          |        | 35/2321 | 0.005927 | 0.044249 | 0.034558 |
| BP | 873     | regulation of glycogen metabolic process                                 | 3/245  | 0       | 01       | 2        | 94       |
|    | GO:2001 |                                                                          |        | 35/2321 | 0.005927 | 0.044249 | 0.034558 |
| BP | 038     | regulation of cellular response to drug                                  | 3/245  | 0       | 01       | 2        | 94       |
| BP | GO:0071 | cellular response to transforming growth factor beta stimulus            | 7/245  | 204/232 | 0.006096 | 0.045402 | 0.035459 |



|    |         |                                                                               |        |         |          |          |          |
|----|---------|-------------------------------------------------------------------------------|--------|---------|----------|----------|----------|
|    | 560     |                                                                               |        | 10      | 43       | 72       | 84       |
|    | GO:0007 |                                                                               |        | 69/2321 | 0.006125 | 0.045506 | 0.035540 |
| BP | 492     | endoderm development                                                          | 4/245  | 0       | 25       | 09       | 58       |
|    | GO:1990 |                                                                               |        | 156/232 | 0.006354 | 0.047094 | 0.036780 |
| BP | 845     | adaptive thermogenesis                                                        | 6/245  | 10      | 46       | 12       | 84       |
|    | GO:0010 |                                                                               |        | 36/2321 | 0.006416 | 0.047110 | 0.036793 |
| BP | 664     | negative regulation of striated muscle cell apoptotic process                 | 3/245  | 0       | 08       | 57       | 68       |
|    | GO:0071 |                                                                               |        | 36/2321 | 0.006416 | 0.047110 | 0.036793 |
| BP | 604     | transforming growth factor beta production                                    | 3/245  | 0       | 08       | 57       | 68       |
|    | GO:1905 |                                                                               |        | 36/2321 | 0.006416 | 0.047110 | 0.036793 |
| BP | 209     | positive regulation of cardiocyte differentiation                             | 3/245  | 0       | 08       | 57       | 68       |
|    | GO:0001 |                                                                               |        | 372/232 | 0.006418 | 0.047110 | 0.036793 |
| BP | 505     | regulation of neurotransmitter levels                                         | 10/245 | 10      | 54       | 57       | 68       |
|    | GO:0060 |                                                                               |        | 157/232 | 0.006550 | 0.047961 | 0.037457 |
| BP | 402     | calcium ion transport into cytosol                                            | 6/245  | 10      | 16       | 03       | 9        |
|    | GO:0071 |                                                                               |        | 208/232 | 0.006756 | 0.048386 | 0.037790 |
| BP | 559     | response to transforming growth factor beta                                   | 7/245  | 10      | 78       | 58       | 26       |
|    | GO:0001 |                                                                               |        | 112/232 | 0.006761 | 0.048386 | 0.037790 |
| BP | 892     | embryonic placenta development                                                | 5/245  | 10      | 77       | 58       | 26       |
|    | GO:0006 |                                                                               |        | 112/232 | 0.006761 | 0.048386 | 0.037790 |
| BP | 939     | smooth muscle contraction                                                     | 5/245  | 10      | 77       | 58       | 26       |
|    | GO:0010 |                                                                               |        | 71/2321 | 0.006772 | 0.048386 | 0.037790 |
| BP | 611     | regulation of cardiac muscle hypertrophy                                      | 4/245  | 0       | 9        | 58       | 26       |
|    | GO:0000 |                                                                               |        | 12/2321 | 0.006830 | 0.048386 | 0.037790 |
| BP | 083     | regulation of transcription involved in G1/S transition of mitotic cell cycle | 2/245  | 0       | 67       | 58       | 26       |
| BP | GO:0003 | renal water homeostasis                                                       | 2/245  | 12/2321 | 0.006830 | 0.048386 | 0.037790 |

|    |         |                                                                            |       |         |          |          |          |
|----|---------|----------------------------------------------------------------------------|-------|---------|----------|----------|----------|
|    | 091     |                                                                            |       | 0       | 67       | 58       | 26       |
|    | GO:0006 |                                                                            |       | 12/2321 | 0.006830 | 0.048386 | 0.037790 |
| BP | 086     | acetyl-CoA biosynthetic process from pyruvate                              | 2/245 | 0       | 67       | 58       | 26       |
|    | GO:0006 |                                                                            |       | 12/2321 | 0.006830 | 0.048386 | 0.037790 |
| BP | 654     | phosphatidic acid biosynthetic process                                     | 2/245 | 0       | 67       | 58       | 26       |
|    | GO:0009 |                                                                            |       | 12/2321 | 0.006830 | 0.048386 | 0.037790 |
| BP | 068     | aspartate family amino acid catabolic process                              | 2/245 | 0       | 67       | 58       | 26       |
|    | GO:0030 |                                                                            |       | 12/2321 | 0.006830 | 0.048386 | 0.037790 |
| BP | 388     | fructose 1,6-bisphosphate metabolic process                                | 2/245 | 0       | 67       | 58       | 26       |
|    | GO:0043 |                                                                            |       | 12/2321 | 0.006830 | 0.048386 | 0.037790 |
| BP | 471     | regulation of cellular carbohydrate catabolic process                      | 2/245 | 0       | 67       | 58       | 26       |
|    | GO:0045 |                                                                            |       | 12/2321 | 0.006830 | 0.048386 | 0.037790 |
| BP | 717     | negative regulation of fatty acid biosynthetic process                     | 2/245 | 0       | 67       | 58       | 26       |
|    | GO:0061 |                                                                            |       | 12/2321 | 0.006830 | 0.048386 | 0.037790 |
| BP | 577     | calcium ion transmembrane transport via high voltage-gated calcium channel | 2/245 | 0       | 67       | 58       | 26       |
|    | GO:1901 |                                                                            |       | 12/2321 | 0.006830 | 0.048386 | 0.037790 |
| BP | 298     | regulation of hydrogen peroxide-mediated programmed cell death             | 2/245 | 0       | 67       | 58       | 26       |
|    | GO:0032 |                                                                            |       | 37/2321 | 0.006928 | 0.048739 | 0.038065 |
| BP | 885     | regulation of polysaccharide biosynthetic process                          | 3/245 | 0       | 51       | 61       | 97       |
|    | GO:0036 |                                                                            |       | 37/2321 | 0.006928 | 0.048739 | 0.038065 |
| BP | 474     | cell death in response to hydrogen peroxide                                | 3/245 | 0       | 51       | 61       | 97       |
|    | GO:0072 |                                                                            |       | 37/2321 | 0.006928 | 0.048739 | 0.038065 |
| BP | 350     | tricarboxylic acid metabolic process                                       | 3/245 | 0       | 51       | 61       | 97       |
|    | GO:0001 |                                                                            |       | 159/232 | 0.006954 | 0.048810 | 0.038121 |
| BP | 678     | cellular glucose homeostasis                                               | 6/245 | 10      | 64       | 69       | 49       |
| BP | GO:0051 | protein heterooligomerization                                              | 6/245 | 160/232 | 0.007163 | 0.050161 | 0.039176 |

|    |         |                                                                           |        |         |          |          |          |
|----|---------|---------------------------------------------------------------------------|--------|---------|----------|----------|----------|
|    | 291     |                                                                           |        | 10      | 53       | 17       | 23       |
|    | GO:0060 |                                                                           |        | 114/232 | 0.007275 | 0.050829 | 0.039697 |
| BP | 419     | heart growth                                                              | 5/245  | 10      | 6        | 05       | 84       |
|    | GO:0042 |                                                                           |        | 265/232 | 0.007356 | 0.051274 | 0.040045 |
| BP | 593     | glucose homeostasis                                                       | 8/245  | 10      | 15       | 21       | 52       |
|    | GO:0035 |                                                                           |        | 380/232 | 0.007405 | 0.051325 | 0.040085 |
| BP | 690     | cellular response to drug                                                 | 10/245 | 10      | 91       | 23       | 36       |
|    | GO:0006 |                                                                           |        | 73/2321 | 0.007464 | 0.051325 | 0.040085 |
| BP | 094     | gluconeogenesis                                                           | 4/245  | 0       | 33       | 23       | 36       |
|    | GO:0060 |                                                                           |        | 73/2321 | 0.007464 | 0.051325 | 0.040085 |
| BP | 191     | regulation of lipase activity                                             | 4/245  | 0       | 33       | 23       | 36       |
|    | GO:1990 |                                                                           |        | 73/2321 | 0.007464 | 0.051325 | 0.040085 |
| BP | 542     | mitochondrial transmembrane transport                                     | 4/245  | 0       | 33       | 23       | 36       |
|    | GO:0046 |                                                                           |        | 38/2321 | 0.007464 | 0.051325 | 0.040085 |
| BP | 460     | neutral lipid biosynthetic process                                        | 3/245  | 0       | 57       | 23       | 36       |
|    | GO:0046 |                                                                           |        | 38/2321 | 0.007464 | 0.051325 | 0.040085 |
| BP | 463     | acylglycerol biosynthetic process                                         | 3/245  | 0       | 57       | 23       | 36       |
|    | GO:0033 |                                                                           |        | 266/232 | 0.007517 | 0.051570 | 0.040277 |
| BP | 500     | carbohydrate homeostasis                                                  | 8/245  | 10      | 22       | 86       | 21       |
|    | GO:0007 |                                                                           |        | 74/2321 | 0.007826 | 0.053334 | 0.041654 |
| BP | 193     | adenylate cyclase-inhibiting G protein-coupled receptor signaling pathway | 4/245  | 0       | 83       | 51       | 63       |
|    | GO:0014 |                                                                           |        | 74/2321 | 0.007826 | 0.053334 | 0.041654 |
| BP | 743     | regulation of muscle hypertrophy                                          | 4/245  | 0       | 83       | 51       | 63       |
|    | GO:1903 |                                                                           |        | 74/2321 | 0.007826 | 0.053334 | 0.041654 |
| BP | 201     | regulation of oxidative stress-induced cell death                         | 4/245  | 0       | 83       | 51       | 63       |
| BP | GO:0015 | basic amino acid transport                                                | 2/245  | 13/2321 | 0.008016 | 0.053957 | 0.042140 |

|    |         |                                                            |       |         |          |          |          |
|----|---------|------------------------------------------------------------|-------|---------|----------|----------|----------|
|    | 802     |                                                            |       | 0       | 74       | 21       | 96       |
|    | GO:0034 |                                                            |       | 13/2321 | 0.008016 | 0.053957 | 0.042140 |
| BP | 982     | mitochondrial protein processing                           | 2/245 | 0       | 74       | 21       | 96       |
|    | GO:0050 |                                                            |       | 13/2321 | 0.008016 | 0.053957 | 0.042140 |
| BP | 746     | regulation of lipoprotein metabolic process                | 2/245 | 0       | 74       | 21       | 96       |
|    | GO:0071 |                                                            |       | 13/2321 | 0.008016 | 0.053957 | 0.042140 |
| BP | 380     | cellular response to prostaglandin E stimulus              | 2/245 | 0       | 74       | 21       | 96       |
|    | GO:0097 |                                                            |       | 39/2321 | 0.008024 | 0.053957 | 0.042140 |
| BP | 009     | energy homeostasis                                         | 3/245 | 0       | 5        | 21       | 96       |
|    | GO:2001 |                                                            |       | 39/2321 | 0.008024 | 0.053957 | 0.042140 |
| BP | 024     | negative regulation of response to drug                    | 3/245 | 0       | 5        | 21       | 96       |
|    | GO:0007 |                                                            |       | 165/232 | 0.008276 | 0.055529 | 0.043368 |
| BP | 179     | transforming growth factor beta receptor signaling pathway | 6/245 | 10      | 57       | 58       | 99       |
|    | GO:0019 |                                                            |       | 76/2321 | 0.008586 | 0.057479 | 0.044892 |
| BP | 319     | hexose biosynthetic process                                | 4/245 | 0       | 11       | 79       | 12       |
|    | GO:0042 |                                                            |       | 40/2321 | 0.008608 | 0.057503 | 0.044910 |
| BP | 398     | cellular modified amino acid biosynthetic process          | 3/245 | 0       | 53       | 45       | 6        |
|    | GO:0003 |                                                            |       | 41/2321 | 0.009216 | 0.059940 | 0.046813 |
| BP | 298     | physiological muscle hypertrophy                           | 3/245 | 0       | 87       | 34       | 83       |
|    | GO:0003 |                                                            |       | 41/2321 | 0.009216 | 0.059940 | 0.046813 |
| BP | 301     | physiological cardiac muscle hypertrophy                   | 3/245 | 0       | 87       | 34       | 83       |
|    | GO:0006 |                                                            |       | 41/2321 | 0.009216 | 0.059940 | 0.046813 |
| BP | 418     | tRNA aminoacylation for protein translation                | 3/245 | 0       | 87       | 34       | 83       |
|    | GO:0009 |                                                            |       | 41/2321 | 0.009216 | 0.059940 | 0.046813 |
| BP | 066     | aspartate family amino acid metabolic process              | 3/245 | 0       | 87       | 34       | 83       |
| BP | GO:0061 | cell growth involved in cardiac muscle cell development    | 3/245 | 41/2321 | 0.009216 | 0.059940 | 0.046813 |

|    |         |                                                               |       |         |          |          |          |
|----|---------|---------------------------------------------------------------|-------|---------|----------|----------|----------|
|    | 049     |                                                               |       | 0       | 87       | 34       | 83       |
|    | GO:0036 |                                                               |       | 121/232 | 0.009288 | 0.059940 | 0.046813 |
| BP | 294     | cellular response to decreased oxygen levels                  | 5/245 | 10      | 1        | 34       | 83       |
|    | GO:0010 |                                                               |       | 14/2321 | 0.009288 | 0.059940 | 0.046813 |
| BP | 421     | hydrogen peroxide-mediated programmed cell death              | 2/245 | 0       | 19       | 34       | 83       |
|    | GO:0010 |                                                               |       | 14/2321 | 0.009288 | 0.059940 | 0.046813 |
| BP | 896     | regulation of triglyceride catabolic process                  | 2/245 | 0       | 19       | 34       | 83       |
|    | GO:0015 |                                                               |       | 14/2321 | 0.009288 | 0.059940 | 0.046813 |
| BP | 936     | coenzyme A metabolic process                                  | 2/245 | 0       | 19       | 34       | 83       |
|    | GO:0043 |                                                               |       | 14/2321 | 0.009288 | 0.059940 | 0.046813 |
| BP | 650     | dicarboxylic acid biosynthetic process                        | 2/245 | 0       | 19       | 34       | 83       |
|    | GO:0046 |                                                               |       | 14/2321 | 0.009288 | 0.059940 | 0.046813 |
| BP | 473     | phosphatidic acid metabolic process                           | 2/245 | 0       | 19       | 34       | 83       |
|    | GO:0086 |                                                               |       | 14/2321 | 0.009288 | 0.059940 | 0.046813 |
| BP | 069     | bundle of His cell to Purkinje myocyte communication          | 2/245 | 0       | 19       | 34       | 83       |
|    | GO:0090 |                                                               |       | 14/2321 | 0.009288 | 0.059940 | 0.046813 |
| BP | 136     | epithelial cell-cell adhesion                                 | 2/245 | 0       | 19       | 34       | 83       |
|    | GO:0097 |                                                               |       | 14/2321 | 0.009288 | 0.059940 | 0.046813 |
| BP | 468     | programmed cell death in response to reactive oxygen species  | 2/245 | 0       | 19       | 34       | 83       |
|    | GO:1901 |                                                               |       | 14/2321 | 0.009288 | 0.059940 | 0.046813 |
| BP | 387     | positive regulation of voltage-gated calcium channel activity | 2/245 | 0       | 19       | 34       | 83       |
|    | GO:1901 |                                                               |       | 14/2321 | 0.009288 | 0.059940 | 0.046813 |
| BP | 841     | regulation of high voltage-gated calcium channel activity     | 2/245 | 0       | 19       | 34       | 83       |
|    | GO:0006 |                                                               |       | 122/232 | 0.009603 | 0.061846 | 0.048302 |
| BP | 639     | acylglycerol metabolic process                                | 5/245 | 10      | 88       | 54       | 58       |
| BP | GO:0051 | regulation of release of sequestered calcium ion into cytosol | 4/245 | 79/2321 | 0.009812 | 0.063058 | 0.049249 |

|    |         |                                                                       |        |         |          |          |          |
|----|---------|-----------------------------------------------------------------------|--------|---------|----------|----------|----------|
|    | 279     |                                                                       |        | 0       | 81       | 67       | 26       |
|    | GO:0006 |                                                                       |        | 225/232 |          | 0.065073 | 0.050822 |
| BP | 650     | glycerophospholipid metabolic process                                 | 7/245  | 10      | 0.010169 | 03       | 49       |
|    | GO:0032 |                                                                       |        | 225/232 |          | 0.065073 | 0.050822 |
| BP | 868     | response to insulin                                                   | 7/245  | 10      | 0.010169 | 03       | 49       |
|    | GO:0006 |                                                                       |        | 124/232 | 0.010257 | 0.065501 | 0.051157 |
| BP | 638     | neutral lipid metabolic process                                       | 5/245  | 10      | 46       | 49       | 12       |
|    | GO:0006 |                                                                       |        | 400/232 | 0.010389 | 0.066205 | 0.051706 |
| BP | 979     | response to oxidative stress                                          | 10/245 | 10      | 44       | 51       | 96       |
|    | GO:0008 |                                                                       |        | 43/2321 | 0.010507 | 0.066400 | 0.051859 |
| BP | 631     | intrinsic apoptotic signaling pathway in response to oxidative stress | 3/245  | 0       | 31       | 94       | 6        |
|    | GO:0010 |                                                                       |        | 43/2321 | 0.010507 | 0.066400 | 0.051859 |
| BP | 907     | positive regulation of glucose metabolic process                      | 3/245  | 0       | 31       | 94       | 6        |
|    | GO:1901 |                                                                       |        | 43/2321 | 0.010507 | 0.066400 | 0.051859 |
| BP | 031     | regulation of response to reactive oxygen species                     | 3/245  | 0       | 31       | 94       | 6        |
|    | GO:1990 |                                                                       |        | 43/2321 | 0.010507 | 0.066400 | 0.051859 |
| BP | 573     | potassium ion import across plasma membrane                           | 3/245  | 0       | 31       | 94       | 6        |
|    | GO:0009 |                                                                       |        | 401/232 | 0.010559 | 0.066592 | 0.052009 |
| BP | 991     | response to extracellular stimulus                                    | 10/245 | 10      | 56       | 98       | 59       |
|    | GO:0021 |                                                                       |        | 15/2321 | 0.010643 | 0.066705 | 0.052097 |
| BP | 694     | cerebellar Purkinje cell layer formation                              | 2/245  | 0       | 1        | 55       | 5        |
|    | GO:0039 |                                                                       |        | 15/2321 | 0.010643 | 0.066705 | 0.052097 |
| BP | 535     | regulation of RIG-I signaling pathway                                 | 2/245  | 0       | 1        | 55       | 5        |
|    | GO:1902 |                                                                       |        | 15/2321 | 0.010643 | 0.066705 | 0.052097 |
| BP | 894     | negative regulation of pri-miRNA transcription by RNA polymerase II   | 2/245  | 0       | 1        | 55       | 5        |
| BP | GO:0022 | respiratory electron transport chain                                  | 4/245  | 81/2321 | 0.010690 | 0.066865 | 0.052222 |

|    |         |                                                            |       |         |          |          |          |
|----|---------|------------------------------------------------------------|-------|---------|----------|----------|----------|
|    | 904     |                                                            |       | 0       | 65       | 93       | 76       |
|    | GO:0046 |                                                            |       | 82/2321 | 0.011147 | 0.069348 | 0.054161 |
| BP | 364     | monosaccharide biosynthetic process                        | 4/245 | 0       | 95       | 41       | 59       |
|    | GO:0051 |                                                            |       | 82/2321 | 0.011147 | 0.069348 | 0.054161 |
| BP | 899     | membrane depolarization                                    | 4/245 | 0       | 95       | 41       | 59       |
|    | GO:0032 |                                                            |       | 44/2321 | 0.011189 | 0.069348 | 0.054161 |
| BP | 881     | regulation of polysaccharide metabolic process             | 3/245 | 0       | 75       | 41       | 59       |
|    | GO:0043 |                                                            |       | 44/2321 | 0.011189 | 0.069348 | 0.054161 |
| BP | 039     | tRNA aminoacylation                                        | 3/245 | 0       | 75       | 41       | 59       |
|    | GO:0009 |                                                            |       | 344/232 | 0.011201 | 0.069348 | 0.054161 |
| BP | 636     | response to toxic substance                                | 9/245 | 10      | 38       | 41       | 59       |
|    | GO:0051 |                                                            |       | 127/232 |          | 0.069779 | 0.054498 |
| BP | 592     | response to calcium ion                                    | 5/245 | 10      | 0.011294 | 99       | 66       |
|    | GO:0051 |                                                            |       | 178/232 | 0.011744 | 0.072409 | 0.056552 |
| BP | 588     | regulation of neurotransmitter transport                   | 6/245 | 10      | 36       | 51       | 34       |
|    | GO:0043 |                                                            |       | 45/2321 | 0.011897 | 0.072409 | 0.056552 |
| BP | 038     | amino acid activation                                      | 3/245 | 0       | 21       | 51       | 34       |
|    | GO:0060 |                                                            |       | 45/2321 | 0.011897 | 0.072409 | 0.056552 |
| BP | 421     | positive regulation of heart growth                        | 3/245 | 0       | 21       | 51       | 34       |
|    | GO:1902 |                                                            |       | 45/2321 | 0.011897 | 0.072409 | 0.056552 |
| BP | 893     | regulation of pri-miRNA transcription by RNA polymerase II | 3/245 | 0       | 21       | 51       | 34       |
|    | GO:0006 |                                                            |       | 348/232 | 0.012007 | 0.072409 | 0.056552 |
| BP | 644     | phospholipid metabolic process                             | 9/245 | 10      | 89       | 51       | 34       |
|    | GO:0014 |                                                            |       | 16/2321 | 0.012079 | 0.072409 | 0.056552 |
| BP | 733     | regulation of skeletal muscle adaptation                   | 2/245 | 0       | 59       | 51       | 34       |
| BP | GO:0031 | response to caffeine                                       | 2/245 | 16/2321 | 0.012079 | 0.072409 | 0.056552 |

|    |         |                                                                                |       |         |          |          |          |
|----|---------|--------------------------------------------------------------------------------|-------|---------|----------|----------|----------|
|    | 000     |                                                                                |       | 0       | 59       | 51       | 34       |
|    | GO:0036 |                                                                                |       | 16/2321 | 0.012079 | 0.072409 | 0.056552 |
| BP | 270     | response to diuretic                                                           | 2/245 | 0       | 59       | 51       | 34       |
|    | GO:0043 |                                                                                |       | 16/2321 | 0.012079 | 0.072409 | 0.056552 |
| BP | 084     | penile erection                                                                | 2/245 | 0       | 59       | 51       | 34       |
|    | GO:0060 |                                                                                |       | 16/2321 | 0.012079 | 0.072409 | 0.056552 |
| BP | 192     | negative regulation of lipase activity                                         | 2/245 | 0       | 59       | 51       | 34       |
|    | GO:0070 |                                                                                |       | 16/2321 | 0.012079 | 0.072409 | 0.056552 |
| BP | 885     | negative regulation of calcineurin-NFAT signaling cascade                      | 2/245 | 0       | 59       | 51       | 34       |
|    | GO:0071 |                                                                                |       | 16/2321 | 0.012079 | 0.072409 | 0.056552 |
| BP | 379     | cellular response to prostaglandin stimulus                                    | 2/245 | 0       | 59       | 51       | 34       |
|    | GO:0106 |                                                                                |       | 16/2321 | 0.012079 | 0.072409 | 0.056552 |
| BP | 057     | negative regulation of calcineurin-mediated signaling                          | 2/245 | 0       | 59       | 51       | 34       |
|    | GO:0045 |                                                                                |       | 84/2321 | 0.012099 | 0.072409 | 0.056552 |
| BP | 844     | positive regulation of striated muscle tissue development                      | 4/245 | 0       | 95       | 51       | 34       |
|    | GO:0048 |                                                                                |       | 84/2321 | 0.012099 | 0.072409 | 0.056552 |
| BP | 636     | positive regulation of muscle organ development                                | 4/245 | 0       | 95       | 51       | 34       |
|    | GO:0060 |                                                                                |       | 84/2321 | 0.012099 | 0.072409 | 0.056552 |
| BP | 420     | regulation of heart growth                                                     | 4/245 | 0       | 95       | 51       | 34       |
|    | GO:0090 | regulation of transmembrane receptor protein serine/threonine kinase signaling |       | 233/232 | 0.012149 | 0.072560 | 0.056670 |
| BP | 092     | pathway                                                                        | 7/245 | 10      | 02       | 61       | 34       |
|    | GO:0022 |                                                                                |       | 85/2321 | 0.012594 | 0.074493 | 0.058179 |
| BP | 900     | electron transport chain                                                       | 4/245 | 0       | 86       | 11       | 64       |
|    | GO:0098 |                                                                                |       | 85/2321 | 0.012594 | 0.074493 | 0.058179 |
| BP | 659     | inorganic cation import across plasma membrane                                 | 4/245 | 0       | 86       | 11       | 64       |
| BP | GO:0099 | inorganic ion import across plasma membrane                                    | 4/245 | 85/2321 | 0.012594 | 0.074493 | 0.058179 |



|    |         |                                                                                       |       |         |          |          |          |
|----|---------|---------------------------------------------------------------------------------------|-------|---------|----------|----------|----------|
|    | 587     |                                                                                       |       | 0       | 86       | 11       | 64       |
|    | GO:1900 |                                                                                       |       | 85/2321 | 0.012594 | 0.074493 | 0.058179 |
| BP | 407     | regulation of cellular response to oxidative stress                                   | 4/245 | 0       | 86       | 11       | 64       |
|    | GO:1901 |                                                                                       |       | 85/2321 | 0.012594 | 0.074493 | 0.058179 |
| BP | 863     | positive regulation of muscle tissue development                                      | 4/245 | 0       | 86       | 11       | 64       |
|    | GO:0098 |                                                                                       |       | 181/232 | 0.012670 | 0.074797 | 0.058417 |
| BP | 656     | anion transmembrane transport                                                         | 6/245 | 10      | 92       | 73       | 55       |
|    | GO:0015 |                                                                                       |       | 86/2321 | 0.013102 |          | 0.060290 |
| BP | 908     | fatty acid transport                                                                  | 4/245 | 0       | 54       | 0.077196 | 62       |
|    | GO:0016 |                                                                                       |       | 133/232 | 0.013576 | 0.079031 | 0.061724 |
| BP | 999     | antibiotic metabolic process                                                          | 5/245 | 10      | 75       | 95       | 51       |
|    | GO:0046 |                                                                                       |       | 133/232 | 0.013576 | 0.079031 | 0.061724 |
| BP | 928     | regulation of neurotransmitter secretion                                              | 5/245 | 10      | 75       | 95       | 51       |
|    | GO:0006 |                                                                                       |       | 17/2321 | 0.013595 | 0.079031 | 0.061724 |
| BP | 677     | glycosylceramide metabolic process                                                    | 2/245 | 0       | 78       | 95       | 51       |
|    | GO:0010 |                                                                                       |       | 17/2321 | 0.013595 | 0.079031 | 0.061724 |
| BP | 888     | negative regulation of lipid storage                                                  | 2/245 | 0       | 78       | 95       | 51       |
|    | GO:0015 |                                                                                       |       | 17/2321 | 0.013595 | 0.079031 | 0.061724 |
| BP | 701     | bicarbonate transport                                                                 | 2/245 | 0       | 78       | 95       | 51       |
|    | GO:0040 |                                                                                       |       | 17/2321 | 0.013595 | 0.079031 | 0.061724 |
| BP | 015     | negative regulation of multicellular organism growth                                  | 2/245 | 0       | 78       | 95       | 51       |
|    | GO:1902 | negative regulation of oxidative stress-induced intrinsic apoptotic signaling pathway |       | 17/2321 | 0.013595 | 0.079031 | 0.061724 |
| BP | 176     |                                                                                       | 2/245 | 0       | 78       | 95       | 51       |
|    | GO:0009 |                                                                                       |       | 184/232 | 0.013647 | 0.079182 | 0.061842 |
| BP | 746     | response to hexose                                                                    | 6/245 | 10      | 66       | 44       | 04       |
| BP | GO:0034 | response to monosaccharide                                                            | 6/245 | 185/232 | 0.013984 | 0.080983 | 0.063248 |

|    |         |                                                   |        |         |          |          |          |
|----|---------|---------------------------------------------------|--------|---------|----------|----------|----------|
|    | 284     |                                                   |        | 10      | 62       | 15       | 41       |
|    | GO:1903 |                                                   |        | 88/2321 | 0.014156 | 0.081752 | 0.063849 |
| BP | 035     | negative regulation of response to wounding       | 4/245  | 0       | 6        | 48       | 26       |
|    | GO:2000 |                                                   |        | 48/2321 | 0.014171 | 0.081752 | 0.063849 |
| BP | 725     | regulation of cardiac muscle cell differentiation | 3/245  | 0       | 15       | 48       | 26       |
|    | GO:1903 |                                                   |        | 186/232 | 0.014327 | 0.082497 | 0.064430 |
| BP | 305     | regulation of regulated secretory pathway         | 6/245  | 10      | 33       | 28       | 95       |
|    | GO:0071 |                                                   |        | 135/232 | 0.014401 | 0.082770 |          |
| BP | 453     | cellular response to oxygen levels                | 5/245  | 10      | 88       | 06       | 0.064644 |
|    | GO:0009 |                                                   |        | 422/232 | 0.014645 | 0.084009 | 0.065611 |
| BP | 896     | positive regulation of catabolic process          | 10/245 | 10      | 04       | 03       | 64       |
|    | GO:0070 |                                                   |        | 89/2321 | 0.014703 | 0.084184 | 0.065748 |
| BP | 301     | cellular response to hydrogen peroxide            | 4/245  | 0       | 18       | 01       | 3        |
|    | GO:0017 |                                                   |        | 136/232 | 0.014826 | 0.084573 | 0.066052 |
| BP | 158     | regulation of calcium ion-dependent exocytosis    | 5/245  | 10      | 8        | 85       | 77       |
|    | GO:0097 |                                                   |        | 136/232 | 0.014826 | 0.084573 | 0.066052 |
| BP | 553     | calcium ion transmembrane import into cytosol     | 5/245  | 10      | 8        | 85       | 77       |
|    | GO:0008 |                                                   |        | 301/232 | 0.015009 | 0.084992 | 0.066379 |
| BP | 202     | steroid metabolic process                         | 8/245  | 10      | 78       | 53       | 76       |
|    | GO:0001 |                                                   |        | 18/2321 | 0.015189 | 0.084992 | 0.066379 |
| BP | 833     | inner cell mass cell proliferation                | 2/245  | 0       | 86       | 53       | 76       |
|    | GO:0010 |                                                   |        | 18/2321 | 0.015189 | 0.084992 | 0.066379 |
| BP | 002     | cardioblast differentiation                       | 2/245  | 0       | 86       | 53       | 76       |
|    | GO:0034 |                                                   |        | 18/2321 | 0.015189 | 0.084992 | 0.066379 |
| BP | 389     | lipid droplet organization                        | 2/245  | 0       | 86       | 53       | 76       |
| BP | GO:0034 | response to prostaglandin E                       | 2/245  | 18/2321 | 0.015189 | 0.084992 | 0.066379 |

|    |         |                                                                                |        |         |          |          |          |
|----|---------|--------------------------------------------------------------------------------|--------|---------|----------|----------|----------|
|    | 695     |                                                                                |        | 0       | 86       | 53       | 76       |
|    | GO:0039 |                                                                                |        | 18/2321 | 0.015189 | 0.084992 | 0.066379 |
| BP | 529     | RIG-I signaling pathway                                                        | 2/245  | 0       | 86       | 53       | 76       |
|    | GO:0039 | regulation of viral-induced cytoplasmic pattern recognition receptor signaling |        | 18/2321 | 0.015189 | 0.084992 | 0.066379 |
| BP | 531     | pathway                                                                        | 2/245  | 0       | 86       | 53       | 76       |
|    | GO:0045 |                                                                                |        | 18/2321 | 0.015189 | 0.084992 | 0.066379 |
| BP | 722     | positive regulation of gluconeogenesis                                         | 2/245  | 0       | 86       | 53       | 76       |
|    | GO:0060 |                                                                                |        | 18/2321 | 0.015189 | 0.084992 | 0.066379 |
| BP | 947     | cardiac vascular smooth muscle cell differentiation                            | 2/245  | 0       | 86       | 53       | 76       |
|    | GO:0086 |                                                                                |        | 18/2321 | 0.015189 | 0.084992 | 0.066379 |
| BP | 011     | membrane repolarization during action potential                                | 2/245  | 0       | 86       | 53       | 76       |
|    | GO:0002 |                                                                                |        | 137/232 | 0.015260 | 0.084992 | 0.066379 |
| BP | 221     | pattern recognition receptor signaling pathway                                 | 5/245  | 10      | 04       | 53       | 76       |
|    | GO:0072 |                                                                                |        | 90/2321 | 0.015262 | 0.084992 | 0.066379 |
| BP | 655     | establishment of protein localization to mitochondrion                         | 4/245  | 0       | 94       | 53       | 76       |
|    | GO:1902 |                                                                                |        | 90/2321 | 0.015262 | 0.084992 | 0.066379 |
| BP | 600     | proton transmembrane transport                                                 | 4/245  | 0       | 94       | 53       | 76       |
|    | GO:0007 |                                                                                |        | 138/232 | 0.015701 | 0.087117 | 0.068039 |
| BP | 050     | cell cycle arrest                                                              | 5/245  | 10      | 67       | 11       | 08       |
|    | GO:0016 |                                                                                |        | 138/232 | 0.015701 | 0.087117 | 0.068039 |
| BP | 079     | synaptic vesicle exocytosis                                                    | 5/245  | 10      | 67       | 11       | 08       |
|    | GO:0019 |                                                                                |        | 427/232 | 0.015771 | 0.087345 | 0.068217 |
| BP | 932     | second-messenger-mediated signaling                                            | 10/245 | 10      | 58       | 89       | 75       |
|    | GO:0051 |                                                                                |        | 50/2321 | 0.015814 | 0.087424 | 0.068279 |
| BP | 055     | negative regulation of lipid biosynthetic process                              | 3/245  | 0       | 5        | 62       | 24       |
| BP | GO:0002 | innate immune response-activating signal transduction                          | 5/245  | 139/232 | 0.016151 | 0.089127 | 0.069609 |

|    |         |                                                                               |       |         |          |          |          |
|----|---------|-------------------------------------------------------------------------------|-------|---------|----------|----------|----------|
|    | 758     |                                                                               |       | 10      | 75       | 25       | 01       |
|    | GO:0071 |                                                                               |       | 140/232 | 0.016610 | 0.091492 | 0.071455 |
| BP | 333     | cellular response to glucose stimulus                                         | 5/245 | 10      | 35       | 09       | 96       |
|    | GO:0006 |                                                                               |       | 51/2321 | 0.016674 | 0.091515 | 0.071474 |
| BP | 111     | regulation of gluconeogenesis                                                 | 3/245 | 0       | 67       | 39       | 16       |
|    | GO:2000 |                                                                               |       | 51/2321 | 0.016674 | 0.091515 | 0.071474 |
| BP | 649     | regulation of sodium ion transmembrane transporter activity                   | 3/245 | 0       | 67       | 39       | 16       |
|    | GO:0010 |                                                                               |       | 19/2321 | 0.016860 | 0.091870 | 0.071751 |
| BP | 766     | negative regulation of sodium ion transport                                   | 2/245 | 0       | 02       | 5        | 51       |
|    | GO:0010 | regulation of release of sequestered calcium ion into cytosol by sarcoplasmic |       | 19/2321 | 0.016860 | 0.091870 | 0.071751 |
| BP | 880     | reticulum                                                                     | 2/245 | 0       | 02       | 5        | 51       |
|    | GO:0021 |                                                                               |       | 19/2321 | 0.016860 | 0.091870 | 0.071751 |
| BP | 692     | cerebellar Purkinje cell layer morphogenesis                                  | 2/245 | 0       | 02       | 5        | 51       |
|    | GO:0034 |                                                                               |       | 19/2321 | 0.016860 | 0.091870 | 0.071751 |
| BP | 063     | stress granule assembly                                                       | 2/245 | 0       | 02       | 5        | 51       |
|    | GO:0036 |                                                                               |       | 93/2321 | 0.017022 | 0.092588 | 0.072312 |
| BP | 473     | cell death in response to oxidative stress                                    | 4/245 | 0       | 17       | 47       | 24       |
|    | GO:0000 |                                                                               |       | 194/232 | 0.017282 | 0.093834 | 0.073285 |
| BP | 209     | protein polyubiquitination                                                    | 6/245 | 10      | 11       | 78       | 62       |
|    | GO:0031 |                                                                               |       | 371/232 | 0.017512 | 0.094006 | 0.073419 |
| BP | 667     | response to nutrient levels                                                   | 9/245 | 10      | 24       | 26       | 55       |
|    | GO:0001 |                                                                               |       | 52/2321 | 0.017560 | 0.094006 | 0.073419 |
| BP | 895     | retina homeostasis                                                            | 3/245 | 0       | 59       | 26       | 55       |
|    | GO:0021 |                                                                               |       | 52/2321 | 0.017560 | 0.094006 | 0.073419 |
| BP | 587     | cerebellum morphogenesis                                                      | 3/245 | 0       | 59       | 26       | 55       |
| BP | GO:0046 | pigment biosynthetic process                                                  | 3/245 | 52/2321 | 0.017560 | 0.094006 | 0.073419 |

|    |         |                                                              |        |         |          |          |          |
|----|---------|--------------------------------------------------------------|--------|---------|----------|----------|----------|
|    | 148     |                                                              |        | 0       | 59       | 26       | 55       |
|    | GO:0061 |                                                              |        | 52/2321 | 0.017560 | 0.094006 | 0.073419 |
| BP | 614     | pri-miRNA transcription by RNA polymerase II                 | 3/245  | 0       | 59       | 26       | 55       |
|    | GO:1900 |                                                              |        | 52/2321 | 0.017560 | 0.094006 | 0.073419 |
| BP | 271     | regulation of long-term synaptic potentiation                | 3/245  | 0       | 59       | 26       | 55       |
|    | GO:1901 |                                                              |        | 52/2321 | 0.017560 | 0.094006 | 0.073419 |
| BP | 570     | fatty acid derivative biosynthetic process                   | 3/245  | 0       | 59       | 26       | 55       |
|    | GO:1903 |                                                              |        | 52/2321 | 0.017560 | 0.094006 | 0.073419 |
| BP | 202     | negative regulation of oxidative stress-induced cell death   | 3/245  | 0       | 59       | 26       | 55       |
|    | GO:1902 |                                                              |        | 94/2321 | 0.017635 | 0.094241 | 0.073603 |
| BP | 882     | regulation of response to oxidative stress                   | 4/245  | 0       | 54       | 82       | 53       |
|    | GO:0019 |                                                              |        | 143/232 | 0.018037 | 0.096222 | 0.075150 |
| BP | 233     | sensory perception of pain                                   | 5/245  | 10      | 84       | 89       | 75       |
|    | GO:0070 |                                                              |        | 95/2321 | 0.018262 | 0.097251 | 0.075953 |
| BP | 585     | protein localization to mitochondrion                        | 4/245  | 0       | 51       | 06       | 76       |
|    | GO:0072 |                                                              |        | 374/232 | 0.018346 | 0.097529 | 0.076171 |
| BP | 594     | establishment of protein localization to organelle           | 9/245  | 10      | 83       | 57       | 28       |
|    | GO:1900 |                                                              |        | 53/2321 | 0.018472 | 0.097872 | 0.076438 |
| BP | 408     | negative regulation of cellular response to oxidative stress | 3/245  | 0       | 32       | 34       | 98       |
|    | GO:0032 |                                                              |        | 438/232 | 0.018475 | 0.097872 | 0.076438 |
| BP | 386     | regulation of intracellular transport                        | 10/245 | 10      | 57       | 34       | 98       |
|    | GO:0098 |                                                              |        | 144/232 | 0.018531 | 0.097996 | 0.076535 |
| BP | 693     | regulation of synaptic vesicle cycle                         | 5/245  | 10      | 11       | 11       | 65       |
|    | GO:0009 |                                                              |        | 198/232 | 0.018906 | 0.099805 | 0.077949 |
| BP | 743     | response to carbohydrate                                     | 6/245  | 10      | 12       | 96       | 16       |
| CC | GO:0005 | mitochondrial matrix                                         | 27/248 | 264/234 | 6.8557E- | 2.4447E- | 2.0762E- |

|    |         |                                   |        |         |          |          |          |
|----|---------|-----------------------------------|--------|---------|----------|----------|----------|
|    | 759     |                                   |        | 36      | 19       | 16       | 16       |
|    | GO:0019 |                                   |        | 475/234 | 1.2766E- | 2.4447E- | 2.0762E- |
| CC | 866     | organelle inner membrane          | 34/248 | 36      | 18       | 16       | 16       |
|    | GO:0005 |                                   |        | 433/234 | 5.6109E- | 7.1632E- | 6.0834E- |
| CC | 743     | mitochondrial inner membrane      | 32/248 | 36      | 18       | 16       | 16       |
|    | GO:0042 |                                   |        | 163/234 | 2.2826E- | 2.1856E- | 1.8562E- |
| CC | 383     | sarcolemma                        | 15/248 | 36      | 10       | 08       | 08       |
|    | GO:0030 |                                   |        | 70/2343 | 3.3393E- | 2.5579E- | 2.1723E- |
| CC | 315     | T-tubule                          | 10/248 | 6       | 09       | 07       | 07       |
|    | GO:0009 |                                   |        | 47/2343 | 9.8691E- | 0.000539 | 0.000458 |
| CC | 295     | nucleoid                          | 6/248  | 6       | 06       | 98       | 58       |
|    | GO:0042 |                                   |        | 47/2343 | 9.8691E- | 0.000539 | 0.000458 |
| CC | 645     | mitochondrial nucleoid            | 6/248  | 6       | 06       | 98       | 58       |
|    | GO:0016 |                                   |        | 75/2343 | 1.4689E- | 0.000703 | 0.000597 |
| CC | 529     | sarcoplasmic reticulum            | 7/248  | 6       | 05       | 23       | 22       |
|    | GO:0005 |                                   |        | 79/2343 | 2.0696E- | 0.000880 | 0.000747 |
| CC | 811     | lipid droplet                     | 7/248  | 6       | 05       | 75       | 97       |
|    | GO:0016 |                                   |        | 84/2343 | 3.0921E- | 0.001184 | 0.001005 |
| CC | 528     | sarcoplasm                        | 7/248  | 6       | 05       | 28       | 75       |
|    | GO:0098 |                                   |        | 263/234 | 0.000121 | 0.004230 | 0.003592 |
| CC | 798     | mitochondrial protein complex     | 11/248 | 36      | 5        | 38       | 66       |
|    | GO:1902 |                                   |        | 308/234 | 0.000470 | 0.014862 | 0.012622 |
| CC | 495     | transmembrane transporter complex | 11/248 | 36      | 62       | 86       | 3        |
|    | GO:0014 |                                   |        | 62/2343 | 0.000504 | 0.014862 | 0.012622 |
| CC | 704     | intercalated disc                 | 5/248  | 6       | 48       | 86       | 3        |
| CC | GO:1990 | transporter complex               | 11/248 | 315/234 | 0.000567 | 0.015520 | 0.013180 |

|    |         |                                           |        |  |         |          |          |          |
|----|---------|-------------------------------------------|--------|--|---------|----------|----------|----------|
|    | 351     |                                           |        |  | 36      | 32       | 13       | 48       |
|    | GO:0019 |                                           |        |  | 185/234 | 0.000822 | 0.017931 | 0.015228 |
| CC | 867     | outer membrane                            | 8/248  |  | 36      | 36       | 16       | 05       |
|    | GO:0031 |                                           |        |  | 185/234 | 0.000822 | 0.017931 | 0.015228 |
| CC | 968     | organelle outer membrane                  | 8/248  |  | 36      | 36       | 16       | 05       |
|    | GO:0005 |                                           |        |  | 143/234 | 0.000842 | 0.017931 | 0.015228 |
| CC | 777     | peroxisome                                | 7/248  |  | 36      | 72       | 16       | 05       |
|    | GO:0042 |                                           |        |  | 143/234 | 0.000842 | 0.017931 | 0.015228 |
| CC | 579     | microbody                                 | 7/248  |  | 36      | 72       | 16       | 05       |
|    | GO:0031 |                                           |        |  | 249/234 | 0.001402 | 0.026940 | 0.022879 |
| CC | 300     | intrinsic component of organelle membrane | 9/248  |  | 36      | 48       | 61       | 34       |
|    | GO:0005 |                                           |        |  | 407/234 | 0.001406 | 0.026940 | 0.022879 |
| CC | 635     | nuclear envelope                          | 12/248 |  | 36      | 82       | 61       | 34       |
|    | GO:0044 |                                           |        |  | 83/2343 | 0.001891 | 0.033475 | 0.028429 |
| CC | 291     | cell-cell contact zone                    | 5/248  |  | 6       | 67       | 9        | 45       |
|    | GO:0044 |                                           |        |  | 123/234 | 0.002004 | 0.033475 | 0.028429 |
| CC | 853     | plasma membrane raft                      | 6/248  |  | 36      | 37       | 9        | 45       |
|    | GO:0033 |                                           |        |  | 24/2343 | 0.002010 | 0.033475 | 0.028429 |
| CC | 017     | sarcoplasmic reticulum membrane           | 3/248  |  | 6       | 3        | 9        | 45       |
|    | GO:0005 |                                           |        |  | 168/234 | 0.002132 | 0.034035 | 0.028904 |
| CC | 741     | mitochondrial outer membrane              | 7/248  |  | 36      | 75       | 2        | 43       |
|    | GO:0034 |                                           |        |  | 219/234 | 0.002394 | 0.036680 | 0.031151 |
| CC | 703     | cation channel complex                    | 8/248  |  | 36      | 32       | 94       | 33       |
|    | GO:0031 |                                           |        |  | 222/234 | 0.002603 | 0.038351 | 0.032569 |
| CC | 301     | integral component of organelle membrane  | 8/248  |  | 36      | 48       | 22       | 82       |
| CC | GO:0005 | caveola                                   | 5/248  |  | 94/2343 | 0.003256 | 0.046196 | 0.039232 |

|    |         |                                               |        |         |          |          |          |
|----|---------|-----------------------------------------------|--------|---------|----------|----------|----------|
|    | 901     |                                               |        | 6       | 67       | 44       | 38       |
|    | GO:0034 |                                               |        | 293/234 | 0.004167 | 0.057001 | 0.048408 |
| CC | 702     | ion channel complex                           | 9/248  | 36      | 24       | 94       | 95       |
|    | GO:0045 |                                               |        | 364/234 | 0.005635 | 0.068160 | 0.057885 |
| CC | 121     | membrane raft                                 | 10/248 | 36      | 74       | 54       | 41       |
|    | GO:0098 |                                               |        | 365/234 | 0.005742 | 0.068160 | 0.057885 |
| CC | 857     | membrane microdomain                          | 10/248 | 36      | 18       | 54       | 41       |
|    | GO:0090 |                                               |        | 11/2343 | 0.005759 | 0.068160 | 0.057885 |
| CC | 533     | cation-transporting ATPase complex            | 2/248  | 6       | 79       | 54       | 41       |
|    | GO:1990 |                                               |        | 11/2343 | 0.005759 | 0.068160 | 0.057885 |
| CC | 454     | L-type voltage-gated calcium channel complex  | 2/248  | 6       | 79       | 54       | 41       |
|    | GO:1990 |                                               |        | 108/234 | 0.005872 | 0.068160 | 0.057885 |
| CC | 204     | oxidoreductase complex                        | 5/248  | 36      | 84       | 54       | 41       |
|    | GO:0045 |                                               |        | 370/234 | 0.006298 | 0.070697 | 0.060040 |
| CC | 211     | postsynaptic membrane                         | 10/248 | 36      | 15       | 61       | 02       |
|    | GO:0005 |                                               |        | 36/2343 | 0.006460 | 0.070697 | 0.060040 |
| CC | 790     | smooth endoplasmic reticulum                  | 3/248  | 6       | 62       | 61       | 02       |
|    | GO:0032 |                                               |        | 71/2343 | 0.006832 | 0.071049 | 0.060338 |
| CC | 592     | integral component of mitochondrial membrane  | 4/248  | 6       | 45       | 04       | 47       |
|    | GO:0030 |                                               |        | 12/2343 | 0.006863 | 0.071049 | 0.060338 |
| CC | 061     | mitochondrial crista                          | 2/248  | 6       | 75       | 04       | 47       |
|    | GO:0098 |                                               |        | 377/234 | 0.007145 | 0.072023 | 0.061166 |
| CC | 589     | membrane region                               | 10/248 | 36      | 94       | 59       | 11       |
|    | GO:0098 |                                               |        | 73/2343 | 0.007529 | 0.073944 | 0.062797 |
| CC | 573     | intrinsic component of mitochondrial membrane | 4/248  | 6       | 64       | 94       | 82       |
| CC | GO:0043 | myelin sheath                                 | 7/248  | 213/234 | 0.007758 | 0.074284 | 0.063086 |



|    |         |                                                                        |        |         |          |          |          |
|----|---------|------------------------------------------------------------------------|--------|---------|----------|----------|----------|
|    | 209     |                                                                        |        | 36      | 19       | 7        | 36       |
|    | GO:0098 |                                                                        |        | 13/2343 | 0.008055 | 0.075249 | 0.063905 |
| CC | 533     | ATPase dependent transmembrane transport complex                       | 2/248  | 6       | 42       | 37       | 61       |
|    | GO:0044 |                                                                        |        | 216/234 | 0.008345 | 0.076052 | 0.064587 |
| CC | 455     | mitochondrial membrane part                                            | 7/248  | 36      | 24       | 66       | 8        |
|    | GO:0012 |                                                                        |        | 332/234 | 0.009168 | 0.076052 | 0.064587 |
| CC | 506     | vesicle membrane                                                       | 9/248  | 36      | 51       | 66       | 8        |
|    | GO:0042 |                                                                        |        | 14/2343 | 0.009332 | 0.076052 | 0.064587 |
| CC | 581     | specific granule                                                       | 2/248  | 6       | 83       | 66       | 8        |
|    | GO:0045 |                                                                        |        | 14/2343 | 0.009332 | 0.076052 | 0.064587 |
| CC | 239     | tricarboxylic acid cycle enzyme complex                                | 2/248  | 6       | 83       | 66       | 8        |
|    | GO:0071 |                                                                        |        | 14/2343 | 0.009332 | 0.076052 | 0.064587 |
| CC | 006     | U2-type catalytic step 1 spliceosome                                   | 2/248  | 6       | 83       | 66       | 8        |
|    | GO:0071 |                                                                        |        | 14/2343 | 0.009332 | 0.076052 | 0.064587 |
| CC | 012     | catalytic step 1 spliceosome                                           | 2/248  | 6       | 83       | 66       | 8        |
|    | GO:0071 |                                                                        |        | 84/2343 | 0.012202 | 0.096192 | 0.081691 |
| CC | 013     | catalytic step 2 spliceosome                                           | 4/248  | 6       | 99       | 49       | 58       |
|    | GO:0031 |                                                                        |        | 233/234 | 0.012306 | 0.096192 | 0.081691 |
| CC | 965     | nuclear membrane                                                       | 7/248  | 36      | 61       | 49       | 58       |
|    | GO:0050 |                                                                        |        | 288/227 | 1.7754E- | 1.0031E- | 8.3165E- |
| MF | 662     | coenzyme binding                                                       | 24/251 | 10      | 14       | 11       | 12       |
|    | GO:0003 |                                                                        |        | 10/2271 | 3.4751E- | 9.7603E- | 8.0919E- |
| MF | 995     | acyl-CoA dehydrogenase activity                                        | 6/251  | 0       | 10       | 08       | 08       |
|    | GO:0016 |                                                                        |        | 56/2271 | 5.1825E- | 9.7603E- | 8.0919E- |
| MF | 627     | oxidoreductase activity, acting on the CH-CH group of donors           | 10/251 | 0       | 10       | 08       | 08       |
| MF | GO:0016 | oxidoreductase activity, acting on the aldehyde or oxo group of donors | 8/251  | 58/2271 | 2.3695E- | 3.0928E- | 2.5641E- |

|    |         |                                                                                |        |         |          |          |          |
|----|---------|--------------------------------------------------------------------------------|--------|---------|----------|----------|----------|
|    | 903     |                                                                                |        | 0       | 07       | 05       | 05       |
|    | GO:0050 |                                                                                |        | 82/2271 | 3.0958E- | 3.0928E- | 2.5641E- |
| MF | 660     | flavin adenine dinucleotide binding                                            | 9/251  | 0       | 07       | 05       | 05       |
|    | GO:0000 |                                                                                |        | 26/2271 | 3.2844E- | 3.0928E- | 2.5641E- |
| MF | 062     | fatty-acyl-CoA binding                                                         | 6/251  | 0       | 07       | 05       | 05       |
|    | GO:0016 |                                                                                |        | 146/227 | 7.1095E- | 5.7384E- | 4.7575E- |
| MF | 874     | ligase activity                                                                | 11/251 | 10      | 07       | 05       | 05       |
|    | GO:0016 | oxidoreductase activity, acting on the aldehyde or oxo group of donors, NAD or |        | 48/2271 | 9.2713E- | 6.5479E- | 5.4286E- |
| MF | 620     | NADP as acceptor                                                               | 7/251  | 0       | 07       | 05       | 05       |
|    | GO:0016 |                                                                                |        | 267/227 | 1.7983E- | 0.000109 | 9.085E-0 |
| MF | 746     | transferase activity, transferring acyl groups                                 | 14/251 | 10      | 06       | 58       | 5        |
|    | GO:1901 |                                                                                |        | 35/2271 | 2.1304E- | 0.000109 | 9.085E-0 |
| MF | 567     | fatty acid derivative binding                                                  | 6/251  | 0       | 06       | 58       | 5        |
|    | GO:0016 |                                                                                |        | 233/227 | 2.1334E- | 0.000109 | 9.085E-0 |
| MF | 747     | transferase activity, transferring acyl groups other than amino-acyl groups    | 13/251 | 10      | 06       | 58       | 5        |
|    | GO:0008 |                                                                                |        | 43/2271 | 7.4314E- | 0.000349 | 0.000290 |
| MF | 374     | O-acyltransferase activity                                                     | 6/251  | 0       | 06       | 9        | 09       |
|    | GO:0030 |                                                                                |        | 51/2271 | 2.039E-0 | 0.000886 | 0.000734 |
| MF | 170     | pyridoxal phosphate binding                                                    | 6/251  | 0       | 5        | 19       | 71       |
|    | GO:0070 |                                                                                |        | 52/2271 | 2.2838E- | 0.000921 | 0.000764 |
| MF | 279     | vitamin B6 binding                                                             | 6/251  | 0       | 05       | 69       | 14       |
|    | GO:0052 |                                                                                |        | 156/227 | 6.2026E- | 0.002225 | 0.001844 |
| MF | 689     | carboxylic ester hydrolase activity                                            | 9/251  | 10      | 05       | 26       | 88       |
|    | GO:0022 |                                                                                |        | 414/227 | 6.3016E- | 0.002225 | 0.001844 |
| MF | 838     | substrate-specific channel activity                                            | 15/251 | 10      | 05       | 26       | 88       |
| MF | GO:0033 | amide binding                                                                  | 14/251 | 371/227 | 7.1947E- | 0.002360 | 0.001956 |

|    |         |                                                              |        |         |          |          |          |
|----|---------|--------------------------------------------------------------|--------|---------|----------|----------|----------|
|    | 218     |                                                              |        | 10      | 05       | 43       | 95       |
|    | GO:0016 |                                                              |        | 21/2271 |          | 0.002360 | 0.001956 |
| MF | 408     | C-acyltransferase activity                                   | 4/251  | 0       | 7.52E-05 | 43       | 95       |
|    | GO:0008 |                                                              |        | 22/2271 | 9.1115E- | 0.002709 | 0.002246 |
| MF | 483     | transaminase activity                                        | 4/251  | 0       | 05       | 48       | 33       |
|    | GO:0015 |                                                              |        | 438/227 | 0.000117 | 0.003168 | 0.002626 |
| MF | 267     | channel activity                                             | 15/251 | 10      | 76       | 28       | 71       |
|    | GO:0022 |                                                              |        | 438/227 | 0.000117 | 0.003168 | 0.002626 |
| MF | 803     | passive transmembrane transporter activity                   | 15/251 | 10      | 76       | 28       | 71       |
|    | GO:0016 |                                                              |        | 24/2271 | 0.000130 | 0.003340 | 0.002769 |
| MF | 769     | transferase activity, transferring nitrogenous groups        | 4/251  | 0       | 08       | 63       | 59       |
|    | GO:0005 |                                                              |        | 402/227 | 0.000166 | 0.004097 | 0.003397 |
| MF | 216     | ion channel activity                                         | 14/251 | 10      | 82       | 91       | 43       |
|    | GO:0016 |                                                              |        | 27/2271 | 0.000209 | 0.004927 | 0.004085 |
| MF | 645     | oxidoreductase activity, acting on the CH-NH group of donors | 4/251  | 0       | 32       | 65       | 33       |
|    | GO:0005 |                                                              |        | 192/227 | 0.000298 | 0.006482 | 0.005374 |
| MF | 244     | voltage-gated ion channel activity                           | 9/251  | 10      | 31       | 53       | 43       |
|    | GO:0022 |                                                              |        | 192/227 | 0.000298 | 0.006482 | 0.005374 |
| MF | 832     | voltage-gated channel activity                               | 9/251  | 10      | 31       | 53       | 43       |
|    | GO:0022 |                                                              |        | 331/227 | 0.000338 | 0.007082 | 0.005871 |
| MF | 836     | gated channel activity                                       | 12/251 | 10      | 46       | 56       | 89       |
|    | GO:0044 |                                                              |        | 13/2271 | 0.000351 | 0.007093 | 0.005880 |
| MF | 548     | S100 protein binding                                         | 3/251  | 0       | 52       | 14       | 66       |
|    | GO:1901 |                                                              |        | 250/227 | 0.000492 | 0.009596 | 0.007955 |
| MF | 681     | sulfur compound binding                                      | 10/251 | 10      | 54       | 03       | 72       |
| MF | GO:0016 | acylglycerol O-acyltransferase activity                      | 3/251  | 15/2271 | 0.000550 | 0.010361 | 0.008590 |

|    |         |                                                                   |        |         |          |          |          |
|----|---------|-------------------------------------------------------------------|--------|---------|----------|----------|----------|
|    | 411     |                                                                   |        | 0       | 16       | 33       | 2        |
|    | GO:0051 |                                                                   |        | 62/2271 | 0.000613 | 0.011130 | 0.009228 |
| MF | 287     | NAD binding                                                       | 5/251  | 0       | 74       | 92       | 24       |
|    | GO:0022 |                                                                   |        | 355/227 | 0.000630 | 0.011130 | 0.009228 |
| MF | 804     | active transmembrane transporter activity                         | 12/251 | 10      | 42       | 92       | 24       |
|    | GO:0019 |                                                                   |        | 132/227 | 0.000676 | 0.011583 | 0.009603 |
| MF | 842     | vitamin binding                                                   | 7/251  | 10      | 54       | 11       | 14       |
|    | GO:0051 |                                                                   |        | 97/2271 | 0.000733 | 0.012026 | 0.009971 |
| MF | 082     | unfolded protein binding                                          | 6/251  | 0       | 24       | 89       | 06       |
|    | GO:0005 |                                                                   |        | 312/227 | 0.000748 | 0.012026 | 0.009971 |
| MF | 261     | cation channel activity                                           | 11/251 | 10      | 22       | 89       | 06       |
|    | GO:0004 |                                                                   |        | 17/2271 | 0.000808 | 0.012026 | 0.009971 |
| MF | 029     | aldehyde dehydrogenase (NAD) activity                             | 3/251  | 0       | 89       | 89       | 06       |
|    | GO:0004 |                                                                   |        | 17/2271 | 0.000808 | 0.012026 | 0.009971 |
| MF | 724     | magnesium-dependent protein serine/threonine phosphatase activity | 3/251  | 0       | 89       | 89       | 06       |
|    | GO:0034 |                                                                   |        | 17/2271 | 0.000808 | 0.012026 | 0.009971 |
| MF | 185     | apolipoprotein binding                                            | 3/251  | 0       | 89       | 89       | 06       |
|    | GO:0022 |                                                                   |        | 319/227 | 0.000896 | 0.012987 | 0.010767 |
| MF | 839     | ion gated channel activity                                        | 11/251 | 10      | 5        | 78       | 7        |
|    | GO:0046 |                                                                   |        | 426/227 | 0.000975 | 0.013777 | 0.011422 |
| MF | 873     | metal ion transmembrane transporter activity                      | 13/251 | 10      | 42       | 76       | 64       |
|    | GO:0022 |                                                                   |        | 143/227 | 0.001083 | 0.014928 | 0.012376 |
| MF | 843     | voltage-gated cation channel activity                             | 7/251  | 10      | 3        | 35       | 55       |
|    | GO:0097 |                                                                   |        | 71/2271 | 0.001139 | 0.015328 | 0.012707 |
| MF | 110     | scaffold protein binding                                          | 5/251  | 0       | 43       | 08       | 96       |
| MF | GO:0008 | protein C-terminus binding                                        | 9/251  | 234/227 | 0.001229 | 0.016158 | 0.013396 |

|    |         |                                                                |        |         |          |          |          |
|----|---------|----------------------------------------------------------------|--------|---------|----------|----------|----------|
|    | 022     |                                                                |        | 10      | 74       | 18       | 16       |
|    | GO:0015 |                                                                |        | 76/2271 | 0.001546 | 0.019855 | 0.016461 |
| MF | 297     | antiporter activity                                            | 5/251  | 0       | 29       | 74       | 68       |
|    | GO:0016 |                                                                |        | 46/2271 | 0.001651 | 0.020735 | 0.017190 |
| MF | 790     | thiolester hydrolase activity                                  | 4/251  | 0       | 48       | 22       | 82       |
|    | GO:0034 |                                                                |        | 22/2271 | 0.001758 | 0.021295 | 0.017655 |
| MF | 237     | protein kinase A regulatory subunit binding                    | 3/251  | 0       | 69       | 12       | 01       |
|    | GO:0016 |                                                                |        | 115/227 | 0.001771 | 0.021295 | 0.017655 |
| MF | 407     | acetyltransferase activity                                     | 6/251  | 10      | 45       | 12       | 01       |
|    | GO:0015 |                                                                |        | 157/227 | 0.001854 | 0.021827 | 0.018096 |
| MF | 079     | potassium ion transmembrane transporter activity               | 7/251  | 10      | 36       | 34       | 26       |
|    | GO:0005 |                                                                |        | 121/227 | 0.002290 | 0.026379 | 0.021870 |
| MF | 267     | potassium channel activity                                     | 6/251  | 10      | 99       | 93       | 65       |
|    | GO:0015 |                                                                |        | 360/227 | 0.002334 | 0.026379 | 0.021870 |
| MF | 077     | monovalent inorganic cation transmembrane transporter activity | 11/251 | 10      | 51       | 93       | 65       |
|    | GO:0005 |                                                                |        | 85/2271 | 0.002533 | 0.027737 | 0.022996 |
| MF | 249     | voltage-gated potassium channel activity                       | 5/251  | 0       | 97       | 63       | 27       |
|    | GO:0047 |                                                                |        | 25/2271 | 0.002563 | 0.027737 | 0.022996 |
| MF | 617     | acyl-CoA hydrolase activity                                    | 3/251  | 0       | 27       | 63       | 27       |
|    | GO:0051 |                                                                |        | 52/2271 | 0.002601 | 0.027737 | 0.022996 |
| MF | 018     | protein kinase A binding                                       | 4/251  | 0       | 94       | 63       | 27       |
|    | GO:0016 |                                                                |        | 26/2271 | 0.002874 | 0.030072 | 0.024931 |
| MF | 878     | acid-thiol ligase activity                                     | 3/251  | 0       | 15       | 1        | 69       |
|    | GO:0015 |                                                                |        | 27/2271 | 0.003207 | 0.032358 | 0.026827 |
| MF | 301     | anion:anion antiporter activity                                | 3/251  | 0       | 25       | 88       | 58       |
| MF | GO:0016 | CoA hydrolase activity                                         | 3/251  | 27/2271 | 0.003207 | 0.032358 | 0.026827 |

|    |         |                                                                  |       |         |          |          |          |
|----|---------|------------------------------------------------------------------|-------|---------|----------|----------|----------|
|    | 289     |                                                                  |       | 0       | 25       | 88       | 58       |
|    | GO:0060 |                                                                  |       | 225/227 | 0.003673 | 0.036409 | 0.030185 |
| MF | 090     | molecular adaptor activity                                       | 8/251 | 10      | 15       | 26       | 6        |
|    | GO:0042 |                                                                  |       | 282/227 | 0.004303 | 0.041923 | 0.034756 |
| MF | 623     | ATPase activity, coupled                                         | 9/251 | 10      | 61       | 13       | 95       |
|    | GO:0005 |                                                                  |       | 148/227 | 0.006145 | 0.055316 | 0.045860 |
| MF | 342     | organic acid transmembrane transporter activity                  | 6/251 | 10      | 6        | 46       | 87       |
|    | GO:0046 |                                                                  |       | 148/227 | 0.006145 | 0.055316 | 0.045860 |
| MF | 943     | carboxylic acid transmembrane transporter activity               | 6/251 | 10      | 6        | 46       | 87       |
|    | GO:0005 |                                                                  |       | 34/2271 | 0.006199 | 0.055316 | 0.045860 |
| MF | 310     | dicarboxylic acid transmembrane transporter activity             | 3/251 | 0       | 45       | 46       | 87       |
|    | GO:0003 |                                                                  |       | 11/2271 | 0.006265 | 0.055316 | 0.045860 |
| MF | 841     | 1-acylglycerol-3-phosphate O-acyltransferase activity            | 2/251 | 0       | 94       | 46       | 87       |
|    | GO:0015 |                                                                  |       | 11/2271 | 0.006265 | 0.055316 | 0.045860 |
| MF | 174     | basic amino acid transmembrane transporter activity              | 2/251 | 0       | 94       | 46       | 87       |
|    | GO:0102 |                                                                  |       | 11/2271 | 0.006265 | 0.055316 | 0.045860 |
| MF | 991     | myristoyl-CoA hydrolase activity                                 | 2/251 | 0       | 94       | 46       | 87       |
|    | GO:0005 |                                                                  |       | 108/227 | 0.007022 | 0.061044 | 0.050610 |
| MF | 496     | steroid binding                                                  | 5/251 | 10      | 87       | 92       | 13       |
|    | GO:0042 |                                                                  |       | 12/2271 | 0.007464 | 0.063901 | 0.052978 |
| MF | 171     | lysophosphatidic acid acyltransferase activity                   | 2/251 | 0       | 6        | 48       | 41       |
|    | GO:0008 |                                                                  |       | 310/227 | 0.007844 | 0.065281 | 0.054122 |
| MF | 509     | anion transmembrane transporter activity                         | 9/251 | 10      | 94       | 39       | 44       |
|    | GO:0016 |                                                                  |       | 37/2271 | 0.007856 | 0.065281 | 0.054122 |
| MF | 877     | ligase activity, forming carbon-sulfur bonds                     | 3/251 | 0       | 88       | 39       | 44       |
| MF | GO:0042 | ATPase activity, coupled to transmembrane movement of substances | 5/251 | 113/227 | 0.008461 | 0.068834 | 0.057068 |

|    |         |                                                               |       |         |          |          |          |
|----|---------|---------------------------------------------------------------|-------|---------|----------|----------|----------|
|    | 626     |                                                               |       | 10      | 44       | 68       | 34       |
|    | GO:0002 |                                                               |       | 13/2271 | 0.008757 | 0.068834 | 0.057068 |
| MF | 161     | aminoacyl-tRNA editing activity                               | 2/251 | 0       | 89       | 68       | 34       |
|    | GO:0015 |                                                               |       | 13/2271 | 0.008757 | 0.068834 | 0.057068 |
| MF | 556     | C4-dicarboxylate transmembrane transporter activity           | 2/251 | 0       | 89       | 68       | 34       |
|    | GO:0043 |                                                               |       | 114/227 | 0.008771 | 0.068834 | 0.057068 |
| MF | 492     | ATPase activity, coupled to movement of substances            | 5/251 | 10      | 85       | 68       | 34       |
|    | GO:0030 |                                                               |       | 116/227 | 0.009416 | 0.072878 | 0.060420 |
| MF | 165     | PDZ domain binding                                            | 5/251 | 10      | 13       | 27       | 74       |
|    | GO:0016 |                                                               |       | 265/227 | 0.009551 | 0.072930 | 0.060463 |
| MF | 791     | phosphatase activity                                          | 8/251 | 10      | 9        | 07       | 68       |
|    | GO:0071 |                                                               |       | 14/2271 | 0.010143 | 0.075641 | 0.062711 |
| MF | 617     | lysophospholipid acyltransferase activity                     | 2/251 | 0       | 58       | 43       | 58       |
|    | GO:0004 |                                                               |       | 41/2271 | 0.010436 | 0.075641 | 0.062711 |
| MF | 812     | aminoacyl-tRNA ligase activity                                | 3/251 | 0       | 86       | 43       | 58       |
|    | GO:0016 |                                                               |       | 41/2271 | 0.010436 | 0.075641 | 0.062711 |
| MF | 875     | ligase activity, forming carbon-oxygen bonds                  | 3/251 | 0       | 86       | 43       | 58       |
|    | GO:0015 |                                                               |       | 119/227 | 0.010442 | 0.075641 | 0.062711 |
| MF | 405     | P-P-bond-hydrolysis-driven transmembrane transporter activity | 5/251 | 10      | 53       | 43       | 58       |
|    | GO:0015 |                                                               |       | 121/227 | 0.011167 | 0.079871 | 0.066218 |
| MF | 399     | primary active transmembrane transporter activity             | 5/251 | 10      | 83       | 22       | 34       |
|    | GO:0016 |                                                               |       | 122/227 | 0.011543 | 0.081522 | 0.067587 |
| MF | 298     | lipase activity                                               | 5/251 | 10      | 06       | 83       | 63       |
|    | GO:0004 |                                                               |       | 171/227 | 0.012047 | 0.084031 | 0.069667 |
| MF | 721     | phosphoprotein phosphatase activity                           | 6/251 | 10      | 03       | 73       | 67       |
| MF | GO:0016 | palmitoyl-CoA hydrolase activity                              | 2/251 | 16/2271 | 0.013183 | 0.089742 | 0.074402 |

|      |         |                                                                           |        |         |          |          |          |
|------|---------|---------------------------------------------------------------------------|--------|---------|----------|----------|----------|
|      | 290     |                                                                           |        | 0       | 47       | 89       | 58       |
|      | GO:0070 |                                                                           |        | 16/2271 | 0.013183 | 0.089742 | 0.074402 |
| MF   | 006     | metalloaminopeptidase activity                                            | 2/251  | 0       | 47       | 89       | 58       |
|      | GO:0016 |                                                                           |        | 46/2271 | 0.014276 | 0.096023 | 0.079609 |
| MF   | 879     | ligase activity, forming carbon-nitrogen bonds                            | 3/251  | 0       | 09       | 7        | 77       |
|      | GO:0016 | oxidoreductase activity, acting on the CH-NH group of donors, NAD or NADP |        | 17/2271 | 0.014833 | 0.098120 | 0.081347 |
| MF   | 646     | as acceptor                                                               | 2/251  | 0       | 41       | 17       | 88       |
|      | GO:0015 |                                                                           |        | 47/2271 | 0.015127 | 0.098120 | 0.081347 |
| MF   | 459     | potassium channel regulator activity                                      | 3/251  | 0       | 44       | 17       | 88       |
|      | GO:0015 |                                                                           |        | 86/2271 | 0.015266 | 0.098120 | 0.081347 |
| MF   | 238     | drug transmembrane transporter activity                                   | 4/251  | 0       | 16       | 17       | 88       |
|      | GO:0015 |                                                                           |        | 233/227 | 0.015282 | 0.098120 | 0.081347 |
| MF   | 291     | secondary active transmembrane transporter activity                       | 7/251  | 10      | 43       | 17       | 88       |
|      | mmu0007 |                                                                           |        |         | 3.2525E- | 7.3181E- | 6.2311E- |
| KEGG | 1       | Fatty acid degradation                                                    | 12/151 | 51/8910 | 11       | 09       | 09       |
|      | mmu0028 |                                                                           |        |         | 1.3281E- | 1.4941E- | 1.2721E- |
| KEGG | 0       | Valine, leucine and isoleucine degradation                                | 12/151 | 57/8910 | 10       | 08       | 08       |
|      | mmu0064 |                                                                           |        |         | 3.3185E- | 2.4888E- | 2.1192E- |
| KEGG | 0       | Propanoate metabolism                                                     | 9/151  | 34/8910 | 09       | 07       | 07       |
|      | mmu0120 |                                                                           |        | 124/891 | 1.5429E- | 8.679E-0 | 7.3898E- |
| KEGG | 0       | Carbon metabolism                                                         | 13/151 | 0       | 07       | 6        | 06       |
|      | mmu0121 |                                                                           |        |         | 8.5682E- | 3.8557E- | 3.283E-0 |
| KEGG | 2       | Fatty acid metabolism                                                     | 9/151  | 62/8910 | 07       | 05       | 5        |
|      | mmu0062 |                                                                           |        |         | 3.4099E- | 0.000127 | 0.000108 |
| KEGG | 0       | Pyruvate metabolism                                                       | 7/151  | 39/8910 | 06       | 87       | 88       |
| KEGG | mmu0493 | Insulin resistance                                                        | 10/151 | 110/891 | 1.5958E- | 0.000512 | 0.000436 |



|      |         |                                                 |       |         |          |          |          |
|------|---------|-------------------------------------------------|-------|---------|----------|----------|----------|
|      | 1       |                                                 |       | 0       | 05       | 95       | 76       |
|      | mmu0033 |                                                 |       |         | 3.1743E- | 0.000892 | 0.000760 |
| KEGG | 0       | Arginine and proline metabolism                 | 7/151 | 54/8910 | 05       | 77       | 16       |
|      | mmu0497 |                                                 |       |         | 7.793E-0 | 0.001948 | 0.001658 |
| KEGG | 5       | Fat digestion and absorption                    | 6/151 | 43/8910 | 5        | 24       | 85       |
|      | mmu0332 |                                                 |       |         | 0.000125 | 0.002814 | 0.002396 |
| KEGG | 0       | PPAR signaling pathway                          | 8/151 | 89/8910 | 09       | 47       | 41       |
|      | mmu0041 |                                                 |       |         | 0.000155 | 0.003185 | 0.002712 |
| KEGG | 0       | beta-Alanine metabolism                         | 5/151 | 31/8910 | 75       | 75       | 54       |
|      | mmu0541 |                                                 |       |         | 0.000183 | 0.003442 | 0.002930 |
| KEGG | 4       | Dilated cardiomyopathy                          | 8/151 | 94/8910 | 59       | 28       | 97       |
|      | mmu0121 |                                                 |       |         | 0.000310 | 0.005005 | 0.004261 |
| KEGG | 0       | 2-Oxocarboxylic acid metabolism                 | 4/151 | 20/8910 | 85       | 17       | 71       |
|      | mmu0541 |                                                 |       |         | 0.000311 | 0.005005 | 0.004261 |
| KEGG | 2       | Arrhythmogenic right ventricular cardiomyopathy | 7/151 | 77/8910 | 43       | 17       | 71       |
|      | mmu0025 |                                                 |       |         | 0.000473 | 0.007098 | 0.006044 |
| KEGG | 0       | Alanine, aspartate and glutamate metabolism     | 5/151 | 39/8910 | 26       | 83       | 38       |
|      | mmu0056 |                                                 |       |         | 0.000603 | 0.008483 | 0.007223 |
| KEGG | 1       | Glycerolipid metabolism                         | 6/151 | 62/8910 | 26       | 34       | 24       |
|      | mmu0541 |                                                 |       |         | 0.000860 | 0.011390 | 0.009698 |
| KEGG | 0       | Hypertrophic cardiomyopathy                     | 7/151 | 91/8910 | 64       | 78       | 82       |
|      | mmu0001 |                                                 |       |         | 0.000913 | 0.011421 | 0.009724 |
| KEGG | 0       | Glycolysis / Gluconeogenesis                    | 6/151 | 67/8910 | 69       | 07       | 61       |
|      | mmu0006 |                                                 |       |         | 0.001353 | 0.016029 | 0.013648 |
| KEGG | 2       | Fatty acid elongation                           | 4/151 | 29/8910 | 61       | 54       | 55       |
| KEGG | mmu0038 | Tryptophan metabolism                           | 5/151 | 52/8910 | 0.001790 | 0.020144 | 0.017152 |

|      |         |                                        |       |         |          |          |          |
|------|---------|----------------------------------------|-------|---------|----------|----------|----------|
|      | 0       |                                        |       |         | 63       | 56       | 33       |
|      | mmu0492 |                                        |       | 104/891 | 0.001881 | 0.020162 | 0.017167 |
| KEGG | 2       | Glucagon signaling pathway             | 7/151 | 0       | 82       | 36       | 48       |
|      | mmu0414 |                                        |       |         | 0.003309 | 0.033851 | 0.028823 |
| KEGG | 6       | Peroxisome                             | 6/151 | 86/8910 | 95       | 72       | 45       |
|      | mmu0426 |                                        |       |         | 0.003506 | 0.034302 | 0.029206 |
| KEGG | 0       | Cardiac muscle contraction             | 6/151 | 87/8910 | 44       | 11       | 95       |
|      | mmu0426 |                                        |       | 152/891 | 0.004242 | 0.038094 | 0.032436 |
| KEGG | 1       | Adrenergic signaling in cardiomyocytes | 8/151 | 0       | 39       | 84       | 31       |
|      | mmu0022 |                                        |       |         | 0.004402 | 0.038094 | 0.032436 |
| KEGG | 0       | Arginine biosynthesis                  | 3/151 | 20/8910 | 07       | 84       | 31       |
|      | mmu0077 |                                        |       |         | 0.004402 | 0.038094 | 0.032436 |
| KEGG | 0       | Pantothenate and CoA biosynthesis      | 3/151 | 20/8910 | 07       | 84       | 31       |
|      | mmu0415 |                                        |       | 126/891 | 0.005497 | 0.045810 | 0.039005 |
| KEGG | 2       | AMPK signaling pathway                 | 7/151 | 0       | 26       | 47       | 88       |
|      | mmu0491 |                                        |       | 139/891 | 0.009267 | 0.072332 | 0.061588 |
| KEGG | 0       | Insulin signaling pathway              | 7/151 | 0       | 33       | 07       | 01       |
|      | mmu0034 |                                        |       |         | 0.009322 | 0.072332 | 0.061588 |
| KEGG | 0       | Histidine metabolism                   | 3/151 | 26/8910 | 8        | 07       | 01       |
|      | mmu0123 |                                        |       |         | 0.010792 | 0.080942 | 0.068919 |
| KEGG | 0       | Biosynthesis of amino acids            | 5/151 | 79/8910 | 29       | 14       | 16       |
|      | mmu0065 |                                        |       |         | 0.011461 | 0.083185 | 0.070829 |
| KEGG | 0       | Butanoate metabolism                   | 3/151 | 28/8910 | 09       | 34       | 16       |

Table S7. GO analysis of DEGs in VO and TAC groups with no interaction.

| ID | Description | GeneR | BgRatio | pvalue | p.adjust | qvalue | Count |
|----|-------------|-------|---------|--------|----------|--------|-------|
|----|-------------|-------|---------|--------|----------|--------|-------|

|        |                                                     | atio   |        |         |         |         |
|--------|-----------------------------------------------------|--------|--------|---------|---------|---------|
| GO:004 |                                                     | 87/171 | 395/23 | 1.0512E | 6.1411E | 4.1948E |
| 2692   | muscle cell differentiation                         | 0      | 210    | -20     | -17     | -17     |
| GO:005 |                                                     | 75/171 | 316/23 | 5.2563E | 1.5354E | 1.0488E |
| 1146   | striated muscle cell differentiation                | 0      | 210    | -20     | -16     | -16     |
| GO:000 |                                                     | 91/171 | 459/23 | 2.1786E | 4.2426E | 2.898E- |
| 7005   | mitochondrion organization                          | 0      | 210    | -18     | -15     | 15      |
| GO:000 |                                                     | 77/171 | 379/23 | 2.2827E | 3.3339E | 2.2773E |
| 6091   | generation of precursor metabolites and energy      | 0      | 210    | -16     | -13     | -13     |
| GO:001 |                                                     | 60/171 | 254/23 | 3.6082E | 4.2158E | 2.8797E |
| 5980   | energy derivation by oxidation of organic compounds | 0      | 210    | -16     | -13     | -13     |
| GO:003 |                                                     | 76/171 | 393/23 | 5.8637E | 5.7093E | 3.8999E |
| 2970   | regulation of actin filament-based process          | 0      | 210    | -15     | -12     | -12     |
| GO:000 |                                                     | 79/171 | 447/23 | 2.6493E | 2.211E- | 1.5103E |
| 6163   | purine nucleotide metabolic process                 | 0      | 210    | -13     | 10      | -10     |
| GO:000 |                                                     | 77/171 | 433/23 | 3.8391E | 2.5432E | 1.7372E |
| 9259   | ribonucleotide metabolic process                    | 0      | 210    | -13     | -10     | -10     |
| GO:000 |                                                     | 73/171 | 400/23 | 4.2174E | 2.5432E | 1.7372E |
| 7015   | actin filament organization                         | 0      | 210    | -13     | -10     | -10     |
| GO:004 |                                                     | 42/171 | 163/23 | 4.3532E | 2.5432E | 1.7372E |
| 5333   | cellular respiration                                | 0      | 210    | -13     | -10     | -10     |
| GO:000 |                                                     | 60/171 | 298/23 | 7.0948E | 3.768E- | 2.5738E |
| 9141   | nucleoside triphosphate metabolic process           | 0      | 210    | -13     | 10      | -10     |
| GO:000 |                                                     | 75/171 | 423/23 | 9.0621E | 4.4118E | 3.0136E |
| 9150   | purine ribonucleotide metabolic process             | 0      | 210    | -13     | -10     | -10     |
| GO:001 | ribose phosphate metabolic process                  | 78/171 | 450/23 | 1.0553E | 4.7422E | 3.2393E |

|        |                                                      |        |        |         |         |         |    |
|--------|------------------------------------------------------|--------|--------|---------|---------|---------|----|
| 9693   |                                                      | 0      | 210    | -12     | -10     | -10     |    |
| GO:003 |                                                      | 65/171 | 344/23 | 1.6348E | 6.8217E | 4.6597E |    |
| 2956   | regulation of actin cytoskeleton organization        | 0      | 210    | -12     | -10     | -10     | 65 |
| GO:006 |                                                      | 80/171 | 472/23 | 1.7934E | 6.8709E | 4.6934E |    |
| 0537   | muscle tissue development                            | 0      | 210    | -12     | -10     | -10     | 80 |
| GO:007 |                                                      | 82/171 | 490/23 | 1.8818E | 6.8709E | 4.6934E |    |
| 2521   | purine-containing compound metabolic process         | 0      | 210    | -12     | -10     | -10     | 82 |
| GO:005 |                                                      | 47/171 | 207/23 | 2.624E- | 9.0173E | 6.1595E |    |
| 5001   | muscle cell development                              | 0      | 210    | 12      | -10     | -10     | 47 |
| GO:005 |                                                      | 44/171 | 193/23 | 1.1237E | 3.6472E | 2.4913E |    |
| 5002   | striated muscle cell development                     | 0      | 210    | -11     | -09     | -09     | 44 |
| GO:001 |                                                      | 75/171 | 449/23 | 1.8346E | 5.641E- | 3.8532E |    |
| 4706   | striated muscle tissue development                   | 0      | 210    | -11     | 09      | -09     | 75 |
| GO:005 |                                                      | 39/171 | 161/23 | 2.3243E | 6.7856E | 4.6351E |    |
| 1147   | regulation of muscle cell differentiation            | 0      | 210    | -11     | -09     | -09     | 39 |
| GO:190 |                                                      | 63/171 | 348/23 | 2.4392E | 6.7856E | 4.6351E |    |
| 2903   | regulation of supramolecular fiber organization      | 0      | 210    | -11     | -09     | -09     | 63 |
| GO:011 |                                                      | 51/171 | 255/23 | 4.8199E | 1.2799E | 8.7427E |    |
| 0053   | regulation of actin filament organization            | 0      | 210    | -11     | -08     | -09     | 51 |
| GO:000 |                                                      | 54/171 | 281/23 | 6.4317E | 1.6336E | 1.1159E |    |
| 9144   | purine nucleoside triphosphate metabolic process     | 0      | 210    | -11     | -08     | -08     | 54 |
| GO:000 |                                                      | 52/171 | 272/23 | 1.761E- | 4.2865E | 2.928E- |    |
| 9205   | purine ribonucleoside triphosphate metabolic process | 0      | 210    | 10      | -08     | 08      | 52 |
| GO:002 |                                                      | 26/171 | 85/232 | 2.0975E | 4.9014E | 3.348E- |    |
| 2900   | electron transport chain                             | 0      | 10     | -10     | -08     | 08      | 26 |
| GO:190 | response to peptide                                  | 65/171 | 384/23 | 2.3048E | 4.9309E | 3.3682E | 65 |

|        |                                                                          |        |        |         |         |         |    |
|--------|--------------------------------------------------------------------------|--------|--------|---------|---------|---------|----|
| 1652   |                                                                          | 0      | 210    | -10     | -08     | -08     |    |
| GO:005 |                                                                          | 52/171 | 274/23 | 2.3206E | 4.9309E | 3.3682E |    |
| 1258   | protein polymerization                                                   | 0      | 210    | -10     | -08     | -08     | 52 |
| GO:004 |                                                                          | 58/171 | 324/23 | 2.3633E | 4.9309E | 3.3682E |    |
| 3434   | response to peptide hormone                                              | 0      | 210    | -10     | -08     | -08     | 58 |
| GO:005 |                                                                          | 49/171 | 251/23 | 2.7739E | 5.588E- | 3.817E- |    |
| 1188   | cofactor biosynthetic process                                            | 0      | 210    | -10     | 08      | 08      | 49 |
| GO:000 |                                                                          | 52/171 | 276/23 | 3.0478E | 5.935E- | 4.0541E |    |
| 9199   | ribonucleoside triphosphate metabolic process                            | 0      | 210    | -10     | 08      | -08     | 52 |
| GO:200 |                                                                          | 52/171 | 281/23 | 5.9377E | 1.119E- | 7.6433E |    |
| 0146   | negative regulation of cell motility                                     | 0      | 210    | -10     | 07      | -08     | 52 |
| GO:005 |                                                                          | 31/171 | 123/23 | 8.9227E | 1.629E- | 1.1127E |    |
| 1153   | regulation of striated muscle cell differentiation                       | 0      | 210    | -10     | 07      | -07     | 31 |
| GO:000 |                                                                          | 52/171 | 285/23 | 9.9775E | 1.7663E | 1.2065E |    |
| 9123   | nucleoside monophosphate metabolic process                               | 0      | 210    | -10     | -07     | -07     | 52 |
| GO:000 |                                                                          | 64/171 | 392/23 | 1.4347E | 2.4652E | 1.6839E |    |
| 3012   | muscle system process                                                    | 0      | 210    | -09     | -07     | -07     | 64 |
| GO:000 |                                                                          | 60/171 | 357/23 | 1.4998E | 2.495E- | 1.7042E |    |
| 7178   | transmembrane receptor protein serine/threonine kinase signaling pathway | 0      | 210    | -09     | 07      | -07     | 60 |
| GO:004 |                                                                          | 47/171 | 247/23 | 1.5375E | 2.495E- | 1.7042E |    |
| 6034   | ATP metabolic process                                                    | 0      | 210    | -09     | 07      | -07     | 47 |
| GO:005 |                                                                          | 55/171 | 316/23 | 1.9798E | 3.126E- | 2.1353E |    |
| 1271   | negative regulation of cellular component movement                       | 0      | 210    | -09     | 07      | -07     | 55 |
| GO:002 |                                                                          | 24/171 | 81/232 | 2.1216E | 3.2617E | 2.228E- |    |
| 2904   | respiratory electron transport chain                                     | 0      | 10     | -09     | -07     | 07      | 24 |
| GO:005 | positive regulation of cytoskeleton organization                         | 43/171 | 218/23 | 2.4309E | 3.6414E | 2.4873E | 43 |

|        |                                                       |        |        |         |         |         |    |
|--------|-------------------------------------------------------|--------|--------|---------|---------|---------|----|
| 1495   |                                                       | 0      | 210    | -09     | -07     | -07     |    |
| GO:000 |                                                       | 50/171 | 276/23 | 2.6755E | 3.9076E | 2.6692E |    |
| 9161   | ribonucleoside monophosphate metabolic process        | 0      | 210    | -09     | -07     | -07     | 50 |
| GO:001 |                                                       | 29/171 | 116/23 | 3.7776E | 5.3826E | 3.6767E |    |
| 0927   | cellular component assembly involved in morphogenesis | 0      | 210    | -09     | -07     | -07     | 29 |
| GO:005 |                                                       | 55/171 | 322/23 | 3.9716E | 5.5244E | 3.7736E |    |
| 1235   | maintenance of location                               | 0      | 210    | -09     | -07     | -07     | 55 |
| GO:000 |                                                       | 56/171 | 331/23 | 4.1024E | 5.5735E | 3.8071E |    |
| 6732   | coenzyme metabolic process                            | 0      | 210    | -09     | -07     | -07     | 56 |
| GO:004 |                                                       | 56/171 | 332/23 | 4.5878E | 6.0487E | 4.1317E |    |
| 0013   | negative regulation of locomotion                     | 0      | 210    | -09     | -07     | -07     | 56 |
| GO:000 |                                                       | 49/171 | 272/23 | 4.6592E | 6.0487E | 4.1317E |    |
| 9167   | purine ribonucleoside monophosphate metabolic process | 0      | 210    | -09     | -07     | -07     | 49 |
| GO:000 |                                                       | 49/171 | 273/23 | 5.2796E | 6.7051E | 4.5801E |    |
| 9126   | purine nucleoside monophosphate metabolic process     | 0      | 210    | -09     | -07     | -07     | 49 |
| GO:003 |                                                       | 48/171 | 268/23 | 8.0981E | 1.0066E | 6.8757E |    |
| 0336   | negative regulation of cell migration                 | 0      | 210    | -09     | -06     | -07     | 48 |
| GO:007 |                                                       | 45/171 | 244/23 | 9.3343E | 1.1361E | 7.7602E |    |
| 1375   | cellular response to peptide hormone stimulus         | 0      | 210    | -09     | -06     | -07     | 45 |
| GO:190 |                                                       | 50/171 | 287/23 | 1.0279E | 1.2091E | 8.2592E |    |
| 1653   | cellular response to peptide                          | 0      | 210    | -08     | -06     | -07     | 50 |
| GO:003 |                                                       | 40/171 | 204/23 | 1.0348E | 1.2091E | 8.2592E |    |
| 1032   | actomyosin structure organization                     | 0      | 210    | -08     | -06     | -07     | 40 |
| GO:005 |                                                       | 24/171 | 88/232 | 1.3107E | 1.5014E | 1.0255E |    |
| 1149   | positive regulation of muscle cell differentiation    | 0      | 10     | -08     | -06     | -06     | 24 |
| GO:190 | nucleoside phosphate biosynthetic process             | 50/171 | 291/23 | 1.6399E | 1.8423E | 1.2585E | 50 |

|        |                                                      |        |        |         |         |         |    |
|--------|------------------------------------------------------|--------|--------|---------|---------|---------|----|
| 1293   |                                                      | 0      | 210    | -08     | -06     | -06     |    |
| GO:000 |                                                      | 49/171 | 285/23 | 2.2276E | 2.4428E | 1.6686E |    |
| 9165   | nucleotide biosynthetic process                      | 0      | 210    | -08     | -06     | -06     | 49 |
| GO:007 |                                                      | 59/171 | 374/23 | 2.258E- | 2.4428E | 1.6686E |    |
| 2594   | establishment of protein localization to organelle   | 0      | 210    | 08      | -06     | -06     | 59 |
| GO:190 |                                                      | 37/171 | 186/23 | 2.4531E | 2.6056E | 1.7798E |    |
| 5475   | regulation of protein localization to membrane       | 0      | 210    | -08     | -06     | -06     | 37 |
| GO:000 |                                                      | 59/171 | 376/23 | 2.7471E | 2.8658E | 1.9575E |    |
| 6631   | fatty acid metabolic process                         | 0      | 210    | -08     | -06     | -06     | 59 |
| GO:190 |                                                      | 50/171 | 297/23 | 3.2354E | 3.2798E | 2.2404E |    |
| 3829   | positive regulation of cellular protein localization | 0      | 210    | -08     | -06     | -06     | 50 |
| GO:000 |                                                      | 64/171 | 424/23 | 3.2562E | 3.2798E | 2.2404E |    |
| 7517   | muscle organ development                             | 0      | 210    | -08     | -06     | -06     | 64 |
| GO:000 |                                                      | 47/171 | 272/23 | 3.6589E | 3.6229E | 2.4747E |    |
| 6790   | sulfur compound metabolic process                    | 0      | 210    | -08     | -06     | -06     | 47 |
| GO:004 |                                                      | 19/171 | 61/232 | 4.0419E | 3.9354E | 2.6882E |    |
| 2773   | ATP synthesis coupled electron transport             | 0      | 10     | -08     | -06     | -06     | 19 |
| GO:004 |                                                      | 15/171 | 39/232 | 4.4468E | 4.2587E | 2.909E- |    |
| 3001   | Golgi to plasma membrane protein transport           | 0      | 10     | -08     | -06     | 06      | 15 |
| GO:003 |                                                      | 40/171 | 215/23 | 4.7604E | 4.4856E | 3.064E- |    |
| 2271   | regulation of protein polymerization                 | 0      | 210    | -08     | -06     | 06      | 40 |
| GO:003 |                                                      | 42/171 | 233/23 | 5.6562E | 5.245E- | 3.5827E |    |
| 4764   | positive regulation of transmembrane transport       | 0      | 210    | -08     | 06      | -06     | 42 |
| GO:001 |                                                      | 63/171 | 421/23 | 5.7635E | 5.261E- | 3.5937E |    |
| 0959   | regulation of metal ion transport                    | 0      | 210    | -08     | 06      | -06     | 63 |
| GO:000 | actin polymerization or depolymerization             | 38/171 | 201/23 | 6.598E- | 5.9301E | 4.0507E | 38 |

|        |                                                                  |        |        |         |         |         |    |
|--------|------------------------------------------------------------------|--------|--------|---------|---------|---------|----|
| 8154   |                                                                  | 0      | 210    | 08      | -06     | -06     |    |
| GO:200 |                                                                  | 26/171 | 109/23 | 6.7018E | 5.9321E | 4.0521E |    |
| 0379   | positive regulation of reactive oxygen species metabolic process | 0      | 210    | -08     | -06     | -06     | 26 |
| GO:004 |                                                                  | 22/171 | 82/232 | 7.2227E | 6.2065E | 4.2395E |    |
| 8747   | muscle fiber development                                         | 0      | 10     | -08     | -06     | -06     | 22 |
| GO:004 |                                                                  | 18/171 | 57/232 | 7.2243E | 6.2065E | 4.2395E |    |
| 2775   | mitochondrial ATP synthesis coupled electron transport           | 0      | 10     | -08     | -06     | -06     | 18 |
| GO:007 |                                                                  | 47/171 | 279/23 | 8.123E- | 6.8774E | 4.6978E |    |
| 2659   | protein localization to plasma membrane                          | 0      | 210    | 08      | -06     | -06     | 47 |
| GO:190 |                                                                  | 37/171 | 195/23 | 8.8724E | 7.4047E | 5.0579E |    |
| 2905   | positive regulation of supramolecular fiber organization         | 0      | 210    | -08     | -06     | -06     | 37 |
| GO:004 |                                                                  | 56/171 | 362/23 | 1.0075E | 8.2901E | 5.6628E |    |
| 6394   | carboxylic acid biosynthetic process                             | 0      | 210    | -07     | -06     | -06     | 56 |
| GO:199 |                                                                  | 54/171 | 344/23 | 1.0401E | 8.4308E | 5.7589E |    |
| 0778   | protein localization to cell periphery                           | 0      | 210    | -07     | -06     | -06     | 54 |
| GO:000 |                                                                  | 70/171 | 495/23 | 1.0535E | 8.4308E | 5.7589E |    |
| 9611   | response to wounding                                             | 0      | 210    | -07     | -06     | -06     | 70 |
| GO:001 |                                                                  | 56/171 | 363/23 | 1.1076E | 8.7441E | 5.9729E |    |
| 6053   | organic acid biosynthetic process                                | 0      | 210    | -07     | -06     | -06     | 56 |
| GO:003 |                                                                  | 40/171 | 222/23 | 1.1753E | 9.0881E | 6.2079E |    |
| 0323   | respiratory tube development                                     | 0      | 210    | -07     | -06     | -06     | 40 |
| GO:009 |                                                                  | 42/171 | 239/23 | 1.1823E | 9.0881E | 6.2079E |    |
| 0257   | regulation of muscle system process                              | 0      | 210    | -07     | -06     | -06     | 42 |
| GO:003 |                                                                  | 34/171 | 174/23 | 1.4026E | 1.057E- | 7.2203E |    |
| 0041   | actin filament polymerization                                    | 0      | 210    | -07     | 05      | -06     | 34 |
| GO:001 | regulation of lipid metabolic process                            | 53/171 | 338/23 | 1.4113E | 1.057E- | 7.2203E | 53 |



|        |                                                                                |        |        |         |         |         |    |
|--------|--------------------------------------------------------------------------------|--------|--------|---------|---------|---------|----|
| 9216   |                                                                                | 0      | 210    | -07     | 05      | -06     |    |
| GO:004 |                                                                                | 65/171 | 451/23 | 1.4821E | 1.0868E | 7.4239E |    |
| 3254   | regulation of protein complex assembly                                         | 0      | 210    | -07     | -05     | -06     | 65 |
| GO:005 |                                                                                | 30/171 | 143/23 | 1.4883E | 1.0868E | 7.4239E |    |
| 5007   | cardiac muscle cell differentiation                                            | 0      | 210    | -07     | -05     | -06     | 30 |
| GO:009 | regulation of transmembrane receptor protein serine/threonine kinase signaling | 41/171 | 233/23 | 1.6039E | 1.1568E | 7.9019E |    |
| 0092   | pathway                                                                        | 0      | 210    | -07     | -05     | -06     | 41 |
| GO:000 |                                                                                | 34/171 | 176/23 | 1.8668E | 1.33E-0 | 9.085E- |    |
| 8064   | regulation of actin polymerization or depolymerization                         | 0      | 210    | -07     | 5       | 06      | 34 |
| GO:003 |                                                                                | 59/171 | 397/23 | 1.9192E | 1.3429E | 9.1727E |    |
| 2535   | regulation of cellular component size                                          | 0      | 210    | -07     | -05     | -06     | 59 |
| GO:005 |                                                                                | 20/171 | 73/232 | 1.9308E | 1.3429E | 9.1727E |    |
| 1155   | positive regulation of striated muscle cell differentiation                    | 0      | 10     | -07     | -05     | -06     | 20 |
| GO:000 |                                                                                | 34/171 | 177/23 | 2.1494E | 1.4773E | 1.0091E |    |
| 6733   | oxidoreduction coenzyme metabolic process                                      | 0      | 210    | -07     | -05     | -05     | 34 |
| GO:003 |                                                                                | 39/171 | 219/23 | 2.3119E | 1.5563E | 1.0631E |    |
| 0324   | lung development                                                               | 0      | 210    | -07     | -05     | -05     | 39 |
| GO:003 |                                                                                | 45/171 | 271/23 | 2.3298E | 1.5563E | 1.0631E |    |
| 0198   | extracellular matrix organization                                              | 0      | 210    | -07     | -05     | -05     | 45 |
| GO:000 |                                                                                | 36/171 | 194/23 | 2.3443E | 1.5563E | 1.0631E |    |
| 9108   | coenzyme biosynthetic process                                                  | 0      | 210    | -07     | -05     | -05     | 36 |
| GO:003 |                                                                                | 34/171 | 179/23 | 2.838E- | 1.8629E | 1.2725E |    |
| 0832   | regulation of actin filament length                                            | 0      | 210    | 07      | -05     | -05     | 34 |
| GO:000 |                                                                                | 39/171 | 221/23 | 2.9514E | 1.9158E | 1.3086E |    |
| 3015   | heart process                                                                  | 0      | 210    | -07     | -05     | -05     | 39 |
| GO:004 | muscle adaptation                                                              | 26/171 | 117/23 | 3.0247E | 1.9418E | 1.3264E | 26 |

|        |                                                         |        |        |         |         |         |    |
|--------|---------------------------------------------------------|--------|--------|---------|---------|---------|----|
| 3500   |                                                         | 0      | 210    | -07     | -05     | -05     |    |
| GO:014 |                                                         | 24/171 | 103/23 | 3.3809E | 2.1469E | 1.4665E |    |
| 0053   | mitochondrial gene expression                           | 0      | 210    | -07     | -05     | -05     | 24 |
| GO:200 |                                                         | 18/171 | 63/232 | 3.9357E | 2.4723E | 1.6888E |    |
| 1169   | regulation of ATP biosynthetic process                  | 0      | 10     | -07     | -05     | -05     | 18 |
| GO:003 |                                                         | 34/171 | 182/23 | 4.2644E | 2.627E- | 1.7944E |    |
| 5051   | cardiocyte differentiation                              | 0      | 210    | -07     | 05      | -05     | 34 |
| GO:004 |                                                         | 50/171 | 322/23 | 4.2719E | 2.627E- | 1.7944E |    |
| 3270   | positive regulation of ion transport                    | 0      | 210    | -07     | 05      | -05     | 50 |
| GO:004 |                                                         | 54/171 | 360/23 | 4.6421E | 2.8249E | 1.9296E |    |
| 2060   | wound healing                                           | 0      | 210    | -07     | -05     | -05     | 54 |
| GO:003 |                                                         | 39/171 | 225/23 | 4.7554E | 2.8596E | 1.9533E |    |
| 2868   | response to insulin                                     | 0      | 210    | -07     | -05     | -05     | 39 |
| GO:004 |                                                         | 43/171 | 260/23 | 4.7969E | 2.8596E | 1.9533E |    |
| 8738   | cardiac muscle tissue development                       | 0      | 210    | -07     | -05     | -05     | 43 |
| GO:200 |                                                         | 36/171 | 200/23 | 5.0784E | 2.9967E | 2.047E- |    |
| 0377   | regulation of reactive oxygen species metabolic process | 0      | 210    | -07     | -05     | 05      | 36 |
| GO:004 |                                                         | 48/171 | 307/23 | 5.8848E | 3.4379E | 2.3483E |    |
| 5765   | regulation of angiogenesis                              | 0      | 210    | -07     | -05     | -05     | 48 |
| GO:003 |                                                         | 56/171 | 382/23 | 6.1094E | 3.5338E | 2.4139E |    |
| 4248   | regulation of cellular amide metabolic process          | 0      | 210    | -07     | -05     | -05     | 56 |
| GO:003 |                                                         | 37/171 | 211/23 | 6.9148E | 3.922E- | 2.679E- |    |
| 0595   | leukocyte chemotaxis                                    | 0      | 210    | -07     | 05      | 05      | 37 |
| GO:006 |                                                         | 37/171 | 211/23 | 6.9148E | 3.922E- | 2.679E- |    |
| 0047   | heart contraction                                       | 0      | 210    | -07     | 05      | 05      | 37 |
| GO:000 | urogenital system development                           | 52/171 | 346/23 | 7.0885E | 3.9819E | 2.7199E | 52 |

|        |                                                               |        |        |         |         |         |    |
|--------|---------------------------------------------------------------|--------|--------|---------|---------|---------|----|
| 1655   |                                                               | 0      | 210    | -07     | -05     | -05     |    |
| GO:004 |                                                               | 40/171 | 238/23 | 7.7814E | 4.3294E | 2.9573E |    |
| 5444   | fat cell differentiation                                      | 0      | 210    | -07     | -05     | -05     | 40 |
| GO:007 |                                                               | 36/171 | 204/23 | 8.3181E | 4.5844E | 3.1315E |    |
| 1560   | cellular response to transforming growth factor beta stimulus | 0      | 210    | -07     | -05     | -05     | 36 |
| GO:190 |                                                               | 33/171 | 179/23 | 8.561E- | 4.6741E | 3.1928E |    |
| 3034   | regulation of response to wounding                            | 0      | 210    | 07      | -05     | -05     | 33 |
| GO:190 |                                                               | 63/171 | 454/23 | 8.7646E | 4.741E- | 3.2385E |    |
| 4951   | positive regulation of establishment of protein localization  | 0      | 210    | -07     | 05      | -05     | 63 |
| GO:000 |                                                               | 58/171 | 406/23 | 9.1684E | 4.9139E | 3.3566E |    |
| 1667   | ameboidal-type cell migration                                 | 0      | 210    | -07     | -05     | -05     | 58 |
| GO:001 |                                                               | 56/171 | 387/23 | 9.3154E | 4.9473E | 3.3794E |    |
| 0721   | negative regulation of cell development                       | 0      | 210    | -07     | -05     | -05     | 56 |
| GO:000 |                                                               | 40/171 | 240/23 | 9.7006E | 5.0788E | 3.4692E |    |
| 6164   | purine nucleotide biosynthetic process                        | 0      | 210    | -07     | -05     | -05     | 40 |
| GO:006 |                                                               | 53/171 | 359/23 | 9.7368E | 5.0788E | 3.4692E |    |
| 2012   | regulation of small molecule metabolic process                | 0      | 210    | -07     | -05     | -05     | 53 |
| GO:001 |                                                               | 26/171 | 124/23 | 9.9527E | 5.1454E | 3.5147E |    |
| 4902   | myotube differentiation                                       | 0      | 210    | -07     | -05     | -05     | 26 |
| GO:190 |                                                               | 51/171 | 341/23 | 1.0475E | 5.3682E | 3.6669E |    |
| 1342   | regulation of vasculature development                         | 0      | 210    | -06     | -05     | -05     | 51 |
| GO:000 |                                                               | 39/171 | 232/23 | 1.0579E | 5.3741E | 3.6709E |    |
| 9260   | ribonucleotide biosynthetic process                           | 0      | 210    | -06     | -05     | -05     | 39 |
| GO:004 |                                                               | 49/171 | 323/23 | 1.1144E | 5.5642E | 3.8007E |    |
| 2063   | gliogenesis                                                   | 0      | 210    | -06     | -05     | -05     | 49 |
| GO:007 | ERK1 and ERK2 cascade                                         | 49/171 | 323/23 | 1.1144E | 5.5642E | 3.8007E | 49 |

|        |                                                              |        |        |         |         |         |    |
|--------|--------------------------------------------------------------|--------|--------|---------|---------|---------|----|
| 0371   |                                                              | 0      | 210    | -06     | -05     | -05     |    |
| GO:006 |                                                              | 55/171 | 380/23 | 1.153E- | 5.7082E | 3.8991E |    |
| 0562   | epithelial tube morphogenesis                                | 0      | 210    | 06      | -05     | -05     | 55 |
| GO:009 |                                                              | 36/171 | 207/23 | 1.1912E | 5.848E- | 3.9946E |    |
| 7529   | myeloid leukocyte migration                                  | 0      | 210    | -06     | 05      | -05     | 36 |
| GO:007 |                                                              | 47/171 | 306/23 | 1.2854E | 6.2108E | 4.2424E |    |
| 0372   | regulation of ERK1 and ERK2 cascade                          | 0      | 210    | -06     | -05     | -05     | 47 |
| GO:001 |                                                              | 38/171 | 225/23 | 1.2864E | 6.2108E | 4.2424E |    |
| 0632   | regulation of epithelial cell migration                      | 0      | 210    | -06     | -05     | -05     | 38 |
| GO:004 |                                                              | 16/171 | 55/232 | 1.3237E | 6.3387E | 4.3298E |    |
| 3470   | regulation of carbohydrate catabolic process                 | 0      | 10     | -06     | -05     | -05     | 16 |
| GO:007 |                                                              | 36/171 | 208/23 | 1.34E-0 | 6.3644E | 4.3474E |    |
| 1559   | response to transforming growth factor beta                  | 0      | 210    | 6       | -05     | -05     | 36 |
| GO:200 |                                                              | 12/171 | 32/232 | 1.3831E | 6.5161E | 4.451E- |    |
| 1171   | positive regulation of ATP biosynthetic process              | 0      | 10     | -06     | -05     | 05      | 12 |
| GO:003 |                                                              | 19/171 | 75/232 | 1.442E- | 6.7394E | 4.6035E |    |
| 2543   | mitochondrial translation                                    | 0      | 10     | 06      | -05     | -05     | 19 |
| GO:006 |                                                              | 17/171 | 62/232 | 1.5566E | 7.2172E | 4.9299E |    |
| 1951   | establishment of protein localization to plasma membrane     | 0      | 10     | -06     | -05     | -05     | 17 |
| GO:004 |                                                              | 26/171 | 127/23 | 1.6052E | 7.3461E | 5.0179E |    |
| 3467   | regulation of generation of precursor metabolites and energy | 0      | 210    | -06     | -05     | -05     | 26 |
| GO:003 |                                                              | 30/171 | 159/23 | 1.6095E | 7.3461E | 5.0179E |    |
| 0833   | regulation of actin filament polymerization                  | 0      | 210    | -06     | -05     | -05     | 30 |
| GO:007 |                                                              | 40/171 | 245/23 | 1.6594E | 7.5148E | 5.1332E |    |
| 2522   | purine-containing compound biosynthetic process              | 0      | 210    | -06     | -05     | -05     | 40 |
| GO:003 | cellular response to insulin stimulus                        | 34/171 | 193/23 | 1.7291E | 7.7654E | 5.3044E | 34 |

|        |                                                          |        |        |         |         |         |    |
|--------|----------------------------------------------------------|--------|--------|---------|---------|---------|----|
| 2869   |                                                          | 0      | 210    | -06     | -05     | -05     |    |
| GO:005 |                                                          | 46/171 | 300/23 | 1.7413E | 7.7654E | 5.3044E |    |
| 1604   | protein maturation                                       | 0      | 210    | -06     | -05     | -05     | 46 |
| GO:001 |                                                          | 48/171 | 319/23 | 1.8075E | 7.986E- | 5.455E- |    |
| 8108   | peptidyl-tyrosine phosphorylation                        | 0      | 210    | -06     | 05      | 05      | 48 |
| GO:000 |                                                          | 30/171 | 160/23 | 1.8433E | 7.986E- | 5.455E- |    |
| 9142   | nucleoside triphosphate biosynthetic process             | 0      | 210    | -06     | 05      | 05      | 30 |
| GO:001 |                                                          | 30/171 | 160/23 | 1.8433E | 7.986E- | 5.455E- |    |
| 9362   | pyridine nucleotide metabolic process                    | 0      | 210    | -06     | 05      | 05      | 30 |
| GO:007 |                                                          | 42/171 | 264/23 | 1.8454E | 7.986E- | 5.455E- |    |
| 2330   | monocarboxylic acid biosynthetic process                 | 0      | 210    | -06     | 05      | 05      | 42 |
| GO:005 |                                                          | 52/171 | 358/23 | 2.0103E | 8.5867E | 5.8654E |    |
| 0678   | regulation of epithelial cell proliferation              | 0      | 210    | -06     | -05     | -05     | 52 |
| GO:001 |                                                          | 22/171 | 98/232 | 2.0137E | 8.5867E | 5.8654E |    |
| 9395   | fatty acid oxidation                                     | 0      | 10     | -06     | -05     | -05     | 22 |
| GO:000 |                                                          | 33/171 | 186/23 | 2.0776E | 8.795E- | 6.0076E |    |
| 6109   | regulation of carbohydrate metabolic process             | 0      | 210    | -06     | 05      | -05     | 33 |
| GO:005 |                                                          | 34/171 | 195/23 | 2.1976E | 9.2364E | 6.3091E |    |
| 0731   | positive regulation of peptidyl-tyrosine phosphorylation | 0      | 210    | -06     | -05     | -05     | 34 |
| GO:004 |                                                          | 39/171 | 239/23 | 2.256E- | 9.414E- | 6.4305E |    |
| 6390   | ribose phosphate biosynthetic process                    | 0      | 210    | 06      | 05      | -05     | 39 |
| GO:001 |                                                          | 48/171 | 322/23 | 2.3628E | 9.7899E | 6.6872E |    |
| 8212   | peptidyl-tyrosine modification                           | 0      | 210    | -06     | -05     | -05     | 48 |
| GO:000 |                                                          | 37/171 | 223/23 | 2.7201E | 0.00011 | 7.6442E |    |
| 9152   | purine ribonucleotide biosynthetic process               | 0      | 210    | -06     | 191     | -05     | 37 |
| GO:190 | positive regulation of cation transmembrane transport    | 30/171 | 163/23 | 2.7451E | 0.00011 | 7.6605E | 30 |

|        |                                                            |        |        |         |         |         |    |
|--------|------------------------------------------------------------|--------|--------|---------|---------|---------|----|
| 4064   |                                                            | 0      | 210    | -06     | 215     | -05     |    |
| GO:005 |                                                            | 29/171 | 155/23 | 2.8444E | 0.00011 | 7.8824E |    |
| 1896   | regulation of protein kinase B signaling                   | 0      | 210    | -06     | 54      | -05     | 29 |
| GO:003 |                                                            | 22/171 | 100/23 | 2.8777E | 0.00011 | 7.9196E |    |
| 4440   | lipid oxidation                                            | 0      | 210    | -06     | 594     | -05     | 22 |
| GO:006 |                                                            | 40/171 | 251/23 | 3.0793E | 0.00012 | 8.4165E |    |
| 0541   | respiratory system development                             | 0      | 210    | -06     | 322     | -05     | 40 |
| GO:000 |                                                            | 17/171 | 65/232 | 3.1803E | 0.00012 | 8.5556E |    |
| 6893   | Golgi to plasma membrane transport                         | 0      | 10     | -06     | 525     | -05     | 17 |
| GO:015 |                                                            | 17/171 | 65/232 | 3.1803E | 0.00012 | 8.5556E |    |
| 0076   | neuroinflammatory response                                 | 0      | 10     | -06     | 525     | -05     | 17 |
| GO:007 |                                                            | 44/171 | 288/23 | 3.1945E | 0.00012 | 8.5556E |    |
| 2593   | reactive oxygen species metabolic process                  | 0      | 210    | -06     | 525     | -05     | 44 |
| GO:004 |                                                            | 61/171 | 452/23 | 3.2651E | 0.00012 | 8.6863E |    |
| 2326   | negative regulation of phosphorylation                     | 0      | 210    | -06     | 716     | -05     | 61 |
| GO:000 |                                                            | 14/171 | 46/232 | 3.3396E | 0.00012 | 8.7677E |    |
| 6110   | regulation of glycolytic process                           | 0      | 10     | -06     | 836     | -05     | 14 |
| GO:003 |                                                            | 14/171 | 46/232 | 3.3396E | 0.00012 | 8.7677E |    |
| 0811   | regulation of nucleotide catabolic process                 | 0      | 10     | -06     | 836     | -05     | 14 |
| GO:001 |                                                            | 54/171 | 384/23 | 3.4768E | 0.00013 | 9.0682E |    |
| 0256   | endomembrane system organization                           | 0      | 210    | -06     | 276     | -05     | 54 |
| GO:000 |                                                            | 30/171 | 165/23 | 3.5555E | 0.00013 | 9.1537E |    |
| 7179   | transforming growth factor beta receptor signaling pathway | 0      | 210    | -06     | 401     | -05     | 30 |
| GO:007 |                                                            | 30/171 | 165/23 | 3.5555E | 0.00013 | 9.1537E |    |
| 2524   | pyridine-containing compound metabolic process             | 0      | 210    | -06     | 401     | -05     | 30 |
| GO:004 | phosphatidylinositol-mediated signaling                    | 29/171 | 157/23 | 3.7111E | 0.00013 | 9.4931E | 29 |

|        |                                                      |        |        |         |         |         |    |
|--------|------------------------------------------------------|--------|--------|---------|---------|---------|----|
| 8015   |                                                      | 0      | 210    | -06     | 898     | -05     |    |
| GO:003 |                                                      | 58/171 | 425/23 | 3.9871E | 0.00014 | 0.00010 |    |
| 4655   | nucleobase-containing compound catabolic process     | 0      | 210    | -06     | 742     | 07      | 58 |
| GO:005 |                                                      | 58/171 | 425/23 | 3.9871E | 0.00014 | 0.00010 |    |
| 0673   | epithelial cell proliferation                        | 0      | 210    | -06     | 742     | 07      | 58 |
| GO:003 |                                                      | 42/171 | 272/23 | 4.0291E | 0.00014 | 0.00010 |    |
| 4504   | protein localization to nucleus                      | 0      | 210    | -06     | 804     | 112     | 42 |
| GO:005 |                                                      | 22/171 | 102/23 | 4.067E- | 0.00014 | 0.00010 |    |
| 1897   | positive regulation of protein kinase B signaling    | 0      | 210    | 06      | 843     | 139     | 22 |
| GO:005 |                                                      | 41/171 | 263/23 |         | 0.00014 | 0.00010 |    |
| 0730   | regulation of peptidyl-tyrosine phosphorylation      | 0      | 210    | 4.1E-06 | 843     | 139     | 41 |
| GO:000 |                                                      | 18/171 | 73/232 | 4.1159E | 0.00014 | 0.00010 |    |
| 9060   | aerobic respiration                                  | 0      | 10     | -06     | 843     | 139     | 18 |
| GO:004 |                                                      | 29/171 | 158/23 | 4.2299E | 0.00015 | 0.00010 |    |
| 6496   | nicotinamide nucleotide metabolic process            | 0      | 210    | -06     | 16      | 355     | 29 |
| GO:004 |                                                      | 64/171 | 486/23 | 4.3066E | 0.00015 | 0.00010 |    |
| 8871   | multicellular organismal homeostasis                 | 0      | 210    | -06     | 341     | 479     | 64 |
| GO:000 |                                                      | 28/171 | 150/23 | 4.39E-0 | 0.00015 | 0.00010 |    |
| 8360   | regulation of cell shape                             | 0      | 210    | 6       | 543     | 617     | 28 |
| GO:190 |                                                      | 26/171 | 134/23 | 4.5727E | 0.00016 | 0.00010 |    |
| 4375   | regulation of protein localization to cell periphery | 0      | 210    | -06     | 024     | 946     | 26 |
| GO:003 |                                                      | 40/171 | 255/23 | 4.5808E | 0.00016 | 0.00010 |    |
| 4330   | cell junction organization                           | 0      | 210    | -06     | 024     | 946     | 40 |
| GO:190 |                                                      | 50/171 | 349/23 | 4.6604E | 0.00016 | 0.00011 |    |
| 4062   | regulation of cation transmembrane transport         | 0      | 210    | -06     | 206     | 07      | 50 |
| GO:000 | endothelial cell proliferation                       | 27/171 | 143/23 | 5.1724E | 0.00017 | 0.00012 | 27 |

|        |                                                      |        |        |         |         |         |    |
|--------|------------------------------------------------------|--------|--------|---------|---------|---------|----|
| 1935   |                                                      | 0      | 210    | -06     | 832     | 181     |    |
| GO:000 |                                                      | 30/171 | 168/23 | 5.1891E | 0.00017 | 0.00012 |    |
| 9124   | nucleoside monophosphate biosynthetic process        | 0      | 210    | -06     | 832     | 181     | 30 |
| GO:004 |                                                      | 26/171 | 135/23 | 5.2716E | 0.00018 | 0.00012 |    |
| 5598   | regulation of fat cell differentiation               | 0      | 210    | -06     | 01      | 302     | 26 |
| GO:003 |                                                      | 42/171 | 275/23 | 5.3401E | 0.00018 | 0.00012 |    |
| 1647   | regulation of protein stability                      | 0      | 210    | -06     | 138     | 389     | 42 |
| GO:004 |                                                      | 29/171 | 160/23 | 5.4721E | 0.00018 | 0.00012 |    |
| 8017   | inositol lipid-mediated signaling                    | 0      | 210    | -06     | 479     | 622     | 29 |
| GO:000 |                                                      | 31/171 | 177/23 | 5.5099E | 0.00018 | 0.00012 |    |
| 8016   | regulation of heart contraction                      | 0      | 210    | -06     | 499     | 636     | 31 |
| GO:005 |                                                      | 51/171 | 361/23 | 5.6314E | 0.00018 | 0.00012 |    |
| 1961   | negative regulation of nervous system development    | 0      | 210    | -06     | 799     | 841     | 51 |
| GO:004 |                                                      | 22/171 | 104/23 | 5.6872E | 0.00018 | 0.00012 |    |
| 2136   | neurotransmitter biosynthetic process                | 0      | 210    | -06     | 878     | 895     | 22 |
| GO:004 |                                                      | 32/171 | 186/23 | 5.775E- | 0.00019 | 0.00013 |    |
| 3491   | protein kinase B signaling                           | 0      | 210    | 06      | 061     | 02      | 32 |
| GO:003 |                                                      | 18/171 | 75/232 | 6.2122E | 0.00020 | 0.00013 |    |
| 0808   | regulation of nucleotide biosynthetic process        | 0      | 10     | -06     | 051     | 696     | 18 |
| GO:004 |                                                      | 18/171 | 75/232 | 6.2122E | 0.00020 | 0.00013 |    |
| 6323   | glucose import                                       | 0      | 10     | -06     | 051     | 696     | 18 |
| GO:004 |                                                      | 18/171 | 75/232 | 6.2122E | 0.00020 | 0.00013 |    |
| 6626   | regulation of insulin receptor signaling pathway     | 0      | 10     | -06     | 051     | 696     | 18 |
| GO:190 |                                                      | 18/171 | 75/232 | 6.2122E | 0.00020 | 0.00013 |    |
| 0371   | regulation of purine nucleotide biosynthetic process | 0      | 10     | -06     | 051     | 696     | 18 |
| GO:000 | oxidative phosphorylation                            | 21/171 | 97/232 | 6.2817E | 0.00020 | 0.00013 | 21 |



|        |                                                        |        |        |         |         |         |    |
|--------|--------------------------------------------------------|--------|--------|---------|---------|---------|----|
| 6119   |                                                        | 0      | 10     | -06     | 053     | 698     |    |
| GO:004 |                                                        | 21/171 | 97/232 | 6.2817E | 0.00020 | 0.00013 |    |
| 3502   | regulation of muscle adaptation                        | 0      | 10     | -06     | 053     | 698     | 21 |
| GO:000 |                                                        | 28/171 | 153/23 | 6.5182E | 0.00020 | 0.00014 |    |
| 6457   | protein folding                                        | 0      | 210    | -06     | 695     | 136     | 28 |
| GO:190 |                                                        |        | 12/232 | 6.6253E | 0.00020 | 0.00014 |    |
| 0272   | negative regulation of long-term synaptic potentiation | 7/1710 | 10     | -06     | 841     | 236     | 7  |
| GO:004 |                                                        | 46/171 | 315/23 | 6.6355E | 0.00020 | 0.00014 |    |
| 3062   | extracellular structure organization                   | 0      | 210    | -06     | 841     | 236     | 46 |
| GO:000 |                                                        | 26/171 | 137/23 | 6.9698E | 0.00021 | 0.00014 |    |
| 6754   | ATP biosynthetic process                               | 0      | 210    | -06     | 537     | 712     | 26 |
| GO:007 |                                                        | 31/171 | 179/23 | 6.9868E | 0.00021 | 0.00014 |    |
| 1772   | response to BMP                                        | 0      | 210    | -06     | 537     | 712     | 31 |
| GO:007 |                                                        | 31/171 | 179/23 | 6.9868E | 0.00021 | 0.00014 |    |
| 1773   | cellular response to BMP stimulus                      | 0      | 210    | -06     | 537     | 712     | 31 |
| GO:005 |                                                        | 55/171 | 403/23 | 7.0069E | 0.00021 | 0.00014 |    |
| 1098   | regulation of binding                                  | 0      | 210    | -06     | 537     | 712     | 55 |
| GO:004 |                                                        | 61/171 | 463/23 | 7.0607E | 0.00021 | 0.00014 |    |
| 4270   | cellular nitrogen compound catabolic process           | 0      | 210    | -06     | 537     | 712     | 61 |
| GO:000 |                                                        | 25/171 | 129/23 | 7.0783E | 0.00021 | 0.00014 |    |
| 1936   | regulation of endothelial cell proliferation           | 0      | 210    | -06     | 537     | 712     | 25 |
| GO:000 |                                                        | 11/171 | 31/232 | 7.1554E | 0.00021 | 0.00014 |    |
| 6099   | tricarboxylic acid cycle                               | 0      | 10     | -06     | 659     | 795     | 11 |
| GO:000 |                                                        | 21/171 | 98/232 | 7.4457E | 0.00022 | 0.00015 |    |
| 7006   | mitochondrial membrane organization                    | 0      | 10     | -06     | 303     | 235     | 21 |
| GO:001 | regulation of muscle cell apoptotic process            | 21/171 | 98/232 | 7.4457E | 0.00022 | 0.00015 | 21 |

|        |                                                               |        |        |         |         |         |    |
|--------|---------------------------------------------------------------|--------|--------|---------|---------|---------|----|
| 0660   |                                                               | 0      | 10     | -06     | 303     | 235     |    |
| GO:000 |                                                               | 33/171 | 197/23 | 7.4827E | 0.00022 | 0.00015 |    |
| 7519   | skeletal muscle tissue development                            | 0      | 210    | -06     | 303     | 235     | 33 |
| GO:200 |                                                               | 56/171 | 414/23 | 7.5907E | 0.00022 | 0.00015 |    |
| 1233   | regulation of apoptotic signaling pathway                     | 0      | 210    | -06     | 51      | 376     | 56 |
| GO:001 |                                                               | 22/171 | 106/23 | 7.8726E | 0.00023 | 0.00015 |    |
| 4812   | muscle cell migration                                         | 0      | 210    | -06     | 212     | 855     | 22 |
| GO:000 |                                                               | 29/171 | 163/23 | 7.9704E | 0.00023 | 0.00015 |    |
| 9266   | response to temperature stimulus                              | 0      | 210    | -06     | 212     | 855     | 29 |
| GO:003 |                                                               | 12/171 | 37/232 | 8.0259E | 0.00023 | 0.00015 |    |
| 0810   | positive regulation of nucleotide biosynthetic process        | 0      | 10     | -06     | 212     | 855     | 12 |
| GO:007 |                                                               | 12/171 | 37/232 | 8.0259E | 0.00023 | 0.00015 |    |
| 2350   | tricarboxylic acid metabolic process                          | 0      | 10     | -06     | 212     | 855     | 12 |
| GO:190 |                                                               | 12/171 | 37/232 | 8.0259E | 0.00023 | 0.00015 |    |
| 0373   | positive regulation of purine nucleotide biosynthetic process | 0      | 10     | -06     | 212     | 855     | 12 |
| GO:000 |                                                               |        | 21/232 | 8.153E- | 0.00023 | 0.00015 |    |
| 6120   | mitochondrial electron transport, NADH to ubiquinone          | 9/1710 | 10     | 06      | 287     | 907     | 9  |
| GO:190 |                                                               | 20/171 | 91/232 | 8.154E- | 0.00023 | 0.00015 |    |
| 3578   | regulation of ATP metabolic process                           | 0      | 10     | 06      | 287     | 907     | 20 |
| GO:005 |                                                               | 58/171 | 435/23 | 8.1855E | 0.00023 | 0.00015 |    |
| 1222   | positive regulation of protein transport                      | 0      | 210    | -06     | 287     | 907     | 58 |
| GO:004 |                                                               | 45/171 | 308/23 | 8.2115E | 0.00023 | 0.00015 |    |
| 5927   | positive regulation of growth                                 | 0      | 210    | -06     | 287     | 907     | 45 |
| GO:005 |                                                               | 48/171 | 337/23 | 8.4027E | 0.00023 | 0.00016 |    |
| 0768   | negative regulation of neurogenesis                           | 0      | 210    | -06     | 702     | 19      | 48 |
| GO:003 | nucleobase-containing small molecule biosynthetic process     | 30/171 | 172/23 | 8.439E- | 0.00023 | 0.00016 | 30 |

|        |                                                              |        |        |         |         |         |    |
|--------|--------------------------------------------------------------|--------|--------|---------|---------|---------|----|
| 4404   |                                                              | 0      | 210    | 06      | 702     | 19      |    |
| GO:009 |                                                              | 41/171 | 271/23 | 8.6928E | 0.00024 | 0.00016 |    |
| 0287   | regulation of cellular response to growth factor stimulus    | 0      | 210    | -06     | 21      | 537     | 41 |
| GO:005 |                                                              | 15/171 | 56/232 | 8.7025E | 0.00024 | 0.00016 |    |
| 1196   | regulation of coenzyme metabolic process                     | 0      | 10     | -06     | 21      | 537     | 15 |
| GO:200 |                                                              | 19/171 | 84/232 | 8.7699E | 0.00024 | 0.00016 |    |
| 1057   | reactive nitrogen species metabolic process                  | 0      | 10     | -06     | 281     | 586     | 19 |
| GO:000 |                                                              | 23/171 | 115/23 | 9.4518E | 0.00026 | 0.00017 |    |
| 5976   | polysaccharide metabolic process                             | 0      | 210    | -06     | 046     | 791     | 23 |
| GO:005 |                                                              | 41/171 | 272/23 | 9.5206E | 0.00026 | 0.00017 |    |
| 1924   | regulation of calcium ion transport                          | 0      | 210    | -06     | 112     | 837     | 41 |
| GO:001 |                                                              | 20/171 | 92/232 | 9.7048E | 0.00026 | 0.00018 |    |
| 4909   | smooth muscle cell migration                                 | 0      | 10     | -06     | 493     | 097     | 20 |
| GO:000 |                                                              | 27/171 | 148/23 | 1.0045E | 0.00027 | 0.00018 |    |
| 9145   | purine nucleoside triphosphate biosynthetic process          | 0      | 210    | -05     | 169     | 559     | 27 |
| GO:190 |                                                              | 27/171 | 148/23 | 1.0045E | 0.00027 | 0.00018 |    |
| 1292   | nucleoside phosphate catabolic process                       | 0      | 210    | -05     | 169     | 559     | 27 |
| GO:005 |                                                              | 29/171 | 165/23 | 1.0174E | 0.00027 | 0.00018 |    |
| 1017   | actin filament bundle assembly                               | 0      | 210    | -05     | 278     | 633     | 29 |
| GO:000 |                                                              | 11/171 | 32/232 | 1.0179E | 0.00027 | 0.00018 |    |
| 6101   | citrate metabolic process                                    | 0      | 10     | -05     | 278     | 633     | 11 |
| GO:005 |                                                              | 21/171 | 100/23 | 1.0376E | 0.00027 | 0.00018 |    |
| 5013   | cardiac muscle cell development                              | 0      | 210    | -05     | 679     | 907     | 21 |
| GO:190 |                                                              | 34/171 | 209/23 | 1.0497E | 0.00027 | 0.00019 |    |
| 4950   | negative regulation of establishment of protein localization | 0      | 210    | -05     | 875     | 041     | 34 |
| GO:004 | heterocycle catabolic process                                | 61/171 | 469/23 | 1.0575E | 0.00027 | 0.00019 | 61 |

|        |                                          |        |        |         |         |         |    |
|--------|------------------------------------------|--------|--------|---------|---------|---------|----|
| 6700   |                                          | 0      | 210    | -05     | 955     | 095     |    |
| GO:001 |                                          | 28/171 | 157/23 | 1.0821E | 0.00028 | 0.00019 |    |
| 0594   | regulation of endothelial cell migration | 0      | 210    | -05     | 477     | 452     | 28 |
| GO:005 |                                          | 63/171 | 490/23 | 1.1022E | 0.00028 | 0.00019 |    |
| 0708   | regulation of protein secretion          | 0      | 210    | -05     | 874     | 723     | 63 |
| GO:000 |                                          | 18/171 | 78/232 | 1.1171E | 0.00028 | 0.00019 |    |
| 5977   | glycogen metabolic process               | 0      | 10     | -05     | 877     | 725     | 18 |
| GO:000 |                                          | 18/171 | 78/232 | 1.1171E | 0.00028 | 0.00019 |    |
| 6073   | cellular glucan metabolic process        | 0      | 10     | -05     | 877     | 725     | 18 |
| GO:004 |                                          | 18/171 | 78/232 | 1.1171E | 0.00028 | 0.00019 |    |
| 4042   | glucan metabolic process                 | 0      | 10     | -05     | 877     | 725     | 18 |
| GO:004 |                                          |        | 17/232 | 1.1354E | 0.00029 | 0.00019 |    |
| 8739   | cardiac muscle fiber development         | 8/1710 | 10     | -05     | 219     | 959     | 8  |
| GO:003 |                                          | 21/171 | 101/23 | 1.22E-0 | 0.00030 | 0.00021 |    |
| 1532   | actin cytoskeleton reorganization        | 0      | 210    | 5       | 958     | 146     | 21 |
| GO:000 |                                          | 47/171 | 332/23 | 1.2216E | 0.00030 | 0.00021 |    |
| 6417   | regulation of translation                | 0      | 210    | -05     | 958     | 146     | 47 |
| GO:000 |                                          | 28/171 | 158/23 | 1.2241E | 0.00030 | 0.00021 |    |
| 6941   | striated muscle contraction              | 0      | 210    | -05     | 958     | 146     | 28 |
| GO:000 |                                          | 28/171 | 158/23 | 1.2241E | 0.00030 | 0.00021 |    |
| 9755   | hormone-mediated signaling pathway       | 0      | 210    | -05     | 958     | 146     | 28 |
| GO:004 |                                          | 54/171 | 401/23 | 1.2465E | 0.00031 | 0.00021 |    |
| 8638   | regulation of developmental growth       | 0      | 210    | -05     | 17      | 291     | 54 |
| GO:000 |                                          | 43/171 | 294/23 | 1.2577E | 0.00031 | 0.00021 |    |
| 9895   | negative regulation of catabolic process | 0      | 210    | -05     | 17      | 291     | 43 |
| GO:007 | calcium ion import                       | 19/171 | 86/232 | 1.2582E | 0.00031 | 0.00021 | 19 |

|        |                                                       |        |        |         |         |         |    |
|--------|-------------------------------------------------------|--------|--------|---------|---------|---------|----|
| 0509   |                                                       | 0      | 10     | -05     | 17      | 291     |    |
| GO:001 |                                                       | 22/171 | 109/23 | 1.2592E | 0.00031 | 0.00021 |    |
| 9363   | pyridine nucleotide biosynthetic process              | 0      | 210    | -05     | 17      | 291     | 22 |
| GO:190 |                                                       | 22/171 | 109/23 | 1.2592E | 0.00031 | 0.00021 |    |
| 3076   | regulation of protein localization to plasma membrane | 0      | 210    | -05     | 17      | 291     | 22 |
| GO:001 |                                                       | 62/171 | 483/23 | 1.3568E | 0.00033 | 0.00022 |    |
| 9439   | aromatic compound catabolic process                   | 0      | 210    | -05     | 404     | 817     | 62 |
| GO:001 |                                                       | 26/171 | 142/23 | 1.3609E | 0.00033 | 0.00022 |    |
| 6052   | carbohydrate catabolic process                        | 0      | 210    | -05     | 404     | 817     | 26 |
| GO:001 |                                                       | 15/171 | 58/232 | 1.3848E | 0.00033 | 0.00023 |    |
| 0656   | negative regulation of muscle cell apoptotic process  | 0      | 10     | -05     | 82      | 101     | 15 |
| GO:001 |                                                       | 37/171 | 239/23 | 1.3894E | 0.00033 | 0.00023 |    |
| 0001   | glial cell differentiation                            | 0      | 210    | -05     | 82      | 101     | 37 |
| GO:190 |                                                       | 13/171 | 45/232 | 1.4069E | 0.00034 | 0.00023 |    |
| 3580   | positive regulation of ATP metabolic process          | 0      | 10     | -05     | 104     | 296     | 13 |
| GO:003 |                                                       | 29/171 | 168/23 | 1.4535E | 0.00034 | 0.00023 |    |
| 0509   | BMP signaling pathway                                 | 0      | 210    | -05     | 943     | 869     | 29 |
| GO:006 |                                                       | 29/171 | 168/23 | 1.4535E | 0.00034 | 0.00023 |    |
| 1572   | actin filament bundle organization                    | 0      | 210    | -05     | 943     | 869     | 29 |
| GO:000 |                                                       | 23/171 | 118/23 | 1.4715E | 0.00035 | 0.00024 |    |
| 6090   | pyruvate metabolic process                            | 0      | 210    | -05     | 231     | 065     | 23 |
| GO:000 |                                                       | 63/171 | 495/23 | 1.5171E | 0.00036 | 0.00024 |    |
| 3013   | circulatory system process                            | 0      | 210    | -05     | 175     | 71      | 63 |
| GO:004 |                                                       | 18/171 | 80/232 | 1.6208E | 0.00038 | 0.00026 |    |
| 6209   | nitric oxide metabolic process                        | 0      | 10     | -05     | 491     | 292     | 18 |
| GO:001 | muscle cell apoptotic process                         | 21/171 | 103/23 | 1.674E- | 0.00039 | 0.00026 | 21 |

|        |                                                            |        |        |         |         |         |    |
|--------|------------------------------------------------------------|--------|--------|---------|---------|---------|----|
| 0657   |                                                            | 0      | 210    | 05      | 276     | 828     |    |
| GO:003 |                                                            | 21/171 | 103/23 | 1.674E- | 0.00039 | 0.00026 |    |
| 2231   | regulation of actin filament bundle assembly               | 0      | 210    | 05      | 276     | 828     | 21 |
| GO:190 |                                                            | 21/171 | 103/23 | 1.674E- | 0.00039 | 0.00026 |    |
| 3426   | regulation of reactive oxygen species biosynthetic process | 0      | 210    | 05      | 276     | 828     | 21 |
| GO:009 |                                                            | 35/171 | 223/23 | 1.7386E | 0.00040 | 0.00027 |    |
| 0150   | establishment of protein localization to membrane          | 0      | 210    | -05     | 627     | 751     | 35 |
| GO:004 |                                                            | 34/171 | 214/23 | 1.7541E | 0.00040 | 0.00027 |    |
| 8639   | positive regulation of developmental growth                | 0      | 210    | -05     | 827     | 888     | 34 |
| GO:000 |                                                            | 52/171 | 386/23 | 1.7725E | 0.00040 | 0.00027 |    |
| 6914   | autophagy                                                  | 0      | 210    | -05     | 928     | 957     | 52 |
| GO:006 |                                                            | 52/171 | 386/23 | 1.7725E | 0.00040 | 0.00027 |    |
| 1919   | process utilizing autophagic mechanism                     | 0      | 210    | -05     | 928     | 957     | 52 |
| GO:009 |                                                            | 13/171 | 46/232 | 1.8296E | 0.00042 | 0.00028 |    |
| 0279   | regulation of calcium ion import                           | 0      | 10     | -05     | 08      | 744     | 13 |
| GO:000 |                                                            | 25/171 | 136/23 | 1.8433E | 0.00042 | 0.00028 |    |
| 9166   | nucleotide catabolic process                               | 0      | 210    | -05     | 097     | 755     | 25 |
| GO:000 |                                                            | 42/171 | 289/23 | 1.8447E | 0.00042 | 0.00028 |    |
| 6936   | muscle contraction                                         | 0      | 210    | -05     | 097     | 755     | 42 |
| GO:000 |                                                            | 30/171 | 179/23 | 1.8875E | 0.00042 | 0.00029 |    |
| 1659   | temperature homeostasis                                    | 0      | 210    | -05     | 739     | 194     | 30 |
| GO:003 |                                                            | 30/171 | 179/23 | 1.8875E | 0.00042 | 0.00029 |    |
| 4767   | positive regulation of ion transmembrane transport         | 0      | 210    | -05     | 739     | 194     | 30 |
| GO:006 |                                                            | 33/171 | 206/23 | 1.9481E | 0.00043 | 0.00029 |    |
| 0538   | skeletal muscle organ development                          | 0      | 210    | -05     | 898     | 985     | 33 |
| GO:004 | cellular polysaccharide metabolic process                  | 21/171 | 104/23 | 1.9537E | 0.00043 | 0.00029 | 21 |

|        |                                                         |        |        |         |         |         |    |
|--------|---------------------------------------------------------|--------|--------|---------|---------|---------|----|
| 4264   |                                                         | 0      | 210    | -05     | 898     | 985     |    |
| GO:000 |                                                         | 28/171 | 162/23 | 1.9779E | 0.00044 | 0.00030 |    |
| 9156   | ribonucleoside monophosphate biosynthetic process       | 0      | 210    | -05     | 272     | 241     | 28 |
| GO:003 |                                                         | 57/171 | 438/23 | 2.0004E | 0.00044 | 0.00030 |    |
| 2386   | regulation of intracellular transport                   | 0      | 210    | -05     | 603     | 467     | 57 |
| GO:006 |                                                         | 14/171 | 53/232 | 2.053E- | 0.00045 | 0.00031 |    |
| 1900   | glial cell activation                                   | 0      | 10     | 05      | 604     | 151     | 14 |
| GO:190 |                                                         | 19/171 | 89/232 | 2.1109E | 0.00046 | 0.00031 |    |
| 4035   | regulation of epithelial cell apoptotic process         | 0      | 10     | -05     | 711     | 907     | 19 |
| GO:000 |                                                         | 16/171 | 67/232 | 2.1497E | 0.00047 | 0.00032 |    |
| 6635   | fatty acid beta-oxidation                               | 0      | 10     | -05     | 391     | 371     | 16 |
| GO:000 |                                                         | 23/171 | 121/23 | 2.2496E | 0.00049 | 0.00033 |    |
| 8286   | insulin receptor signaling pathway                      | 0      | 210    | -05     | 221     | 621     | 23 |
| GO:000 |                                                         | 23/171 | 121/23 | 2.2496E | 0.00049 | 0.00033 |    |
| 9132   | nucleoside diphosphate metabolic process                | 0      | 210    | -05     | 221     | 621     | 23 |
| GO:005 |                                                         | 47/171 | 340/23 | 2.2781E | 0.00049 | 0.00033 |    |
| 0900   | leukocyte migration                                     | 0      | 210    | -05     | 553     | 848     | 47 |
| GO:007 |                                                         | 22/171 | 113/23 | 2.2817E | 0.00049 | 0.00033 |    |
| 2525   | pyridine-containing compound biosynthetic process       | 0      | 210    | -05     | 553     | 848     | 22 |
| GO:006 |                                                         | 27/171 | 155/23 | 2.3917E | 0.00051 | 0.00035 |    |
| 2013   | positive regulation of small molecule metabolic process | 0      | 210    | -05     | 749     | 349     | 27 |
| GO:007 |                                                         | 43/171 | 302/23 | 2.4453E | 0.00052 | 0.00036 |    |
| 2001   | renal system development                                | 0      | 210    | -05     | 714     | 008     | 43 |
| GO:007 |                                                         | 19/171 | 90/232 | 2.493E- | 0.00053 | 0.00036 |    |
| 2655   | establishment of protein localization to mitochondrion  | 0      | 10     | 05      | 544     | 575     | 19 |
| GO:000 | purine ribonucleoside triphosphate biosynthetic process | 26/171 | 147/23 | 2.5558E | 0.00054 | 0.00037 | 26 |

|        |                                                   |        |        |         |         |         |    |
|--------|---------------------------------------------------|--------|--------|---------|---------|---------|----|
| 9206   |                                                   | 0      | 210    | -05     | 691     | 358     |    |
| GO:001 |                                                   | 14/171 | 54/232 | 2.585E- | 0.00054 | 0.00037 |    |
| 4009   | glial cell proliferation                          | 0      | 10     | 05      | 915     | 511     | 14 |
| GO:004 |                                                   | 12/171 | 41/232 | 2.5957E | 0.00054 | 0.00037 |    |
| 6326   | positive regulation of glucose import             | 0      | 10     | -05     | 915     | 511     | 12 |
| GO:004 |                                                   | 20/171 | 98/232 | 2.5984E | 0.00054 | 0.00037 |    |
| 6031   | ADP metabolic process                             | 0      | 10     | -05     | 915     | 511     | 20 |
| GO:007 |                                                   | 34/171 | 218/23 | 2.6038E | 0.00054 | 0.00037 |    |
| 0374   | positive regulation of ERK1 and ERK2 cascade      | 0      | 210    | -05     | 915     | 511     | 34 |
| GO:004 |                                                   | 16/171 | 68/232 | 2.6206E | 0.00054 | 0.00037 |    |
| 5428   | regulation of nitric oxide biosynthetic process   | 0      | 10     | -05     | 929     | 52      | 16 |
| GO:200 |                                                   | 33/171 | 209/23 | 2.6354E | 0.00054 | 0.00037 |    |
| 0027   | regulation of animal organ morphogenesis          | 0      | 210    | -05     | 929     | 52      | 33 |
| GO:001 |                                                   | 21/171 | 106/23 | 2.6421E | 0.00054 | 0.00037 |    |
| 9359   | nicotinamide nucleotide biosynthetic process      | 0      | 210    | -05     | 929     | 52      | 21 |
| GO:005 |                                                   | 21/171 | 106/23 | 2.6421E | 0.00054 | 0.00037 |    |
| 5006   | cardiac cell development                          | 0      | 210    | -05     | 929     | 52      | 21 |
| GO:005 |                                                   | 11/171 | 35/232 | 2.6787E | 0.00055 | 0.00037 |    |
| 1084   | 'de novo' posttranslational protein folding       | 0      | 10     | -05     | 493     | 906     | 11 |
| GO:004 |                                                   | 41/171 | 284/23 | 2.7008E | 0.00055 | 0.00038 |    |
| 4262   | cellular carbohydrate metabolic process           | 0      | 210    | -05     | 753     | 084     | 41 |
| GO:000 |                                                   | 18/171 | 83/232 | 2.7586E | 0.00056 | 0.00038 |    |
| 6942   | regulation of striated muscle contraction         | 0      | 10     | -05     | 663     | 705     | 18 |
| GO:000 |                                                   | 61/171 | 484/23 | 2.7643E | 0.00056 | 0.00038 |    |
| 8015   | blood circulation                                 | 0      | 210    | -05     | 663     | 705     | 61 |
| GO:003 | negative regulation of cellular catabolic process | 37/171 | 247/23 | 2.9145E | 0.00059 | 0.00040 | 37 |



|        |                                                          |        |        |         |         |         |    |
|--------|----------------------------------------------------------|--------|--------|---------|---------|---------|----|
| 1330   |                                                          | 0      | 210    | -05     | 533     | 666     |    |
| GO:006 |                                                          | 41/171 | 285/23 | 2.9345E | 0.00059 | 0.00040 |    |
| 1448   | connective tissue development                            | 0      | 210    | -05     | 732     | 801     | 41 |
| GO:007 |                                                          | 23/171 | 123/23 | 2.9568E | 0.00059 | 0.00040 |    |
| 1621   | granulocyte chemotaxis                                   | 0      | 210    | -05     | 978     | 97      | 23 |
| GO:000 |                                                          | 17/171 | 76/232 | 2.997E- | 0.00060 | 0.00041 |    |
| 6809   | nitric oxide biosynthetic process                        | 0      | 10     | 05      | 583     | 382     | 17 |
| GO:000 |                                                          | 21/171 | 107/23 | 3.0619E | 0.00060 | 0.00041 |    |
| 3014   | renal system process                                     | 0      | 210    | -05     | 842     | 559     | 21 |
| GO:000 |                                                          | 21/171 | 107/23 | 3.0619E | 0.00060 | 0.00041 |    |
| 6140   | regulation of nucleotide metabolic process               | 0      | 210    | -05     | 842     | 559     | 21 |
| GO:000 |                                                          | 21/171 | 107/23 | 3.0619E | 0.00060 | 0.00041 |    |
| 9185   | ribonucleoside diphosphate metabolic process             | 0      | 210    | -05     | 842     | 559     | 21 |
| GO:001 |                                                          | 21/171 | 107/23 | 3.0619E | 0.00060 | 0.00041 |    |
| 4896   | muscle hypertrophy                                       | 0      | 210    | -05     | 842     | 559     | 21 |
| GO:004 |                                                          | 21/171 | 107/23 | 3.0619E | 0.00060 | 0.00041 |    |
| 8145   | regulation of fibroblast proliferation                   | 0      | 210    | -05     | 842     | 559     | 21 |
| GO:190 |                                                          | 36/171 | 239/23 | 3.2932E | 0.00065 | 0.00044 |    |
| 3522   | regulation of blood circulation                          | 0      | 210    | -05     | 216     | 548     | 36 |
| GO:000 |                                                          | 27/171 | 158/23 | 3.3983E | 0.00066 | 0.00045 |    |
| 9127   | purine nucleoside monophosphate biosynthetic process     | 0      | 210    | -05     | 845     | 66      | 27 |
| GO:000 |                                                          | 27/171 | 158/23 | 3.3983E | 0.00066 | 0.00045 |    |
| 9168   | purine ribonucleoside monophosphate biosynthetic process | 0      | 210    | -05     | 845     | 66      | 27 |
| GO:006 |                                                          | 25/171 | 141/23 | 3.4755E | 0.00068 | 0.00046 |    |
| 1041   | regulation of wound healing                              | 0      | 210    | -05     | 134     | 541     | 25 |
| GO:011 | regulation of actomyosin structure organization          | 20/171 | 100/23 | 3.5324E | 0.00068 | 0.00047 | 20 |

|        |                                                  |        |        |         |         |         |    |
|--------|--------------------------------------------------|--------|--------|---------|---------|---------|----|
| 0020   |                                                  | 0      | 210    | -05     | 944     | 094     |    |
| GO:003 |                                                  | 21/171 | 108/23 | 3.5404E | 0.00068 | 0.00047 |    |
| 0048   | actin filament-based movement                    | 0      | 210    | -05     | 944     | 094     | 21 |
| GO:200 |                                                  | 17/171 | 77/232 | 3.5848E | 0.00069 | 0.00047 |    |
| 1259   | positive regulation of cation channel activity   | 0      | 10     | -05     | 5       | 474     | 17 |
| GO:000 |                                                  | 11/171 | 36/232 | 3.6017E | 0.00069 | 0.00047 |    |
| 6458   | 'de novo' protein folding                        | 0      | 10     | -05     | 5       | 474     | 11 |
| GO:004 |                                                  | 36/171 | 240/23 | 3.6047E | 0.00069 | 0.00047 |    |
| 3393   | regulation of protein binding                    | 0      | 210    | -05     | 5       | 474     | 36 |
| GO:000 |                                                  | 26/171 | 150/23 | 3.6658E | 0.00070 | 0.00048 |    |
| 9201   | ribonucleoside triphosphate biosynthetic process | 0      | 210    | -05     | 446     | 12      | 26 |
| GO:001 |                                                  | 18/171 | 85/232 | 3.8681E | 0.00073 | 0.00050 |    |
| 4910   | regulation of smooth muscle cell migration       | 0      | 10     | -05     | 607     | 279     | 18 |
| GO:004 |                                                  | 18/171 | 85/232 | 3.8681E | 0.00073 | 0.00050 |    |
| 8708   | astrocyte differentiation                        | 0      | 10     | -05     | 607     | 279     | 18 |
| GO:190 |                                                  | 18/171 | 85/232 | 3.8681E | 0.00073 | 0.00050 |    |
| 1863   | positive regulation of muscle tissue development | 0      | 10     | -05     | 607     | 279     | 18 |
| GO:010 |                                                  | 25/171 | 142/23 | 3.9274E | 0.00074 | 0.00050 |    |
| 6106   | cold-induced thermogenesis                       | 0      | 210    | -05     | 251     | 719     | 25 |
| GO:012 |                                                  | 25/171 | 142/23 | 3.9274E | 0.00074 | 0.00050 |    |
| 0161   | regulation of cold-induced thermogenesis         | 0      | 210    | -05     | 251     | 719     | 25 |
| GO:005 |                                                  | 32/171 | 204/23 | 3.9548E | 0.00074 | 0.00050 |    |
| 1224   | negative regulation of protein transport         | 0      | 210    | -05     | 529     | 909     | 32 |
| GO:001 |                                                  | 15/171 | 63/232 | 4.0066E | 0.00075 | 0.00051 |    |
| 0830   | regulation of myotube differentiation            | 0      | 10     | -05     | 263     | 41      | 15 |
| GO:004 | fibroblast proliferation                         | 21/171 | 109/23 | 4.0848E | 0.00076 | 0.00052 | 21 |

|        |                                                     |        |        |         |         |         |    |
|--------|-----------------------------------------------------|--------|--------|---------|---------|---------|----|
| 8144   |                                                     | 0      | 210    | -05     | 486     | 246     |    |
| GO:000 |                                                     | 20/171 | 101/23 | 4.1034E | 0.00076 | 0.00052 |    |
| 3300   | cardiac muscle hypertrophy                          | 0      | 210    | -05     | 588     | 315     | 20 |
| GO:006 |                                                     | 42/171 | 299/23 | 4.1675E | 0.00077 | 0.00052 |    |
| 0326   | cell chemotaxis                                     | 0      | 210    | -05     | 537     | 964     | 42 |
| GO:001 |                                                     | 40/171 | 280/23 | 4.2833E | 0.00079 | 0.00054 |    |
| 0631   | epithelial cell migration                           | 0      | 210    | -05     | 439     | 263     | 40 |
| GO:009 |                                                     | 28/171 | 169/23 | 4.3646E | 0.00080 | 0.00054 |    |
| 8727   | maintenance of cell number                          | 0      | 210    | -05     | 435     | 943     | 28 |
| GO:200 |                                                     | 28/171 | 169/23 | 4.3646E | 0.00080 | 0.00054 |    |
| 1242   | regulation of intrinsic apoptotic signaling pathway | 0      | 210    | -05     | 435     | 943     | 28 |
| GO:003 |                                                     | 46/171 | 339/23 | 4.4092E | 0.00081 | 0.00055 |    |
| 1589   | cell-substrate adhesion                             | 0      | 210    | -05     | 002     | 33      | 46 |
| GO:004 |                                                     | 18/171 | 86/232 | 4.5589E | 0.00083 | 0.00057 |    |
| 3648   | dicarboxylic acid metabolic process                 | 0      | 10     | -05     | 49      | 03      | 18 |
| GO:000 |                                                     | 40/171 | 281/23 | 4.646E- | 0.00084 | 0.00057 |    |
| 1822   | kidney development                                  | 0      | 210    | 05      | 818     | 937     | 40 |
| GO:000 |                                                     | 21/171 | 110/23 | 4.7028E | 0.00085 | 0.00058 |    |
| 1843   | neural tube closure                                 | 0      | 210    | -05     | 524     | 42      | 21 |
| GO:004 |                                                     | 19/171 | 94/232 | 4.7139E | 0.00085 | 0.00058 |    |
| 2866   | pyruvate biosynthetic process                       | 0      | 10     | -05     | 524     | 42      | 19 |
| GO:001 |                                                     | 20/171 | 102/23 | 4.7552E | 0.00085 | 0.00058 |    |
| 0522   | regulation of calcium ion transport into cytosol    | 0      | 210    | -05     | 792     | 602     | 20 |
| GO:001 |                                                     | 49/171 | 370/23 | 4.7581E | 0.00085 | 0.00058 |    |
| 0876   | lipid localization                                  | 0      | 210    | -05     | 792     | 602     | 49 |
| GO:003 | regulation of polysaccharide biosynthetic process   | 11/171 | 37/232 | 4.7859E | 0.00085 | 0.00058 | 11 |

|        |                                                            |        |        |         |         |         |    |
|--------|------------------------------------------------------------|--------|--------|---------|---------|---------|----|
| 2885   |                                                            | 0      | 10     | -05     | 838     | 634     |    |
| GO:000 |                                                            |        | 20/232 | 4.8147E | 0.00085 | 0.00058 |    |
| 2577   | regulation of antigen processing and presentation          | 8/1710 | 10     | -05     | 838     | 634     | 8  |
| GO:004 |                                                            |        | 20/232 | 4.8147E | 0.00085 | 0.00058 |    |
| 5821   | positive regulation of glycolytic process                  | 8/1710 | 10     | -05     | 838     | 634     | 8  |
| GO:004 |                                                            | 13/171 | 50/232 | 4.8341E | 0.00085 | 0.00058 |    |
| 5981   | positive regulation of nucleotide metabolic process        | 0      | 10     | -05     | 838     | 634     | 13 |
| GO:190 |                                                            | 13/171 | 50/232 | 4.8341E | 0.00085 | 0.00058 |    |
| 0544   | positive regulation of purine nucleotide metabolic process | 0      | 10     | -05     | 838     | 634     | 13 |
| GO:004 |                                                            | 28/171 | 170/23 | 4.8639E | 0.00086 | 0.00058 |    |
| 6890   | regulation of lipid biosynthetic process                   | 0      | 210    | -05     | 106     | 817     | 28 |
| GO:000 |                                                            | 29/171 | 179/23 | 4.9073E | 0.00086 | 0.00058 |    |
| 6839   | mitochondrial transport                                    | 0      | 210    | -05     | 351     | 984     | 29 |
| GO:190 |                                                            | 29/171 | 179/23 | 4.9073E | 0.00086 | 0.00058 |    |
| 1861   | regulation of muscle tissue development                    | 0      | 210    | -05     | 351     | 984     | 29 |
| GO:009 |                                                            | 40/171 | 282/23 | 5.0364E | 0.00088 | 0.00060 |    |
| 0132   | epithelium migration                                       | 0      | 210    | -05     | 357     | 354     | 40 |
| GO:000 |                                                            |        | 11/232 | 5.2998E | 0.00092 | 0.00063 |    |
| 2579   | positive regulation of antigen processing and presentation | 6/1710 | 10     | -05     | 423     | 132     | 6  |
| GO:007 |                                                            |        | 11/232 | 5.2998E | 0.00092 | 0.00063 |    |
| 0831   | basement membrane assembly                                 | 6/1710 | 10     | -05     | 423     | 132     | 6  |
| GO:006 |                                                            | 21/171 | 111/23 | 5.4029E | 0.00093 | 0.00064 |    |
| 0606   | tube closure                                               | 0      | 210    | -05     | 856     | 111     | 21 |
| GO:004 |                                                            | 28/171 | 171/23 | 5.4142E | 0.00093 | 0.00064 |    |
| 3409   | negative regulation of MAPK cascade                        | 0      | 210    | -05     | 856     | 111     | 28 |
| GO:007 | protein localization to mitochondrion                      | 19/171 | 95/232 | 5.4905E | 0.00094 | 0.00064 | 19 |

|        |                                                      |        |        |         |         |         |    |
|--------|------------------------------------------------------|--------|--------|---------|---------|---------|----|
| 0585   |                                                      | 0      | 10     | -05     | 186     | 336     |    |
| GO:000 |                                                      | 20/171 | 103/23 | 5.4977E | 0.00094 | 0.00064 |    |
| 9135   | purine nucleoside diphosphate metabolic process      | 0      | 210    | -05     | 186     | 336     | 20 |
| GO:000 |                                                      | 20/171 | 103/23 | 5.4977E | 0.00094 | 0.00064 |    |
| 9179   | purine ribonucleoside diphosphate metabolic process  | 0      | 210    | -05     | 186     | 336     | 20 |
| GO:190 |                                                      | 20/171 | 103/23 | 5.4977E | 0.00094 | 0.00064 |    |
| 0542   | regulation of purine nucleotide metabolic process    | 0      | 210    | -05     | 186     | 336     | 20 |
| GO:000 |                                                      | 54/171 | 423/23 | 5.5251E | 0.00094 | 0.00064 |    |
| 6816   | calcium ion transport                                | 0      | 210    | -05     | 379     | 468     | 54 |
| GO:003 |                                                      | 16/171 | 72/232 | 5.5449E | 0.00094 | 0.00064 |    |
| 0239   | myofibril assembly                                   | 0      | 10     | -05     | 44      | 51      | 16 |
| GO:003 |                                                      | 25/171 | 145/23 | 5.6173E | 0.00095 | 0.00065 |    |
| 1099   | regeneration                                         | 0      | 210    | -05     | 397     | 163     | 25 |
| GO:009 |                                                      | 40/171 | 284/23 | 5.9083E | 0.00100 | 0.00068 |    |
| 0130   | tissue migration                                     | 0      | 210    | -05     | 047     | 34      | 40 |
| GO:005 |                                                      | 31/171 | 199/23 | 5.9272E | 0.00100 | 0.00068 |    |
| 0679   | positive regulation of epithelial cell proliferation | 0      | 210    | -05     | 077     | 36      | 31 |
| GO:003 |                                                      | 59/171 | 476/23 | 5.9885E | 0.00100 | 0.00068 |    |
| 3674   | positive regulation of kinase activity               | 0      | 210    | -05     | 821     | 869     | 59 |
| GO:001 |                                                      | 14/171 | 58/232 | 6.1153E | 0.00102 | 0.00070 |    |
| 0662   | regulation of striated muscle cell apoptotic process | 0      | 10     | -05     | 659     | 124     | 14 |
| GO:190 |                                                      |        | 26/232 | 6.1829E | 0.00103 | 0.00070 |    |
| 3579   | negative regulation of ATP metabolic process         | 9/1710 | 10     | -05     | 497     | 696     | 9  |
| GO:000 |                                                      | 18/171 | 88/232 | 6.2763E | 0.00104 | 0.00071 |    |
| 6112   | energy reserve metabolic process                     | 0      | 10     | -05     | 461     | 355     | 18 |
| GO:005 | regulation of stress fiber assembly                  | 18/171 | 88/232 | 6.2763E | 0.00104 | 0.00071 | 18 |

|        |                                                                               |        |        |         |         |         |    |
|--------|-------------------------------------------------------------------------------|--------|--------|---------|---------|---------|----|
| 1492   |                                                                               | 0      | 10     | -05     | 461     | 355     |    |
| GO:003 |                                                                               | 22/171 | 121/23 | 6.7897E | 0.00112 | 0.00076 |    |
| 2411   | positive regulation of transporter activity                                   | 0      | 210    | -05     | 366     | 754     | 22 |
| GO:190 |                                                                               | 22/171 | 121/23 | 6.7897E | 0.00112 | 0.00076 |    |
| 3409   | reactive oxygen species biosynthetic process                                  | 0      | 210    | -05     | 366     | 754     | 22 |
| GO:003 |                                                                               | 32/171 | 210/23 | 7.0185E | 0.00115 | 0.00079 |    |
| 3157   | regulation of intracellular protein transport                                 | 0      | 210    | -05     | 825     | 117     | 32 |
| GO:004 |                                                                               | 25/171 | 147/23 | 7.0806E | 0.00115 | 0.00079 |    |
| 2133   | neurotransmitter metabolic process                                            | 0      | 210    | -05     | 981     | 224     | 25 |
| GO:009 | negative regulation of transmembrane receptor protein serine/threonine kinase | 21/171 | 113/23 | 7.0875E | 0.00115 | 0.00079 |    |
| 0101   | signaling pathway                                                             | 0      | 210    | -05     | 981     | 224     | 21 |
| GO:190 |                                                                               | 21/171 | 113/23 | 7.0875E | 0.00115 | 0.00079 |    |
| 4019   | epithelial cell apoptotic process                                             | 0      | 210    | -05     | 981     | 224     | 21 |
| GO:007 |                                                                               | 54/171 | 427/23 | 7.1113E | 0.00116 | 0.00079 |    |
| 1900   | regulation of protein serine/threonine kinase activity                        | 0      | 210    | -05     | 045     | 268     | 54 |
| GO:004 |                                                                               | 15/171 | 66/232 | 7.1397E | 0.00116 | 0.00079 |    |
| 6324   | regulation of glucose import                                                  | 0      | 10     | -05     | 082     | 293     | 15 |
| GO:000 |                                                                               | 12/171 | 45/232 | 7.1732E | 0.00116 | 0.00079 |    |
| 1774   | microglial cell activation                                                    | 0      | 10     | -05     | 082     | 293     | 12 |
| GO:000 |                                                                               | 12/171 | 45/232 | 7.1732E | 0.00116 | 0.00079 |    |
| 2269   | leukocyte activation involved in inflammatory response                        | 0      | 10     | -05     | 082     | 293     | 12 |
| GO:199 |                                                                               | 26/171 | 156/23 | 7.2706E | 0.00116 | 0.00079 |    |
| 0845   | adaptive thermogenesis                                                        | 0      | 210    | -05     | 093     | 3       | 26 |
| GO:003 |                                                                               |        | 21/232 | 7.2758E | 0.00116 | 0.00079 |    |
| 0813   | positive regulation of nucleotide catabolic process                           | 8/1710 | 10     | -05     | 093     | 3       | 8  |
| GO:003 | positive regulation of superoxide anion generation                            | 8/1710 | 21/232 | 7.2758E | 0.00116 | 0.00079 | 8  |

|        |                                                               |        |         |         |         |         |
|--------|---------------------------------------------------------------|--------|---------|---------|---------|---------|
| 2930   |                                                               | 10     | -05     | 093     | 3       |         |
| GO:005 |                                                               | 21/232 | 7.2758E | 0.00116 | 0.00079 |         |
| 1197   | positive regulation of coenzyme metabolic process             | 8/1710 | 10      | -05     | 093     | 3       |
| GO:001 |                                                               | 20/171 | 105/23  | 7.2984E | 0.00116 | 0.00079 |
| 4897   | striated muscle hypertrophy                                   | 0      | 210     | -05     | 093     | 3       |
| GO:190 |                                                               | 18/171 | 89/232  | 7.3323E | 0.00116 | 0.00079 |
| 0076   | regulation of cellular response to insulin stimulus           | 0      | 10      | -05     | 093     | 3       |
| GO:000 |                                                               |        | 16/232  | 7.3527E | 0.00116 | 0.00079 |
| 6103   | 2-oxoglutarate metabolic process                              | 7/1710 | 10      | -05     | 093     | 3       |
| GO:006 |                                                               |        | 16/232  | 7.3527E | 0.00116 | 0.00079 |
| 0192   | negative regulation of lipase activity                        | 7/1710 | 10      | -05     | 093     | 3       |
| GO:007 |                                                               |        | 16/232  | 7.3527E | 0.00116 | 0.00079 |
| 1498   | cellular response to fluid shear stress                       | 7/1710 | 10      | -05     | 093     | 3       |
| GO:001 |                                                               | 27/171 | 165/23  | 7.3802E | 0.00116 | 0.00079 |
| 9827   | stem cell population maintenance                              | 0      | 210     | -05     | 213     | 382     |
| GO:006 |                                                               | 13/171 | 52/232  | 7.5316E | 0.00118 | 0.00080 |
| 1077   | chaperone-mediated protein folding                            | 0      | 10      | -05     | 279     | 793     |
| GO:000 |                                                               | 56/171 | 449/23  | 7.707E- | 0.00120 | 0.00082 |
| 1819   | positive regulation of cytokine production                    | 0      | 210     | 05      | 709     | 453     |
| GO:002 |                                                               | 47/171 | 357/23  | 7.7714E | 0.00121 | 0.00082 |
| 2411   | cellular component disassembly                                | 0      | 210     | -05     | 391     | 919     |
| GO:003 |                                                               | 21/171 | 114/23  | 8.0934E | 0.00126 | 0.00086 |
| 2414   | positive regulation of ion transmembrane transporter activity | 0      | 210     | -05     | 084     | 125     |
| GO:190 |                                                               | 11/171 | 39/232  | 8.181E- | 0.00127 | 0.00086 |
| 1998   | toxin transport                                               | 0      | 10      | 05      | 11      | 826     |
| GO:000 | isoprenoid metabolic process                                  | 17/171 | 82/232  | 8.3329E | 0.00129 | 0.00088 |

|        |                                                            |        |        |         |         |         |    |
|--------|------------------------------------------------------------|--------|--------|---------|---------|---------|----|
| 6720   |                                                            | 0      | 10     | -05     | 127     | 203     |    |
| GO:004 |                                                            | 44/171 | 328/23 | 8.3766E | 0.00129 | 0.00088 |    |
| 5862   | positive regulation of proteolysis                         | 0      | 210    | -05     | 191     | 247     | 44 |
| GO:004 |                                                            | 20/171 | 106/23 | 8.3812E | 0.00129 | 0.00088 |    |
| 5185   | maintenance of protein location                            | 0      | 210    | -05     | 191     | 247     | 20 |
| GO:000 |                                                            | 18/171 | 90/232 | 8.5421E | 0.00130 | 0.00089 |    |
| 6096   | glycolytic process                                         | 0      | 10     | -05     | 979     | 468     | 18 |
| GO:004 |                                                            | 18/171 | 90/232 | 8.5421E | 0.00130 | 0.00089 |    |
| 2770   | signal transduction in response to DNA damage              | 0      | 10     | -05     | 979     | 468     | 18 |
| GO:003 |                                                            |        | 27/232 | 8.6701E | 0.00132 | 0.00090 |    |
| 3014   | tetrapyrrole biosynthetic process                          | 9/1710 | 10     | -05     | 226     | 321     | 9  |
| GO:190 |                                                            |        | 27/232 | 8.6701E | 0.00132 | 0.00090 |    |
| 0543   | negative regulation of purine nucleotide metabolic process | 9/1710 | 10     | -05     | 226     | 321     | 9  |
| GO:005 |                                                            | 56/171 | 451/23 | 8.6914E | 0.00132 | 0.00090 |    |
| 0808   | synapse organization                                       | 0      | 210    | -05     | 226     | 321     | 56 |
| GO:000 |                                                            | 26/171 | 158/23 | 9.0416E | 0.00137 | 0.00093 |    |
| 8654   | phospholipid biosynthetic process                          | 0      | 210    | -05     | 197     | 716     | 26 |
| GO:000 |                                                            | 16/171 | 75/232 | 9.3347E | 0.00140 | 0.00096 |    |
| 0271   | polysaccharide biosynthetic process                        | 0      | 10     | -05     | 913     | 254     | 16 |
| GO:005 |                                                            | 16/171 | 75/232 | 9.3347E | 0.00140 | 0.00096 |    |
| 1193   | regulation of cofactor metabolic process                   | 0      | 10     | -05     | 913     | 254     | 16 |
| GO:000 |                                                            | 19/171 | 99/232 | 9.8529E | 0.00147 | 0.00101 |    |
| 6892   | post-Golgi vesicle-mediated transport                      | 0      | 10     | -05     | 906     | 031     | 19 |
| GO:009 |                                                            | 19/171 | 99/232 | 9.8529E | 0.00147 | 0.00101 |    |
| 8876   | vesicle-mediated transport to the plasma membrane          | 0      | 10     | -05     | 906     | 031     | 19 |
| GO:006 | cardiac muscle contraction                                 | 22/171 | 124/23 | 9.9105E | 0.00147 | 0.00101 | 22 |



|        |                                                           |        |        |         |         |         |    |
|--------|-----------------------------------------------------------|--------|--------|---------|---------|---------|----|
| 0048   |                                                           | 0      | 210    | -05     | 906     | 031     |    |
| GO:000 |                                                           | 18/171 | 91/232 | 9.9245E | 0.00147 | 0.00101 |    |
| 1938   | positive regulation of endothelial cell proliferation     | 0      | 10     | -05     | 906     | 031     | 18 |
| GO:000 |                                                           | 18/171 | 91/232 | 9.9245E | 0.00147 | 0.00101 |    |
| 6757   | ATP generation from ADP                                   | 0      | 10     | -05     | 906     | 031     | 18 |
| GO:004 |                                                           | 31/171 | 205/23 | 0.00010 | 0.00155 | 0.00105 |    |
| 3112   | receptor metabolic process                                | 0      | 210    | 441     | 07      | 925     | 31 |
| GO:190 |                                                           | 21/171 | 116/23 | 0.00010 | 0.00155 | 0.00105 |    |
| 3828   | negative regulation of cellular protein localization      | 0      | 210    | 493     | 07      | 925     | 21 |
| GO:000 |                                                           | 11/171 | 40/232 | 0.00010 | 0.00155 | 0.00105 |    |
| 0266   | mitochondrial fission                                     | 0      | 10     | 538     | 07      | 925     | 11 |
| GO:008 |                                                           | 11/171 | 40/232 | 0.00010 | 0.00155 | 0.00105 |    |
| 6004   | regulation of cardiac muscle cell contraction             | 0      | 10     | 538     | 07      | 925     | 11 |
| GO:190 |                                                           | 11/171 | 40/232 | 0.00010 | 0.00155 | 0.00105 |    |
| 3053   | regulation of extracellular matrix organization           | 0      | 10     | 538     | 07      | 925     | 11 |
| GO:004 |                                                           |        | 22/232 | 0.00010 | 0.00157 | 0.00107 |    |
| 6628   | positive regulation of insulin receptor signaling pathway | 8/1710 | 10     | 697     | 008     | 249     | 8  |
| GO:001 |                                                           | 51/171 | 403/23 | 0.00010 | 0.00160 | 0.00109 |    |
| 0639   | negative regulation of organelle organization             | 0      | 210    | 951     | 337     | 523     | 51 |
| GO:004 |                                                           | 14/171 | 61/232 | 0.00011 | 0.00160 | 0.00109 |    |
| 5600   | positive regulation of fat cell differentiation           | 0      | 10     | 018     | 923     | 922     | 14 |
| GO:005 |                                                           | 27/171 | 169/23 | 0.00011 | 0.00162 | 0.00111 |    |
| 0821   | protein stabilization                                     | 0      | 210    | 2       | 81      | 212     | 27 |
| GO:003 |                                                           | 22/171 | 125/23 | 0.00011 | 0.00162 | 0.00111 |    |
| 2273   | positive regulation of protein polymerization             | 0      | 210    | 203     | 81      | 212     | 22 |
| GO:004 | Golgi vesicle transport                                   | 37/171 | 263/23 | 0.00011 | 0.00162 | 0.00111 | 37 |

|        |                                                           |        |        |         |         |         |    |
|--------|-----------------------------------------------------------|--------|--------|---------|---------|---------|----|
| 8193   |                                                           | 0      | 210    | 239     | 92      | 287     |    |
| GO:003 |                                                           | 57/171 | 466/23 | 0.00011 | 0.00164 | 0.00112 |    |
| 1346   | positive regulation of cell projection organization       | 0      | 210    | 352     | 149     | 126     | 57 |
| GO:004 |                                                           | 17/171 | 84/232 | 0.00011 | 0.00164 | 0.00112 |    |
| 5844   | positive regulation of striated muscle tissue development | 0      | 10     | 417     | 204     | 164     | 17 |
| GO:004 |                                                           | 17/171 | 84/232 | 0.00011 | 0.00164 | 0.00112 |    |
| 8636   | positive regulation of muscle organ development           | 0      | 10     | 417     | 204     | 164     | 17 |
| GO:003 |                                                           | 31/171 | 206/23 | 0.00011 | 0.00164 | 0.00112 |    |
| 4329   | cell junction assembly                                    | 0      | 210    | 44      | 204     | 164     | 31 |
| GO:004 |                                                           |        | 17/232 | 0.00011 | 0.00167 | 0.00114 |    |
| 5725   | positive regulation of glycogen biosynthetic process      | 7/1710 | 10     | 705     | 596     | 481     | 7  |
| GO:001 |                                                           | 21/171 | 117/23 | 0.00011 | 0.00169 | 0.00115 |    |
| 4020   | primary neural tube formation                             | 0      | 210    | 913     | 378     | 698     | 21 |
| GO:000 |                                                           |        | 28/232 | 0.00011 | 0.00169 | 0.00115 |    |
| 5979   | regulation of glycogen biosynthetic process               | 9/1710 | 10     | 945     | 378     | 698     | 9  |
| GO:001 |                                                           |        | 28/232 | 0.00011 | 0.00169 | 0.00115 |    |
| 0962   | regulation of glucan biosynthetic process                 | 9/1710 | 10     | 945     | 378     | 698     | 9  |
| GO:004 |                                                           |        | 28/232 | 0.00011 | 0.00169 | 0.00115 |    |
| 5980   | negative regulation of nucleotide metabolic process       | 9/1710 | 10     | 945     | 378     | 698     | 9  |
| GO:004 |                                                           | 32/171 | 216/23 | 0.00012 | 0.00170 | 0.00116 |    |
| 8545   | response to steroid hormone                               | 0      | 210    | 083     | 924     | 754     | 32 |
| GO:001 |                                                           | 24/171 | 143/23 | 0.00012 | 0.00170 | 0.00116 |    |
| 0634   | positive regulation of epithelial cell migration          | 0      | 210    | 113     | 924     | 754     | 24 |
| GO:001 |                                                           | 25/171 | 152/23 | 0.00012 | 0.00173 | 0.00118 |    |
| 0675   | regulation of cellular carbohydrate metabolic process     | 0      | 210    | 336     | 649     | 615     | 25 |
| GO:006 | cytosolic calcium ion transport                           | 27/171 | 170/23 | 0.00012 | 0.00173 | 0.00118 | 27 |

|        |                                                   |        |        |         |         |         |    |
|--------|---------------------------------------------------|--------|--------|---------|---------|---------|----|
| 0401   |                                                   | 0      | 210    | 397     | 756     | 689     |    |
| GO:007 |                                                   | 51/171 | 405/23 | 0.00012 | 0.00173 | 0.00118 |    |
| 0997   | neuron death                                      | 0      | 210    | 403     | 756     | 689     | 51 |
| GO:190 |                                                   | 19/171 | 101/23 | 0.00013 | 0.00181 | 0.00124 |    |
| 1222   | regulation of NIK/NF-kappaB signaling             | 0      | 210    | 011     | 845     | 214     | 19 |
| GO:000 |                                                   | 14/171 | 62/232 | 0.00013 | 0.00183 | 0.00125 |    |
| 6721   | terpenoid metabolic process                       | 0      | 10     | 277     | 132     | 093     | 14 |
| GO:001 |                                                   | 14/171 | 62/232 | 0.00013 | 0.00183 | 0.00125 |    |
| 0658   | striated muscle cell apoptotic process            | 0      | 10     | 277     | 132     | 093     | 14 |
| GO:007 |                                                   | 14/171 | 62/232 | 0.00013 | 0.00183 | 0.00125 |    |
| 0988   | demethylation                                     | 0      | 10     | 277     | 132     | 093     | 14 |
| GO:008 |                                                   | 14/171 | 62/232 | 0.00013 | 0.00183 | 0.00125 |    |
| 6003   | cardiac muscle cell contraction                   | 0      | 10     | 277     | 132     | 093     | 14 |
| GO:000 |                                                   | 18/171 | 93/232 | 0.00013 | 0.00183 | 0.00125 |    |
| 9062   | fatty acid catabolic process                      | 0      | 10     | 291     | 132     | 093     | 18 |
| GO:004 |                                                   | 18/171 | 93/232 | 0.00013 | 0.00183 | 0.00125 |    |
| 2116   | macrophage activation                             | 0      | 10     | 291     | 132     | 093     | 18 |
| GO:003 |                                                   | 46/171 | 355/23 | 0.00013 | 0.00184 | 0.00126 |    |
| 1331   | positive regulation of cellular catabolic process | 0      | 210    | 427     | 563     | 071     | 46 |
| GO:000 |                                                   | 27/171 | 171/23 | 0.00013 | 0.00187 | 0.00128 |    |
| 0082   | G1/S transition of mitotic cell cycle             | 0      | 210    | 706     | 96      | 391     | 27 |
| GO:004 |                                                   | 54/171 | 438/23 | 0.00013 | 0.00189 | 0.00129 |    |
| 5860   | positive regulation of protein kinase activity    | 0      | 210    | 853     | 527     | 461     | 54 |
| GO:005 |                                                   | 12/171 | 48/232 | 0.00014 | 0.00191 | 0.00131 |    |
| 0435   | amyloid-beta metabolic process                    | 0      | 10     | 135     | 935     | 106     | 12 |
| GO:005 | brown fat cell differentiation                    | 12/171 | 48/232 | 0.00014 | 0.00191 | 0.00131 | 12 |

|        |                                                 |        |        |         |         |         |    |
|--------|-------------------------------------------------|--------|--------|---------|---------|---------|----|
| 0873   |                                                 | 0      | 10     | 135     | 935     | 106     |    |
| GO:190 |                                                 | 12/171 | 48/232 | 0.00014 | 0.00191 | 0.00131 |    |
| 3115   | regulation of actin filament-based movement     | 0      | 10     | 135     | 935     | 106     | 12 |
| GO:003 |                                                 | 30/171 | 199/23 | 0.00014 | 0.00191 | 0.00131 |    |
| 0522   | intracellular receptor signaling pathway        | 0      | 210    | 16      | 935     | 106     | 30 |
| GO:001 |                                                 | 22/171 | 127/23 | 0.00014 | 0.00192 | 0.00131 |    |
| 4065   | phosphatidylinositol 3-kinase signaling         | 0      | 210    | 245     | 642     | 589     | 22 |
| GO:004 |                                                 | 32/171 | 218/23 | 0.00014 | 0.00194 | 0.00132 |    |
| 2445   | hormone metabolic process                       | 0      | 210    | 39      | 147     | 617     | 32 |
| GO:001 |                                                 | 35/171 | 247/23 | 0.00014 | 0.00198 | 0.00135 |    |
| 0506   | regulation of autophagy                         | 0      | 210    | 719     | 128     | 337     | 35 |
| GO:001 |                                                 | 23/171 | 136/23 | 0.00014 | 0.00198 | 0.00135 |    |
| 0821   | regulation of mitochondrion organization        | 0      | 210    | 775     | 425     | 539     | 23 |
| GO:200 |                                                 | 10/171 | 35/232 | 0.00015 | 0.00204 | 0.00139 |    |
| 0249   | regulation of actin cytoskeleton reorganization | 0      | 10     | 261     | 477     | 673     | 10 |
| GO:000 |                                                 | 17/171 | 86/232 | 0.00015 | 0.00206 | 0.00141 |    |
| 7044   | cell-substrate junction assembly                | 0      | 10     | 459     | 664     | 167     | 17 |
| GO:004 |                                                 | 14/171 | 63/232 | 0.00015 | 0.00211 | 0.00144 |    |
| 5454   | cell redox homeostasis                          | 0      | 10     | 926     | 451     | 437     | 14 |
| GO:004 |                                                 | 14/171 | 63/232 | 0.00015 | 0.00211 | 0.00144 |    |
| 5661   | regulation of myoblast differentiation          | 0      | 10     | 926     | 451     | 437     | 14 |
| GO:007 |                                                 | 57/171 | 472/23 | 0.00015 | 0.00211 | 0.00144 |    |
| 0838   | divalent metal ion transport                    | 0      | 210    | 962     | 451     | 437     | 57 |
| GO:190 |                                                 | 57/171 | 472/23 | 0.00015 | 0.00211 | 0.00144 |    |
| 3532   | positive regulation of secretion by cell        | 0      | 210    | 962     | 451     | 437     | 57 |
| GO:190 | regulation of neuron death                      | 47/171 | 368/23 | 0.00016 | 0.00212 | 0.00145 | 47 |

|        |                                                                            |        |        |         |         |         |    |
|--------|----------------------------------------------------------------------------|--------|--------|---------|---------|---------|----|
| 1214   |                                                                            | 0      | 210    | 106     | 874     | 409     |    |
| GO:009 |                                                                            | 33/171 | 229/23 | 0.00016 | 0.00214 | 0.00146 |    |
| 7191   | extrinsic apoptotic signaling pathway                                      | 0      | 210    | 305     | 536     | 544     | 33 |
| GO:190 |                                                                            | 33/171 | 229/23 | 0.00016 | 0.00214 | 0.00146 |    |
| 3320   | regulation of protein modification by small protein conjugation or removal | 0      | 210    | 305     | 536     | 544     | 33 |
| GO:000 |                                                                            | 23/171 | 137/23 | 0.00016 | 0.00217 | 0.00148 |    |
| 2221   | pattern recognition receptor signaling pathway                             | 0      | 210    | 538     | 115     | 306     | 23 |
| GO:001 |                                                                            | 34/171 | 239/23 | 0.00016 | 0.00220 | 0.00150 |    |
| 6485   | protein processing                                                         | 0      | 210    | 832     | 061     | 318     | 34 |
| GO:009 |                                                                            | 24/171 | 146/23 | 0.00016 | 0.00220 | 0.00150 |    |
| 7530   | granulocyte migration                                                      | 0      | 210    | 838     | 061     | 318     | 24 |
| GO:000 |                                                                            | 19/171 | 103/23 | 0.00017 | 0.00220 | 0.00150 |    |
| 6165   | nucleoside diphosphate phosphorylation                                     | 0      | 210    | 028     | 572     | 667     | 19 |
| GO:001 |                                                                            | 19/171 | 103/23 | 0.00017 | 0.00220 | 0.00150 |    |
| 7015   | regulation of transforming growth factor beta receptor signaling pathway   | 0      | 210    | 028     | 572     | 667     | 19 |
| GO:003 |                                                                            | 19/171 | 103/23 | 0.00017 | 0.00220 | 0.00150 |    |
| 0038   | contractile actin filament bundle assembly                                 | 0      | 210    | 028     | 572     | 667     | 19 |
| GO:004 |                                                                            | 19/171 | 103/23 | 0.00017 | 0.00220 | 0.00150 |    |
| 3149   | stress fiber assembly                                                      | 0      | 210    | 028     | 572     | 667     | 19 |
| GO:004 |                                                                            | 21/171 | 120/23 | 0.00017 | 0.00222 | 0.00152 |    |
| 5727   | positive regulation of translation                                         | 0      | 210    | 249     | 651     | 087     | 21 |
| GO:005 |                                                                            |        | 13/232 | 0.00017 | 0.00222 | 0.00152 |    |
| 5119   | relaxation of cardiac muscle                                               | 6/1710 | 10     | 303     | 651     | 087     | 6  |
| GO:006 |                                                                            |        | 13/232 | 0.00017 | 0.00222 | 0.00152 |    |
| 0391   | positive regulation of SMAD protein signal transduction                    | 6/1710 | 10     | 303     | 651     | 087     | 6  |
| GO:004 | positive regulation of cell cycle                                          | 45/171 | 349/23 | 0.00017 | 0.00226 | 0.00155 | 45 |

|        |                                                               |        |        |         |         |         |    |
|--------|---------------------------------------------------------------|--------|--------|---------|---------|---------|----|
| 5787   |                                                               | 0      | 210    | 679     | 99      | 051     |    |
| GO:005 |                                                               | 16/171 | 79/232 | 0.00017 | 0.00227 | 0.00155 |    |
| 1279   | regulation of release of sequestered calcium ion into cytosol | 0      | 10     | 8       | 799     | 604     | 16 |
| GO:005 |                                                               | 31/171 | 211/23 | 0.00017 | 0.00227 | 0.00155 |    |
| 1216   | cartilage development                                         | 0      | 210    | 836     | 799     | 604     | 31 |
| GO:001 |                                                               | 17/171 | 87/232 | 0.00017 | 0.00227 | 0.00155 |    |
| 0717   | regulation of epithelial to mesenchymal transition            | 0      | 10     | 913     | 799     | 604     | 17 |
| GO:007 |                                                               | 17/171 | 87/232 | 0.00017 | 0.00227 | 0.00155 |    |
| 0252   | actin-mediated cell contraction                               | 0      | 10     | 913     | 799     | 604     | 17 |
| GO:006 |                                                               |        | 18/232 | 0.00017 | 0.00227 | 0.00155 |    |
| 0416   | response to growth hormone                                    | 7/1710 | 10     | 937     | 799     | 604     | 7  |
| GO:000 |                                                               | 50/171 | 401/23 | 0.00018 | 0.00231 | 0.00158 |    |
| 9991   | response to extracellular stimulus                            | 0      | 210    | 301     | 921     | 42      | 50 |
| GO:000 |                                                               | 52/171 | 422/23 | 0.00018 | 0.00233 | 0.00159 |    |
| 9896   | positive regulation of catabolic process                      | 0      | 210    | 482     | 709     | 641     | 52 |
| GO:190 |                                                               | 24/171 | 147/23 | 0.00018 | 0.00236 | 0.00161 |    |
| 2904   | negative regulation of supramolecular fiber organization      | 0      | 210    | 742     | 479     | 533     | 24 |
| GO:007 |                                                               | 25/171 | 156/23 | 0.00018 | 0.00236 | 0.00161 |    |
| 1383   | cellular response to steroid hormone stimulus                 | 0      | 210    | 795     | 637     | 641     | 25 |
| GO:007 |                                                               | 57/171 | 475/23 | 0.00018 | 0.00236 | 0.00161 |    |
| 2511   | divalent inorganic cation transport                           | 0      | 210    | 854     | 877     | 805     | 57 |
| GO:003 |                                                               | 14/171 | 64/232 | 0.00019 | 0.00238 | 0.00162 |    |
| 2233   | positive regulation of actin filament bundle assembly         | 0      | 10     | 019     | 429     | 865     | 14 |
| GO:003 |                                                               | 31/171 | 212/23 | 0.00019 | 0.00243 | 0.00166 |    |
| 5264   | multicellular organism growth                                 | 0      | 210    | 446     | 257     | 163     | 31 |
| GO:001 | negative regulation of striated muscle cell apoptotic process | 10/171 | 36/232 | 0.00019 | 0.00245 | 0.00168 | 10 |

|        |                                                          |        |        |         |         |         |    |
|--------|----------------------------------------------------------|--------|--------|---------|---------|---------|----|
| 0664   |                                                          | 0      | 10     | 745     | 946     |         |    |
| GO:190 |                                                          | 10/171 | 36/232 | 0.00019 | 0.00245 |         |    |
| 4037   | positive regulation of epithelial cell apoptotic process | 0      | 10     | 745     | 946     | 0.00168 | 10 |
| GO:001 |                                                          | 18/171 | 96/232 | 0.00020 | 0.00250 | 0.00171 |    |
| 4066   | regulation of phosphatidylinositol 3-kinase signaling    | 0      | 10     | 216     | 744     | 277     | 18 |
| GO:012 |                                                          | 18/171 | 96/232 | 0.00020 | 0.00250 | 0.00171 |    |
| 0162   | positive regulation of cold-induced thermogenesis        | 0      | 10     | 216     | 744     | 277     | 18 |
| GO:000 |                                                          | 23/171 | 139/23 | 0.00020 | 0.00255 | 0.00174 |    |
| 2758   | innate immune response-activating signal transduction    | 0      | 210    | 632     | 369     | 437     | 23 |
| GO:004 |                                                          | 25/171 | 157/23 | 0.00020 | 0.00257 | 0.00175 |    |
| 5834   | positive regulation of lipid metabolic process           | 0      | 210    | 818     | 122     | 634     | 25 |
| GO:000 |                                                          | 40/171 | 301/23 | 0.00021 | 0.00258 | 0.00176 |    |
| 8202   | steroid metabolic process                                | 0      | 210    | 011     | 964     | 892     | 40 |
| GO:000 |                                                          | 11/171 | 43/232 | 0.00021 | 0.00262 | 0.00179 |    |
| 5978   | glycogen biosynthetic process                            | 0      | 10     | 36      | 157     | 073     | 11 |
| GO:000 |                                                          | 11/171 | 43/232 | 0.00021 | 0.00262 | 0.00179 |    |
| 9250   | glucan biosynthetic process                              | 0      | 10     | 36      | 157     | 073     | 11 |
| GO:001 |                                                          | 12/171 | 50/232 | 0.00021 | 0.00262 | 0.00179 |    |
| 0828   | positive regulation of glucose transmembrane transport   | 0      | 10     | 468     | 932     | 602     | 12 |
| GO:003 |                                                          |        | 24/232 | 0.00021 | 0.00263 | 0.00179 |    |
| 2928   | regulation of superoxide anion generation                | 8/1710 | 10     | 538     | 228     | 804     | 8  |
| GO:004 |                                                          | 28/171 | 185/23 | 0.00021 | 0.00264 | 0.00180 |    |
| 4843   | cell cycle G1/S phase transition                         | 0      | 210    | 704     | 158     | 44      | 28 |
| GO:004 |                                                          | 28/171 | 185/23 | 0.00021 | 0.00264 | 0.00180 |    |
| 5766   | positive regulation of angiogenesis                      | 0      | 210    | 704     | 158     | 44      | 28 |
| GO:004 | gland development                                        | 56/171 | 467/23 | 0.00021 | 0.00264 | 0.00180 | 56 |

|        |                                                                             |        |        |         |         |         |    |
|--------|-----------------------------------------------------------------------------|--------|--------|---------|---------|---------|----|
| 8732   |                                                                             | 0      | 210    | 764     | 339     | 563     |    |
| GO:004 |                                                                             | 19/171 | 105/23 | 0.00022 | 0.00266 | 0.00182 |    |
| 6939   | nucleotide phosphorylation                                                  | 0      | 210    | 094     | 907     | 318     | 19 |
| GO:190 |                                                                             | 19/171 | 105/23 | 0.00022 | 0.00266 | 0.00182 |    |
| 3844   | regulation of cellular response to transforming growth factor beta stimulus | 0      | 210    | 094     | 907     | 318     | 19 |
| GO:190 |                                                                             | 30/171 | 204/23 | 0.00022 | 0.00266 | 0.00182 |    |
| 4018   | positive regulation of vasculature development                              | 0      | 210    | 113     | 907     | 318     | 30 |
| GO:003 |                                                                             | 57/171 | 478/23 | 0.00022 | 0.00267 | 0.00182 |    |
| 4765   | regulation of ion transmembrane transport                                   | 0      | 210    | 214     | 581     | 778     | 57 |
| GO:001 |                                                                             | 27/171 | 176/23 | 0.00022 | 0.00267 | 0.00182 |    |
| 6202   | regulation of striated muscle tissue development                            | 0      | 210    | 286     | 891     | 99      | 27 |
| GO:006 |                                                                             | 37/171 | 272/23 | 0.00022 | 0.00268 | 0.00183 |    |
| 0485   | mesenchyme development                                                      | 0      | 210    | 382     | 491     | 399     | 37 |
| GO:009 |                                                                             | 39/171 | 292/23 | 0.00022 | 0.00270 | 0.00184 |    |
| 7193   | intrinsic apoptotic signaling pathway                                       | 0      | 210    | 562     | 101     | 499     | 39 |
| GO:006 |                                                                             | 14/171 | 65/232 | 0.00022 | 0.00270 | 0.00184 |    |
| 0389   | pathway-restricted SMAD protein phosphorylation                             | 0      | 10     | 616     | 185     | 557     | 14 |
| GO:006 |                                                                             | 15/171 | 73/232 | 0.00023 | 0.00283 | 0.00193 |    |
| 0191   | regulation of lipase activity                                               | 0      | 10     | 752     | 186     | 437     | 15 |
| GO:005 |                                                                             | 30/171 | 205/23 | 0.00024 | 0.00286 | 0.00195 |    |
| 1099   | positive regulation of binding                                              | 0      | 210    | 114     | 908     | 98      | 30 |
| GO:003 |                                                                             | 33/171 | 234/23 | 0.00024 | 0.00291 | 0.00198 |    |
| 3002   | muscle cell proliferation                                                   | 0      | 210    | 523     | 185     | 901     | 33 |
| GO:000 |                                                                             | 22/171 | 132/23 | 0.00025 | 0.00299 | 0.00204 |    |
| 1841   | neural tube formation                                                       | 0      | 210    | 258     | 019     | 252     | 22 |
| GO:004 | superoxide anion generation                                                 | 10/171 | 37/232 | 0.00025 | 0.00299 | 0.00204 | 10 |



|        |                                                            |        |        |         |         |         |         |
|--------|------------------------------------------------------------|--------|--------|---------|---------|---------|---------|
| 2554   |                                                            | 0      | 10     | 285     | 019     | 252     |         |
| GO:003 |                                                            |        | 19/232 | 0.00026 | 0.00312 | 0.00213 |         |
| 5994   | response to muscle stretch                                 | 7/1710 | 10     | 599     | 064     | 163     | 7       |
| GO:007 |                                                            |        | 19/232 | 0.00026 | 0.00312 | 0.00213 |         |
| 0875   | positive regulation of glycogen metabolic process          | 7/1710 | 10     | 599     | 064     | 163     | 7       |
| GO:009 |                                                            |        | 19/232 | 0.00026 | 0.00312 | 0.00213 |         |
| 0030   | regulation of steroid hormone biosynthetic process         | 7/1710 | 10     | 599     | 064     | 163     | 7       |
| GO:003 |                                                            |        | 11/171 | 44/232  | 0.00026 | 0.00312 | 0.00213 |
| 2881   | regulation of polysaccharide metabolic process             | 0      | 10     | 602     | 064     | 163     | 11      |
| GO:004 |                                                            |        | 31/171 | 216/23  | 0.00027 | 0.00319 | 0.00217 |
| 8762   | mesenchymal cell differentiation                           | 0      | 210    | 258     | 117     | 981     | 31      |
| GO:004 |                                                            |        | 17/171 | 90/232  | 0.00027 | 0.00320 | 0.00218 |
| 3535   | regulation of blood vessel endothelial cell migration      | 0      | 10     | 421     | 382     | 845     | 17      |
| GO:000 |                                                            |        | 50/171 | 408/23  | 0.00027 | 0.00323 | 0.00220 |
| 1933   | negative regulation of protein phosphorylation             | 0      | 210    | 724     | 276     | 822     | 50      |
| GO:190 |                                                            |        | 15/171 | 74/232  | 0.00027 | 0.00323 | 0.00220 |
| 1224   | positive regulation of NIK/NF-kappaB signaling             | 0      | 10     | 789     | 39      | 9       | 15      |
| GO:000 |                                                            |        | 16/171 | 82/232  | 0.00027 | 0.00323 | 0.00221 |
| 6637   | acyl-CoA metabolic process                                 | 0      | 10     | 936     | 811     | 187     | 16      |
| GO:003 |                                                            |        | 16/171 | 82/232  | 0.00027 | 0.00323 | 0.00221 |
| 5383   | thioester metabolic process                                | 0      | 10     | 936     | 811     | 187     | 16      |
| GO:001 |                                                            |        | 22/171 | 133/23  | 0.00028 | 0.00326 | 0.00222 |
| 6999   | antibiotic metabolic process                               | 0      | 210    | 195     | 17      | 799     | 22      |
| GO:200 |                                                            |        |        | 14/232  | 0.00028 | 0.00326 | 0.00223 |
| 0052   | positive regulation of non-canonical Wnt signaling pathway | 6/1710 | 10     | 393     | 466     | 001     | 6       |
| GO:003 | NIK/NF-kappaB signaling                                    | 19/171 | 107/23 | 0.00028 | 0.00326 | 0.00223 | 19      |

|        |                                                                  |        |        |         |         |         |    |
|--------|------------------------------------------------------------------|--------|--------|---------|---------|---------|----|
| 8061   |                                                                  | 0      | 210    | 432     | 466     | 001     |    |
| GO:000 |                                                                  |        | 31/232 | 0.00028 | 0.00326 | 0.00223 |    |
| 6506   | GPI anchor biosynthetic process                                  | 9/1710 | 10     | 5       | 466     | 001     | 9  |
| GO:009 |                                                                  |        | 31/232 | 0.00028 | 0.00326 | 0.00223 |    |
| 0075   | relaxation of muscle                                             | 9/1710 | 10     | 5       | 466     | 001     | 9  |
| GO:190 |                                                                  |        | 31/232 | 0.00028 | 0.00326 | 0.00223 |    |
| 5476   | negative regulation of protein localization to membrane          | 9/1710 | 10     | 5       | 466     | 001     | 9  |
| GO:001 |                                                                  | 13/171 | 59/232 | 0.00029 | 0.00335 | 0.00229 |    |
| 0524   | positive regulation of calcium ion transport into cytosol        | 0      | 10     | 596     | 829     | 396     | 13 |
| GO:190 |                                                                  | 13/171 | 59/232 | 0.00029 | 0.00335 | 0.00229 |    |
| 1016   | regulation of potassium ion transmembrane transporter activity   | 0      | 10     | 596     | 829     | 396     | 13 |
| GO:000 |                                                                  |        | 25/232 | 0.00029 | 0.00335 | 0.00229 |    |
| 2478   | antigen processing and presentation of exogenous peptide antigen | 8/1710 | 10     | 638     | 829     | 396     | 8  |
| GO:007 |                                                                  |        | 25/232 | 0.00029 | 0.00335 | 0.00229 |    |
| 1711   | basement membrane organization                                   | 8/1710 | 10     | 638     | 829     | 396     | 8  |
| GO:190 |                                                                  |        | 25/232 | 0.00029 | 0.00335 | 0.00229 |    |
| 4376   | negative regulation of protein localization to cell periphery    | 8/1710 | 10     | 638     | 829     | 396     | 8  |
| GO:001 |                                                                  | 40/171 | 306/23 | 0.00029 | 0.00335 | 0.00229 |    |
| 6042   | lipid catabolic process                                          | 0      | 210    | 662     | 829     | 396     | 40 |
| GO:004 |                                                                  | 29/171 | 198/23 | 0.00029 | 0.00337 | 0.00230 |    |
| 3542   | endothelial cell migration                                       | 0      | 210    | 91      | 758     | 714     | 29 |
| GO:003 |                                                                  | 18/171 | 99/232 | 0.00030 | 0.00337 | 0.00230 |    |
| 3865   | nucleoside bisphosphate metabolic process                        | 0      | 10     | 103     | 758     | 714     | 18 |
| GO:003 |                                                                  | 18/171 | 99/232 | 0.00030 | 0.00337 | 0.00230 |    |
| 3875   | ribonucleoside bisphosphate metabolic process                    | 0      | 10     | 103     | 758     | 714     | 18 |
| GO:003 | purine nucleoside bisphosphate metabolic process                 | 18/171 | 99/232 | 0.00030 | 0.00337 | 0.00230 | 18 |

|        |                                                                             |        |        |         |         |         |    |
|--------|-----------------------------------------------------------------------------|--------|--------|---------|---------|---------|----|
| 4032   |                                                                             | 0      | 10     | 103     | 758     | 714     |    |
| GO:000 |                                                                             | 56/171 | 473/23 | 0.00030 | 0.00337 | 0.00230 |    |
| 2683   | negative regulation of immune system process                                | 0      | 210    | 122     | 758     | 714     | 56 |
| GO:005 |                                                                             | 43/171 | 337/23 | 0.00030 | 0.00341 | 0.00233 |    |
| 2548   | regulation of endopeptidase activity                                        | 0      | 210    | 551     | 913     | 553     | 43 |
| GO:005 |                                                                             | 24/171 | 152/23 | 0.00031 | 0.00349 | 0.00238 |    |
| 0709   | negative regulation of protein secretion                                    | 0      | 210    | 413     | 531     | 756     | 24 |
| GO:190 | positive regulation of protein modification by small protein conjugation or | 22/171 | 134/23 | 0.00031 | 0.00349 | 0.00238 |    |
| 3322   | removal                                                                     | 0      | 210    | 427     | 531     | 756     | 22 |
| GO:004 |                                                                             | 17/171 | 91/232 | 0.00031 | 0.00349 | 0.00238 |    |
| 6683   | response to organophosphorus                                                | 0      | 10     | 44      | 531     | 756     | 17 |
| GO:003 |                                                                             | 23/171 | 143/23 | 0.00031 | 0.00349 | 0.00238 |    |
| 1333   | negative regulation of protein complex assembly                             | 0      | 210    | 583     | 531     | 756     | 23 |
| GO:009 |                                                                             | 23/171 | 143/23 | 0.00031 | 0.00349 | 0.00238 |    |
| 0288   | negative regulation of cellular response to growth factor stimulus          | 0      | 210    | 583     | 531     | 756     | 23 |
| GO:003 |                                                                             | 14/171 | 67/232 | 0.00031 | 0.00349 | 0.00238 |    |
| 3692   | cellular polysaccharide biosynthetic process                                | 0      | 10     | 591     | 531     | 756     | 14 |
| GO:004 |                                                                             | 12/171 | 52/232 | 0.00031 | 0.00351 |         |    |
| 3268   | positive regulation of potassium ion transport                              | 0      | 10     | 815     | 352     | 0.0024  | 12 |
| GO:003 |                                                                             | 31/171 | 218/23 | 0.00032 | 0.00354 | 0.00241 |    |
| 0258   | lipid modification                                                          | 0      | 210    | 124     | 09      | 87      | 31 |
| GO:007 |                                                                             | 16/171 | 83/232 | 0.00032 | 0.00354 | 0.00242 |    |
| 1674   | mononuclear cell migration                                                  | 0      | 10     | 274     | 53      | 171     | 16 |
| GO:004 |                                                                             | 27/171 | 180/23 | 0.00032 | 0.00354 | 0.00242 |    |
| 8634   | regulation of muscle organ development                                      | 0      | 210    | 285     | 53      | 171     | 27 |
| GO:003 | negative regulation of protein polymerization                               | 15/171 | 75/232 | 0.00032 | 0.00355 | 0.00242 | 15 |

|        |                                                         |        |        |         |         |         |    |
|--------|---------------------------------------------------------|--------|--------|---------|---------|---------|----|
| 2272   |                                                         | 0      | 10     | 402     | 148     | 593     |    |
| GO:003 |                                                         | 29/171 | 199/23 | 0.00032 | 0.00355 | 0.00243 |    |
| 1396   | regulation of protein ubiquitination                    | 0      | 210    | 597     | 943     | 136     | 29 |
| GO:004 |                                                         | 29/171 | 199/23 | 0.00032 | 0.00355 | 0.00243 |    |
| 4242   | cellular lipid catabolic process                        | 0      | 210    | 597     | 943     | 136     | 29 |
| GO:001 |                                                         | 11/171 | 45/232 | 0.00032 | 0.00357 | 0.00243 |    |
| 0257   | NADH dehydrogenase complex assembly                     | 0      | 10     | 888     | 206     | 999     | 11 |
| GO:003 |                                                         | 11/171 | 45/232 | 0.00032 | 0.00357 | 0.00243 |    |
| 2981   | mitochondrial respiratory chain complex I assembly      | 0      | 10     | 888     | 206     | 999     | 11 |
| GO:004 |                                                         | 50/171 | 411/23 | 0.00032 | 0.00357 | 0.00243 |    |
| 5785   | positive regulation of cell adhesion                    | 0      | 210    | 957     | 206     | 999     | 50 |
| GO:005 |                                                         | 50/171 | 411/23 | 0.00032 | 0.00357 | 0.00243 |    |
| 2547   | regulation of peptidase activity                        | 0      | 210    | 957     | 206     | 999     | 50 |
| GO:000 |                                                         | 33/171 | 238/23 | 0.00033 | 0.00363 | 0.00248 |    |
| 6470   | protein dephosphorylation                               | 0      | 210    | 572     | 2       | 093     | 33 |
| GO:001 |                                                         | 30/171 | 209/23 | 0.00033 | 0.00365 | 0.00249 |    |
| 7038   | protein import                                          | 0      | 210    | 823     | 241     | 487     | 30 |
| GO:000 |                                                         | 25/171 | 162/23 | 0.00034 | 0.00366 | 0.00250 |    |
| 2792   | negative regulation of peptide secretion                | 0      | 210    | 109     | 297     | 209     | 25 |
| GO:000 |                                                         | 25/171 | 162/23 | 0.00034 | 0.00366 | 0.00250 |    |
| 7272   | ensheathment of neurons                                 | 0      | 210    | 109     | 297     | 209     | 25 |
| GO:000 |                                                         | 25/171 | 162/23 | 0.00034 | 0.00366 | 0.00250 |    |
| 8366   | axon ensheathment                                       | 0      | 210    | 109     | 297     | 209     | 25 |
| GO:003 |                                                         | 18/171 | 100/23 | 0.00034 | 0.00366 | 0.00250 |    |
| 0593   | neutrophil chemotaxis                                   | 0      | 210    | 223     | 846     | 584     | 18 |
| GO:003 | positive regulation of cellular amide metabolic process | 23/171 | 144/23 | 0.00035 | 0.00374 | 0.00255 | 23 |

|        |                                                       |        |        |         |         |         |    |
|--------|-------------------------------------------------------|--------|--------|---------|---------|---------|----|
| 4250   |                                                       | 0      | 210    | 014     | 635     | 904     |    |
| GO:007 |                                                       | 13/171 | 60/232 | 0.00035 | 0.00376 | 0.00257 |    |
| 1156   | regulation of cell cycle arrest                       | 0      | 10     | 265     | 632     | 268     | 13 |
| GO:000 |                                                       | 47/171 | 381/23 | 0.00035 | 0.00382 | 0.00261 |    |
| 1503   | ossification                                          | 0      | 210    | 859     | 282     | 127     | 47 |
| GO:004 |                                                       | 30/171 | 210/23 | 0.00036 | 0.00389 | 0.00265 |    |
| 6434   | organophosphate catabolic process                     | 0      | 210    | 736     | 275     | 904     | 30 |
| GO:000 |                                                       | 38/171 | 289/23 | 0.00036 | 0.00389 | 0.00265 |    |
| 6913   | nucleocytoplasmic transport                           | 0      | 210    | 892     | 275     | 904     | 38 |
| GO:005 |                                                       | 38/171 | 289/23 | 0.00036 | 0.00389 | 0.00265 |    |
| 1169   | nuclear transport                                     | 0      | 210    | 892     | 275     | 904     | 38 |
| GO:000 |                                                       | 35/171 | 259/23 | 0.00036 | 0.00389 | 0.00265 |    |
| 1818   | negative regulation of cytokine production            | 0      | 210    | 953     | 275     | 904     | 35 |
| GO:000 |                                                       |        | 32/232 | 0.00037 | 0.00389 | 0.00265 |    |
| 6505   | GPI anchor metabolic process                          | 9/1710 | 10     | 08      | 275     | 904     | 9  |
| GO:007 |                                                       | 28/171 | 191/23 | 0.00037 | 0.00389 | 0.00265 |    |
| 1804   | cellular potassium ion transport                      | 0      | 210    | 11      | 275     | 904     | 28 |
| GO:007 |                                                       | 28/171 | 191/23 | 0.00037 | 0.00389 | 0.00265 |    |
| 1805   | potassium ion transmembrane transport                 | 0      | 210    | 11      | 275     | 904     | 28 |
| GO:004 |                                                       | 16/171 | 84/232 | 0.00037 | 0.00389 | 0.00265 |    |
| 5913   | positive regulation of carbohydrate metabolic process | 0      | 10     | 182     | 275     | 904     | 16 |
| GO:006 |                                                       | 16/171 | 84/232 | 0.00037 | 0.00389 | 0.00265 |    |
| 0420   | regulation of heart growth                            | 0      | 10     | 182     | 275     | 904     | 16 |
| GO:190 |                                                       | 16/171 | 84/232 | 0.00037 | 0.00389 | 0.00265 |    |
| 1379   | regulation of potassium ion transmembrane transport   | 0      | 10     | 182     | 275     | 904     | 16 |
| GO:004 | sarcomere organization                                | 12/171 | 53/232 | 0.00038 | 0.00401 | 0.00274 | 12 |

|        |                                                          |        |        |         |         |         |    |
|--------|----------------------------------------------------------|--------|--------|---------|---------|---------|----|
| 5214   |                                                          | 0      | 10     | 402     | 328     | 137     |    |
| GO:000 |                                                          | 29/171 | 201/23 | 0.00038 | 0.00402 | 0.00274 |    |
| 2685   | regulation of leukocyte migration                        | 0      | 210    | 619     | 312     | 809     | 29 |
| GO:001 |                                                          | 27/171 | 182/23 | 0.00038 | 0.00402 | 0.00274 |    |
| 6331   | morphogenesis of embryonic epithelium                    | 0      | 210    | 634     | 312     | 809     | 27 |
| GO:004 |                                                          | 23/171 | 145/23 | 0.00038 | 0.00402 | 0.00275 |    |
| 5216   | cell-cell junction organization                          | 0      | 210    | 767     | 852     | 178     | 23 |
| GO:005 |                                                          | 18/171 | 101/23 | 0.00038 | 0.00402 | 0.00275 |    |
| 1651   | maintenance of location in cell                          | 0      | 210    | 823     | 852     | 178     | 18 |
| GO:000 |                                                          | 50/171 | 414/23 | 0.00039 | 0.00404 | 0.00276 |    |
| 7265   | Ras protein signal transduction                          | 0      | 210    | 062     | 534     | 327     | 50 |
| GO:004 |                                                          | 33/171 | 240/23 | 0.00039 | 0.00404 | 0.00276 |    |
| 6777   | protein autophosphorylation                              | 0      | 210    | 124     | 534     | 327     | 33 |
| GO:001 |                                                          | 43/171 | 341/23 | 0.00039 | 0.00405 | 0.00277 |    |
| 9221   | cytokine-mediated signaling pathway                      | 0      | 210    | 344     | 67      | 103     | 43 |
| GO:005 |                                                          | 57/171 | 489/23 | 0.00039 | 0.00405 | 0.00277 |    |
| 5074   | calcium ion homeostasis                                  | 0      | 210    | 681     | 67      | 103     | 57 |
| GO:004 |                                                          |        | 10/232 | 0.00039 | 0.00405 | 0.00277 |    |
| 2996   | regulation of Golgi to plasma membrane protein transport | 5/1710 | 10     | 717     | 67      | 103     | 5  |
| GO:004 |                                                          |        | 10/232 | 0.00039 | 0.00405 | 0.00277 |    |
| 3497   | regulation of protein heterodimerization activity        | 5/1710 | 10     | 717     | 67      | 103     | 5  |
| GO:007 |                                                          |        | 10/232 | 0.00039 | 0.00405 | 0.00277 |    |
| 0391   | response to lipoteichoic acid                            | 5/1710 | 10     | 717     | 67      | 103     | 5  |
| GO:007 |                                                          |        | 10/232 | 0.00039 | 0.00405 | 0.00277 |    |
| 1223   | cellular response to lipoteichoic acid                   | 5/1710 | 10     | 717     | 67      | 103     | 5  |
| GO:000 | heart morphogenesis                                      | 37/171 | 280/23 | 0.00039 | 0.00405 | 0.00277 | 37 |

|        |                                                                               |        |        |         |         |         |    |
|--------|-------------------------------------------------------------------------------|--------|--------|---------|---------|---------|----|
| 3007   |                                                                               | 0      | 210    | 72      | 67      | 103     |    |
| GO:000 |                                                                               |        | 26/232 | 0.00040 | 0.00407 | 0.00278 |    |
| 6779   | porphyrin-containing compound biosynthetic process                            | 8/1710 | 10     | 062     | 742     | 518     | 8  |
| GO:190 |                                                                               |        | 26/232 | 0.00040 | 0.00407 | 0.00278 |    |
| 0078   | positive regulation of cellular response to insulin stimulus                  | 8/1710 | 10     | 062     | 742     | 518     | 8  |
| GO:001 |                                                                               | 10/171 | 39/232 | 0.00040 | 0.00409 | 0.00279 |    |
| 0613   | positive regulation of cardiac muscle hypertrophy                             | 0      | 10     | 306     | 512     | 728     | 10 |
| GO:006 |                                                                               | 31/171 | 221/23 | 0.00040 | 0.00414 | 0.00282 |    |
| 1138   | morphogenesis of a branching epithelium                                       | 0      | 210    | 871     | 103     | 864     | 31 |
| GO:009 | positive regulation of transmembrane receptor protein serine/threonine kinase | 19/171 | 110/23 | 0.00040 | 0.00414 | 0.00282 |    |
| 0100   | signaling pathway                                                             | 0      | 210    | 9       | 103     | 864     | 19 |
| GO:003 |                                                                               | 25/171 | 164/23 | 0.00041 | 0.00416 | 0.00284 |    |
| 2680   | regulation of tumor necrosis factor production                                | 0      | 210    | 233     | 751     | 673     | 25 |
| GO:200 |                                                                               | 32/171 | 231/23 | 0.00041 | 0.00420 | 0.00286 |    |
| 1234   | negative regulation of apoptotic signaling pathway                            | 0      | 210    | 641     | 151     | 995     | 32 |
| GO:190 |                                                                               | 13/171 | 61/232 | 0.00041 | 0.00420 | 0.00287 |    |
| 3428   | positive regulation of reactive oxygen species biosynthetic process           | 0      | 10     | 832     | 621     | 316     | 13 |
| GO:190 |                                                                               | 13/171 | 61/232 | 0.00041 | 0.00420 | 0.00287 |    |
| 5207   | regulation of cardiocyte differentiation                                      | 0      | 10     | 832     | 621     | 316     | 13 |
| GO:005 |                                                                               | 24/171 | 155/23 | 0.00042 | 0.00423 | 0.00289 |    |
| 1494   | negative regulation of cytoskeleton organization                              | 0      | 210    | 202     | 619     | 363     | 24 |
| GO:003 |                                                                               | 22/171 | 137/23 | 0.00043 | 0.00432 | 0.00295 |    |
| 4341   | response to interferon-gamma                                                  | 0      | 210    | 153     | 419     | 375     | 22 |
| GO:000 |                                                                               | 14/171 | 69/232 | 0.00043 | 0.00433 | 0.00295 |    |
| 6949   | syncytium formation                                                           | 0      | 10     | 454     | 205     | 912     | 14 |
| GO:004 | positive regulation of fibroblast proliferation                               | 14/171 | 69/232 | 0.00043 | 0.00433 | 0.00295 | 14 |

|        |                                                                   |        |        |         |         |         |    |
|--------|-------------------------------------------------------------------|--------|--------|---------|---------|---------|----|
| 8146   |                                                                   | 0      | 10     | 454     | 205     | 912     |    |
| GO:005 |                                                                   | 14/171 | 69/232 | 0.00043 | 0.00433 | 0.00295 |    |
| 5117   | regulation of cardiac muscle contraction                          | 0      | 10     | 454     | 205     | 912     | 14 |
| GO:003 |                                                                   | 15/171 | 77/232 | 0.00043 | 0.00434 | 0.00296 |    |
| 3108   | mitochondrial respiratory chain complex assembly                  | 0      | 10     | 631     | 225     | 609     | 15 |
| GO:190 |                                                                   | 18/171 | 102/23 | 0.00043 | 0.00436 | 0.00298 |    |
| 5477   | positive regulation of protein localization to membrane           | 0      | 210    | 949     | 448     | 127     | 18 |
| GO:003 |                                                                   | 40/171 | 312/23 | 0.00044 | 0.00436 | 0.00298 |    |
| 2103   | positive regulation of response to external stimulus              | 0      | 210    | 159     | 448     | 127     | 40 |
| GO:006 |                                                                   |        | 15/232 | 0.00044 | 0.00436 | 0.00298 |    |
| 0396   | growth hormone receptor signaling pathway                         | 6/1710 | 10     | 377     | 448     | 127     | 6  |
| GO:007 |                                                                   |        | 15/232 | 0.00044 | 0.00436 | 0.00298 |    |
| 1378   | cellular response to growth hormone stimulus                      | 6/1710 | 10     | 377     | 448     | 127     | 6  |
| GO:190 |                                                                   |        | 15/232 | 0.00044 | 0.00436 | 0.00298 |    |
| 1077   | regulation of relaxation of muscle                                | 6/1710 | 10     | 377     | 448     | 127     | 6  |
| GO:190 |                                                                   |        | 15/232 | 0.00044 | 0.00436 | 0.00298 |    |
| 3818   | positive regulation of voltage-gated potassium channel activity   | 6/1710 | 10     | 377     | 448     | 127     | 6  |
| GO:200 |                                                                   |        | 15/232 | 0.00044 | 0.00436 | 0.00298 |    |
| 0095   | regulation of Wnt signaling pathway, planar cell polarity pathway | 6/1710 | 10     | 377     | 448     | 127     | 6  |
| GO:001 |                                                                   | 43/171 | 343/23 | 0.00044 | 0.00437 | 0.00298 |    |
| 0769   | regulation of cell morphogenesis involved in differentiation      | 0      | 210    | 536     | 279     | 694     | 43 |
| GO:005 |                                                                   | 39/171 | 302/23 | 0.00044 | 0.00438 | 0.00299 |    |
| 0714   | positive regulation of protein secretion                          | 0      | 210    | 751     | 652     | 632     | 39 |
| GO:003 |                                                                   | 36/171 | 272/23 | 0.00045 | 0.00448 | 0.00306 |    |
| 2409   | regulation of transporter activity                                | 0      | 210    | 819     | 147     | 118     | 36 |
| GO:002 | glial cell development                                            | 19/171 | 111/23 | 0.00045 | 0.00448 | 0.00306 | 19 |



|        |                                                               |        |        |         |         |         |    |
|--------|---------------------------------------------------------------|--------|--------|---------|---------|---------|----|
| 1782   |                                                               | 0      | 210    | 997     | 147     | 118     |    |
| GO:003 |                                                               | 12/171 | 54/232 | 0.00046 | 0.00448 | 0.00306 |    |
| 0199   | collagen fibril organization                                  | 0      | 10     | 103     | 147     | 118     | 12 |
| GO:005 |                                                               | 12/171 | 54/232 | 0.00046 | 0.00448 | 0.00306 |    |
| 5025   | positive regulation of cardiac muscle tissue development      | 0      | 10     | 103     | 147     | 118     | 12 |
| GO:008 |                                                               | 12/171 | 54/232 | 0.00046 | 0.00448 | 0.00306 |    |
| 6001   | cardiac muscle cell action potential                          | 0      | 10     | 103     | 147     | 118     | 12 |
| GO:003 |                                                               | 24/171 | 156/23 | 0.00046 | 0.00450 | 0.00307 |    |
| 4249   | negative regulation of cellular amide metabolic process       | 0      | 210    | 458     | 846     | 962     | 24 |
| GO:001 |                                                               | 30/171 | 213/23 | 0.00046 | 0.00453 | 0.00309 |    |
| 6054   | organic acid catabolic process                                | 0      | 210    | 85      | 141     | 53      | 30 |
| GO:004 |                                                               | 30/171 | 213/23 | 0.00046 | 0.00453 | 0.00309 |    |
| 6395   | carboxylic acid catabolic process                             | 0      | 210    | 85      | 141     | 53      | 30 |
| GO:000 |                                                               | 20/171 | 120/23 | 0.00047 | 0.00456 | 0.00311 |    |
| 2062   | chondrocyte differentiation                                   | 0      | 210    | 259     | 342     | 716     | 20 |
| GO:006 |                                                               |        | 33/232 | 0.00047 | 0.00459 | 0.00313 |    |
| 1842   | microtubule organizing center localization                    | 9/1710 | 10     | 68      | 645     | 972     | 9  |
| GO:001 |                                                               | 26/171 | 175/23 | 0.00047 | 0.00460 | 0.00314 |    |
| 0977   | negative regulation of neuron projection development          | 0      | 210    | 933     | 676     | 676     | 26 |
| GO:000 |                                                               | 28/171 | 194/23 | 0.00047 | 0.00460 | 0.00314 |    |
| 6006   | glucose metabolic process                                     | 0      | 210    | 944     | 676     | 676     | 28 |
| GO:004 |                                                               | 11/171 | 47/232 | 0.00049 | 0.00470 | 0.00321 |    |
| 5429   | positive regulation of nitric oxide biosynthetic process      | 0      | 10     | 244     | 11      | 12      | 11 |
| GO:006 |                                                               | 13/171 | 62/232 | 0.00049 | 0.00470 | 0.00321 |    |
| 0393   | regulation of pathway-restricted SMAD protein phosphorylation | 0      | 10     | 407     | 11      | 12      | 13 |
| GO:007 | protein trimerization                                         | 13/171 | 62/232 | 0.00049 | 0.00470 | 0.00321 | 13 |

|        |                                                                       |        |        |         |         |         |    |
|--------|-----------------------------------------------------------------------|--------|--------|---------|---------|---------|----|
| 0206   |                                                                       | 0      | 10     | 407     | 11      | 12      |    |
| GO:004 |                                                                       | 54/171 | 461/23 | 0.00049 | 0.00470 | 0.00321 |    |
| 5666   | positive regulation of neuron differentiation                         | 0      | 210    | 476     | 11      | 12      | 54 |
| GO:190 |                                                                       | 25/171 | 166/23 | 0.00049 | 0.00470 | 0.00321 |    |
| 3555   | regulation of tumor necrosis factor superfamily cytokine production   | 0      | 210    | 631     | 11      | 12      | 25 |
| GO:000 |                                                                       | 18/171 | 103/23 | 0.00049 | 0.00470 | 0.00321 |    |
| 2224   | toll-like receptor signaling pathway                                  | 0      | 210    | 65      | 11      | 12      | 18 |
| GO:000 |                                                                       | 18/171 | 103/23 | 0.00049 | 0.00470 | 0.00321 |    |
| 9408   | response to heat                                                      | 0      | 210    | 65      | 11      | 12      | 18 |
| GO:003 |                                                                       | 18/171 | 103/23 | 0.00049 | 0.00470 | 0.00321 |    |
| 5601   | protein deacylation                                                   | 0      | 210    | 65      | 11      | 12      | 18 |
| GO:009 |                                                                       | 18/171 | 103/23 | 0.00049 | 0.00470 | 0.00321 |    |
| 8732   | macromolecule deacylation                                             | 0      | 210    | 65      | 11      | 12      | 18 |
| GO:001 |                                                                       | 27/171 | 185/23 | 0.00050 | 0.00474 | 0.00323 |    |
| 0770   | positive regulation of cell morphogenesis involved in differentiation | 0      | 210    | 219     | 052     | 814     | 27 |
| GO:001 |                                                                       | 10/171 | 40/232 | 0.00050 | 0.00474 | 0.00323 |    |
| 4742   | positive regulation of muscle hypertrophy                             | 0      | 10     | 229     | 052     | 814     | 10 |
| GO:004 |                                                                       | 15/171 | 78/232 | 0.00050 | 0.00474 | 0.00324 |    |
| 6785   | microtubule polymerization                                            | 0      | 10     | 395     | 847     | 356     | 15 |
| GO:001 |                                                                       | 14/171 | 70/232 | 0.00050 | 0.00476 | 0.00325 |    |
| 9915   | lipid storage                                                         | 0      | 10     | 687     | 834     | 714     | 14 |
| GO:006 |                                                                       | 24/171 | 157/23 | 0.00051 | 0.00479 | 0.00327 |    |
| 0402   | calcium ion transport into cytosol                                    | 0      | 210    | 085     | 805     | 743     | 24 |
| GO:003 |                                                                       | 19/171 | 112/23 | 0.00051 | 0.00483 | 0.00330 |    |
| 1398   | positive regulation of protein ubiquitination                         | 0      | 210    | 634     | 411     | 206     | 19 |
| GO:007 | monocarboxylic acid catabolic process                                 | 19/171 | 112/23 | 0.00051 | 0.00483 | 0.00330 | 19 |

|        |                                                                         |        |        |         |         |         |    |
|--------|-------------------------------------------------------------------------|--------|--------|---------|---------|---------|----|
| 2329   |                                                                         | 0      | 210    | 634     | 411     | 206     |    |
| GO:003 |                                                                         | 26/171 | 176/23 | 0.00052 | 0.00489 | 0.00334 |    |
| 5148   | tube formation                                                          | 0      | 210    | 379     | 593     | 429     | 26 |
| GO:000 |                                                                         | 34/171 | 254/23 | 0.00052 | 0.00493 | 0.00337 |    |
| 7626   | locomotory behavior                                                     | 0      | 210    | 894     | 622     | 181     | 34 |
| GO:000 |                                                                         |        | 27/232 | 0.00053 | 0.00494 | 0.00337 |    |
| 9394   | 2'-deoxyribonucleotide metabolic process                                | 8/1710 | 10     | 28      | 067     | 485     | 8  |
| GO:001 |                                                                         |        | 27/232 | 0.00053 | 0.00494 | 0.00337 |    |
| 9692   | deoxyribose phosphate metabolic process                                 | 8/1710 | 10     | 28      | 067     | 485     | 8  |
| GO:190 |                                                                         |        | 27/232 | 0.00053 | 0.00494 | 0.00337 |    |
| 1018   | positive regulation of potassium ion transmembrane transporter activity | 8/1710 | 10     | 28      | 067     | 485     | 8  |
| GO:200 |                                                                         |        | 27/232 | 0.00053 | 0.00494 | 0.00337 |    |
| 0727   | positive regulation of cardiac muscle cell differentiation              | 8/1710 | 10     | 28      | 067     | 485     | 8  |
| GO:000 |                                                                         |        | 21/232 | 0.00053 | 0.00497 | 0.00339 |    |
| 6783   | heme biosynthetic process                                               | 7/1710 | 10     | 855     | 03      | 509     | 7  |
| GO:000 |                                                                         |        | 21/232 | 0.00053 | 0.00497 | 0.00339 |    |
| 8053   | mitochondrial fusion                                                    | 7/1710 | 10     | 855     | 03      | 509     | 7  |
| GO:004 |                                                                         |        | 21/232 | 0.00053 | 0.00497 | 0.00339 |    |
| 6716   | muscle cell cellular homeostasis                                        | 7/1710 | 10     | 855     | 03      | 509     | 7  |
| GO:003 |                                                                         | 25/171 | 167/23 | 0.00054 | 0.00500 | 0.00342 |    |
| 2640   | tumor necrosis factor production                                        | 0      | 210    | 365     | 95      | 186     | 25 |
| GO:000 |                                                                         | 12/171 | 55/232 | 0.00055 | 0.00505 | 0.00344 |    |
| 7528   | neuromuscular junction development                                      | 0      | 10     | 066     | 02      | 966     | 12 |
| GO:001 |                                                                         | 12/171 | 55/232 | 0.00055 | 0.00505 | 0.00344 |    |
| 0665   | regulation of cardiac muscle cell apoptotic process                     | 0      | 10     | 066     | 02      | 966     | 12 |
| GO:001 | negative regulation of mitochondrion organization                       | 12/171 | 55/232 | 0.00055 | 0.00505 | 0.00344 | 12 |

|        |                                                                |        |        |         |         |         |    |
|--------|----------------------------------------------------------------|--------|--------|---------|---------|---------|----|
| 0823   |                                                                | 0      | 10     | 066     | 02      | 966     |    |
| GO:000 |                                                                | 51/171 | 431/23 | 0.00055 | 0.00507 | 0.00346 |    |
| 1558   | regulation of cell growth                                      | 0      | 210    | 382     | 122     | 403     | 51 |
| GO:005 |                                                                | 41/171 | 326/23 | 0.00055 | 0.00511 | 0.00349 |    |
| 0890   | cognition                                                      | 0      | 210    | 931     | 34      | 284     | 41 |
| GO:003 |                                                                | 13/171 | 63/232 | 0.00058 | 0.00530 | 0.00362 |    |
| 0330   | DNA damage response, signal transduction by p53 class mediator | 0      | 10     | 113     | 459     | 343     | 13 |
| GO:001 |                                                                | 14/171 | 71/232 | 0.00058 | 0.00536 | 0.00366 |    |
| 0611   | regulation of cardiac muscle hypertrophy                       | 0      | 10     | 919     | 89      | 737     | 14 |
| GO:009 |                                                                | 21/171 | 131/23 | 0.00059 | 0.00536 | 0.00366 |    |
| 0316   | positive regulation of intracellular protein transport         | 0      | 210    | 001     | 89      | 737     | 21 |
| GO:200 |                                                                | 25/171 | 168/23 | 0.00059 | 0.00539 | 0.00368 |    |
| 1257   | regulation of cation channel activity                          | 0      | 210    | 49      | 72      | 67      | 25 |
| GO:000 |                                                                | 11/171 | 48/232 | 0.00059 | 0.00539 | 0.00368 |    |
| 7520   | myoblast fusion                                                | 0      | 10     | 681     | 72      | 67      | 11 |
| GO:009 |                                                                | 11/171 | 48/232 | 0.00059 | 0.00539 | 0.00368 |    |
| 0659   | walking behavior                                               | 0      | 10     | 681     | 72      | 67      | 11 |
| GO:190 |                                                                | 11/171 | 48/232 | 0.00059 | 0.00539 | 0.00368 |    |
| 4407   | positive regulation of nitric oxide metabolic process          | 0      | 10     | 681     | 72      | 67      | 11 |
| GO:000 |                                                                |        | 34/232 | 0.00060 | 0.00547 | 0.00374 |    |
| 2931   | response to ischemia                                           | 9/1710 | 10     | 645     | 583     | 04      | 9  |
| GO:003 |                                                                | 33/171 | 246/23 | 0.00060 | 0.00549 | 0.00375 |    |
| 1334   | positive regulation of protein complex assembly                | 0      | 210    | 973     | 701     | 487     | 33 |
| GO:003 |                                                                | 48/171 | 401/23 | 0.00061 | 0.00553 | 0.00377 |    |
| 0099   | myeloid cell differentiation                                   | 0      | 210    | 559     | 282     | 933     | 48 |
| GO:004 | myelination                                                    | 24/171 | 159/23 | 0.00061 | 0.00553 | 0.00377 | 24 |

|        |                                                            |        |        |         |         |         |    |
|--------|------------------------------------------------------------|--------|--------|---------|---------|---------|----|
| 2552   |                                                            | 0      | 210    | 56      | 282     | 933     |    |
| GO:001 |                                                            | 53/171 | 455/23 | 0.00063 | 0.00567 | 0.00387 |    |
| 5672   | monovalent inorganic cation transport                      | 0      | 210    | 257     | 662     | 756     | 53 |
| GO:200 |                                                            | 19/171 | 114/23 | 0.00064 | 0.00579 | 0.00396 |    |
| 0045   | regulation of G1/S transition of mitotic cell cycle        | 0      | 210    | 723     | 927     | 134     | 19 |
| GO:003 |                                                            | 32/171 | 237/23 | 0.00065 | 0.00584 | 0.00399 |    |
| 4976   | response to endoplasmic reticulum stress                   | 0      | 210    | 348     | 632     | 347     | 32 |
| GO:190 |                                                            | 12/171 | 56/232 | 0.00065 | 0.00584 | 0.00399 |    |
| 5517   | macrophage migration                                       | 0      | 10     | 448     | 632     | 347     | 12 |
| GO:006 |                                                            |        | 16/232 | 0.00066 | 0.00593 | 0.00405 |    |
| 0766   | negative regulation of androgen receptor signaling pathway | 6/1710 | 10     | 591     | 935     | 702     | 6  |
| GO:001 |                                                            | 17/171 | 97/232 | 0.00067 | 0.00604 | 0.00412 |    |
| 0595   | positive regulation of endothelial cell migration          | 0      | 10     | 966     | 346     | 814     | 17 |
| GO:003 |                                                            | 17/171 | 97/232 | 0.00067 | 0.00604 | 0.00412 |    |
| 0510   | regulation of BMP signaling pathway                        | 0      | 10     | 966     | 346     | 814     | 17 |
| GO:005 |                                                            | 13/171 | 64/232 | 0.00068 | 0.00604 | 0.00412 |    |
| 1926   | negative regulation of calcium ion transport               | 0      | 10     | 078     | 422     | 865     | 13 |
| GO:000 |                                                            |        | 11/232 | 0.00068 | 0.00604 | 0.00412 |    |
| 9265   | 2'-deoxyribonucleotide biosynthetic process                | 5/1710 | 10     | 397     | 503     | 921     | 5  |
| GO:004 |                                                            |        | 11/232 | 0.00068 | 0.00604 | 0.00412 |    |
| 6385   | deoxyribose phosphate biosynthetic process                 | 5/1710 | 10     | 397     | 503     | 921     | 5  |
| GO:009 |                                                            |        | 11/232 | 0.00068 | 0.00604 | 0.00412 |    |
| 0281   | negative regulation of calcium ion import                  | 5/1710 | 10     | 397     | 503     | 921     | 5  |
| GO:005 |                                                            |        | 28/232 | 0.00069 | 0.00616 | 0.00420 |    |
| 1194   | positive regulation of cofactor metabolic process          | 8/1710 | 10     | 814     | 093     | 838     | 8  |
| GO:007 | tumor necrosis factor superfamily cytokine production      | 25/171 | 170/23 | 0.00071 | 0.00625 | 0.00427 | 25 |

|        |                                                         |        |        |         |         |         |    |
|--------|---------------------------------------------------------|--------|--------|---------|---------|---------|----|
| 1706   |                                                         | 0      | 210    | 018     | 775     | 452     |    |
| GO:000 |                                                         | 21/171 | 133/23 | 0.00072 | 0.00636 | 0.00434 |    |
| 1837   | epithelial to mesenchymal transition                    | 0      | 210    | 358     | 617     | 858     | 21 |
| GO:000 |                                                         | 16/171 | 89/232 | 0.00072 | 0.00637 | 0.00435 |    |
| 7229   | integrin-mediated signaling pathway                     | 0      | 10     | 525     | 131     | 209     | 16 |
| GO:004 |                                                         | 37/171 | 289/23 | 0.00072 | 0.00637 | 0.00435 |    |
| 5088   | regulation of innate immune response                    | 0      | 210    | 711     | 806     | 669     | 37 |
| GO:001 |                                                         |        | 22/232 | 0.00073 | 0.00646 | 0.00441 |    |
| 4850   | response to muscle activity                             | 7/1710 | 10     | 995     | 578     | 662     | 7  |
| GO:003 |                                                         |        | 22/232 | 0.00073 | 0.00646 | 0.00441 |    |
| 4405   | response to fluid shear stress                          | 7/1710 | 10     | 995     | 578     | 662     | 7  |
| GO:001 |                                                         | 44/171 | 362/23 | 0.00074 | 0.00646 | 0.00441 |    |
| 0976   | positive regulation of neuron projection development    | 0      | 210    | 043     | 578     | 662     | 44 |
| GO:000 |                                                         | 41/171 | 331/23 | 0.00075 | 0.00661 | 0.00452 |    |
| 2793   | positive regulation of peptide secretion                | 0      | 210    | 899     | 796     | 057     | 41 |
| GO:001 |                                                         | 10/171 | 42/232 | 0.00076 | 0.00662 | 0.00452 |    |
| 0559   | regulation of glycoprotein biosynthetic process         | 0      | 10     | 179     | 799     | 741     | 10 |
| GO:004 |                                                         |        | 35/232 | 0.00076 | 0.00662 | 0.00452 |    |
| 5940   | positive regulation of steroid metabolic process        | 9/1710 | 10     | 355     | 799     | 741     | 9  |
| GO:007 |                                                         |        | 35/232 | 0.00076 | 0.00662 | 0.00452 |    |
| 0873   | regulation of glycogen metabolic process                | 9/1710 | 10     | 355     | 799     | 741     | 9  |
| GO:003 |                                                         | 17/171 | 98/232 | 0.00076 | 0.00664 | 0.00454 |    |
| 2760   | positive regulation of tumor necrosis factor production | 0      | 10     | 685     | 678     | 025     | 17 |
| GO:001 |                                                         | 12/171 | 57/232 | 0.00077 | 0.00669 | 0.00457 |    |
| 6101   | diterpenoid metabolic process                           | 0      | 10     | 421     | 07      | 025     | 12 |
| GO:004 | positive regulation of organ growth                     | 12/171 | 57/232 | 0.00077 | 0.00669 | 0.00457 | 12 |

|        |                                                                              |        |        |         |         |         |    |
|--------|------------------------------------------------------------------------------|--------|--------|---------|---------|---------|----|
| 6622   |                                                                              | 0      | 10     | 421     | 07      | 025     |    |
| GO:000 |                                                                              | 54/171 | 470/23 | 0.00078 | 0.00673 | 0.00460 |    |
| 7409   | axonogenesis                                                                 | 0      | 210    | 103     | 973     | 374     | 54 |
| GO:003 |                                                                              | 28/171 | 200/23 | 0.00078 | 0.00674 | 0.00460 |    |
| 2388   | positive regulation of intracellular transport                               | 0      | 210    | 229     | 065     | 437     | 28 |
| GO:007 |                                                                              | 36/171 | 280/23 | 0.00078 | 0.00677 | 0.00462 |    |
| 0588   | calcium ion transmembrane transport                                          | 0      | 210    | 737     | 436     | 74      | 36 |
| GO:001 |                                                                              | 18/171 | 107/23 | 0.00079 | 0.00681 | 0.00465 |    |
| 4074   | response to purine-containing compound                                       | 0      | 210    | 298     | 264     | 355     | 18 |
| GO:005 |                                                                              | 21/171 | 134/23 | 0.00079 | 0.00684 | 0.00467 |    |
| 1928   | positive regulation of calcium ion transport                                 | 0      | 210    | 964     | 972     | 888     | 21 |
| GO:005 |                                                                              | 21/171 | 134/23 | 0.00079 | 0.00684 | 0.00467 |    |
| 5123   | digestive system development                                                 | 0      | 210    | 964     | 972     | 888     | 21 |
| GO:004 |                                                                              | 34/171 | 260/23 | 0.00080 | 0.00688 | 0.00470 |    |
| 5665   | negative regulation of neuron differentiation                                | 0      | 210    | 46      | 212     | 101     | 34 |
| GO:001 |                                                                              | 24/171 | 162/23 | 0.00080 | 0.00689 | 0.00471 |    |
| 0952   | positive regulation of peptidase activity                                    | 0      | 210    | 772     | 871     | 234     | 24 |
| GO:000 |                                                                              | 32/171 | 240/23 | 0.00081 | 0.00692 | 0.00472 |    |
| 1763   | morphogenesis of a branching structure                                       | 0      | 210    | 149     | 074     | 739     | 32 |
| GO:005 |                                                                              | 47/171 | 396/23 | 0.00083 | 0.00712 | 0.00486 |    |
| 1090   | regulation of DNA-binding transcription factor activity                      | 0      | 210    | 71      | 201     | 487     | 47 |
| GO:003 |                                                                              | 23/171 | 153/23 | 0.00083 | 0.00712 | 0.00486 |    |
| 2675   | regulation of interleukin-6 production                                       | 0      | 210    | 752     | 201     | 487     | 23 |
| GO:190 |                                                                              | 17/171 | 99/232 | 0.00086 | 0.00733 | 0.00500 |    |
| 3557   | positive regulation of tumor necrosis factor superfamily cytokine production | 0      | 10     | 342     | 154     | 799     | 17 |
| GO:000 | learning or memory                                                           | 37/171 | 292/23 | 0.00088 | 0.00747 | 0.00510 | 37 |

|        |                                                              |        |        |         |         |         |    |
|--------|--------------------------------------------------------------|--------|--------|---------|---------|---------|----|
| 7611   |                                                              | 0      | 210    | 144     | 098     | 324     |    |
| GO:004 |                                                              | 24/171 | 163/23 | 0.00088 | 0.00747 | 0.00510 |    |
| 8660   | regulation of smooth muscle cell proliferation               | 0      | 210    | 24      | 098     | 324     | 24 |
| GO:190 |                                                              | 18/171 | 108/23 | 0.00088 | 0.00749 | 0.00511 |    |
| 0006   | positive regulation of dendrite development                  | 0      | 210    | 726     | 044     | 654     | 18 |
| GO:190 |                                                              | 18/171 | 108/23 | 0.00088 | 0.00749 | 0.00511 |    |
| 4659   | glucose transmembrane transport                              | 0      | 210    | 726     | 044     | 654     | 18 |
| GO:005 |                                                              | 19/171 | 117/23 | 0.00089 |         | 0.00516 |    |
| 1701   | interaction with host                                        | 0      | 210    | 68      | 0.00756 | 405     | 19 |
| GO:000 |                                                              |        | 29/232 | 0.00090 | 0.00759 | 0.00518 |    |
| 2092   | positive regulation of receptor internalization              | 8/1710 | 10     | 241     | 634     | 888     | 8  |
| GO:000 |                                                              | 54/171 | 473/23 | 0.00090 | 0.00760 | 0.00519 |    |
| 6874   | cellular calcium ion homeostasis                             | 0      | 210    | 496     | 687     | 606     | 54 |
| GO:001 |                                                              | 14/171 | 74/232 | 0.00090 | 0.00761 | 0.00520 |    |
| 4743   | regulation of muscle hypertrophy                             | 0      | 10     | 724     | 508     | 167     | 14 |
| GO:006 |                                                              | 12/171 | 58/232 | 0.00091 | 0.00764 | 0.00521 |    |
| 1337   | cardiac conduction                                           | 0      | 10     | 168     | 136     | 963     | 12 |
| GO:000 |                                                              | 23/171 | 154/23 | 0.00091 | 0.00767 | 0.00524 |    |
| 1838   | embryonic epithelial tube formation                          | 0      | 210    | 734     | 78      | 452     | 23 |
| GO:002 |                                                              | 34/171 | 262/23 | 0.00092 | 0.00769 | 0.00525 |    |
| 2898   | regulation of transmembrane transporter activity             | 0      | 210    | 113     | 847     | 864     | 34 |
| GO:004 |                                                              | 10/171 | 43/232 | 0.00092 | 0.00773 | 0.00528 |    |
| 0018   | positive regulation of multicellular organism growth         | 0      | 10     | 791     | 3       | 222     | 10 |
| GO:190 |                                                              | 10/171 | 43/232 | 0.00092 | 0.00773 | 0.00528 |    |
| 1381   | positive regulation of potassium ion transmembrane transport | 0      | 10     | 791     | 3       | 222     | 10 |
| GO:000 | receptor-mediated endocytosis                                | 30/171 | 222/23 | 0.00093 | 0.00777 | 0.00530 | 30 |



|        |                                                                |        |        |         |         |         |    |
|--------|----------------------------------------------------------------|--------|--------|---------|---------|---------|----|
| 6898   |                                                                | 0      | 210    | 381     | 108     | 823     |    |
| GO:004 |                                                                | 52/171 | 452/23 | 0.00093 | 0.00779 | 0.00532 |    |
| 5786   | negative regulation of cell cycle                              | 0      | 210    | 851     | 914     | 74      | 52 |
| GO:003 |                                                                |        | 36/232 | 0.00095 | 0.00789 | 0.00539 |    |
| 4205   | amyloid-beta formation                                         | 9/1710 | 10     | 225     | 08      | 001     | 9  |
| GO:190 |                                                                |        | 36/232 | 0.00095 | 0.00789 | 0.00539 |    |
| 5209   | positive regulation of cardiocyte differentiation              | 9/1710 | 10     | 225     | 08      | 001     | 9  |
| GO:000 |                                                                | 24/171 | 164/23 | 0.00096 | 0.00796 | 0.00544 |    |
| 2218   | activation of innate immune response                           | 0      | 210    | 298     | 506     | 074     | 24 |
| GO:004 |                                                                |        | 17/232 | 0.00096 | 0.00796 | 0.00544 |    |
| 5989   | positive regulation of striated muscle contraction             | 6/1710 | 10     | 53      | 506     | 074     | 6  |
| GO:200 |                                                                |        | 17/232 | 0.00096 | 0.00796 | 0.00544 |    |
| 1170   | negative regulation of ATP biosynthetic process                | 6/1710 | 10     | 53      | 506     | 074     | 6  |
| GO:000 |                                                                | 21/171 | 136/23 | 0.00097 | 0.00800 | 0.00546 |    |
| 9791   | post-embryonic development                                     | 0      | 210    | 267     | 326     | 683     | 21 |
| GO:009 |                                                                | 21/171 | 136/23 | 0.00097 | 0.00800 | 0.00546 |    |
| 7553   | calcium ion transmembrane import into cytosol                  | 0      | 210    | 267     | 326     | 683     | 21 |
| GO:000 |                                                                | 18/171 | 109/23 | 0.00099 | 0.00814 | 0.00556 |    |
| 8645   | hexose transmembrane transport                                 | 0      | 210    | 096     | 233     | 183     | 18 |
| GO:004 |                                                                | 19/171 | 118/23 | 0.00099 | 0.00816 | 0.00557 |    |
| 6620   | regulation of organ growth                                     | 0      | 210    | 651     | 525     | 748     | 19 |
| GO:190 |                                                                |        | 23/232 | 0.00099 | 0.00816 | 0.00557 |    |
| 3077   | negative regulation of protein localization to plasma membrane | 7/1710 | 10     | 655     | 525     | 748     | 7  |
| GO:004 |                                                                | 45/171 | 378/23 | 0.00100 | 0.00819 | 0.00559 |    |
| 2176   | regulation of protein catabolic process                        | 0      | 210    | 169     | 591     | 842     | 45 |
| GO:005 | import into nucleus                                            | 23/171 | 155/23 | 0.00100 | 0.00819 | 0.00559 | 23 |

|        |                                                      |        |        |         |         |         |    |
|--------|------------------------------------------------------|--------|--------|---------|---------|---------|----|
| 1170   |                                                      | 0      | 210    | 365     | 702     | 918     |    |
| GO:001 |                                                      | 30/171 | 223/23 | 0.00100 | 0.00819 | 0.00559 |    |
| 9318   | hexose metabolic process                             | 0      | 210    | 463     | 702     | 918     | 30 |
| GO:003 |                                                      | 11/171 | 51/232 | 0.00102 | 0.00834 | 0.00570 |    |
| 1103   | axon regeneration                                    | 0      | 10     | 598     | 791     | 225     | 11 |
| GO:003 |                                                      | 11/171 | 51/232 | 0.00102 | 0.00834 | 0.00570 |    |
| 2355   | response to estradiol                                | 0      | 10     | 598     | 791     | 225     | 11 |
| GO:003 |                                                      | 14/171 | 75/232 | 0.00104 | 0.00845 | 0.00577 |    |
| 2507   | maintenance of protein location in cell              | 0      | 10     | 109     | 906     | 818     | 14 |
| GO:003 |                                                      | 16/171 | 92/232 | 0.00105 | 0.00853 | 0.00582 |    |
| 0838   | positive regulation of actin filament polymerization | 0      | 10     | 157     | 235     | 824     | 16 |
| GO:003 |                                                      | 33/171 | 254/23 | 0.00106 | 0.00862 | 0.00588 |    |
| 2412   | regulation of ion transmembrane transporter activity | 0      | 210    | 458     | 114     | 889     | 33 |
| GO:001 |                                                      | 12/171 | 59/232 | 0.00106 | 0.00862 | 0.00588 |    |
| 0659   | cardiac muscle cell apoptotic process                | 0      | 10     | 888     | 114     | 889     | 12 |
| GO:000 |                                                      | 13/171 | 67/232 | 0.00106 | 0.00862 | 0.00588 |    |
| 0768   | syncytium formation by plasma membrane fusion        | 0      | 10     | 99      | 114     | 889     | 13 |
| GO:004 |                                                      | 13/171 | 67/232 | 0.00106 | 0.00862 | 0.00588 |    |
| 8678   | response to axon injury                              | 0      | 10     | 99      | 114     | 889     | 13 |
| GO:014 |                                                      | 13/171 | 67/232 | 0.00106 | 0.00862 | 0.00588 |    |
| 0253   | cell-cell fusion                                     | 0      | 10     | 99      | 114     | 889     | 13 |
| GO:005 |                                                      | 17/171 | 101/23 | 0.00108 | 0.00875 | 0.00597 |    |
| 5024   | regulation of cardiac muscle tissue development      | 0      | 210    | 794     | 449     | 998     | 17 |
| GO:190 |                                                      | 20/171 | 128/23 | 0.00109 | 0.00878 | 0.00600 |    |
| 2806   | regulation of cell cycle G1/S phase transition       | 0      | 210    | 325     | 506     | 086     | 20 |
| GO:000 | steroid biosynthetic process                         | 23/171 | 156/23 | 0.00109 | 0.00880 | 0.00601 | 23 |

|        |                                                                                 |        |        |         |         |         |    |
|--------|---------------------------------------------------------------------------------|--------|--------|---------|---------|---------|----|
| 6694   |                                                                                 | 0      | 210    | 687     | 206     | 247     |    |
| GO:000 |                                                                                 |        | 12/232 | 0.00110 | 0.00881 | 0.00602 |    |
| 9219   | pyrimidine deoxyribonucleotide metabolic process                                | 5/1710 | 10     | 154     | 537     | 156     | 5  |
| GO:003 |                                                                                 |        | 12/232 | 0.00110 | 0.00881 | 0.00602 |    |
| 2048   | cardiolipin metabolic process                                                   | 5/1710 | 10     | 154     | 537     | 156     | 5  |
| GO:199 |                                                                                 | 19/171 | 119/23 | 0.00110 | 0.00883 | 0.00603 |    |
| 0266   | neutrophil migration                                                            | 0      | 210    | 556     | 54      | 525     | 19 |
| GO:000 |                                                                                 | 42/171 | 348/23 | 0.00110 | 0.00884 | 0.00604 |    |
| 6644   | phospholipid metabolic process                                                  | 0      | 210    | 824     | 472     | 161     | 42 |
| GO:004 |                                                                                 | 34/171 | 265/23 | 0.00112 | 0.00895 | 0.00611 |    |
| 2593   | glucose homeostasis                                                             | 0      | 210    | 363     | 534     | 717     | 34 |
| GO:000 |                                                                                 | 27/171 | 195/23 | 0.00113 | 0.00904 | 0.00618 |    |
| 7266   | Rho protein signal transduction                                                 | 0      | 210    | 689     | 868     | 093     | 27 |
| GO:000 |                                                                                 | 22/171 | 147/23 | 0.00113 | 0.00905 | 0.00618 |    |
| 8643   | carbohydrate transport                                                          | 0      | 210    | 983     | 967     | 844     | 22 |
| GO:003 |                                                                                 | 28/171 | 205/23 | 0.00115 | 0.00911 | 0.00622 |    |
| 1345   | negative regulation of cell projection organization                             | 0      | 210    | 088     | 842     | 857     | 28 |
| GO:005 |                                                                                 |        | 30/232 | 0.00115 | 0.00911 | 0.00622 |    |
| 1085   | chaperone cofactor-dependent protein refolding                                  | 8/1710 | 10     | 19      | 842     | 857     | 8  |
| GO:006 |                                                                                 |        | 30/232 | 0.00115 | 0.00911 | 0.00622 |    |
| 0143   | positive regulation of syncytium formation by plasma membrane fusion            | 8/1710 | 10     | 19      | 842     | 857     | 8  |
| GO:003 |                                                                                 | 44/171 | 370/23 | 0.00115 | 0.00914 | 0.00624 |    |
| 1349   | positive regulation of defense response                                         | 0      | 210    | 702     | 653     | 777     | 44 |
| GO:004 |                                                                                 | 42/171 | 349/23 | 0.00117 | 0.00925 | 0.00632 |    |
| 5861   | negative regulation of proteolysis                                              | 0      | 210    | 233     | 51      | 193     | 42 |
| GO:003 | negative regulation of intracellular steroid hormone receptor signaling pathway | 9/1710 | 37/232 | 0.00117 | 0.00927 | 0.00633 | 9  |

|        |                                                                                  |        |        |         |         |         |    |
|--------|----------------------------------------------------------------------------------|--------|--------|---------|---------|---------|----|
| 3144   |                                                                                  |        | 10     | 705     | 98      | 88      |    |
| GO:004 |                                                                                  | 16/171 | 93/232 | 0.00118 | 0.00930 | 0.00635 |    |
| 5445   | myoblast differentiation                                                         | 0      | 10     | 482     | 342     | 494     | 16 |
| GO:004 |                                                                                  | 16/171 | 93/232 | 0.00118 | 0.00930 | 0.00635 |    |
| 6889   | positive regulation of lipid biosynthetic process                                | 0      | 10     | 482     | 342     | 494     | 16 |
| GO:005 | modification of morphology or physiology of other organism involved in symbiotic | 16/171 | 93/232 | 0.00118 | 0.00930 | 0.00635 |    |
| 1817   | interaction                                                                      | 0      | 10     | 482     | 342     | 494     | 16 |
| GO:000 |                                                                                  | 14/171 | 76/232 | 0.00119 | 0.00932 | 0.00637 |    |
| 7045   | cell-substrate adherens junction assembly                                        | 0      | 10     | 114     | 795     | 17      | 14 |
| GO:004 |                                                                                  | 14/171 | 76/232 | 0.00119 | 0.00932 | 0.00637 |    |
| 8041   | focal adhesion assembly                                                          | 0      | 10     | 114     | 795     | 17      | 14 |
| GO:003 |                                                                                  | 34/171 | 266/23 | 0.00119 | 0.00937 | 0.00640 |    |
| 3500   | carbohydrate homeostasis                                                         | 0      | 210    | 928     | 909     | 662     | 34 |
| GO:004 |                                                                                  | 20/171 | 129/23 | 0.00120 | 0.00941 | 0.00643 |    |
| 6488   | phosphatidylinositol metabolic process                                           | 0      | 210    | 607     | 958     | 428     | 20 |
| GO:190 |                                                                                  | 11/171 | 52/232 | 0.00121 | 0.00947 | 0.00647 |    |
| 1570   | fatty acid derivative biosynthetic process                                       | 0      | 10     | 589     | 191     | 003     | 11 |
| GO:000 |                                                                                  | 33/171 | 256/23 | 0.00121 | 0.00947 | 0.00647 |    |
| 6605   | protein targeting                                                                | 0      | 210    | 662     | 191     | 003     | 33 |
| GO:001 |                                                                                  | 17/171 | 102/23 | 0.00121 | 0.00947 | 0.00647 |    |
| 9218   | regulation of steroid metabolic process                                          | 0      | 210    | 763     | 191     | 003     | 17 |
| GO:003 |                                                                                  | 44/171 | 371/23 | 0.00122 | 0.00948 | 0.00648 |    |
| 1667   | response to nutrient levels                                                      | 0      | 210    | 142     | 876     | 154     | 44 |
| GO:003 |                                                                                  | 19/171 | 120/23 | 0.00122 | 0.00950 | 0.00648 |    |
| 1109   | microtubule polymerization or depolymerization                                   | 0      | 210    | 463     | 107     | 995     | 19 |
| GO:000 | regulation of leukocyte chemotaxis                                               | 18/171 | 111/23 | 0.00122 | 0.00950 | 0.00649 | 18 |

|        |                                                              |        |        |         |         |         |    |
|--------|--------------------------------------------------------------|--------|--------|---------|---------|---------|----|
| 2688   |                                                              | 0      | 210    | 963     | 202     | 059     |    |
| GO:001 |                                                              | 18/171 | 111/23 | 0.00122 | 0.00950 | 0.00649 |    |
| 5749   | monosaccharide transmembrane transport                       | 0      | 210    | 963     | 202     | 059     | 18 |
| GO:004 |                                                              | 18/171 | 111/23 | 0.00122 | 0.00950 | 0.00649 |    |
| 3401   | steroid hormone mediated signaling pathway                   | 0      | 210    | 963     | 202     | 059     | 18 |
| GO:000 |                                                              | 29/171 | 216/23 | 0.00124 | 0.00958 | 0.00654 |    |
| 2573   | myeloid leukocyte differentiation                            | 0      | 210    | 614     | 014     | 396     | 29 |
| GO:003 |                                                              | 12/171 | 60/232 | 0.00124 | 0.00958 | 0.00654 |    |
| 0837   | negative regulation of actin filament polymerization         | 0      | 10     | 794     | 014     | 396     | 12 |
| GO:003 |                                                              | 12/171 | 60/232 | 0.00124 | 0.00958 | 0.00654 |    |
| 1102   | neuron projection regeneration                               | 0      | 10     | 794     | 014     | 396     | 12 |
| GO:004 |                                                              | 12/171 | 60/232 | 0.00124 | 0.00958 | 0.00654 |    |
| 2982   | amyloid precursor protein metabolic process                  | 0      | 10     | 794     | 014     | 396     | 12 |
| GO:200 |                                                              | 12/171 | 60/232 | 0.00124 | 0.00958 | 0.00654 |    |
| 0134   | negative regulation of G1/S transition of mitotic cell cycle | 0      | 10     | 794     | 014     | 396     | 12 |
| GO:003 |                                                              | 15/171 | 85/232 | 0.00127 | 0.00979 | 0.00668 |    |
| 4333   | adherens junction assembly                                   | 0      | 10     | 724     | 219     | 881     | 15 |
| GO:005 |                                                              | 45/171 | 383/23 | 0.00130 | 0.01002 | 0.00684 |    |
| 1260   | protein homooligomerization                                  | 0      | 210    | 942     | 574     | 834     | 45 |
| GO:005 |                                                              | 10/171 | 45/232 | 0.00134 | 0.01026 | 0.00701 |    |
| 1646   | mitochondrion localization                                   | 0      | 10     | 935     | 638     | 271     | 10 |
| GO:006 |                                                              | 10/171 | 45/232 | 0.00134 | 0.01026 | 0.00701 |    |
| 0421   | positive regulation of heart growth                          | 0      | 10     | 935     | 638     | 271     | 10 |
| GO:004 |                                                              | 24/171 | 168/23 | 0.00135 | 0.01026 | 0.00701 |    |
| 8659   | smooth muscle cell proliferation                             | 0      | 210    | 226     | 638     | 271     | 24 |
| GO:190 | regulation of protein localization to nucleus                | 19/171 | 121/23 | 0.00135 | 0.01026 | 0.00701 | 19 |

|        |                                                               |        |        |         |         |         |    |
|--------|---------------------------------------------------------------|--------|--------|---------|---------|---------|----|
| 0180   |                                                               | 0      | 210    | 446     | 638     | 271     |    |
| GO:000 |                                                               |        | 18/232 | 0.00135 | 0.01026 | 0.00701 |    |
| 5980   | glycogen catabolic process                                    | 6/1710 | 10     | 826     | 638     | 271     | 6  |
| GO:000 |                                                               |        | 18/232 | 0.00135 | 0.01026 | 0.00701 |    |
| 9251   | glucan catabolic process                                      | 6/1710 | 10     | 826     | 638     | 271     | 6  |
| GO:003 |                                                               |        | 18/232 | 0.00135 | 0.01026 | 0.00701 |    |
| 0809   | negative regulation of nucleotide biosynthetic process        | 6/1710 | 10     | 826     | 638     | 271     | 6  |
| GO:190 |                                                               |        | 18/232 | 0.00135 | 0.01026 | 0.00701 |    |
| 0372   | negative regulation of purine nucleotide biosynthetic process | 6/1710 | 10     | 826     | 638     | 271     | 6  |
| GO:190 |                                                               |        | 18/232 | 0.00135 | 0.01026 | 0.00701 |    |
| 3909   | regulation of receptor clustering                             | 6/1710 | 10     | 826     | 638     | 271     | 6  |
| GO:005 |                                                               | 14/171 | 77/232 | 0.00135 | 0.01026 | 0.00701 |    |
| 5021   | regulation of cardiac muscle tissue growth                    | 0      | 10     | 888     | 638     | 271     | 14 |
| GO:004 |                                                               | 17/171 | 103/23 | 0.00136 | 0.01026 | 0.00701 |    |
| 3255   | regulation of carbohydrate biosynthetic process               | 0      | 210    | 018     | 638     | 271     | 17 |
| GO:001 |                                                               | 18/171 | 112/23 | 0.00136 | 0.01028 | 0.00702 |    |
| 6525   | negative regulation of angiogenesis                           | 0      | 210    | 622     | 54      | 57      | 18 |
| GO:003 |                                                               | 18/171 | 112/23 | 0.00136 | 0.01028 | 0.00702 |    |
| 4219   | carbohydrate transmembrane transport                          | 0      | 210    | 622     | 54      | 57      | 18 |
| GO:006 |                                                               | 13/171 | 69/232 | 0.00142 | 0.01068 | 0.00729 |    |
| 1035   | regulation of cartilage development                           | 0      | 10     | 087     | 307     | 734     | 13 |
| GO:003 |                                                               | 11/171 | 53/232 | 0.00143 | 0.01076 | 0.00735 |    |
| 0850   | prostate gland development                                    | 0      | 10     | 376     | 611     | 407     | 11 |
| GO:001 |                                                               |        | 38/232 | 0.00144 | 0.01078 | 0.00736 |    |
| 0831   | positive regulation of myotube differentiation                | 9/1710 | 10     | 282     | 506     | 701     | 9  |
| GO:001 | astrocyte development                                         | 9/1710 | 38/232 | 0.00144 | 0.01078 | 0.00736 | 9  |

|        |                                                          |        |        |         |         |         |    |
|--------|----------------------------------------------------------|--------|--------|---------|---------|---------|----|
| 4002   |                                                          |        | 10     | 282     | 506     | 701     |    |
| GO:004 |                                                          |        | 38/232 | 0.00144 | 0.01078 | 0.00736 |    |
| 2149   | cellular response to glucose starvation                  | 9/1710 | 10     | 282     | 506     | 701     | 9  |
| GO:001 |                                                          | 15/171 | 86/232 | 0.00144 | 0.01078 | 0.00736 |    |
| 0827   | regulation of glucose transmembrane transport            | 0      | 10     | 367     | 506     | 701     | 15 |
| GO:005 |                                                          | 12/171 | 61/232 | 0.00145 | 0.01080 | 0.00737 |    |
| 1591   | response to cAMP                                         | 0      | 10     | 112     | 271     | 906     | 12 |
| GO:001 |                                                          |        | 31/232 | 0.00145 | 0.01080 | 0.00737 |    |
| 9884   | antigen processing and presentation of exogenous antigen | 8/1710 | 10     | 343     | 271     | 906     | 8  |
| GO:004 |                                                          |        | 31/232 | 0.00145 | 0.01080 | 0.00737 |    |
| 5662   | negative regulation of myoblast differentiation          | 8/1710 | 10     | 343     | 271     | 906     | 8  |
| GO:007 |                                                          |        | 31/232 | 0.00145 | 0.01080 | 0.00737 |    |
| 0670   | response to interleukin-4                                | 8/1710 | 10     | 343     | 271     | 906     | 8  |
| GO:001 |                                                          | 33/171 | 259/23 | 0.00148 | 0.01098 | 0.00750 |    |
| 6050   | vesicle organization                                     | 0      | 210    | 009     | 691     | 489     | 33 |
| GO:001 |                                                          | 22/171 | 150/23 | 0.00148 | 0.01103 | 0.00753 |    |
| 4013   | regulation of gliogenesis                                | 0      | 210    | 98      | 092     | 495     | 22 |
| GO:002 |                                                          | 22/171 | 150/23 | 0.00148 | 0.01103 | 0.00753 |    |
| 2612   | gland morphogenesis                                      | 0      | 210    | 98      | 092     | 495     | 22 |
| GO:003 |                                                          | 17/171 | 104/23 | 0.00151 | 0.01120 | 0.00765 |    |
| 0518   | intracellular steroid hormone receptor signaling pathway | 0      | 210    | 658     | 083     | 101     | 17 |
| GO:003 |                                                          | 17/171 | 104/23 | 0.00151 | 0.01120 | 0.00765 |    |
| 2612   | interleukin-1 production                                 | 0      | 210    | 658     | 083     | 101     | 17 |
| GO:190 |                                                          | 31/171 | 239/23 | 0.00152 | 0.01122 | 0.00766 |    |
| 3362   | regulation of cellular protein catabolic process         | 0      | 210    | 206     | 714     | 898     | 31 |
| GO:003 | cellular carbohydrate biosynthetic process               | 14/171 | 78/232 | 0.00154 | 0.01135 | 0.00775 | 14 |

|        |                                                     |        |        |         |         |         |    |
|--------|-----------------------------------------------------|--------|--------|---------|---------|---------|----|
| 4637   |                                                     | 0      | 10     | 59      | 994     | 97      |    |
| GO:190 |                                                     | 14/171 | 78/232 | 0.00154 | 0.01135 | 0.00775 |    |
| 0046   | regulation of hemostasis                            | 0      | 10     | 59      | 994     | 97      | 14 |
| GO:190 |                                                     | 14/171 | 78/232 | 0.00154 | 0.01135 | 0.00775 |    |
| 1862   | negative regulation of muscle tissue development    | 0      | 10     | 59      | 994     | 97      | 14 |
| GO:190 |                                                     | 23/171 | 160/23 | 0.00154 | 0.01136 | 0.00776 |    |
| 3169   | regulation of calcium ion transmembrane transport   | 0      | 210    | 817     | 235     | 134     | 23 |
| GO:004 |                                                     | 36/171 | 291/23 | 0.00157 | 0.01151 | 0.00786 |    |
| 8511   | rhythmic process                                    | 0      | 210    | 145     | 872     | 815     | 36 |
| GO:000 |                                                     | 10/171 | 46/232 | 0.00161 | 0.01178 | 0.00805 |    |
| 7628   | adult walking behavior                              | 0      | 10     | 202     | 647     | 105     | 10 |
| GO:003 |                                                     | 10/171 | 46/232 | 0.00161 | 0.01178 | 0.00805 |    |
| 3013   | tetrapyrrole metabolic process                      | 0      | 10     | 202     | 647     | 105     | 10 |
| GO:000 |                                                     | 22/171 | 151/23 | 0.00162 | 0.01186 | 0.00810 |    |
| 6606   | protein import into nucleus                         | 0      | 210    | 522     | 814     | 684     | 22 |
| GO:007 |                                                     | 55/171 | 497/23 | 0.00166 | 0.01212 | 0.00828 |    |
| 2503   | cellular divalent inorganic cation homeostasis      | 0      | 210    | 228     | 363     | 135     | 55 |
| GO:006 |                                                     | 18/171 | 114/23 | 0.00167 | 0.01221 | 0.00834 |    |
| 0419   | heart growth                                        | 0      | 210    | 825     | 453     | 344     | 18 |
| GO:001 |                                                     | 12/171 | 62/232 | 0.00168 | 0.01221 | 0.00834 |    |
| 4911   | positive regulation of smooth muscle cell migration | 0      | 10     | 081     | 453     | 344     | 12 |
| GO:004 |                                                     |        | 13/232 | 0.00168 | 0.01221 | 0.00834 |    |
| 6471   | phosphatidylglycerol metabolic process              | 5/1710 | 10     | 187     | 453     | 344     | 5  |
| GO:007 |                                                     | 23/171 | 161/23 | 0.00168 | 0.01221 | 0.00834 |    |
| 2175   | epithelial tube formation                           | 0      | 210    | 31      | 453     | 344     | 23 |
| GO:004 | regulation of potassium ion transport               | 17/171 | 105/23 | 0.00168 | 0.01223 | 0.00835 | 17 |



|        |                                                                                  |        |        |         |         |         |    |
|--------|----------------------------------------------------------------------------------|--------|--------|---------|---------|---------|----|
| 3266   |                                                                                  | 0      | 210    | 787     | 393     | 67      |    |
| GO:005 |                                                                                  | 21/171 | 142/23 | 0.00169 | 0.01228 | 0.00839 |    |
| 0680   | negative regulation of epithelial cell proliferation                             | 0      | 210    | 746     | 818     | 375     | 21 |
| GO:004 |                                                                                  |        | 25/232 | 0.00171 | 0.01238 | 0.00846 |    |
| 3171   | peptide catabolic process                                                        | 7/1710 | 10     | 558     | 866     | 239     | 7  |
| GO:190 |                                                                                  |        | 25/232 | 0.00171 | 0.01238 | 0.00846 |    |
| 3747   | regulation of establishment of protein localization to mitochondrion             | 7/1710 | 10     | 558     | 866     | 239     | 7  |
| GO:003 |                                                                                  | 14/171 | 79/232 | 0.00175 | 0.01264 | 0.00863 |    |
| 3143   | regulation of intracellular steroid hormone receptor signaling pathway           | 0      | 10     | 387     | 021     | 422     | 14 |
| GO:003 |                                                                                  |        | 39/232 | 0.00175 | 0.01264 | 0.00863 |    |
| 0521   | androgen receptor signaling pathway                                              | 9/1710 | 10     | 474     | 021     | 422     | 9  |
| GO:006 |                                                                                  | 30/171 | 231/23 | 0.00176 | 0.01266 | 0.00865 |    |
| 0348   | bone development                                                                 | 0      | 210    | 044     | 566     | 16      | 30 |
| GO:002 |                                                                                  | 26/171 | 191/23 | 0.00177 | 0.01276 | 0.00871 |    |
| 1915   | neural tube development                                                          | 0      | 210    | 626     | 376     | 861     | 26 |
| GO:004 |                                                                                  | 27/171 | 201/23 | 0.00178 | 0.01280 | 0.00875 |    |
| 3281   | regulation of cysteine-type endopeptidase activity involved in apoptotic process | 0      | 210    | 487     | 981     | 007     | 27 |
| GO:000 |                                                                                  |        | 32/232 | 0.00181 | 0.01297 | 0.00886 |    |
| 6220   | pyrimidine nucleotide metabolic process                                          | 8/1710 | 10     | 431     | 328     | 173     | 8  |
| GO:000 |                                                                                  |        | 32/232 | 0.00181 | 0.01297 | 0.00886 |    |
| 9262   | deoxyribonucleotide metabolic process                                            | 8/1710 | 10     | 431     | 328     | 173     | 8  |
| GO:005 |                                                                                  |        | 32/232 | 0.00181 | 0.01297 | 0.00886 |    |
| 1642   | centrosome localization                                                          | 8/1710 | 10     | 431     | 328     | 173     | 8  |
| GO:000 |                                                                                  | 23/171 | 162/23 | 0.00182 | 0.01303 | 0.00890 |    |
| 7033   | vacuole organization                                                             | 0      | 210    | 795     | 894     | 658     | 23 |
| GO:003 | interleukin-6 production                                                         | 23/171 | 162/23 | 0.00182 | 0.01303 | 0.00890 | 23 |

|        |                                                                         |        |        |         |         |         |    |
|--------|-------------------------------------------------------------------------|--------|--------|---------|---------|---------|----|
| 2635   |                                                                         | 0      | 210    | 795     | 894     | 658     |    |
| GO:190 |                                                                         | 15/171 | 88/232 | 0.00183 | 0.01304 | 0.00891 |    |
| 3035   | negative regulation of response to wounding                             | 0      | 10     | 134     | 715     | 219     | 15 |
| GO:005 |                                                                         | 18/171 | 115/23 | 0.00185 | 0.01314 | 0.00897 |    |
| 1209   | release of sequestered calcium ion into cytosol                         | 0      | 210    | 555     | 017     | 573     | 18 |
| GO:007 |                                                                         | 18/171 | 115/23 | 0.00185 | 0.01314 | 0.00897 |    |
| 1346   | cellular response to interferon-gamma                                   | 0      | 210    | 555     | 017     | 573     | 18 |
| GO:000 |                                                                         |        | 19/232 | 0.00186 | 0.01314 | 0.00897 |    |
| 2495   | antigen processing and presentation of peptide antigen via MHC class II | 6/1710 | 10     | 239     | 017     | 573     | 6  |
| GO:003 |                                                                         |        | 19/232 | 0.00186 | 0.01314 | 0.00897 |    |
| 2011   | ARF protein signal transduction                                         | 6/1710 | 10     | 239     | 017     | 573     | 6  |
| GO:003 |                                                                         |        | 19/232 | 0.00186 | 0.01314 | 0.00897 |    |
| 2012   | regulation of ARF protein signal transduction                           | 6/1710 | 10     | 239     | 017     | 573     | 6  |
| GO:004 |                                                                         |        | 19/232 | 0.00186 | 0.01314 | 0.00897 |    |
| 4766   | multi-organism transport                                                | 6/1710 | 10     | 239     | 017     | 573     | 6  |
| GO:190 |                                                                         |        | 19/232 | 0.00186 | 0.01314 | 0.00897 |    |
| 2259   | regulation of delayed rectifier potassium channel activity              | 6/1710 | 10     | 239     | 017     | 573     | 6  |
| GO:190 |                                                                         |        | 19/232 | 0.00186 | 0.01314 | 0.00897 |    |
| 2579   | multi-organism localization                                             | 6/1710 | 10     | 239     | 017     | 573     | 6  |
| GO:200 |                                                                         | 16/171 | 97/232 | 0.00186 | 0.01317 | 0.00899 |    |
| 1243   | negative regulation of intrinsic apoptotic signaling pathway            | 0      | 10     | 93      | 306     | 82      | 16 |
| GO:004 |                                                                         | 17/171 | 106/23 | 0.00187 | 0.01318 | 0.00900 |    |
| 5446   | endothelial cell differentiation                                        | 0      | 210    | 515     | 247     | 462     | 17 |
| GO:004 |                                                                         | 17/171 | 106/23 | 0.00187 | 0.01318 | 0.00900 |    |
| 8661   | positive regulation of smooth muscle cell proliferation                 | 0      | 210    | 515     | 247     | 462     | 17 |
| GO:190 | regulation of glycoprotein metabolic process                            | 10/171 | 47/232 | 0.00191 | 0.01344 | 0.00918 | 10 |

|        |                                                              |        |        |         |         |         |    |
|--------|--------------------------------------------------------------|--------|--------|---------|---------|---------|----|
| 3018   |                                                              | 0      | 10     | 46      | 365     | 302     |    |
| GO:006 |                                                              | 12/171 | 63/232 | 0.00193 | 0.01360 | 0.00929 |    |
| 0999   | positive regulation of dendritic spine development           | 0      | 10     | 956     | 25      | 154     | 12 |
| GO:000 |                                                              | 11/171 | 55/232 | 0.00196 | 0.01373 | 0.00938 |    |
| 1523   | retinoid metabolic process                                   | 0      | 10     | 558     | 557     | 243     | 11 |
| GO:000 |                                                              | 11/171 | 55/232 | 0.00196 | 0.01373 | 0.00938 |    |
| 2548   | monocyte chemotaxis                                          | 0      | 10     | 558     | 557     | 243     | 11 |
| GO:004 |                                                              | 11/171 | 55/232 | 0.00196 | 0.01373 | 0.00938 |    |
| 6676   | negative regulation of insulin secretion                     | 0      | 10     | 558     | 557     | 243     | 11 |
| GO:005 |                                                              | 46/171 | 402/23 | 0.00198 | 0.01388 | 0.00948 |    |
| 1346   | negative regulation of hydrolase activity                    | 0      | 210    | 903     | 284     | 303     | 46 |
| GO:000 |                                                              | 19/171 | 125/23 | 0.00199 | 0.01392 | 0.00951 |    |
| 2761   | regulation of myeloid leukocyte differentiation              | 0      | 210    | 715     | 287     | 037     | 19 |
| GO:003 |                                                              | 30/171 | 233/23 | 0.00201 | 0.01401 | 0.00957 |    |
| 0278   | regulation of ossification                                   | 0      | 210    | 253     | 334     | 217     | 30 |
| GO:000 |                                                              | 21/171 | 144/23 | 0.00202 | 0.01407 | 0.00961 |    |
| 2687   | positive regulation of leukocyte migration                   | 0      | 210    | 39      | 572     | 478     | 21 |
| GO:200 |                                                              | 18/171 | 116/23 | 0.00204 | 0.01422 | 0.00971 |    |
| 0181   | negative regulation of blood vessel morphogenesis            | 0      | 210    | 837     | 902     | 949     | 18 |
| GO:001 |                                                              | 15/171 | 89/232 | 0.00205 | 0.01426 | 0.00974 |    |
| 4015   | positive regulation of gliogenesis                           | 0      | 10     | 554     | 185     | 192     | 15 |
| GO:004 |                                                              | 17/171 | 107/23 | 0.00207 | 0.01441 | 0.00984 |    |
| 3487   | regulation of RNA stability                                  | 0      | 210    | 956     | 084     | 369     | 17 |
| GO:004 |                                                              | 16/171 | 98/232 | 0.00208 | 0.01441 | 0.00984 |    |
| 3488   | regulation of mRNA stability                                 | 0      | 10     | 442     | 084     | 369     | 16 |
| GO:200 | negative regulation of extrinsic apoptotic signaling pathway | 16/171 | 98/232 | 0.00208 | 0.01441 | 0.00984 | 16 |

|        |                                                    |        |        |         |         |         |    |
|--------|----------------------------------------------------|--------|--------|---------|---------|---------|----|
| 1237   |                                                    | 0      | 10     | 442     | 084     | 369     |    |
| GO:002 |                                                    | 38/171 | 317/23 | 0.00209 | 0.01445 | 0.00987 |    |
| 1700   | developmental maturation                           | 0      | 210    | 457     | 785     | 58      | 38 |
| GO:000 |                                                    | 22/171 | 154/23 | 0.00209 | 0.01445 | 0.00987 |    |
| 6937   | regulation of muscle contraction                   | 0      | 210    | 617     | 785     | 58      | 22 |
| GO:007 |                                                    | 20/171 | 135/23 | 0.00211 | 0.01449 | 0.00989 |    |
| 2331   | signal transduction by p53 class mediator          | 0      | 210    | 35      | 116     | 856     | 20 |
| GO:190 |                                                    | 31/171 | 244/23 | 0.00211 | 0.01449 | 0.00989 |    |
| 1215   | negative regulation of neuron death                | 0      | 210    | 462     | 116     | 856     | 31 |
| GO:000 |                                                    |        | 40/232 | 0.00211 | 0.01449 | 0.00989 |    |
| 6692   | prostanoid metabolic process                       | 9/1710 | 10     | 836     | 116     | 856     | 9  |
| GO:000 |                                                    |        | 40/232 | 0.00211 | 0.01449 | 0.00989 |    |
| 6693   | prostaglandin metabolic process                    | 9/1710 | 10     | 836     | 116     | 856     | 9  |
| GO:003 |                                                    |        | 40/232 | 0.00211 | 0.01449 | 0.00989 |    |
| 0225   | macrophage differentiation                         | 9/1710 | 10     | 836     | 116     | 856     | 9  |
| GO:003 |                                                    |        | 40/232 | 0.00211 | 0.01449 | 0.00989 |    |
| 8179   | neurotrophin signaling pathway                     | 9/1710 | 10     | 836     | 116     | 856     | 9  |
| GO:007 |                                                    |        | 40/232 | 0.00211 | 0.01449 | 0.00989 |    |
| 0207   | protein homotrimerization                          | 9/1710 | 10     | 836     | 116     | 856     | 9  |
| GO:000 |                                                    | 30/171 | 234/23 | 0.00214 | 0.01468 | 0.01003 |    |
| 6813   | potassium ion transport                            | 0      | 210    | 981     | 908     | 375     | 30 |
| GO:009 |                                                    |        | 26/232 | 0.00220 | 0.01499 | 0.01024 |    |
| 8901   | regulation of cardiac muscle cell action potential | 7/1710 | 10     | 004     | 724     | 424     | 7  |
| GO:200 |                                                    |        | 26/232 | 0.00220 | 0.01499 | 0.01024 |    |
| 0050   | regulation of non-canonical Wnt signaling pathway  | 7/1710 | 10     | 004     | 724     | 424     | 7  |
| GO:004 | branching morphogenesis of an epithelial tube      | 25/171 | 184/23 | 0.00220 | 0.01503 | 0.01027 | 25 |

|        |                                                                                   |        |        |         |         |         |    |
|--------|-----------------------------------------------------------------------------------|--------|--------|---------|---------|---------|----|
| 8754   |                                                                                   | 0      | 210    | 815     | 5       | 004     |    |
| GO:000 |                                                                                   | 27/171 | 204/23 | 0.00221 | 0.01505 | 0.01028 |    |
| 1666   | response to hypoxia                                                               | 0      | 210    | 358     | 439     | 328     | 27 |
| GO:000 |                                                                                   | 12/171 | 64/232 | 0.00223 | 0.01509 | 0.01031 |    |
| 2763   | positive regulation of myeloid leukocyte differentiation                          | 0      | 10     | 004     | 608     | 176     | 12 |
| GO:003 | negative regulation of transforming growth factor beta receptor signaling pathway | 12/171 | 64/232 | 0.00223 | 0.01509 | 0.01031 |    |
| 0512   |                                                                                   | 0      | 10     | 004     | 608     | 176     | 12 |
| GO:003 |                                                                                   | 12/171 | 64/232 | 0.00223 | 0.01509 | 0.01031 |    |
| 4605   | cellular response to heat                                                         | 0      | 10     | 004     | 608     | 176     | 12 |
| GO:190 |                                                                                   | 12/171 | 64/232 | 0.00223 | 0.01509 | 0.01031 |    |
| 2807   | negative regulation of cell cycle G1/S phase transition                           | 0      | 10     | 004     | 608     | 176     | 12 |
| GO:007 |                                                                                   | 14/171 | 81/232 | 0.00223 | 0.01512 | 0.01033 |    |
| 2384   | organelle transport along microtubule                                             | 0      | 10     | 979     | 652     | 255     | 14 |
| GO:001 |                                                                                   |        | 33/232 | 0.00224 | 0.01512 | 0.01033 |    |
| 0543   | regulation of platelet activation                                                 | 8/1710 | 10     | 231     | 652     | 255     | 8  |
| GO:001 |                                                                                   |        | 33/232 | 0.00224 | 0.01512 | 0.01033 |    |
| 0667   | negative regulation of cardiac muscle cell apoptotic process                      | 8/1710 | 10     | 231     | 652     | 255     | 8  |
| GO:005 |                                                                                   | 18/171 | 117/23 | 0.00225 | 0.01520 | 0.01038 |    |
| 1283   | negative regulation of sequestering of calcium ion                                | 0      | 210    | 775     | 258     | 451     | 18 |
| GO:003 |                                                                                   | 10/171 | 48/232 | 0.00226 | 0.01520 | 0.01038 |    |
| 1648   | protein destabilization                                                           | 0      | 10     | 139     | 258     | 451     | 10 |
| GO:200 |                                                                                   | 10/171 | 48/232 | 0.00226 | 0.01520 | 0.01038 |    |
| 0725   | regulation of cardiac muscle cell differentiation                                 | 0      | 10     | 139     | 258     | 451     | 10 |
| GO:004 |                                                                                   | 11/171 | 56/232 | 0.00228 | 0.01535 | 0.01048 |    |
| 3536   | positive regulation of blood vessel endothelial cell migration                    | 0      | 10     | 607     | 085     | 579     | 11 |
| GO:004 | regulation of multicellular organism growth                                       | 15/171 | 90/232 | 0.00230 | 0.01542 | 0.01053 | 15 |

|        |                                                                                |        |        |         |         |         |    |
|--------|--------------------------------------------------------------------------------|--------|--------|---------|---------|---------|----|
| 0014   |                                                                                | 0      | 10     | 21      | 434     | 599     |    |
| GO:003 |                                                                                | 17/171 | 108/23 | 0.00230 | 0.01542 | 0.01053 |    |
| 0316   | osteoclast differentiation                                                     | 0      | 210    | 23      | 434     | 599     | 17 |
| GO:003 |                                                                                | 16/171 | 99/232 | 0.00231 | 0.01550 | 0.01059 |    |
| 2755   | positive regulation of interleukin-6 production                                | 0      | 10     | 979     | 596     | 174     | 16 |
| GO:006 |                                                                                | 16/171 | 99/232 | 0.00231 | 0.01550 | 0.01059 |    |
| 2014   | negative regulation of small molecule metabolic process                        | 0      | 10     | 979     | 596     | 174     | 16 |
| GO:000 |                                                                                | 28/171 | 215/23 | 0.00235 | 0.01573 | 0.01074 |    |
| 2274   | myeloid leukocyte activation                                                   | 0      | 210    | 652     | 345     | 713     | 28 |
| GO:004 |                                                                                | 24/171 | 175/23 | 0.00236 | 0.01574 | 0.01075 |    |
| 5807   | positive regulation of endocytosis                                             | 0      | 210    | 118     | 656     | 609     | 24 |
| GO:009 |                                                                                | 31/171 | 246/23 | 0.00240 | 0.01600 | 0.01092 |    |
| 7485   | neuron projection guidance                                                     | 0      | 210    | 201     | 06      | 962     | 31 |
| GO:000 |                                                                                | 13/171 | 73/232 | 0.00241 | 0.01602 | 0.01094 |    |
| 6626   | protein targeting to mitochondrion                                             | 0      | 10     | 154     | 752     | 801     | 13 |
| GO:005 |                                                                                | 13/171 | 73/232 | 0.00241 | 0.01602 | 0.01094 |    |
| 1145   | smooth muscle cell differentiation                                             | 0      | 10     | 154     | 752     | 801     | 13 |
| GO:000 |                                                                                |        | 14/232 | 0.00245 | 0.01628 | 0.01112 |    |
| 9263   | deoxyribonucleotide biosynthetic process                                       | 5/1710 | 10     | 85      | 405     | 323     | 5  |
| GO:001 | antigen processing and presentation of exogenous peptide antigen via MHC class |        | 14/232 | 0.00245 | 0.01628 | 0.01112 |    |
| 9886   | II                                                                             | 5/1710 | 10     | 85      | 405     | 323     | 5  |
| GO:200 |                                                                                |        | 14/232 | 0.00245 | 0.01628 | 0.01112 |    |
| 1044   | regulation of integrin-mediated signaling pathway                              | 5/1710 | 10     | 85      | 405     | 323     | 5  |
| GO:200 |                                                                                | 29/171 | 226/23 | 0.00248 | 0.01634 | 0.01116 |    |
| 0116   | regulation of cysteine-type endopeptidase activity                             | 0      | 210    | 9       | 9       | 76      | 29 |
| GO:000 | antigen processing and presentation of peptide or polysaccharide antigen via   | 6/1710 | 20/232 | 0.00249 | 0.01634 | 0.01116 | 6  |

|        |                                                                        |        |        |         |         |         |    |
|--------|------------------------------------------------------------------------|--------|--------|---------|---------|---------|----|
| 2504   | MHC class II                                                           |        | 10     | 629     | 9       | 76      |    |
| GO:000 |                                                                        |        | 20/232 | 0.00249 | 0.01634 | 0.01116 |    |
| 8090   | retrograde axonal transport                                            | 6/1710 | 10     | 629     | 9       | 76      | 6  |
| GO:000 |                                                                        |        | 20/232 | 0.00249 | 0.01634 | 0.01116 |    |
| 9200   | deoxyribonucleoside triphosphate metabolic process                     | 6/1710 | 10     | 629     | 9       | 76      | 6  |
| GO:001 |                                                                        |        | 20/232 | 0.00249 | 0.01634 | 0.01116 |    |
| 6226   | iron-sulfur cluster assembly                                           | 6/1710 | 10     | 629     | 9       | 76      | 6  |
| GO:003 |                                                                        |        | 20/232 | 0.00249 | 0.01634 | 0.01116 |    |
| 1163   | metallo-sulfur cluster assembly                                        | 6/1710 | 10     | 629     | 9       | 76      | 6  |
| GO:003 |                                                                        |        | 20/232 | 0.00249 | 0.01634 | 0.01116 |    |
| 2288   | myelin assembly                                                        | 6/1710 | 10     | 629     | 9       | 76      | 6  |
| GO:004 |                                                                        |        | 20/232 | 0.00249 | 0.01634 | 0.01116 |    |
| 4247   | cellular polysaccharide catabolic process                              | 6/1710 | 10     | 629     | 9       | 76      | 6  |
| GO:006 |                                                                        |        | 20/232 | 0.00249 | 0.01634 | 0.01116 |    |
| 1323   | cell proliferation involved in heart morphogenesis                     | 6/1710 | 10     | 629     | 9       | 76      | 6  |
| GO:200 |                                                                        |        | 20/232 | 0.00249 | 0.01634 | 0.01116 |    |
| 0136   | regulation of cell proliferation involved in heart morphogenesis       | 6/1710 | 10     | 629     | 9       | 76      | 6  |
| GO:004 |                                                                        | 23/171 | 166/23 | 0.00251 | 0.01647 | 0.01125 |    |
| 5931   | positive regulation of mitotic cell cycle                              | 0      | 210    | 838     | 524     | 383     | 23 |
| GO:003 |                                                                        |        | 41/232 | 0.00253 | 0.01653 | 0.01129 |    |
| 8083   | peptidyl-tyrosine autophosphorylation                                  | 9/1710 | 10     | 951     | 937     | 764     | 9  |
| GO:005 |                                                                        |        | 41/232 | 0.00253 | 0.01653 | 0.01129 |    |
| 1281   | positive regulation of release of sequestered calcium ion into cytosol | 9/1710 | 10     | 951     | 937     | 764     | 9  |
| GO:008 |                                                                        |        | 41/232 | 0.00253 | 0.01653 | 0.01129 |    |
| 6009   | membrane repolarization                                                | 9/1710 | 10     | 951     | 937     | 764     | 9  |
| GO:190 | positive regulation of sprouting angiogenesis                          | 9/1710 | 41/232 | 0.00253 | 0.01653 | 0.01129 | 9  |

|        |                                                                 |        |        |         |         |         |
|--------|-----------------------------------------------------------------|--------|--------|---------|---------|---------|
| 3672   |                                                                 | 10     | 951    | 937     | 764     |         |
| GO:006 |                                                                 | 12/171 | 65/232 | 0.00255 | 0.01662 | 0.01135 |
| 0425   | lung morphogenesis                                              | 0      | 10     | 509     | 23      | 428     |
| GO:003 |                                                                 | 15/171 | 91/232 | 0.00257 | 0.01671 | 0.01141 |
| 2652   | regulation of interleukin-1 production                          | 0      | 10     | 266     | 801     | 966     |
| GO:003 |                                                                 | 33/171 | 268/23 | 0.00258 | 0.01680 | 0.01147 |
| 4599   | cellular response to oxidative stress                           | 0      | 210    | 841     | 167     | 681     |
| GO:000 |                                                                 | 53/171 | 485/23 | 0.00260 | 0.01691 | 0.01155 |
| 7264   | small GTPase mediated signal transduction                       | 0      | 210    | 897     | 629     | 51      |
| GO:005 |                                                                 | 19/171 | 128/23 | 0.00263 | 0.01703 | 0.01163 |
| 1092   | positive regulation of NF-kappaB transcription factor activity  | 0      | 210    | 326     | 598     | 686     |
| GO:190 |                                                                 | 19/171 | 128/23 | 0.00263 | 0.01703 | 0.01163 |
| 1343   | negative regulation of vasculature development                  | 0      | 210    | 326     | 598     | 686     |
| GO:007 |                                                                 | 34/171 | 279/23 | 0.00266 | 0.01724 | 0.01177 |
| 1902   | positive regulation of protein serine/threonine kinase activity | 0      | 210    | 822     | 31      | 834     |
| GO:004 |                                                                 | 37/171 | 311/23 | 0.00270 | 0.01746 | 0.01193 |
| 4282   | small molecule catabolic process                                | 0      | 210    | 567     | 579     | 045     |
| GO:003 |                                                                 | 31/171 | 248/23 | 0.00272 | 0.01753 | 0.01198 |
| 2147   | activation of protein kinase activity                           | 0      | 210    | 225     | 963     | 089     |
| GO:000 |                                                                 | 18/171 | 119/23 | 0.00273 | 0.01753 | 0.01198 |
| 3158   | endothelium development                                         | 0      | 210    | 058     | 963     | 089     |
| GO:005 |                                                                 | 18/171 | 119/23 | 0.00273 | 0.01753 | 0.01198 |
| 1282   | regulation of sequestering of calcium ion                       | 0      | 210    | 058     | 963     | 089     |
| GO:003 |                                                                 | 13/171 | 74/232 | 0.00273 | 0.01753 | 0.01198 |
| 2651   | regulation of interleukin-1 beta production                     | 0      | 10     | 212     | 963     | 089     |
| GO:200 | positive regulation of DNA biosynthetic process                 | 13/171 | 74/232 | 0.00273 | 0.01753 | 0.01198 |



|        |                                                                             |        |        |         |         |         |         |
|--------|-----------------------------------------------------------------------------|--------|--------|---------|---------|---------|---------|
| 0573   |                                                                             | 0      | 10     | 212     | 963     | 089     |         |
| GO:000 |                                                                             |        | 34/232 | 0.00274 | 0.01754 | 0.01198 |         |
| 0002   | mitochondrial genome maintenance                                            | 8/1710 | 10     | 565     | 933     | 752     | 8       |
| GO:004 |                                                                             |        | 34/232 | 0.00274 | 0.01754 | 0.01198 |         |
| 4275   | cellular carbohydrate catabolic process                                     | 8/1710 | 10     | 565     | 933     | 752     | 8       |
| GO:004 |                                                                             |        | 34/232 | 0.00274 | 0.01754 | 0.01198 |         |
| 8679   | regulation of axon regeneration                                             | 8/1710 | 10     | 565     | 933     | 752     | 8       |
| GO:009 |                                                                             |        | 34/232 | 0.00274 | 0.01754 | 0.01198 |         |
| 0322   | regulation of superoxide metabolic process                                  | 8/1710 | 10     | 565     | 933     | 752     | 8       |
| GO:003 |                                                                             |        | 27/232 | 0.00278 | 0.01777 | 0.01213 |         |
| 2801   | receptor catabolic process                                                  | 7/1710 | 10     | 357     | 228     | 981     | 7       |
| GO:190 |                                                                             |        | 14/171 | 83/232  | 0.00283 | 0.01806 | 0.01233 |
| 1888   | regulation of cell junction assembly                                        | 0      | 10     | 18      | 046     | 665     | 14      |
| GO:000 |                                                                             |        | 15/171 | 92/232  | 0.00286 | 0.01825 | 0.01247 |
| 6476   | protein deacetylation                                                       | 0      | 10     | 898     | 77      | 138     | 15      |
| GO:006 |                                                                             |        | 15/171 | 92/232  | 0.00286 | 0.01825 | 0.01247 |
| 0998   | regulation of dendritic spine development                                   | 0      | 10     | 898     | 77      | 138     | 15      |
| GO:004 |                                                                             |        | 19/171 | 129/23  | 0.00287 | 0.01828 | 0.01249 |
| 2177   | negative regulation of protein catabolic process                            | 0      | 210    | 977     | 655     | 109     | 19      |
| GO:004 |                                                                             |        | 19/171 | 129/23  | 0.00287 | 0.01828 | 0.01249 |
| 5995   | regulation of embryonic development                                         | 0      | 210    | 977     | 655     | 109     | 19      |
| GO:003 |                                                                             |        | 31/171 | 249/23  | 0.00289 | 0.01836 | 0.01254 |
| 1503   | protein-containing complex localization                                     | 0      | 210    | 56      | 711     | 612     | 31      |
| GO:003 |                                                                             |        | 12/171 | 66/232  | 0.00291 | 0.01846 | 0.01261 |
| 2922   | circadian regulation of gene expression                                     | 0      | 10     | 764     | 68      | 422     | 12      |
| GO:190 | negative regulation of cellular response to transforming growth factor beta | 12/171 | 66/232 | 0.00291 | 0.01846 | 0.01261 | 12      |

|        |                                                                 |        |        |         |         |         |    |
|--------|-----------------------------------------------------------------|--------|--------|---------|---------|---------|----|
| 3845   | stimulus                                                        | 0      | 10     | 764     | 68      | 422     |    |
| GO:005 |                                                                 | 18/171 | 120/23 | 0.00299 | 0.01894 | 0.01294 |    |
| 1208   | sequestering of calcium ion                                     | 0      | 210    | 633     | 434     | 041     | 18 |
| GO:000 |                                                                 |        | 42/232 | 0.00302 | 0.01905 | 0.01301 |    |
| 0959   | mitochondrial RNA metabolic process                             | 9/1710 | 10     | 434     | 956     | 912     | 9  |
| GO:003 |                                                                 |        | 42/232 | 0.00302 | 0.01905 | 0.01301 |    |
| 0866   | cortical actin cytoskeleton organization                        | 9/1710 | 10     | 434     | 956     | 912     | 9  |
| GO:005 |                                                                 |        | 42/232 | 0.00302 | 0.01905 | 0.01301 |    |
| 5023   | positive regulation of cardiac muscle tissue growth             | 9/1710 | 10     | 434     | 956     | 912     | 9  |
| GO:000 |                                                                 | 45/171 | 400/23 | 0.00306 | 0.01926 | 0.01315 |    |
| 6979   | response to oxidative stress                                    | 0      | 210    | 032     | 551     | 98      | 45 |
| GO:004 |                                                                 | 13/171 | 75/232 | 0.00308 | 0.01940 | 0.01325 |    |
| 5843   | negative regulation of striated muscle tissue development       | 0      | 10     | 669     | 538     | 533     | 13 |
| GO:000 |                                                                 | 17/171 | 111/23 | 0.00309 | 0.01940 | 0.01325 |    |
| 8637   | apoptotic mitochondrial changes                                 | 0      | 210    | 321     | 538     | 533     | 17 |
| GO:007 |                                                                 | 17/171 | 111/23 | 0.00309 | 0.01940 | 0.01325 |    |
| 1901   | negative regulation of protein serine/threonine kinase activity | 0      | 210    | 321     | 538     | 533     | 17 |
| GO:003 |                                                                 | 10/171 | 50/232 | 0.00310 | 0.01940 | 0.01325 |    |
| 0865   | cortical cytoskeleton organization                              | 0      | 10     | 579     | 538     | 533     | 10 |
| GO:003 |                                                                 | 10/171 | 50/232 | 0.00310 | 0.01940 | 0.01325 |    |
| 2330   | regulation of chondrocyte differentiation                       | 0      | 10     | 579     | 538     | 533     | 10 |
| GO:005 |                                                                 | 10/171 | 50/232 | 0.00310 | 0.01940 | 0.01325 |    |
| 1055   | negative regulation of lipid biosynthetic process               | 0      | 10     | 579     | 538     | 533     | 10 |
| GO:007 |                                                                 | 10/171 | 50/232 | 0.00310 | 0.01940 | 0.01325 |    |
| 1675   | regulation of mononuclear cell migration                        | 0      | 10     | 579     | 538     | 533     | 10 |
| GO:000 | cellular glucose homeostasis                                    | 22/171 | 159/23 | 0.00313 | 0.01958 | 0.01337 | 22 |

|        |                                                                  |        |        |         |         |         |    |
|--------|------------------------------------------------------------------|--------|--------|---------|---------|---------|----|
| 1678   |                                                                  | 0      | 210    | 733     | 15      | 564     |    |
| GO:003 |                                                                  | 24/171 | 179/23 | 0.00318 | 0.01984 | 0.01355 |    |
| 4612   | response to tumor necrosis factor                                | 0      | 210    | 352     | 859     | 808     | 24 |
| GO:007 |                                                                  | 20/171 | 140/23 | 0.00325 | 0.02029 | 0.01386 |    |
| 1333   | cellular response to glucose stimulus                            | 0      | 210    | 813     | 212     | 105     | 20 |
| GO:001 |                                                                  |        | 21/232 | 0.00327 | 0.02038 | 0.01392 |    |
| 0560   | positive regulation of glycoprotein biosynthetic process         | 6/1710 | 10     | 938     | 102     | 177     | 6  |
| GO:190 |                                                                  |        | 21/232 | 0.00327 | 0.02038 | 0.01392 |    |
| 1626   | regulation of postsynaptic membrane organization                 | 6/1710 | 10     | 938     | 102     | 177     | 6  |
| GO:000 |                                                                  | 18/171 | 121/23 | 0.00328 | 0.02038 | 0.01392 |    |
| 7030   | Golgi organization                                               | 0      | 210    | 326     | 343     | 342     | 18 |
| GO:001 |                                                                  |        | 35/232 | 0.00333 | 0.02062 | 0.01408 |    |
| 4823   | response to activity                                             | 8/1710 | 10     | 294     | 61      | 918     | 8  |
| GO:006 |                                                                  |        | 35/232 | 0.00333 | 0.02062 | 0.01408 |    |
| 0142   | regulation of syncytium formation by plasma membrane fusion      | 8/1710 | 10     | 294     | 61      | 918     | 8  |
| GO:190 |                                                                  |        | 35/232 | 0.00333 | 0.02062 | 0.01408 |    |
| 4707   | positive regulation of vascular smooth muscle cell proliferation | 8/1710 | 10     | 294     | 61      | 918     | 8  |
| GO:000 |                                                                  | 17/171 | 112/23 | 0.00340 | 0.02098 | 0.01433 |    |
| 8630   | intrinsic apoptotic signaling pathway in response to DNA damage  | 0      | 210    | 225     | 833     | 661     | 17 |
| GO:004 |                                                                  | 17/171 | 112/23 | 0.00340 | 0.02098 | 0.01433 |    |
| 6822   | regulation of nucleocytoplasmic transport                        | 0      | 210    | 225     | 833     | 661     | 17 |
| GO:190 |                                                                  | 17/171 | 112/23 | 0.00340 | 0.02098 | 0.01433 |    |
| 5330   | regulation of morphogenesis of an epithelium                     | 0      | 210    | 225     | 833     | 661     | 17 |
| GO:000 |                                                                  |        | 15/232 | 0.00346 | 0.02114 | 0.01444 |    |
| 9143   | nucleoside triphosphate catabolic process                        | 5/1710 | 10     | 586     | 742     | 528     | 5  |
| GO:001 | regulation of macrophage cytokine production                     | 5/1710 | 15/232 | 0.00346 | 0.02114 | 0.01444 | 5  |

|        |                                                                                |        |        |         |         |         |    |
|--------|--------------------------------------------------------------------------------|--------|--------|---------|---------|---------|----|
| 0935   |                                                                                |        | 10     | 586     | 742     | 528     |    |
| GO:003 |                                                                                |        | 15/232 | 0.00346 | 0.02114 | 0.01444 |    |
| 0730   | sequestering of triglyceride                                                   | 5/1710 | 10     | 586     | 742     | 528     | 5  |
| GO:004 |                                                                                |        | 15/232 | 0.00346 | 0.02114 | 0.01444 |    |
| 8681   | negative regulation of axon regeneration                                       | 5/1710 | 10     | 586     | 742     | 528     | 5  |
| GO:006 |                                                                                |        | 15/232 | 0.00346 | 0.02114 | 0.01444 |    |
| 1051   | positive regulation of cell growth involved in cardiac muscle cell development | 5/1710 | 10     | 586     | 742     | 528     | 5  |
| GO:007 |                                                                                |        | 15/232 | 0.00346 | 0.02114 | 0.01444 |    |
| 0293   | renal absorption                                                               | 5/1710 | 10     | 586     | 742     | 528     | 5  |
| GO:190 | regulation of transcription from RNA polymerase II promoter involved in heart  |        | 15/232 | 0.00346 | 0.02114 | 0.01444 |    |
| 1213   | development                                                                    | 5/1710 | 10     | 586     | 742     | 528     | 5  |
| GO:190 |                                                                                |        | 15/232 | 0.00346 | 0.02114 | 0.01444 |    |
| 2430   | negative regulation of amyloid-beta formation                                  | 5/1710 | 10     | 586     | 742     | 528     | 5  |
| GO:190 |                                                                                |        | 15/232 | 0.00346 | 0.02114 | 0.01444 |    |
| 3729   | regulation of plasma membrane organization                                     | 5/1710 | 10     | 586     | 742     | 528     | 5  |
| GO:003 |                                                                                | 13/171 | 76/232 | 0.00347 | 0.02114 | 0.01444 |    |
| 0168   | platelet activation                                                            | 0      | 10     | 784     | 742     | 528     | 13 |
| GO:001 |                                                                                |        | 28/232 | 0.00347 | 0.02114 | 0.01444 |    |
| 0719   | negative regulation of epithelial to mesenchymal transition                    | 7/1710 | 10     | 872     | 742     | 528     | 7  |
| GO:006 |                                                                                |        | 28/232 | 0.00347 | 0.02114 | 0.01444 |    |
| 0765   | regulation of androgen receptor signaling pathway                              | 7/1710 | 10     | 872     | 742     | 528     | 7  |
| GO:006 |                                                                                |        | 28/232 | 0.00347 | 0.02114 | 0.01444 |    |
| 1050   | regulation of cell growth involved in cardiac muscle cell development          | 7/1710 | 10     | 872     | 742     | 528     | 7  |
| GO:006 |                                                                                |        | 28/232 | 0.00347 | 0.02114 | 0.01444 |    |
| 1311   | cell surface receptor signaling pathway involved in heart development          | 7/1710 | 10     | 872     | 742     | 528     | 7  |
| GO:000 | phosphatidylinositol biosynthetic process                                      | 11/171 | 59/232 | 0.00350 | 0.02126 | 0.01452 | 11 |

|        |                                                              |        |        |         |         |         |    |
|--------|--------------------------------------------------------------|--------|--------|---------|---------|---------|----|
| 6661   |                                                              | 0      | 10     | 878     | 382     | 479     |    |
| GO:000 |                                                              | 11/171 | 59/232 | 0.00350 | 0.02126 | 0.01452 |    |
| 7029   | endoplasmic reticulum organization                           | 0      | 10     | 878     | 382     | 479     | 11 |
| GO:000 |                                                              | 11/171 | 59/232 | 0.00350 | 0.02126 | 0.01452 |    |
| 8347   | glial cell migration                                         | 0      | 10     | 878     | 382     | 479     | 11 |
| GO:006 |                                                              | 44/171 | 392/23 | 0.00352 | 0.02132 | 0.01456 |    |
| 0249   | anatomical structure homeostasis                             | 0      | 210    | 229     | 355     | 559     | 44 |
| GO:004 |                                                              |        | 43/232 | 0.00357 | 0.02162 | 0.01477 |    |
| 8246   | macrophage chemotaxis                                        | 9/1710 | 10     | 928     | 375     | 065     | 9  |
| GO:008 |                                                              |        | 43/232 | 0.00357 | 0.02162 | 0.01477 |    |
| 6002   | cardiac muscle cell action potential involved in contraction | 9/1710 | 10     | 928     | 375     | 065     | 9  |
| GO:004 |                                                              | 18/171 | 122/23 | 0.00359 | 0.02165 | 0.01479 |    |
| 8284   | organelle fusion                                             | 0      | 210    | 263     | 957     | 512     | 18 |
| GO:006 |                                                              | 18/171 | 122/23 | 0.00359 | 0.02165 | 0.01479 |    |
| 1013   | regulation of mRNA catabolic process                         | 0      | 210    | 263     | 957     | 512     | 18 |
| GO:001 |                                                              | 50/171 | 459/23 | 0.00360 | 0.02170 | 0.01482 |    |
| 0498   | proteasomal protein catabolic process                        | 0      | 210    | 435     | 784     | 809     | 50 |
| GO:003 |                                                              | 10/171 | 51/232 | 0.00361 | 0.02171 | 0.01483 |    |
| 0834   | regulation of actin filament depolymerization                | 0      | 10     | 306     | 372     | 21      | 10 |
| GO:004 |                                                              | 26/171 | 201/23 | 0.00361 | 0.02171 | 0.01483 |    |
| 8736   | appendage development                                        | 0      | 210    | 849     | 372     | 21      | 26 |
| GO:006 |                                                              | 26/171 | 201/23 | 0.00361 | 0.02171 | 0.01483 |    |
| 0173   | limb development                                             | 0      | 210    | 849     | 372     | 21      | 26 |
| GO:004 |                                                              | 35/171 | 295/23 | 0.00362 | 0.02171 | 0.01483 |    |
| 3405   | regulation of MAP kinase activity                            | 0      | 210    | 019     | 372     | 21      | 35 |
| GO:004 | positive regulation of innate immune response                | 29/171 | 232/23 | 0.00365 | 0.02189 | 0.01495 | 29 |

|        |                                                     |        |        |         |         |         |    |
|--------|-----------------------------------------------------|--------|--------|---------|---------|---------|----|
| 5089   |                                                     | 0      | 210    | 537     | 93      | 887     |    |
| GO:200 |                                                     | 22/171 | 161/23 | 0.00366 | 0.02189 | 0.01495 |    |
| 1236   | regulation of extrinsic apoptotic signaling pathway | 0      | 210    | 094     | 93      | 887     | 22 |
| GO:000 |                                                     | 53/171 | 493/23 | 0.00366 | 0.02189 | 0.01495 |    |
| 7346   | regulation of mitotic cell cycle                    | 0      | 210    | 238     | 93      | 887     | 53 |
| GO:000 |                                                     | 31/171 | 253/23 | 0.00368 | 0.02199 | 0.01502 |    |
| 5996   | monosaccharide metabolic process                    | 0      | 210    | 639     | 784     | 618     | 31 |
| GO:190 |                                                     | 31/171 | 253/23 | 0.00368 | 0.02199 | 0.01502 |    |
| 3311   | regulation of mRNA metabolic process                | 0      | 210    | 639     | 784     | 618     | 31 |
| GO:000 |                                                     | 12/171 | 68/232 | 0.00376 | 0.02243 | 0.01532 |    |
| 6855   | drug transmembrane transport                        | 0      | 10     | 773     | 739     | 643     | 12 |
| GO:003 |                                                     | 12/171 | 68/232 | 0.00376 | 0.02243 | 0.01532 |    |
| 4109   | homotypic cell-cell adhesion                        | 0      | 10     | 773     | 739     | 643     | 12 |
| GO:007 |                                                     | 20/171 | 142/23 | 0.00384 | 0.02285 | 0.01561 |    |
| 1331   | cellular response to hexose stimulus                | 0      | 210    | 225     | 789     | 366     | 20 |
| GO:000 |                                                     | 16/171 | 104/23 | 0.00385 | 0.02289 | 0.01564 |    |
| 6413   | translational initiation                            | 0      | 210    | 299     | 846     | 138     | 16 |
| GO:003 |                                                     | 13/171 | 77/232 | 0.00390 | 0.02317 | 0.01583 |    |
| 0193   | regulation of blood coagulation                     | 0      | 10     | 825     | 971     | 349     | 13 |
| GO:004 |                                                     | 13/171 | 77/232 | 0.00390 | 0.02317 | 0.01583 |    |
| 8635   | negative regulation of muscle organ development     | 0      | 10     | 825     | 971     | 349     | 13 |
| GO:004 |                                                     | 18/171 | 123/23 | 0.00392 | 0.02325 | 0.01588 |    |
| 2157   | lipoprotein metabolic process                       | 0      | 210    | 574     | 981     | 82      | 18 |
| GO:004 |                                                     | 15/171 | 95/232 | 0.00393 | 0.02326 | 0.01589 |    |
| 2158   | lipoprotein biosynthetic process                    | 0      | 10     | 087     | 662     | 286     | 15 |
| GO:003 | interleukin-1 beta production                       | 14/171 | 86/232 | 0.00395 | 0.02338 | 0.01597 | 14 |

|        |                                                           |        |        |         |         |         |    |
|--------|-----------------------------------------------------------|--------|--------|---------|---------|---------|----|
| 2611   |                                                           | 0      | 10     | 535     | 779     | 562     |    |
| GO:003 |                                                           | 28/171 | 223/23 | 0.00398 | 0.02351 | 0.01606 |    |
| 0073   | insulin secretion                                         | 0      | 210    | 055     | 303     | 117     | 28 |
| GO:004 |                                                           | 48/171 | 439/23 | 0.00398 | 0.02351 | 0.01606 |    |
| 2391   | regulation of membrane potential                          | 0      | 210    | 463     | 336     | 139     | 48 |
| GO:001 |                                                           | 47/171 | 428/23 | 0.00400 | 0.02360 | 0.01612 |    |
| 6055   | Wnt signaling pathway                                     | 0      | 210    | 783     | 498     | 398     | 47 |
| GO:004 |                                                           |        | 36/232 | 0.00401 | 0.02360 | 0.01612 |    |
| 8009   | insulin-like growth factor receptor signaling pathway     | 8/1710 | 10     | 314     | 498     | 398     | 8  |
| GO:007 |                                                           |        | 36/232 | 0.00401 | 0.02360 | 0.01612 |    |
| 1320   | cellular response to cAMP                                 | 8/1710 | 10     | 314     | 498     | 398     | 8  |
| GO:000 |                                                           | 11/171 | 60/232 | 0.00401 | 0.02360 | 0.01612 |    |
| 6446   | regulation of translational initiation                    | 0      | 10     | 632     | 498     | 398     | 11 |
| GO:000 |                                                           | 42/171 | 373/23 | 0.00405 | 0.02378 | 0.01624 |    |
| 9914   | hormone transport                                         | 0      | 210    | 149     | 775     | 883     | 42 |
| GO:004 |                                                           | 17/171 | 114/23 | 0.00409 | 0.02403 | 0.01641 |    |
| 3534   | blood vessel endothelial cell migration                   | 0      | 210    | 707     | 122     | 513     | 17 |
| GO:007 |                                                           | 20/171 | 143/23 | 0.00416 | 0.02428 | 0.01658 |    |
| 1326   | cellular response to monosaccharide stimulus              | 0      | 210    | 545     | 585     | 906     | 20 |
| GO:007 |                                                           | 20/171 | 143/23 | 0.00416 | 0.02428 | 0.01658 |    |
| 2073   | kidney epithelium development                             | 0      | 210    | 545     | 585     | 906     | 20 |
| GO:000 |                                                           | 38/171 | 330/23 | 0.00417 | 0.02428 | 0.01658 |    |
| 6869   | lipid transport                                           | 0      | 210    | 871     | 585     | 906     | 38 |
| GO:006 |                                                           | 10/171 | 52/232 | 0.00418 | 0.02428 | 0.01658 |    |
| 1614   | pri-miRNA transcription by RNA polymerase II              | 0      | 10     | 381     | 585     | 906     | 10 |
| GO:200 | regulation of transcription regulatory region DNA binding | 10/171 | 52/232 | 0.00418 | 0.02428 | 0.01658 | 10 |

|        |                                                          |        |        |         |         |         |    |
|--------|----------------------------------------------------------|--------|--------|---------|---------|---------|----|
| 0677   |                                                          | 0      | 10     | 381     | 585     | 906     |    |
| GO:004 |                                                          | 25/171 | 193/23 | 0.00419 | 0.02428 | 0.01658 |    |
| 8771   | tissue remodeling                                        | 0      | 210    | 327     | 585     | 906     | 25 |
| GO:001 |                                                          |        | 44/232 | 0.00421 | 0.02428 | 0.01658 |    |
| 4904   | myotube cell development                                 | 9/1710 | 10     | 101     | 585     | 906     | 9  |
| GO:005 |                                                          |        | 44/232 | 0.00421 | 0.02428 | 0.01658 |    |
| 0918   | positive chemotaxis                                      | 9/1710 | 10     | 101     | 585     | 906     | 9  |
| GO:006 |                                                          |        | 44/232 | 0.00421 | 0.02428 | 0.01658 |    |
| 1098   | positive regulation of protein tyrosine kinase activity  | 9/1710 | 10     | 101     | 585     | 906     | 9  |
| GO:001 |                                                          | 21/171 | 153/23 | 0.00422 | 0.02428 | 0.01658 |    |
| 0950   | positive regulation of endopeptidase activity            | 0      | 210    | 668     | 585     | 906     | 21 |
| GO:003 |                                                          | 21/171 | 153/23 | 0.00422 | 0.02428 | 0.01658 |    |
| 1056   | regulation of histone modification                       | 0      | 210    | 668     | 585     | 906     | 21 |
| GO:003 |                                                          |        | 22/232 | 0.00423 | 0.02428 | 0.01658 |    |
| 2331   | negative regulation of chondrocyte differentiation       | 6/1710 | 10     | 167     | 585     | 906     | 6  |
| GO:003 |                                                          |        | 22/232 | 0.00423 | 0.02428 | 0.01658 |    |
| 2897   | negative regulation of viral transcription               | 6/1710 | 10     | 167     | 585     | 906     | 6  |
| GO:010 |                                                          |        | 22/232 | 0.00423 | 0.02428 | 0.01658 |    |
| 1023   | vascular endothelial cell proliferation                  | 6/1710 | 10     | 167     | 585     | 906     | 6  |
| GO:190 |                                                          |        | 22/232 | 0.00423 | 0.02428 | 0.01658 |    |
| 1741   | positive regulation of myoblast fusion                   | 6/1710 | 10     | 167     | 585     | 906     | 6  |
| GO:190 |                                                          |        | 22/232 | 0.00423 | 0.02428 | 0.01658 |    |
| 3055   | positive regulation of extracellular matrix organization | 6/1710 | 10     | 167     | 585     | 906     | 6  |
| GO:190 |                                                          |        | 22/232 | 0.00423 | 0.02428 | 0.01658 |    |
| 5562   | regulation of vascular endothelial cell proliferation    | 6/1710 | 10     | 167     | 585     | 906     | 6  |
| GO:005 | protein tetramerization                                  | 24/171 | 183/23 | 0.00423 | 0.02428 | 0.01658 | 24 |



|        |                                                                                 |        |        |         |         |         |    |
|--------|---------------------------------------------------------------------------------|--------|--------|---------|---------|---------|----|
| 1262   |                                                                                 | 0      | 210    | 503     | 585     | 906     |    |
| GO:003 |                                                                                 | 16/171 | 105/23 | 0.00424 | 0.02428 | 0.01658 |    |
| 4754   | cellular hormone metabolic process                                              | 0      | 210    | 223     | 585     | 906     | 16 |
| GO:001 |                                                                                 | 12/171 | 69/232 | 0.00426 | 0.02428 | 0.01658 |    |
| 0633   | negative regulation of epithelial cell migration                                | 0      | 10     | 181     | 585     | 906     | 12 |
| GO:004 |                                                                                 | 12/171 | 69/232 | 0.00426 | 0.02428 | 0.01658 |    |
| 3407   | negative regulation of MAP kinase activity                                      | 0      | 10     | 181     | 585     | 906     | 12 |
| GO:190 |                                                                                 | 12/171 | 69/232 | 0.00426 | 0.02428 | 0.01658 |    |
| 3670   | regulation of sprouting angiogenesis                                            | 0      | 10     | 181     | 585     | 906     | 12 |
| GO:190 |                                                                                 | 12/171 | 69/232 | 0.00426 | 0.02428 | 0.01658 |    |
| 4589   | regulation of protein import                                                    | 0      | 10     | 181     | 585     | 906     | 12 |
| GO:000 |                                                                                 | 30/171 | 245/23 | 0.00427 | 0.02428 | 0.01658 |    |
| 7411   | axon guidance                                                                   | 0      | 210    | 232     | 585     | 906     | 30 |
| GO:005 |                                                                                 | 30/171 | 245/23 | 0.00427 | 0.02428 | 0.01658 |    |
| 1054   | positive regulation of DNA metabolic process                                    | 0      | 210    | 232     | 585     | 906     | 30 |
| GO:003 |                                                                                 | 18/171 | 124/23 | 0.00428 | 0.02428 | 0.01658 |    |
| 3138   | positive regulation of peptidyl-serine phosphorylation                          | 0      | 210    | 395     | 585     | 906     | 18 |
| GO:003 |                                                                                 |        | 10/232 | 0.00429 | 0.02428 | 0.01658 |    |
| 2908   | regulation of transforming growth factor beta1 production                       | 4/1710 | 10     | 746     | 585     | 906     | 4  |
| GO:004 |                                                                                 |        | 10/232 | 0.00429 | 0.02428 | 0.01658 |    |
| 4154   | histone H3-K14 acetylation                                                      | 4/1710 | 10     | 746     | 585     | 906     | 4  |
| GO:004 |                                                                                 |        | 10/232 | 0.00429 | 0.02428 | 0.01658 |    |
| 6543   | development of secondary female sexual characteristics                          | 4/1710 | 10     | 746     | 585     | 906     | 4  |
| GO:190 |                                                                                 |        | 10/232 | 0.00429 | 0.02428 | 0.01658 |    |
| 3749   | positive regulation of establishment of protein localization to mitochondrion   | 4/1710 | 10     | 746     | 585     | 906     | 4  |
| GO:190 | positive regulation of production of miRNAs involved in gene silencing by miRNA | 4/1710 | 10/232 | 0.00429 | 0.02428 | 0.01658 | 4  |

|        |                                                                          |        |        |         |         |         |    |
|--------|--------------------------------------------------------------------------|--------|--------|---------|---------|---------|----|
| 3800   |                                                                          |        | 10     | 746     | 585     | 906     |    |
| GO:190 |                                                                          |        | 10/232 | 0.00429 | 0.02428 | 0.01658 |    |
| 4851   | positive regulation of establishment of protein localization to telomere | 4/1710 | 10     | 746     | 585     | 906     | 4  |
| GO:190 |                                                                          |        | 10/232 | 0.00429 | 0.02428 | 0.01658 |    |
| 5097   | regulation of guanyl-nucleotide exchange factor activity                 | 4/1710 | 10     | 746     | 585     | 906     | 4  |
| GO:190 |                                                                          |        | 10/232 | 0.00429 | 0.02428 | 0.01658 |    |
| 5245   | regulation of aspartic-type peptidase activity                           | 4/1710 | 10     | 746     | 585     | 906     | 4  |
| GO:000 |                                                                          |        | 29/232 | 0.00429 | 0.02428 | 0.01658 |    |
| 7007   | inner mitochondrial membrane organization                                | 7/1710 | 10     | 845     | 585     | 906     | 7  |
| GO:007 |                                                                          |        | 29/232 | 0.00429 | 0.02428 | 0.01658 |    |
| 0296   | sarcoplasmic reticulum calcium ion transport                             | 7/1710 | 10     | 845     | 585     | 906     | 7  |
| GO:007 |                                                                          |        | 29/232 | 0.00429 | 0.02428 | 0.01658 |    |
| 1353   | cellular response to interleukin-4                                       | 7/1710 | 10     | 845     | 585     | 906     | 7  |
| GO:009 |                                                                          |        | 29/232 | 0.00429 | 0.02428 | 0.01658 |    |
| 9622   | cardiac muscle cell membrane repolarization                              | 7/1710 | 10     | 845     | 585     | 906     | 7  |
| GO:003 |                                                                          | 27/171 | 214/23 | 0.00433 | 0.02445 | 0.01670 |    |
| 3673   | negative regulation of kinase activity                                   | 0      | 210    | 23      | 343     | 354     | 27 |
| GO:019 |                                                                          | 47/171 | 430/23 | 0.00437 | 0.02467 | 0.01685 |    |
| 8738   | cell-cell signaling by wnt                                               | 0      | 210    | 591     | 573     | 539     | 47 |
| GO:005 |                                                                          | 13/171 | 78/232 | 0.00438 | 0.02467 | 0.01685 |    |
| 1881   | regulation of mitochondrial membrane potential                           | 0      | 10     | 072     | 906     | 766     | 13 |
| GO:000 |                                                                          | 26/171 | 204/23 | 0.00441 | 0.02485 | 0.01697 |    |
| 7160   | cell-matrix adhesion                                                     | 0      | 210    | 575     | 128     | 53      | 26 |
| GO:000 |                                                                          | 19/171 | 134/23 | 0.00441 | 0.02485 | 0.01697 |    |
| 6633   | fatty acid biosynthetic process                                          | 0      | 210    | 98      | 128     | 53      | 19 |
| GO:001 | macroautophagy                                                           | 25/171 | 194/23 | 0.00448 | 0.02519 | 0.01721 | 25 |

|        |                                                  |        |        |         |         |         |    |
|--------|--------------------------------------------------|--------|--------|---------|---------|---------|----|
| 6236   |                                                  | 0      | 210    | 567     | 74      | 172     |    |
| GO:000 |                                                  | 28/171 | 225/23 | 0.00450 | 0.02529 | 0.01727 |    |
| 6650   | glycerophospholipid metabolic process            | 0      | 210    | 92      | 028     | 517     | 28 |
| GO:000 |                                                  | 20/171 | 144/23 | 0.00451 | 0.02529 | 0.01727 |    |
| 7613   | memory                                           | 0      | 210    | 086     | 028     | 517     | 20 |
| GO:000 |                                                  | 11/171 | 61/232 | 0.00458 | 0.02563 | 0.01750 |    |
| 6493   | protein O-linked glycosylation                   | 0      | 10     | 067     | 242     | 888     | 11 |
| GO:004 |                                                  | 11/171 | 61/232 | 0.00458 | 0.02563 | 0.01750 |    |
| 8286   | lung alveolus development                        | 0      | 10     | 067     | 242     | 888     | 11 |
| GO:003 |                                                  | 27/171 | 215/23 | 0.00461 | 0.02580 | 0.01762 |    |
| 5265   | organ growth                                     | 0      | 210    | 606     | 575     | 727     | 27 |
| GO:004 |                                                  | 39/171 | 343/23 | 0.00464 | 0.02593 | 0.01771 |    |
| 4403   | symbiont process                                 | 0      | 210    | 384     | 624     | 64      | 39 |
| GO:005 |                                                  | 40/171 | 354/23 | 0.00465 | 0.02596 | 0.01773 |    |
| 0727   | regulation of inflammatory response              | 0      | 210    | 893     | 901     | 879     | 40 |
| GO:004 |                                                  | 16/171 | 106/23 | 0.00466 | 0.02596 | 0.01773 |    |
| 6474   | glycerophospholipid biosynthetic process         | 0      | 210    | 304     | 901     | 879     | 16 |
| GO:006 |                                                  | 16/171 | 106/23 | 0.00466 | 0.02596 | 0.01773 |    |
| 0840   | artery development                               | 0      | 210    | 304     | 901     | 879     | 16 |
| GO:001 |                                                  | 18/171 | 125/23 | 0.00466 | 0.02597 | 0.01774 |    |
| 8107   | peptidyl-threonine phosphorylation               | 0      | 210    | 864     | 543     | 318     | 18 |
| GO:004 |                                                  | 26/171 | 205/23 | 0.00471 | 0.02619 | 0.01789 |    |
| 2098   | T cell proliferation                             | 0      | 210    | 22      | 285     | 169     | 26 |
| GO:000 |                                                  |        | 16/232 | 0.00473 | 0.02621 | 0.01790 |    |
| 2689   | negative regulation of leukocyte chemotaxis      | 5/1710 | 10     | 856     | 465     | 658     | 5  |
| GO:000 | activation of NF-kappaB-inducing kinase activity | 5/1710 | 16/232 | 0.00473 | 0.02621 | 0.01790 | 5  |

|        |                                                                               |        |        |         |         |         |    |
|--------|-------------------------------------------------------------------------------|--------|--------|---------|---------|---------|----|
| 7250   |                                                                               |        | 10     | 856     | 465     | 658     |    |
| GO:003 |                                                                               |        | 16/232 | 0.00473 | 0.02621 | 0.01790 |    |
| 4134   | toll-like receptor 2 signaling pathway                                        | 5/1710 | 10     | 856     | 465     | 658     | 5  |
| GO:004 |                                                                               |        | 16/232 | 0.00473 | 0.02621 | 0.01790 |    |
| 2407   | cristae formation                                                             | 5/1710 | 10     | 856     | 465     | 658     | 5  |
| GO:004 |                                                                               |        | 16/232 | 0.00473 | 0.02621 | 0.01790 |    |
| 5947   | negative regulation of translational initiation                               | 5/1710 | 10     | 856     | 465     | 658     | 5  |
| GO:001 |                                                                               | 28/171 | 226/23 | 0.00479 | 0.02642 | 0.01805 |    |
| 0948   | negative regulation of cell cycle process                                     | 0      | 210    | 488     | 959     | 34      | 28 |
| GO:004 |                                                                               | 25/171 | 195/23 | 0.00479 | 0.02642 | 0.01805 |    |
| 2180   | cellular ketone metabolic process                                             | 0      | 210    | 492     | 959     | 34      | 25 |
| GO:008 |                                                                               |        | 37/232 | 0.00479 | 0.02642 | 0.01805 |    |
| 6065   | cell communication involved in cardiac conduction                             | 8/1710 | 10     | 551     | 959     | 34      | 8  |
| GO:190 |                                                                               |        | 37/232 | 0.00479 | 0.02642 | 0.01805 |    |
| 2229   | regulation of intrinsic apoptotic signaling pathway in response to DNA damage | 8/1710 | 10     | 551     | 959     | 34      | 8  |
| GO:001 |                                                                               | 10/171 | 53/232 | 0.00482 | 0.02648 | 0.01808 |    |
| 0517   | regulation of phospholipase activity                                          | 0      | 10     | 336     | 316     | 999     | 10 |
| GO:004 |                                                                               | 10/171 | 53/232 | 0.00482 | 0.02648 | 0.01808 |    |
| 8662   | negative regulation of smooth muscle cell proliferation                       | 0      | 10     | 336     | 316     | 999     | 10 |
| GO:190 |                                                                               | 10/171 | 53/232 | 0.00482 | 0.02648 | 0.01808 |    |
| 4705   | regulation of vascular smooth muscle cell proliferation                       | 0      | 10     | 336     | 316     | 999     | 10 |
| GO:199 |                                                                               | 10/171 | 53/232 | 0.00482 | 0.02648 | 0.01808 |    |
| 0874   | vascular smooth muscle cell proliferation                                     | 0      | 10     | 336     | 316     | 999     | 10 |
| GO:005 |                                                                               | 24/171 | 185/23 | 0.00486 | 0.02666 | 0.01821 |    |
| 1668   | localization within membrane                                                  | 0      | 210    | 108     | 521     | 435     | 24 |
| GO:003 | skeletal muscle cell differentiation                                          | 14/171 | 88/232 | 0.00488 | 0.02677 | 0.01829 | 14 |

|        |                                                            |        |        |         |         |         |    |
|--------|------------------------------------------------------------|--------|--------|---------|---------|---------|----|
| 5914   |                                                            | 0      | 10     | 8       | 924     | 224     |    |
| GO:001 |                                                            | 41/171 | 366/23 | 0.00489 | 0.02677 | 0.01829 |    |
| 6311   | dephosphorylation                                          | 0      | 210    | 104     | 924     | 224     | 41 |
| GO:005 |                                                            | 13/171 | 79/232 | 0.00489 | 0.02679 | 0.01830 |    |
| 1781   | positive regulation of cell division                       | 0      | 10     | 813     | 298     | 163     | 13 |
| GO:004 |                                                            |        | 45/232 | 0.00492 | 0.02688 | 0.01836 |    |
| 2987   | amyloid precursor protein catabolic process                | 9/1710 | 10     | 642     | 486     | 439     | 9  |
| GO:190 |                                                            |        | 45/232 | 0.00492 | 0.02688 | 0.01836 |    |
| 2893   | regulation of pri-miRNA transcription by RNA polymerase II | 9/1710 | 10     | 642     | 486     | 439     | 9  |
| GO:004 |                                                            | 22/171 | 165/23 | 0.00492 | 0.02688 | 0.01836 |    |
| 3122   | regulation of I-kappaB kinase/NF-kappaB signaling          | 0      | 210    | 874     | 486     | 439     | 22 |
| GO:001 |                                                            | 48/171 | 444/23 | 0.00493 | 0.02692 | 0.01838 |    |
| 6569   | covalent chromatin modification                            | 0      | 210    | 981     | 013     | 848     | 48 |
| GO:001 |                                                            | 32/171 | 269/23 | 0.00502 | 0.02738 | 0.01870 |    |
| 0038   | response to metal ion                                      | 0      | 210    | 967     | 429     | 553     | 32 |
| GO:003 |                                                            | 18/171 | 126/23 | 0.00508 | 0.02763 | 0.01887 |    |
| 1623   | receptor internalization                                   | 0      | 210    | 126     | 938     | 978     | 18 |
| GO:004 |                                                            |        | 30/232 | 0.00525 | 0.02846 | 0.01944 |    |
| 2168   | heme metabolic process                                     | 7/1710 | 10     | 61      | 221     | 183     | 7  |
| GO:006 |                                                            |        | 30/232 | 0.00525 | 0.02846 | 0.01944 |    |
| 1037   | negative regulation of cartilage development               | 7/1710 | 10     | 61      | 221     | 183     | 7  |
| GO:006 |                                                            |        | 30/232 | 0.00525 | 0.02846 | 0.01944 |    |
| 1082   | myeloid leukocyte cytokine production                      | 7/1710 | 10     | 61      | 221     | 183     | 7  |
| GO:190 |                                                            |        | 30/232 | 0.00525 | 0.02846 | 0.01944 |    |
| 2003   | regulation of amyloid-beta formation                       | 7/1710 | 10     | 61      | 221     | 183     | 7  |
| GO:000 | pattern specification process                              | 50/171 | 468/23 | 0.00525 | 0.02846 | 0.01944 | 50 |

|        |                                                                                   |        |        |         |         |         |    |
|--------|-----------------------------------------------------------------------------------|--------|--------|---------|---------|---------|----|
| 7389   |                                                                                   | 0      | 210    | 858     | 221     | 183     |    |
| GO:004 |                                                                                   | 23/171 | 176/23 | 0.00526 | 0.02846 | 0.01944 |    |
| 8592   | eye morphogenesis                                                                 | 0      | 210    | 176     | 221     | 183     | 23 |
| GO:000 |                                                                                   | 21/171 | 156/23 | 0.00530 | 0.02863 | 0.01955 |    |
| 7596   | blood coagulation                                                                 | 0      | 210    | 26      | 01      | 651     | 21 |
| GO:005 |                                                                                   | 21/171 | 156/23 | 0.00530 | 0.02863 | 0.01955 |    |
| 1302   | regulation of cell division                                                       | 0      | 210    | 26      | 01      | 651     | 21 |
| GO:000 |                                                                                   | 26/171 | 207/23 | 0.00535 | 0.02888 | 0.01973 |    |
| 6402   | mRNA catabolic process                                                            | 0      | 210    | 518     | 731     | 221     | 26 |
| GO:000 |                                                                                   |        | 23/232 | 0.00537 | 0.02890 | 0.01974 |    |
| 0272   | polysaccharide catabolic process                                                  | 6/1710 | 10     | 348     | 594     | 494     | 6  |
| GO:006 |                                                                                   |        | 23/232 | 0.00537 | 0.02890 | 0.01974 |    |
| 0390   | regulation of SMAD protein signal transduction                                    | 6/1710 | 10     | 348     | 594     | 494     | 6  |
| GO:190 |                                                                                   |        | 23/232 | 0.00537 | 0.02890 | 0.01974 |    |
| 3020   | positive regulation of glycoprotein metabolic process                             | 6/1710 | 10     | 348     | 594     | 494     | 6  |
| GO:002 |                                                                                   | 30/171 | 249/23 | 0.00539 | 0.02895 | 0.01977 |    |
| 1537   | telencephalon development                                                         | 0      | 210    | 247     | 481     | 832     | 30 |
| GO:009 |                                                                                   | 30/171 | 249/23 | 0.00539 | 0.02895 | 0.01977 |    |
| 0068   | positive regulation of cell cycle process                                         | 0      | 210    | 247     | 481     | 832     | 30 |
| GO:001 |                                                                                   | 12/171 | 71/232 | 0.00540 | 0.02899 | 0.01980 |    |
| 4068   | positive regulation of phosphatidylinositol 3-kinase signaling                    | 0      | 10     | 523     | 667     | 691     | 12 |
| GO:003 |                                                                                   | 14/171 | 89/232 | 0.00541 | 0.02903 | 0.01983 |    |
| 1016   | pancreas development                                                              | 0      | 10     | 672     | 164     | 08      | 14 |
| GO:004 | negative regulation of cysteine-type endopeptidase activity involved in apoptotic | 13/171 | 80/232 | 0.00546 | 0.02922 | 0.01996 |    |
| 3154   | process                                                                           | 0      | 10     | 346     | 85      | 527     | 13 |
| GO:190 | positive regulation of calcium ion transmembrane transport                        | 13/171 | 80/232 | 0.00546 | 0.02922 | 0.01996 | 13 |

|        |                                                                          |        |        |         |         |         |    |
|--------|--------------------------------------------------------------------------|--------|--------|---------|---------|---------|----|
| 4427   |                                                                          | 0      | 10     | 346     | 85      | 527     |    |
| GO:003 |                                                                          | 10/171 | 54/232 | 0.00553 | 0.02956 | 0.02019 |    |
| 2964   | collagen biosynthetic process                                            | 0      | 10     | 717     | 87      | 765     | 10 |
| GO:005 |                                                                          | 10/171 | 54/232 | 0.00553 | 0.02956 | 0.02019 |    |
| 1496   | positive regulation of stress fiber assembly                             | 0      | 10     | 717     | 87      | 765     | 10 |
| GO:004 |                                                                          | 43/171 | 391/23 | 0.00558 | 0.02977 | 0.02034 |    |
| 3900   | regulation of multi-organism process                                     | 0      | 210    | 163     | 888     | 122     | 43 |
| GO:003 |                                                                          | 38/171 | 336/23 | 0.00562 | 0.02996 | 0.02046 |    |
| 2102   | negative regulation of response to external stimulus                     | 0      | 210    | 193     | 655     | 941     | 38 |
| GO:004 |                                                                          | 19/171 | 137/23 | 0.00563 | 0.02999 | 0.02049 |    |
| 8593   | camera-type eye morphogenesis                                            | 0      | 210    | 292     | 773     | 071     | 19 |
| GO:000 |                                                                          |        | 38/232 | 0.00568 | 0.03024 | 0.02065 |    |
| 6778   | porphyrin-containing compound metabolic process                          | 8/1710 | 10     | 956     | 423     | 909     | 8  |
| GO:007 |                                                                          |        | 38/232 | 0.00568 | 0.03024 | 0.02065 |    |
| 0570   | regulation of neuron projection regeneration                             | 8/1710 | 10     | 956     | 423     | 909     | 8  |
| GO:000 |                                                                          | 26/171 | 208/23 | 0.00570 | 0.03026 | 0.02067 |    |
| 7623   | circadian rhythm                                                         | 0      | 210    | 31      | 113     | 063     | 26 |
| GO:190 |                                                                          | 26/171 | 208/23 | 0.00570 | 0.03026 | 0.02067 |    |
| 3050   | regulation of proteolysis involved in cellular protein catabolic process | 0      | 210    | 31      | 113     | 063     | 26 |
| GO:001 |                                                                          |        | 46/232 | 0.00573 | 0.03036 | 0.02073 |    |
| 9674   | NAD metabolic process                                                    | 9/1710 | 10     | 263     | 265     | 998     | 9  |
| GO:004 |                                                                          |        | 46/232 | 0.00573 | 0.03036 | 0.02073 |    |
| 5010   | actin nucleation                                                         | 9/1710 | 10     | 263     | 265     | 998     | 9  |
| GO:003 |                                                                          | 34/171 | 293/23 | 0.00576 | 0.03047 | 0.02081 |    |
| 0100   | regulation of endocytosis                                                | 0      | 210    | 356     | 125     | 416     | 34 |
| GO:005 | neuron apoptotic process                                                 | 34/171 | 293/23 | 0.00576 | 0.03047 | 0.02081 | 34 |

|        |                                                     |        |        |         |         |         |    |
|--------|-----------------------------------------------------|--------|--------|---------|---------|---------|----|
| 1402   |                                                     | 0      | 210    | 356     | 125     | 416     |    |
| GO:004 |                                                     | 15/171 | 99/232 | 0.00582 | 0.03074 | 0.02099 |    |
| 5639   | positive regulation of myeloid cell differentiation | 0      | 10     | 49      | 187     | 901     | 15 |
| GO:000 |                                                     | 31/171 | 261/23 | 0.00582 | 0.03074 | 0.02099 |    |
| 6520   | cellular amino acid metabolic process               | 0      | 210    | 527     | 187     | 901     | 31 |
| GO:004 |                                                     | 36/171 | 315/23 | 0.00585 | 0.03087 | 0.02109 |    |
| 8872   | homeostasis of number of cells                      | 0      | 210    | 648     | 866     | 245     | 36 |
| GO:004 |                                                     | 39/171 | 348/23 | 0.00590 | 0.03110 | 0.02124 |    |
| 3010   | camera-type eye development                         | 0      | 210    | 428     | 264     | 545     | 39 |
| GO:006 |                                                     | 14/171 | 90/232 | 0.00599 | 0.03152 | 0.02153 |    |
| 0395   | SMAD protein signal transduction                    | 0      | 10     | 047     | 821     | 614     | 14 |
| GO:001 |                                                     | 23/171 | 178/23 | 0.00603 | 0.03173 | 0.02167 |    |
| 0951   | negative regulation of endopeptidase activity       | 0      | 210    | 5       | 397     | 67      | 23 |
| GO:190 |                                                     | 34/171 | 294/23 | 0.00606 | 0.03187 | 0.02177 |    |
| 2105   | regulation of leukocyte differentiation             | 0      | 210    | 912     | 137     | 055     | 34 |
| GO:000 |                                                     | 13/171 | 81/232 | 0.00607 | 0.03187 | 0.02177 |    |
| 6664   | glycolipid metabolic process                        | 0      | 10     | 975     | 137     | 055     | 13 |
| GO:005 |                                                     | 13/171 | 81/232 | 0.00607 | 0.03187 | 0.02177 |    |
| 0818   | regulation of coagulation                           | 0      | 10     | 975     | 137     | 055     | 13 |
| GO:004 |                                                     | 48/171 | 449/23 | 0.00608 | 0.03187 | 0.02177 |    |
| 8608   | reproductive structure development                  | 0      | 210    | 374     | 137     | 055     | 48 |
| GO:000 |                                                     | 19/171 | 138/23 | 0.00609 | 0.03187 | 0.02177 |    |
| 7050   | cell cycle arrest                                   | 0      | 210    | 32      | 137     | 055     | 19 |
| GO:003 |                                                     | 28/171 | 230/23 | 0.00609 | 0.03187 | 0.02177 |    |
| 6293   | response to decreased oxygen levels                 | 0      | 210    | 386     | 137     | 055     | 28 |
| GO:000 | adult locomotory behavior                           | 16/171 | 109/23 | 0.00613 | 0.03198 | 0.02185 | 16 |



|        |                                                                    |        |        |         |         |         |    |
|--------|--------------------------------------------------------------------|--------|--------|---------|---------|---------|----|
| 8344   |                                                                    | 0      | 210    | 368     | 893     | 085     |    |
| GO:003 |                                                                    | 16/171 | 109/23 | 0.00613 | 0.03198 | 0.02185 |    |
| 2963   | collagen metabolic process                                         | 0      | 210    | 368     | 893     | 085     | 16 |
| GO:000 |                                                                    | 20/171 | 148/23 | 0.00613 | 0.03198 | 0.02185 |    |
| 3231   | cardiac ventricle development                                      | 0      | 210    | 779     | 893     | 085     | 20 |
| GO:000 |                                                                    | 21/171 | 158/23 | 0.00613 | 0.03198 | 0.02185 |    |
| 7599   | hemostasis                                                         | 0      | 210    | 824     | 893     | 085     | 21 |
| GO:000 |                                                                    | 37/171 | 327/23 | 0.00617 | 0.03216 | 0.02196 |    |
| 7204   | positive regulation of cytosolic calcium ion concentration         | 0      | 210    | 7       | 223     | 923     | 37 |
| GO:001 |                                                                    | 46/171 | 427/23 | 0.00621 | 0.03232 | 0.02208 |    |
| 6570   | histone modification                                               | 0      | 210    | 445     | 843     | 275     | 46 |
| GO:000 |                                                                    |        | 17/232 | 0.00631 | 0.03250 | 0.02220 |    |
| 1820   | serotonin secretion                                                | 5/1710 | 10     | 076     | 487     | 328     | 5  |
| GO:000 |                                                                    |        | 17/232 | 0.00631 | 0.03250 | 0.02220 |    |
| 7096   | regulation of exit from mitosis                                    | 5/1710 | 10     | 076     | 487     | 328     | 5  |
| GO:001 |                                                                    |        | 17/232 | 0.00631 | 0.03250 | 0.02220 |    |
| 0934   | macrophage cytokine production                                     | 5/1710 | 10     | 076     | 487     | 328     | 5  |
| GO:003 |                                                                    |        | 17/232 | 0.00631 | 0.03250 | 0.02220 |    |
| 5269   | protein O-linked mannosylation                                     | 5/1710 | 10     | 076     | 487     | 328     | 5  |
| GO:007 |                                                                    |        | 17/232 | 0.00631 | 0.03250 | 0.02220 |    |
| 0571   | negative regulation of neuron projection regeneration              | 5/1710 | 10     | 076     | 487     | 328     | 5  |
| GO:190 |                                                                    |        | 17/232 | 0.00631 | 0.03250 | 0.02220 |    |
| 2992   | negative regulation of amyloid precursor protein catabolic process | 5/1710 | 10     | 076     | 487     | 328     | 5  |
| GO:000 |                                                                    | 10/171 | 55/232 | 0.00633 | 0.03250 | 0.02220 |    |
| 2833   | positive regulation of response to biotic stimulus                 | 0      | 10     | 086     | 487     | 328     | 10 |
| GO:003 | actin filament depolymerization                                    | 10/171 | 55/232 | 0.00633 | 0.03250 | 0.02220 | 10 |

|        |                                                                        |        |        |         |         |         |    |
|--------|------------------------------------------------------------------------|--------|--------|---------|---------|---------|----|
| 0042   |                                                                        | 0      | 10     | 086     | 487     | 328     |    |
| GO:200 |                                                                        | 17/171 | 119/23 | 0.00635 | 0.03250 | 0.02220 |    |
| 0278   | regulation of DNA biosynthetic process                                 | 0      | 210    | 523     | 487     | 328     | 17 |
| GO:000 |                                                                        |        | 11/232 | 0.00636 | 0.03250 | 0.02220 |    |
| 2468   | dendritic cell antigen processing and presentation                     | 4/1710 | 10     | 231     | 487     | 328     | 4  |
| GO:000 |                                                                        |        | 11/232 | 0.00636 | 0.03250 | 0.02220 |    |
| 3263   | cardioblast proliferation                                              | 4/1710 | 10     | 231     | 487     | 328     | 4  |
| GO:000 |                                                                        |        | 11/232 | 0.00636 | 0.03250 | 0.02220 |    |
| 3266   | regulation of secondary heart field cardioblast proliferation          | 4/1710 | 10     | 231     | 487     | 328     | 4  |
| GO:003 |                                                                        |        | 11/232 | 0.00636 | 0.03250 | 0.02220 |    |
| 1077   | post-embryonic camera-type eye development                             | 4/1710 | 10     | 231     | 487     | 328     | 4  |
| GO:003 |                                                                        |        | 11/232 | 0.00636 | 0.03250 | 0.02220 |    |
| 2905   | transforming growth factor beta1 production                            | 4/1710 | 10     | 231     | 487     | 328     | 4  |
| GO:004 |                                                                        |        | 11/232 | 0.00636 | 0.03250 | 0.02220 |    |
| 8312   | intracellular distribution of mitochondria                             | 4/1710 | 10     | 231     | 487     | 328     | 4  |
| GO:007 |                                                                        |        | 11/232 | 0.00636 | 0.03250 | 0.02220 |    |
| 0203   | regulation of establishment of protein localization to telomere        | 4/1710 | 10     | 231     | 487     | 328     | 4  |
| GO:008 |                                                                        |        | 11/232 | 0.00636 | 0.03250 | 0.02220 |    |
| 6103   | G protein-coupled receptor signaling pathway involved in heart process | 4/1710 | 10     | 231     | 487     | 328     | 4  |
| GO:009 |                                                                        |        | 11/232 | 0.00636 | 0.03250 | 0.02220 |    |
| 7084   | vascular smooth muscle cell development                                | 4/1710 | 10     | 231     | 487     | 328     | 4  |
| GO:190 |                                                                        |        | 11/232 | 0.00636 | 0.03250 | 0.02220 |    |
| 1163   | regulation of trophoblast cell migration                               | 4/1710 | 10     | 231     | 487     | 328     | 4  |
| GO:000 |                                                                        |        | 31/232 | 0.00636 | 0.03250 | 0.02220 |    |
| 2026   | regulation of the force of heart contraction                           | 7/1710 | 10     | 521     | 487     | 328     | 7  |
| GO:004 | neurotrophin TRK receptor signaling pathway                            | 7/1710 | 31/232 | 0.00636 | 0.03250 | 0.02220 | 7  |

|        |                                                                 |        |        |         |         |           |
|--------|-----------------------------------------------------------------|--------|--------|---------|---------|-----------|
| 8011   |                                                                 | 10     | 521    | 487     | 328     |           |
| GO:000 |                                                                 | 41/171 | 372/23 | 0.00644 | 0.03288 | 0.02246   |
| 1505   | regulation of neurotransmitter levels                           | 0      | 210    | 445     | 078     | 005 41    |
| GO:001 |                                                                 | 21/171 | 159/23 | 0.00659 | 0.03356 | 0.02292   |
| 0970   | transport along microtubule                                     | 0      | 210    | 49      | 045     | 432 21    |
| GO:005 |                                                                 | 21/171 | 159/23 | 0.00659 | 0.03356 | 0.02292   |
| 0817   | coagulation                                                     | 0      | 210    | 49      | 045     | 432 21    |
| GO:009 |                                                                 | 21/171 | 159/23 | 0.00659 | 0.03356 | 0.02292   |
| 9111   | microtubule-based transport                                     | 0      | 210    | 49      | 045     | 432 21    |
| GO:000 |                                                                 |        | 47/232 | 0.00663 | 0.03374 | 0.02305   |
| 3179   | heart valve morphogenesis                                       | 9/1710 | 10     | 689     | 476     | 022 9     |
| GO:004 |                                                                 | 11/171 | 64/232 | 0.00665 | 0.03376 | 0.02306   |
| 2267   | natural killer cell mediated cytotoxicity                       | 0      | 10     | 822     | 505     | 408 11    |
| GO:004 |                                                                 | 11/171 | 64/232 | 0.00665 | 0.03376 | 0.02306   |
| 2306   | regulation of protein import into nucleus                       | 0      | 10     | 822     | 505     | 408 11    |
| GO:190 |                                                                 | 11/171 | 64/232 | 0.00665 | 0.03376 | 0.02306   |
| 3391   | regulation of adherens junction organization                    | 0      | 10     | 822     | 505     | 408 11    |
| GO:000 |                                                                 | 16/171 | 110/23 | 0.00669 | 0.03381 | 0.02309   |
| 6986   | response to unfolded protein                                    | 0      | 210    | 979     | 138     | 572 16    |
| GO:004 |                                                                 |        | 39/232 | 0.00670 | 0.03381 | 0.02309   |
| 6885   | regulation of hormone biosynthetic process                      | 8/1710 | 10     | 5       | 138     | 572 8     |
| GO:006 |                                                                 |        | 39/232 | 0.00670 | 0.03381 | 0.02309   |
| 0251   | regulation of glial cell proliferation                          | 8/1710 | 10     | 5       | 138     | 572 8     |
| GO:009 |                                                                 |        | 39/232 | 0.00670 | 0.03381 | 0.02309   |
| 0049   | regulation of cell migration involved in sprouting angiogenesis | 8/1710 | 10     | 5       | 138     | 572 8     |
| GO:000 | atrioventricular valve morphogenesis                            | 6/1710 | 24/232 | 0.00672 | 0.03381 | 0.02309 6 |

|        |                                                           |        |        |         |         |         |    |
|--------|-----------------------------------------------------------|--------|--------|---------|---------|---------|----|
| 3181   |                                                           |        | 10     | 523     | 138     | 572     |    |
| GO:003 |                                                           |        | 24/232 | 0.00672 | 0.03381 | 0.02309 |    |
| 2352   | positive regulation of hormone metabolic process          | 6/1710 | 10     | 523     | 138     | 572     | 6  |
| GO:004 |                                                           |        | 24/232 | 0.00672 | 0.03381 | 0.02309 |    |
| 6685   | response to arsenic-containing substance                  | 6/1710 | 10     | 523     | 138     | 572     | 6  |
| GO:007 |                                                           |        | 24/232 | 0.00672 | 0.03381 | 0.02309 |    |
| 0584   | mitochondrion morphogenesis                               | 6/1710 | 10     | 523     | 138     | 572     | 6  |
| GO:190 |                                                           |        | 24/232 | 0.00672 | 0.03381 | 0.02309 |    |
| 2683   | regulation of receptor localization to synapse            | 6/1710 | 10     | 523     | 138     | 572     | 6  |
| GO:200 |                                                           |        | 24/232 | 0.00672 | 0.03381 | 0.02309 |    |
| 0637   | positive regulation of gene silencing by miRNA            | 6/1710 | 10     | 523     | 138     | 572     | 6  |
| GO:190 |                                                           | 13/171 | 82/232 | 0.00675 | 0.03390 | 0.02316 |    |
| 3509   | liposaccharide metabolic process                          | 0      | 10     | 014     | 74      | 131     | 13 |
| GO:005 |                                                           | 12/171 | 73/232 | 0.00677 | 0.03396 | 0.02320 |    |
| 0810   | regulation of steroid biosynthetic process                | 0      | 10     | 987     | 914     | 349     | 12 |
| GO:005 |                                                           | 12/171 | 73/232 | 0.00677 | 0.03396 | 0.02320 |    |
| 1851   | modification by host of symbiont morphology or physiology | 0      | 10     | 987     | 914     | 349     | 12 |
| GO:190 |                                                           | 12/171 | 73/232 | 0.00677 | 0.03396 | 0.02320 |    |
| 3036   | positive regulation of response to wounding               | 0      | 10     | 987     | 914     | 349     | 12 |
| GO:001 |                                                           | 36/171 | 318/23 | 0.00678 | 0.03398 | 0.02321 |    |
| 8105   | peptidyl-serine phosphorylation                           | 0      | 210    | 791     | 029     | 11      | 36 |
| GO:004 |                                                           | 31/171 | 264/23 | 0.00685 | 0.03428 | 0.02342 |    |
| 3523   | regulation of neuron apoptotic process                    | 0      | 210    | 825     | 889     | 19      | 31 |
| GO:001 |                                                           | 26/171 | 211/23 | 0.00686 | 0.03428 | 0.02342 |    |
| 0810   | regulation of cell-substrate adhesion                     | 0      | 210    | 13      | 889     | 19      | 26 |
| GO:190 | regulation of hemopoiesis                                 | 44/171 | 407/23 | 0.00689 | 0.03440 | 0.02350 | 44 |

|        |                                                                  |        |        |         |         |         |    |
|--------|------------------------------------------------------------------|--------|--------|---------|---------|---------|----|
| 3706   |                                                                  | 0      | 210    | 104     | 806     | 33      |    |
| GO:004 |                                                                  | 22/171 | 170/23 | 0.00700 | 0.03494 | 0.02387 |    |
| 2129   | regulation of T cell proliferation                               | 0      | 210    | 469     | 571     | 055     | 22 |
| GO:005 |                                                                  | 15/171 | 101/23 | 0.00701 | 0.03497 | 0.02388 |    |
| 0848   | regulation of calcium-mediated signaling                         | 0      | 210    | 569     | 068     | 761     | 15 |
| GO:005 |                                                                  | 41/171 | 374/23 | 0.00704 | 0.03509 | 0.02397 |    |
| 1480   | regulation of cytosolic calcium ion concentration                | 0      | 210    | 679     | 578     | 306     | 41 |
| GO:004 |                                                                  | 21/171 | 160/23 | 0.00707 | 0.03522 | 0.02406 |    |
| 3433   | negative regulation of DNA-binding transcription factor activity | 0      | 210    | 899     | 611     | 209     | 21 |
| GO:005 |                                                                  | 19/171 | 140/23 | 0.00710 | 0.03533 | 0.02413 |    |
| 0921   | positive regulation of chemotaxis                                | 0      | 210    | 594     | 013     | 314     | 19 |
| GO:007 |                                                                  | 20/171 | 150/23 | 0.00711 | 0.03534 | 0.02414 |    |
| 1322   | cellular response to carbohydrate stimulus                       | 0      | 210    | 547     | 742     | 495     | 20 |
| GO:006 |                                                                  | 48/171 | 453/23 | 0.00715 | 0.03550 | 0.02425 |    |
| 1458   | reproductive system development                                  | 0      | 210    | 366     | 694     | 392     | 48 |
| GO:002 |                                                                  | 10/171 | 56/232 | 0.00721 | 0.03572 | 0.02440 |    |
| 1575   | hindbrain morphogenesis                                          | 0      | 10     | 016     | 668     | 401     | 10 |
| GO:009 |                                                                  | 10/171 | 56/232 | 0.00721 | 0.03572 | 0.02440 |    |
| 0303   | positive regulation of wound healing                             | 0      | 10     | 016     | 668     | 401     | 10 |
| GO:005 |                                                                  | 24/171 | 191/23 | 0.00721 | 0.03573 | 0.02440 |    |
| 0773   | regulation of dendrite development                               | 0      | 210    | 723     | 138     | 723     | 24 |
| GO:000 |                                                                  | 23/171 | 181/23 | 0.00736 | 0.03644 | 0.02489 |    |
| 9749   | response to glucose                                              | 0      | 210    | 861     | 997     | 808     | 23 |
| GO:005 |                                                                  | 38/171 | 342/23 | 0.00746 | 0.03689 | 0.02520 |    |
| 0878   | regulation of body fluid levels                                  | 0      | 210    | 463     | 369     | 117     | 38 |
| GO:000 | autophagy of mitochondrion                                       | 11/171 | 65/232 | 0.00749 | 0.03694 | 0.02523 | 11 |

|        |                                                                        |        |        |         |         |         |    |
|--------|------------------------------------------------------------------------|--------|--------|---------|---------|---------|----|
| 0422   |                                                                        | 0      | 10     | 405     | 534     | 645     |    |
| GO:006 |                                                                        | 11/171 | 65/232 | 0.00749 | 0.03694 | 0.02523 |    |
| 1726   | mitochondrion disassembly                                              | 0      | 10     | 405     | 534     | 645     | 11 |
| GO:009 |                                                                        | 11/171 | 65/232 | 0.00749 | 0.03694 | 0.02523 |    |
| 0559   | regulation of membrane permeability                                    | 0      | 10     | 405     | 534     | 645     | 11 |
| GO:001 |                                                                        | 17/171 | 121/23 | 0.00750 | 0.03695 | 0.02524 |    |
| 0906   | regulation of glucose metabolic process                                | 0      | 210    | 238     | 525     | 322     | 17 |
| GO:001 |                                                                        | 12/171 | 74/232 | 0.00756 | 0.03719 | 0.02540 |    |
| 0507   | negative regulation of autophagy                                       | 0      | 10     | 331     | 264     | 537     | 12 |
| GO:004 |                                                                        | 12/171 | 74/232 | 0.00756 | 0.03719 | 0.02540 |    |
| 5453   | bone resorption                                                        | 0      | 10     | 331     | 264     | 537     | 12 |
| GO:000 |                                                                        |        | 32/232 | 0.00763 | 0.03747 | 0.02559 |    |
| 7031   | peroxisome organization                                                | 7/1710 | 10     | 947     | 616     | 904     | 7  |
| GO:001 |                                                                        |        | 48/232 | 0.00764 | 0.03747 | 0.02559 |    |
| 0862   | positive regulation of pathway-restricted SMAD protein phosphorylation | 9/1710 | 10     | 663     | 616     | 904     | 9  |
| GO:003 |                                                                        |        | 48/232 | 0.00764 | 0.03747 | 0.02559 |    |
| 8066   | p38MAPK cascade                                                        | 9/1710 | 10     | 663     | 616     | 904     | 9  |
| GO:009 |                                                                        |        | 48/232 | 0.00764 | 0.03747 | 0.02559 |    |
| 0311   | regulation of protein deacetylation                                    | 9/1710 | 10     | 663     | 616     | 904     | 9  |
| GO:004 |                                                                        | 19/171 | 141/23 | 0.00766 | 0.03751 | 0.02562 |    |
| 5017   | glycerolipid biosynthetic process                                      | 0      | 210    | 126     | 644     | 655     | 19 |
| GO:004 |                                                                        | 15/171 | 102/23 | 0.00768 | 0.03757 | 0.02566 |    |
| 6849   | bone remodeling                                                        | 0      | 210    | 009     | 712     | 801     | 15 |
| GO:005 |                                                                        | 26/171 | 213/23 | 0.00773 | 0.03778 | 0.02581 |    |
| 0707   | regulation of cytokine secretion                                       | 0      | 210    | 638     | 924     | 29      | 26 |
| GO:005 | regulation of chemotaxis                                               | 26/171 | 213/23 | 0.00773 | 0.03778 | 0.02581 | 26 |

|        |                                                      |        |        |         |         |         |    |
|--------|------------------------------------------------------|--------|--------|---------|---------|---------|----|
| 0920   |                                                      | 0      | 210    | 638     | 924     | 29      |    |
| GO:001 |                                                      | 38/171 | 343/23 | 0.00781 | 0.03814 | 0.02605 |    |
| 8209   | peptidyl-serine modification                         | 0      | 210    | 607     | 659     | 7       | 38 |
| GO:000 |                                                      |        | 40/232 | 0.00785 | 0.03819 | 0.02608 |    |
| 9409   | response to cold                                     | 8/1710 | 10     | 166     | 265     | 846     | 8  |
| GO:001 |                                                      |        | 40/232 | 0.00785 | 0.03819 | 0.02608 |    |
| 0470   | regulation of gastrulation                           | 8/1710 | 10     | 166     | 265     | 846     | 8  |
| GO:004 |                                                      |        | 40/232 | 0.00785 | 0.03819 | 0.02608 |    |
| 6456   | icosanoid biosynthetic process                       | 8/1710 | 10     | 166     | 265     | 846     | 8  |
| GO:004 |                                                      |        | 40/232 | 0.00785 | 0.03819 | 0.02608 |    |
| 8741   | skeletal muscle fiber development                    | 8/1710 | 10     | 166     | 265     | 846     | 8  |
| GO:000 |                                                      | 14/171 | 93/232 | 0.00800 | 0.03892 | 0.02658 |    |
| 0045   | autophagosome assembly                               | 0      | 10     | 865     | 39      | 796     | 14 |
| GO:000 |                                                      | 41/171 | 377/23 | 0.00803 | 0.03903 | 0.02666 |    |
| 2237   | response to molecule of bacterial origin             | 0      | 210    | 841     | 607     | 458     | 41 |
| GO:003 |                                                      | 32/171 | 278/23 | 0.00811 | 0.03935 | 0.02687 |    |
| 0072   | peptide hormone secretion                            | 0      | 210    | 332     | 034     | 925     | 32 |
| GO:003 |                                                      | 28/171 | 235/23 | 0.00811 | 0.03935 | 0.02687 |    |
| 2886   | regulation of microtubule-based process              | 0      | 210    | 66      | 034     | 925     | 28 |
| GO:006 |                                                      | 17/171 | 122/23 | 0.00813 | 0.03938 | 0.02690 |    |
| 0996   | dendritic spine development                          | 0      | 210    | 539     | 815     | 507     | 17 |
| GO:000 |                                                      | 10/171 | 57/232 | 0.00818 | 0.03938 | 0.02690 |    |
| 3170   | heart valve development                              | 0      | 10     | 092     | 815     | 507     | 10 |
| GO:001 |                                                      | 10/171 | 57/232 | 0.00818 | 0.03938 | 0.02690 |    |
| 0463   | mesenchymal cell proliferation                       | 0      | 10     | 092     | 815     | 507     | 10 |
| GO:004 | positive regulation of receptor-mediated endocytosis | 10/171 | 57/232 | 0.00818 | 0.03938 | 0.02690 | 10 |

|        |                                                                                |        |        |         |         |         |    |
|--------|--------------------------------------------------------------------------------|--------|--------|---------|---------|---------|----|
| 8260   |                                                                                | 0      | 10     | 092     | 815     | 507     |    |
| GO:005 |                                                                                | 10/171 | 57/232 | 0.00818 | 0.03938 | 0.02690 |    |
| 0879   | multicellular organismal movement                                              | 0      | 10     | 092     | 815     | 507     | 10 |
| GO:005 |                                                                                | 10/171 | 57/232 | 0.00818 | 0.03938 | 0.02690 |    |
| 0881   | musculoskeletal movement                                                       | 0      | 10     | 092     | 815     | 507     | 10 |
| GO:005 |                                                                                | 10/171 | 57/232 | 0.00818 | 0.03938 | 0.02690 |    |
| 1893   | regulation of focal adhesion assembly                                          | 0      | 10     | 092     | 815     | 507     | 10 |
| GO:009 |                                                                                | 10/171 | 57/232 | 0.00818 | 0.03938 | 0.02690 |    |
| 0109   | regulation of cell-substrate junction assembly                                 | 0      | 10     | 092     | 815     | 507     | 10 |
| GO:000 |                                                                                | 24/171 | 193/23 | 0.00818 | 0.03938 | 0.02690 |    |
| 7249   | I-kappaB kinase/NF-kappaB signaling                                            | 0      | 210    | 508     | 815     | 507     | 24 |
| GO:003 |                                                                                |        | 18/232 | 0.00821 | 0.03943 | 0.02693 |    |
| 4389   | lipid droplet organization                                                     | 5/1710 | 10     | 556     | 739     | 871     | 5  |
| GO:003 | regulation of viral-induced cytoplasmic pattern recognition receptor signaling |        | 18/232 | 0.00821 | 0.03943 | 0.02693 |    |
| 9531   | pathway                                                                        | 5/1710 | 10     | 556     | 739     | 871     | 5  |
| GO:007 |                                                                                |        | 18/232 | 0.00821 | 0.03943 | 0.02693 |    |
| 0131   | positive regulation of mitochondrial translation                               | 5/1710 | 10     | 556     | 739     | 871     | 5  |
| GO:015 |                                                                                | 43/171 | 400/23 | 0.00823 | 0.03945 | 0.02695 |    |
| 0063   | visual system development                                                      | 0      | 210    | 851     | 597     | 14      | 43 |
| GO:005 |                                                                                | 29/171 | 246/23 | 0.00826 | 0.03945 | 0.02695 |    |
| 1348   | negative regulation of transferase activity                                    | 0      | 210    | 067     | 597     | 14      | 29 |
| GO:003 |                                                                                |        | 25/232 | 0.00830 | 0.03945 | 0.02695 |    |
| 2469   | endoplasmic reticulum calcium ion homeostasis                                  | 6/1710 | 10     | 723     | 597     | 14      | 6  |
| GO:005 |                                                                                |        | 25/232 | 0.00830 | 0.03945 | 0.02695 |    |
| 1443   | positive regulation of ubiquitin-protein transferase activity                  | 6/1710 | 10     | 723     | 597     | 14      | 6  |
| GO:006 | positive regulation of posttranscriptional gene silencing                      | 6/1710 | 25/232 | 0.00830 | 0.03945 | 0.02695 | 6  |



|        |                                                                                 |        |        |         |         |         |    |
|--------|---------------------------------------------------------------------------------|--------|--------|---------|---------|---------|----|
| 0148   |                                                                                 |        | 10     | 723     | 597     | 14      |    |
| GO:008 |                                                                                 |        | 25/232 | 0.00830 | 0.03945 | 0.02695 |    |
| 6019   | cell-cell signaling involved in cardiac conduction                              | 6/1710 | 10     | 723     | 597     | 14      | 6  |
| GO:009 |                                                                                 |        | 25/232 | 0.00830 | 0.03945 | 0.02695 |    |
| 0280   | positive regulation of calcium ion import                                       | 6/1710 | 10     | 723     | 597     | 14      | 6  |
| GO:015 |                                                                                 |        | 25/232 | 0.00830 | 0.03945 | 0.02695 |    |
| 0077   | regulation of neuroinflammatory response                                        | 6/1710 | 10     | 723     | 597     | 14      | 6  |
| GO:190 |                                                                                 |        | 25/232 | 0.00830 | 0.03945 | 0.02695 |    |
| 1739   | regulation of myoblast fusion                                                   | 6/1710 | 10     | 723     | 597     | 14      | 6  |
| GO:190 | negative regulation of intrinsic apoptotic signaling pathway in response to DNA |        | 25/232 | 0.00830 | 0.03945 | 0.02695 |    |
| 2230   | damage                                                                          | 6/1710 | 10     | 723     | 597     | 14      | 6  |
| GO:190 |                                                                                 |        | 25/232 | 0.00830 | 0.03945 | 0.02695 |    |
| 3649   | regulation of cytoplasmic transport                                             | 6/1710 | 10     | 723     | 597     | 14      | 6  |
| GO:200 |                                                                                 |        | 25/232 | 0.00830 | 0.03945 | 0.02695 |    |
| 0679   | positive regulation of transcription regulatory region DNA binding              | 6/1710 | 10     | 723     | 597     | 14      | 6  |
| GO:200 |                                                                                 |        | 25/232 | 0.00830 | 0.03945 | 0.02695 |    |
| 0737   | negative regulation of stem cell differentiation                                | 6/1710 | 10     | 723     | 597     | 14      | 6  |
| GO:000 |                                                                                 | 11/171 | 66/232 | 0.00840 | 0.03987 | 0.02723 |    |
| 2228   | natural killer cell mediated immunity                                           | 0      | 10     | 933     | 605     | 835     | 11 |
| GO:009 |                                                                                 | 11/171 | 66/232 | 0.00840 | 0.03987 | 0.02723 |    |
| 0278   | negative regulation of peptide hormone secretion                                | 0      | 10     | 933     | 605     | 835     | 11 |
| GO:004 |                                                                                 | 26/171 | 215/23 | 0.00870 | 0.04122 | 0.02816 |    |
| 5637   | regulation of myeloid cell differentiation                                      | 0      | 210    | 117     | 647     | 079     | 26 |
| GO:000 |                                                                                 | 29/171 | 247/23 | 0.00872 | 0.04128 | 0.02820 |    |
| 7568   | aging                                                                           | 0      | 210    | 036     | 391     | 002     | 29 |
| GO:001 | striated muscle adaptation                                                      | 9/1710 | 49/232 | 0.00876 | 0.04144 | 0.02831 | 9  |

|        |                                                            |        |         |         |         |         |
|--------|------------------------------------------------------------|--------|---------|---------|---------|---------|
| 4888   |                                                            | 10     | 932     | 851     | 246     |         |
| GO:190 |                                                            | 49/232 | 0.00876 | 0.04144 | 0.02831 |         |
| 4036   | negative regulation of epithelial cell apoptotic process   | 9/1710 | 10      | 932     | 851     | 246     |
| GO:004 |                                                            | 30/171 | 258/23  | 0.00883 | 0.04170 | 0.02848 |
| 5926   | negative regulation of growth                              | 0      | 210     | 131     | 779     | 956     |
| GO:001 |                                                            | 18/171 | 133/23  | 0.00887 | 0.04179 | 0.02854 |
| 8210   | peptidyl-threonine modification                            | 0      | 210     | 97      | 42      | 859     |
| GO:190 |                                                            | 18/171 | 133/23  | 0.00887 | 0.04179 | 0.02854 |
| 1568   | fatty acid derivative metabolic process                    | 0      | 210     | 97      | 42      | 859     |
| GO:000 |                                                            | 23/171 | 184/23  | 0.00893 | 0.04179 | 0.02854 |
| 9746   | response to hexose                                         | 0      | 210     | 437     | 42      | 859     |
| GO:005 |                                                            | 25/171 | 205/23  | 0.00898 | 0.04179 | 0.02854 |
| 0770   | regulation of axonogenesis                                 | 0      | 210     | 436     | 42      | 859     |
| GO:000 |                                                            |        | 12/232  | 0.00899 | 0.04179 | 0.02854 |
| 2016   | regulation of blood volume by renin-angiotensin            | 4/1710 | 10      | 269     | 42      | 859     |
| GO:000 |                                                            |        | 12/232  | 0.00899 | 0.04179 | 0.02854 |
| 3091   | renal water homeostasis                                    | 4/1710 | 10      | 269     | 42      | 859     |
| GO:000 |                                                            |        | 12/232  | 0.00899 | 0.04179 | 0.02854 |
| 3183   | mitral valve morphogenesis                                 | 4/1710 | 10      | 269     | 42      | 859     |
| GO:000 |                                                            |        | 12/232  | 0.00899 | 0.04179 | 0.02854 |
| 3264   | regulation of cardioblast proliferation                    | 4/1710 | 10      | 269     | 42      | 859     |
| GO:001 |                                                            |        | 12/232  | 0.00899 | 0.04179 | 0.02854 |
| 0889   | regulation of sequestering of triglyceride                 | 4/1710 | 10      | 269     | 42      | 859     |
| GO:001 |                                                            |        | 12/232  | 0.00899 | 0.04179 | 0.02854 |
| 4842   | regulation of skeletal muscle satellite cell proliferation | 4/1710 | 10      | 269     | 42      | 859     |
| GO:001 | glycine transport                                          | 4/1710 | 12/232  | 0.00899 | 0.04179 | 0.02854 |

|        |                                                                     |        |        |         |         |         |    |
|--------|---------------------------------------------------------------------|--------|--------|---------|---------|---------|----|
| 5816   |                                                                     |        | 10     | 269     | 42      | 859     |    |
| GO:003 |                                                                     |        | 12/232 | 0.00899 | 0.04179 | 0.02854 |    |
| 0836   | positive regulation of actin filament depolymerization              | 4/1710 | 10     | 269     | 42      | 859     | 4  |
| GO:004 |                                                                     |        | 12/232 | 0.00899 | 0.04179 | 0.02854 |    |
| 3649   | dicarboxylic acid catabolic process                                 | 4/1710 | 10     | 269     | 42      | 859     | 4  |
| GO:006 |                                                                     |        | 12/232 | 0.00899 | 0.04179 | 0.02854 |    |
| 1450   | trophoblast cell migration                                          | 4/1710 | 10     | 269     | 42      | 859     | 4  |
| GO:007 |                                                                     |        | 12/232 | 0.00899 | 0.04179 | 0.02854 |    |
| 0202   | regulation of establishment of protein localization to chromosome   | 4/1710 | 10     | 269     | 42      | 859     | 4  |
| GO:008 |                                                                     |        | 12/232 | 0.00899 | 0.04179 | 0.02854 |    |
| 6013   | membrane repolarization during cardiac muscle cell action potential | 4/1710 | 10     | 269     | 42      | 859     | 4  |
| GO:009 |                                                                     |        | 12/232 | 0.00899 | 0.04179 | 0.02854 |    |
| 7428   | protein maturation by iron-sulfur cluster transfer                  | 4/1710 | 10     | 269     | 42      | 859     | 4  |
| GO:190 |                                                                     |        | 12/232 | 0.00899 | 0.04179 | 0.02854 |    |
| 2946   | protein localization to early endosome                              | 4/1710 | 10     | 269     | 42      | 859     | 4  |
| GO:190 |                                                                     |        | 12/232 | 0.00899 | 0.04179 | 0.02854 |    |
| 5668   | positive regulation of protein localization to endosome             | 4/1710 | 10     | 269     | 42      | 859     | 4  |
| GO:200 |                                                                     |        | 12/232 | 0.00899 | 0.04179 | 0.02854 |    |
| 0674   | regulation of type B pancreatic cell apoptotic process              | 4/1710 | 10     | 269     | 42      | 859     | 4  |
| GO:004 |                                                                     |        | 33/232 | 0.00909 | 0.04210 | 0.02876 |    |
| 5047   | protein targeting to ER                                             | 7/1710 | 10     | 255     | 778     | 278     | 7  |
| GO:006 |                                                                     |        | 33/232 | 0.00909 | 0.04210 | 0.02876 |    |
| 0740   | prostate gland epithelium morphogenesis                             | 7/1710 | 10     | 255     | 778     | 278     | 7  |
| GO:008 |                                                                     |        | 33/232 | 0.00909 | 0.04210 | 0.02876 |    |
| 6091   | regulation of heart rate by cardiac conduction                      | 7/1710 | 10     | 255     | 778     | 278     | 7  |
| GO:000 | lens development in camera-type eye                                 | 13/171 | 85/232 | 0.00911 | 0.04210 | 0.02876 | 13 |

|        |                                                         |        |        |         |         |         |    |
|--------|---------------------------------------------------------|--------|--------|---------|---------|---------|----|
| 2088   |                                                         | 0      | 10     | 824     | 778     | 278     |    |
| GO:000 |                                                         | 22/171 | 174/23 | 0.00913 | 0.04210 | 0.02876 |    |
| 6575   | cellular modified amino acid metabolic process          | 0      | 210    | 877     | 778     | 278     | 22 |
| GO:000 |                                                         |        | 41/232 | 0.00913 | 0.04210 | 0.02876 |    |
| 3298   | physiological muscle hypertrophy                        | 8/1710 | 10     | 945     | 778     | 278     | 8  |
| GO:000 |                                                         |        | 41/232 | 0.00913 | 0.04210 | 0.02876 |    |
| 3301   | physiological cardiac muscle hypertrophy                | 8/1710 | 10     | 945     | 778     | 278     | 8  |
| GO:000 |                                                         |        | 41/232 | 0.00913 | 0.04210 | 0.02876 |    |
| 9066   | aspartate family amino acid metabolic process           | 8/1710 | 10     | 945     | 778     | 278     | 8  |
| GO:006 |                                                         |        | 41/232 | 0.00913 | 0.04210 | 0.02876 |    |
| 1049   | cell growth involved in cardiac muscle cell development | 8/1710 | 10     | 945     | 778     | 278     | 8  |
| GO:190 |                                                         |        | 41/232 | 0.00913 | 0.04210 | 0.02876 |    |
| 0744   | regulation of p38MAPK cascade                           | 8/1710 | 10     | 945     | 778     | 278     | 8  |
| GO:190 |                                                         |        | 41/232 | 0.00913 | 0.04210 | 0.02876 |    |
| 5521   | regulation of macrophage migration                      | 8/1710 | 10     | 945     | 778     | 278     | 8  |
| GO:006 |                                                         | 15/171 | 104/23 | 0.00915 | 0.04216 | 0.02880 |    |
| 1326   | renal tubule development                                | 0      | 210    | 899     | 457     | 158     | 15 |
| GO:000 |                                                         | 26/171 | 216/23 | 0.00921 | 0.04240 | 0.02896 |    |
| 7163   | establishment or maintenance of cell polarity           | 0      | 210    | 925     | 854     | 823     | 26 |
| GO:000 |                                                         | 24/171 | 195/23 | 0.00925 | 0.04251 | 0.02903 |    |
| 3205   | cardiac chamber development                             | 0      | 210    | 646     | 275     | 941     | 24 |
| GO:003 |                                                         | 24/171 | 195/23 | 0.00925 | 0.04251 | 0.02903 |    |
| 0307   | positive regulation of cell growth                      | 0      | 210    | 646     | 275     | 941     | 24 |
| GO:190 |                                                         | 30/171 | 259/23 | 0.00930 | 0.04270 | 0.02917 |    |
| 1990   | regulation of mitotic cell cycle phase transition       | 0      | 210    | 551     | 446     | 036     | 30 |
| GO:004 | sensory system development                              | 43/171 | 403/23 | 0.00933 | 0.04278 | 0.02922 | 43 |

|        |                                                      |        |        |         |         |         |    |
|--------|------------------------------------------------------|--------|--------|---------|---------|---------|----|
| 8880   |                                                      | 0      | 210    | 092     | 746     | 706     |    |
| GO:000 |                                                      | 11/171 | 67/232 | 0.00940 | 0.04303 | 0.02939 |    |
| 6801   | superoxide metabolic process                         | 0      | 10     | 886     | 896     | 886     | 11 |
| GO:004 |                                                      | 11/171 | 67/232 | 0.00940 | 0.04303 | 0.02939 |    |
| 3113   | receptor clustering                                  | 0      | 10     | 886     | 896     | 886     | 11 |
| GO:006 |                                                      | 11/171 | 67/232 | 0.00940 | 0.04303 | 0.02939 |    |
| 0688   | regulation of morphogenesis of a branching structure | 0      | 10     | 886     | 896     | 886     | 11 |
| GO:003 |                                                      | 27/171 | 227/23 | 0.00941 | 0.04303 | 0.02939 |    |
| 2944   | regulation of mononuclear cell proliferation         | 0      | 210    | 523     | 896     | 886     | 27 |
| GO:004 |                                                      | 36/171 | 325/23 | 0.00945 | 0.04316 | 0.02948 |    |
| 6486   | glycerolipid metabolic process                       | 0      | 210    | 116     | 943     | 797     | 36 |
| GO:003 |                                                      | 23/171 | 185/23 | 0.00951 | 0.04338 | 0.02963 |    |
| 4284   | response to monosaccharide                           | 0      | 210    | 268     | 257     | 357     | 23 |
| GO:005 |                                                      | 23/171 | 185/23 | 0.00951 | 0.04338 | 0.02963 |    |
| 0796   | regulation of insulin secretion                      | 0      | 210    | 268     | 257     | 357     | 23 |
| GO:000 |                                                      | 28/171 | 238/23 | 0.00957 | 0.04360 | 0.02978 |    |
| 6401   | RNA catabolic process                                | 0      | 210    | 545     | 075     | 26      | 28 |
| GO:007 |                                                      | 28/171 | 238/23 | 0.00957 | 0.04360 | 0.02978 |    |
| 0663   | regulation of leukocyte proliferation                | 0      | 210    | 545     | 075     | 26      | 28 |
| GO:004 |                                                      | 22/171 | 175/23 | 0.00974 | 0.04434 | 0.03029 |    |
| 3902   | positive regulation of multi-organism process        | 0      | 210    | 725     | 847     | 335     | 22 |
| GO:001 |                                                      | 45/171 | 427/23 | 0.00985 | 0.04478 | 0.03059 |    |
| 9932   | second-messenger-mediated signaling                  | 0      | 210    | 042     | 299     | 015     | 45 |
| GO:001 |                                                      | 15/171 | 105/23 | 0.00997 | 0.04525 | 0.03091 |    |
| 6241   | regulation of macroautophagy                         | 0      | 210    | 845     | 942     | 559     | 15 |
| GO:003 | segmentation                                         | 15/171 | 105/23 | 0.00997 | 0.04525 | 0.03091 | 15 |

|        |                                                   |        |        |         |         |         |    |
|--------|---------------------------------------------------|--------|--------|---------|---------|---------|----|
| 5282   |                                                   | 0      | 210    | 845     | 942     | 559     |    |
| GO:005 |                                                   | 15/171 | 105/23 | 0.00997 | 0.04525 | 0.03091 |    |
| 5017   | cardiac muscle tissue growth                      | 0      | 210    | 845     | 942     | 559     | 15 |
| GO:001 |                                                   |        | 50/232 | 0.01001 | 0.04534 | 0.03097 |    |
| 0596   | negative regulation of endothelial cell migration | 9/1710 | 10     | 253     | 358     | 308     | 9  |
| GO:003 |                                                   |        | 50/232 | 0.01001 | 0.04534 | 0.03097 |    |
| 1663   | lipopolysaccharide-mediated signaling pathway     | 9/1710 | 10     | 253     | 358     | 308     | 9  |
| GO:006 |                                                   | 13/171 | 86/232 | 0.01003 | 0.04542 | 0.03102 |    |
| 1333   | renal tubule morphogenesis                        | 0      | 10     | 766     | 217     | 676     | 13 |
| GO:002 |                                                   | 46/171 | 439/23 | 0.01009 | 0.04563 | 0.03117 |    |
| 2613   | ribonucleoprotein complex biogenesis              | 0      | 210    | 207     | 302     | 079     | 46 |
| GO:005 |                                                   |        | 26/232 | 0.01013 | 0.04574 | 0.03124 |    |
| 1125   | regulation of actin nucleation                    | 6/1710 | 10     | 939     | 077     | 439     | 6  |
| GO:007 |                                                   |        | 26/232 | 0.01013 | 0.04574 | 0.03124 |    |
| 0129   | regulation of mitochondrial translation           | 6/1710 | 10     | 939     | 077     | 439     | 6  |
| GO:007 |                                                   |        | 26/232 | 0.01013 | 0.04574 | 0.03124 |    |
| 1549   | cellular response to dexamethasone stimulus       | 6/1710 | 10     | 939     | 077     | 439     | 6  |
| GO:190 |                                                   | 19/171 | 145/23 | 0.01024 | 0.04617 | 0.03154 |    |
| 5952   | regulation of lipid localization                  | 0      | 210    | 382     | 622     | 184     | 19 |
| GO:005 |                                                   | 30/171 | 261/23 | 0.01031 | 0.04646 | 0.03174 |    |
| 1048   | negative regulation of secretion                  | 0      | 210    | 665     | 869     | 162     | 30 |
| GO:006 |                                                   | 12/171 | 77/232 | 0.01034 | 0.04656 | 0.03180 |    |
| 1180   | mammary gland epithelium development              | 0      | 10     | 504     | 064     | 442     | 12 |
| GO:000 |                                                   | 22/171 | 176/23 | 0.01038 | 0.04668 | 0.03188 |    |
| 2262   | myeloid cell homeostasis                          | 0      | 210    | 804     | 223     | 748     | 22 |
| GO:000 | response to mechanical stimulus                   | 22/171 | 176/23 | 0.01038 | 0.04668 | 0.03188 | 22 |

|        |                                                                                 |        |        |         |         |         |    |
|--------|---------------------------------------------------------------------------------|--------|--------|---------|---------|---------|----|
| 9612   |                                                                                 | 0      | 210    | 804     | 223     | 748     |    |
| GO:000 |                                                                                 | 10/171 | 59/232 | 0.01042 | 0.04672 | 0.03191 |    |
| 6749   | glutathione metabolic process                                                   | 0      | 10     | 053     | 063     | 371     | 10 |
| GO:190 |                                                                                 | 10/171 | 59/232 | 0.01042 | 0.04672 | 0.03191 |    |
| 3078   | positive regulation of protein localization to plasma membrane                  | 0      | 10     | 053     | 063     | 371     | 10 |
| GO:000 |                                                                                 |        | 19/232 | 0.01048 | 0.04672 | 0.03191 |    |
| 9435   | NAD biosynthetic process                                                        | 5/1710 | 10     | 455     | 063     | 371     | 5  |
| GO:001 |                                                                                 |        | 19/232 | 0.01048 | 0.04672 | 0.03191 |    |
| 0544   | negative regulation of platelet activation                                      | 5/1710 | 10     | 455     | 063     | 371     | 5  |
| GO:003 |                                                                                 |        | 19/232 | 0.01048 | 0.04672 | 0.03191 |    |
| 1571   | mitotic G1 DNA damage checkpoint                                                | 5/1710 | 10     | 455     | 063     | 371     | 5  |
| GO:004 |                                                                                 |        | 19/232 | 0.01048 | 0.04672 | 0.03191 |    |
| 4794   | positive regulation by host of viral process                                    | 5/1710 | 10     | 455     | 063     | 371     | 5  |
| GO:004 |                                                                                 |        | 19/232 | 0.01048 | 0.04672 | 0.03191 |    |
| 5953   | negative regulation of natural killer cell mediated cytotoxicity                | 5/1710 | 10     | 455     | 063     | 371     | 5  |
| GO:004 |                                                                                 |        | 19/232 | 0.01048 | 0.04672 | 0.03191 |    |
| 6886   | positive regulation of hormone biosynthetic process                             | 5/1710 | 10     | 455     | 063     | 371     | 5  |
| GO:006 | positive regulation of myeloid leukocyte cytokine production involved in immune |        | 19/232 | 0.01048 | 0.04672 | 0.03191 |    |
| 1081   | response                                                                        | 5/1710 | 10     | 455     | 063     | 371     | 5  |
| GO:190 |                                                                                 |        | 19/232 | 0.01048 | 0.04672 | 0.03191 |    |
| 4385   | cellular response to angiotensin                                                | 5/1710 | 10     | 455     | 063     | 371     | 5  |
| GO:200 |                                                                                 |        | 19/232 | 0.01048 | 0.04672 | 0.03191 |    |
| 0251   | positive regulation of actin cytoskeleton reorganization                        | 5/1710 | 10     | 455     | 063     | 371     | 5  |
| GO:004 |                                                                                 | 11/171 | 68/232 | 0.01049 | 0.04674 | 0.03192 |    |
| 8002   | antigen processing and presentation of peptide antigen                          | 0      | 10     | 75      | 27      | 878     | 11 |
| GO:007 | cellular response to hypoxia                                                    | 14/171 | 96/232 | 0.01053 | 0.04685 | 0.03200 | 14 |

|        |                                                             |        |        |         |         |         |    |
|--------|-------------------------------------------------------------|--------|--------|---------|---------|---------|----|
| 1456   |                                                             | 0      | 10     | 089     | 564     | 593     |    |
| GO:001 |                                                             |        | 42/232 | 0.01057 | 0.04695 | 0.03207 |    |
| 0883   | regulation of lipid storage                                 | 8/1710 | 10     | 83      | 928     | 673     | 8  |
| GO:004 |                                                             |        | 42/232 | 0.01057 | 0.04695 | 0.03207 |    |
| 5923   | positive regulation of fatty acid metabolic process         | 8/1710 | 10     | 83      | 928     | 673     | 8  |
| GO:009 |                                                             |        | 42/232 | 0.01057 | 0.04695 | 0.03207 |    |
| 8927   | vesicle-mediated transport between endosomal compartments   | 8/1710 | 10     | 83      | 928     | 673     | 8  |
| GO:004 |                                                             | 21/171 | 166/23 | 0.01062 | 0.04714 | 0.03220 |    |
| 2594   | response to starvation                                      | 0      | 210    | 753     | 203     | 156     | 21 |
| GO:002 |                                                             | 42/171 | 395/23 | 0.01068 | 0.04733 | 0.03233 |    |
| 2407   | regulation of cell-cell adhesion                            | 0      | 210    | 001     | 884     | 6       | 42 |
| GO:000 |                                                             |        | 34/232 | 0.01073 | 0.04748 | 0.03243 |    |
| 6984   | ER-nucleus signaling pathway                                | 7/1710 | 10     | 804     | 799     | 788     | 7  |
| GO:003 |                                                             |        | 34/232 | 0.01073 | 0.04748 | 0.03243 |    |
| 3032   | regulation of myeloid cell apoptotic process                | 7/1710 | 10     | 804     | 799     | 788     | 7  |
| GO:006 |                                                             |        | 34/232 | 0.01073 | 0.04748 | 0.03243 |    |
| 0512   | prostate gland morphogenesis                                | 7/1710 | 10     | 804     | 799     | 788     | 7  |
| GO:005 |                                                             | 23/171 | 187/23 | 0.01076 | 0.04755 | 0.03248 |    |
| 0870   | positive regulation of T cell activation                    | 0      | 210    | 027     | 03      | 044     | 23 |
| GO:004 |                                                             | 33/171 | 295/23 | 0.01093 | 0.04829 | 0.03299 |    |
| 3087   | regulation of GTPase activity                               | 0      | 210    | 735     | 63      | 001     | 33 |
| GO:190 |                                                             | 13/171 | 87/232 | 0.01102 | 0.04862 | 0.03321 |    |
| 1879   | regulation of protein depolymerization                      | 0      | 10     | 776     | 202     | 251     | 13 |
| GO:200 |                                                             | 13/171 | 87/232 | 0.01102 | 0.04862 | 0.03321 |    |
| 0117   | negative regulation of cysteine-type endopeptidase activity | 0      | 10     | 776     | 202     | 251     | 13 |
| GO:009 | import across plasma membrane                               | 16/171 | 116/23 | 0.01103 | 0.04863 | 0.03321 | 16 |



|        |                                                       |        |        |         |         |         |    |
|--------|-------------------------------------------------------|--------|--------|---------|---------|---------|----|
| 8739   |                                                       | 0      | 210    | 846     | 248     | 965     |    |
| GO:200 |                                                       | 25/171 | 209/23 | 0.01133 | 0.04987 | 0.03406 |    |
| 1020   | regulation of response to DNA damage stimulus         | 0      | 210    | 615     | 722     | 99      | 25 |
| GO:000 |                                                       | 21/171 | 167/23 | 0.01133 | 0.04987 | 0.03406 |    |
| 6399   | tRNA metabolic process                                | 0      | 210    | 806     | 722     | 99      | 21 |
| GO:004 |                                                       |        | 51/232 | 0.01138 | 0.04996 | 0.03413 |    |
| 5912   | negative regulation of carbohydrate metabolic process | 9/1710 | 10     | 385     | 577     | 039     | 9  |
| GO:005 |                                                       |        | 51/232 | 0.01138 | 0.04996 | 0.03413 |    |
| 1954   | positive regulation of amine transport                | 9/1710 | 10     | 385     | 577     | 039     | 9  |
| GO:007 |                                                       |        | 51/232 | 0.01138 | 0.04996 | 0.03413 |    |
| 0542   | response to fatty acid                                | 9/1710 | 10     | 385     | 577     | 039     | 9  |
| GO:007 |                                                       | 32/171 | 285/23 | 0.01147 | 0.05032 | 0.03437 |    |
| 1496   | cellular response to external stimulus                | 0      | 210    | 386     | 305     | 444     | 32 |
| GO:007 |                                                       | 14/171 | 97/232 | 0.01149 | 0.05034 | 0.03439 |    |
| 2676   | lymphocyte migration                                  | 0      | 10     | 711     | 941     | 244     | 14 |
| GO:190 |                                                       | 14/171 | 97/232 | 0.01149 | 0.05034 | 0.03439 |    |
| 5037   | autophagosome organization                            | 0      | 10     | 711     | 941     | 244     | 14 |
| GO:003 |                                                       | 20/171 | 157/23 | 0.01157 | 0.05063 | 0.03458 |    |
| 3135   | regulation of peptidyl-serine phosphorylation         | 0      | 210    | 871     | 695     | 886     | 20 |
| GO:000 |                                                       | 42/171 | 397/23 | 0.01158 | 0.05063 | 0.03458 |    |
| 1654   | eye development                                       | 0      | 210    | 01      | 695     | 886     | 42 |
| GO:004 |                                                       | 10/171 | 60/232 | 0.01170 | 0.05109 | 0.03489 |    |
| 5824   | negative regulation of innate immune response         | 0      | 10     | 137     | 073     | 882     | 10 |
| GO:006 |                                                       | 10/171 | 60/232 | 0.01170 | 0.05109 | 0.03489 |    |
| 0324   | face development                                      | 0      | 10     | 137     | 073     | 882     | 10 |
| GO:007 | regulation of microtubule cytoskeleton organization   | 24/171 | 199/23 | 0.01174 | 0.05122 | 0.03499 | 24 |

|        |                                                              |        |        |         |         |         |    |
|--------|--------------------------------------------------------------|--------|--------|---------|---------|---------|----|
| 0507   |                                                              | 0      | 210    | 114     | 61      | 129     |    |
| GO:004 |                                                              | 22/171 | 178/23 | 0.01177 | 0.05131 | 0.03505 |    |
| 3524   | negative regulation of neuron apoptotic process              | 0      | 210    | 13      | 934     | 498     | 22 |
| GO:000 |                                                              | 15/171 | 107/23 | 0.01179 | 0.05136 | 0.03508 |    |
| 1823   | mesonephros development                                      | 0      | 210    | 006     | 28      | 466     | 15 |
| GO:001 |                                                              | 17/171 | 127/23 | 0.01197 | 0.05207 | 0.03557 |    |
| 0565   | regulation of cellular ketone metabolic process              | 0      | 210    | 109     | 381     | 034     | 17 |
| GO:001 |                                                              | 17/171 | 127/23 | 0.01197 | 0.05207 | 0.03557 |    |
| 0811   | positive regulation of cell-substrate adhesion               | 0      | 210    | 109     | 381     | 034     | 17 |
| GO:003 |                                                              | 13/171 | 88/232 | 0.01209 | 0.05227 | 0.03571 |    |
| 1110   | regulation of microtubule polymerization or depolymerization | 0      | 10     | 199     | 885     | 04      | 13 |
| GO:004 |                                                              |        | 43/232 | 0.01217 | 0.05227 | 0.03571 |    |
| 3403   | skeletal muscle tissue regeneration                          | 8/1710 | 10     | 807     | 885     | 04      | 8  |
| GO:000 |                                                              |        | 27/232 | 0.01224 | 0.05227 | 0.03571 |    |
| 3171   | atrioventricular valve development                           | 6/1710 | 10     | 105     | 885     | 04      | 6  |
| GO:001 |                                                              |        | 27/232 | 0.01224 | 0.05227 | 0.03571 |    |
| 0893   | positive regulation of steroid biosynthetic process          | 6/1710 | 10     | 105     | 885     | 04      | 6  |
| GO:001 |                                                              |        | 27/232 | 0.01224 | 0.05227 | 0.03571 |    |
| 6577   | histone demethylation                                        | 6/1710 | 10     | 105     | 885     | 04      | 6  |
| GO:004 |                                                              |        | 27/232 | 0.01224 | 0.05227 | 0.03571 |    |
| 4342   | type B pancreatic cell proliferation                         | 6/1710 | 10     | 105     | 885     | 04      | 6  |
| GO:007 |                                                              |        | 27/232 | 0.01224 | 0.05227 | 0.03571 |    |
| 0076   | histone lysine demethylation                                 | 6/1710 | 10     | 105     | 885     | 04      | 6  |
| GO:000 |                                                              |        | 13/232 | 0.01224 | 0.05227 | 0.03571 |    |
| 1553   | luteinization                                                | 4/1710 | 10     | 195     | 885     | 04      | 4  |
| GO:000 | mitral valve development                                     | 4/1710 | 13/232 | 0.01224 | 0.05227 | 0.03571 | 4  |

|        |                                                              |        |        |         |         |         |   |
|--------|--------------------------------------------------------------|--------|--------|---------|---------|---------|---|
| 3174   |                                                              |        | 10     | 195     | 885     | 04      |   |
| GO:000 |                                                              |        | 13/232 | 0.01224 | 0.05227 | 0.03571 |   |
| 6983   | ER overload response                                         | 4/1710 | 10     | 195     | 885     | 04      | 4 |
| GO:000 |                                                              |        | 13/232 | 0.01224 | 0.05227 | 0.03571 |   |
| 7614   | short-term memory                                            | 4/1710 | 10     | 195     | 885     | 04      | 4 |
| GO:001 |                                                              |        | 13/232 | 0.01224 | 0.05227 | 0.03571 |   |
| 4841   | skeletal muscle satellite cell proliferation                 | 4/1710 | 10     | 195     | 885     | 04      | 4 |
| GO:002 |                                                              |        | 13/232 | 0.01224 | 0.05227 | 0.03571 |   |
| 1683   | cerebellar granular layer morphogenesis                      | 4/1710 | 10     | 195     | 885     | 04      | 4 |
| GO:003 |                                                              |        | 13/232 | 0.01224 | 0.05227 | 0.03571 |   |
| 0240   | skeletal muscle thin filament assembly                       | 4/1710 | 10     | 195     | 885     | 04      | 4 |
| GO:003 |                                                              |        | 13/232 | 0.01224 | 0.05227 | 0.03571 |   |
| 2060   | bleb assembly                                                | 4/1710 | 10     | 195     | 885     | 04      | 4 |
| GO:004 |                                                              |        | 13/232 | 0.01224 | 0.05227 | 0.03571 |   |
| 2983   | amyloid precursor protein biosynthetic process               | 4/1710 | 10     | 195     | 885     | 04      | 4 |
| GO:004 |                                                              |        | 13/232 | 0.01224 | 0.05227 | 0.03571 |   |
| 2984   | regulation of amyloid precursor protein biosynthetic process | 4/1710 | 10     | 195     | 885     | 04      | 4 |
| GO:004 |                                                              |        | 13/232 | 0.01224 | 0.05227 | 0.03571 |   |
| 5136   | development of secondary sexual characteristics              | 4/1710 | 10     | 195     | 885     | 04      | 4 |
| GO:004 |                                                              |        | 13/232 | 0.01224 | 0.05227 | 0.03571 |   |
| 5820   | negative regulation of glycolytic process                    | 4/1710 | 10     | 195     | 885     | 04      | 4 |
| GO:004 |                                                              |        | 13/232 | 0.01224 | 0.05227 | 0.03571 |   |
| 8742   | regulation of skeletal muscle fiber development              | 4/1710 | 10     | 195     | 885     | 04      | 4 |
| GO:006 |                                                              |        | 13/232 | 0.01224 | 0.05227 | 0.03571 |   |
| 0452   | positive regulation of cardiac muscle contraction            | 4/1710 | 10     | 195     | 885     | 04      | 4 |
| GO:190 | regulation of neuromuscular junction development             | 4/1710 | 13/232 | 0.01224 | 0.05227 | 0.03571 | 4 |

|        |                                                                             |        |        |         |         |         |    |
|--------|-----------------------------------------------------------------------------|--------|--------|---------|---------|---------|----|
| 4396   |                                                                             |        | 10     | 195     | 885     | 04      |    |
| GO:190 |                                                                             |        | 13/232 | 0.01224 | 0.05227 | 0.03571 |    |
| 4816   | positive regulation of protein localization to chromosome, telomeric region | 4/1710 | 10     | 195     | 885     | 04      | 4  |
| GO:190 |                                                                             |        | 13/232 | 0.01224 | 0.05227 | 0.03571 |    |
| 5048   | regulation of metalloproteinase activity                                    | 4/1710 | 10     | 195     | 885     | 04      | 4  |
| GO:190 |                                                                             |        | 13/232 | 0.01224 | 0.05227 | 0.03571 |    |
| 5666   | regulation of protein localization to endosome                              | 4/1710 | 10     | 195     | 885     | 04      | 4  |
| GO:000 |                                                                             | 27/171 | 232/23 | 0.01235 | 0.05274 | 0.03602 |    |
| 1894   | tissue homeostasis                                                          | 0      | 210    | 984     | 375     | 795     | 27 |
| GO:004 |                                                                             | 14/171 | 98/232 | 0.01253 | 0.05340 | 0.03648 |    |
| 2102   | positive regulation of T cell proliferation                                 | 0      | 10     | 099     | 896     | 234     | 14 |
| GO:004 |                                                                             | 39/171 | 365/23 | 0.01253 | 0.05340 | 0.03648 |    |
| 6879   | hormone secretion                                                           | 0      | 210    | 401     | 896     | 234     | 39 |
| GO:003 |                                                                             |        | 35/232 | 0.01258 | 0.05341 | 0.03648 |    |
| 4122   | negative regulation of toll-like receptor signaling pathway                 | 7/1710 | 10     | 932     | 422     | 594     | 7  |
| GO:004 |                                                                             |        | 35/232 | 0.01258 | 0.05341 | 0.03648 |    |
| 8147   | negative regulation of fibroblast proliferation                             | 7/1710 | 10     | 932     | 422     | 594     | 7  |
| GO:004 |                                                                             |        | 35/232 | 0.01258 | 0.05341 | 0.03648 |    |
| 8710   | regulation of astrocyte differentiation                                     | 7/1710 | 10     | 932     | 422     | 594     | 7  |
| GO:190 |                                                                             |        | 35/232 | 0.01258 | 0.05341 | 0.03648 |    |
| 2895   | positive regulation of pri-miRNA transcription by RNA polymerase II         | 7/1710 | 10     | 932     | 422     | 594     | 7  |
| GO:003 |                                                                             | 12/171 | 79/232 | 0.01259 | 0.05341 | 0.03648 |    |
| 8034   | signal transduction in absence of ligand                                    | 0      | 10     | 925     | 422     | 594     | 12 |
| GO:005 |                                                                             | 12/171 | 79/232 | 0.01259 | 0.05341 | 0.03648 |    |
| 1702   | interaction with symbiont                                                   | 0      | 10     | 925     | 422     | 594     | 12 |
| GO:009 | extrinsic apoptotic signaling pathway in absence of ligand                  | 12/171 | 79/232 | 0.01259 | 0.05341 | 0.03648 | 12 |

|        |                                                                  |        |        |         |         |         |    |
|--------|------------------------------------------------------------------|--------|--------|---------|---------|---------|----|
| 7192   |                                                                  | 0      | 10     | 925     | 422     | 594     |    |
| GO:190 |                                                                  | 32/171 | 287/23 | 0.01261 | 0.05345 | 0.03651 |    |
| 3037   | regulation of leukocyte cell-cell adhesion                       | 0      | 210    | 914     | 977     | 705     | 32 |
| GO:003 |                                                                  | 18/171 | 138/23 | 0.01278 | 0.05409 | 0.03695 |    |
| 2946   | positive regulation of mononuclear cell proliferation            | 0      | 210    | 208     | 391     | 022     | 18 |
| GO:005 |                                                                  | 15/171 | 108/23 | 0.01278 | 0.05409 | 0.03695 |    |
| 1028   | mRNA transport                                                   | 0      | 210    | 735     | 391     | 022     | 15 |
| GO:004 |                                                                  | 23/171 | 190/23 | 0.01287 | 0.05435 | 0.03712 |    |
| 4706   | multi-multicellular organism process                             | 0      | 210    | 56      | 671     | 973     | 23 |
| GO:004 |                                                                  |        | 52/232 | 0.01289 | 0.05435 | 0.03712 |    |
| 6148   | pigment biosynthetic process                                     | 9/1710 | 10     | 083     | 671     | 973     | 9  |
| GO:190 |                                                                  |        | 52/232 | 0.01289 | 0.05435 | 0.03712 |    |
| 0271   | regulation of long-term synaptic potentiation                    | 9/1710 | 10     | 083     | 671     | 973     | 9  |
| GO:006 |                                                                  | 16/171 | 118/23 | 0.01289 | 0.05435 | 0.03712 |    |
| 0349   | bone morphogenesis                                               | 0      | 210    | 6       | 671     | 973     | 16 |
| GO:006 |                                                                  | 16/171 | 118/23 | 0.01289 | 0.05435 | 0.03712 |    |
| 0759   | regulation of response to cytokine stimulus                      | 0      | 210    | 6       | 671     | 973     | 16 |
| GO:190 |                                                                  | 11/171 | 70/232 | 0.01296 | 0.05451 | 0.03723 |    |
| 1796   | regulation of signal transduction by p53 class mediator          | 0      | 10     | 167     | 553     | 822     | 11 |
| GO:199 |                                                                  | 11/171 | 70/232 | 0.01296 | 0.05451 | 0.03723 |    |
| 0868   | response to chemokine                                            | 0      | 10     | 167     | 553     | 822     | 11 |
| GO:199 |                                                                  | 11/171 | 70/232 | 0.01296 | 0.05451 | 0.03723 |    |
| 0869   | cellular response to chemokine                                   | 0      | 10     | 167     | 553     | 822     | 11 |
| GO:005 |                                                                  | 28/171 | 244/23 | 0.01313 | 0.05482 | 0.03744 |    |
| 0663   | cytokine secretion                                               | 0      | 210    | 657     | 267     | 802     | 28 |
| GO:005 | positive regulation of DNA-binding transcription factor activity | 28/171 | 244/23 | 0.01313 | 0.05482 | 0.03744 | 28 |

|        |                                                              |        |        |         |         |         |         |
|--------|--------------------------------------------------------------|--------|--------|---------|---------|---------|---------|
| 1091   |                                                              | 0      | 210    | 657     | 267     | 802     |         |
| GO:000 |                                                              |        | 20/232 | 0.01314 | 0.05482 | 0.03744 |         |
| 1946   | lymphangiogenesis                                            | 5/1710 | 10     | 731     | 267     | 802     | 5       |
| GO:000 |                                                              |        | 20/232 | 0.01314 | 0.05482 | 0.03744 |         |
| 2716   | negative regulation of natural killer cell mediated immunity | 5/1710 | 10     | 731     | 267     | 802     | 5       |
| GO:003 |                                                              |        | 20/232 | 0.01314 | 0.05482 | 0.03744 |         |
| 2148   | activation of protein kinase B activity                      | 5/1710 | 10     | 731     | 267     | 802     | 5       |
| GO:004 |                                                              |        | 20/232 | 0.01314 | 0.05482 | 0.03744 |         |
| 4783   | G1 DNA damage checkpoint                                     | 5/1710 | 10     | 731     | 267     | 802     | 5       |
| GO:004 |                                                              |        | 20/232 | 0.01314 | 0.05482 | 0.03744 |         |
| 4819   | mitotic G1/S transition checkpoint                           | 5/1710 | 10     | 731     | 267     | 802     | 5       |
| GO:004 |                                                              |        | 20/232 | 0.01314 | 0.05482 | 0.03744 |         |
| 5649   | regulation of macrophage differentiation                     | 5/1710 | 10     | 731     | 267     | 802     | 5       |
| GO:004 |                                                              |        | 20/232 | 0.01314 | 0.05482 | 0.03744 |         |
| 8143   | astrocyte activation                                         | 5/1710 | 10     | 731     | 267     | 802     | 5       |
| GO:007 |                                                              |        | 20/232 | 0.01314 | 0.05482 | 0.03744 |         |
| 1157   | negative regulation of cell cycle arrest                     | 5/1710 | 10     | 731     | 267     | 802     | 5       |
| GO:008 |                                                              |        | 20/232 | 0.01314 | 0.05482 | 0.03744 |         |
| 0111   | DNA demethylation                                            | 5/1710 | 10     | 731     | 267     | 802     | 5       |
| GO:199 |                                                              |        | 20/232 | 0.01314 | 0.05482 | 0.03744 |         |
| 0776   | response to angiotensin                                      | 5/1710 | 10     | 731     | 267     | 802     | 5       |
| GO:190 |                                                              |        | 13/171 | 89/232  | 0.01323 | 0.05514 | 0.03766 |
| 3008   | organelle disassembly                                        | 0      | 10     | 381     | 402     | 752     | 13      |
| GO:004 |                                                              |        | 50/171 | 493/23  | 0.01355 | 0.05645 | 0.03855 |
| 8568   | embryonic organ development                                  | 0      | 210    | 699     | 043     | 99      | 50      |
| GO:003 | cellular response to extracellular stimulus                  | 26/171 | 223/23 | 0.01359 | 0.05655 | 0.03863 | 26      |

|        |                                                   |        |        |         |         |         |    |
|--------|---------------------------------------------------|--------|--------|---------|---------|---------|----|
| 1668   |                                                   | 0      | 210    | 158     | 413     | 073     |    |
| GO:000 |                                                   | 21/171 | 170/23 | 0.01370 | 0.05696 | 0.03891 |    |
| 7369   | gastrulation                                      | 0      | 210    | 004     | 486     | 129     | 21 |
| GO:007 |                                                   | 49/171 | 482/23 | 0.01384 | 0.05748 | 0.03926 |    |
| 1407   | cellular response to organic cyclic compound      | 0      | 210    | 059     | 755     | 833     | 49 |
| GO:001 |                                                   | 15/171 | 109/23 | 0.01384 | 0.05748 | 0.03926 |    |
| 5844   | monoamine transport                               | 0      | 210    | 91      | 755     | 833     | 15 |
| GO:005 |                                                   | 17/171 | 129/23 | 0.01385 | 0.05748 | 0.03926 |    |
| 1101   | regulation of DNA binding                         | 0      | 210    | 527     | 755     | 833     | 17 |
| GO:004 |                                                   |        | 44/232 | 0.01394 | 0.05779 | 0.03947 |    |
| 2181   | ketone biosynthetic process                       | 8/1710 | 10     | 853     | 242     | 658     | 8  |
| GO:007 |                                                   |        | 44/232 | 0.01394 | 0.05779 | 0.03947 |    |
| 1385   | cellular response to glucocorticoid stimulus      | 8/1710 | 10     | 853     | 242     | 658     | 8  |
| GO:000 |                                                   | 20/171 | 160/23 | 0.01407 | 0.05826 | 0.03979 |    |
| 7565   | female pregnancy                                  | 0      | 210    | 184     | 199     | 733     | 20 |
| GO:000 |                                                   | 13/171 | 90/232 | 0.01445 | 0.05972 | 0.04079 |    |
| 6497   | protein lipidation                                | 0      | 10     | 671     | 851     | 907     | 13 |
| GO:001 |                                                   | 13/171 | 90/232 | 0.01445 | 0.05972 | 0.04079 |    |
| 4031   | mesenchymal cell development                      | 0      | 10     | 671     | 851     | 907     | 13 |
| GO:004 |                                                   | 13/171 | 90/232 | 0.01445 | 0.05972 | 0.04079 |    |
| 5833   | negative regulation of lipid metabolic process    | 0      | 10     | 671     | 851     | 907     | 13 |
| GO:003 |                                                   |        | 53/232 | 0.01454 | 0.05988 | 0.04090 |    |
| 1113   | regulation of microtubule polymerization          | 9/1710 | 10     | 1       | 837     | 827     | 9  |
| GO:004 |                                                   |        | 53/232 | 0.01454 | 0.05988 | 0.04090 |    |
| 6902   | regulation of mitochondrial membrane permeability | 9/1710 | 10     | 1       | 837     | 827     | 9  |
| GO:003 | cytoskeleton-dependent intracellular transport    | 21/171 | 171/23 | 0.01456 | 0.05988 | 0.04090 | 21 |

|        |                                                           |        |        |         |         |         |    |
|--------|-----------------------------------------------------------|--------|--------|---------|---------|---------|----|
| 0705   |                                                           | 0      | 210    | 867     | 837     | 827     |    |
| GO:004 |                                                           | 21/171 | 171/23 | 0.01456 | 0.05988 | 0.04090 |    |
| 3271   | negative regulation of ion transport                      | 0      | 210    | 867     | 837     | 827     | 21 |
| GO:005 |                                                           | 29/171 | 257/23 | 0.01457 | 0.05988 | 0.04090 |    |
| 1403   | stress-activated MAPK cascade                             | 0      | 210    | 81      | 837     | 827     | 29 |
| GO:001 |                                                           | 10/171 | 62/232 | 0.01461 | 0.05988 | 0.04090 |    |
| 0171   | body morphogenesis                                        | 0      | 10     | 517     | 837     | 827     | 10 |
| GO:001 |                                                           |        | 28/232 | 0.01463 | 0.05988 | 0.04090 |    |
| 0458   | exit from mitosis                                         | 6/1710 | 10     | 077     | 837     | 827     | 6  |
| GO:003 |                                                           |        | 28/232 | 0.01463 | 0.05988 | 0.04090 |    |
| 1063   | regulation of histone deacetylation                       | 6/1710 | 10     | 077     | 837     | 827     | 6  |
| GO:004 |                                                           |        | 28/232 | 0.01463 | 0.05988 | 0.04090 |    |
| 4788   | modulation by host of viral process                       | 6/1710 | 10     | 077     | 837     | 827     | 6  |
| GO:004 |                                                           |        | 28/232 | 0.01463 | 0.05988 | 0.04090 |    |
| 5822   | negative regulation of heart contraction                  | 6/1710 | 10     | 077     | 837     | 827     | 6  |
| GO:008 |                                                           |        | 28/232 | 0.01463 | 0.05988 | 0.04090 |    |
| 6005   | ventricular cardiac muscle cell action potential          | 6/1710 | 10     | 077     | 837     | 827     | 6  |
| GO:009 |                                                           |        | 28/232 | 0.01463 | 0.05988 | 0.04090 |    |
| 0312   | positive regulation of protein deacetylation              | 6/1710 | 10     | 077     | 837     | 827     | 6  |
| GO:190 |                                                           |        | 28/232 | 0.01463 | 0.05988 | 0.04090 |    |
| 0745   | positive regulation of p38MAPK cascade                    | 6/1710 | 10     | 077     | 837     | 827     | 6  |
| GO:003 |                                                           |        | 36/232 | 0.01465 | 0.05988 | 0.04090 |    |
| 3363   | secretory granule organization                            | 7/1710 | 10     | 943     | 837     | 827     | 7  |
| GO:007 |                                                           |        | 36/232 | 0.01465 | 0.05988 | 0.04090 |    |
| 1398   | cellular response to fatty acid                           | 7/1710 | 10     | 943     | 837     | 827     | 7  |
| GO:190 | regulation of amyloid precursor protein catabolic process | 7/1710 | 36/232 | 0.01465 | 0.05988 | 0.04090 | 7  |



|        |                                                     |        |        |         |         |         |
|--------|-----------------------------------------------------|--------|--------|---------|---------|---------|
| 2991   |                                                     | 10     | 943    | 837     | 827     |         |
| GO:000 |                                                     | 24/171 | 203/23 | 0.01473 | 0.06011 | 0.04106 |
| 3018   | vascular process in circulatory system              | 0      | 210    | 613     | 765     | 489     |
| GO:190 |                                                     | 24/171 | 203/23 | 0.01473 | 0.06011 | 0.04106 |
| 3039   | positive regulation of leukocyte cell-cell adhesion | 0      | 210    | 613     | 765     | 489     |
| GO:000 |                                                     | 15/171 | 110/23 | 0.01497 | 0.06097 | 0.04165 |
| 1776   | leukocyte homeostasis                               | 0      | 210    | 794     | 641     | 149     |
| GO:001 |                                                     | 15/171 | 110/23 | 0.01497 | 0.06097 | 0.04165 |
| 9882   | antigen processing and presentation                 | 0      | 210    | 794     | 641     | 149     |
| GO:190 |                                                     | 15/171 | 110/23 | 0.01497 | 0.06097 | 0.04165 |
| 1657   | glycosyl compound metabolic process                 | 0      | 210    | 794     | 641     | 149     |
| GO:005 |                                                     | 26/171 | 225/23 | 0.01510 | 0.06145 | 0.04198 |
| 0670   | regulation of lymphocyte proliferation              | 0      | 210    | 715     | 961     | 154     |
| GO:000 |                                                     | 21/171 | 172/23 | 0.01548 | 0.06293 | 0.04298 |
| 6403   | RNA localization                                    | 0      | 210    | 024     | 359     | 839     |
| GO:004 |                                                     | 13/171 | 91/232 | 0.01576 | 0.06404 | 0.04374 |
| 5685   | regulation of glial cell differentiation            | 0      | 10     | 418     | 336     | 644     |
| GO:001 |                                                     | 11/171 | 72/232 | 0.01584 | 0.06431 | 0.04392 |
| 6575   | histone deacetylation                               | 0      | 10     | 107     | 102     | 927     |
| GO:005 |                                                     | 22/171 | 183/23 | 0.01587 | 0.06442 | 0.04400 |
| 0792   | regulation of viral process                         | 0      | 210    | 984     | 363     | 619     |
| GO:001 |                                                     |        | 45/232 | 0.01589 | 0.06445 | 0.04402 |
| 0464   | regulation of mesenchymal cell proliferation        | 8/1710 | 10     | 926     | 764     | 943     |
| GO:003 |                                                     | 14/171 | 101/23 | 0.01606 | 0.06470 | 0.04420 |
| 4446   | substrate adhesion-dependent cell spreading         | 0      | 210    | 857     | 806     | 048     |
| GO:005 | regulation of DNA metabolic process                 | 45/171 | 440/23 | 0.01611 | 0.06470 | 0.04420 |

|        |                                                                |        |        |         |         |         |   |
|--------|----------------------------------------------------------------|--------|--------|---------|---------|---------|---|
| 1052   |                                                                | 0      | 210    | 539     | 806     | 048     |   |
| GO:001 |                                                                |        | 14/232 | 0.01615 | 0.06470 | 0.04420 |   |
| 4819   | regulation of skeletal muscle contraction                      | 4/1710 | 10     | 533     | 806     | 048     | 4 |
| GO:001 |                                                                |        | 14/232 | 0.01615 | 0.06470 | 0.04420 |   |
| 4866   | skeletal myofibril assembly                                    | 4/1710 | 10     | 533     | 806     | 048     | 4 |
| GO:003 |                                                                |        | 14/232 | 0.01615 | 0.06470 | 0.04420 |   |
| 0812   | negative regulation of nucleotide catabolic process            | 4/1710 | 10     | 533     | 806     | 048     | 4 |
| GO:003 |                                                                |        | 14/232 | 0.01615 | 0.06470 | 0.04420 |   |
| 5791   | platelet-derived growth factor receptor-beta signaling pathway | 4/1710 | 10     | 533     | 806     | 048     | 4 |
| GO:004 |                                                                |        | 14/232 | 0.01615 | 0.06470 | 0.04420 |   |
| 2574   | retinal metabolic process                                      | 4/1710 | 10     | 533     | 806     | 048     | 4 |
| GO:004 |                                                                |        | 14/232 | 0.01615 | 0.06470 | 0.04420 |   |
| 5651   | positive regulation of macrophage differentiation              | 4/1710 | 10     | 533     | 806     | 048     | 4 |
| GO:004 |                                                                |        | 14/232 | 0.01615 | 0.06470 | 0.04420 |   |
| 6479   | glycosphingolipid catabolic process                            | 4/1710 | 10     | 533     | 806     | 048     | 4 |
| GO:004 |                                                                |        | 14/232 | 0.01615 | 0.06470 | 0.04420 |   |
| 8711   | positive regulation of astrocyte differentiation               | 4/1710 | 10     | 533     | 806     | 048     | 4 |
| GO:005 |                                                                |        | 14/232 | 0.01615 | 0.06470 | 0.04420 |   |
| 1198   | negative regulation of coenzyme metabolic process              | 4/1710 | 10     | 533     | 806     | 048     | 4 |
| GO:006 |                                                                |        | 14/232 | 0.01615 | 0.06470 | 0.04420 |   |
| 1469   | regulation of type B pancreatic cell proliferation             | 4/1710 | 10     | 533     | 806     | 048     | 4 |
| GO:007 |                                                                |        | 14/232 | 0.01615 | 0.06470 | 0.04420 |   |
| 1340   | skeletal muscle acetylcholine-gated channel clustering         | 4/1710 | 10     | 533     | 806     | 048     | 4 |
| GO:009 |                                                                |        | 14/232 | 0.01615 | 0.06470 | 0.04420 |   |
| 8911   | regulation of ventricular cardiac muscle cell action potential | 4/1710 | 10     | 533     | 806     | 048     | 4 |
| GO:190 | positive regulation of TORC1 signaling                         | 4/1710 | 14/232 | 0.01615 | 0.06470 | 0.04420 | 4 |

|        |                                                                                   |        |        |         |         |         |    |
|--------|-----------------------------------------------------------------------------------|--------|--------|---------|---------|---------|----|
| 4263   |                                                                                   |        | 10     | 533     | 806     | 048     |    |
| GO:000 |                                                                                   | 23/171 | 194/23 | 0.01619 | 0.06470 | 0.04420 |    |
| 6469   | negative regulation of protein kinase activity                                    | 0      | 210    | 896     | 806     | 048     | 23 |
| GO:003 |                                                                                   | 23/171 | 194/23 | 0.01619 | 0.06470 | 0.04420 |    |
| 0308   | negative regulation of cell growth                                                | 0      | 210    | 896     | 806     | 048     | 23 |
| GO:000 | neurological system process involved in regulation of systemic arterial blood     |        | 21/232 | 0.01623 | 0.06470 | 0.04420 |    |
| 1976   | pressure                                                                          | 5/1710 | 10     | 103     | 806     | 048     | 5  |
| GO:003 |                                                                                   |        | 21/232 | 0.01623 | 0.06470 | 0.04420 |    |
| 1065   | positive regulation of histone deacetylation                                      | 5/1710 | 10     | 103     | 806     | 048     | 5  |
| GO:003 |                                                                                   |        | 21/232 | 0.01623 | 0.06470 | 0.04420 |    |
| 6303   | lymph vessel morphogenesis                                                        | 5/1710 | 10     | 103     | 806     | 048     | 5  |
| GO:009 |                                                                                   |        | 21/232 | 0.01623 | 0.06470 | 0.04420 |    |
| 0050   | positive regulation of cell migration involved in sprouting angiogenesis          | 5/1710 | 10     | 103     | 806     | 048     | 5  |
| GO:190 | positive regulation of transcription from RNA polymerase II promoter involved in  |        | 21/232 | 0.01623 | 0.06470 | 0.04420 |    |
| 1522   | cellular response to chemical stimulus                                            | 5/1710 | 10     | 103     | 806     | 048     | 5  |
| GO:000 |                                                                                   | 10/171 | 63/232 | 0.01626 | 0.06470 | 0.04420 |    |
| 8652   | cellular amino acid biosynthetic process                                          | 0      | 10     | 009     | 806     | 048     | 10 |
| GO:003 |                                                                                   | 10/171 | 63/232 | 0.01626 | 0.06470 | 0.04420 |    |
| 4121   | regulation of toll-like receptor signaling pathway                                | 0      | 10     | 009     | 806     | 048     | 10 |
| GO:004 |                                                                                   | 10/171 | 63/232 | 0.01626 | 0.06470 | 0.04420 |    |
| 2246   | tissue regeneration                                                               | 0      | 10     | 009     | 806     | 048     | 10 |
| GO:004 |                                                                                   | 10/171 | 63/232 | 0.01626 | 0.06470 | 0.04420 |    |
| 3388   | positive regulation of DNA binding                                                | 0      | 10     | 009     | 806     | 048     | 10 |
| GO:007 |                                                                                   | 10/171 | 63/232 | 0.01626 | 0.06470 | 0.04420 |    |
| 0059   | intrinsic apoptotic signaling pathway in response to endoplasmic reticulum stress | 0      | 10     | 009     | 806     | 048     | 10 |
| GO:003 | regulation of hormone metabolic process                                           | 9/1710 | 54/232 | 0.01634 | 0.06485 | 0.04430 | 9  |

|        |                                                                |        |        |         |         |         |    |
|--------|----------------------------------------------------------------|--------|--------|---------|---------|---------|----|
| 2350   |                                                                |        | 10     | 176     | 636     | 178     |    |
| GO:003 |                                                                |        | 54/232 | 0.01634 | 0.06485 | 0.04430 |    |
| 5272   | exocrine system development                                    | 9/1710 | 10     | 176     | 636     | 178     | 9  |
| GO:004 |                                                                |        | 54/232 | 0.01634 | 0.06485 | 0.04430 |    |
| 5687   | positive regulation of glial cell differentiation              | 9/1710 | 10     | 176     | 636     | 178     | 9  |
| GO:004 |                                                                |        | 54/232 | 0.01634 | 0.06485 | 0.04430 |    |
| 6718   | viral entry into host cell                                     | 9/1710 | 10     | 176     | 636     | 178     | 9  |
| GO:190 |                                                                | 12/171 | 82/232 | 0.01666 | 0.06608 | 0.04513 |    |
| 3317   | regulation of protein maturation                               | 0      | 10     | 182     | 171     | 879     | 12 |
| GO:000 |                                                                | 41/171 | 395/23 | 0.01672 | 0.06630 | 0.04529 |    |
| 9314   | response to radiation                                          | 0      | 210    | 947     | 501     | 132     | 41 |
| GO:004 |                                                                | 29/171 | 260/23 | 0.01684 | 0.06673 | 0.04558 |    |
| 8588   | developmental cell growth                                      | 0      | 210    | 856     | 173     | 28      | 29 |
| GO:001 |                                                                |        | 37/232 | 0.01696 | 0.06689 | 0.04569 |    |
| 5695   | organic cation transport                                       | 7/1710 | 10     | 101     | 754     | 606     | 7  |
| GO:003 |                                                                |        | 37/232 | 0.01696 | 0.06689 | 0.04569 |    |
| 3028   | myeloid cell apoptotic process                                 | 7/1710 | 10     | 101     | 754     | 606     | 7  |
| GO:005 |                                                                |        | 37/232 | 0.01696 | 0.06689 | 0.04569 |    |
| 1647   | nucleus localization                                           | 7/1710 | 10     | 101     | 754     | 606     | 7  |
| GO:006 |                                                                |        | 37/232 | 0.01696 | 0.06689 | 0.04569 |    |
| 0071   | Wnt signaling pathway, planar cell polarity pathway            | 7/1710 | 10     | 101     | 754     | 606     | 7  |
| GO:007 |                                                                |        | 37/232 | 0.01696 | 0.06689 | 0.04569 |    |
| 1158   | positive regulation of cell cycle arrest                       | 7/1710 | 10     | 101     | 754     | 606     | 7  |
| GO:007 |                                                                |        | 37/232 | 0.01696 | 0.06689 | 0.04569 |    |
| 2599   | establishment of protein localization to endoplasmic reticulum | 7/1710 | 10     | 101     | 754     | 606     | 7  |
| GO:003 | mammary gland development                                      | 20/171 | 163/23 | 0.01697 | 0.06689 | 0.04569 | 20 |

|        |                                                                |        |        |         |         |         |         |
|--------|----------------------------------------------------------------|--------|--------|---------|---------|---------|---------|
| 0879   |                                                                | 0      | 210    | 058     | 754     | 606     |         |
| GO:000 |                                                                |        | 29/232 | 0.01732 | 0.06806 | 0.04649 |         |
| 6734   | NADH metabolic process                                         | 6/1710 | 10     | 616     | 956     | 664     | 6       |
| GO:003 |                                                                |        | 29/232 | 0.01732 | 0.06806 | 0.04649 |         |
| 4629   | cellular protein-containing complex localization               | 6/1710 | 10     | 616     | 956     | 664     | 6       |
| GO:004 |                                                                |        | 29/232 | 0.01732 | 0.06806 | 0.04649 |         |
| 3090   | amino acid import                                              | 6/1710 | 10     | 616     | 956     | 664     | 6       |
| GO:006 |                                                                |        | 29/232 | 0.01732 | 0.06806 | 0.04649 |         |
| 0914   | heart formation                                                | 6/1710 | 10     | 616     | 956     | 664     | 6       |
| GO:007 |                                                                |        | 29/232 | 0.01732 | 0.06806 | 0.04649 |         |
| 1548   | response to dexamethasone                                      | 6/1710 | 10     | 616     | 956     | 664     | 6       |
| GO:004 |                                                                |        | 14/171 | 102/23  | 0.01740 | 0.06832 | 0.04667 |
| 6427   | positive regulation of JAK-STAT cascade                        | 0      | 210    | 31      | 588     | 173     | 14      |
| GO:004 |                                                                |        | 15/171 | 112/23  | 0.01744 | 0.06841 | 0.04673 |
| 3123   | positive regulation of I-kappaB kinase/NF-kappaB signaling     | 0      | 210    | 739     | 298     | 122     | 15      |
| GO:004 |                                                                |        | 11/171 | 73/232  | 0.01744 | 0.06841 | 0.04673 |
| 5670   | regulation of osteoclast differentiation                       | 0      | 10     | 871     | 298     | 122     | 11      |
| GO:001 |                                                                |        | 31/171 | 283/23  | 0.01750 | 0.06857 | 0.04684 |
| 6032   | viral process                                                  | 0      | 210    | 248     | 779     | 38      | 31      |
| GO:000 |                                                                |        | 22/171 | 185/23  | 0.01780 | 0.06973 | 0.04763 |
| 1764   | neuron migration                                               | 0      | 210    | 973     | 487     | 417     | 22      |
| GO:000 |                                                                |        | 18/171 | 143/23  | 0.01792 | 0.07014 | 0.04791 |
| 9267   | cellular response to starvation                                | 0      | 210    | 528     | 032     | 112     | 18      |
| GO:003 |                                                                |        | 20/171 | 164/23  | 0.01803 | 0.07035 | 0.04805 |
| 0902   | hindbrain development                                          | 0      | 210    | 404     | 204     | 574     | 20      |
| GO:001 | positive regulation of cellular carbohydrate metabolic process | 10/171 | 64/232 | 0.01803 | 0.07035 | 0.04805 | 10      |

|        |                                                                |        |        |         |         |         |    |
|--------|----------------------------------------------------------------|--------|--------|---------|---------|---------|----|
| 0676   |                                                                | 0      | 10     | 821     | 204     | 574     |    |
| GO:001 |                                                                |        | 46/232 | 0.01803 | 0.07035 | 0.04805 |    |
| 0677   | negative regulation of cellular carbohydrate metabolic process | 8/1710 | 10     | 96      | 204     | 574     | 8  |
| GO:004 |                                                                |        | 46/232 | 0.01803 | 0.07035 | 0.04805 |    |
| 3029   | T cell homeostasis                                             | 8/1710 | 10     | 96      | 204     | 574     | 8  |
| GO:007 |                                                                |        | 46/232 | 0.01803 | 0.07035 | 0.04805 |    |
| 1384   | cellular response to corticosteroid stimulus                   | 8/1710 | 10     | 96      | 204     | 574     | 8  |
| GO:190 |                                                                | 12/171 | 83/232 | 0.01821 | 0.07098 | 0.04848 |    |
| 3363   | negative regulation of cellular protein catabolic process      | 0      | 10     | 405     | 496     | 808     | 12 |
| GO:000 |                                                                | 31/171 | 284/23 | 0.01830 | 0.07127 | 0.04868 |    |
| 7162   | negative regulation of cell adhesion                           | 0      | 210    | 733     | 541     | 648     | 31 |
| GO:003 |                                                                | 17/171 | 133/23 | 0.01831 | 0.07127 | 0.04868 |    |
| 5966   | response to topologically incorrect protein                    | 0      | 210    | 297     | 541     | 648     | 17 |
| GO:003 |                                                                | 40/171 | 386/23 | 0.01837 | 0.07146 | 0.04881 |    |
| 0900   | forebrain development                                          | 0      | 210    | 277     | 053     | 293     | 40 |
| GO:003 |                                                                | 47/171 | 467/23 | 0.01843 | 0.07165 | 0.04894 |    |
| 4660   | ncRNA metabolic process                                        | 0      | 210    | 569     | 754     | 75      | 47 |
| GO:003 |                                                                | 21/171 | 175/23 | 0.01848 | 0.07175 | 0.04901 |    |
| 5107   | appendage morphogenesis                                        | 0      | 210    | 643     | 929     | 701     | 21 |
| GO:003 |                                                                | 21/171 | 175/23 | 0.01848 | 0.07175 | 0.04901 |    |
| 5108   | limb morphogenesis                                             | 0      | 210    | 643     | 929     | 701     | 21 |
| GO:000 |                                                                | 13/171 | 93/232 | 0.01864 | 0.07233 | 0.04940 |    |
| 2027   | regulation of heart rate                                       | 0      | 10     | 675     | 355     | 927     | 13 |
| GO:000 |                                                                | 15/171 | 113/23 | 0.01879 | 0.07285 | 0.04976 |    |
| 1952   | regulation of cell-matrix adhesion                             | 0      | 210    | 326     | 35      | 443     | 15 |
| GO:005 | protein homotetramerization                                    | 14/171 | 103/23 | 0.01882 | 0.07290 | 0.04980 | 14 |

|        |                                                                    |        |        |         |         |         |    |
|--------|--------------------------------------------------------------------|--------|--------|---------|---------|---------|----|
| 1289   |                                                                    | 0      | 210    | 031     | 997     | 301     |    |
| GO:190 |                                                                    | 23/171 | 197/23 | 0.01910 | 0.07398 | 0.05053 |    |
| 2275   | regulation of chromatin organization                               | 0      | 210    | 928     | 039     | 418     | 23 |
| GO:001 |                                                                    | 11/171 | 74/232 | 0.01917 | 0.07418 | 0.05067 |    |
| 0822   | positive regulation of mitochondrion organization                  | 0      | 10     | 473     | 461     | 368     | 11 |
| GO:000 |                                                                    | 34/171 | 319/23 | 0.01936 | 0.07487 | 0.05114 |    |
| 7159   | leukocyte cell-cell adhesion                                       | 0      | 210    | 513     | 166     | 299     | 34 |
| GO:004 |                                                                    |        | 38/232 | 0.01950 | 0.07531 | 0.05144 |    |
| 0019   | positive regulation of embryonic development                       | 7/1710 | 10     | 617     | 729     | 739     | 7  |
| GO:190 |                                                                    |        | 38/232 | 0.01950 | 0.07531 | 0.05144 |    |
| 0026   | positive regulation of substrate adhesion-dependent cell spreading | 7/1710 | 10     | 617     | 729     | 739     | 7  |
| GO:000 |                                                                    | 17/171 | 134/23 | 0.01958 | 0.07556 | 0.05161 |    |
| 2698   | negative regulation of immune effector process                     | 0      | 210    | 307     | 425     | 608     | 17 |
| GO:000 |                                                                    |        | 22/232 | 0.01976 | 0.07564 | 0.05167 |    |
| 2183   | cytoplasmic translational initiation                               | 5/1710 | 10     | 026     | 838     | 354     | 5  |
| GO:000 |                                                                    |        | 22/232 | 0.01976 | 0.07564 | 0.05167 |    |
| 9067   | aspartate family amino acid biosynthetic process                   | 5/1710 | 10     | 026     | 838     | 354     | 5  |
| GO:001 |                                                                    |        | 22/232 | 0.01976 | 0.07564 | 0.05167 |    |
| 5874   | norepinephrine transport                                           | 5/1710 | 10     | 026     | 838     | 354     | 5  |
| GO:003 |                                                                    |        | 22/232 | 0.01976 | 0.07564 | 0.05167 |    |
| 2042   | mitochondrial DNA metabolic process                                | 5/1710 | 10     | 026     | 838     | 354     | 5  |
| GO:003 |                                                                    |        | 22/232 | 0.01976 | 0.07564 | 0.05167 |    |
| 2691   | negative regulation of interleukin-1 beta production               | 5/1710 | 10     | 026     | 838     | 354     | 5  |
| GO:003 |                                                                    |        | 22/232 | 0.01976 | 0.07564 | 0.05167 |    |
| 5268   | protein mannosylation                                              | 5/1710 | 10     | 026     | 838     | 354     | 5  |
| GO:003 | DNA dealkylation                                                   | 5/1710 | 22/232 | 0.01976 | 0.07564 | 0.05167 | 5  |

|        |                                                                    |        |        |         |         |         |         |
|--------|--------------------------------------------------------------------|--------|--------|---------|---------|---------|---------|
| 5510   |                                                                    |        | 10     | 026     | 838     | 354     |         |
| GO:005 |                                                                    |        | 22/232 | 0.01976 | 0.07564 | 0.05167 |         |
| 1654   | establishment of mitochondrion localization                        | 5/1710 | 10     | 026     | 838     | 354     | 5       |
| GO:006 |                                                                    |        | 22/232 | 0.01976 | 0.07564 | 0.05167 |         |
| 0749   | mammary gland alveolus development                                 | 5/1710 | 10     | 026     | 838     | 354     | 5       |
| GO:006 |                                                                    |        | 22/232 | 0.01976 | 0.07564 | 0.05167 |         |
| 1377   | mammary gland lobule development                                   | 5/1710 | 10     | 026     | 838     | 354     | 5       |
| GO:009 |                                                                    |        | 22/232 | 0.01976 | 0.07564 | 0.05167 |         |
| 0382   | phagosome maturation                                               | 5/1710 | 10     | 026     | 838     | 354     | 5       |
| GO:009 |                                                                    |        | 22/232 | 0.01976 | 0.07564 | 0.05167 |         |
| 7062   | dendritic spine maintenance                                        | 5/1710 | 10     | 026     | 838     | 354     | 5       |
| GO:007 |                                                                    |        | 35/171 | 331/23  | 0.01991 | 0.07610 | 0.05198 |
| 0661   | leukocyte proliferation                                            | 0      | 210    | 122     | 494     | 541     | 35      |
| GO:000 |                                                                    |        | 22/171 | 187/23  | 0.01991 | 0.07610 | 0.05198 |
| 6473   | protein acetylation                                                | 0      | 210    | 86      | 494     | 541     | 22      |
| GO:003 |                                                                    |        | 22/171 | 187/23  | 0.01991 | 0.07610 | 0.05198 |
| 0534   | adult behavior                                                     | 0      | 210    | 86      | 494     | 541     | 22      |
| GO:004 |                                                                    |        | 10/171 | 65/232  | 0.01995 | 0.07619 | 0.05204 |
| 2440   | pigment metabolic process                                          | 0      | 10     | 533     | 546     | 724     | 10      |
| GO:001 |                                                                    |        | 49/171 | 493/23  | 0.02014 | 0.07684 | 0.05249 |
| 0035   | response to inorganic substance                                    | 0      | 210    | 782     | 631     | 182     | 49      |
| GO:000 |                                                                    |        | 23/171 | 198/23  | 0.02016 | 0.07684 | 0.05249 |
| 9743   | response to carbohydrate                                           | 0      | 210    | 525     | 631     | 182     | 23      |
| GO:004 |                                                                    |        | 23/171 | 198/23  | 0.02016 | 0.07684 | 0.05249 |
| 3903   | regulation of symbiosis, encompassing mutualism through parasitism | 0      | 210    | 525     | 631     | 182     | 23      |
| GO:000 | ureteric bud development                                           | 14/171 | 104/23 | 0.02032 | 0.07692 | 0.05254 | 14      |



|        |                                                                           |        |        |         |         |         |    |
|--------|---------------------------------------------------------------------------|--------|--------|---------|---------|---------|----|
| 1657   |                                                                           | 0      | 210    | 318     | 412     | 497     |    |
| GO:007 |                                                                           | 14/171 | 104/23 | 0.02032 | 0.07692 | 0.05254 |    |
| 2163   | mesonephric epithelium development                                        | 0      | 210    | 318     | 412     | 497     | 14 |
| GO:007 |                                                                           | 14/171 | 104/23 | 0.02032 | 0.07692 | 0.05254 |    |
| 2164   | mesonephric tubule development                                            | 0      | 210    | 318     | 412     | 497     | 14 |
| GO:001 |                                                                           | 24/171 | 209/23 | 0.02033 | 0.07692 | 0.05254 |    |
| 9722   | calcium-mediated signaling                                                | 0      | 210    | 408     | 412     | 497     | 24 |
| GO:000 |                                                                           |        | 30/232 | 0.02034 | 0.07692 | 0.05254 |    |
| 6482   | protein demethylation                                                     | 6/1710 | 10     | 368     | 412     | 497     | 6  |
| GO:000 |                                                                           |        | 30/232 | 0.02034 | 0.07692 | 0.05254 |    |
| 8214   | protein dealkylation                                                      | 6/1710 | 10     | 368     | 412     | 497     | 6  |
| GO:001 |                                                                           |        | 30/232 | 0.02034 | 0.07692 | 0.05254 |    |
| 0043   | response to zinc ion                                                      | 6/1710 | 10     | 368     | 412     | 497     | 6  |
| GO:003 |                                                                           |        | 30/232 | 0.02034 | 0.07692 | 0.05254 |    |
| 4260   | negative regulation of GTPase activity                                    | 6/1710 | 10     | 368     | 412     | 497     | 6  |
| GO:004 |                                                                           |        | 30/232 | 0.02034 | 0.07692 | 0.05254 |    |
| 4062   | regulation of excretion                                                   | 6/1710 | 10     | 368     | 412     | 497     | 6  |
| GO:005 |                                                                           |        | 30/232 | 0.02034 | 0.07692 | 0.05254 |    |
| 5022   | negative regulation of cardiac muscle tissue growth                       | 6/1710 | 10     | 368     | 412     | 497     | 6  |
| GO:006 |                                                                           |        | 30/232 | 0.02034 | 0.07692 | 0.05254 |    |
| 1117   | negative regulation of heart growth                                       | 6/1710 | 10     | 368     | 412     | 497     | 6  |
| GO:190 |                                                                           |        | 30/232 | 0.02034 | 0.07692 | 0.05254 |    |
| 2253   | regulation of intrinsic apoptotic signaling pathway by p53 class mediator | 6/1710 | 10     | 368     | 412     | 497     | 6  |
| GO:007 |                                                                           | 18/171 | 145/23 | 0.02038 | 0.07701 | 0.05260 |    |
| 0665   | positive regulation of leukocyte proliferation                            | 0      | 210    | 152     | 736     | 866     | 18 |
| GO:000 | excretion                                                                 | 9/1710 | 56/232 | 0.02042 | 0.07702 | 0.05261 | 9  |

|        |                                                                             |        |        |         |         |         |         |
|--------|-----------------------------------------------------------------------------|--------|--------|---------|---------|---------|---------|
| 7588   |                                                                             |        | 10     | 408     | 872     | 642     |         |
| GO:003 |                                                                             |        | 56/232 | 0.02042 | 0.07702 | 0.05261 |         |
| 5567   | non-canonical Wnt signaling pathway                                         | 9/1710 | 10     | 408     | 872     | 642     | 9       |
| GO:004 |                                                                             |        | 56/232 | 0.02042 | 0.07702 | 0.05261 |         |
| 2743   | hydrogen peroxide metabolic process                                         | 9/1710 | 10     | 408     | 872     | 642     | 9       |
| GO:001 |                                                                             |        | 27/171 | 242/23  | 0.02046 | 0.07707 | 0.05264 |
| 0466   | negative regulation of peptidase activity                                   | 0      | 210    | 217     | 03      | 482     | 27      |
| GO:000 |                                                                             |        | 26/171 | 231/23  | 0.02047 | 0.07707 | 0.05264 |
| 9952   | anterior/posterior pattern specification                                    | 0      | 210    | 468     | 03      | 482     | 26      |
| GO:004 |                                                                             |        | 26/171 | 231/23  | 0.02047 | 0.07707 | 0.05264 |
| 3543   | protein acylation                                                           | 0      | 210    | 468     | 03      | 482     | 26      |
| GO:000 |                                                                             |        | 15/232 | 0.02076 | 0.07723 | 0.05275 |         |
| 6704   | glucocorticoid biosynthetic process                                         | 4/1710 | 10     | 968     | 52      | 746     | 4       |
| GO:000 | DNA damage response, signal transduction by p53 class mediator resulting in |        | 15/232 | 0.02076 | 0.07723 | 0.05275 |         |
| 6978   | transcription of p21 class mediator                                         | 4/1710 | 10     | 968     | 52      | 746     | 4       |
| GO:000 |                                                                             |        | 15/232 | 0.02076 | 0.07723 | 0.05275 |         |
| 9083   | branched-chain amino acid catabolic process                                 | 4/1710 | 10     | 968     | 52      | 746     | 4       |
| GO:001 |                                                                             |        | 15/232 | 0.02076 | 0.07723 | 0.05275 |         |
| 0172   | embryonic body morphogenesis                                                | 4/1710 | 10     | 968     | 52      | 746     | 4       |
| GO:001 |                                                                             |        | 15/232 | 0.02076 | 0.07723 | 0.05275 |         |
| 0523   | negative regulation of calcium ion transport into cytosol                   | 4/1710 | 10     | 968     | 52      | 746     | 4       |
| GO:001 |                                                                             |        | 15/232 | 0.02076 | 0.07723 | 0.05275 |         |
| 0715   | regulation of extracellular matrix disassembly                              | 4/1710 | 10     | 968     | 52      | 746     | 4       |
| GO:001 |                                                                             |        | 15/232 | 0.02076 | 0.07723 | 0.05275 |         |
| 4857   | regulation of skeletal muscle cell proliferation                            | 4/1710 | 10     | 968     | 52      | 746     | 4       |
| GO:001 | glycolipid catabolic process                                                | 4/1710 | 15/232 | 0.02076 | 0.07723 | 0.05275 | 4       |

|        |                                                                    |        |        |         |         |         |    |
|--------|--------------------------------------------------------------------|--------|--------|---------|---------|---------|----|
| 9377   |                                                                    |        | 10     | 968     | 52      | 746     |    |
| GO:003 |                                                                    |        | 15/232 | 0.02076 | 0.07723 | 0.05275 |    |
| 9535   | regulation of RIG-I signaling pathway                              | 4/1710 | 10     | 968     | 52      | 746     | 4  |
| GO:004 |                                                                    |        | 15/232 | 0.02076 | 0.07723 | 0.05275 |    |
| 3129   | surfactant homeostasis                                             | 4/1710 | 10     | 968     | 52      | 746     | 4  |
| GO:005 |                                                                    |        | 15/232 | 0.02076 | 0.07723 | 0.05275 |    |
| 0930   | induction of positive chemotaxis                                   | 4/1710 | 10     | 968     | 52      | 746     | 4  |
| GO:005 |                                                                    |        | 15/232 | 0.02076 | 0.07723 | 0.05275 |    |
| 5089   | fatty acid homeostasis                                             | 4/1710 | 10     | 968     | 52      | 746     | 4  |
| GO:006 |                                                                    |        | 15/232 | 0.02076 | 0.07723 | 0.05275 |    |
| 1430   | bone trabecula morphogenesis                                       | 4/1710 | 10     | 968     | 52      | 746     | 4  |
| GO:007 |                                                                    |        | 15/232 | 0.02076 | 0.07723 | 0.05275 |    |
| 2567   | chemokine (C-X-C motif) ligand 2 production                        | 4/1710 | 10     | 968     | 52      | 746     | 4  |
| GO:008 |                                                                    |        | 15/232 | 0.02076 | 0.07723 | 0.05275 |    |
| 6014   | atrial cardiac muscle cell action potential                        | 4/1710 | 10     | 968     | 52      | 746     | 4  |
| GO:008 |                                                                    |        | 15/232 | 0.02076 | 0.07723 | 0.05275 |    |
| 6026   | atrial cardiac muscle cell to AV node cell signaling               | 4/1710 | 10     | 968     | 52      | 746     | 4  |
| GO:008 |                                                                    |        | 15/232 | 0.02076 | 0.07723 | 0.05275 |    |
| 6066   | atrial cardiac muscle cell to AV node cell communication           | 4/1710 | 10     | 968     | 52      | 746     | 4  |
| GO:009 |                                                                    |        | 15/232 | 0.02076 | 0.07723 | 0.05275 |    |
| 7050   | type B pancreatic cell apoptotic process                           | 4/1710 | 10     | 968     | 52      | 746     | 4  |
| GO:190 |                                                                    |        | 15/232 | 0.02076 | 0.07723 | 0.05275 |    |
| 4814   | regulation of protein localization to chromosome, telomeric region | 4/1710 | 10     | 968     | 52      | 746     | 4  |
| GO:000 |                                                                    | 11/171 | 75/232 | 0.02102 | 0.07798 | 0.05326 |    |
| 8625   | extrinsic apoptotic signaling pathway via death domain receptors   | 0      | 10     | 388     | 193     | 753     | 11 |
| GO:004 | hormone biosynthetic process                                       | 11/171 | 75/232 | 0.02102 | 0.07798 | 0.05326 | 11 |

|        |                                                               |        |        |         |         |         |    |
|--------|---------------------------------------------------------------|--------|--------|---------|---------|---------|----|
| 2446   |                                                               | 0      | 10     | 388     | 193     | 753     |    |
| GO:006 |                                                               | 11/171 | 75/232 | 0.02102 | 0.07798 | 0.05326 |    |
| 1097   | regulation of protein tyrosine kinase activity                | 0      | 10     | 388     | 193     | 753     | 11 |
| GO:007 |                                                               | 11/171 | 75/232 | 0.02102 | 0.07798 | 0.05326 |    |
| 0373   | negative regulation of ERK1 and ERK2 cascade                  | 0      | 10     | 388     | 193     | 753     | 11 |
| GO:001 |                                                               | 23/171 | 199/23 | 0.02126 | 0.07883 | 0.05384 |    |
| 9058   | viral life cycle                                              | 0      | 210    | 613     | 041     | 711     | 23 |
| GO:190 |                                                               | 26/171 | 232/23 | 0.02149 | 0.07964 | 0.05440 |    |
| 3531   | negative regulation of secretion by cell                      | 0      | 210    | 889     | 267     | 195     | 26 |
| GO:007 |                                                               | 20/171 | 167/23 | 0.02153 | 0.07973 | 0.05446 |    |
| 1897   | DNA biosynthetic process                                      | 0      | 210    | 739     | 475     | 484     | 20 |
| GO:005 |                                                               | 12/171 | 85/232 | 0.02163 | 0.08006 | 0.05468 |    |
| 1384   | response to glucocorticoid                                    | 0      | 10     | 979     | 309     | 913     | 12 |
| GO:004 |                                                               | 15/171 | 115/23 | 0.02172 | 0.08027 | 0.05483 |    |
| 3244   | regulation of protein complex disassembly                     | 0      | 210    | 037     | 519     | 4       | 15 |
| GO:004 |                                                               | 37/171 | 356/23 | 0.02172 | 0.08027 | 0.05483 |    |
| 4772   | mitotic cell cycle phase transition                           | 0      | 210    | 459     | 519     | 4       | 37 |
| GO:005 |                                                               | 14/171 | 105/23 | 0.02191 | 0.08092 | 0.05527 |    |
| 0764   | regulation of phagocytosis                                    | 0      | 210    | 468     | 638     | 882     | 14 |
| GO:006 |                                                               | 21/171 | 178/23 | 0.02192 | 0.08092 | 0.05528 |    |
| 1136   | regulation of proteasomal protein catabolic process           | 0      | 210    | 913     | 86      | 034     | 21 |
| GO:003 |                                                               | 10/171 | 66/232 | 0.02201 | 0.08115 | 0.05543 |    |
| 4394   | protein localization to cell surface                          | 0      | 10     | 712     | 079     | 211     | 10 |
| GO:190 |                                                               | 10/171 | 66/232 | 0.02201 | 0.08115 | 0.05543 |    |
| 4377   | positive regulation of protein localization to cell periphery | 0      | 10     | 712     | 079     | 211     | 10 |
| GO:001 | peptidyl-lysine modification                                  | 36/171 | 345/23 | 0.02209 | 0.08139 | 0.05560 | 36 |

|        |                                                                       |        |        |         |         |         |    |
|--------|-----------------------------------------------------------------------|--------|--------|---------|---------|---------|----|
| 8205   |                                                                       | 0      | 210    | 815     | 81      | 103     |    |
| GO:003 |                                                                       |        | 39/232 | 0.02230 | 0.08181 | 0.05588 |    |
| 2008   | positive regulation of TOR signaling                                  | 7/1710 | 10     | 643     | 916     | 865     | 7  |
| GO:009 |                                                                       |        | 39/232 | 0.02230 | 0.08181 | 0.05588 |    |
| 0175   | regulation of establishment of planar polarity                        | 7/1710 | 10     | 643     | 916     | 865     | 7  |
| GO:009 |                                                                       |        | 39/232 | 0.02230 | 0.08181 | 0.05588 |    |
| 7009   | energy homeostasis                                                    | 7/1710 | 10     | 643     | 916     | 865     | 7  |
| GO:190 |                                                                       |        | 39/232 | 0.02230 | 0.08181 | 0.05588 |    |
| 1021   | positive regulation of calcium ion transmembrane transporter activity | 7/1710 | 10     | 643     | 916     | 865     | 7  |
| GO:001 |                                                                       | 17/171 | 136/23 | 0.02232 | 0.08181 | 0.05588 |    |
| 7148   | negative regulation of translation                                    | 0      | 210    | 45      | 916     | 865     | 17 |
| GO:004 |                                                                       | 17/171 | 136/23 | 0.02232 | 0.08181 | 0.05588 |    |
| 3624   | cellular protein complex disassembly                                  | 0      | 210    | 45      | 916     | 865     | 17 |
| GO:005 |                                                                       | 17/171 | 136/23 | 0.02232 | 0.08181 | 0.05588 |    |
| 0671   | positive regulation of lymphocyte proliferation                       | 0      | 210    | 45      | 916     | 865     | 17 |
| GO:200 |                                                                       | 17/171 | 136/23 | 0.02232 | 0.08181 | 0.05588 |    |
| 1056   | positive regulation of cysteine-type endopeptidase activity           | 0      | 210    | 45      | 916     | 865     | 17 |
| GO:000 |                                                                       |        | 57/232 | 0.02271 | 0.08311 | 0.05677 |    |
| 1736   | establishment of planar polarity                                      | 9/1710 | 10     | 968     | 105     | 111     | 9  |
| GO:000 |                                                                       |        | 57/232 | 0.02271 | 0.08311 | 0.05677 |    |
| 9247   | glycolipid biosynthetic process                                       | 9/1710 | 10     | 968     | 105     | 111     | 9  |
| GO:004 |                                                                       |        | 57/232 | 0.02271 | 0.08311 | 0.05677 |    |
| 2551   | neuron maturation                                                     | 9/1710 | 10     | 968     | 105     | 111     | 9  |
| GO:190 |                                                                       | 20/171 | 168/23 | 0.02281 | 0.08340 | 0.05697 |    |
| 2107   | positive regulation of leukocyte differentiation                      | 0      | 210    | 459     | 604     | 261     | 20 |
| GO:003 | adherens junction organization                                        | 16/171 | 126/23 | 0.02286 | 0.08354 | 0.05706 | 16 |

|        |                                                   |        |        |         |         |         |    |
|--------|---------------------------------------------------|--------|--------|---------|---------|---------|----|
| 4332   |                                                   | 0      | 210    | 933     | 831     | 98      |    |
| GO:001 |                                                   |        | 48/232 | 0.02292 | 0.08354 | 0.05706 |    |
| 0107   | potassium ion import                              | 8/1710 | 10     | 502     | 831     | 98      | 8  |
| GO:004 |                                                   |        | 48/232 | 0.02292 | 0.08354 | 0.05706 |    |
| 7496   | vesicle transport along microtubule               | 8/1710 | 10     | 502     | 831     | 98      | 8  |
| GO:005 |                                                   |        | 48/232 | 0.02292 | 0.08354 | 0.05706 |    |
| 0850   | positive regulation of calcium-mediated signaling | 8/1710 | 10     | 502     | 831     | 98      | 8  |
| GO:190 |                                                   |        | 48/232 | 0.02292 | 0.08354 | 0.05706 |    |
| 4591   | positive regulation of protein import             | 8/1710 | 10     | 502     | 831     | 98      | 8  |
| GO:004 |                                                   | 11/171 | 76/232 | 0.02300 | 0.08372 | 0.05718 |    |
| 8844   | artery morphogenesis                              | 0      | 10     | 084     | 017     | 719     | 11 |
| GO:006 |                                                   | 11/171 | 76/232 | 0.02300 | 0.08372 | 0.05718 |    |
| 0350   | endochondral bone morphogenesis                   | 0      | 10     | 084     | 017     | 719     | 11 |
| GO:001 |                                                   | 18/171 | 147/23 | 0.02308 | 0.08398 | 0.05736 |    |
| 6482   | cytosolic transport                               | 0      | 210    | 8       | 51      | 815     | 18 |
| GO:005 |                                                   | 15/171 | 116/23 | 0.02330 | 0.08472 | 0.05787 |    |
| 1261   | protein depolymerization                          | 0      | 210    | 679     | 822     | 576     | 15 |
| GO:007 |                                                   | 22/171 | 190/23 | 0.02343 | 0.08515 | 0.05817 |    |
| 1695   | anatomical structure maturation                   | 0      | 210    | 997     | 938     | 028     | 22 |
| GO:001 |                                                   | 12/171 | 86/232 | 0.02352 | 0.08540 | 0.05833 |    |
| 5908   | fatty acid transport                              | 0      | 10     | 121     | 144     | 562     | 12 |
| GO:190 |                                                   | 14/171 | 106/23 | 0.02359 | 0.08540 | 0.05833 |    |
| 4894   | positive regulation of STAT cascade               | 0      | 210    | 773     | 675     | 925     | 14 |
| GO:000 |                                                   | 19/171 | 158/23 | 0.02368 | 0.08540 | 0.05833 |    |
| 2244   | hematopoietic progenitor cell differentiation     | 0      | 210    | 932     | 675     | 925     | 19 |
| GO:005 | negative regulation of immune response            | 19/171 | 158/23 | 0.02368 | 0.08540 | 0.05833 | 19 |

|        |                                                                                 |        |        |         |         |         |    |
|--------|---------------------------------------------------------------------------------|--------|--------|---------|---------|---------|----|
| 0777   |                                                                                 | 0      | 210    | 932     | 675     | 925     |    |
| GO:000 |                                                                                 |        | 31/232 | 0.02369 | 0.08540 | 0.05833 |    |
| 1832   | blastocyst growth                                                               | 6/1710 | 10     | 851     | 675     | 925     | 6  |
| GO:003 |                                                                                 |        | 31/232 | 0.02369 | 0.08540 | 0.05833 |    |
| 2967   | positive regulation of collagen biosynthetic process                            | 6/1710 | 10     | 851     | 675     | 925     | 6  |
| GO:005 |                                                                                 |        | 31/232 | 0.02369 | 0.08540 | 0.05833 |    |
| 1491   | positive regulation of filopodium assembly                                      | 6/1710 | 10     | 851     | 675     | 925     | 6  |
| GO:190 |                                                                                 |        | 31/232 | 0.02369 | 0.08540 | 0.05833 |    |
| 3393   | positive regulation of adherens junction organization                           | 6/1710 | 10     | 851     | 675     | 925     | 6  |
| GO:002 |                                                                                 | 25/171 | 223/23 | 0.02371 | 0.08540 | 0.05833 |    |
| 2618   | ribonucleoprotein complex assembly                                              | 0      | 210    | 104     | 675     | 925     | 25 |
| GO:000 |                                                                                 |        | 23/232 | 0.02375 | 0.08540 | 0.05833 |    |
| 1911   | negative regulation of leukocyte mediated cytotoxicity                          | 5/1710 | 10     | 659     | 675     | 925     | 5  |
| GO:000 |                                                                                 |        | 23/232 | 0.02375 | 0.08540 | 0.05833 |    |
| 2320   | lymphoid progenitor cell differentiation                                        | 5/1710 | 10     | 659     | 675     | 925     | 5  |
| GO:000 |                                                                                 |        | 23/232 | 0.02375 | 0.08540 | 0.05833 |    |
| 6837   | serotonin transport                                                             | 5/1710 | 10     | 659     | 675     | 925     | 5  |
| GO:000 |                                                                                 |        | 23/232 | 0.02375 | 0.08540 | 0.05833 |    |
| 7020   | microtubule nucleation                                                          | 5/1710 | 10     | 659     | 675     | 925     | 5  |
| GO:003 |                                                                                 |        | 23/232 | 0.02375 | 0.08540 | 0.05833 |    |
| 9528   | cytoplasmic pattern recognition receptor signaling pathway in response to virus | 5/1710 | 10     | 659     | 675     | 925     | 5  |
| GO:004 |                                                                                 |        | 23/232 | 0.02375 | 0.08540 | 0.05833 |    |
| 8333   | mesodermal cell differentiation                                                 | 5/1710 | 10     | 659     | 675     | 925     | 5  |
| GO:009 |                                                                                 |        | 23/232 | 0.02375 | 0.08540 | 0.05833 |    |
| 0190   | positive regulation of branching involved in ureteric bud morphogenesis         | 5/1710 | 10     | 659     | 675     | 925     | 5  |
| GO:009 | mannosylation                                                                   | 5/1710 | 23/232 | 0.02375 | 0.08540 | 0.05833 | 5  |

|        |                                                             |        |        |         |         |         |
|--------|-------------------------------------------------------------|--------|--------|---------|---------|---------|
| 7502   |                                                             | 10     | 659    | 675     | 925     |         |
| GO:005 |                                                             | 10/171 | 67/232 | 0.02422 | 0.08705 | 0.05946 |
| 0710   | negative regulation of cytokine secretion                   | 0      | 10     | 909     | 188     | 3       |
| GO:003 |                                                             | 37/171 | 359/23 | 0.02435 | 0.08745 | 0.05974 |
| 2496   | response to lipopolysaccharide                              | 0      | 210    | 712     | 81      | 047     |
| GO:005 |                                                             | 18/171 | 148/23 | 0.02453 | 0.08800 | 0.06011 |
| 0657   | nucleic acid transport                                      | 0      | 210    | 968     | 539     | 432     |
| GO:005 |                                                             | 18/171 | 148/23 | 0.02453 | 0.08800 | 0.06011 |
| 0658   | RNA transport                                               | 0      | 210    | 968     | 539     | 432     |
| GO:000 |                                                             | 15/171 | 117/23 | 0.02497 | 0.08936 | 0.06104 |
| 7498   | mesoderm development                                        | 0      | 210    | 854     | 406     | 239     |
| GO:000 |                                                             | 33/171 | 314/23 | 0.02510 | 0.08936 | 0.06104 |
| 6066   | alcohol metabolic process                                   | 0      | 210    | 926     | 406     | 239     |
| GO:001 |                                                             | 11/171 | 77/232 | 0.02511 | 0.08936 | 0.06104 |
| 4855   | striated muscle cell proliferation                          | 0      | 10     | 013     | 406     | 239     |
| GO:007 |                                                             | 11/171 | 77/232 | 0.02511 | 0.08936 | 0.06104 |
| 1347   | cellular response to interleukin-1                          | 0      | 10     | 013     | 406     | 239     |
| GO:007 |                                                             | 11/171 | 77/232 | 0.02511 | 0.08936 | 0.06104 |
| 2332   | intrinsic apoptotic signaling pathway by p53 class mediator | 0      | 10     | 013     | 406     | 239     |
| GO:190 |                                                             | 11/171 | 77/232 | 0.02511 | 0.08936 | 0.06104 |
| 5897   | regulation of response to endoplasmic reticulum stress      | 0      | 10     | 013     | 406     | 239     |
| GO:000 |                                                             |        | 58/232 | 0.02519 | 0.08936 | 0.06104 |
| 7164   | establishment of tissue polarity                            | 9/1710 | 10     | 387     | 406     | 239     |
| GO:001 |                                                             |        | 58/232 | 0.02519 | 0.08936 | 0.06104 |
| 5909   | long-chain fatty acid transport                             | 9/1710 | 10     | 387     | 406     | 239     |
| GO:003 | entry into host cell                                        | 9/1710 | 58/232 | 0.02519 | 0.08936 | 0.06104 |



|        |                                                                     |        |        |         |         |         |   |
|--------|---------------------------------------------------------------------|--------|--------|---------|---------|---------|---|
| 0260   |                                                                     |        | 10     | 387     | 406     | 239     |   |
| GO:003 |                                                                     |        | 58/232 | 0.02519 | 0.08936 | 0.06104 |   |
| 2835   | glomerulus development                                              | 9/1710 | 10     | 387     | 406     | 239     | 9 |
| GO:004 |                                                                     |        | 58/232 | 0.02519 | 0.08936 | 0.06104 |   |
| 3954   | cellular component maintenance                                      | 9/1710 | 10     | 387     | 406     | 239     | 9 |
| GO:004 |                                                                     |        | 58/232 | 0.02519 | 0.08936 | 0.06104 |   |
| 4409   | entry into host                                                     | 9/1710 | 10     | 387     | 406     | 239     | 9 |
| GO:005 |                                                                     |        | 58/232 | 0.02519 | 0.08936 | 0.06104 |   |
| 1187   | cofactor catabolic process                                          | 9/1710 | 10     | 387     | 406     | 239     | 9 |
| GO:005 |                                                                     |        | 58/232 | 0.02519 | 0.08936 | 0.06104 |   |
| 1806   | entry into cell of other organism involved in symbiotic interaction | 9/1710 | 10     | 387     | 406     | 239     | 9 |
| GO:005 |                                                                     |        | 58/232 | 0.02519 | 0.08936 | 0.06104 |   |
| 1828   | entry into other organism involved in symbiotic interaction         | 9/1710 | 10     | 387     | 406     | 239     | 9 |
| GO:007 |                                                                     |        | 58/232 | 0.02519 | 0.08936 | 0.06104 |   |
| 2678   | T cell migration                                                    | 9/1710 | 10     | 387     | 406     | 239     | 9 |
| GO:009 |                                                                     |        | 58/232 | 0.02519 | 0.08936 | 0.06104 |   |
| 8900   | regulation of action potential                                      | 9/1710 | 10     | 387     | 406     | 239     | 9 |
| GO:009 |                                                                     |        | 58/232 | 0.02519 | 0.08936 | 0.06104 |   |
| 8930   | axonal transport                                                    | 9/1710 | 10     | 387     | 406     | 239     | 9 |
| GO:000 |                                                                     |        | 40/232 | 0.02537 | 0.08946 | 0.06111 |   |
| 1881   | receptor recycling                                                  | 7/1710 | 10     | 26      | 414     | 075     | 7 |
| GO:000 |                                                                     |        | 40/232 | 0.02537 | 0.08946 | 0.06111 |   |
| 2686   | negative regulation of leukocyte migration                          | 7/1710 | 10     | 26      | 414     | 075     | 7 |
| GO:000 |                                                                     |        | 40/232 | 0.02537 | 0.08946 | 0.06111 |   |
| 3009   | skeletal muscle contraction                                         | 7/1710 | 10     | 26      | 414     | 075     | 7 |
| GO:004 | multi-organism cellular process                                     | 7/1710 | 40/232 | 0.02537 | 0.08946 | 0.06111 | 7 |

|        |                                                       |        |        |         |         |         |         |
|--------|-------------------------------------------------------|--------|--------|---------|---------|---------|---------|
| 4764   |                                                       |        | 10     | 26      | 414     | 075     |         |
| GO:007 |                                                       |        | 40/232 | 0.02537 | 0.08946 | 0.06111 |         |
| 0884   | regulation of calcineurin-NFAT signaling cascade      | 7/1710 | 10     | 26      | 414     | 075     | 7       |
| GO:009 |                                                       |        | 40/232 | 0.02537 | 0.08946 | 0.06111 |         |
| 8801   | regulation of renal system process                    | 7/1710 | 10     | 26      | 414     | 075     | 7       |
| GO:010 |                                                       |        | 40/232 | 0.02537 | 0.08946 | 0.06111 |         |
| 6056   | regulation of calcineurin-mediated signaling          | 7/1710 | 10     | 26      | 414     | 075     | 7       |
| GO:011 |                                                       |        | 40/232 | 0.02537 | 0.08946 | 0.06111 |         |
| 0111   | negative regulation of animal organ morphogenesis     | 7/1710 | 10     | 26      | 414     | 075     | 7       |
| GO:190 |                                                       |        | 40/232 | 0.02537 | 0.08946 | 0.06111 |         |
| 5332   | positive regulation of morphogenesis of an epithelium | 7/1710 | 10     | 26      | 414     | 075     | 7       |
| GO:000 |                                                       |        | 14/171 | 107/23  | 0.02537 | 0.08946 | 0.06111 |
| 7043   | cell-cell junction assembly                           | 0      | 210    | 523     | 414     | 075     | 14      |
| GO:000 |                                                       |        | 12/171 | 87/232  | 0.02552 | 0.08992 | 0.06142 |
| 2690   | positive regulation of leukocyte chemotaxis           | 0      | 10     | 016     | 086     | 273     | 12      |
| GO:000 |                                                       |        | 27/171 | 247/23  | 0.02583 | 0.09069 | 0.06195 |
| 2064   | epithelial cell development                           | 0      | 210    | 773     | 824     | 373     | 27      |
| GO:001 |                                                       |        | 21/171 | 181/23  | 0.02584 | 0.09069 | 0.06195 |
| 5931   | nucleobase-containing compound transport              | 0      | 210    | 601     | 824     | 373     | 21      |
| GO:003 |                                                       |        | 31/171 | 292/23  | 0.02585 | 0.09069 | 0.06195 |
| 0111   | regulation of Wnt signaling pathway                   | 0      | 210    | 433     | 824     | 373     | 31      |
| GO:007 |                                                       |        | 26/171 | 236/23  | 0.02600 | 0.09069 | 0.06195 |
| 1826   | ribonucleoprotein complex subunit organization        | 0      | 210    | 091     | 824     | 373     | 26      |
| GO:000 |                                                       |        | 18/171 | 149/23  | 0.02605 | 0.09069 | 0.06195 |
| 1824   | blastocyst development                                | 0      | 210    | 941     | 824     | 373     | 18      |
| GO:000 | macrophage activation involved in immune response     | 4/1710 | 16/232 | 0.02611 | 0.09069 | 0.06195 | 4       |

|        |                                                                     |        |        |         |         |         |   |
|--------|---------------------------------------------------------------------|--------|--------|---------|---------|---------|---|
| 2281   |                                                                     |        | 10     | 339     | 824     | 373     |   |
| GO:000 |                                                                     |        | 16/232 | 0.02611 | 0.09069 | 0.06195 |   |
| 9081   | branched-chain amino acid metabolic process                         | 4/1710 | 10     | 339     | 824     | 373     | 4 |
| GO:000 |                                                                     |        | 16/232 | 0.02611 | 0.09069 | 0.06195 |   |
| 9147   | pyrimidine nucleoside triphosphate metabolic process                | 4/1710 | 10     | 339     | 824     | 373     | 4 |
| GO:001 |                                                                     |        | 16/232 | 0.02611 | 0.09069 | 0.06195 |   |
| 4067   | negative regulation of phosphatidylinositol 3-kinase signaling      | 4/1710 | 10     | 339     | 824     | 373     | 4 |
| GO:001 |                                                                     |        | 16/232 | 0.02611 | 0.09069 | 0.06195 |   |
| 4733   | regulation of skeletal muscle adaptation                            | 4/1710 | 10     | 339     | 824     | 373     | 4 |
| GO:001 |                                                                     |        | 16/232 | 0.02611 | 0.09069 | 0.06195 |   |
| 4856   | skeletal muscle cell proliferation                                  | 4/1710 | 10     | 339     | 824     | 373     | 4 |
| GO:004 |                                                                     |        | 16/232 | 0.02611 | 0.09069 | 0.06195 |   |
| 2228   | interleukin-8 biosynthetic process                                  | 4/1710 | 10     | 339     | 824     | 373     | 4 |
| GO:004 |                                                                     |        | 16/232 | 0.02611 | 0.09069 | 0.06195 |   |
| 2772   | DNA damage response, signal transduction resulting in transcription | 4/1710 | 10     | 339     | 824     | 373     | 4 |
| GO:005 |                                                                     |        | 16/232 | 0.02611 | 0.09069 | 0.06195 |   |
| 1386   | regulation of neurotrophin TRK receptor signaling pathway           | 4/1710 | 10     | 339     | 824     | 373     | 4 |
| GO:006 |                                                                     |        | 16/232 | 0.02611 | 0.09069 | 0.06195 |   |
| 0100   | positive regulation of phagocytosis, engulfment                     | 4/1710 | 10     | 339     | 824     | 373     | 4 |
| GO:006 |                                                                     |        | 16/232 | 0.02611 | 0.09069 | 0.06195 |   |
| 0314   | regulation of ryanodine-sensitive calcium-release channel activity  | 4/1710 | 10     | 339     | 824     | 373     | 4 |
| GO:007 |                                                                     |        | 16/232 | 0.02611 | 0.09069 | 0.06195 |   |
| 0200   | establishment of protein localization to telomere                   | 4/1710 | 10     | 339     | 824     | 373     | 4 |
| GO:007 |                                                                     |        | 16/232 | 0.02611 | 0.09069 | 0.06195 |   |
| 1379   | cellular response to prostaglandin stimulus                         | 4/1710 | 10     | 339     | 824     | 373     | 4 |
| GO:009 | regulation of brown fat cell differentiation                        | 4/1710 | 16/232 | 0.02611 | 0.09069 | 0.06195 | 4 |

|        |                                                                                     |        |        |         |         |         |         |
|--------|-------------------------------------------------------------------------------------|--------|--------|---------|---------|---------|---------|
| 0335   |                                                                                     |        | 10     | 339     | 824     | 373     |         |
| GO:009 | regulation of neurotransmitter receptor localization to postsynaptic specialization |        | 16/232 | 0.02611 | 0.09069 | 0.06195 |         |
| 8696   | membrane                                                                            | 4/1710 | 10     | 339     | 824     | 373     | 4       |
| GO:190 |                                                                                     |        | 16/232 | 0.02611 | 0.09069 | 0.06195 |         |
| 0119   | positive regulation of execution phase of apoptosis                                 | 4/1710 | 10     | 339     | 824     | 373     | 4       |
| GO:190 |                                                                                     |        | 16/232 | 0.02611 | 0.09069 | 0.06195 |         |
| 1881   | positive regulation of protein depolymerization                                     | 4/1710 | 10     | 339     | 824     | 373     | 4       |
| GO:190 |                                                                                     |        | 16/232 | 0.02611 | 0.09069 | 0.06195 |         |
| 5155   | positive regulation of membrane invagination                                        | 4/1710 | 10     | 339     | 824     | 373     | 4       |
| GO:190 |                                                                                     |        | 16/232 | 0.02611 | 0.09069 | 0.06195 |         |
| 5564   | positive regulation of vascular endothelial cell proliferation                      | 4/1710 | 10     | 339     | 824     | 373     | 4       |
| GO:000 |                                                                                     |        | 35/171 | 338/23  | 0.02625 | 0.09114 | 0.06225 |
| 9100   | glycoprotein metabolic process                                                      | 0      | 210    | 701     | 287     | 745     | 35      |
| GO:000 |                                                                                     |        | 29/171 | 270/23  | 0.02650 | 0.09195 | 0.06281 |
| 9615   | response to virus                                                                   | 0      | 210    | 804     | 96      | 534     | 29      |
| GO:005 |                                                                                     |        | 10/171 | 68/232  | 0.02659 | 0.09215 | 0.06295 |
| 5081   | anion homeostasis                                                                   | 0      | 10     | 661     | 741     | 046     | 10      |
| GO:200 |                                                                                     |        | 10/171 | 68/232  | 0.02659 | 0.09215 | 0.06295 |
| 1244   | positive regulation of intrinsic apoptotic signaling pathway                        | 0      | 10     | 661     | 741     | 046     | 10      |
| GO:000 |                                                                                     |        | 38/171 | 373/23  | 0.02668 | 0.09239 | 0.06311 |
| 3002   | regionalization                                                                     | 0      | 210    | 137     | 629     | 363     | 38      |
| GO:004 |                                                                                     |        | 41/171 | 408/23  | 0.02683 | 0.09287 | 0.06344 |
| 4419   | interspecies interaction between organisms                                          | 0      | 210    | 537     | 454     | 031     | 41      |
| GO:000 |                                                                                     |        | 42/171 | 420/23  | 0.02714 | 0.09388 | 0.06413 |
| 2697   | regulation of immune effector process                                               | 0      | 210    | 34      | 5       | 053     | 42      |
| GO:000 | regulation of cytokine-mediated signaling pathway                                   | 14/171 | 108/23 | 0.02725 | 0.09417 | 0.06432 | 14      |

|        |                                                        |        |        |         |         |         |    |
|--------|--------------------------------------------------------|--------|--------|---------|---------|---------|----|
| 1959   |                                                        | 0      | 210    | 002     | 456     | 832     |    |
| GO:000 |                                                        | 11/171 | 78/232 | 0.02735 | 0.09417 | 0.06432 |    |
| 2260   | lymphocyte homeostasis                                 | 0      | 10     | 622     | 456     | 832     | 11 |
| GO:000 |                                                        |        | 32/232 | 0.02740 | 0.09417 | 0.06432 |    |
| 3016   | respiratory system process                             | 6/1710 | 10     | 444     | 456     | 832     | 6  |
| GO:000 |                                                        |        | 32/232 | 0.02740 | 0.09417 | 0.06432 |    |
| 7097   | nuclear migration                                      | 6/1710 | 10     | 444     | 456     | 832     | 6  |
| GO:004 |                                                        |        | 32/232 | 0.02740 | 0.09417 | 0.06432 |    |
| 3243   | positive regulation of protein complex disassembly     | 6/1710 | 10     | 444     | 456     | 832     | 6  |
| GO:004 |                                                        |        | 32/232 | 0.02740 | 0.09417 | 0.06432 |    |
| 5672   | positive regulation of osteoclast differentiation      | 6/1710 | 10     | 444     | 456     | 832     | 6  |
| GO:004 |                                                        |        | 32/232 | 0.02740 | 0.09417 | 0.06432 |    |
| 6466   | membrane lipid catabolic process                       | 6/1710 | 10     | 444     | 456     | 832     | 6  |
| GO:004 |                                                        |        | 32/232 | 0.02740 | 0.09417 | 0.06432 |    |
| 8048   | embryonic eye morphogenesis                            | 6/1710 | 10     | 444     | 456     | 832     | 6  |
| GO:005 |                                                        |        | 32/232 | 0.02740 | 0.09417 | 0.06432 |    |
| 1150   | regulation of smooth muscle cell differentiation       | 6/1710 | 10     | 444     | 456     | 832     | 6  |
| GO:006 |                                                        |        | 32/232 | 0.02740 | 0.09417 | 0.06432 |    |
| 0306   | regulation of membrane repolarization                  | 6/1710 | 10     | 444     | 456     | 832     | 6  |
| GO:190 |                                                        |        | 32/232 | 0.02740 | 0.09417 | 0.06432 |    |
| 0181   | negative regulation of protein localization to nucleus | 6/1710 | 10     | 444     | 456     | 832     | 6  |
| GO:007 |                                                        | 13/171 | 98/232 | 0.02757 | 0.09470 | 0.06468 |    |
| 2080   | nephron tubule development                             | 0      | 10     | 4       | 152     | 827     | 13 |
| GO:000 |                                                        | 12/171 | 88/232 | 0.02764 | 0.09473 | 0.06471 |    |
| 9116   | nucleoside metabolic process                           | 0      | 10     | 04      | 638     | 209     | 12 |
| GO:003 | regulation of chemokine production                     | 12/171 | 88/232 | 0.02764 | 0.09473 | 0.06471 | 12 |

|        |                                                                                   |        |        |         |         |         |    |
|--------|-----------------------------------------------------------------------------------|--------|--------|---------|---------|---------|----|
| 2642   |                                                                                   | 0      | 10     | 04      | 638     | 209     |    |
| GO:003 |                                                                                   | 18/171 | 150/23 | 0.02764 | 0.09473 | 0.06471 |    |
| 4614   | cellular response to reactive oxygen species                                      | 0      | 210    | 901     | 638     | 209     | 18 |
| GO:005 |                                                                                   | 18/171 | 150/23 | 0.02764 | 0.09473 | 0.06471 |    |
| 0715   | positive regulation of cytokine secretion                                         | 0      | 210    | 901     | 638     | 209     | 18 |
| GO:001 |                                                                                   |        | 59/232 | 0.02785 | 0.09532 | 0.06511 |    |
| 5807   | L-amino acid transport                                                            | 9/1710 | 10     | 307     | 376     | 331     | 9  |
| GO:005 |                                                                                   |        | 59/232 | 0.02785 | 0.09532 | 0.06511 |    |
| 1148   | negative regulation of muscle cell differentiation                                | 9/1710 | 10     | 307     | 376     | 331     | 9  |
| GO:004 |                                                                                   | 31/171 | 294/23 | 0.02807 | 0.09602 | 0.06559 |    |
| 2254   | ribosome biogenesis                                                               | 0      | 210    | 456     | 553     | 267     | 31 |
| GO:000 |                                                                                   |        | 24/232 | 0.02823 | 0.09624 | 0.06574 |    |
| 6221   | pyrimidine nucleotide biosynthetic process                                        | 5/1710 | 10     | 852     | 821     | 478     | 5  |
| GO:003 |                                                                                   |        | 24/232 | 0.02823 | 0.09624 | 0.06574 |    |
| 2878   | regulation of establishment or maintenance of cell polarity                       | 5/1710 | 10     | 852     | 821     | 478     | 5  |
| GO:004 |                                                                                   |        | 24/232 | 0.02823 | 0.09624 | 0.06574 |    |
| 2572   | retinol metabolic process                                                         | 5/1710 | 10     | 852     | 821     | 478     | 5  |
| GO:004 |                                                                                   |        | 24/232 | 0.02823 | 0.09624 | 0.06574 |    |
| 3496   | regulation of protein homodimerization activity                                   | 5/1710 | 10     | 852     | 821     | 478     | 5  |
| GO:004 |                                                                                   |        | 24/232 | 0.02823 | 0.09624 | 0.06574 |    |
| 5723   | positive regulation of fatty acid biosynthetic process                            | 5/1710 | 10     | 852     | 821     | 478     | 5  |
| GO:009 |                                                                                   |        | 24/232 | 0.02823 | 0.09624 | 0.06574 |    |
| 9623   | regulation of cardiac muscle cell membrane repolarization                         | 5/1710 | 10     | 852     | 821     | 478     | 5  |
| GO:004 | positive regulation of cysteine-type endopeptidase activity involved in apoptotic | 15/171 | 119/23 | 0.02858 | 0.09738 | 0.06651 |    |
| 3280   | process                                                                           | 0      | 210    | 805     | 272     | 974     | 15 |
| GO:006 | adipose tissue development                                                        | 8/1710 | 50/232 | 0.02867 | 0.09747 | 0.06658 | 8  |

|        |                                                             |        |        |         |         |         |         |
|--------|-------------------------------------------------------------|--------|--------|---------|---------|---------|---------|
| 0612   |                                                             |        | 10     | 274     | 319     | 154     |         |
| GO:190 |                                                             |        | 50/232 | 0.02867 | 0.09747 | 0.06658 |         |
| 0047   | negative regulation of hemostasis                           | 8/1710 | 10     | 274     | 319     | 154     | 8       |
| GO:000 |                                                             |        | 41/232 | 0.02871 | 0.09747 | 0.06658 |         |
| 1937   | negative regulation of endothelial cell proliferation       | 7/1710 | 10     | 471     | 319     | 154     | 7       |
| GO:005 |                                                             |        | 41/232 | 0.02871 | 0.09747 | 0.06658 |         |
| 0856   | regulation of T cell receptor signaling pathway             | 7/1710 | 10     | 471     | 319     | 154     | 7       |
| GO:005 |                                                             |        | 41/232 | 0.02871 | 0.09747 | 0.06658 |         |
| 1154   | negative regulation of striated muscle cell differentiation | 7/1710 | 10     | 471     | 319     | 154     | 7       |
| GO:007 |                                                             |        | 41/232 | 0.02871 | 0.09747 | 0.06658 |         |
| 1364   | cellular response to epidermal growth factor stimulus       | 7/1710 | 10     | 471     | 319     | 154     | 7       |
| GO:200 |                                                             |        | 21/171 | 183/23  | 0.02873 | 0.09749 | 0.06659 |
| 1235   | positive regulation of apoptotic signaling pathway          | 0      | 210    | 912     | 939     | 943     | 21      |
| GO:001 |                                                             |        | 22/171 | 194/23  | 0.02885 | 0.09784 | 0.06683 |
| 6051   | carbohydrate biosynthetic process                           | 0      | 210    | 719     | 311     | 422     | 22      |
| GO:003 |                                                             |        | 10/171 | 69/232  | 0.02912 | 0.09869 | 0.06741 |
| 2637   | interleukin-8 production                                    | 0      | 10     | 482     | 329     | 495     | 10      |
| GO:190 |                                                             |        | 47/171 | 481/23  | 0.02919 | 0.09885 | 0.06752 |
| 1615   | organic hydroxy compound metabolic process                  | 0      | 210    | 055     | 865     | 791     | 47      |
| GO:003 |                                                             |        | 14/171 | 109/23  | 0.02922 | 0.09886 | 0.06752 |
| 2092   | positive regulation of protein binding                      | 0      | 210    | 489     | 033     | 906     | 14      |
| GO:007 |                                                             |        | 14/171 | 109/23  | 0.02922 | 0.09886 | 0.06752 |
| 2009   | nephron epithelium development                              | 0      | 210    | 489     | 033     | 906     | 14      |
| GO:005 |                                                             |        | 18/171 | 151/23  | 0.02931 | 0.09909 | 0.06768 |
| 1236   | establishment of RNA localization                           | 0      | 210    | 025     | 171     | 711     | 18      |
| GO:000 | mitochondrial matrix                                        | 73/173 | 264/23 | 1.479E- | 1.0441E | 7.8774E | 73      |

|        |                                          |        |        |         |         |         |    |
|--------|------------------------------------------|--------|--------|---------|---------|---------|----|
| 5759   |                                          | 7      | 436    | 23      | -20     | -21     |    |
| GO:000 |                                          | 91/173 | 433/23 | 5.7622E | 2.0341E | 1.5346E |    |
| 5743   | mitochondrial inner membrane             | 7      | 436    | -20     | -17     | -17     | 91 |
| GO:001 |                                          | 95/173 | 475/23 | 3.1029E | 7.3021E | 5.5089E |    |
| 9866   | organelle inner membrane                 | 7      | 436    | -19     | -17     | -17     | 95 |
| GO:009 |                                          | 63/173 | 263/23 | 4.2384E | 7.4809E | 5.6438E |    |
| 8798   | mitochondrial protein complex            | 7      | 436    | -17     | -15     | -15     | 63 |
| GO:004 |                                          | 53/173 | 226/23 | 3.3571E | 4.7402E | 3.5762E |    |
| 3292   | contractile fiber                        | 7      | 436    | -14     | -12     | -12     | 53 |
| GO:001 |                                          | 86/173 | 490/23 | 4.8611E | 5.7199E | 4.3153E |    |
| 5629   | actin cytoskeleton                       | 7      | 436    | -14     | -12     | -12     | 86 |
| GO:006 |                                          | 70/173 | 359/23 | 6.1456E | 6.1982E | 4.6762E |    |
| 2023   | collagen-containing extracellular matrix | 7      | 436    | -14     | -12     | -12     | 70 |
| GO:004 |                                          | 49/173 | 203/23 | 9.5752E | 8.4501E | 6.3751E |    |
| 4449   | contractile fiber part                   | 7      | 436    | -14     | -12     | -12     | 49 |
| GO:003 |                                          | 50/173 | 212/23 | 1.4065E | 1.1033E | 8.3238E |    |
| 0016   | myofibril                                | 7      | 436    | -13     | -11     | -12     | 50 |
| GO:003 |                                          | 46/173 | 189/23 | 3.9533E | 2.791E- | 2.1056E |    |
| 0017   | sarcomere                                | 7      | 436    | -13     | 11      | -11     | 46 |
| GO:003 |                                          | 38/173 | 142/23 | 1.9084E | 1.2248E | 9.2407E |    |
| 1674   | I band                                   | 7      | 436    | -12     | -10     | -11     | 38 |
| GO:000 |                                          | 28/173 | 86/234 | 9.1306E | 4.5573E | 3.4382E |    |
| 1725   | stress fiber                             | 7      | 36     | -12     | -10     | -10     | 28 |
| GO:009 |                                          | 28/173 | 86/234 | 9.1306E | 4.5573E | 3.4382E |    |
| 7517   | contractile actin filament bundle        | 7      | 36     | -12     | -10     | -10     | 28 |
| GO:000 | organellar ribosome                      | 29/173 | 92/234 | 9.6827E | 4.5573E | 3.4382E | 29 |



|        |                             |        |        |         |         |         |    |
|--------|-----------------------------|--------|--------|---------|---------|---------|----|
| 0313   |                             | 7      | 36     | -12     | -10     | -10     |    |
| GO:000 |                             | 29/173 | 92/234 | 9.6827E | 4.5573E | 3.4382E |    |
| 5761   | mitochondrial ribosome      | 7      | 36     | -12     | -10     | -10     | 29 |
| GO:003 |                             | 78/173 | 475/23 | 2.3122E | 1.0203E | 7.6973E |    |
| 1012   | extracellular matrix        | 7      | 436    | -11     | -09     | -10     | 78 |
| GO:004 |                             | 29/173 | 97/234 | 4.1585E | 1.727E- | 1.3029E |    |
| 2641   | actomyosin                  | 7      | 36     | -11     | 09      | -09     | 29 |
| GO:003 |                             | 28/173 | 95/234 | 1.3031E | 5.1112E | 3.8561E |    |
| 2432   | actin filament bundle       | 7      | 36     | -10     | -09     | -09     | 28 |
| GO:004 |                             | 38/173 | 163/23 | 1.6694E | 6.2032E | 4.6799E |    |
| 2383   | sarcolemma                  | 7      | 436    | -10     | -09     | -09     | 38 |
| GO:003 |                             | 33/173 | 130/23 | 2.4598E | 8.6831E | 6.5509E |    |
| 0018   | Z disc                      | 7      | 436    | -10     | -09     | -09     | 33 |
| GO:004 |                             | 43/173 | 216/23 | 2.172E- | 7.3019E | 5.5088E |    |
| 4455   | mitochondrial membrane part | 7      | 436    | 09      | -08     | -08     | 43 |
| GO:000 |                             | 32/173 | 143/23 | 1.3121E | 4.0277E | 3.0386E |    |
| 5777   | peroxisome                  | 7      | 436    | -08     | -07     | -07     | 32 |
| GO:004 |                             | 32/173 | 143/23 | 1.3121E | 4.0277E | 3.0386E |    |
| 2579   | microbody                   | 7      | 436    | -08     | -07     | -07     | 32 |
| GO:004 |                             | 41/173 | 213/23 | 1.4075E | 4.1403E | 3.1236E |    |
| 3209   | myelin sheath               | 7      | 436    | -08     | -07     | -07     | 41 |
| GO:000 |                             | 17/173 | 47/234 | 1.8249E | 4.9552E | 3.7384E |    |
| 9295   | nucleoid                    | 7      | 36     | -08     | -07     | -07     | 17 |
| GO:004 |                             | 17/173 | 47/234 | 1.8249E | 4.9552E | 3.7384E |    |
| 2645   | mitochondrial nucleoid      | 7      | 36     | -08     | -07     | -07     | 17 |
| GO:000 | actin filament              | 29/173 | 124/23 | 2.1919E | 5.7313E | 4.3239E | 29 |

|        |                                               |        |        |         |         |         |    |
|--------|-----------------------------------------------|--------|--------|---------|---------|---------|----|
| 5884   |                                               | 7      | 436    | -08     | -07     | -07     |    |
| GO:000 |                                               | 19/173 | 60/234 | 3.2909E | 8.0118E | 6.0444E |    |
| 0315   | organellar large ribosomal subunit            | 7      | 36     | -08     | -07     | -07     | 19 |
| GO:000 |                                               | 19/173 | 60/234 | 3.2909E | 8.0118E | 6.0444E |    |
| 5762   | mitochondrial large ribosomal subunit         | 7      | 36     | -08     | -07     | -07     | 19 |
| GO:000 |                                               | 45/173 | 265/23 | 1.4248E | 3.353E- | 2.5296E |    |
| 5840   | ribosome                                      | 7      | 436    | -07     | 06      | -06     | 45 |
| GO:003 |                                               | 22/173 | 88/234 | 3.1094E | 7.0813E | 5.3424E |    |
| 1970   | organelle envelope lumen                      | 7      | 36     | -07     | -06     | -06     | 22 |
| GO:000 |                                               | 32/173 | 168/23 | 6.7192E | 1.4824E | 1.1184E |    |
| 5741   | mitochondrial outer membrane                  | 7      | 436    | -07     | -05     | -05     | 32 |
| GO:199 |                                               | 24/173 | 108/23 | 9.4963E | 2.0316E | 1.5327E |    |
| 0204   | oxidoreductase complex                        | 7      | 436    | -07     | -05     | -05     | 24 |
| GO:009 |                                               | 19/173 | 73/234 | 1.0099E | 2.097E- | 1.5821E |    |
| 8573   | intrinsic component of mitochondrial membrane | 7      | 36     | -06     | 05      | -05     | 19 |
| GO:001 |                                               | 33/173 | 185/23 | 2.0937E | 4.106E- | 3.0977E |    |
| 9867   | outer membrane                                | 7      | 436    | -06     | 05      | -05     | 33 |
| GO:003 |                                               | 33/173 | 185/23 | 2.0937E | 4.106E- | 3.0977E |    |
| 1968   | organelle outer membrane                      | 7      | 436    | -06     | 05      | -05     | 33 |
| GO:001 |                                               | 20/173 | 84/234 | 2.4161E | 4.6102E | 3.4781E |    |
| 6528   | sarcoplasm                                    | 7      | 36     | -06     | -05     | -05     | 20 |
| GO:004 |                                               | 35/173 | 208/23 | 4.1337E | 7.6801E | 5.7941E |    |
| 4448   | cell cortex part                              | 7      | 436    | -06     | -05     | -05     | 35 |
| GO:004 |                                               | 37/173 | 230/23 | 6.5293E | 0.00011 | 8.8431E |    |
| 4391   | ribosomal subunit                             | 7      | 436    | -06     | 722     | -05     | 37 |
| GO:000 | mitochondrial intermembrane space             | 18/173 | 75/234 | 6.7517E | 0.00011 | 8.8431E | 18 |

|        |                                              |        |        |         |         |         |    |
|--------|----------------------------------------------|--------|--------|---------|---------|---------|----|
| 5758   |                                              | 7      | 36     | -06     | 722     | -05     |    |
| GO:009 |                                              | 25/173 | 128/23 | 6.8071E | 0.00011 | 8.8431E |    |
| 8800   | inner mitochondrial membrane protein complex | 7      | 436    | -06     | 722     | -05     | 25 |
| GO:004 |                                              | 64/173 | 491/23 | 7.318E- | 0.00012 | 9.214E- |    |
| 4431   | Golgi apparatus part                         | 7      | 436    | 06      | 213     | 05      | 64 |
| GO:003 |                                              | 47/173 | 324/23 | 7.4386E | 0.00012 | 9.214E- |    |
| 0133   | transport vesicle                            | 7      | 436    | -06     | 213     | 05      | 47 |
| GO:004 |                                              | 19/173 | 83/234 | 7.9401E | 0.00012 | 9.49E-0 |    |
| 4291   | cell-cell contact zone                       | 7      | 36     | -06     | 579     | 5       | 19 |
| GO:001 |                                              | 16/173 | 62/234 | 8.0177E | 0.00012 | 9.49E-0 |    |
| 4704   | intercalated disc                            | 7      | 36     | -06     | 579     | 5       | 16 |
| GO:000 |                                              | 55/173 | 407/23 | 1.1153E | 0.00017 | 0.00012 |    |
| 5635   | nuclear envelope                             | 7      | 436    | -05     | 118     | 914     | 55 |
| GO:003 |                                              | 34/173 | 209/23 | 1.1912E | 0.00017 | 0.00013 |    |
| 5770   | ribonucleoprotein granule                    | 7      | 436    | -05     | 893     | 499     | 34 |
| GO:003 |                                              | 17/173 | 71/234 | 1.2494E | 0.00018 | 0.00013 |    |
| 2592   | integral component of mitochondrial membrane | 7      | 36     | -05     | 377     | 864     | 17 |
| GO:003 |                                              | 38/173 | 249/23 | 1.7083E | 0.00024 | 0.00018 |    |
| 1300   | intrinsic component of organelle membrane    | 7      | 436    | -05     | 613     | 569     | 38 |
| GO:004 |                                              |        | 14/234 | 2.6165E | 0.00036 | 0.00027 |    |
| 5239   | tricarboxylic acid cycle enzyme complex      | 7/1737 | 36     | -05     | 945     | 873     | 7  |
| GO:001 |                                              | 17/173 | 75/234 | 2.6957E | 0.00037 | 0.00028 |    |
| 6529   | sarcoplasmic reticulum                       | 7      | 36     | -05     | 317     | 153     | 17 |
| GO:003 |                                              | 24/173 | 131/23 | 3.1358E | 0.00042 | 0.00032 |    |
| 0863   | cortical cytoskeleton                        | 7      | 436    | -05     | 574     | 12      | 24 |
| GO:000 | basement membrane                            | 21/173 | 107/23 | 3.3448E | 0.00044 | 0.00033 | 21 |

|        |                                                     |        |        |         |         |         |    |
|--------|-----------------------------------------------------|--------|--------|---------|---------|---------|----|
| 5604   |                                                     | 7      | 436    | -05     | 556     | 614     |    |
| GO:000 |                                                     | 27/173 | 158/23 | 3.7716E | 0.00048 | 0.00036 |    |
| 5924   | cell-substrate adherens junction                    | 7      | 436    | -05     | 867     | 867     | 27 |
| GO:001 |                                                     | 11/173 | 36/234 | 3.8069E | 0.00048 | 0.00036 |    |
| 6592   | mediator complex                                    | 7      | 36     | -05     | 867     | 867     | 11 |
| GO:000 |                                                     | 42/173 | 297/23 | 4.0841E | 0.00051 | 0.00038 |    |
| 5912   | adherens junction                                   | 7      | 436    | -05     | 489     | 845     | 42 |
| GO:003 |                                                     | 12/173 | 43/234 | 4.657E- | 0.00057 | 0.00043 |    |
| 1304   | intrinsic component of mitochondrial inner membrane | 7      | 36     | 05      | 681     | 517     | 12 |
| GO:000 |                                                     | 26/173 | 152/23 | 5.1196E | 0.00062 | 0.00047 |    |
| 5925   | focal adhesion                                      | 7      | 436    | -05     | 318     | 015     | 26 |
| GO:004 |                                                     | 14/173 | 57/234 | 5.3103E | 0.00062 | 0.00047 |    |
| 4438   | microbody part                                      | 7      | 36     | -05     | 484     | 14      | 14 |
| GO:004 |                                                     | 14/173 | 57/234 | 5.3103E | 0.00062 | 0.00047 |    |
| 4439   | peroxisomal part                                    | 7      | 36     | -05     | 484     | 14      | 14 |
| GO:007 |                                                     | 43/173 | 311/23 | 5.6929E | 0.00065 | 0.00049 |    |
| 0161   | anchoring junction                                  | 7      | 436    | -05     | 888     | 709     | 43 |
| GO:000 |                                                     | 43/173 | 312/23 | 6.1392E | 0.00069 | 0.00052 |    |
| 5938   | cell cortex                                         | 7      | 436    | -05     | 907     | 74      | 43 |
| GO:001 |                                                     |        | 16/234 | 7.6398E | 0.00085 | 0.00064 |    |
| 6460   | myosin II complex                                   | 7/1737 | 36     | -05     | 615     | 591     | 7  |
| GO:003 |                                                     | 27/173 | 165/23 | 8.1654E | 0.00090 | 0.00067 |    |
| 0055   | cell-substrate junction                             | 7      | 436    | -05     | 075     | 955     | 27 |
| GO:009 |                                                     | 55/173 | 438/23 | 8.6874E | 0.00094 | 0.00071 |    |
| 8791   | Golgi subcompartment                                | 7      | 436    | -05     | 359     | 188     | 55 |
| GO:003 | integral component of organelle membrane            | 33/173 | 222/23 | 0.00010 | 0.00107 | 0.00080 | 33 |

|        |                                                    |        |        |         |         |         |    |
|--------|----------------------------------------------------|--------|--------|---------|---------|---------|----|
| 1301   |                                                    | 7      | 436    | 011     | 088     | 791     |    |
| GO:000 |                                                    | 54/173 | 431/23 | 0.00010 | 0.00112 | 0.00084 |    |
| 5764   | lysosome                                           | 7      | 436    | 632     | 029     | 518     | 54 |
| GO:000 |                                                    | 54/173 | 432/23 | 0.00011 | 0.00117 | 0.00088 |    |
| 0323   | lytic vacuole                                      | 7      | 436    | 294     | 263     | 467     | 54 |
| GO:003 |                                                    | 30/173 | 198/23 | 0.00014 | 0.00146 | 0.00110 |    |
| 6464   | cytoplasmic ribonucleoprotein granule              | 7      | 436    | 358     | 913     | 837     | 30 |
| GO:003 |                                                    | 15/173 | 70/234 | 0.00015 | 0.00156 | 0.00118 |    |
| 0315   | T-tubule                                           | 7      | 36     | 517     | 501     | 07      | 15 |
| GO:000 |                                                    | 11/173 | 42/234 | 0.00017 | 0.00173 | 0.00130 |    |
| 5778   | peroxisomal membrane                               | 7      | 36     | 944     | 536     | 922     | 11 |
| GO:003 |                                                    | 11/173 | 42/234 | 0.00017 | 0.00173 | 0.00130 |    |
| 1305   | integral component of mitochondrial inner membrane | 7      | 36     | 944     | 536     | 922     | 11 |
| GO:003 |                                                    | 11/173 | 42/234 | 0.00017 | 0.00173 | 0.00130 |    |
| 1903   | microbody membrane                                 | 7      | 36     | 944     | 536     | 922     | 11 |
| GO:000 |                                                    | 52/173 | 421/23 | 0.00020 | 0.00192 | 0.00145 |    |
| 5667   | transcription factor complex                       | 7      | 436    | 176     | 493     | 224     | 52 |
| GO:003 |                                                    |        | 24/234 | 0.00022 | 0.00207 | 0.00156 |    |
| 3017   | sarcoplasmic reticulum membrane                    | 8/1737 | 36     | 448     | 505     | 549     | 8  |
| GO:000 |                                                    |        | 30/234 | 0.00022 | 0.00207 | 0.00156 |    |
| 0314   | organellar small ribosomal subunit                 | 9/1737 | 36     | 632     | 505     | 549     | 9  |
| GO:000 |                                                    |        | 30/234 | 0.00022 | 0.00207 | 0.00156 |    |
| 5763   | mitochondrial small ribosomal subunit              | 9/1737 | 36     | 632     | 505     | 549     | 9  |
| GO:004 |                                                    | 17/173 | 89/234 | 0.00025 | 0.00231 | 0.00174 |    |
| 5335   | phagocytic vesicle                                 | 7      | 36     | 605     | 755     | 844     | 17 |
| GO:004 | plasma membrane raft                               | 21/173 | 123/23 | 0.00026 | 0.00238 | 0.00179 | 21 |

|        |                                           |        |        |         |         |         |    |
|--------|-------------------------------------------|--------|--------|---------|---------|---------|----|
| 4853   |                                           | 7      | 436    | 673     | 37      | 835     |    |
| GO:001 |                                           | 24/173 | 150/23 | 0.00028 | 0.00247 | 0.00186 |    |
| 5934   | large ribosomal subunit                   | 7      | 436    | 023     | 299     | 571     | 24 |
| GO:000 |                                           | 31/173 | 219/23 | 0.00038 | 0.00336 | 0.00253 |    |
| 5802   | trans-Golgi network                       | 7      | 436    | 602     | 459     | 836     | 31 |
| GO:000 |                                           | 15/173 | 77/234 | 0.00046 | 0.00400 | 0.00301 |    |
| 5746   | mitochondrial respiratory chain           | 7      | 36     | 482     | 202     | 926     | 15 |
| GO:000 |                                           | 17/173 | 94/234 | 0.00050 | 0.00425 | 0.00321 |    |
| 5901   | caveola                                   | 7      | 36     | 025     | 512     | 021     | 17 |
| GO:003 |                                           | 32/173 | 233/23 | 0.00053 | 0.00451 | 0.00340 |    |
| 1965   | nuclear membrane                          | 7      | 436    | 776     | 975     | 986     | 32 |
| GO:009 |                                           | 15/173 | 81/234 | 0.00081 | 0.00674 | 0.00508 |    |
| 8803   | respiratory chain complex                 | 7      | 36     | 153     | 05      | 528     | 15 |
| GO:001 |                                           | 31/173 | 229/23 | 0.00083 | 0.00681 | 0.00514 |    |
| 6323   | basolateral plasma membrane               | 7      | 436    | 067     | 922     | 467     | 31 |
| GO:000 |                                           | 11/173 | 50/234 | 0.00090 | 0.00717 | 0.00541 |    |
| 5747   | mitochondrial respiratory chain complex I | 7      | 36     | 497     | 877     | 592     | 11 |
| GO:003 |                                           | 11/173 | 50/234 | 0.00090 | 0.00717 | 0.00541 |    |
| 0964   | NADH dehydrogenase complex                | 7      | 36     | 497     | 877     | 592     | 11 |
| GO:004 |                                           | 11/173 | 50/234 | 0.00090 | 0.00717 | 0.00541 |    |
| 5271   | respiratory chain complex I               | 7      | 36     | 497     | 877     | 592     | 11 |
| GO:003 |                                           |        | 29/234 | 0.00093 | 0.00736 | 0.00555 |    |
| 0140   | trans-Golgi network transport vesicle     | 8/1737 | 36     | 863     | 302     | 492     | 8  |
| GO:007 |                                           |        | 23/234 | 0.00103 | 0.00801 | 0.00604 |    |
| 1782   | endoplasmic reticulum tubular network     | 7/1737 | 36     | 255     | 078     | 362     | 7  |
| GO:000 | Golgi-associated vesicle                  | 21/173 | 136/23 | 0.00104 | 0.00804 | 0.00606 | 21 |

|        |                                   |        |        |         |         |         |    |
|--------|-----------------------------------|--------|--------|---------|---------|---------|----|
| 5798   |                                   | 7      | 436    | 923     | 443     | 9       |    |
| GO:001 |                                   | 39/173 | 314/23 | 0.00106 | 0.00804 | 0.00606 |    |
| 9898   | extrinsic component of membrane   | 7      | 436    | 826     | 443     | 9       | 39 |
| GO:009 |                                   | 45/173 | 377/23 | 0.00107 | 0.00804 | 0.00606 |    |
| 8589   | membrane region                   | 7      | 436    | 107     | 443     | 9       | 45 |
| GO:190 |                                   | 17/173 | 101/23 | 0.00116 | 0.00863 | 0.00651 |    |
| 2911   | protein kinase complex            | 7      | 436    | 178     | 389     | 372     | 17 |
| GO:003 |                                   | 38/173 | 306/23 | 0.00123 | 0.00906 | 0.00683 |    |
| 0659   | cytoplasmic vesicle membrane      | 7      | 436    | 212     | 122     | 611     | 38 |
| GO:001 |                                   | 12/173 | 60/234 | 0.00131 | 0.00956 | 0.00721 |    |
| 6459   | myosin complex                    | 7      | 36     | 41      | 446     | 577     | 12 |
| GO:001 |                                   | 40/173 | 332/23 | 0.00165 | 0.01190 | 0.00898 |    |
| 2506   | vesicle membrane                  | 7      | 436    | 306     | 876     | 439     | 40 |
| GO:000 |                                   |        | 13/234 | 0.00172 | 0.01232 | 0.00929 |    |
| 2199   | zona pellucida receptor complex   | 5/1737 | 36     | 766     | 045     | 499     | 5  |
| GO:003 |                                   |        | 32/234 | 0.00188 | 0.01327 | 0.01001 |    |
| 6379   | myofilament                       | 8/1737 | 36     | 485     | 786     | 729     | 8  |
| GO:009 |                                   | 53/173 | 475/23 | 0.00189 | 0.01327 | 0.01001 |    |
| 9568   | cytoplasmic region                | 7      | 436    | 952     | 786     | 729     | 53 |
| GO:000 |                                   | 33/173 | 263/23 | 0.00209 | 0.01453 | 0.01096 |    |
| 5769   | early endosome                    | 7      | 436    | 982     | 402     | 498     | 33 |
| GO:007 |                                   | 15/173 | 89/234 | 0.00217 | 0.01493 | 0.01126 |    |
| 0469   | respiratory chain                 | 7      | 36     | 885     | 463     | 722     | 15 |
| GO:009 |                                   |        | 26/234 | 0.00227 | 0.01545 | 0.01166 |    |
| 7038   | perinuclear endoplasmic reticulum | 7/1737 | 36     | 682     | 608     | 061     | 7  |
| GO:001 | nuclear speck                     | 38/173 | 317/23 | 0.00232 | 0.01561 | 0.01178 | 38 |

|        |                                      |        |        |         |         |         |    |
|--------|--------------------------------------|--------|--------|---------|---------|---------|----|
| 6607   |                                      | 7      | 436    | 377     | 447     | 011     |    |
| GO:001 |                                      | 12/173 | 64/234 | 0.00234 | 0.01561 | 0.01178 |    |
| 0494   | cytoplasmic stress granule           | 7      | 36     | 438     | 447     | 011     | 12 |
| GO:003 |                                      | 16/173 | 99/234 | 0.00246 | 0.01625 | 0.01226 |    |
| 0864   | cortical actin cytoskeleton          | 7      | 36     | 394     | 738     | 515     | 16 |
| GO:004 |                                      | 36/173 | 299/23 | 0.00276 | 0.01792 | 0.01351 |    |
| 4445   | cytosolic part                       | 7      | 436    | 647     | 049     | 985     | 36 |
| GO:004 |                                      | 27/173 | 206/23 | 0.00276 | 0.01792 | 0.01351 |    |
| 4798   | nuclear transcription factor complex | 7      | 436    | 676     | 049     | 985     | 27 |
| GO:007 |                                      | 31/173 | 247/23 | 0.00280 | 0.01797 | 0.01355 |    |
| 0382   | exocytic vesicle                     | 7      | 436    | 005     | 12      | 811     | 31 |
| GO:004 |                                      | 42/173 | 364/23 | 0.00290 | 0.01847 | 0.01393 |    |
| 5121   | membrane raft                        | 7      | 436    | 435     | 268     | 645     | 42 |
| GO:009 |                                      | 42/173 | 365/23 | 0.00305 | 0.01924 | 0.01451 |    |
| 8857   | membrane microdomain                 | 7      | 436    | 311     | 551     | 95      | 42 |
| GO:000 |                                      | 26/173 | 198/23 | 0.00319 | 0.01994 | 0.01504 |    |
| 5770   | late endosome                        | 7      | 436    | 281     | 803     | 951     | 26 |
| GO:000 |                                      | 17/173 | 112/23 | 0.00361 | 0.02239 | 0.01689 |    |
| 5913   | cell-cell adherens junction          | 7      | 436    | 641     | 634     | 66      | 17 |
| GO:001 |                                      | 14/173 | 85/234 | 0.00374 | 0.02295 | 0.01731 |    |
| 5935   | small ribosomal subunit              | 7      | 36     | 222     | 409     | 739     | 14 |
| GO:004 |                                      | 10/173 | 51/234 | 0.00377 | 0.02295 | 0.01731 |    |
| 4420   | extracellular matrix component       | 7      | 36     | 149     | 409     | 739     | 10 |
| GO:000 |                                      |        | 10/234 | 0.00439 | 0.02605 | 0.01965 |    |
| 5832   | chaperonin-containing T-complex      | 4/1737 | 36     | 186     | 588     | 749     | 4  |
| GO:004 | laminin complex                      | 4/1737 | 10/234 | 0.00439 | 0.02605 | 0.01965 | 4  |



|        |                                                                |        |        |         |         |         |    |
|--------|----------------------------------------------------------------|--------|--------|---------|---------|---------|----|
| 3256   |                                                                |        | 36     | 186     | 588     | 749     |    |
| GO:004 |                                                                |        | 10/234 | 0.00439 | 0.02605 | 0.01965 |    |
| 5240   | dihydrolipoyl dehydrogenase complex                            | 4/1737 | 36     | 186     | 588     | 749     | 4  |
| GO:009 |                                                                | 22/173 | 163/23 | 0.00456 | 0.02686 | 0.02026 |    |
| 0575   | RNA polymerase II transcription factor complex                 | 7      | 436    | 659     | 679     | 927     | 22 |
| GO:006 |                                                                | 30/173 | 245/23 | 0.00465 | 0.02714 | 0.02047 |    |
| 1695   | transferase complex, transferring phosphorus-containing groups | 7      | 436    | 192     | 258     | 733     | 30 |
| GO:003 |                                                                |        | 37/234 | 0.00497 | 0.02877 | 0.02170 |    |
| 1941   | filamentous actin                                              | 8/1737 | 36     | 209     | 291     | 731     | 8  |
| GO:003 |                                                                | 15/173 | 97/234 | 0.00507 | 0.02912 | 0.02197 |    |
| 1594   | neuromuscular junction                                         | 7      | 36     | 382     | 289     | 135     | 15 |
| GO:000 |                                                                |        | 30/234 | 0.00543 | 0.03019 | 0.02277 |    |
| 5865   | striated muscle thin filament                                  | 7/1737 | 36     | 101     | 126     | 736     | 7  |
| GO:004 |                                                                |        | 30/234 | 0.00543 | 0.03019 | 0.02277 |    |
| 4215   | other organism                                                 | 7/1737 | 36     | 101     | 126     | 736     | 7  |
| GO:004 |                                                                |        | 30/234 | 0.00543 | 0.03019 | 0.02277 |    |
| 4216   | other organism cell                                            | 7/1737 | 36     | 101     | 126     | 736     | 7  |
| GO:004 |                                                                |        | 30/234 | 0.00543 | 0.03019 | 0.02277 |    |
| 4217   | other organism part                                            | 7/1737 | 36     | 101     | 126     | 736     | 7  |
| GO:000 |                                                                | 28/173 | 227/23 | 0.00552 | 0.03045 | 0.02297 |    |
| 8021   | synaptic vesicle                                               | 7      | 436    | 239     | 942     | 967     | 28 |
| GO:003 |                                                                |        | 17/234 | 0.00647 | 0.03529 | 0.02663 |    |
| 2982   | myosin filament                                                | 5/1737 | 36     | 279     | 836     | 034     | 5  |
| GO:004 |                                                                |        | 11/234 | 0.00649 | 0.03529 | 0.02663 |    |
| 4666   | MLL3/4 complex                                                 | 4/1737 | 36     | 97      | 836     | 034     | 4  |
| GO:003 | coated vesicle                                                 | 23/173 | 181/23 | 0.00789 | 0.04255 | 0.03210 | 23 |

|        |                                                      |        |        |         |         |         |    |
|--------|------------------------------------------------------|--------|--------|---------|---------|---------|----|
| 0135   |                                                      | 7      | 436    | 584     | 315     | 361     |    |
| GO:003 |                                                      | 19/173 | 141/23 | 0.00814 | 0.04356 | 0.03286 |    |
| 0176   | integral component of endoplasmic reticulum membrane | 7      | 436    | 547     | 591     | 768     | 19 |
| GO:000 |                                                      |        | 18/234 | 0.00842 | 0.04437 | 0.03348 |    |
| 5782   | peroxisomal matrix                                   | 5/1737 | 36     | 336     | 978     | 169     | 5  |
| GO:003 |                                                      |        | 18/234 | 0.00842 | 0.04437 | 0.03348 |    |
| 1907   | microbody lumen                                      | 5/1737 | 36     | 336     | 978     | 169     | 5  |
| GO:004 |                                                      | 11/173 | 66/234 | 0.00877 | 0.04591 | 0.03463 |    |
| 5178   | basal part of cell                                   | 7      | 36     | 912     | 153     | 73      | 11 |
| GO:003 |                                                      | 22/173 | 173/23 | 0.00914 | 0.04732 | 0.03570 |    |
| 0139   | endocytic vesicle                                    | 7      | 436    | 857     | 551     | 405     | 22 |
| GO:003 |                                                      |        | 12/234 | 0.00918 | 0.04732 | 0.03570 |    |
| 2009   | early phagosome                                      | 4/1737 | 36     | 356     | 551     | 405     | 4  |
| GO:003 |                                                      | 41/173 | 383/23 | 0.01139 | 0.05829 | 0.04398 |    |
| 0141   | secretory granule                                    | 7      | 436    | 504     | 636     | 085     | 41 |
| GO:000 |                                                      |        | 13/234 | 0.01249 | 0.06307 | 0.04758 |    |
| 5641   | nuclear envelope lumen                               | 4/1737 | 36     | 73      | 404     | 531     | 4  |
| GO:000 |                                                      |        | 27/234 | 0.01258 | 0.06307 | 0.04758 |    |
| 2102   | podosome                                             | 6/1737 | 36     | 542     | 404     | 531     | 6  |
| GO:000 |                                                      |        | 43/234 | 0.01259 | 0.06307 | 0.04758 |    |
| 9925   | basal plasma membrane                                | 8/1737 | 36     | 694     | 404     | 531     | 8  |
| GO:000 |                                                      | 44/173 | 420/23 | 0.01288 | 0.06406 | 0.04833 |    |
| 5874   | microtubule                                          | 7      | 436    | 496     | 186     | 055     | 44 |
| GO:003 |                                                      | 14/173 | 98/234 | 0.01315 | 0.06425 | 0.04847 |    |
| 0136   | clathrin-coated vesicle                              | 7      | 36     | 285     | 493     | 621     | 14 |
| GO:000 | gamma-tubulin complex                                | 5/1737 | 20/234 | 0.01346 | 0.06425 | 0.04847 | 5  |

|        |                                                       |        |        |         |         |         |    |
|--------|-------------------------------------------------------|--------|--------|---------|---------|---------|----|
| 0930   |                                                       |        | 36     | 987     | 493     | 621     |    |
| GO:001 |                                                       |        | 20/234 | 0.01346 | 0.06425 | 0.04847 |    |
| 6010   | dystrophin-associated glycoprotein complex            | 5/1737 | 36     | 987     | 493     | 621     | 5  |
| GO:003 |                                                       |        | 20/234 | 0.01346 | 0.06425 | 0.04847 |    |
| 3646   | host intracellular part                               | 5/1737 | 36     | 987     | 493     | 621     | 5  |
| GO:004 |                                                       |        | 20/234 | 0.01346 | 0.06425 | 0.04847 |    |
| 3656   | intracellular region of host                          | 5/1737 | 36     | 987     | 493     | 621     | 5  |
| GO:009 |                                                       |        | 20/234 | 0.01346 | 0.06425 | 0.04847 |    |
| 0665   | glycoprotein complex                                  | 5/1737 | 36     | 987     | 493     | 621     | 5  |
| GO:003 |                                                       | 19/173 | 149/23 | 0.01428 | 0.06768 | 0.05106 |    |
| 1227   | intrinsic component of endoplasmic reticulum membrane | 7      | 436    | 43      | 264     | 22      | 19 |
| GO:004 |                                                       | 23/173 | 193/23 | 0.01632 | 0.07660 | 0.05779 |    |
| 3197   | dendritic spine                                       | 7      | 436    | 5       | 558     | 398     | 23 |
| GO:007 |                                                       |        | 14/234 | 0.01648 | 0.07660 | 0.05779 |    |
| 1437   | invadopodium                                          | 4/1737 | 36     | 643     | 558     | 398     | 4  |
| GO:000 |                                                       | 13/173 | 91/234 | 0.01649 | 0.07660 | 0.05779 |    |
| 5902   | microvillus                                           | 7      | 36     | 299     | 558     | 398     | 13 |
| GO:010 |                                                       |        | 21/234 | 0.01662 | 0.07670 | 0.05786 |    |
| 1031   | chaperone complex                                     | 5/1737 | 36     | 316     | 554     | 94      | 5  |
| GO:190 |                                                       | 12/173 | 82/234 | 0.01738 | 0.07972 | 0.06014 |    |
| 2554   | serine/threonine protein kinase complex               | 7      | 36     | 938     | 015     | 372     | 12 |
| GO:000 |                                                       |        | 46/234 | 0.01863 | 0.08489 | 0.06404 |    |
| 0791   | euchromatin                                           | 8/1737 | 36     | 857     | 567     | 832     | 8  |
| GO:003 |                                                       |        | 22/234 | 0.02023 | 0.09155 | 0.06907 |    |
| 3643   | host cell part                                        | 5/1737 | 36     | 026     | 489     | 227     | 5  |
| GO:000 | phagophore assembly site                              | 6/1737 | 30/234 | 0.02089 | 0.09395 | 0.07087 | 6  |

|        |                                             |        |        |         |         |         |    |
|--------|---------------------------------------------|--------|--------|---------|---------|---------|----|
| 0407   |                                             |        | 36     | 257     | 004     | 926     |    |
| GO:004 |                                             | 23/173 | 198/23 | 0.02145 | 0.09587 | 0.07233 |    |
| 4309   | neuron spine                                | 7      | 436    | 718     | 828     | 4       | 23 |
| GO:009 |                                             | 24/173 | 209/23 | 0.02166 | 0.09621 | 0.07259 |    |
| 8858   | actin-based cell projection                 | 7      | 436    | 95      | 804     | 032     | 24 |
| GO:005 |                                             | 45/168 | 200/22 | 1.4458E | 1.023E- | 8.4477E |    |
| 1015   | actin filament binding                      | 9      | 710    | -11     | 08      | -09     | 45 |
| GO:000 |                                             | 73/168 | 428/22 | 1.9085E | 1.023E- | 8.4477E |    |
| 3779   | actin binding                               | 9      | 710    | -11     | 08      | -09     | 73 |
| GO:005 |                                             | 49/168 | 288/22 | 4.1871E | 1.4962E | 1.2356E |    |
| 0662   | coenzyme binding                            | 9      | 710    | -08     | -05     | -05     | 49 |
| GO:001 |                                             | 21/168 | 80/227 | 2.4951E | 6.6869E | 5.5221E |    |
| 6651   | oxidoreductase activity, acting on NAD(P)H  | 9      | 10     | -07     | -05     | -05     | 21 |
| GO:001 |                                             | 30/168 | 147/22 | 3.4249E | 6.8705E | 5.6737E |    |
| 9838   | growth factor binding                       | 9      | 710    | -07     | -05     | -05     | 30 |
| GO:000 |                                             | 29/168 | 140/22 | 3.8454E | 6.8705E | 5.6737E |    |
| 5201   | extracellular matrix structural constituent | 9      | 710    | -07     | -05     | -05     | 29 |
| GO:001 |                                             | 16/168 | 55/227 | 1.4974E | 0.00022 | 0.00018 |    |
| 6836   | hydro-lyase activity                        | 9      | 10     | -06     | 931     | 937     | 16 |
| GO:000 |                                             | 62/168 | 454/22 | 2.477E- | 0.00033 | 0.00027 |    |
| 3712   | transcription coregulator activity          | 9      | 710    | 06      | 191     | 41      | 62 |
| GO:001 |                                             | 32/168 | 184/22 | 5.5381E | 0.00065 | 0.00054 |    |
| 6829   | lyase activity                              | 9      | 710    | -06     | 964     | 474     | 32 |
| GO:000 |                                             | 17/168 | 70/227 | 1.0659E | 0.00114 | 0.00094 |    |
| 9055   | electron transfer activity                  | 9      | 10     | -05     | 268     | 363     | 17 |
| GO:009 | scaffold protein binding                    | 17/168 | 71/227 | 1.3052E | 0.00127 | 0.00105 | 17 |

|        |                                                                             |        |        |         |         |         |    |
|--------|-----------------------------------------------------------------------------|--------|--------|---------|---------|---------|----|
| 7110   |                                                                             | 9      | 10     | -05     | 2       | 043     |    |
| GO:003 |                                                                             | 51/168 | 371/22 | 1.5646E | 0.00139 | 0.00115 |    |
| 3218   | amide binding                                                               | 9      | 710    | -05     | 772     | 424     | 51 |
| GO:190 |                                                                             | 38/168 | 250/22 | 2.0137E | 0.00157 | 0.00130 |    |
| 1681   | sulfur compound binding                                                     | 9      | 710    | -05     | 465     | 035     | 38 |
| GO:005 |                                                                             | 37/168 | 241/22 | 2.0564E | 0.00157 | 0.00130 |    |
| 0839   | cell adhesion molecule binding                                              | 9      | 710    | -05     | 465     | 035     | 37 |
| GO:001 |                                                                             | 16/168 | 67/227 | 2.4121E | 0.00172 | 0.00142 |    |
| 6835   | carbon-oxygen lyase activity                                                | 9      | 10     | -05     | 387     | 358     | 16 |
| GO:000 |                                                                             | 30/168 | 182/22 | 3.1197E | 0.00209 | 0.00172 |    |
| 3735   | structural constituent of ribosome                                          | 9      | 710    | -05     | 018     | 608     | 30 |
| GO:004 |                                                                             | 24/168 | 136/22 | 6.192E- | 0.00389 | 0.00321 |    |
| 4325   | ion channel binding                                                         | 9      | 710    | 05      | 777     | 88      | 24 |
| GO:000 |                                                                             | 23/168 | 128/22 | 6.5448E | 0.00389 | 0.00321 |    |
| 5178   | integrin binding                                                            | 9      | 710    | -05     | 777     | 88      | 23 |
| GO:005 |                                                                             |        | 21/227 | 7.778E- | 0.00412 | 0.00340 |    |
| 1371   | muscle alpha-actinin binding                                                | 8/1689 | 10     | 05      | 573     | 705     | 8  |
| GO:005 |                                                                             | 14/168 | 59/227 | 8.2731E | 0.00412 | 0.00340 |    |
| 0840   | extracellular matrix binding                                                | 9      | 10     | -05     | 573     | 705     | 14 |
| GO:005 |                                                                             | 19/168 | 97/227 | 8.3711E | 0.00412 | 0.00340 |    |
| 1082   | unfolded protein binding                                                    | 9      | 10     | -05     | 573     | 705     | 19 |
| GO:003 |                                                                             | 42/168 | 306/22 | 8.7789E | 0.00412 | 0.00340 |    |
| 1625   | ubiquitin protein ligase binding                                            | 9      | 710    | -05     | 573     | 705     | 42 |
| GO:003 |                                                                             | 24/168 | 139/22 | 8.8518E | 0.00412 | 0.00340 |    |
| 1072   | heat shock protein binding                                                  | 9      | 710    | -05     | 573     | 705     | 24 |
| GO:001 | transferase activity, transferring alkyl or aryl (other than methyl) groups | 14/168 | 61/227 | 0.00012 | 0.00543 | 0.00448 | 14 |

|        |                                                                            |        |        |         |         |         |    |
|--------|----------------------------------------------------------------------------|--------|--------|---------|---------|---------|----|
| 6765   |                                                                            | 9      | 10     | 172     | 678     | 972     |    |
| GO:000 |                                                                            | 34/168 | 234/22 | 0.00013 | 0.00559 | 0.00462 |    |
| 8022   | protein C-terminus binding                                                 | 9      | 710    | 284     | 709     | 21      | 34 |
| GO:000 |                                                                            | 15/168 | 69/227 | 0.00013 | 0.00559 | 0.00462 |    |
| 5518   | collagen binding                                                           | 9      | 10     | 575     | 709     | 21      | 15 |
| GO:005 |                                                                            | 14/168 | 62/227 | 0.00014 | 0.00581 | 0.00480 |    |
| 1287   | NAD binding                                                                | 9      | 10     | 658     | 959     | 585     | 14 |
| GO:004 |                                                                            | 43/168 | 325/22 | 0.00016 | 0.00630 | 0.00520 |    |
| 4389   | ubiquitin-like protein ligase binding                                      | 9      | 710    | 82      | 306     | 51      | 43 |
| GO:000 |                                                                            | 29/168 | 190/22 | 0.00017 | 0.00630 | 0.00520 |    |
| 5516   | calmodulin binding                                                         | 9      | 710    | 08      | 306     | 51      | 29 |
| GO:000 |                                                                            |        | 13/227 | 0.00018 | 0.00630 | 0.00520 |    |
| 4659   | prenyltransferase activity                                                 | 6/1689 | 10     | 227     | 306     | 51      | 6  |
| GO:004 |                                                                            |        | 13/227 | 0.00018 | 0.00630 | 0.00520 |    |
| 4548   | S100 protein binding                                                       | 6/1689 | 10     | 227     | 306     | 51      | 6  |
| GO:001 | oxidoreductase activity, acting on NAD(P)H, quinone or similar compound as | 10/168 | 36/227 | 0.00021 | 0.00714 | 0.00589 |    |
| 6655   | acceptor                                                                   | 9      | 10     | 32      | 222     | 808     | 10 |
| GO:003 |                                                                            | 37/168 | 270/22 | 0.00023 | 0.00752 | 0.00621 |    |
| 0246   | carbohydrate binding                                                       | 9      | 710    | 15      | 04      | 039     | 37 |
| GO:005 |                                                                            | 14/168 | 65/227 | 0.00024 | 0.00763 | 0.00630 |    |
| 1536   | iron-sulfur cluster binding                                                | 9      | 10     | 918     | 19      | 246     | 14 |
| GO:005 |                                                                            | 14/168 | 65/227 | 0.00024 | 0.00763 | 0.00630 |    |
| 1540   | metal cluster binding                                                      | 9      | 10     | 918     | 19      | 246     | 14 |
| GO:001 |                                                                            | 24/168 | 149/22 | 0.00026 | 0.00790 | 0.00652 |    |
| 6614   | oxidoreductase activity, acting on CH-OH group of donors                   | 9      | 710    | 56      | 52      | 816     | 24 |
| GO:005 | alpha-actinin binding                                                      | 10/168 | 37/227 | 0.00027 | 0.00790 | 0.00652 | 10 |

|        |                                                             |        |        |         |         |         |    |
|--------|-------------------------------------------------------------|--------|--------|---------|---------|---------|----|
| 1393   |                                                             | 9      | 10     | 285     | 52      | 816     |    |
| GO:000 |                                                             |        | 14/227 | 0.00029 | 0.00843 | 0.00696 |    |
| 5159   | insulin-like growth factor receptor binding                 | 6/1689 | 10     | 891     | 242     | 353     | 6  |
| GO:005 |                                                             | 18/168 | 99/227 | 0.00033 | 0.00926 | 0.00765 |    |
| 1087   | chaperone binding                                           | 9      | 10     | 718     | 815     | 369     | 18 |
| GO:003 |                                                             | 45/168 | 361/22 | 0.00045 | 0.01231 | 0.01017 |    |
| 2550   | purine ribonucleoside binding                               | 9      | 710    | 955     | 606     | 067     | 45 |
| GO:000 |                                                             | 24/168 | 155/22 | 0.00048 | 0.01262 | 0.01042 |    |
| 8201   | heparin binding                                             | 9      | 710    | 268     | 027     | 188     | 24 |
| GO:000 |                                                             | 13/168 | 62/227 | 0.00054 | 0.01378 | 0.01138 |    |
| 5080   | protein kinase C binding                                    | 9      | 10     | 015     | 662     | 506     | 13 |
| GO:000 |                                                             | 45/168 | 365/22 | 0.00058 | 0.01412 | 0.01166 |    |
| 1883   | purine nucleoside binding                                   | 9      | 710    | 244     | 707     | 621     | 45 |
| GO:001 |                                                             | 12/168 | 55/227 | 0.00059 | 0.01412 | 0.01166 |    |
| 6667   | oxidoreductase activity, acting on a sulfur group of donors | 9      | 10     | 891     | 707     | 621     | 12 |
| GO:003 |                                                             | 45/168 | 366/22 | 0.00061 | 0.01412 | 0.01166 |    |
| 2549   | ribonucleoside binding                                      | 9      | 710    | 74      | 707     | 621     | 45 |
| GO:000 |                                                             | 13/168 | 63/227 | 0.00063 | 0.01412 | 0.01166 |    |
| 5200   | structural constituent of cytoskeleton                      | 9      | 10     | 49      | 707     | 621     | 13 |
| GO:001 |                                                             | 46/168 | 377/22 | 0.00063 | 0.01412 | 0.01166 |    |
| 9001   | guanyl nucleotide binding                                   | 9      | 710    | 765     | 707     | 621     | 46 |
| GO:003 |                                                             | 46/168 | 377/22 | 0.00063 | 0.01412 | 0.01166 |    |
| 2561   | guanyl ribonucleotide binding                               | 9      | 710    | 765     | 707     | 621     | 46 |
| GO:004 |                                                             | 11/168 | 48/227 | 0.00064 | 0.01412 | 0.01166 |    |
| 2805   | actinin binding                                             | 9      | 10     | 573     | 707     | 621     | 11 |
| GO:000 | enzyme activator activity                                   | 53/168 | 452/22 | 0.00067 | 0.01438 | 0.01187 | 53 |

|        |                                                |        |        |         |         |         |         |
|--------|------------------------------------------------|--------|--------|---------|---------|---------|---------|
| 8047   |                                                | 9      | 710    | 097     | 558     | 969     |         |
| GO:000 |                                                |        | 28/227 | 0.00074 | 0.01561 | 0.01289 |         |
| 3954   | NADH dehydrogenase activity                    | 8/1689 | 10     | 301     | 788     | 733     | 8       |
| GO:003 |                                                |        | 22/227 | 0.00078 | 0.01567 | 0.01294 |         |
| 4237   | protein kinase A regulatory subunit binding    | 7/1689 | 10     | 279     | 351     | 326     | 7       |
| GO:000 |                                                |        | 29/168 | 208/22  | 0.00078 | 0.01567 | 0.01294 |
| 5539   | glycosaminoglycan binding                      | 9      | 710    | 952     | 351     | 326     | 29      |
| GO:003 |                                                |        | 29/168 | 208/22  | 0.00078 | 0.01567 | 0.01294 |
| 1406   | carboxylic acid binding                        | 9      | 710    | 952     | 351     | 326     | 29      |
| GO:000 |                                                |        | 34/168 | 258/22  | 0.00082 | 0.01606 | 0.01326 |
| 3713   | transcription coactivator activity             | 9      | 710    | 443     | 892     | 98      | 34      |
| GO:004 |                                                |        | 13/168 | 65/227  | 0.00086 | 0.01659 | 0.01370 |
| 3621   | protein self-association                       | 9      | 10     | 682     | 345     | 295     | 13      |
| GO:001 |                                                |        | 23/168 | 153/22  | 0.00094 | 0.01786 | 0.01475 |
| 6853   | isomerase activity                             | 9      | 710    | 996     | 59      | 375     | 23      |
| GO:000 |                                                |        |        | 17/227  | 0.00101 | 0.01868 | 0.01543 |
| 5086   | ARF guanyl-nucleotide exchange factor activity | 6/1689 | 10     | 435     | 958     | 395     | 6       |
| GO:000 |                                                |        | 43/168 | 354/22  | 0.00102 | 0.01868 | 0.01543 |
| 5525   | GTP binding                                    | 9      | 710    | 862     | 958     | 395     | 43      |
| GO:000 |                                                |        | 45/168 | 376/22  | 0.00108 | 0.01936 | 0.01599 |
| 1882   | nucleoside binding                             | 9      | 710    | 381     | 401     | 09      | 45      |
| GO:003 |                                                |        |        | 12/227  | 0.00114 | 0.01979 | 0.01634 |
| 2036   | myosin heavy chain binding                     | 5/1689 | 10     | 97      | 74      | 88      | 5       |
| GO:005 |                                                |        | 16/168 | 92/227  | 0.00116 | 0.01979 | 0.01634 |
| 1213   | dioxygenase activity                           | 9      | 10     | 059     | 74      | 88      | 16      |
| GO:004 | organic acid binding                           | 30/168 | 223/22 | 0.00116 | 0.01979 | 0.01634 | 30      |



|        |                                                                              |        |        |         |         |         |    |
|--------|------------------------------------------------------------------------------|--------|--------|---------|---------|---------|----|
| 3177   |                                                                              | 9      | 710    | 347     | 74      | 88      |    |
| GO:000 |                                                                              | 10/168 | 44/227 | 0.00120 | 0.02019 | 0.01668 |    |
| 8009   | chemokine activity                                                           | 9      | 10     | 593     | 939     | 076     | 10 |
| GO:004 |                                                                              | 15/168 | 84/227 | 0.00123 | 0.02042 | 0.01686 |    |
| 6332   | SMAD binding                                                                 | 9      | 10     | 859     | 717     | 886     | 15 |
| GO:004 |                                                                              | 15/168 | 85/227 | 0.00140 | 0.02278 | 0.01881 |    |
| 8029   | monosaccharide binding                                                       | 9      | 10     | 25      | 008     | 191     | 15 |
| GO:001 |                                                                              |        | 38/227 | 0.00154 | 0.02465 | 0.02035 |    |
| 9205   | nucleobase-containing compound kinase activity                               | 9/1689 | 10     | 083     | 334     | 886     | 9  |
| GO:001 |                                                                              | 15/168 | 86/227 | 0.00158 | 0.02468 | 0.02038 |    |
| 6209   | antioxidant activity                                                         | 9      | 10     | 422     | 566     | 555     | 15 |
| GO:001 | oxidoreductase activity, acting on the CH-OH group of donors, NAD or NADP as | 21/168 | 140/22 | 0.00159 | 0.02468 | 0.02038 |    |
| 6616   | acceptor                                                                     | 9      | 710    | 01      | 566     | 555     | 21 |
| GO:000 |                                                                              | 26/168 | 188/22 | 0.00161 | 0.02468 | 0.02038 |    |
| 3714   | transcription corepressor activity                                           | 9      | 710    | 194     | 566     | 555     | 26 |
| GO:000 |                                                                              |        | 13/227 | 0.00175 | 0.02509 | 0.02072 |    |
| 2161   | aminoacyl-tRNA editing activity                                              | 5/1689 | 10     | 434     | 512     | 368     | 5  |
| GO:001 |                                                                              |        | 13/227 | 0.00175 | 0.02509 | 0.02072 |    |
| 6840   | carbon-nitrogen lyase activity                                               | 5/1689 | 10     | 434     | 512     | 368     | 5  |
| GO:001 |                                                                              | 20/168 | 132/22 | 0.00179 | 0.02509 | 0.02072 |    |
| 9842   | vitamin binding                                                              | 9      | 710    | 454     | 512     | 368     | 20 |
| GO:000 |                                                                              |        | 25/227 | 0.00181 | 0.02509 | 0.02072 |    |
| 1671   | ATPase activator activity                                                    | 7/1689 | 10     | 152     | 512     | 368     | 7  |
| GO:000 |                                                                              |        | 25/227 | 0.00181 | 0.02509 | 0.02072 |    |
| 8137   | NADH dehydrogenase (ubiquinone) activity                                     | 7/1689 | 10     | 152     | 512     | 368     | 7  |
| GO:000 | structural constituent of muscle                                             | 7/1689 | 25/227 | 0.00181 | 0.02509 | 0.02072 | 7  |

|        |                                                                               |        |        |         |         |         |    |
|--------|-------------------------------------------------------------------------------|--------|--------|---------|---------|---------|----|
| 8307   |                                                                               |        | 10     | 152     | 512     | 368     |    |
| GO:005 |                                                                               |        | 25/227 | 0.00181 | 0.02509 | 0.02072 |    |
| 0136   | NADH dehydrogenase (quinone) activity                                         | 7/1689 | 10     | 152     | 512     | 368     | 7  |
| GO:000 |                                                                               | 36/168 | 291/22 | 0.00184 | 0.02509 | 0.02072 |    |
| 3924   | GTPase activity                                                               | 9      | 710    | 227     | 512     | 368     | 36 |
| GO:005 |                                                                               |        | 39/227 | 0.00187 | 0.02509 | 0.02072 |    |
| 1539   | 4 iron, 4 sulfur cluster binding                                              | 9/1689 | 10     | 277     | 512     | 368     | 9  |
| GO:006 |                                                                               |        | 39/227 | 0.00187 | 0.02509 | 0.02072 |    |
| 0590   | ATPase regulator activity                                                     | 9/1689 | 10     | 277     | 512     | 368     | 9  |
| GO:000 |                                                                               |        | 26/227 | 0.00232 | 0.03023 | 0.02496 |    |
| 5158   | insulin receptor binding                                                      | 7/1689 | 10     | 164     | 644     | 941     | 7  |
| GO:000 |                                                                               |        | 26/227 | 0.00232 | 0.03023 | 0.02496 |    |
| 5537   | mannose binding                                                               | 7/1689 | 10     | 164     | 644     | 941     | 7  |
| GO:001 |                                                                               | 28/168 | 213/22 | 0.00234 | 0.03023 | 0.02496 |    |
| 9902   | phosphatase binding                                                           | 9      | 710    | 845     | 644     | 941     | 28 |
| GO:001 |                                                                               |        | 33/227 | 0.00237 | 0.03023 | 0.02496 |    |
| 6504   | peptidase activator activity                                                  | 8/1689 | 10     | 898     | 644     | 941     | 8  |
| GO:004 |                                                                               | 37/168 | 306/22 | 0.00239 | 0.03023 | 0.02496 |    |
| 2277   | peptide binding                                                               | 9      | 710    | 748     | 644     | 941     | 37 |
| GO:001 |                                                                               | 33/168 | 265/22 | 0.00250 | 0.03118 | 0.02575 |    |
| 6791   | phosphatase activity                                                          | 9      | 710    | 195     | 71      | 447     | 33 |
| GO:003 |                                                                               |        | 14/227 | 0.00256 | 0.03157 | 0.02607 |    |
| 0021   | extracellular matrix structural constituent conferring compression resistance | 5/1689 | 10     | 291     | 974     | 871     | 5  |
| GO:003 |                                                                               |        | 41/227 | 0.00270 | 0.03297 | 0.02723 |    |
| 2451   | demethylase activity                                                          | 9/1689 | 10     | 692     | 52      | 109     | 9  |
| GO:003 | Hsp70 protein binding                                                         | 10/168 | 49/227 | 0.00284 | 0.03426 | 0.02829 | 10 |

|        |                                                      |        |        |         |         |         |    |
|--------|------------------------------------------------------|--------|--------|---------|---------|---------|----|
| 0544   |                                                      | 9      | 10     | 513     | 942     | 986     |    |
| GO:005 |                                                      |        | 34/227 | 0.00291 | 0.03467 | 0.02863 |    |
| 1019   | mitogen-activated protein kinase binding             | 8/1689 | 10     | 119     | 549     | 52      | 8  |
| GO:001 |                                                      | 13/168 | 74/227 | 0.00296 | 0.03491 | 0.02883 |    |
| 7022   | myosin binding                                       | 9      | 10     | 386     | 489     | 29      | 13 |
| GO:000 |                                                      | 47/168 | 419/22 | 0.00318 | 0.03707 | 0.03062 |    |
| 5543   | phospholipid binding                                 | 9      | 710    | 224     | 998     | 084     | 47 |
| GO:004 |                                                      | 41/168 | 355/22 | 0.00336 | 0.03882 | 0.03206 |    |
| 2578   | phosphoric ester hydrolase activity                  | 9      | 710    | 844     | 766     | 409     | 41 |
| GO:000 |                                                      | 16/168 | 102/22 | 0.00346 | 0.03954 | 0.03265 |    |
| 8238   | exopeptidase activity                                | 9      | 710    | 743     | 342     | 516     | 16 |
| GO:003 |                                                      | 21/168 | 150/22 | 0.00372 | 0.04200 | 0.03468 |    |
| 5257   | nuclear hormone receptor binding                     | 9      | 710    | 235     | 374     | 691     | 21 |
| GO:000 |                                                      | 11/168 | 59/227 | 0.00376 | 0.04209 | 0.03476 |    |
| 1540   | amyloid-beta binding                                 | 9      | 10     | 983     | 646     | 347     | 11 |
| GO:000 |                                                      | 23/168 | 171/22 | 0.00412 | 0.04512 | 0.03726 |    |
| 1085   | RNA polymerase II transcription factor binding       | 9      | 710    | 556     | 855     | 739     | 23 |
| GO:000 |                                                      | 23/168 | 171/22 | 0.00412 | 0.04512 | 0.03726 |    |
| 4721   | phosphoprotein phosphatase activity                  | 9      | 710    | 556     | 855     | 739     | 23 |
| GO:000 |                                                      |        | 36/227 | 0.00424 | 0.04601 | 0.03800 |    |
| 3755   | peptidyl-prolyl cis-trans isomerase activity         | 8/1689 | 10     | 984     | 842     | 225     | 8  |
| GO:009 |                                                      |        | 22/227 | 0.00443 | 0.04699 | 0.03881 |    |
| 0079   | translation regulator activity, nucleic acid binding | 6/1689 | 10     | 325     | 798     | 118     | 6  |
| GO:004 |                                                      |        | 10/227 | 0.00444 | 0.04699 | 0.03881 |    |
| 7429   | nucleoside-triphosphate diphosphatase activity       | 4/1689 | 10     | 678     | 798     | 118     | 4  |
| GO:005 | protein kinase A binding                             | 10/168 | 52/227 | 0.00447 | 0.04699 | 0.03881 | 10 |

|        |                                                        |        |        |         |         |         |    |
|--------|--------------------------------------------------------|--------|--------|---------|---------|---------|----|
| 1018   |                                                        | 9      | 10     | 182     | 798     | 118     |    |
| GO:000 |                                                        | 15/168 | 96/227 | 0.00474 | 0.04935 | 0.04075 |    |
| 4725   | protein tyrosine phosphatase activity                  | 9      | 10     | 178     | 133     | 459     | 15 |
| GO:003 |                                                        |        | 23/227 | 0.00562 | 0.05743 | 0.04743 |    |
| 0506   | ankyrin binding                                        | 6/1689 | 10     | 607     | 95      | 384     | 6  |
| GO:003 |                                                        |        | 23/227 | 0.00562 | 0.05743 | 0.04743 |    |
| 1681   | G-protein beta-subunit binding                         | 6/1689 | 10     | 607     | 95      | 384     | 6  |
| GO:000 |                                                        | 20/168 | 146/22 | 0.00583 | 0.05849 | 0.04830 |    |
| 2020   | protease binding                                       | 9      | 710    | 836     | 275     | 361     | 20 |
| GO:001 |                                                        | 20/168 | 146/22 | 0.00583 | 0.05849 | 0.04830 |    |
| 6874   | ligase activity                                        | 9      | 710    | 836     | 275     | 361     | 20 |
| GO:000 |                                                        | 10/168 | 54/227 | 0.00591 | 0.05867 | 0.04845 |    |
| 4601   | peroxidase activity                                    | 9      | 10     | 096     | 173     | 142     | 10 |
| GO:000 |                                                        |        | 38/227 | 0.00601 | 0.05918 | 0.04887 |    |
| 8138   | protein tyrosine/serine/threonine phosphatase activity | 8/1689 | 10     | 773     | 351     | 405     | 8  |
| GO:005 |                                                        |        | 46/227 | 0.00609 | 0.05936 | 0.04902 |    |
| 1879   | Hsp90 protein binding                                  | 9/1689 | 10     | 155     | 491     | 385     | 9  |
| GO:001 |                                                        | 38/168 | 336/22 | 0.00652 | 0.06170 | 0.05095 |    |
| 5631   | tubulin binding                                        | 9      | 710    | 034     | 05      | 259     | 38 |
| GO:001 |                                                        | 12/168 | 72/227 | 0.00652 | 0.06170 | 0.05095 |    |
| 9843   | rRNA binding                                           | 9      | 10     | 168     | 05      | 259     | 12 |
| GO:000 |                                                        |        | 11/227 | 0.00657 | 0.06170 | 0.05095 |    |
| 2162   | dystroglycan binding                                   | 4/1689 | 10     | 962     | 05      | 259     | 4  |
| GO:001 |                                                        |        | 11/227 | 0.00657 | 0.06170 | 0.05095 |    |
| 6846   | carbon-sulfur lyase activity                           | 4/1689 | 10     | 962     | 05      | 259     | 4  |
| GO:000 | fibronectin binding                                    | 7/1689 | 31/227 | 0.00669 | 0.06170 | 0.05095 | 7  |

|        |                                                     |        |         |         |         |         |
|--------|-----------------------------------------------------|--------|---------|---------|---------|---------|
| 1968   |                                                     | 10     | 656     | 05      | 259     |         |
| GO:004 |                                                     | 31/227 | 0.00669 | 0.06170 | 0.05095 |         |
| 6875   | ephrin receptor binding                             | 7/1689 | 10      | 656     | 05      | 259     |
| GO:005 |                                                     | 23/168 | 178/22  | 0.00673 | 0.06170 | 0.05095 |
| 1427   | hormone receptor binding                            | 9      | 710     | 41      | 05      | 259     |
| GO:199 |                                                     | 15/168 | 100/22  | 0.00695 | 0.06321 | 0.05220 |
| 0782   | protein tyrosine kinase binding                     | 9      | 710     | 821     | 353     | 206     |
| GO:003 |                                                     | 11/168 | 64/227  | 0.00713 | 0.06424 | 0.05305 |
| 0374   | nuclear receptor transcription coactivator activity | 9      | 10      | 117     | 045     | 009     |
| GO:006 |                                                     | 29/168 | 242/22  | 0.00749 | 0.06696 | 0.05529 |
| 1659   | ubiquitin-like protein ligase activity              | 9      | 710     | 6       | 423     | 941     |
| GO:000 |                                                     | 10/168 | 56/227  | 0.00768 | 0.06810 | 0.05624 |
| 8375   | acetylglucosaminyltransferase activity              | 9      | 10      | 732     | 588     | 219     |
| GO:000 |                                                     |        | 32/227  | 0.00803 | 0.07057 | 0.05828 |
| 4364   | glutathione transferase activity                    | 7/1689 | 10      | 23      | 886     | 439     |
| GO:001 |                                                     |        | 40/227  | 0.00829 | 0.07170 | 0.05921 |
| 5036   | disulfide oxidoreductase activity                   | 8/1689 | 10      | 439     | 63      | 543     |
| GO:001 |                                                     |        | 40/227  | 0.00829 | 0.07170 | 0.05921 |
| 6859   | cis-trans isomerase activity                        | 8/1689 | 10      | 439     | 63      | 543     |
| GO:001 |                                                     |        | 18/227  | 0.00854 | 0.07269 | 0.06003 |
| 6208   | AMP binding                                         | 5/1689 | 10      | 435     | 482     | 176     |
| GO:007 |                                                     |        | 18/227  | 0.00854 | 0.07269 | 0.06003 |
| 0628   | proteasome binding                                  | 5/1689 | 10      | 435     | 482     | 176     |
| GO:006 |                                                     | 28/168 | 234/22  | 0.00865 | 0.07306 | 0.06033 |
| 1630   | ubiquitin protein ligase activity                   | 9      | 710     | 592     | 413     | 674     |
| GO:004 | receptor ligand activity                            | 51/168 | 489/22  | 0.00911 | 0.07637 | 0.06306 |

|        |                                                         |        |        |         |         |         |    |
|--------|---------------------------------------------------------|--------|--------|---------|---------|---------|----|
| 8018   |                                                         | 9      | 710    | 903     | 184     | 826     |    |
| GO:004 |                                                         |        | 12/227 | 0.00929 | 0.07723 | 0.06378 |    |
| 3121   | neurotrophin binding                                    | 4/1689 | 10     | 458     | 872     | 413     | 4  |
| GO:014 |                                                         | 16/168 | 113/22 | 0.00942 | 0.07770 | 0.06417 |    |
| 0101   | catalytic activity, acting on a tRNA                    | 9      | 710    | 352     | 776     | 147     | 16 |
| GO:001 |                                                         | 10/168 | 58/227 | 0.00984 | 0.08059 | 0.06655 |    |
| 6684   | oxidoreductase activity, acting on peroxide as acceptor | 9      | 10     | 896     | 609     | 667     | 10 |
| GO:004 |                                                         | 11/168 | 67/227 | 0.01005 | 0.08168 | 0.06745 |    |
| 2379   | chemokine receptor binding                              | 9      | 10     | 841     | 647     | 711     | 11 |
| GO:001 |                                                         | 41/168 | 379/22 | 0.01016 | 0.08191 | 0.06764 |    |
| 6887   | ATPase activity                                         | 9      | 710    | 336     | 821     | 849     | 41 |
| GO:003 |                                                         |        | 26/227 | 0.01059 | 0.08427 | 0.06959 |    |
| 2452   | histone demethylase activity                            | 6/1689 | 10     | 709     | 744     | 675     | 6  |
| GO:000 |                                                         |        | 50/227 | 0.01061 | 0.08427 | 0.06959 |    |
| 1221   | transcription cofactor binding                          | 9/1689 | 10     | 33      | 744     | 675     | 9  |
| GO:001 |                                                         | 13/168 | 86/227 | 0.01080 | 0.08518 | 0.07034 |    |
| 5238   | drug transmembrane transporter activity                 | 9      | 10     | 678     | 287     | 446     | 13 |
| GO:004 |                                                         |        | 42/227 | 0.01116 | 0.08733 | 0.07212 |    |
| 2887   | amide transmembrane transporter activity                | 8/1689 | 10     | 121     | 444     | 123     | 8  |
| GO:004 |                                                         | 32/168 | 282/22 | 0.01125 | 0.08746 | 0.07222 |    |
| 2623   | ATPase activity, coupled                                | 9      | 710    | 913     | 223     | 677     | 32 |
| GO:001 |                                                         | 21/168 | 166/22 | 0.01172 | 0.09005 | 0.07436 |    |
| 9903   | protein phosphatase binding                             | 9      | 710    | 748     | 024     | 395     | 21 |
| GO:004 |                                                         | 15/168 | 106/22 | 0.01176 | 0.09005 | 0.07436 |    |
| 2562   | hormone binding                                         | 9      | 710    | 029     | 024     | 395     | 15 |
| GO:003 | pyridoxal phosphate binding                             | 9/1689 | 51/227 | 0.01205 | 0.09168 | 0.07571 | 9  |

|        |                                                             |        |        |         |         |         |
|--------|-------------------------------------------------------------|--------|--------|---------|---------|---------|
| 0170   |                                                             | 10     | 953    | 666     | 532     |         |
| GO:000 |                                                             | 14/168 | 97/227 | 0.01240 | 0.09368 | 0.07736 |
| 4197   | cysteine-type endopeptidase activity                        | 9      | 10     | 959     | 369     | 448     |
| GO:000 |                                                             |        | 27/227 | 0.01278 | 0.09585 | 0.07915 |
| 8574   | ATP-dependent microtubule motor activity, plus-end-directed | 6/1689 | 10     | 608     | 088     | 415     |
| GO:000 |                                                             | 19/168 | 147/22 | 0.01290 | 0.09607 | 0.07933 |
| 8083   | growth factor activity                                      | 9      | 710    | 571     | 584     | 993     |
| GO:000 |                                                             |        | 35/227 | 0.01321 | 0.09701 | 0.08011 |
| 1965   | G-protein alpha-subunit binding                             | 7/1689 | 10     | 288     | 51      | 557     |
| GO:190 |                                                             |        | 35/227 | 0.01321 | 0.09701 | 0.08011 |
| 1567   | fatty acid derivative binding                               | 7/1689 | 10     | 288     | 51      | 557     |
| GO:007 |                                                             |        | 52/227 | 0.01364 | 0.09826 | 0.08114 |
| 0279   | vitamin B6 binding                                          | 9/1689 | 10     | 766     | 17      | 503     |
| GO:000 |                                                             |        | 20/227 | 0.01365 | 0.09826 | 0.08114 |
| 4602   | glutathione peroxidase activity                             | 5/1689 | 10     | 764     | 17      | 503     |
| GO:005 |                                                             |        | 20/227 | 0.01365 | 0.09826 | 0.08114 |
| 1861   | glycolipid binding                                          | 5/1689 | 10     | 764     | 17      | 503     |
| GO:001 |                                                             | 11/168 | 70/227 | 0.01383 | 0.09884 | 0.08162 |
| 6597   | amino acid binding                                          | 9      | 10     | 085     | 444     | 625     |
| mmu04  |                                                             |        | 86/891 | 1.9864E | 0.00402 | 0.00337 |
| 146    | Peroxisome                                                  | 21/810 | 0      | -05     | 232     | 356     |
| mmu05  |                                                             |        | 94/891 | 2.595E- | 0.00402 | 0.00337 |
| 414    | Dilated cardiomyopathy                                      | 22/810 | 0      | 05      | 232     | 356     |
| mmu00  |                                                             |        | 32/891 | 7.0763E | 0.00731 | 0.00613 |
| 020    | Citrate cycle (TCA cycle)                                   | 11/810 | 0      | -05     | 219     | 28      |
| mmu00  | Propanoate metabolism                                       | 11/810 | 34/891 | 0.00013 | 0.00943 | 0.00791 |

|       |                                                      |        |        |         |         |         |    |
|-------|------------------------------------------------------|--------|--------|---------|---------|---------|----|
| 640   |                                                      |        | 0      | 246     | 331     | 181     |    |
| mmu05 |                                                      |        | 91/891 | 0.00015 | 0.00943 | 0.00791 |    |
| 410   | Hypertrophic cardiomyopathy                          | 20/810 | 0      | 215     | 331     | 181     | 20 |
| mmu05 |                                                      |        | 146/89 | 0.00026 | 0.01357 | 0.01138 |    |
| 418   | Fluid shear stress and atherosclerosis               | 27/810 | 10     | 271     | 332     | 407     | 27 |
| mmu04 |                                                      |        | 230/89 | 0.00040 | 0.01775 | 0.01488 |    |
| 714   | Thermogenesis                                        | 37/810 | 10     | 943     | 034     | 738     | 37 |
| mmu04 |                                                      |        | 151/89 | 0.00045 | 0.01775 | 0.01488 |    |
| 932   | Non-alcoholic fatty liver disease                    | 27/810 | 10     | 993     | 034     | 738     | 27 |
| mmu04 |                                                      |        | 114/89 | 0.00051 | 0.01775 | 0.01488 |    |
| 066   | HIF-1 signaling pathway                              | 22/810 | 10     | 874     | 034     | 738     | 22 |
| mmu00 |                                                      |        | 28/891 | 0.00057 | 0.01775 | 0.01488 |    |
| 650   | Butanoate metabolism                                 | 9/810  | 0      | 259     | 034     | 738     | 9  |
| mmu05 |                                                      |        | 248/89 | 0.00090 | 0.02540 | 0.02131 |    |
| 012   | Parkinson disease                                    | 38/810 | 10     | 161     | 895     | 073     | 38 |
| mmu05 |                                                      |        | 70/891 | 0.00130 | 0.03365 | 0.02823 |    |
| 140   | Leishmaniasis                                        | 15/810 | 0      | 295     | 941     | 048     | 15 |
| mmu00 |                                                      |        | 57/891 | 0.00147 | 0.03383 | 0.02837 |    |
| 280   | Valine, leucine and isoleucine degradation           | 13/810 | 0      | 743     | 667     | 914     | 13 |
| mmu04 |                                                      |        | 44/891 | 0.00152 | 0.03383 | 0.02837 |    |
| 962   | Vasopressin-regulated water reabsorption             | 11/810 | 0      | 811     | 667     | 914     | 11 |
| mmu04 |                                                      |        | 101/89 | 0.00166 | 0.03448 | 0.02892 |    |
| 933   | AGE-RAGE signaling pathway in diabetic complications | 19/810 | 10     | 883     | 905     | 63      | 19 |
| mmu05 |                                                      |        | 110/89 | 0.00195 | 0.03777 | 0.03168 |    |
| 145   | Toxoplasmosis                                        | 20/810 | 10     | 982     | 572     | 287     | 20 |
| mmu05 | Prion disease                                        | 39/810 | 268/89 | 0.00207 | 0.03777 | 0.03168 | 39 |



|       |                                                        |        |        |         |         |         |    |
|-------|--------------------------------------------------------|--------|--------|---------|---------|---------|----|
| 020   |                                                        |        | 10     | 157     | 572     | 287     |    |
| mmu05 |                                                        |        | 370/89 | 0.00267 | 0.04601 | 0.03859 |    |
| 014   | Amyotrophic lateral sclerosis                          | 50/810 | 10     | 212     | 977     | 723     | 50 |
| mmu04 |                                                        |        | 131/89 | 0.00338 | 0.05524 | 0.04633 |    |
| 142   | Lysosome                                               | 22/810 | 10     | 596     | 466     | 423     | 22 |
| mmu01 |                                                        |        | 124/89 | 0.00374 | 0.05799 | 0.04864 |    |
| 200   | Carbon metabolism                                      | 21/810 | 10     | 182     | 825     | 369     | 21 |
| mmu05 |                                                        |        | 369/89 | 0.00417 | 0.06157 | 0.05164 |    |
| 010   | Alzheimer disease                                      | 49/810 | 10     | 143     | 819     | 623     | 49 |
| mmu04 |                                                        |        | 110/89 | 0.00454 | 0.06402 | 0.05369 |    |
| 931   | Insulin resistance                                     | 19/810 | 10     | 382     | 661     | 974     | 19 |
| mmu04 |                                                        |        | 120/89 | 0.00553 | 0.07214 | 0.06050 |    |
| 919   | Thyroid hormone signaling pathway                      | 20/810 | 10     | 234     | 297     | 701     | 20 |
| mmu00 |                                                        |        | 25/891 | 0.00558 | 0.07214 | 0.06050 |    |
| 563   | Glycosylphosphatidylinositol (GPI)-anchor biosynthesis | 7/810  | 0      | 526     | 297     | 701     | 7  |
| mmu05 |                                                        |        | 180/89 | 0.00633 | 0.07636 | 0.06404 |    |
| 152   | Tuberculosis                                           | 27/810 | 10     | 567     | 57      | 865     | 27 |
| mmu05 |                                                        |        | 304/89 | 0.00643 | 0.07636 | 0.06404 |    |
| 016   | Huntington disease                                     | 41/810 | 10     | 205     | 57      | 865     | 41 |
| mmu04 |                                                        |        | 90/891 | 0.00665 | 0.07636 | 0.06404 |    |
| 211   | Longevity regulating pathway                           | 16/810 | 0      | 121     | 57      | 865     | 16 |

Table S8. Primer sequences

| Name           | Sequence                  |
|----------------|---------------------------|
| mm_Wnk2_qRT_F2 | GGCTCTGTGAAGATTGGTGACTTGG |
| mm_Wnk2_qRT_R2 | GAAGGCGTAGACATCAACCGACTC  |
| mm_Ces1d_qRT_F | ACAACAGATGTAAAGCCCATTGC   |
| mm_Ces1d_qRT_R | GCCTTTGGCAGAACTACTCCAT    |
| mm_Whrn_qRT_F  | TCAAGGTGGGCCACGTAATTC     |
| mm_Whrn_qRT_R  | ACCAGAAAGTCGATGTAGTCTCT   |
| mm_qRT_actb_F2 | GGCTGTATTCCCCTCCATCG      |
| mm_qRT_actb_R2 | CCAGTTGGTAACAATGCCATGT    |
| mm_nppb_qRT_F  | GAGGTCACCTCCTATCCTCTGG    |
| mm_nppb_qRT_R  | GCCATTCCTCCGACTTTTCTC     |
